# Supplementary material for: Physiological and molecular response mechanisms of tomato seedlings to cadmium (Cd) and lead (Pb) stress
Source: PeerJ. 2024 Nov 29;12:e18533. doi: 10.7717/peerj.18533 (PMC11610467; doi:10.7717/peerj.18533)
Supplement: Supplemental Information 1 [file peerj-12-18533-s001.xlsx]

## Sheet: Table 1
The increment of plant height
5 d
Control	0.9	0.85	0.8
Cd	1.6	1.75	1.9
Pb	1.2	1.25	1.3
Cd+Pb	1.2	1	1.1
10 d
Control	1.2	1.1	1
Cd	1.6	1.5	1.2
Pb	1	1	1.1
Cd+Pb	1.5	1.4	1.5
15 d
Control	0.6	0.5	0.4
Cd	0.95	0.9	1
Pb	0.6	0.7	0.6
Cd+Pb	1.1	1.2	1.15
The increment of stem diameter
5 d
Control	0.25	0.25	0.19	0.35
Cd	0.47	0.59	0.52	0.39
Pb	0.32	0.22	0.35	0.35
Cd+Pb	0.35	0.4	0.4	0.48	0.33
10 d
Control	0.03	0.03	0.03
Cd	0.23	0.27	0.21
Pb	0.18	0.15	0.17
Cd+Pb	0.2	0.22	0.21
15 d
Control	0.06	0.08	0.04
Cd	0.33	0.22	0.27
Pb	0.24	0.21	0.21	0.16	0.17
Cd+Pb	0.22	0.15	0.22	0.14
The increment of leaf length
5 d
Control	0.9	1	0.8
Cd	0.7	0.7	0.7
Pb	0.4	0.2	0.2
Cd+Pb	0.7	0.7	0.6
10 d
Control	0.4	0.25	0.2
Cd	0.4	0.45	0.4
Pb	0.1	0.2	0.2
Cd+Pb	0.3	0.4	0.3	0.3
15 d
Control	0.1	0.1	0.15	0.1
Cd	0.1	0.1	0.1
Pb	0.25	0.1	0.1	0.1	Control
Cd+Pb	0.1	0.2	0.2	0.3	Cd
The increment of leaf width					Pb
5 d					Cd+Pb
Control	0.3	0.3	0.38
Cd	0.25	0.1	0.2
Pb	0.2	0.25	0.25
Cd+Pb	0.3	0.3	0.3
10 d
Control	0.2	0.1	0.1
Cd	0.1	0.1	0.2	0.2
Pb	0.1	0.05	0
Cd+Pb	0.1	0.1	0.1	0.1
15 d
Control	0.1	0.1	0.1
Cd	0.1	0.05	0
Pb	0	0	0.05
Cd+Pb	0.1	0.2	0.15

## Sheet: Figure 1
Electrolytic leakage
0 d
Control	63.0769	57.0093	64	64.7619	52.5
Cd	63.0769	57.0093	64	64.7619	52.5
Pb	63.0769	57.0093	64	64.7619	52.5
Cd+Pb	63.0769	57.0093	64	64.7619	52.5
5 d
Control	33.3333	42.8571	31.4286
Cd	46.1538	42.5197	46.4789	47.4359
Pb	62.2517	56.4516	54.1667	58.3333
Cd+Pb	48.6667	48.5714	49.0196
10 d
Control	42.3611	38.4615	40.4113
Cd	40.2439	40.1235	40.9357
Pb	43.9655	43.3333	43.9655
Cd+Pb	46.6667	49.0196	47.5524
15 d
Control	25.8993	26.4	23.6641
Cd	30.7018	30	28.8136
Pb	59.633	60.251	60.8696
Cd+Pb	50	51.8868	55.0388	56.3025
Proline content
0 d	127.385	120.181	110.955
Control	127.385	120.181	110.955
Cd	127.385	120.181	110.955
Pb	127.385	120.181	110.955
Cd+Pb	127.385	120.181	110.955
5 d
Control	125.995	127.327	128.659
Cd	15.3347	16.3392	14.3302
Pb	7.95142	7.5072	8.39564
Cd+Pb	9.456	8.496	8.976
10 d
Control	78.8825	90.2592	82.496
Cd	24.8892	26.576	23.2025
Pb	12.1813	11.3629	14.8538
Cd+Pb	18.2592	18.6432	12.0611
15 d
Control	103.835	106.416	105.125
Cd	14.6793	14.3624	14.0455
Pb	16.4304	18.256	14.6048
Cd+Pb	28.608	29.616	29.112
Soluble sugar content
0 d
Control	5.3001	6.28875	5.8266
Cd	5.3001	6.28875	5.8266
Pb	5.3001	6.28875	5.8266
Cd+Pb	5.3001	6.28875	5.8266
5 d
Control	5.28171	5.66614	5.967
Cd	2.83075	2.8665	2.795
Pb	3.042	2.87625	2.7105
Cd+Pb	3.4047	3.52885	3.653
10 d
Control	3.57072	3.44618	3.69525
Cd	3.2253	3.2136	3.237
Pb	4.056	3.926	3.991
Cd+Pb	3.44086	3.44618	3.43555
15 d
Control	4.914	4.995	5.2767
Cd	3.59775	3.72288	3.848
Pb	4.74382	4.3407	4.54226
Cd+Pb	3.4086	3.36889	3.32918

## Sheet: Figure 2
MDA content
0 d
Control	41.022	40.1073	34.9473
Cd	41.022	40.1073	34.9473
Pb	41.022	40.1073	34.9473
Cd+Pb	41.022	40.1073	34.9473
5 d
Control	28.6667	26.574	26.015
Cd	32.25	29.928	30.0218
Pb	24.94	23.865	24.94
Cd+Pb	29.5527	28.3214	27.09
10 d
Control	28.38	28.38	28.38
Cd	43.4631	39.345	38.3031
Pb	30.616	32.3492	31.4826
Cd+Pb	35.604	32.6018	34.1029
15 d
Control	34.6867	34.5075	31.6971
Cd	43	45.58	44.29
Pb	30.5077	29.1171	31.8982
Cd+Pb	37.668	37.3631	37.0582
H2O2 content
0 d
Control	3.53462	3.38505	3.45983
Cd	3.53462	3.38505	3.45983
Pb	3.53462	3.38505	3.45983
Cd+Pb	3.53462	3.38505	3.45983
5 d
Control	5.45529	5.74551	5.6004
Cd	5.17984	5.48507	4.87462
Pb	4.73142	4.39297	4.13018
Cd+Pb	3.87796	4.43643	3.51905
10 d
Control	5.21707	4.62178	5.05329
Cd	4.80869	4.62197	4.45705
Pb	5.62069	5.44658	5.76687
Cd+Pb	4.47262	4.92316	4.89547
15 d
Control	5.48596	5.84776	5.36596
Cd	4.98554	5.14262	4.82847
Pb	7.78138	7.60316	7.9596
Cd+Pb	4.69447	4.92897	4.59105
O2.- content
0 d
Control	132.126	148.314	137.901
Cd	132.126	148.314	137.901
Pb	132.126	148.314	137.901
Cd+Pb	132.126	148.314	137.901
5 d
Control	222.694	215.144	243.037
Cd	201.096	183.516	190.278
Pb	105.289	102.374	90.413
Cd+Pb	186.22	152.107	163.19
10 d
Control	217.685	202.449	203.355
Cd	139.376	136.562	142.19
Pb	139.388	144.958	142.173
Cd+Pb	90.2973	102.198	113.553
15 d
Control	204.843	201.867	207.818
Cd	114.545	131.95	123.248
Pb	126.074	128.975	127.525
Cd+Pb	95.3214	92.9074	97.7353

## Sheet: Figure 3
SOD activity
0 d
Control	1173.61	1279.38	1102.45
Cd	1173.61	1279.38	1102.45
Pb	1173.61	1279.38	1102.45
Cd+Pb	1173.61	1279.38	1102.45
5 d
Control	1550.81	1613.53	1488.09
Cd	1310.74	1277.41	1344.07
Pb	1956.64	1902.56	1848.48
Cd+Pb	1513.74	1595.55	1677.37
10 d
Control	1218.82	1161.67	1104.51
Cd	1531.25	1467.48	1499.36
Pb	1304.12	1597.4	1450.76
Cd+Pb	1547.47	1548.73	1550
15 d
Control	1529.41	1506.81	1518.11
Cd	1843.33	1806.49	1775.97
Pb	1848.48	1838.15	1827.81
Cd+Pb	1688.39	1717.95	1658.82
POD activity
0 d
Control	3511.11	3488.89	2900
Cd	3511.11	3488.89	2900
Pb	3511.11	3488.89	2900
Cd+Pb	3511.11	3488.89	2900
5 d
Control	3015.38	3000	2984.62
Cd	2709.09	2872.73	2790.91
Pb	3400	3300	3200
Cd+Pb	3059.85	3036.36	3083.33
10 d
Control	2960	2907.69	3111.11
Cd	3436.36	3434.85	3433.33
Pb	3251.43	3560	2942.86
Cd+Pb	4600	3909.09	4254.55
15 d
Control	3444.44	3244.44	3344.44
Cd	2850	2915.91	2981.82
Pb	3041.11	3022.22	3060
Cd+Pb	3440	3400	3480
CAT acticity
0 d
Control	57.3692	67.8	50.85
Cd	57.3692	67.8	50.85
Pb	57.3692	67.8	50.85
Cd+Pb	57.3692	67.8	50.85
5 d
Control	130.385	149.16	139.772
Cd	128.067	117.109	122.588
Pb	73.2788	86.2909	60.2667
Cd+Pb	125.914	139.232	152.55
10 d
Control	81.36	78.3467	75.3333
Cd	124.3	124.3	124.3
Pb	101.7	128.82	115.26
Cd+Pb	169.5	129.436	149.468
15 d
Control	188.333	180.8	184.567
Cd	98.6182	104.782	92.4545
Pb	134.847	120.533	149.16
Cd+Pb	123.635	149.958	176.28
APX activity
0 d
Control	2.01818	1.90209	1.786
Cd	2.01818	1.90209	1.786
Pb	2.01818	1.90209	1.786
Cd+Pb	2.01818	1.90209	1.786
5 d
Control	2.13528	1.786	1.96064
Cd	2.59664	2.54009	2.65318
Pb	2.64675	2.87248	2.42102
Cd+Pb	1.3395	2.00032	1.66991
10 d
Control	2.24062	2.02955	2.45169
Cd	1.47002	1.6074	1.33263
Pb	0.441539	0.664789	0.218289
Cd+Pb	1.33508	1.54361	1.12655
15 d
Control	2.63931	2.30196	2.97667
Cd	1.75623	1.77112	1.786
Pb	2.09855	2.54911	2.32383
Cd+Pb	2.12946	1.70265	1.91606
