# Supplementary material for: Physiological and molecular response mechanisms of tomato seedlings to cadmium (Cd) and lead (Pb) stress
Source: PeerJ. 2024 Nov 29;12:e18533. doi: 10.7717/peerj.18533 (PMC11610467; doi:10.7717/peerj.18533)
Supplement: Supplemental Information 8 [file peerj-12-18533-s008.xlsx]

## Sheet: Table S2
Sample	Raw reads	Total reads	Clean reads(%)	Total mapped(%)	Q20(%)	Q30(%)	GC content(%)
Control_1	51514232	51012490	99.03	96.12	97.7	96.03	43.17
Control_2	50964352	50500870	99.09	97.17	97.76	96.2	43.04
Control_3	72834184	71876652	98.69	97.59	97.75	96.18	43.07
Cd_1	43786610	43187900	98.63	97.57	97.42	95.35	43
Cd_2	53496238	52960908	99	97.48	97.66	95.87	43.15
Cd_3	43678752	43060962	98.59	97.21	97.45	95.39	43.1
Pb_1	54803588	54251126	98.99	97.22	97.64	95.87	43.16
Pb_2	43792024	43294832	98.86	97.13	97.56	95.6	42.98
Pb_3	47153504	46696096	99.03	97.48	97.63	95.81	42.84
Cd+Pb_1	46674548	46238344	99.07	97.33	97.58	95.7	42.9
Cd+Pb_2	43790406	43317062	98.92	97.27	97.61	95.75	43.11
Cd+Pb_3	56708294	56254440	99.2	97.21	97.68	95.96	42.95
