# Supplementary material for: Physiological and molecular response mechanisms of tomato seedlings to cadmium (Cd) and lead (Pb) stress
Source: PeerJ. 2024 Nov 29;12:e18533. doi: 10.7717/peerj.18533 (PMC11610467; doi:10.7717/peerj.18533)
Supplement: Supplemental Information 9 [file peerj-12-18533-s009.xlsx]

## Sheet: Cd_vs_Control_cluster1
Supplementary Dataset 1a. Gene co-expression clusters of DEGs in Cd vs. Control group of tomato seedlings.
Gene_id	Gene_name	Gene_description	Control_1	Control_2	Control_3	Cd_1	Cd_2	Cd_3	Control	Cd	GO_id	GO_term	KO_id	KO_name	Pathway_id	Pathway_definition	COG_id	COG_Functional Categories	NR_hit-name	NR_description	Swiss-Prot_hit-name	Swiss-Prot_description	Pfam_id	Domain	Domain description
gene_Solyc00g500199.1	Solyc00g500199.1	Photosystem I P700 chlorophyll a apoprotein .1	0	0.08	0.47	2.59	2.58	3.93	0.183333	3.03333	GO:0018298;GO:0009635;GO:0002181;GO:0015979;GO:0009772;GO:0009579;GO:0009536;GO:0009522;GO:0009523;GO:0022625;GO:0005840;GO:0016021;GO:0005739;GO:0009507;GO:0016168;GO:0000166;GO:0003735;GO:0016740;GO:0003723;GO:0045156;GO:004687	BP:protein-chromophore linkage;BP:response to herbicide;BP:cytoplasmic translation;BP:photosynthesis;BP:photosynthetic electron transport in photosystem II;CC:thylakoid;CC:plastid;CC:photosystem I;CC:photosystem II;CC:cytosolic large ribosomal subunit;CC:ribosome;CC:integral component of membrane;CC:mitochondrion;CC:chloroplast;MF:chlorophyll binding;MF:nucleotide binding;MF:structural constituen…	K02886	RP-L2, MRPL2, rplB	map03010	Ribosome	COG0090;ENOG410YXWC	J:Translation, ribosomal structure and biogenesis;S:Function unknown	KAG7012670.1	putative protein ycf72, partial [Cucurbita argyrosperma subsp. argyrosperma]	sp|Q6ENC9|YCF72_ORYNI;	Uncharacterized protein ycf72 OS=Oryza nivara OX=4536 GN=ycf72-1 PE=3 SV=1;	------	------	------
gene_Solyc00g500405.1	Solyc00g500405.1	Disease resistance protein (TIR-NBS-LRR class) family (AHRD V3.3 *-* A0A2U1N0W2_ARTAN)	0	0	0	4.25	0	1.61	0	1.95333	GO:0006952;GO:0007165;GO:0016787;GO:004353	BP:defense response;BP:signal transduction;MF:hydrolase activity;MF:ADP binding;	------	------	------	------	COG4886;COG0020	S:Function unknown;I:Lipid transport and metabolism	XP_025888012.1	TMV resistance protein N [Solanum lycopersicum]	sp|Q40392|TMVRN_NICGU;	TMV resistance protein N OS=Nicotiana glutinosa OX=35889 GN=N PE=1 SV=1;	------	------	------
gene_Solyc01g005230.5	Solyc01g005230.5	S-adenosyl-L-methionine-dependent methyltransferases superfamily protein (AHRD V3.11 *** tr|A0A2U1QHF5|A0A2U1QHF5_ARTAN)	0.32	0.36	0.29	1.58	0.99	1.65	0.323333	1.40667	GO:0032259;GO:0008757;GO:0046872;GO:000816	BP:methylation;MF:S-adenosylmethionine-dependent methyltransferase activity;MF:metal ion binding;MF:methyltransferase activity;	------	------	------	------	ENOG4111PH9	S:Function unknown	XP_015086811.2	probable S-adenosylmethionine-dependent methyltransferase At5g38780 [Solanum pennellii]	sp|B2KPR3|LAMT_CATRO;	Loganic acid O-methyltransferase OS=Catharanthus roseus OX=4058 GN=LAMT PE=1 SV=1;	PF03492.17	Methyltransf_7	SAM dependent carboxyl methyltransferase
gene_Solyc01g005470.3	Solyc01g005470.3	protein PLANT CADMIUM RESISTANCE 2-like (AHRD V3.3 *** A0A1U8ETE7_CAPAN)	15.85	17.66	23.28	74.06	30.28	40.26	18.93	48.2	GO:001602	CC:integral component of membrane;	------	------	------	------	ENOG410XUTP	S:Function unknown	XP_004228721.1	protein PLANT CADMIUM RESISTANCE 2 [Solanum lycopersicum]	sp|Q9LQU4|PCR2_ARATH;	Protein PLANT CADMIUM RESISTANCE 2 OS=Arabidopsis thaliana OX=3702 GN=PCR2 PE=1 SV=1;	PF04749.19	PLAC8	PLAC8 family
gene_Solyc01g044370.3	Solyc01g044370.3	Molybdenum cofactor sulfurase family protein (AHRD V3.3 *** A0A2U1MM41_ARTAN)	0.55	0.66	0.96	1.48	1.85	2.42	0.723333	1.91667	GO:0003824;GO:0030170;GO:003015	MF:catalytic activity;MF:pyridoxal phosphate binding;MF:molybdenum ion binding;	------	------	------	------	COG3217	S:Function unknown	XP_025884709.1	mitochondrial amidoxime-reducing component 1-like [Solanum lycopersicum]	sp|Q9CW42|MARC1_MOUSE;	Mitochondrial amidoxime-reducing component 1 OS=Mus musculus OX=10090 GN=Mtarc1 PE=1 SV=2;	PF03473.19;PF03476.18	MOSC;MOSC_N	MOSC domain;MOSC N-terminal beta barrel domain
gene_Solyc01g060180.4	Solyc01g060180.4	AMP-dependent synthetase/ligase (AHRD V3.3 *** A0A200R265_9MAGN)	49.38	53.18	48.62	97.14	75.06	97.48	50.3933	89.8933	GO:0003824;GO:001687	MF:catalytic activity;MF:ligase activity;	K01913	AAE7, ACN1	map00630;map00010;map00620;map00650	Glyoxylate and dicarboxylate metabolism;Glycolysis / Gluconeogenesis;Pyruvate metabolism;Butanoate metabolism	COG0318;COG0318	I:Lipid transport and metabolism;Q:Secondary metabolites biosynthesis, transport and catabolism	XP_004228999.1	acetate/butyrate--CoA ligase AAE7, peroxisomal [Solanum lycopersicum]	sp|M4IS88|CCL3_HUMLU;	Acetate--CoA ligase CCL3 OS=Humulus lupulus OX=3486 GN=CCL3 PE=1 SV=1;	PF00501.30;PF13193.8	AMP-binding;AMP-binding_C	AMP-binding enzyme;AMP-binding enzyme C-terminal domain
gene_Solyc01g079940.5	Solyc01g079940.5	Eukaryotic aspartyl protease family protein (AHRD V3.11 *** tr|A0A2U1KXX4|A0A2U1KXX4_ARTAN)	3.08	4.74	3.43	11.8	13.89	10.8	3.75	12.1633	GO:000419	MF:aspartic-type endopeptidase activity;	------	------	------	------	ENOG410XNV7	O:Posttranslational modification, protein turnover, chaperones	XP_004229430.1	basic 7S globulin [Solanum lycopersicum]	sp|P0DO21|GIP2_NICBE;	Probable aspartic proteinase GIP2 OS=Nicotiana benthamiana OX=4100 GN=GIP2 PE=1 SV=1;	PF14541.8;PF14543.8	TAXi_C;TAXi_N	Xylanase inhibitor C-terminal;Xylanase inhibitor N-terminal
gene_Solyc01g080020.2	Solyc01g080020.2	Eukaryotic aspartyl protease family protein (AHRD V3.3 *** A0A2U1ML86_ARTAN)	78.44	123.91	156.37	199.38	276.92	205.59	119.573	227.297	GO:000419	MF:aspartic-type endopeptidase activity;	------	------	------	------	ENOG410XNV7	O:Posttranslational modification, protein turnover, chaperones	XP_004229435.1	basic 7S globulin [Solanum lycopersicum]	sp|P0DO21|GIP2_NICBE;	Probable aspartic proteinase GIP2 OS=Nicotiana benthamiana OX=4100 GN=GIP2 PE=1 SV=1;	PF14541.8;PF14543.8	TAXi_C;TAXi_N	Xylanase inhibitor C-terminal;Xylanase inhibitor N-terminal
gene_Solyc01g080570.5	Solyc01g080570.5	Inosine-uridine preferring nucleoside hydrolase family protein (AHRD V3.11 *** tr|A0A2U1LEG5|A0A2U1LEG5_ARTAN)	0.82	0.54	0.39	1.46	2.08	1.58	0.583333	1.70667	GO:001602	CC:integral component of membrane;	------	------	------	------	COG1957	F:Nucleotide transport and metabolism	XP_004229485.1	uncharacterized protein LOC101244900 [Solanum lycopersicum]	sp|A8AJF8|RIHA_CITK8;	Pyrimidine-specific ribonucleoside hydrolase RihA OS=Citrobacter koseri;	PF01156.21	IU_nuc_hydro	Inosine-uridine preferring nucleoside hydrolase
gene_Solyc01g087785.2	Solyc01g087785.2	Subtilisin-like protease (AHRD V3.11 *-* tr|Q38708|Q38708_ALNGL)	0.87	0.84	0.56	7.34	3.97	11	0.756667	7.43667	GO:0016021;GO:000425	CC:integral component of membrane;MF:serine-type endopeptidase activity;	------	------	------	------	COG1404	O:Posttranslational modification, protein turnover, chaperones	KAG5627544.1	hypothetical protein H5410_012762 [Solanum commersonii]	sp|O82777|SBT3_SOLLC;	Subtilisin-like protease SBT3 OS=Solanum lycopersicum OX=4081 GN=sbt3 PE=1 SV=1;	------	------	------
gene_Solyc01g087790.2	Solyc01g087790.2	Subtilisin-like protease (AHRD V3.3 *** O82006_SOLLC)	20.56	20.04	16.14	39.75	33.52	48.96	18.9133	40.7433	GO:0006508;GO:000425	BP:proteolysis;MF:serine-type endopeptidase activity;	------	------	------	------	COG1404	O:Posttranslational modification, protein turnover, chaperones	NP_001316530.1	subtilisin-like serine protease family protein [Solanum lycopersicum]	sp|O82777|SBT3_SOLLC;	Subtilisin-like protease SBT3 OS=Solanum lycopersicum OX=4081 GN=sbt3 PE=1 SV=1;	PF00082.24;PF17766.3;PF05922.18	Peptidase_S8;fn3_6;Inhibitor_I9	Subtilase family;Fibronectin type-III domain;Peptidase inhibitor I9
gene_Solyc01g087800.2	Solyc01g087800.2	Subtilisin-like protease (AHRD V3.3 *** O82777_SOLLC)	28.87	34.9	26.67	150.19	124.42	181.27	30.1467	151.96	GO:0006508;GO:000425	BP:proteolysis;MF:serine-type endopeptidase activity;	------	------	------	------	COG1404	O:Posttranslational modification, protein turnover, chaperones	XP_004229664.2	subtilisin-like protease SBT1.9 [Solanum lycopersicum]	sp|O82777|SBT3_SOLLC;	Subtilisin-like protease SBT3 OS=Solanum lycopersicum OX=4081 GN=sbt3 PE=1 SV=1;	PF00082.24;PF17766.3;PF05922.18	Peptidase_S8;fn3_6;Inhibitor_I9	Subtilase family;Fibronectin type-III domain;Peptidase inhibitor I9
gene_Solyc01g094340.3	Solyc01g094340.3	Acetyl-coenzyme A carboxylase carboxyl transferase subunit alpha (AHRD V3.3 *** B5LAS6_CAPAN)	20.15	26.91	23.48	50.2	44.67	58.31	23.5133	51.06	GO:0006633;GO:2001295;GO:0009317;GO:0009507;GO:0016740;GO:0003989;GO:000552	BP:fatty acid biosynthetic process;BP:malonyl-CoA biosynthetic process;CC:acetyl-CoA carboxylase complex;CC:chloroplast;MF:transferase activity;MF:acetyl-CoA carboxylase activity;MF:ATP binding;	K01962	accA	map00640;map00061;map00620	Propanoate metabolism;Fatty acid biosynthesis;Pyruvate metabolism	COG0825	I:Lipid transport and metabolism	XP_004229885.1	acetyl-coenzyme A carboxylase carboxyl transferase subunit alpha, chloroplastic isoform X1 [Solanum lycopersicum]	sp|Q9LD43|ACCA_ARATH;	Acetyl-coenzyme A carboxylase carboxyl transferase subunit alpha, chloroplastic OS=Arabidopsis thaliana OX=3702 GN=CAC3 PE=1 SV=1;	PF03255.16;PF01039.24	ACCA;Carboxyl_trans	Acetyl co-enzyme A carboxylase carboxyltransferase alpha subunit;Carboxyl transferase domain
gene_Solyc01g102910.5	Solyc01g102910.5	Germin-like protein subfamily 1 member (AHRD V3.11 *** tr|A0A2K3JPE5|A0A2K3JPE5_TRIPR)	0	0	0.04	1.19	0.25	0.82	0.013333	0.753333	GO:0009737;GO:0045892;GO:0005618;GO:0005634;GO:0048046;GO:0030145;GO:004573	BP:response to abscisic acid;BP:negative regulation of transcription, DNA-templated;CC:cell wall;CC:nucleus;CC:apoplast;MF:manganese ion binding;MF:nutrient reservoir activity;	------	------	------	------	ENOG410YERY	S:Function unknown	XP_004230405.1	germin-like protein subfamily 1 member 14 [Solanum lycopersicum]	sp|Q9FID0|GL114_ARATH;	Germin-like protein subfamily 1 member 14 OS=Arabidopsis thaliana OX=3702 GN=At5g39110 PE=3 SV=1;	PF00190.24;PF07883.13	Cupin_1;Cupin_2	Cupin;Cupin domain
gene_Solyc01g104710.3	Solyc01g104710.3	thionin-like protein (AHRD V3.3 -** AT1G25275.2)	10.49	7.85	5.87	35	29.14	25.55	8.07	29.8967	------	------	------	------	------	------	ENOG4111AA4	S:Function unknown	TMW99548.1	hypothetical protein EJD97_002369 [Solanum chilense]	------	------	------	------	------
gene_Solyc01g105050.3	Solyc01g105050.3	Chlorophyll a-b binding protein, chloroplastic (AHRD V3.3 *** A0A2G3AWK5_CAPCH)	345.43	540.36	616.57	891.67	1058.53	1118.68	500.787	1022.96	GO:0018298;GO:0009768;GO:0009416;GO:0009765;GO:0009535;GO:0009522;GO:0009523;GO:0016021;GO:001616	BP:protein-chromophore linkage;BP:photosynthesis, light harvesting in photosystem I;BP:response to light stimulus;BP:photosynthesis, light harvesting;CC:chloroplast thylakoid membrane;CC:photosystem I;CC:photosystem II;CC:integral component of membrane;MF:chlorophyll binding;	K08917	LHCB6	map00196	Photosynthesis - antenna proteins	ENOG410ZGWX	S:Function unknown	NP_001296291.1	chlorophyll a-b binding protein CP24 10B, chloroplastic [Solanum lycopersicum]	sp|P27525|CB4B_SOLLC;	Chlorophyll a-b binding protein CP24 10B, chloroplastic OS=Solanum lycopersicum OX=4081 GN=CAP10B PE=3 SV=1;	PF00504.23	Chloroa_b-bind	Chlorophyll A-B binding protein
gene_Solyc01g107190.3	Solyc01g107190.3	LOB domain-containing protein 38 (AHRD V3.3 *** A0A2G2V731_CAPBA)	14.68	15.01	18.06	39.13	41.13	36.81	15.9167	39.0233	GO:001046	BP:regulation of gene expression;	------	------	------	------	ENOG4111JGS	S:Function unknown	XP_004230706.1	LOB domain-containing protein 37 [Solanum lycopersicum]	sp|Q9FN11|LBD37_ARATH;	LOB domain-containing protein 37 OS=Arabidopsis thaliana OX=3702 GN=LBD37 PE=2 SV=1;	PF03195.16	LOB	Lateral organ boundaries
gene_Solyc01g107780.4	Solyc01g107780.4	Glycosyltransferase (AHRD V3.3 *** A0A1Q3DDW3_CEPFO)	4.42	4.38	3.48	11.65	3.63	7.8	4.09333	7.69333	GO:0016758;GO:000819	MF:transferase activity, transferring hexosyl groups;MF:UDP-glycosyltransferase activity;	------	------	------	------	COG1819	S:Function unknown	XP_004230753.1	scopoletin glucosyltransferase-like [Solanum lycopersicum]	sp|Q2V6J9|UFOG7_FRAAN;	UDP-glucose flavonoid 3-O-glucosyltransferase 7 OS=Fragaria ananassa OX=3747 GN=GT7 PE=1 SV=1;	PF00201.20	UDPGT	UDP-glucoronosyl and UDP-glucosyl transferase
gene_Solyc01g108910.5	Solyc01g108910.5	maternal effect embryo arrest 14 Chr2:6921196-6921978 REVERSE LENGTH=203 201606 (AHRD V3.11 *** AT2G15890.1)	294.83	401.77	371.96	692.34	620.33	787.23	356.187	699.967	GO:0010183;GO:0005829;GO:0005634;GO:003603	BP:pollen tube guidance;CC:cytosol;CC:nucleus;MF:mediator complex binding;	------	------	------	------	ENOG41123WT	S:Function unknown	XP_004230833.1	CCG-binding protein 1 [Solanum lycopersicum]	sp|Q9XIM0|MEE14_ARATH;	CCG-binding protein 1 OS=Arabidopsis thaliana OX=3702 GN=MEE14 PE=1 SV=1;	------	------	------
gene_Solyc01g109720.3	Solyc01g109720.3	Alpha/beta-Hydrolases superfamily protein (AHRD V3.3 *** Q9ASW5_ARATH)	0.91	0.25	0.45	3.59	1.58	2.74	0.536667	2.63667	GO:000382	MF:catalytic activity;	------	------	------	------	COG0596	S:Function unknown	XP_004230956.1	monoacylglycerol lipase abhd6-A [Solanum lycopersicum]	sp|P27747|ACOC_CUPNH;	Dihydrolipoyllysine-residue acetyltransferase component of acetoin cleaving system OS=Cupriavidus necator;	PF00561.22;PF12697.9;PF12146.10	Abhydrolase_1;Abhydrolase_6;Hydrolase_4	alpha/beta hydrolase fold;Alpha/beta hydrolase family;Serine aminopeptidase, S33
gene_Solyc01g110970.4	Solyc01g110970.4	Auxin-responsive protein SAUR20 (AHRD V3.11 *** tr|A0A2G2XYI3|A0A2G2XYI3_CAPAN)	3.19	3.6	5.5	7.64	6.53	8.3	4.09667	7.49	GO:000973	BP:response to auxin;	K14488	SAUR	map04075	Plant hormone signal transduction	ENOG4111DHX	S:Function unknown	XP_027775473.1	auxin-induced protein 15A-like [Solanum pennellii]	sp|P33081|AX15A_SOYBN;	Auxin-induced protein 15A OS=Glycine max OX=3847 PE=2 SV=1;	PF02519.16	Auxin_inducible	Auxin responsive protein
gene_Solyc01g111350.3	Solyc01g111350.3	Major facilitator superfamily protein (AHRD V3.3 *** Q9SW40_ARATH)	73.85	65.84	80.27	153.78	110.29	133.98	73.32	132.683	GO:0006817;GO:0016021;GO:001602	BP:phosphate ion transport;CC:integral component of membrane;CC:membrane;	------	------	------	------	ENOG410Y7MY	S:Function unknown	XP_004231025.1	protein NUCLEAR FUSION DEFECTIVE 4 [Solanum lycopersicum]	sp|F4I9E1|NFD4_ARATH;	Protein NUCLEAR FUSION DEFECTIVE 4 OS=Arabidopsis thaliana OX=3702 GN=NFD4 PE=3 SV=1;	PF06813.15	Nodulin-like	Nodulin-like
gene_Solyc01g111980.3	Solyc01g111980.3	Lysine histidine transporter-like 8 (AHRD V3.3 *** A0A2G2XYM3_CAPAN)	119.4	90.67	77.05	222.34	185.63	200.53	95.7067	202.833	GO:0006865;GO:0016021;GO:000588	BP:amino acid transport;CC:integral component of membrane;CC:plasma membrane;	------	------	------	------	COG0814	E:Amino acid transport and metabolism	XP_004231077.1	lysine histidine transporter-like 8 [Solanum lycopersicum]	sp|Q9SX98|LHTL8_ARATH;	Lysine histidine transporter-like 8 OS=Arabidopsis thaliana OX=3702 GN=AATL1 PE=1 SV=1;	PF01490.20	Aa_trans	Transmembrane amino acid transporter protein
gene_Solyc02g005003.1	Solyc02g005003.1	Unknown protein	7.52	8.11	5.45	11.72	11.01	11.52	7.02667	11.4167	GO:0009507;GO:000871	CC:chloroplast;MF:D-alanine-D-alanine ligase activity;	------	------	------	------	COG0507;COG0347;COG0304;COG1181	L:Replication, recombination and repair;E:Amino acid transport and metabolism;I:Lipid transport and metabolism;M:Cell wall/membrane/envelope biogenesis	XP_010326176.1	uncharacterized protein LOC104649147 [Solanum lycopersicum]	sp|P52410|KASC1_ARATH;	3-oxoacyl-[acyl-carrier-protein] synthase I, chloroplastic OS=Arabidopsis thaliana OX=3702 GN=KAS1 PE=1 SV=2;	------	------	------
gene_Solyc02g030300.3	Solyc02g030300.3	G-type lectin S-receptor-like serine/threonine-protein kinase (AHRD V3.3 *** A0A1U8FGU3_CAPAN)	15.35	13.59	12.66	39.55	13.06	29.89	13.8667	27.5	GO:0006468;GO:0048544;GO:0016021;GO:0016020;GO:0005886;GO:0030246;GO:0004674;GO:0005524;GO:0004672;GO:0106310;GO:010631	BP:protein phosphorylation;BP:recognition of pollen;CC:integral component of membrane;CC:membrane;CC:plasma membrane;MF:carbohydrate binding;MF:protein serine/threonine kinase activity;MF:ATP binding;MF:protein kinase activity;MF:old GO;MF:old GO;	------	------	------	------	COG0515	T:Signal transduction mechanisms	XP_004231576.1	G-type lectin S-receptor-like serine/threonine-protein kinase At4g27290 [Solanum lycopersicum]	sp|O81832|Y4729_ARATH;	G-type lectin S-receptor-like serine/threonine-protein kinase At4g27290 OS=Arabidopsis thaliana OX=3702 GN=At4g27290 PE=3 SV=4;	PF07714.19;PF00069.27;PF01453.26;PF00954.22;PF08276.13;PF11883.10	PK_Tyr_Ser-Thr;Pkinase;B_lectin;S_locus_glycop;PAN_2;DUF3403	Protein tyrosine and serine/threonine kinase;Protein kinase domain;D-mannose binding lectin;S-locus glycoprotein domain;PAN-like domain;Domain of unknown function
gene_Solyc02g033060.3	Solyc02g033060.3	vacuolar acid trehalase (AHRD V3.3 *** AT3G10405.1)	9.91	17.31	21.23	37.33	33.67	41.12	16.15	37.3733	------	------	------	------	------	------	ENOG4112CHG	S:Function unknown	XP_004231695.1	uncharacterized protein LOC101250461 [Solanum lycopersicum]	------	------	PF12646.9	DUF3783	Domain of unknown function
gene_Solyc02g062490.4	Solyc02g062490.4	2-oxoglutarate (2OG) and Fe(II)-dependent oxygenase superfamily protein (AHRD V3.3 *** A0A2U1LXD5_ARTAN)	2.11	1.71	2.65	3.46	5.55	4.95	2.15667	4.65333	GO:0055114;GO:0031418;GO:0046872;GO:0051213;GO:001649	BP:oxidation-reduction process;MF:L-ascorbic acid binding;MF:metal ion binding;MF:dioxygenase activity;MF:oxidoreductase activity;	------	------	------	------	COG3491	S:Function unknown	XP_004233542.1	probable 2-oxoglutarate-dependent dioxygenase AOP1 [Solanum lycopersicum]	sp|Q945B6|AOP1L_ARATH;	Probable 2-oxoglutarate-dependent dioxygenase AOP1.2 OS=Arabidopsis thaliana OX=3702 GN=AOP1.2 PE=2 SV=1;	PF03171.22;PF14226.8	2OG-FeII_Oxy;DIOX_N	2OG-F;non-haem dioxygenase in morphine synthesis N-terminal
gene_Solyc02g062890.3	Solyc02g062890.3	polyol monosaccharide transporter 5	3.09	5.11	4.96	10.51	6.28	12.13	4.38667	9.64	GO:0006817;GO:0055085;GO:0016021;GO:002285	BP:phosphate ion transport;BP:transmembrane transport;CC:integral component of membrane;MF:transmembrane transporter activity;	------	------	------	------	ENOG410XNQK	G:Carbohydrate transport and metabolism	NP_001289849.1	probable polyol transporter 6 [Solanum lycopersicum]	sp|Q8GXR2|PLT6_ARATH;	Probable polyol transporter 6 OS=Arabidopsis thaliana OX=3702 GN=PLT6 PE=2 SV=2;	PF00083.26;PF07690.18;PF06609.15	Sugar_tr;MFS_1;TRI12	Sugar;Major Facilitator Superfamily;Fungal trichothecene efflux pump
gene_Solyc02g064620.2	Solyc02g064620.2	ARM repeat superfamily protein (AHRD V3.3 *** A0A2U1MQ52_ARTAN)	3.41	3.31	2.29	4.84	4.77	5.78	3.00333	5.13	GO:0016180;GO:0034472;GO:003203	BP:snRNA processing;BP:snRNA 3'-end processing;CC:integrator complex;	K13144	INTS7	------	------	ENOG410XSMR	S:Function unknown	XP_004233952.1	uncharacterized protein LOC101266905 isoform X1 [Solanum lycopersicum]	sp|Q9NVH2|INT7_HUMAN;	Integrator complex subunit 7 OS=Homo sapiens OX=9606 GN=INTS7 PE=1 SV=1;	------	------	------
gene_Solyc02g065170.3	Solyc02g065170.3	L-ascorbate oxidase-like protein (AHRD V3.3 *** A0A2G3D2Z5_CAPCH)	13.34	20.59	22.45	30.37	34.93	34.09	18.7933	33.13	GO:0055114;GO:0005507;GO:001649	BP:oxidation-reduction process;MF:copper ion binding;MF:oxidoreductase activity;	K19791	FET3_5	------	------	COG2132	Q:Secondary metabolites biosynthesis, transport and catabolism	KAG5621390.1	hypothetical protein H5410_006608 [Solanum commersonii]	sp|Q00624|ASOL_BRANA;	L-ascorbate oxidase homolog OS=Brassica napus OX=3708 GN=Bp10 PE=2 SV=1;	PF00394.24;PF07732.17;PF07731.16	Cu-oxidase;Cu-oxidase_3;Cu-oxidase_2	Multicopper oxidase;Multicopper oxidase;Multicopper oxidase
gene_Solyc02g065430.1	Solyc02g065430.1	HTH-type transcriptional regulator (AHRD V3.3 *** Q680G2_ARATH)	3.7	6.6	6.89	13.42	12.78	20.45	5.73	15.55	------	------	------	------	------	------	ENOG410YR55	S:Function unknown	XP_004233412.1	uncharacterized protein LOC101258031 [Solanum lycopersicum]	------	------	PF14009.8	PADRE	PADRE domain
gene_Solyc02g066920.3	Solyc02g066920.3	Chlororespiratory reduction 7 (AHRD V3.3 *** A0A2U1NIM3_ARTAN)	28.45	52.45	57.34	104.46	94.79	116.04	46.08	105.097	GO:0010275;GO:0009570;GO:001602	BP:NA;CC:chloroplast stroma;CC:membrane;	------	------	------	------	ENOG41100U8	S:Function unknown	XP_004233386.1	protein CHLORORESPIRATORY REDUCTION 7, chloroplastic [Solanum lycopersicum]	sp|Q9FL87|CRR7_ARATH;	Protein CHLORORESPIRATORY REDUCTION 7, chloroplastic OS=Arabidopsis thaliana OX=3702 GN=CRR7 PE=2 SV=1;	PF12095.10	CRR7	Protein CHLORORESPIRATORY REDUCTION 7
gene_Solyc02g068260.3	Solyc02g068260.3	Vacuolar iron transporter-like protein 4 (AHRD V3.3 *** A0A2G3A6A6_CAPAN)	0.76	0	0.36	2.78	2.77	2.12	0.373333	2.55667	GO:0030026;GO:0006880;GO:0016021;GO:0016020;GO:0005381;GO:000538	BP:cellular manganese ion homeostasis;BP:intracellular sequestering of iron ion;CC:integral component of membrane;CC:membrane;MF:iron ion transmembrane transporter activity;MF:manganese ion transmembrane transporter activity;	K22736	VIT	------	------	COG1814	S:Function unknown	XP_010317057.1	vacuolar iron transporter homolog 1-like [Solanum lycopersicum]	sp|Q9LPU9|VITH1_ARATH;	Vacuolar iron transporter homolog 1 OS=Arabidopsis thaliana OX=3702 GN=VTL1 PE=2 SV=1;	PF01988.21	VIT1	VIT family
gene_Solyc02g068660.3	Solyc02g068660.3	wall-associated receptor kinase-like 10 (AHRD V3.3 *** A0A2I4G978_9ROSI)	3.85	4.47	3.38	7.3	5.97	9.09	3.9	7.45333	GO:0006468;GO:0007166;GO:0016021;GO:0005886;GO:0004672;GO:0030247;GO:0004674;GO:000552	BP:protein phosphorylation;BP:cell surface receptor signaling pathway;CC:integral component of membrane;CC:plasma membrane;MF:protein kinase activity;MF:polysaccharide binding;MF:protein serine/threonine kinase activity;MF:ATP binding;	------	------	------	------	COG0515	T:Signal transduction mechanisms	XP_010317039.1	wall-associated receptor kinase-like 1 [Solanum lycopersicum]	sp|Q9S9M5|WAKLA_ARATH;	Wall-associated receptor kinase-like 1 OS=Arabidopsis thaliana OX=3702 GN=WAKL1 PE=2 SV=1;	PF00069.27;PF07714.19;PF13947.8	Pkinase;PK_Tyr_Ser-Thr;GUB_WAK_bind	Protein kinase domain;Protein tyrosine and serine/threonine kinase;Wall-associated receptor kinase galacturonan-binding
gene_Solyc02g070710.3	Solyc02g070710.3	Pentatricopeptide repeat (AHRD V3.3 *** A0A200Q363_9MAGN)	0	0	0	0.44	1.07	0.28	0	0.596667	------	------	------	------	------	------	ENOG410Z7Z7	S:Function unknown	XP_004233109.1	pentatricopeptide repeat-containing protein At3g20730 [Solanum lycopersicum]	sp|Q9LT48|PP244_ARATH;	Pentatricopeptide repeat-containing protein At3g20730 OS=Arabidopsis thaliana OX=3702 GN=PCMP-E94 PE=2 SV=1;	PF13041.8;PF01535.22;PF13812.8;PF12854.9;PF17177.6	PPR_2;PPR;PPR_3;PPR_1;PPR_long	PPR repeat family;PPR repeat;Pentatricopeptide repeat domain;PPR repeat;Pentacotripeptide-repeat region of PRORP
gene_Solyc02g071010.1	Solyc02g071010.1	Chlorophyll a-b binding protein, chloroplastic (AHRD V3.3 *** A0A2G3A7J8_CAPAN)	548.59	972.04	993.07	1386.2	2334.58	1906.29	837.9	1875.69	GO:0018298;GO:0009765;GO:0009768;GO:0009416;GO:0009535;GO:0009941;GO:0009522;GO:0009523;GO:0016021;GO:0010287;GO:0016168;GO:004687	BP:protein-chromophore linkage;BP:photosynthesis, light harvesting;BP:photosynthesis, light harvesting in photosystem I;BP:response to light stimulus;CC:chloroplast thylakoid membrane;CC:chloroplast envelope;CC:photosystem I;CC:photosystem II;CC:integral component of membrane;CC:plastoglobule;MF:chlorophyll binding;MF:metal ion binding;	K08912	LHCB1	map00196	Photosynthesis - antenna proteins	ENOG410ZHBU	J:Translation, ribosomal structure and biogenesis	NP_001316856.1	chlorophyll a-b binding protein 1B, chloroplastic [Solanum lycopersicum]	sp|P07370|CB2B_SOLLC;	Chlorophyll a-b binding protein 1B, chloroplastic OS=Solanum lycopersicum OX=4081 GN=CAB1B PE=3 SV=1;	PF00504.23	Chloroa_b-bind	Chlorophyll A-B binding protein
gene_Solyc02g071470.5	Solyc02g071470.5	2-oxoglutarate (2OG) and Fe(II)-dependent oxygenase superfamily protein (AHRD V3.11 *** tr|Q9SB33|Q9SB33_ARATH)	0.94	1.89	0.32	4.61	1.64	2.88	1.05	3.04333	GO:0032259;GO:0031418;GO:0051213;GO:0008168;GO:0046872;GO:001649	BP:methylation;MF:L-ascorbic acid binding;MF:dioxygenase activity;MF:methyltransferase activity;MF:metal ion binding;MF:oxidoreductase activity;	------	------	------	------	COG3491	S:Function unknown	NP_001352380.1	protein SRG1-like [Solanum lycopersicum]	sp|Q39224|SRG1_ARATH;	Protein SRG1 OS=Arabidopsis thaliana OX=3702 GN=SRG1 PE=2 SV=1;	PF14226.8;PF03171.22	DIOX_N;2OG-FeII_Oxy	non-haem dioxygenase in morphine synthesis N-terminal;2OG-F
gene_Solyc02g078390.3	Solyc02g078390.3	DNA mismatch repair protein MutS (AHRD V3.3 *** A0A200PQX6_9MAGN)	9.1	9.37	10.4	16.9	18.38	23.32	9.62333	19.5333	GO:0006298;GO:0045910;GO:0005634;GO:0032300;GO:0008094;GO:0004519;GO:0030983;GO:0016887;GO:000552	BP:mismatch repair;BP:negative regulation of DNA recombination;CC:nucleus;CC:mismatch repair complex;MF:DNA-dependent ATPase activity;MF:endonuclease activity;MF:mismatched DNA binding;MF:ATPase activity;MF:ATP binding;	K07456	mutS2	map03430	Mismatch repair	COG1193	L:Replication, recombination and repair	XP_004232862.1	uncharacterized protein LOC101246010 [Solanum lycopersicum]	sp|P73625|MUTS2_SYNY3;	Endonuclease MutS2 OS=Synechocystis sp.;	PF00488.23;PF01713.23	MutS_V;Smr	MutS domain V;Smr domain
gene_Solyc02g078500.2	Solyc02g078500.2	Aluminum induced protein with YGL and LRDR motifs (AHRD V3.3 *** Q9FG81_ARATH)	2.32	3.25	4.28	6.99	7.21	7.69	3.28333	7.29667	GO:001602	CC:integral component of membrane;	------	------	------	------	ENOG410YD56	S:Function unknown	XP_004232850.1	stem-specific protein TSJT1-like isoform X3 [Solanum lycopersicum]	sp|P24805|TSJT1_TOBAC;	Stem-specific protein TSJT1 OS=Nicotiana tabacum OX=4097 GN=TSJT1 PE=2 SV=1;	PF12481.10	DUF3700	Aluminium induced protein
gene_Solyc02g078620.1	Solyc02g078620.1	Dof zinc finger protein DOF5.3 (AHRD V3.3 *** A0A2G3D6D4_CAPCH)	0.74	1.05	1.44	4.09	3.47	5.9	1.07667	4.48667	GO:0006355;GO:0005634;GO:000367	BP:regulation of transcription, DNA-templated;CC:nucleus;MF:DNA binding;	------	------	------	------	ENOG410YN5P	S:Function unknown	TMX02247.1	hypothetical protein EJD97_022253 [Solanum chilense]	sp|Q94AR6|DOF31_ARATH;	Dof zinc finger protein DOF3.1 OS=Arabidopsis thaliana OX=3702 GN=DOF3.1 PE=2 SV=2;	PF02701.17	zf-Dof	Dof domain, zinc finger
gene_Solyc02g079440.3	Solyc02g079440.3	FAD-binding Berberine family protein (AHRD V3.3 *** A0A2U1MQE5_ARTAN)	0.08	0.04	0.19	0.51	0.18	1.08	0.103333	0.59	GO:0055114;GO:0050660;GO:0071949;GO:001649	BP:oxidation-reduction process;MF:flavin adenine dinucleotide binding;MF:FAD binding;MF:oxidoreductase activity;	------	------	------	------	COG0277	C:Energy production and conversion	XP_004232774.1	berberine bridge enzyme-like 22 [Solanum lycopersicum]	sp|Q9SUC6|BBE22_ARATH;	Berberine bridge enzyme-like 22 OS=Arabidopsis thaliana OX=3702 GN=FAD-OXR PE=2 SV=1;	PF01565.25;PF08031.14	FAD_binding_4;BBE	FAD binding domain;Berberine and berberine like
gene_Solyc02g079980.3	Solyc02g079980.3	Sulfite exporter TauE/SafE family protein 2 (AHRD V3.3 *** TAUE2_ARATH)	4.61	6.04	3.55	9.76	11.23	11.35	4.73333	10.78	GO:0016567;GO:0016021;GO:003146	BP:protein ubiquitination;CC:integral component of membrane;CC:Cul4A-RING E3 ubiquitin ligase complex;	------	------	------	------	ENOG4111QQH	S:Function unknown	XP_004232753.1	sulfite exporter TauE/SafE family protein 5 isoform X2 [Solanum lycopersicum]	sp|Q9SYB0|TAUE2_ARATH;	Sulfite exporter TauE/SafE family protein 2 OS=Arabidopsis thaliana OX=3702 GN=At1g61740 PE=2 SV=1;	PF01925.21	TauE	Sulfite exporter TauE/SafE
gene_Solyc02g083310.3	Solyc02g083310.3	Bifunctional nuclease 2 (AHRD V3.3 *** A0A1J3GME9_NOCCA)	58.86	68.14	53.27	100.53	143.72	85.9	60.09	110.05	GO:0016567;GO:0005634;GO:0030891;GO:000451	BP:protein ubiquitination;CC:nucleus;CC:VCB complex;MF:nuclease activity;	K08999	K08999	------	------	ENOG410YEHB	S:Function unknown	XP_004232531.1	bifunctional nuclease 2 [Solanum lycopersicum]	sp|Q6YZM6|BBD2_ORYSJ;	Bifunctional nuclease 2 OS=Oryza sativa subsp. japonica OX=39947 GN=BBD2 PE=2 SV=1;	PF02577.16;PF02151.21	DUF151;UVR	Domain of unknown function;UvrB/uvrC motif
gene_Solyc02g083850.3	Solyc02g083850.3	Calcium-dependent kinase (AHRD V3.3 *** Q5D875_MEDTR)	4.03	3.29	2.49	8.65	8.46	4.98	3.27	7.36333	GO:0018105;GO:0035556;GO:0046777;GO:0005737;GO:0005634;GO:0004683;GO:0009931;GO:0005509;GO:0004672;GO:0005524;GO:000551	BP:peptidyl-serine phosphorylation;BP:intracellular signal transduction;BP:protein autophosphorylation;CC:cytoplasm;CC:nucleus;MF:calmodulin-dependent protein kinase activity;MF:calcium-dependent protein serine/threonine kinase activity;MF:calcium ion binding;MF:protein kinase activity;MF:ATP binding;MF:calmodulin binding;	K13412	CPK	map04626	Plant-pathogen interaction	ENOG410XRMJ	T:Signal transduction mechanisms	XP_004232492.1	calcium-dependent protein kinase 18-like [Solanum lycopersicum]	sp|Q9FKW4|CDPKS_ARATH;	Calcium-dependent protein kinase 28 OS=Arabidopsis thaliana OX=3702 GN=CPK28 PE=1 SV=1;	PF00069.27;PF07714.19;PF00036.34;PF13202.8;PF13499.8;PF13405.8;PF13833.8;PF10591.11;PF14531.8;PF06293.16;PF03109.18	Pkinase;PK_Tyr_Ser-Thr;EF-hand_1;EF-hand_5;EF-hand_7;EF-hand_6;EF-hand_8;SPARC_Ca_bdg;Kinase-like;Kdo;ABC1	Protein kinase domain;Protein tyrosine and serine/threonine kinase;EF hand;EF hand;EF-hand domain pair;EF-hand domain;EF-hand domain pair;Secreted protein acidic and rich in cysteine Ca binding region;Kinase-like;Lipopolysaccharide kinase;ABC1 atypical kinase-like domain
gene_Solyc02g085760.2	Solyc02g085760.2	Rhomboid domain-containing protein (AHRD V3.3 *** A0A1Q3C608_CEPFO)	62.61	105.55	76.55	152.78	140.99	179.25	81.57	157.673	GO:0010821;GO:0016021;GO:0005743;GO:000425	BP:regulation of mitochondrion organization;CC:integral component of membrane;CC:mitochondrial inner membrane;MF:serine-type endopeptidase activity;	------	------	------	------	COG0705	S:Function unknown	XP_004232374.1	RHOMBOID-like protein 9, chloroplastic [Solanum lycopersicum]	sp|Q9FFX0|RBL9_ARATH;	RHOMBOID-like protein 9, chloroplastic OS=Arabidopsis thaliana OX=3702 GN=RBL9 PE=2 SV=1;	PF01694.24	Rhomboid	Rhomboid family
gene_Solyc02g086210.4	Solyc02g086210.4	Protein kinase family protein (AHRD V3.3 *-* A0A2U1MH78_ARTAN)	5.61	4.81	4.38	14.97	10.9	11.05	4.93333	12.3067	GO:0016021;GO:0030247;GO:0005524;GO:000467	CC:integral component of membrane;MF:polysaccharide binding;MF:ATP binding;MF:protein kinase activity;	------	------	------	------	COG0515	T:Signal transduction mechanisms	XP_004232341.1	LEAF RUST 10 DISEASE-RESISTANCE LOCUS RECEPTOR-LIKE PROTEIN KINASE-like 2.1 isoform X1 [Solanum lycopersicum]	sp|Q9FF31|LRL21_ARATH;	LEAF RUST 10 DISEASE-RESISTANCE LOCUS RECEPTOR-LIKE PROTEIN KINASE-like 2.1 OS=Arabidopsis thaliana OX=3702 GN=LRK10L-2.1 PE=3 SV=1;	PF13947.8;PF14380.8	GUB_WAK_bind;WAK_assoc	Wall-associated receptor kinase galacturonan-binding;Wall-associated receptor kinase C-terminal
gene_Solyc02g088090.1	Solyc02g088090.1	Calmodulin-like protein 45 (AHRD V3.3 *** A0A2P0QD45_CAMSI)	50.23	52.87	38.62	117.25	173.02	70.96	47.24	120.41	GO:0016021;GO:000550	CC:integral component of membrane;MF:calcium ion binding;	K02183	CALM	map04626;map04070;map04016	Plant-pathogen interaction;Phosphatidylinositol signaling system;MAPK signaling pathway - plant	COG5126;COG5126;COG5126	D:Cell cycle control, cell division, chromosome partitioning;T:Signal transduction mechanisms;Z:Cytoskeleton	XP_004232216.1	probable calcium-binding protein CML30 [Solanum lycopersicum]	sp|Q9MBG5|CML45_ARATH;	Probable calcium-binding protein CML45 OS=Arabidopsis thaliana OX=3702 GN=CML45 PE=2 SV=1;	PF00036.34;PF13405.8;PF13202.8;PF13499.8;PF13833.8;PF00404.20	EF-hand_1;EF-hand_6;EF-hand_5;EF-hand_7;EF-hand_8;Dockerin_1	EF hand;EF-hand domain;EF hand;EF-hand domain pair;EF-hand domain pair;Dockerin type I domain
gene_Solyc02g089520.2	Solyc02g089520.2	Zinc finger protein CONSTANS-LIKE 2 (AHRD V3.3 *** A0A2G3ABV8_CAPAN)	1.54	3.69	1.7	4.76	7.2	8.52	2.31	6.82667	GO:0009909;GO:0005634;GO:0008270;GO:000551	BP:regulation of flower development;CC:nucleus;MF:zinc ion binding;MF:protein binding;	------	------	------	------	COG5641	K:Transcription	NP_001316711.1	CONSTANS 3 [Solanum lycopersicum]	sp|Q96502|COL2_ARATH;	Zinc finger protein CONSTANS-LIKE 2 OS=Arabidopsis thaliana OX=3702 GN=COL2 PE=1 SV=1;	PF06203.16;PF00643.26	CCT;zf-B_box	CCT motif;B-box zinc finger
gene_Solyc02g091080.2	Solyc02g091080.2	Protein DETOXIFICATION (AHRD V3.3 *** A0A2I4FHE6_9ROSI)	0.46	0.41	0.44	1.04	0.98	1.56	0.436667	1.19333	GO:0006855;GO:0055085;GO:0016021;GO:0016020;GO:0015297;GO:0015238;GO:004291	BP:drug transmembrane transport;BP:transmembrane transport;CC:integral component of membrane;CC:membrane;MF:antiporter activity;MF:drug transmembrane transporter activity;MF:xenobiotic transporter activity;	K03327	TC.MATE, SLC47A, norM, mdtK, dinF	------	------	COG0534	V:Defense mechanisms	XP_025885468.1	protein DETOXIFICATION 1-like [Solanum lycopersicum]	sp|Q9SIA5|DTX1_ARATH;	Protein DETOXIFICATION 1 OS=Arabidopsis thaliana OX=3702 GN=DTX1 PE=2 SV=1;	PF01554.20	MatE	MatE
gene_Solyc02g091300.3	Solyc02g091300.3	Heavy metal-associated isoprenylated plant protein (AHRD V3.3 *** A0A2R6PA46_ACTCH)	1.75	2.28	2.28	5.74	2.9	5.22	2.10333	4.62	GO:0030001;GO:004687	BP:metal ion transport;MF:metal ion binding;	------	------	------	------	COG2608	S:Function unknown	XP_004232003.1	heavy metal-associated isoprenylated plant protein 21 [Solanum lycopersicum]	sp|Q9LF57|HIP21_ARATH;	Heavy metal-associated isoprenylated plant protein 21 OS=Arabidopsis thaliana OX=3702 GN=HIPP21 PE=1 SV=1;	PF00403.28	HMA	Heavy-metal-associated domain
gene_Solyc02g092580.3	Solyc02g092580.3	Peroxidase (AHRD V3.3 *** K4BD54_SOLLC)	8.33	7.49	4.21	15.83	12.17	17.27	6.67667	15.09	GO:0006979;GO:0042744;GO:0055114;GO:0005576;GO:0020037;GO:0046872;GO:000460	BP:response to oxidative stress;BP:hydrogen peroxide catabolic process;BP:oxidation-reduction process;CC:extracellular region;MF:heme binding;MF:metal ion binding;MF:peroxidase activity;	K00430	E1.11.1.7	map00940	Phenylpropanoid biosynthesis	ENOG4111FDS	G:Carbohydrate transport and metabolism	XP_004231908.1	peroxidase 51 [Solanum lycopersicum]	sp|Q9SZE7|PER51_ARATH;	Peroxidase 51 OS=Arabidopsis thaliana OX=3702 GN=PER51 PE=2 SV=1;	PF00141.25	peroxidase	Peroxidase
gene_Solyc02g093580.5	Solyc02g093580.5	Pectate lyase (AHRD V3.11 *** tr|A0A2G2XIT4|A0A2G2XIT4_CAPBA)	1.56	1.69	1.55	2.74	2.89	4.2	1.6	3.27667	GO:0045490;GO:0005618;GO:0005576;GO:0030570;GO:004687	BP:pectin catabolic process;CC:cell wall;CC:extracellular region;MF:pectate lyase activity;MF:metal ion binding;	K01728	pel	map00040	Pentose and glucuronate interconversions	COG3866	G:Carbohydrate transport and metabolism	NP_001234029.2	probable pectate lyase P18 precursor [Solanum lycopersicum]	sp|P24396|PLY18_SOLLC;	Probable pectate lyase P18 OS=Solanum lycopersicum OX=4081 GN=9612 PE=2 SV=1;	PF00544.21;PF13229.8	Pectate_lyase_4;Beta_helix	Pectate lyase;Right handed beta helix region
gene_Solyc02g094050.5	Solyc02g094050.5	Blue copper protein (AHRD V3.11 *** tr|A0A2K3LS79|A0A2K3LS79_TRIPR)	6.48	6.09	4.92	10.51	14.8	11.41	5.83	12.24	GO:0006821;GO:0043231;GO:0016021;GO:0009705;GO:0009671;GO:000524	BP:chloride transport;CC:intracellular membrane-bounded organelle;CC:integral component of membrane;CC:plant-type vacuole membrane;MF:nitrat;MF:voltage-gated chloride channel activity;	K05016	CLCN7	------	------	COG0038	P:Inorganic ion transport and metabolism	XP_004231786.1	chloride channel protein CLC-a-like [Solanum lycopersicum]	sp|P92941|CLCA_ARATH;	Chloride channel protein CLC-a OS=Arabidopsis thaliana OX=3702 GN=CLC-A PE=1 SV=2;	PF02298.19	Cu_bind_like	Plastocyanin-like domain
gene_Solyc02g150100.1	Solyc02g150100.1	Unknown protein	0.62	0.6	0.42	1.36	1.28	2.53	0.546667	1.72333	------	------	------	------	------	------	------	------	------	------	------	------	------	------	------
gene_Solyc03g005450.3	Solyc03g005450.3	Cellulose synthase (AHRD V3.3 *** A0A200Q4F9_9MAGN)	20.02	22.51	18.78	49.72	50.75	56.37	20.4367	52.28	GO:0009833;GO:0030244;GO:0016020;GO:0016021;GO:0005802;GO:0005886;GO:0051753;GO:001676	BP:plant-type primary cell wall biogenesis;BP:cellulose biosynthetic process;CC:membrane;CC:integral component of membrane;CC:trans-Golgi network;CC:plasma membrane;MF:mannan synthase activity;MF:cellulose synthas;	------	------	------	------	COG1215	M:Cell wall/membrane/envelope biogenesis	XP_004234035.1	cellulose synthase-like protein G2 [Solanum lycopersicum]	sp|Q8VYR4|CSLG2_ARATH;	Cellulose synthase-like protein G2 OS=Arabidopsis thaliana OX=3702 GN=CSLG2 PE=2 SV=1;	PF03552.16	Cellulose_synt	Cellulose synthase
gene_Solyc03g006210.2	Solyc03g006210.2	Cysteine protease-like protein (AHRD V3.3 *** Q9SG15_ARATH)	0.23	0.28	0.08	1.53	1.58	0.72	0.196667	1.27667	GO:0051603;GO:0006508;GO:0005615;GO:0005764;GO:0004197;GO:000823	BP:proteolysis involved in cellular protein catabolic process;BP:proteolysis;CC:extracellular space;CC:lysosome;MF:cysteine-type endopeptidase activity;MF:cysteine-type peptidase activity;	------	------	------	------	COG4870	O:Posttranslational modification, protein turnover, chaperones	XP_004234254.1	zingipain-2-like [Solanum lycopersicum]	sp|Q7XWK5|SAG39_ORYSJ;	Senescence-specific cysteine protease SAG39 OS=Oryza sativa subsp. japonica OX=39947 GN=SAG39 PE=2 SV=2;	PF00112.25;PF08246.14;PF03051.17	Peptidase_C1;Inhibitor_I29;Peptidase_C1_2	Papain family cysteine protease;Cathepsin propeptide inhibitor domain;Peptidase C1-like family
gene_Solyc03g007220.3	Solyc03g007220.3	Membrane receptor-like protein.1	35.52	48.98	60.84	170.89	125.6	133.86	48.4467	143.45	GO:0016021;GO:003024	CC:integral component of membrane;MF:polysaccharide binding;	------	------	------	------	------	------	KAG5617204.1	hypothetical protein H5410_017028 [Solanum commersonii]	------	------	------	------	------
gene_Solyc03g013160.5	Solyc03g013160.5	Amino acid transporter (AHRD V3.11 *** tr|A0A200QES2|A0A200QES2_9MAGN)	16.34	17.04	12.62	46.26	74.72	32.51	15.3333	51.1633	GO:0006865;GO:0005774;GO:0016021;GO:000588	BP:amino acid transport;CC:vacuolar membrane;CC:integral component of membrane;CC:plasma membrane;	K15015	SLC32A, VGAT	------	------	COG0814	E:Amino acid transport and metabolism	XP_004234290.1	amino acid transporter AVT1I [Solanum lycopersicum]	sp|Q9LXF8|AVT1J_ARATH;	Amino acid transporter AVT1J OS=Arabidopsis thaliana OX=3702 GN=AVT1J PE=2 SV=1;	PF01490.20	Aa_trans	Transmembrane amino acid transporter protein
gene_Solyc03g025430.1	Solyc03g025430.1	Transmembrane protein (AHRD V3.3 *** Q9FHB8_ARATH)	4.92	8.51	10.23	15.21	16.21	26.73	7.88667	19.3833	GO:0016021;GO:001602	CC:integral component of membrane;CC:membrane;	------	------	------	------	ENOG410YIUI	S:Function unknown	XP_004234413.1	uncharacterized protein LOC101256847 [Solanum lycopersicum]	------	------	------	------	------
gene_Solyc03g043700.3	Solyc03g043700.3	U-box domain-containing protein 4-like (AHRD V3.3 *** A0A2I4HV32_9ROSI)	1.96	1.11	0.76	4.64	4.21	4.21	1.27667	4.35333	GO:0005737;GO:0005634;GO:000551	CC:cytoplasm;CC:nucleus;MF:protein binding;	------	------	------	------	ENOG410XRTN	S:Function unknown	XP_004234710.1	U-box domain-containing protein 4-like isoform X1 [Solanum lycopersicum]	sp|Q9C7G1|PUB45_ARATH;	U-box domain-containing protein 45 OS=Arabidopsis thaliana OX=3702 GN=PUB45 PE=1 SV=1;	PF00514.25;PF04826.15	Arm;Arm_2	Armadillo/beta-catenin-like repeat;Armadillo-like
gene_Solyc03g044220.1	Solyc03g044220.1	F-box protein (AHRD V3.3 *** A0A2G2XGV7_CAPBA)	7.9	8.13	5.99	13.83	15.08	12.77	7.34	13.8933	GO:0031146;GO:0019005;GO:000551	BP:SCF-dependent proteasomal ubiquitin-dependent protein catabolic process;CC:SCF ubiquitin ligase complex;MF:protein binding;	------	------	------	------	ENOG410XQ54;ENOG410ZNMR	S:Function unknown;	XP_004234661.1	F-box protein SKIP2-like [Solanum lycopersicum]	sp|Q9FE83|SKIP2_ARATH;	F-box protein SKIP2 OS=Arabidopsis thaliana OX=3702 GN=SKIP2 PE=1 SV=1;	PF12937.9;PF00646.35;PF18511.3	F-box-like;F-box;F-box_5	F-box-like;F-box domain;F-box
gene_Solyc03g044740.5	Solyc03g044740.5	Methyl esterase 1 (AHRD V3.11 *** tr|A0A2U1LMY0|A0A2U1LMY0_ARTAN)	23.71	21.19	19.44	42.91	35.46	47.31	21.4467	41.8933	GO:0009694;GO:0009696;GO:0080032;GO:0080031;GO:008003	BP:jasmonic acid metabolic process;BP:salicylic acid metabolic process;MF:methyl jasmonate esterase activity;MF:methyl salicylate esterase activity;MF:methyl indole-3-acetate esterase activity;	------	------	------	------	ENOG4111IVV	S:Function unknown	NP_001309257.1	methylesterase 10 [Solanum lycopersicum]	sp|Q8S9K8|MES10_ARATH;	Methylesterase 10 OS=Arabidopsis thaliana OX=3702 GN=MES10 PE=2 SV=1;	PF00561.22;PF12697.9;PF12146.10	Abhydrolase_1;Abhydrolase_6;Hydrolase_4	alpha/beta hydrolase fold;Alpha/beta hydrolase family;Serine aminopeptidase, S33
gene_Solyc03g058160.4	Solyc03g058160.4	Zinc finger protein (AHRD V3.11 *** tr|A0A200RDC0|A0A200RDC0_9MAGN)	8.03	10.94	14.2	31.92	15.15	26.63	11.0567	24.5667	GO:0010090;GO:0009739;GO:000370	BP:trichome morphogenesis;BP:response to gibberellin;MF:transcription factor activity, sequence-specific DNA binding;	------	------	------	------	ENOG410YP3T	S:Function unknown	XP_010317870.1	zinc finger protein 8 [Solanum lycopersicum]	sp|Q84WI0|GIS_ARATH;	Zinc finger protein GIS OS=Arabidopsis thaliana OX=3702 GN=GIS PE=1 SV=1;	PF13912.8	zf-C2H2_6	C2H2-type zinc finger
gene_Solyc03g080100.4	Solyc03g080100.4	Heavy metal-associated isoprenylated plant protein (AHRD V3.3 *** A0A2R6RSC8_ACTCH)	2.15	3.79	2.53	10.43	11.46	7.46	2.82333	9.78333	GO:0030001;GO:004687	BP:metal ion transport;MF:metal ion binding;	------	------	------	------	COG2608	S:Function unknown	XP_004235034.1	heavy metal-associated isoprenylated plant protein 9-like [Solanum lycopersicum]	sp|Q9FLU5|HIP9_ARATH;	Heavy metal-associated isoprenylated plant protein 9 OS=Arabidopsis thaliana OX=3702 GN=HIPP09 PE=2 SV=1;	PF00403.28;PF19803.1	HMA;DUF6286	Heavy-metal-associated domain;Family of unknown function
gene_Solyc03g097320.3	Solyc03g097320.3	RNA polymerase sigma factor sigA (AHRD V3.3 *** A0A2G2VB29_CAPBA)	9.29	10.59	9.34	19.07	12.7	20.68	9.74	17.4833	GO:0006355;GO:0006352;GO:0003700;GO:0016987;GO:000367	BP:regulation of transcription, DNA-templated;BP:DNA-templated transcription, initiation;MF:transcription factor activity, sequence-specific DNA binding;MF:sigma factor activity;MF:DNA binding;	K03086	rpoD	------	------	COG0568	K:Transcription	XP_004235299.1	RNA polymerase sigma factor sigA [Solanum lycopersicum]	sp|O24629|SIGA_ARATH;	RNA polymerase sigma factor sigA OS=Arabidopsis thaliana OX=3702 GN=SIGA PE=1 SV=1;	PF04539.18;PF04542.16;PF04545.18	Sigma70_r3;Sigma70_r2;Sigma70_r4	Sigma-70 region 3;Sigma-70 region 2;Sigma-70, region 4
gene_Solyc03g097960.1	Solyc03g097960.1	Cysteine/Histidine-rich .1	0.76	0.93	0.86	3.35	1.88	2.65	0.85	2.62667	------	------	------	------	------	------	ENOG410YY12	S:Function unknown	XP_010318329.1	uncharacterized protein LOC101264193 [Solanum lycopersicum]	sp|Q7Y0F2|NRX12_ORYSJ;	Probable nucleoredoxin 1-2 OS=Oryza sativa subsp. japonica OX=39947 GN=Os03g0405900 PE=2 SV=1;	PF03107.18;PF00628.31;PF00130.24	C1_2;PHD;C1_1	C1 domain;PHD-finger;Phorbol esters/diacylglycerol binding domain
gene_Solyc03g098175.1	Solyc03g098175.1	SNF2 domain-containing protein CLASSY 4 (AHRD V3.3 *-* A0A1J3D544_NOCCA)	1.22	1.19	3.84	4.78	4.57	5.92	2.08333	5.09	GO:0080188;GO:0070615;GO:000552	BP:RNA-directed DNA methylation;MF:nucleosome-dependent ATPase activity;MF:ATP binding;	K10875	RAD54L, RAD54	map03440	Homologous recombination	COG0553	L:Replication, recombination and repair	KAG5592698.1	hypothetical protein H5410_043212 [Solanum commersonii]	sp|Q9LK10|CLSY4_ARATH;	SNF2 domain-containing protein CLASSY 4 OS=Arabidopsis thaliana OX=3702 GN=CLSY4 PE=1 SV=1;	------	------	------
gene_Solyc03g098740.1	Solyc03g098740.1	Biotic cell death-associated protein (AHRD V3.3 *** Q850R9_NICGU)	2.75	1.79	1.4	19.11	2.84	4.92	1.98	8.95667	GO:000486	MF:endopeptidase inhibitor activity;	------	------	------	------	ENOG410YHN1	O:Posttranslational modification, protein turnover, chaperones	XP_004235492.2	kunitz trypsin inhibitor 2-like [Solanum lycopersicum]	sp|P32765|ASP_THECC;	21 kDa seed protein OS=Theobroma cacao OX=3641 GN=ASP PE=2 SV=1;	PF00197.20	Kunitz_legume	Trypsin and protease inhibitor
gene_Solyc03g111540.2	Solyc03g111540.2	G-type lectin S-receptor-like serine/threonine-protein kinase (AHRD V3.3 *** A0A2G2X8E7_CAPBA)	0.3	0.36	0.35	1.38	0.62	1.29	0.336667	1.09667	GO:0006468;GO:0016021;GO:0005739;GO:0005886;GO:0004672;GO:0004674;GO:000552	BP:protein phosphorylation;CC:integral component of membrane;CC:mitochondrion;CC:plasma membrane;MF:protein kinase activity;MF:protein serine/threonine kinase activity;MF:ATP binding;	------	------	------	------	COG0515	T:Signal transduction mechanisms	XP_004236550.1	putative receptor-like protein kinase At4g00960 [Solanum lycopersicum]	sp|Q9M0X5|CRK25_ARATH;	Cysteine-rich receptor-like protein kinase 25 OS=Arabidopsis thaliana OX=3702 GN=CRK25 PE=3 SV=1;	PF07714.19;PF00069.27;PF01657.19;PF11883.10;PF17667.3	PK_Tyr_Ser-Thr;Pkinase;Stress-antifung;DUF3403;Pkinase_fungal	Protein tyrosine and serine/threonine kinase;Protein kinase domain;Salt stress response/antifungal;Domain of unknown function;Fungal protein kinase
gene_Solyc03g111940.2	Solyc03g111940.2	Cytochrome P450 71A6 (AHRD V3.3 *** A0A2G2ZZC6_CAPAN)	2.26	4.16	6.62	8.71	7.42	8.58	4.34667	8.23667	GO:0055114;GO:0016021;GO:0004497;GO:0020037;GO:0016705;GO:000550	BP:oxidation-reduction process;CC:integral component of membrane;MF:monooxygenase activity;MF:heme binding;MF:oxidoreductase activity, acting on paired donors, with incorporation or reduction of molecular oxygen;MF:iron ion binding;	------	------	------	------	COG2124	Q:Secondary metabolites biosynthesis, transport and catabolism	XP_004236284.1	cytochrome P450 71A4-like [Solanum lycopersicum]	sp|P37117|C71A4_SOLME;	Cytochrome P450 71A4 OS=Solanum melongena OX=4111 GN=CYP71A4 PE=2 SV=1;	PF00067.24	p450	Cytochrome P450
gene_Solyc03g113890.1	Solyc03g113890.1	Zinc finger protein GIS (AHRD V3.3 *** A0A2G3AWD2_CAPCH)	0	0	0	0.76	0.06	1.2	0	0.673333	GO:0009736;GO:0009740;GO:0010090;GO:0010026;GO:0005634;GO:0003700;GO:000097	BP:cytokinin-activated signaling pathway;BP:gibberellic acid mediated signaling pathway;BP:trichome morphogenesis;BP:trichome differentiation;CC:nucleus;MF:transcription factor activity, sequence-specific DNA binding;MF:transcription regulatory region sequence-specific DNA binding;	K10773	NTH	map03410	Base excision repair	ENOG4111DHE;ENOG4111AXQ	S:Function unknown;	XP_025885860.1	uncharacterized protein LOC101257456 [Solanum lycopersicum]	sp|Q39264|ZFP5_ARATH;	Zinc finger protein 5 OS=Arabidopsis thaliana OX=3702 GN=ZFP5 PE=1 SV=1;	------	------	------
gene_Solyc03g116890.3	Solyc03g116890.3	WRKY transcription factor 39	18.26	8.93	6.35	30.85	35.12	12.81	11.18	26.26	GO:0006355;GO:0005634;GO:0003700;GO:004356	BP:regulation of transcription, DNA-templated;CC:nucleus;MF:transcription factor activity, sequence-specific DNA binding;MF:sequence-specific DNA binding;	------	------	------	------	ENOG410YHES	K:Transcription	NP_001303844.1	probable WRKY transcription factor 40 [Solanum lycopersicum]	sp|Q9SAH7|WRK40_ARATH;	Probable WRKY transcription factor 40 OS=Arabidopsis thaliana OX=3702 GN=WRKY40 PE=1 SV=1;	PF03106.17	WRKY	WRKY DNA -binding domain
gene_Solyc03g117590.3	Solyc03g117590.3	Chaperone protein DnaJ (AHRD V3.3 *** A0A2G2WQF7_CAPBA)	278.73	398.09	261.49	598.84	616.23	679.14	312.77	631.403	------	------	------	------	------	------	COG0484	O:Posttranslational modification, protein turnover, chaperones	NP_001233835.1	heat shock protein binding protein [Solanum lycopersicum]	sp|Q9SAG8|DNAJ8_ARATH;	Chaperone protein dnaJ 8, chloroplastic OS=Arabidopsis thaliana OX=3702 GN=ATJ8 PE=2 SV=1;	PF00226.33	DnaJ	DnaJ domain
gene_Solyc03g119200.4	Solyc03g119200.4	L-Ala-D/L-amino acid epimerase (AHRD V3.3 *** A0A1U8FVL6_CAPAN)	7.03	6.91	8.4	16.36	10.24	17.96	7.44667	14.8533	GO:0046872;GO:001685	MF:metal ion binding;MF:racemase and epimerase activity, acting on amino acids and derivatives;	------	------	------	------	COG4948	M:Cell wall/membrane/envelope biogenesis	XP_004235785.1	L-Ala-D/L-amino acid epimerase [Solanum lycopersicum]	sp|B9I2J6|AXEP_POPTR;	L-Ala-D/L-amino acid epimerase OS=Populus trichocarpa OX=3694 GN=POPTR_0012s05040g PE=3 SV=2;	PF13378.8;PF02746.18;PF07476.13	MR_MLE_C;MR_MLE_N;MAAL_C	Enolase C-terminal domain-like;Mandelate racemase / muconate lactonizing enzyme, N-terminal domain;Methylaspartate ammonia-lyase C-terminus
gene_Solyc03g119370.2	Solyc03g119370.2	R2R3MYB transcription factor 62	0.42	0.08	0.11	1.71	1.4	0.67	0.203333	1.26	GO:0006355;GO:0005634;GO:0003700;GO:004356	BP:regulation of transcription, DNA-templated;CC:nucleus;MF:transcription factor activity, sequence-specific DNA binding;MF:sequence-specific DNA binding;	K09422	MYBP	------	------	COG5147	K:Transcription	XP_004236420.2	transcription factor MYB62-like [Solanum lycopersicum]	sp|Q9C9G7|MYB62_ARATH;	Transcription factor MYB62 OS=Arabidopsis thaliana OX=3702 GN=MYB62 PE=2 SV=1;	PF00249.33;PF13921.8	Myb_DNA-binding;Myb_DNA-bind_6	Myb-like DNA-binding domain;Myb-like DNA-binding domain
gene_Solyc03g119530.3	Solyc03g119530.3	LOB domain-containing protein .1	3.37	3.12	7.29	10.13	9.9	6.26	4.59333	8.76333	GO:001046	BP:regulation of gene expression;	------	------	------	------	ENOG410YB85	S:Function unknown	XP_004235815.1	LOB domain-containing protein 40 [Solanum lycopersicum]	sp|Q9M886|LBD41_ARATH;	LOB domain-containing protein 41 OS=Arabidopsis thaliana OX=3702 GN=LBD41 PE=2 SV=1;	PF03195.16	LOB	Lateral organ boundaries
gene_Solyc03g120980.4	Solyc03g120980.4	Pleiotropic drug resistance transporter 5 (AHRD V3.11 *** tr|I6XGC6|I6XGC6_NICPL)	19.43	21.3	14.82	32.79	31.8	36.25	18.5167	33.6133	GO:0016021;GO:0042626;GO:000552	CC:integral component of membrane;MF:ATPase activity, coupled to transmembrane movement of substances;MF:ATP binding;	K08711	PDR, CDR1	map02010	ABC transporters	COG0842	V:Defense mechanisms	XP_004235646.1	ABC transporter G family member 36-like [Solanum lycopersicum]	sp|Q9XIE2|AB36G_ARATH;	ABC transporter G family member 36 OS=Arabidopsis thaliana OX=3702 GN=ABCG36 PE=1 SV=1;	PF01061.26;PF00005.29;PF08370.13;PF19055.2;PF14510.8	ABC2_membrane;ABC_tran;PDR_assoc;ABC2_membrane_7;ABC_trans_N	ABC-2 type transporter;ABC transporter;Plant PDR ABC transporter associated;ABC-2 type transporter;ABC-transporter N-terminal
gene_Solyc03g121240.1	Solyc03g121240.1	Transcription factor HEC2 (AHRD V3.3 *** A0A2G2WPZ2_CAPBA)	0.7	0.17	0.12	1.34	1.16	1.38	0.33	1.29333	GO:0005634;GO:0046983;GO:000097	CC:nucleus;MF:protein dimerization activity;MF:transcription regulatory region sequence-specific DNA binding;	------	------	------	------	ENOG410YJMV	S:Function unknown	XP_004235627.1	transcription factor bHLH87 [Solanum lycopersicum]	sp|Q8S3D2|BH087_ARATH;	Transcription factor bHLH87 OS=Arabidopsis thaliana OX=3702 GN=BHLH87 PE=1 SV=1;	PF00010.28	HLH	Helix-loop-helix DNA-binding domain
gene_Solyc04g007380.3	Solyc04g007380.3	Receptor-like protein kinase (AHRD V3.3 *** D3G6F0_CAPAN)	2.27	1.01	0.93	5.53	2.54	4.27	1.40333	4.11333	GO:0006468;GO:0016021;GO:0004674;GO:0005524;GO:000467	BP:protein phosphorylation;CC:integral component of membrane;MF:protein serine/threonine kinase activity;MF:ATP binding;MF:protein kinase activity;	------	------	------	------	COG0515	T:Signal transduction mechanisms	XP_019068792.1	rust resistance kinase Lr10 [Solanum lycopersicum]	sp|Q9FF29|PR5K_ARATH;	PR5-like receptor kinase OS=Arabidopsis thaliana OX=3702 GN=PR5K PE=1 SV=1;	PF00069.27;PF07714.19	Pkinase;PK_Tyr_Ser-Thr	Protein kinase domain;Protein tyrosine and serine/threonine kinase
gene_Solyc04g008260.3	Solyc04g008260.3	Purple acid phosphatase (AHRD V3.3 *** Q6J5M7_SOLTU)	7.14	10.94	10.18	15.34	23.54	14.75	9.42	17.8767	GO:0008198;GO:0008199;GO:0046872;GO:0003993;GO:001678	MF:ferrous iron binding;MF:ferric iron binding;MF:metal ion binding;MF:acid phosphatase activity;MF:hydrolase activity;	K14379	ACP5	map00740	Riboflavin metabolism	COG1409	S:Function unknown	XP_004236915.1	purple acid phosphatase 4 [Solanum lycopersicum]	sp|Q8H129|PPA3_ARATH;	Purple acid phosphatase 3 OS=Arabidopsis thaliana OX=3702 GN=PAP3 PE=2 SV=1;	PF00149.30	Metallophos	Calcineurin-like phosphoesterase
gene_Solyc04g008610.3	Solyc04g008610.3	Histone acetyltransferase HAC12 (AHRD V3.3 *** A0A2G2X9A5_CAPBA)	4.25	4.81	2.49	7.3	5.71	8.16	3.85	7.05667	GO:0006355;GO:0045944;GO:0016573;GO:0005667;GO:0000123;GO:0005634;GO:0001085;GO:0003713;GO:0004402;GO:0003712;GO:0031490;GO:000827	BP:regulation of transcription, DNA-templated;BP:positive regulation of transcription from RNA polymerase II promoter;BP:histone acetylation;CC:transcription factor complex;CC:histone acetyltransferase complex;CC:nucleus;MF:RNA polymerase II transcription factor binding;MF:transcription coactivator activity;MF:histone acetyltransferase activity;MF:transcription cofactor activity;MF:chromatin DNA …	K04498	EP300, CREBBP, KAT3	map03250	Viral life cycle - HIV-1	ENOG410XPJ0	B:Chromatin structure and dynamics	XP_010319365.1	histone acetyltransferase HAC1-like isoform X1 [Solanum lycopersicum]	sp|Q9C5X9|HAC1_ARATH;	Histone acetyltransferase HAC1 OS=Arabidopsis thaliana OX=3702 GN=HAC1 PE=1 SV=2;	PF08214.13;PF02135.18;PF00569.19;PF00628.31	HAT_KAT11;zf-TAZ;ZZ;PHD	Histone acetylation protein;TAZ zinc finger;Zinc finger, ZZ type;PHD-finger
gene_Solyc04g011460.3	Solyc04g011460.3	FYD (AHRD V3.3 *** AT3G12570.4)	1.88	0	0.79	10.41	9.53	10.71	0.89	10.2167	GO:000994	CC:chloroplast envelope;	------	------	------	------	ENOG4110EQU	S:Function unknown	XP_004236751.1	uncharacterized protein LOC101262100 [Solanum lycopersicum]	------	------	------	------	------
gene_Solyc04g011690.5	Solyc04g011690.5	Cytochrome (AHRD V3.11 *** tr|A0A2G3CDZ6|A0A2G3CDZ6_CAPCH)	22.52	25.37	22.95	54.3	36.39	59.14	23.6133	49.9433	GO:0055114;GO:0005506;GO:0016705;GO:0004497;GO:002003	BP:oxidation-reduction process;MF:iron ion binding;MF:oxidoreductase activity, acting on paired donors, with incorporation or reduction of molecular oxygen;MF:monooxygenase activity;MF:heme binding;	K20562	CYP736A	------	------	COG2124	Q:Secondary metabolites biosynthesis, transport and catabolism	XP_004236729.1	cytochrome P450 CYP736A12-like [Solanum lycopersicum]	sp|A0A068Q5V6|C7150_PRUMU;	Cytochrome P450 71AU50 OS=Prunus mume OX=102107 GN=CYP71AU50 PE=2 SV=1;	PF00067.24	p450	Cytochrome P450
gene_Solyc04g025755.2	Solyc04g025755.2	Gag/pol polyprotein (AHRD V3.11 *-* tr|Q6WAY7|Q6WAY7_PEA)	0	0	0	0.24	0.24	0.49	0	0.323333	------	------	------	------	------	------	------	------	XP_004237305.1	uncharacterized protein LOC101264208 [Solanum lycopersicum]	------	------	------	------	------
gene_Solyc04g055257.1	Solyc04g055257.1	S-adenosyl-L-methionine-dependent methyltransferases superfamily protein (AHRD V3.3 *** A0A2U1PMX3_ARTAN)	3.91	4.58	4.05	6.84	15.12	5.06	4.18	9.00667	GO:0032259;GO:0008757;GO:0046872;GO:000816	BP:methylation;MF:S-adenosylmethionine-dependent methyltransferase activity;MF:metal ion binding;MF:methyltransferase activity;	K21483	SAMT	------	------	ENOG4111GV5;ENOG4112BHH	S:Function unknown;	XP_004237389.1	salicylate carboxymethyltransferase-like isoform X1 [Solanum lycopersicum]	sp|Q84UB4|BSMT2_PETHY;	S-adenosyl-L-methionine:benzoic acid/salicylic acid carboxyl methyltransferase 2 OS=Petunia hybrida OX=4102 GN=BSMT2 PE=1 SV=1;	PF03492.17	Methyltransf_7	SAM dependent carboxyl methyltransferase
gene_Solyc04g063245.1	Solyc04g063245.1	Cytochrome (AHRD V3.3 *** A0A1U8F0H8_CAPAN)	5.26	4.71	6.06	16.57	12.23	16.92	5.34333	15.24	GO:0055114;GO:0016021;GO:0004497;GO:0020037;GO:0016705;GO:000550	BP:oxidation-reduction process;CC:integral component of membrane;MF:monooxygenase activity;MF:heme binding;MF:oxidoreductase activity, acting on paired donors, with incorporation or reduction of molecular oxygen;MF:iron ion binding;	------	------	------	------	COG2124	Q:Secondary metabolites biosynthesis, transport and catabolism	XP_015071727.1	premnaspirodiene oxygenase-like [Solanum pennellii]	sp|A6YIH8|C7D55_HYOMU;	Premnaspirodiene oxygenase OS=Hyoscyamus muticus OX=35626 GN=CYP71D55 PE=1 SV=1;	PF00067.24	p450	Cytochrome P450
gene_Solyc04g064590.3	Solyc04g064590.3	MAP kinase kinase kinase 33	4.55	3.29	2.05	11.89	6.85	15.62	3.29667	11.4533	GO:0006468;GO:0004674;GO:0005524;GO:000467	BP:protein phosphorylation;MF:protein serine/threonine kinase activity;MF:ATP binding;MF:protein kinase activity;	K04421	MAP3K3, MEKK3	------	------	ENOG410XQGS	T:Signal transduction mechanisms	XP_004237756.1	mitogen-activated protein kinase kinase kinase 3-like isoform X2 [Solanum lycopersicum]	sp|F4HRJ4|M3K3A_ARATH;	Mitogen-activated protein kinase kinase kinase 3 OS=Arabidopsis thaliana OX=3702 GN=MAPKKK3 PE=1 SV=1;	PF00069.27;PF07714.19;PF03109.18	Pkinase;PK_Tyr_Ser-Thr;ABC1	Protein kinase domain;Protein tyrosine and serine/threonine kinase;ABC1 atypical kinase-like domain
gene_Solyc04g071340.5	Solyc04g071340.5	Fructose-1,6-bisphosphatase (AHRD V3.3 *** A6N9A0_FLALI)	29.5	44.64	36.28	74.1	72.98	110.49	36.8067	85.8567	GO:0005975;GO:0030388;GO:0005986;GO:0006000;GO:0006002;GO:0006094;GO:0005737;GO:0005829;GO:0042132;GO:004687	BP:carbohydrate metabolic process;BP:fructose 1,6-bisphosphate metabolic process;BP:sucrose biosynthetic process;BP:fructose metabolic process;BP:fructose 6-phosphate metabolic process;BP:gluconeogenesis;CC:cytoplasm;CC:cytosol;MF:fructose 1,6-bisphosphate 1-phosphatase activity;MF:metal ion binding;	K03841	FBP, fbp	map00010;map00030;map00051;map00710	Glycolysis / Gluconeogenesis;Pentose phosphate pathway;Fructose and mannose metabolism;Carbon fixation in photosynthetic organisms	COG0158	G:Carbohydrate transport and metabolism	XP_004237787.1	fructose-1,6-bisphosphatase, cytosolic [Solanum lycopersicum]	sp|P46276|F16P2_SOLTU;	Fructose-1,6-bisphosphatase, cytosolic OS=Solanum tuberosum OX=4113 PE=2 SV=1;	PF00316.22;PF18913.2	FBPase;FBPase_C	Fructose-1-6-bisphosphatase, N-terminal domain;Fructose-1-6-bisphosphatase, C-terminal domain
gene_Solyc04g072000.5	Solyc04g072000.5	Chitinase (AHRD V3.11 *** tr|A0A2U1LR12|A0A2U1LR12_ARTAN)	3.88	3.8	3.7	18.8	11.96	13.62	3.79333	14.7933	GO:0005975;GO:0016998;GO:0006952;GO:0006032;GO:0005773;GO:0005576;GO:0008061;GO:000456	BP:carbohydrate metabolic process;BP:cell wall macromolecule catabolic process;BP:defense response;BP:chitin catabolic process;CC:vacuole;CC:extracellular region;MF:chitin binding;MF:chitinase activity;	K01183	E3.2.1.14	map00520	Amino sugar and nucleotide sugar metabolism	COG3979	G:Carbohydrate transport and metabolism	XP_004237833.1	endochitinase EP3 [Solanum lycopersicum]	sp|Q9M2U5|CHI5_ARATH;	Endochitinase EP3 OS=Arabidopsis thaliana OX=3702 GN=EP3 PE=1 SV=1;	PF00182.21;PF00187.21	Glyco_hydro_19;Chitin_bind_1	Chitinase class I;Chitin recognition protein
gene_Solyc04g072280.3	Solyc04g072280.3	Laccase (AHRD V3.3 *** K4BTL5_SOLLC)	0.03	0.03	0	2.58	0.03	0.36	0.02	0.99	GO:0046274;GO:0055114;GO:0016021;GO:0048046;GO:0052716;GO:0005507;GO:001649	BP:lignin catabolic process;BP:oxidation-reduction process;CC:integral component of membrane;CC:apoplast;MF:hydroquinon;MF:copper ion binding;MF:oxidoreductase activity;	K05909	E1.10.3.2	------	------	COG2132	Q:Secondary metabolites biosynthesis, transport and catabolism	XP_004237852.1	laccase-14-like [Solanum lycopersicum]	sp|Q9FY79|LAC14_ARATH;	Laccase-14 OS=Arabidopsis thaliana OX=3702 GN=LAC14 PE=2 SV=1;	PF07731.16;PF00394.24;PF07732.17	Cu-oxidase_2;Cu-oxidase;Cu-oxidase_3	Multicopper oxidase;Multicopper oxidase;Multicopper oxidase
gene_Solyc04g076450.1	Solyc04g076450.1	LRR receptor-like serine/threonine-protein kinase GS.1	4.88	4.83	3.67	12.31	8.47	11.03	4.46	10.6033	GO:0009755;GO:0016021;GO:0005886;GO:0016301;GO:000551	BP:hormone-mediated signaling pathway;CC:integral component of membrane;CC:plasma membrane;MF:kinase activity;MF:protein binding;	------	------	------	------	COG4886	S:Function unknown	XP_010320517.1	receptor-like protein 15 [Solanum lycopersicum]	sp|Q9LNV9|RLP1_ARATH;	Receptor-like protein 1 OS=Arabidopsis thaliana OX=3702 GN=RLP1 PE=2 SV=2;	PF13855.8;PF12799.9	LRR_8;LRR_4	Leucine rich repeat;Leucine Rich repeats
gene_Solyc04g077400.4	Solyc04g077400.4	ERD (Early-responsive to dehydration stress) family protein (AHRD V3.3 *** A0A1P8B4I8_ARATH)	0.71	0.58	0.61	1.14	1	1.44	0.633333	1.19333	GO:0006811;GO:0016020;GO:0016021;GO:0005886;GO:000522	BP:ion transport;CC:membrane;CC:integral component of membrane;CC:plasma membrane;MF:calcium activated cation channel activity;	K21989	TMEM63, CSC1	------	------	COG5594;COG0515	S:Function unknown;T:Signal transduction mechanisms	XP_010320285.1	CSC1-like protein RXW8 isoform X4 [Solanum lycopersicum]	sp|F4IBD7|CSCLA_ARATH;	CSC1-like protein RXW8 OS=Arabidopsis thaliana OX=3702 GN=RXW8 PE=2 SV=1;	PF02714.17;PF13967.8;PF14703.8	RSN1_7TM;RSN1_TM;PHM7_cyt	Calcium-dependent channel, 7TM region, putative phosphate;Late exocytosis, associated with Golgi transport;Cytosolic domain of 10TM putative phosphate transporter
gene_Solyc04g078800.3	Solyc04g078800.3	Lipase (AHRD V3.3 *** A0A200QYW4_9MAGN)	0.87	0.72	0.78	2.12	1.75	1.32	0.79	1.73	GO:0006629;GO:001602	BP:lipid metabolic process;CC:integral component of membrane;	------	------	------	------	COG3675	S:Function unknown	XP_004238147.1	uncharacterized protein LOC101251879 isoform X1 [Solanum lycopersicum]	sp|A0A1S3ZP85|OBL1_TOBAC;	Triacylglycerol lipase OBL1 OS=Nicotiana tabacum OX=4097 GN=OBL1 PE=1 SV=1;	PF01764.27	Lipase_3	Lipase
gene_Solyc04g078900.3	Solyc04g078900.3	ABA 8'-hydroxylase	14.97	13.03	14.34	30.36	17.94	32.24	14.1133	26.8467	GO:0009733;GO:0046345;GO:0016125;GO:0009737;GO:0009856;GO:0009414;GO:0055114;GO:0016021;GO:0020037;GO:0016705;GO:0010295;GO:0004497;GO:0005506;GO:001649	BP:response to auxin;BP:abscisic acid catabolic process;BP:sterol metabolic process;BP:response to abscisic acid;BP:pollination;BP:response to water deprivation;BP:oxidation-reduction process;CC:integral component of membrane;MF:heme binding;MF:oxidoreductase activity, acting on paired donors, with incorporation or reduction of molecular oxygen;MF:;MF:monooxygenase activity;MF:iron ion binding;MF…	K09843	CYP707A	map00906	Carotenoid biosynthesis	COG2124	Q:Secondary metabolites biosynthesis, transport and catabolism	NP_001234517.1	abscisic acid 8'-hydroxylase CYP707A1 [Solanum lycopersicum]	sp|A9QNE7|ABAH1_SOLLC;	Abscisic acid 8'-hydroxylase CYP707A1 OS=Solanum lycopersicum OX=4081 GN=CYP707A1 PE=2 SV=1;	PF00067.24	p450	Cytochrome P450
gene_Solyc04g078910.3	Solyc04g078910.3	Thioredoxin-like 4, chloroplastic (AHRD V3.3 *** A0A2G2VBX3_CAPBA)	18.2	26.66	27.29	51.51	40.69	57.01	24.05	49.7367	GO:0045454;GO:000950	BP:cell redox homeostasis;CC:chloroplast;	------	------	------	------	COG5601	K:Transcription	XP_010320331.1	thioredoxin-like 4, chloroplastic [Solanum lycopersicum]	sp|Q9C5C5|TRL4_ARATH;	Thioredoxin-like 4, chloroplastic OS=Arabidopsis thaliana OX=3702 GN=At1g07700 PE=2 SV=1;	PF00085.22	Thioredoxin	Thioredoxin
gene_Solyc04g079250.3	Solyc04g079250.3	Patatin (AHRD V3.3 *** A0A2G2ZRS1_CAPAN)	14.2	16.87	22.19	46.59	66.66	36.41	17.7533	49.8867	GO:0006629;GO:0016042;GO:0005773;GO:0016787;GO:0045735;GO:0004620;GO:004737	BP:lipid metabolic process;BP:lipid catabolic process;CC:vacuole;MF:hydrolase activity;MF:nutrient reservoir activity;MF:phospholipase activity;MF:acylglycerol lipase activity;	------	------	------	------	COG3621	S:Function unknown	XP_004238176.1	patatin-like protein 2 [Solanum lycopersicum]	sp|O48723|PLP2_ARATH;	Patatin-like protein 2 OS=Arabidopsis thaliana OX=3702 GN=PLP2 PE=1 SV=1;	PF01734.24	Patatin	Patatin-like phospholipase
gene_Solyc04g079730.1	Solyc04g079730.1	allene oxide synthase	13.73	6.49	5.99	18.89	27.86	8.14	8.73667	18.2967	GO:0006633;GO:0016125;GO:0009695;GO:0031408;GO:0006952;GO:0055114;GO:0009941;GO:0009535;GO:0004497;GO:0009978;GO:0020037;GO:0016705;GO:0047987;GO:0005506;GO:001649	BP:fatty acid biosynthetic process;BP:sterol metabolic process;BP:jasmonic acid biosynthetic process;BP:oxylipin biosynthetic process;BP:defense response;BP:oxidation-reduction process;CC:chloroplast envelope;CC:chloroplast thylakoid membrane;MF:monooxygenase activity;MF:allene oxide synthase activity;MF:heme binding;MF:oxidoreductase activity, acting on paired donors, with incorporation or reduc…	K01723	AOS	map00592	alpha-Linolenic acid metabolism	ENOG410ZAGU	Q:Secondary metabolites biosynthesis, transport and catabolism	NP_001234833.2	allene oxide synthase [Solanum lycopersicum]	sp|K4BV52|AOS1_SOLLC;	Allene oxide synthase 1, chloroplastic OS=Solanum lycopersicum OX=4081 GN=AOS1 PE=2 SV=1;	PF00067.24	p450	Cytochrome P450
gene_Solyc04g080540.2	Solyc04g080540.2	DNA polymerase epsilon catalytic subunit A (AHRD V3.3 *** AT1G19530.2)	1.61	1.98	1.08	6.06	1.83	7.33	1.55667	5.07333	GO:000906	BP:anaerobic respiration;	------	------	------	------	ENOG410YWFS	S:Function unknown	XP_004238295.1	uncharacterized protein LOC101245159 [Solanum lycopersicum]	------	------	------	------	------
gene_Solyc04g082420.3	Solyc04g082420.3	BTB/POZ domain-containing protein (AHRD V3.3 *** A0A1U8GAB1_CAPAN)	75.31	84.69	66.98	144.56	192.13	156.05	75.66	164.247	GO:0016021;GO:000551	CC:integral component of membrane;MF:protein binding;	------	------	------	------	ENOG410XNX8;COG5021	S:Function unknown;O:Posttranslational modification, protein turnover, chaperones	XP_010320455.1	BTB/POZ domain-containing protein At2g30600 isoform X1 [Solanum lycopersicum]	sp|Q8LEV3|Y2060_ARATH;	BTB/POZ domain-containing protein At2g30600 OS=Arabidopsis thaliana OX=3702 GN=At2g30600/At2g30610 PE=2 SV=1;	PF00651.33;PF12248.10	BTB;Methyltransf_FA	BTB/POZ domain;Farnesoic acid 0-methyl transferase
gene_Solyc05g005180.3	Solyc05g005180.3	1,4-dihydroxy-2-naphthoyl-CoA synthase (AHRD V3.3 *** A0A2G2XZJ4_CAPAN)	20.76	35.79	43.15	65.47	69.63	76.65	33.2333	70.5833	GO:0009234;GO:0005829;GO:0009507;GO:0003824;GO:000893	BP:menaquinone biosynthetic process;CC:cytosol;CC:chloroplast;MF:catalytic activity;MF:1,4-dihydroxy-2-naphthoyl-CoA synthase activity;	K01661	menB	map00130;map01240	Ubiquinone and other terpenoid-quinone biosynthesis;Biosynthesis of cofactors	COG0447	H:Coenzyme transport and metabolism	XP_004238650.1	1,4-dihydroxy-2-naphthoyl-CoA synthase, peroxisomal [Solanum lycopersicum]	sp|Q8GYN9|MENB_ARATH;	1,4-dihydroxy-2-naphthoyl-CoA synthase, peroxisomal OS=Arabidopsis thaliana OX=3702 GN=MENB PE=1 SV=2;	PF00378.22;PF16113.7	ECH_1;ECH_2	Enoyl-CoA hydratase/isomerase;Enoyl-CoA hydratase/isomerase
gene_Solyc05g012900.4	Solyc05g012900.4	JJH-R-like protein	3.09	2.4	1.91	4.46	4.89	5.24	2.46667	4.86333	GO:0009626;GO:0005737;GO:0016020;GO:004353	BP:plant-type hypersensitive response;CC:cytoplasm;CC:membrane;MF:ADP binding;	------	------	------	------	COG4886	S:Function unknown	ABA41595.1	JJH-R-like protein [Solanum lycopersicum]	sp|Q6L400|R1B16_SOLDE;	Putative late blight resistance protein homolog R1B-16 OS=Solanum demissum OX=50514 GN=R1B-16 PE=3 SV=1;	PF12799.9	LRR_4	Leucine Rich repeats
gene_Solyc05g013810.5	Solyc05g013810.5	Cellulase (Glycosyl hydrolase family 5) protein (AHRD V3.11 *-* tr|A0A1I9LMY2|A0A1I9LMY2_ARATH)	1.94	1.86	1.65	3.15	3.96	2.43	1.81667	3.18	GO:0005975;GO:0071704;GO:0016021;GO:0005576;GO:0016985;GO:000455	BP:carbohydrate metabolic process;BP:organic substance metabolic process;CC:integral component of membrane;CC:extracellular region;MF:mannan endo-1,4-beta-mannosidase activity;MF:hydrolase activity, hydrolyzing O-glycosyl compounds;	------	------	------	------	ENOG410XQBB;ENOG410ZYM0	G:Carbohydrate transport and metabolism;	XP_004239150.1	glycosyl hydrolase 5 family protein [Solanum lycopersicum]	sp|C0HLA0|GH5FP_CHAOB;	Glycosyl hydrolase 5 family protein OS=Chamaecyparis obtusa OX=13415 PE=1 SV=1;	PF00150.20	Cellulase	Cellulase
gene_Solyc05g018230.4	Solyc05g018230.4	Sugar transporter protein 12	15.94	14.08	15.91	32.33	27.62	33.36	15.31	31.1033	GO:0006817;GO:0055085;GO:0008643;GO:0016021;GO:002285	BP:phosphate ion transport;BP:transmembrane transport;BP:carbohydrate transport;CC:integral component of membrane;MF:transmembrane transporter activity;	K24193	STP	------	------	ENOG410XNQK;COG0477	G:Carbohydrate transport and metabolism;	NP_001289836.1	sugar transport protein 14 [Solanum lycopersicum]	sp|Q8GW61|STP14_ARATH;	Sugar transport protein 14 OS=Arabidopsis thaliana OX=3702 GN=STP14 PE=2 SV=2;	PF00083.26;PF07690.18	Sugar_tr;MFS_1	Sugar;Major Facilitator Superfamily
gene_Solyc05g050110.3	Solyc05g050110.3	DUF2358 domain-containing protein (AHRD V3.3 *** A0A1Q3BPE1_CEPFO)	41.28	52.3	44.77	90.52	64.06	102.27	46.1167	85.6167	------	------	------	------	------	------	ENOG4111N7Q	S:Function unknown	XP_004240091.1	uncharacterized protein LOC101254096 [Solanum lycopersicum]	------	------	PF10184.11;PF12680.9	DUF2358;SnoaL_2	Uncharacterized conserved protein;SnoaL-like domain
gene_Solyc05g050700.1	Solyc05g050700.1	Leucine-rich repeat protein (AHRD V3.3 *** A0A0A6ZKK7_PETHY)	1.16	1.45	1.18	2.13	2.36	2.55	1.26333	2.34667	GO:0016020;GO:0005886;GO:0005515;GO:001630	CC:membrane;CC:plasma membrane;MF:protein binding;MF:kinase activity;	------	------	------	------	COG4886	S:Function unknown	XP_004240268.1	LRR receptor-like serine/threonine-protein kinase FLS2 [Solanum lycopersicum]	------	------	PF13855.8;PF12799.9	LRR_8;LRR_4	Leucine rich repeat;Leucine Rich repeats
gene_Solyc05g050710.3	Solyc05g050710.3	Lecithin-cholesterol acyltransferase-like.1	5.54	8.25	8.89	14.37	11.21	14.88	7.56	13.4867	GO:0006629;GO:0008374;GO:000480	BP:lipid metabolic process;MF:O-acyltransferase activity;MF:triglyceride lipase activity;	------	------	------	------	ENOG410Y9CF	S:Function unknown	XP_004240065.1	lecithin-cholesterol acyltransferase-like 1 [Solanum lycopersicum]	sp|Q9FZI8|LCAT1_ARATH;	Lecithin-cholesterol acyltransferase-like 1 OS=Arabidopsis thaliana OX=3702 GN=LCAT1 PE=2 SV=1;	PF02450.17;PF12146.10;PF07819.15;PF12697.9	LCAT;Hydrolase_4;PGAP1;Abhydrolase_6	Lecithi;Serine aminopeptidase, S33;PGAP1-like protein;Alpha/beta hydrolase family
gene_Solyc05g050800.3	Solyc05g050800.3	Phosphoglycerate mutase family protein (AHRD V3.3 *** A0A1I9LN21_ARATH)	84.17	64.19	60.56	125.91	125.76	105.73	69.64	119.133	------	------	------	------	------	------	COG0406;ENOG410XZE0	G:Carbohydrate transport and metabolism;U:Intracellular trafficking, secretion, and vesicular transport	NP_001297054.1	phosphoglycerate mutase family protein [Solanum lycopersicum]	------	------	PF00300.24	His_Phos_1	Histidine phosphatase superfamily
gene_Solyc05g051900.3	Solyc05g051900.3	Major facilitator superfamily (AHRD V3.3 *** A0A200QUR2_9MAGN)	11.13	12.87	14.4	31.77	38.8	34.32	12.8	34.9633	GO:0006817;GO:0055085;GO:0016021;GO:002285	BP:phosphate ion transport;BP:transmembrane transport;CC:integral component of membrane;MF:transmembrane transporter activity;	------	------	------	------	COG0477	G:Carbohydrate transport and metabolism	XP_004239990.1	uncharacterized protein LOC101247024 [Solanum lycopersicum]	sp|Q5HHX4|NORA_STAAC;	Quinolone resistance protein NorA OS=Staphylococcus aureus;	PF07690.18;PF00083.26	MFS_1;Sugar_tr	Major Facilitator Superfamily;Sugar
gene_Solyc05g054880.3	Solyc05g054880.3	U4/U6 small nuclear ribonucleoprotein Prp3 (AHRD V3.3 *** A0A1J3FFH9_NOCCA)	2.42	2.34	1.91	5.2	3.67	4.82	2.22333	4.56333	GO:0000398;GO:004654	BP:mRNA splicing, via spliceosome;CC:U4/U6 x U5 tri-snRNP complex;	K12843	PRPF3, PRP3	map03040	Spliceosome	ENOG410XQV0	A:RNA processing and modification	XP_019069414.1	protein RDM16 isoform X2 [Solanum lycopersicum]	sp|Q9C7E7|RDM16_ARATH;	Protein RDM16 OS=Arabidopsis thaliana OX=3702 GN=RDM16 PE=2 SV=1;	PF08572.12;PF06544.14	PRP3;DUF1115	pre-mRNA processing factor 3;Protein of unknown function
gene_Solyc05g055740.5	Solyc05g055740.5	Tyrosine phosphatase family protein (AHRD V3.11 *** tr|A0A2U1PX48|A0A2U1PX48_ARTAN)	2.65	5.35	3.21	8.25	5.57	9.61	3.73667	7.81	GO:0005737;GO:000472	CC:cytoplasm;MF:protein tyrosine phosphatase activity;	K18045	SIW14, OCA3	------	------	COG2365	T:Signal transduction mechanisms	KAG5607918.1	hypothetical protein H5410_029410 [Solanum commersonii]	sp|Q681Z2|DSP3_ARATH;	Tyrosine-protein phosphatase DSP3 OS=Arabidopsis thaliana OX=3702 GN=DSP3 PE=1 SV=1;	PF03162.15;PF13350.8	Y_phosphatase2;Y_phosphatase3	Tyrosine phosphatase family;Tyrosine phosphatase family
gene_Solyc05g056030.3	Solyc05g056030.3	Patatin (AHRD V3.3 *** A0A2G3CIZ2_CAPCH)	5.43	7.05	4.46	13.41	8.17	13.19	5.64667	11.59	GO:0006629;GO:0016042;GO:0005773;GO:0016787;GO:004573	BP:lipid metabolic process;BP:lipid catabolic process;CC:vacuole;MF:hydrolase activity;MF:nutrient reservoir activity;	------	------	------	------	COG3621;ENOG4111EY4	S:Function unknown;	XP_004239676.1	patatin-like protein 6 [Solanum lycopersicum]	sp|O80959|PLP6_ARATH;	Patatin-like protein 6 OS=Arabidopsis thaliana OX=3702 GN=PLP6 PE=1 SV=1;	PF01734.24	Patatin	Patatin-like phospholipase
gene_Solyc05g150152.1	Solyc05g150152.1	Photosystem I reaction centre subunit N protein (AHRD V3.3 *** A0A2U1NHW7_ARTAN)	10.63	13.16	12.53	30.15	23.81	28.31	12.1067	27.4233	GO:0015979;GO:0009522;GO:000950	BP:photosynthesis;CC:photosystem I;CC:chloroplast;	------	------	------	------	ENOG410XY0C	S:Function unknown	XP_004239734.1	uncharacterized protein LOC101247619 [Solanum lycopersicum]	------	------	PF05479.13	PsaN	Photosystem I reaction centre subunit N
gene_Solyc06g005710.3	Solyc06g005710.3	Protein TIC 62, chloroplastic (AHRD V3.3 *** A0A1J3HBE9_NOCCA)	54.58	94.89	107.81	157.67	199.42	191.61	85.76	182.9	------	------	------	------	------	------	COG0702;COG0702	G:Carbohydrate transport and metabolism;M:Cell wall/membrane/envelope biogenesis	XP_004240374.1	protein PLASTID TRANSCRIPTIONALLY ACTIVE 16, chloroplastic [Solanum lycopersicum]	sp|Q9STF2|PTA16_ARATH;	Protein PLASTID TRANSCRIPTIONALLY ACTIVE 16, chloroplastic OS=Arabidopsis thaliana OX=3702 GN=PTAC16 PE=1 SV=1;	PF13460.8;PF05368.15	NAD_binding_10;NmrA	NA;NmrA-like family
gene_Solyc06g007160.5	Solyc06g007160.5	Alternative NAD(P)H dehydrogenase mitochondrial-like (AHRD V3.11 *** tr|A0A2K3P845|A0A2K3P845_TRIPR)	32.76	50.51	47.24	79.2	64.38	93.18	43.5033	78.92	GO:0055114;GO:0005777;GO:0005743;GO:0005759;GO:0003959;GO:0050136;GO:001649	BP:oxidation-reduction process;CC:peroxisome;CC:mitochondrial inner membrane;CC:mitochondrial matrix;MF:NADPH dehydrogenase activity;MF:NADH dehydrogenas;MF:oxidoreductase activity;	K03885	ndh	map00190	Oxidative phosphorylation	COG1252	C:Energy production and conversion	XP_004240404.1	internal alternative NAD(P)H-ubiquinone oxidoreductase A1, mitochondrial [Solanum lycopersicum]	sp|M0ZYF3|INDA1_SOLTU;	Internal alternative NA;	PF07992.16;PF00070.29	Pyr_redox_2;Pyr_redox	Pyridine nucleotide-disulphide oxidoreductase;Pyridine nucleotide-disulphide oxidoreductase
gene_Solyc06g008270.2	Solyc06g008270.2	Cladosporium fulvum resistance 2.2	0.51	0.22	0.11	1.03	1.17	1.38	0.28	1.19333	GO:0016021;GO:0005886;GO:000551	CC:integral component of membrane;CC:plasma membrane;MF:protein binding;	------	------	------	------	COG4886	S:Function unknown	QNN89959.1	Cf-12 [Solanum lycopersicum]	sp|O49879|CF0_SOLLC;	Receptor-like protein Cf-9 homolog OS=Solanum lycopersicum OX=4081 GN=HCR9-0 PE=2 SV=2;	PF13855.8;PF12799.9;PF08263.14	LRR_8;LRR_4;LRRNT_2	Leucine rich repeat;Leucine Rich repeats;Leucine rich repeat N-terminal domain
gene_Solyc06g008300.4	Solyc06g008300.4	Hcr2-5D (AHRD V3.3 *** Q9ZTJ6_SOLLC)	16.24	14.99	12.19	29.75	18.96	26.94	14.4733	25.2167	GO:0016021;GO:0005886;GO:000551	CC:integral component of membrane;CC:plasma membrane;MF:protein binding;	------	------	------	------	COG4886	S:Function unknown	AAC78593.1	Hcr2-0B [Solanum lycopersicum]	sp|O49879|CF0_SOLLC;	Receptor-like protein Cf-9 homolog OS=Solanum lycopersicum OX=4081 GN=HCR9-0 PE=2 SV=2;	PF13855.8;PF12799.9;PF08263.14	LRR_8;LRR_4;LRRNT_2	Leucine rich repeat;Leucine Rich repeats;Leucine rich repeat N-terminal domain
gene_Solyc06g035940.3	Solyc06g035940.3	Homeobox-leucine zipper protein ROC5 (AHRD V3.3 *** A0A2G2X6G6_CAPBA)	0.05	0.03	0	34.4	3.08	9.2	0.026667	15.56	GO:0005634;GO:0008289;GO:000367	CC:nucleus;MF:lipid binding;MF:DNA binding;	K09338	HD-ZIP	------	------	ENOG410ZZ6J;ENOG410ZTUH;ENOG411107H;ENOG410YIJ3	K:Transcription;S:Function unknown;K:Transcription;K:Transcription	XP_004240735.1	homeobox-leucine zipper protein HDG1 isoform X2 [Solanum lycopersicum]	sp|Q9M2E8|HDG1_ARATH;	Homeobox-leucine zipper protein HDG1 OS=Arabidopsis thaliana OX=3702 GN=HDG1 PE=2 SV=1;	PF01852.21;PF00046.31	START;Homeodomain	START domain;Homeodomain
gene_Solyc06g050837.2	Solyc06g050837.2	ARM repeat superfamily protein (AHRD V3.11 *-* tr|A0A2U1PUY4|A0A2U1PUY4_ARTAN)	3.62	4.12	3.29	6.71	7.19	8.49	3.67667	7.46333	GO:001602	CC:integral component of membrane;	------	------	------	------	ENOG4112453	S:Function unknown	PHT78234.1	hypothetical protein T459_16286 [Capsicum annuum]	------	------	------	------	------
gene_Solyc06g054540.3	Solyc06g054540.3	E3 ubiquitin-protein ligase MIEL1-like (AHRD V3.3 *** A0A1S4BAM5_TOBAC)	2.25	3.35	4.97	5.4	8.92	7.16	3.52333	7.16	GO:0016567;GO:0006511;GO:0005634;GO:0061630;GO:000827	BP:protein ubiquitination;BP:ubiquitin-dependent protein catabolic process;CC:nucleus;MF:ubiquitin protein ligase activity;MF:zinc ion binding;	K10144	RCHY1, PIRH2	map04120	Ubiquitin mediated proteolysis	ENOG410XXHF	S:Function unknown	XP_004241068.1	E3 ubiquitin-protein ligase MIEL1 [Solanum lycopersicum]	sp|Q8VZK0|MIEL1_ARATH;	E3 ubiquitin-protein ligase MIEL1 OS=Arabidopsis thaliana OX=3702 GN=MIEL1 PE=1 SV=1;	PF14599.8;PF05495.14;PF13639.8;PF00097.27;PF13445.8;PF13923.8	zinc_ribbon_6;zf-CHY;zf-RING_2;zf-C3HC4;zf-RING_UBOX;zf-C3HC4_2	Zinc-ribbon;CHY zinc finger;Ring finger domain;Zinc finger, C3HC4 type;RING-type zinc-finger;Zinc finger, C3HC4 type
gene_Solyc06g063180.4	Solyc06g063180.4	Glutamate receptor (AHRD V3.11 *** tr|A0A2G2WKP3|A0A2G2WKP3_CAPBA)	11.63	9.07	10.7	25.61	17.82	20.17	10.4667	21.2	GO:0016021;GO:0005886;GO:0038023;GO:001527	CC:integral component of membrane;CC:plasma membrane;MF:signaling receptor activity;MF:ligand-gated ion channel activity;	K05387	GRIP	------	------	ENOG410XQQV;ENOG41120B7	S:Function unknown;P:Inorganic ion transport and metabolism	NP_001307922.1	glutamate receptor 2.2 [Solanum lycopersicum]	sp|Q9C5V5|GLR28_ARATH;	Glutamate receptor 2.8 OS=Arabidopsis thaliana OX=3702 GN=GLR2.8 PE=2 SV=2;	PF01094.30;PF00060.28;PF00497.22;PF13458.8;PF10613.11	ANF_receptor;Lig_chan;SBP_bac_3;Peripla_BP_6;Lig_chan-Glu_bd	Receptor family ligand binding region;Ligand-gated ion channel;Bacterial extracellular solute-binding proteins, family 3;Periplasmic binding protein;Ligated ion channel L-glutamate- and glycine-binding site
gene_Solyc06g063370.3	Solyc06g063370.3	Chlorophyll a-b binding protein, chloroplastic (AHRD V3.3 *** A0A2G2V937_CAPBA)	1311.79	1670.64	1674.87	2574	3178.46	3157.64	1552.43	2970.03	GO:0018298;GO:0009768;GO:0009416;GO:0009765;GO:0009535;GO:0009522;GO:0009523;GO:0010287;GO:001616	BP:protein-chromophore linkage;BP:photosynthesis, light harvesting in photosystem I;BP:response to light stimulus;BP:photosynthesis, light harvesting;CC:chloroplast thylakoid membrane;CC:photosystem I;CC:photosystem II;CC:plastoglobule;MF:chlorophyll binding;	K08916	LHCB5	map00196	Photosynthesis - antenna proteins	ENOG41110WY	S:Function unknown	NP_001317571.1	chlorophyll a-b binding protein Cab9 [Solanum lycopersicum]	sp|Q9XF89|CB5_ARATH;	Chlorophyll a-b binding protein CP26, chloroplastic OS=Arabidopsis thaliana OX=3702 GN=LHCB5 PE=1 SV=1;	PF00504.23	Chloroa_b-bind	Chlorophyll A-B binding protein
gene_Solyc06g068010.3	Solyc06g068010.3	Biotin carboxyl carrier protein of acetyl-CoA carboxylase (AHRD V3.3 *** A0A1J3F9E7_NOCCA)	20.57	32.65	32.44	63.46	55.64	68.89	28.5533	62.6633	------	------	------	------	------	------	ENOG41120W7	S:Function unknown	XP_004241703.1	uncharacterized protein LOC101265244 isoform X1 [Solanum lycopersicum]	sp|Q06881|BCCP_NOSS1;	Biotin carboxyl carrier protein of acetyl-CoA carboxylase OS=Nostoc sp.;	PF00364.24;PF13533.8	Biotin_lipoyl;Biotin_lipoyl_2	Biotin-requiring enzyme;Biotin-lipoyl like
gene_Solyc06g068270.3	Solyc06g068270.3	2-oxoglutarate (2OG) and Fe(II)-dependent oxygenase superfamily protein (AHRD V3.3 *** Q9XIA5_ARATH)	6.07	7.7	10.45	18.08	15.92	19.12	8.07333	17.7067	GO:0032259;GO:0055114;GO:0031418;GO:0008168;GO:0046872;GO:001649	BP:methylation;BP:oxidation-reduction process;MF:L-ascorbic acid binding;MF:methyltransferase activity;MF:metal ion binding;MF:oxidoreductase activity;	------	------	------	------	COG3491	S:Function unknown	XP_004241689.1	protein SRG1-like [Solanum lycopersicum]	sp|Q39224|SRG1_ARATH;	Protein SRG1 OS=Arabidopsis thaliana OX=3702 GN=SRG1 PE=2 SV=1;	PF14226.8;PF03171.22	DIOX_N;2OG-FeII_Oxy	non-haem dioxygenase in morphine synthesis N-terminal;2OG-F
gene_Solyc06g068460.3	Solyc06g068460.3	WRKY transcription factor 40	85.67	82.86	89.03	161.55	204.37	119.49	85.8533	161.803	GO:0006355;GO:0005634;GO:0003700;GO:004356	BP:regulation of transcription, DNA-templated;CC:nucleus;MF:transcription factor activity, sequence-specific DNA binding;MF:sequence-specific DNA binding;	------	------	------	------	ENOG410YHES	K:Transcription	NP_001234301.2	WRKY transcription factor 40 [Solanum lycopersicum]	sp|Q9SAH7|WRK40_ARATH;	Probable WRKY transcription factor 40 OS=Arabidopsis thaliana OX=3702 GN=WRKY40 PE=1 SV=1;	PF03106.17	WRKY	WRKY DNA -binding domain
gene_Solyc06g069190.4	Solyc06g069190.4	Eukaryotic aspartyl protease family protein (AHRD V3.3 *** A0A2U1MGD4_ARTAN)	33.84	31.82	28.94	62.24	59.66	57.53	31.5333	59.81	GO:0050832;GO:0016021;GO:000419	BP:defense response to fungus;CC:integral component of membrane;MF:aspartic-type endopeptidase activity;	------	------	------	------	ENOG410XNV7	O:Posttranslational modification, protein turnover, chaperones	NP_001333817.1	aspartyl protease APCB1-like [Solanum lycopersicum]	sp|Q9M9A8|APCB1_ARATH;	Aspartyl protease APCB1 OS=Arabidopsis thaliana OX=3702 GN=APCB1 PE=1 SV=1;	PF14543.8;PF00026.25;PF14541.8	TAXi_N;Asp;TAXi_C	Xylanase inhibitor N-terminal;Eukaryotic aspartyl protease;Xylanase inhibitor C-terminal
gene_Solyc06g069730.3	Solyc06g069730.3	Chlorophyll a-b binding protein, chloroplastic (AHRD V3.3 *** A0A1U8GPF4_CAPAN)	42.8	105.88	145.66	211.38	385.36	207.29	98.1133	268.01	GO:0018298;GO:0009768;GO:0009416;GO:0009765;GO:0009535;GO:0009522;GO:0009523;GO:0016021;GO:001616	BP:protein-chromophore linkage;BP:photosynthesis, light harvesting in photosystem I;BP:response to light stimulus;BP:photosynthesis, light harvesting;CC:chloroplast thylakoid membrane;CC:photosystem I;CC:photosystem II;CC:integral component of membrane;MF:chlorophyll binding;	K08910	LHCA4	map00196	Photosynthesis - antenna proteins	ENOG4110JH3	S:Function unknown	NP_001317570.1	chlorophyll a-b binding protein Cab12 [Solanum lycopersicum]	sp|P27521|CA4_ARATH;	Chlorophyll a-b binding protein 4, chloroplastic OS=Arabidopsis thaliana OX=3702 GN=LHCA4 PE=1 SV=1;	PF00504.23	Chloroa_b-bind	Chlorophyll A-B binding protein
gene_Solyc06g071290.3	Solyc06g071290.3	Aldehyde dehydrogenase (AHRD V3.3 *** A0A0K9R405_SPIOL)	38.84	46.84	40.77	78.14	80.24	94.32	42.15	84.2333	GO:0055114;GO:0016491;GO:0016620;GO:000016	BP:oxidation-reduction process;MF:oxidoreductase activity;MF:oxidoreductase activity, acting on the aldehyde or oxo group of donors, NAD or NADP as acceptor;MF:nucleotide binding;	K00130	betB, gbsA	map00260	Glycine, serine and threonine metabolism	COG1012	C:Energy production and conversion	NP_001333606.1	putative betaine aldehyde dehyrogenase [Solanum lycopersicum]	sp|O04895|BADH_AMAHP;	Betaine aldehyde dehydrogenase, chloroplastic OS=Amaranthus hypochondriacus OX=28502 GN=BADH4 PE=3 SV=1;	PF00171.24	Aldedh	Aldehyde dehydrogenase family
gene_Solyc06g071700.1	Solyc06g071700.1	Amine oxidase (AHRD V3.3 *** A0A2G2V6E4_CAPBA)	0	0.03	0	0.21	0.07	0.4	0.01	0.226667	GO:0009308;GO:0055114;GO:0052593;GO:0005507;GO:0052596;GO:0052595;GO:0052594;GO:0008131;GO:004803	BP:amine metabolic process;BP:oxidation-reduction process;MF:tryptamin;MF:copper ion binding;MF:phenethylamin;MF:aliphatic-amine oxidase activity;MF:aminoaceton;MF:primary amine oxidase activity;MF:quinone binding;	K00276	AOC3, AOC2, tynA	map00260;map00960;map00950;map00360;map00350;map00410	Glycine, serine and threonine metabolism;Tropane, piperidine and pyridine alkaloid biosynthesis;Isoquinoline alkaloid biosynthesis;Phenylalanine metabolism;Tyrosine metabolism;beta-Alanine metabolism	COG3733	Q:Secondary metabolites biosynthesis, transport and catabolism	XP_010322539.1	uncharacterized protein LOC101253199 [Solanum lycopersicum]	sp|Q07121|AMO1_ARTS1;	Primary amine oxidase OS=Arthrobacter sp.;	PF01179.22;PF02728.18;PF02727.18	Cu_amine_oxid;Cu_amine_oxidN3;Cu_amine_oxidN2	Copper amine oxidase, enzyme domain;Copper amine oxidase, N3 domain;Copper amine oxidase, N2 domain
gene_Solyc06g073360.3	Solyc06g073360.3	succinate dehydrogenase subunit 7B, mitochondrial (AHRD V3.3 *** A0A2I4HJZ8_9ROSI)	41.5	40.76	22.62	98.62	68.55	93.49	34.96	86.8867	GO:0016021;GO:000574	CC:integral component of membrane;CC:mitochondrial respiratory chain complex II, succinate dehydrogenase comple;	------	------	------	------	ENOG410Y7N2	S:Function unknown	XP_004241402.1	succinate dehydrogenase subunit 7A, mitochondrial-like isoform X1 [Solanum lycopersicum]	sp|Q3E870|SDH7B_ARATH;	Succinate dehydrogenase subunit 7B, mitochondrial OS=Arabidopsis thaliana OX=3702 GN=SDH7B PE=1 SV=1;	------	------	------
gene_Solyc06g076070.1	Solyc06g076070.1	Unknown protein	0.83	0.76	1.43	27.22	10.04	20.74	1.00667	19.3333	GO:001602	CC:integral component of membrane;	------	------	------	------	------	------	KAG5602985.1	hypothetical protein H5410_034355 [Solanum commersonii]	------	------	------	------	------
gene_Solyc06g082590.1	Solyc06g082590.1	DNA-binding protein Pti6	17.56	11.69	13.37	36.09	38.64	29.63	14.2067	34.7867	GO:0006952;GO:0006355;GO:0009873;GO:0005634;GO:0003700;GO:000367	BP:defense response;BP:regulation of transcription, DNA-templated;BP:ethylene-activated signaling pathway;CC:nucleus;MF:transcription factor activity, sequence-specific DNA binding;MF:DNA binding;	K13434	PTI6	map04626	Plant-pathogen interaction	ENOG410YQGI	K:Transcription	NP_001233991.1	pathogenesis-related genes transcriptional activator PTI6 [Solanum lycopersicum]	sp|O04682|PTI6_SOLLC;	Pathogenesis-related genes transcriptional activator PTI6 OS=Solanum lycopersicum OX=4081 GN=PTI6 PE=2 SV=1;	PF00847.22	AP2	AP2 domain
gene_Solyc06g083680.3	Solyc06g083680.3	Photosystem I reaction center subunit IV (AHRD V3.3 *-* A0A2P6U4S6_CHLSO)	268.96	370.7	339.76	570.34	649.36	706.8	326.473	642.167	GO:0015979;GO:0009535;GO:0009522;GO:000953	BP:photosynthesis;CC:chloroplast thylakoid membrane;CC:photosystem I;CC:photosystem I reaction center;	K02693	psaE	map00195	Photosynthesis	ENOG41122QJ	C:Energy production and conversion	XP_004242379.1	photosystem I reaction center subunit IV A, chloroplastic [Solanum lycopersicum]	sp|Q41228|PSAEA_NICSY;	Photosystem I reaction center subunit IV A, chloroplastic OS=Nicotiana sylvestris OX=4096 GN=PSAEA PE=1 SV=1;	PF02427.19	PSI_PsaE	Photosystem I reaction centre subunit IV / PsaE
gene_Solyc07g008590.1	Solyc07g008590.1	receptor-like protein 12 (AHRD V3.3 *** A0A1U8F5D2_CAPAN)	5.08	3.82	5.37	9.52	7.6	7.93	4.75667	8.35	GO:0016021;GO:0005886;GO:0016301;GO:000551	CC:integral component of membrane;CC:plasma membrane;MF:kinase activity;MF:protein binding;	K13466	EIX1_2	map04626	Plant-pathogen interaction	COG4886	S:Function unknown	XP_010323339.1	receptor-like protein EIX1 [Solanum lycopersicum]	sp|Q6JN46|EIX2_SOLLC;	Receptor-like protein EIX2 OS=Solanum lycopersicum OX=4081 GN=EIX2 PE=1 SV=2;	PF13855.8;PF12799.9;PF08263.14	LRR_8;LRR_4;LRRNT_2	Leucine rich repeat;Leucine Rich repeats;Leucine rich repeat N-terminal domain
gene_Solyc07g008620.1	Solyc07g008620.1	EIX receptor 1	3.3	2.39	1.91	6.21	3.93	4.29	2.53333	4.81	GO:0050832;GO:0016021;GO:0005886;GO:0016301;GO:000551	BP:defense response to fungus;CC:integral component of membrane;CC:plasma membrane;MF:kinase activity;MF:protein binding;	K13466	EIX1_2	map04626	Plant-pathogen interaction	COG4886	S:Function unknown	Q6JN47.2;;	;Flags: Precursor [Solanum lycopersicum]	sp|Q6JN47|EIX1_SOLLC;	Receptor-like protein EIX1 OS=Solanum lycopersicum OX=4081 GN=EIX1 PE=2 SV=2;	PF13855.8;PF12799.9;PF08263.14	LRR_8;LRR_4;LRRNT_2	Leucine rich repeat;Leucine Rich repeats;Leucine rich repeat N-terminal domain
gene_Solyc07g014670.3	Solyc07g014670.3	Cytochrome P450 (AHRD V3.3 *-* A0A200QZM5_9MAGN)	16.93	12.85	11.69	29.16	27.98	18.88	13.8233	25.34	GO:0098542;GO:0055114;GO:0016021;GO:0004497;GO:0020037;GO:0016705;GO:000550	BP:defense response to other organism;BP:oxidation-reduction process;CC:integral component of membrane;MF:monooxygenase activity;MF:heme binding;MF:oxidoreductase activity, acting on paired donors, with incorporation or reduction of molecular oxygen;MF:iron ion binding;	------	------	------	------	COG2124	Q:Secondary metabolites biosynthesis, transport and catabolism	XP_004242874.1	cytochrome P450 81D11 [Solanum lycopersicum]	sp|W8JIS9|CYC13_CATRO;	Cytochrome P450 81C13 OS=Catharanthus roseus OX=4058 GN=CYP81C13 PE=2 SV=1;	PF00067.24	p450	Cytochrome P450
gene_Solyc07g032490.3	Solyc07g032490.3	Major facilitator superfamily protein (AHRD V3.3 *** A0A1P8AZ04_ARATH)	25.86	26.27	31.91	70.9	25.34	58.03	28.0133	51.4233	GO:0006857;GO:0009753;GO:0006817;GO:0009611;GO:0055085;GO:0016021;GO:0016020;GO:002285	BP:oligopeptide transport;BP:response to jasmonic acid;BP:phosphate ion transport;BP:response to wounding;BP:transmembrane transport;CC:integral component of membrane;CC:membrane;MF:transmembrane transporter activity;	------	------	------	------	COG3104	E:Amino acid transport and metabolism	XP_010323568.1	protein NRT1/ PTR FAMILY 6.2 [Solanum lycopersicum]	sp|Q9SZY4|PTR27_ARATH;	Protein NRT1/ PTR FAMILY 6.2 OS=Arabidopsis thaliana OX=3702 GN=NPF6.2 PE=1 SV=1;	PF00854.23	PTR2	POT family
gene_Solyc07g043550.3	Solyc07g043550.3	UDP-glucose 4-epimerase (AHRD V3.3 *** A0A1Y1ITM0_KLENI)	6.59	7.11	4.71	14.5	6.56	12.23	6.13667	11.0967	GO:0006012;GO:0016021;GO:000397	BP:galactose metabolic process;CC:integral component of membrane;MF:UDP-glucose 4-epimerase activity;	K12448	UXE, uxe	map00520;map01250	Amino sugar and nucleotide sugar metabolism;Biosynthesis of nucleotide sugars	COG1087	M:Cell wall/membrane/envelope biogenesis	XP_004243634.1	UDP-arabinose 4-epimerase 1 [Solanum lycopersicum]	sp|Q9SA77|ARAE1_ARATH;	UDP-arabinose 4-epimerase 1 OS=Arabidopsis thaliana OX=3702 GN=MUR4 PE=1 SV=1;	PF16363.7;PF01370.23;PF02719.17;PF01073.21;PF04321.19;PF07993.14;PF13460.8;PF00106.27	GDP_Man_Dehyd;Epimerase;Polysacc_synt_2;3Beta_HSD;RmlD_sub_bind;NAD_binding_4;NAD_binding_10;adh_short	GDP-mannose 4,6 dehydratase;NAD dependent epimerase/dehydratase family;Polysaccharide biosynthesis protein;3-beta hydroxysteroid dehydrogenase/isomerase family;RmlD substrate binding domain;Male sterility protein;NA;short chain dehydrogenase
gene_Solyc07g052070.3	Solyc07g052070.3	Cytochrome (AHRD V3.3 *** A0A2G3C1F9_CAPCH)	0.12	0.04	0.13	0.64	1.02	0.28	0.096667	0.646667	GO:0055114;GO:0016021;GO:0004497;GO:0020037;GO:0016705;GO:000550	BP:oxidation-reduction process;CC:integral component of membrane;MF:monooxygenase activity;MF:heme binding;MF:oxidoreductase activity, acting on paired donors, with incorporation or reduction of molecular oxygen;MF:iron ion binding;	------	------	------	------	COG2124	Q:Secondary metabolites biosynthesis, transport and catabolism	XP_004243845.1	cytochrome P450 CYP72A219-like [Solanum lycopersicum]	sp|H2DH21|C7A29_PANGI;	Cytochrome P450 CYP72A219 OS=Panax ginseng OX=4054 PE=2 SV=1;	PF00067.24	p450	Cytochrome P450
gene_Solyc07g052780.3	Solyc07g052780.3	Disease resistance protein (TIR-NBS-LRR class) family (AHRD V3.3 *-* A0A2U1MH42_ARTAN)	0	0.11	0.07	5.64	0.33	2.2	0.06	2.72333	GO:0006952;GO:0007165;GO:0016787;GO:0043531;GO:000551	BP:defense response;BP:signal transduction;MF:hydrolase activity;MF:ADP binding;MF:protein binding;	------	------	------	------	ENOG4112BMQ;ENOG4111THG;COG4886;COG0020	S:Function unknown;I:Lipid transport and metabolism	XP_025887844.1	TMV resistance protein N-like [Solanum lycopersicum]	sp|Q40392|TMVRN_NICGU;	TMV resistance protein N OS=Nicotiana glutinosa OX=35889 GN=N PE=1 SV=1;	PF01582.22;PF13676.8	TIR;TIR_2	TIR domain;TIR domain
gene_Solyc07g052790.3	Solyc07g052790.3	Disease resistance protein (TIR-NBS-LRR class) (AHRD V3.3 *** F4KIC7_ARATH)	0	0	0	5.55	0.51	1.82	0	2.62667	GO:0006952;GO:0007165;GO:0016787;GO:004353	BP:defense response;BP:signal transduction;MF:hydrolase activity;MF:ADP binding;	------	------	------	------	COG4886;COG0020	S:Function unknown;I:Lipid transport and metabolism	XP_025888012.1	TMV resistance protein N [Solanum lycopersicum]	sp|Q40392|TMVRN_NICGU;	TMV resistance protein N OS=Nicotiana glutinosa OX=35889 GN=N PE=1 SV=1;	PF00931.24;PF13855.8;PF20160.1;PF12799.9	NB-ARC;LRR_8;C-JID;LRR_4	NB-ARC domain;Leucine rich repeat;C-JID domain;Leucine Rich repeats
gene_Solyc07g055690.1	Solyc07g055690.1	Lectin-domain receptor-like kinase (AHRD V3.3 *** G4XXY5_NICAT)	0.67	0.52	0.33	3.91	1.13	2.47	0.506667	2.50333	GO:0048544;GO:0016021;GO:0016301;GO:0030246;GO:0106311;GO:0004672;GO:0106310;GO:000552	BP:recognition of pollen;CC:integral component of membrane;MF:kinase activity;MF:carbohydrate binding;MF:old GO;MF:protein kinase activity;MF:old GO;MF:ATP binding;	------	------	------	------	ENOG410YBSH	T:Signal transduction mechanisms	XP_019070503.1	epidermis-specific secreted glycoprotein EP1 [Solanum lycopersicum]	sp|O65238|Y5537_ARATH;	G-type lectin S-receptor-like serine/threonine-protein kinase At5g35370 OS=Arabidopsis thaliana OX=3702 GN=At5g35370 PE=2 SV=2;	PF01453.26;PF00954.22;PF08276.13	B_lectin;S_locus_glycop;PAN_2	D-mannose binding lectin;S-locus glycoprotein domain;PAN-like domain
gene_Solyc07g065900.3	Solyc07g065900.3	Fructose-bisphosphate aldolase (AHRD V3.3 *** A0A200Q3T9_9MAGN)	34.59	65.72	46.83	158.09	130.67	235.23	49.0467	174.663	GO:0006096;GO:000433	BP:glycolytic process;MF:fructose-bisphosphate aldolase activity;	K01623	ALDO	map00010;map00030;map00051;map00710	Glycolysis / Gluconeogenesis;Pentose phosphate pathway;Fructose and mannose metabolism;Carbon fixation in photosynthetic organisms	COG3588	G:Carbohydrate transport and metabolism	NP_001296956.1	fructose-bisphosphate aldolase [Solanum lycopersicum]	sp|O65581|ALFC5_ARATH;	Fructose-bisphosphate aldolase 5, cytosolic OS=Arabidopsis thaliana OX=3702 GN=FBA5 PE=1 SV=1;	PF00274.21	Glycolytic	Fructose-bisphosphate aldolase class-I
gene_Solyc07g160130.1	Solyc07g160130.1	Disease resistance protein (TIR-NBS-LRR class) family (AHRD V3.11 *-* tr|A0A2U1KPA3|A0A2U1KPA3_ARTAN)	0	0	0	2.58	0.45	0.69	0	1.24	GO:0006952;GO:0007165;GO:0016787;GO:004353	BP:defense response;BP:signal transduction;MF:hydrolase activity;MF:ADP binding;	------	------	------	------	COG4886;COG0020	S:Function unknown;I:Lipid transport and metabolism	XP_025888012.1	TMV resistance protein N [Solanum lycopersicum]	sp|A0A290U7C4|ROQ1_NICBE;	Disease resistance protein Roq1 OS=Nicotiana benthamiana OX=4100 GN=ROQ1 PE=1 SV=1;	PF00931.24	NB-ARC	NB-ARC domain
gene_Solyc08g005610.3	Solyc08g005610.3	Cytochrome P450 (AHRD V3.3 *** A0A200R6R4_9MAGN)	46.13	35.28	34.8	88.68	85.23	65.12	38.7367	79.6767	GO:0016125;GO:0009687;GO:0055114;GO:0004497;GO:0020037;GO:0016709;GO:0016705;GO:0005506;GO:001649	BP:sterol metabolic process;BP:abscisic acid metabolic process;BP:oxidation-reduction process;MF:monooxygenase activity;MF:heme binding;MF:oxidoreductase activity, acting on paired donors, with incorporation or reduction of molecular oxygen, NA;MF:oxidoreductase activity, acting on paired donors, with incorporation or reduction of molecular oxygen;MF:iron ion binding;MF:oxidoreductase activity;	K09843	CYP707A	map00906	Carotenoid biosynthesis	COG2124	Q:Secondary metabolites biosynthesis, transport and catabolism	NP_001362844.1	abscisic acid 8'-hydroxylase CYP707A2 [Solanum lycopersicum]	sp|K4CI52|ABAH2_SOLLC;	Abscisic acid 8'-hydroxylase CYP707A2 OS=Solanum lycopersicum OX=4081 GN=CYP707A2 PE=2 SV=1;	PF00067.24	p450	Cytochrome P450
gene_Solyc08g008110.3	Solyc08g008110.3	1-aminocyclopropane-1-carboxylate synthase (AHRD V3.11 *** tr|Q9SAZ4|Q9SAZ4_SOLLC)	19.38	19.1	19.01	37.67	50.16	24.03	19.1633	37.2867	GO:0009058;GO:0003824;GO:0016847;GO:003017	BP:biosynthetic process;MF:catalytic activity;MF:1-aminocyclopropane-1-carboxylate synthase activity;MF:pyridoxal phosphate binding;	K20772	ACS1_2_6	map00270;map04016	Cysteine and methionine metabolism;MAPK signaling pathway - plant	COG0436	E:Amino acid transport and metabolism	NP_001234164.2	1-aminocyclopropane-1-carboxylate synthase [Solanum lycopersicum]	sp|P31531|1A1C_SOYBN;	1-aminocyclopropane-1-carboxylate synthase OS=Glycine max OX=3847 GN=ACS1 PE=2 SV=1;	PF00155.23	Aminotran_1_2	Aminotransferase class I and II
gene_Solyc08g013670.3	Solyc08g013670.3	Photosystem I reaction center subunit N, chloroplastic (AHRD V3.3 *** A0A1U8EZE3_CAPAN)	523.76	876.02	972.56	1398.82	1882.12	1637.28	790.78	1639.41	GO:0015979;GO:0009535;GO:0009522;GO:0030093;GO:0009507;GO:000550	BP:photosynthesis;CC:chloroplast thylakoid membrane;CC:photosystem I;CC:chloroplast photosystem I;CC:chloroplast;MF:copper ion binding;	K02701	psaN	map00195	Photosynthesis	ENOG411281Y	S:Function unknown	NP_001316061.1	photosystem I reaction center subunit [Solanum lycopersicum]	sp|P49107|PSAN_ARATH;	Photosystem I reaction center subunit N, chloroplastic OS=Arabidopsis thaliana OX=3702 GN=PSAN PE=1 SV=2;	PF05479.13	PsaN	Photosystem I reaction centre subunit N
gene_Solyc08g066760.4	Solyc08g066760.4	Ankyrin repeat (AHRD V3.3 *** A0A200QDM7_9MAGN)	1.32	0.6	0.43	2.13	1.88	2.49	0.783333	2.16667	GO:0016021;GO:001602	CC:integral component of membrane;CC:membrane;	------	------	------	------	COG0666	S:Function unknown	KAG5591607.1	hypothetical protein H5410_042121 [Solanum commersonii]	------	------	PF12796.9;PF13606.8;PF13637.8;PF13857.8;PF00023.32	Ank_2;Ank_3;Ank_4;Ank_5;Ank	Ankyrin repeats;Ankyrin repeat;Ankyrin repeats;Ankyrin repeats;Ankyrin repeat
gene_Solyc08g068480.1	Solyc08g068480.1	Auxin-responsive GH3 family protein (AHRD V3.3 *-* A0A2U1MRW5_ARTAN)	8.48	10.04	23.94	32.03	31.23	40.18	14.1533	34.48	GO:0005737;GO:001688	CC:cytoplasm;MF:acid-amino acid ligase activity;	K14487	GH3	map04075	Plant hormone signal transduction	ENOG410XQH0	S:Function unknown	XP_004243319.1	indole-3-acetic acid-amido synthetase GH3.10-like [Solanum lycopersicum]	sp|Q9ZNS2|GH310_ARATH;	Indole-3-acetic acid-amido synthetase GH3.10 OS=Arabidopsis thaliana OX=3702 GN=GH3.10 PE=2 SV=1;	PF03321.15	GH3	GH3 auxin-responsive promoter
gene_Solyc08g068700.1	Solyc08g068700.1	Tyramine n-hydroxycinnamoyl transferase (AHRD V3.3 *** Q5D8C0_CAPAN)	101.73	136.13	128.55	365.36	268.33	358.59	122.137	330.76	GO:0050366;GO:000808	MF:tyramine N-feruloyltransferase activity;MF:N-acetyltransferase activity;	K22246	THT	------	------	COG0454	K:Transcription	NP_001234154.1	N-hydroxycinnamoyl-CoA:tyramine N-hydroxycinnamoyl transferase THT7-1 [Solanum lycopersicum]	sp|Q9SMB8|THT11_TOBAC;	Tyramine N-feruloyltransferase 4/11 OS=Nicotiana tabacum OX=4097 GN=THT4 PE=2 SV=1;	PF00583.27	Acetyltransf_1	Acetyltransferase
gene_Solyc08g068720.1	Solyc08g068720.1	Tyramine N-feruloyltransferase 10/30 (AHRD V3.3 *** A0A2G2W3Q5_CAPBA)	0.21	0.3	0.28	2.48	1.93	1.33	0.263333	1.91333	GO:0050366;GO:000808	MF:tyramine N-feruloyltransferase activity;MF:N-acetyltransferase activity;	K22246	THT	------	------	COG0454	K:Transcription	XP_004245285.1	tyramine N-feruloyltransferase 4/11-like [Solanum lycopersicum]	sp|Q9SMB8|THT11_TOBAC;	Tyramine N-feruloyltransferase 4/11 OS=Nicotiana tabacum OX=4097 GN=THT4 PE=2 SV=1;	PF00583.27	Acetyltransf_1	Acetyltransferase
gene_Solyc08g068730.1	Solyc08g068730.1	Tyramine n-hydroxycinnamoyl transferase (AHRD V3.3 *** Q5D8C0_CAPAN)	6.99	8.03	6.14	25.57	9.06	13.14	7.05333	15.9233	GO:000808	MF:N-acetyltransferase activity;	K22246	THT	------	------	COG0454	K:Transcription	NP_001234877.1	N-hydroxycinnamoyl-CoA:tyramine N-hydroxycinnamoyl transferase THT1-3 [Solanum lycopersicum]	sp|Q9SMB8|THT11_TOBAC;	Tyramine N-feruloyltransferase 4/11 OS=Nicotiana tabacum OX=4097 GN=THT4 PE=2 SV=1;	PF00583.27	Acetyltransf_1	Acetyltransferase
gene_Solyc08g074650.4	Solyc08g074650.4	Polyphenol oxidase (AHRD V3.3 *** R4JDV1_TOBAC)	0.04	0.44	0.1	1.82	6.26	0.32	0.193333	2.8	GO:0046148;GO:0009543;GO:0016491;GO:0046872;GO:000409	BP:pigment biosynthetic process;CC:chloroplast thylakoid lumen;MF:oxidoreductase activity;MF:metal ion binding;MF:catechol oxidase activity;	K00422	E1.10.3.1	map00950;map00350	Isoquinoline alkaloid biosynthesis;Tyrosine metabolism	ENOG410ZP9M;ENOG410XS94	S:Function unknown;G:Carbohydrate transport and metabolism	XP_015083938.2	catechol oxidase B, chloroplastic-like [Solanum pennellii]	sp|Q06355|PPOB_SOLTU;	Catechol oxidase B, chloroplastic;	PF00264.22;PF12143.10;PF12142.10	Tyrosinase;PPO1_KFDV;PPO1_DWL	Common central domain of tyrosinase;Protein of unknown function;Polyphenol oxidase middle domain
gene_Solyc08g076620.1	Solyc08g076620.1	Eukaryotic aspartyl protease family protein (AHRD V3.3 *** A0A2U1KXX4_ARTAN)	0.05	0.15	0.17	0.77	1.26	0.18	0.123333	0.736667	GO:000419	MF:aspartic-type endopeptidase activity;	------	------	------	------	ENOG410XNV7;ENOG410XR70	O:Posttranslational modification, protein turnover, chaperones;S:Function unknown	XP_025888172.1	basic 7S globulin-like [Solanum lycopersicum]	sp|P0DO21|GIP2_NICBE;	Probable aspartic proteinase GIP2 OS=Nicotiana benthamiana OX=4100 GN=GIP2 PE=1 SV=1;	PF14541.8;PF14543.8	TAXi_C;TAXi_N	Xylanase inhibitor C-terminal;Xylanase inhibitor N-terminal
gene_Solyc08g077380.4	Solyc08g077380.4	Purine permease (AHRD V3.3 *** A0A2P5BSS2_TREOI),Pfam:PF16913	2.86	2.46	2.99	6.92	6.3	8.3	2.77	7.17333	GO:0016021;GO:001521	CC:integral component of membrane;MF:purine nucleoside transmembrane transporter activity;	------	------	------	------	ENOG410YEZY	S:Function unknown	XP_004246178.1	probable purine permease 11 [Solanum lycopersicum]	sp|Q9LPF6|PUP11_ARATH;	Probable purine permease 11 OS=Arabidopsis thaliana OX=3702 GN=PUP11 PE=1 SV=1;	PF16913.7	PUNUT	Purine nucleobase transmembrane transport
gene_Solyc08g078450.3	Solyc08g078450.3	Exostosin-like (AHRD V3.3 *** A0A200PV90_9MAGN)	0	0.1	0.11	0.3	0.3	0.62	0.07	0.406667	GO:0006486;GO:0016021;GO:0000139;GO:001675	BP:protein glycosylation;CC:integral component of membrane;CC:Golgi membrane;MF:transferase activity, transferring glycosyl groups;	------	------	------	------	ENOG410XTFH	S:Function unknown	XP_025888194.1	probable glycosyltransferase At5g03795 isoform X1 [Solanum lycopersicum]	sp|Q9FFN2|GLYT3_ARATH;	Probable glycosyltransferase At5g03795 OS=Arabidopsis thaliana OX=3702 GN=At5g03795 PE=3 SV=2;	PF03016.17	Exostosin	Exostosin family
gene_Solyc08g078870.3	Solyc08g078870.3	Bifunctional inhibitor/lipid-transfer protein/seed storage 2S albumin superfamily protein (AHRD V3.3 *** A0A2U1PU47_ARTAN)	31.59	43.16	29.71	120.36	73.86	95.87	34.82	96.6967	------	------	------	------	------	------	ENOG410ZMQE	S:Function unknown	XP_004245752.1	14 kDa proline-rich protein DC2.15-like [Solanum lycopersicum]	sp|P14009|14KD_DAUCA;	14 kDa proline-rich protein DC2.15 OS=Daucus carota OX=4039 PE=2 SV=1;	PF14547.8;PF00234.24;PF14368.8	Hydrophob_seed;Tryp_alpha_amyl;LTP_2	Hydrophobic seed protein;Protease inhibitor/seed storage/LTP family;Probable lipid transfer
gene_Solyc08g079315.1	Solyc08g079315.1	Cytochrome P450 (AHRD V3.3 *-* A0A1U9X605_THAGA)	0.52	0.56	0.59	1.23	1.47	2.04	0.556667	1.58	GO:0055114;GO:0016021;GO:0004497;GO:0020037;GO:0016705;GO:000550	BP:oxidation-reduction process;CC:integral component of membrane;MF:monooxygenase activity;MF:heme binding;MF:oxidoreductase activity, acting on paired donors, with incorporation or reduction of molecular oxygen;MF:iron ion binding;	------	------	------	------	COG2124	Q:Secondary metabolites biosynthesis, transport and catabolism	XP_006355524.1	PREDICTED: geraniol 8-hydroxylase-like [Solanum tuberosum]	sp|O04773|C75A6_CAMME;	Flavonoid 3',5'-hydroxylase OS=Campanula medium OX=56154 GN=CYP75A6 PE=2 SV=1;	PF00067.24	p450	Cytochrome P450
gene_Solyc08g079870.3	Solyc08g079870.3	subtilisin	97.05	56.96	52.42	278.83	75.62	189.83	68.81	181.427	GO:0006508;GO:000425	BP:proteolysis;MF:serine-type endopeptidase activity;	------	------	------	------	COG1404	O:Posttranslational modification, protein turnover, chaperones	NP_001233982.1	subtilisin-like protease precursor [Solanum lycopersicum]	sp|A9QY38|SBT4_LOTJA;	Subtilisin-like protease 4 OS=Lotus japonicus OX=34305 GN=SBTM4 PE=2 SV=1;	PF00082.24;PF17766.3;PF02225.24;PF05922.18	Peptidase_S8;fn3_6;PA;Inhibitor_I9	Subtilase family;Fibronectin type-III domain;PA domain;Peptidase inhibitor I9
gene_Solyc08g080570.4	Solyc08g080570.4	UDP-glucose 4-epimerase-like protein (AHRD V3.3 *** A0A2K3NI12_TRIPR)	110.66	114.17	92.9	177.23	240.31	216.89	105.91	211.477	GO:0006012;GO:0006364;GO:0005829;GO:0003978;GO:000372	BP:galactose metabolic process;BP:rRNA processing;CC:cytosol;MF:UDP-glucose 4-epimerase activity;MF:RNA binding;	K01784	galE, GALE	map00520;map01250;map00052	Amino sugar and nucleotide sugar metabolism;Biosynthesis of nucleotide sugars;Galactose metabolism	COG1087	M:Cell wall/membrane/envelope biogenesis	XP_004245634.1	bifunctional UDP-glucose 4-epimerase and UDP-xylose 4-epimerase 1 [Solanum lycopersicum]	sp|Q42605|UGE1_ARATH;	Bifunctional UDP-glucose 4-epimerase and UDP-xylose 4-epimerase 1 OS=Arabidopsis thaliana OX=3702 GN=UGE1 PE=1 SV=2;	PF16363.7;PF01370.23;PF02719.17;PF01073.21;PF04321.19;PF00106.27;PF13460.8;PF08659.12;PF07993.14	GDP_Man_Dehyd;Epimerase;Polysacc_synt_2;3Beta_HSD;RmlD_sub_bind;adh_short;NAD_binding_10;KR;NAD_binding_4	GDP-mannose 4,6 dehydratase;NAD dependent epimerase/dehydratase family;Polysaccharide biosynthesis protein;3-beta hydroxysteroid dehydrogenase/isomerase family;RmlD substrate binding domain;short chain dehydrogenase;NA;KR domain;Male sterility protein
gene_Solyc09g005120.3	Solyc09g005120.3	DnaJ protein ERDJ3A (AHRD V3.3 *** A0A2G2VZ69_CAPBA)	15.49	13.9	17.02	26.88	36.82	26.18	15.47	29.96	GO:0009408;GO:0009860;GO:0009506;GO:0005788;GO:001649	BP:response to heat;BP:pollen tube growth;CC:plasmodesma;CC:endoplasmic reticulum lumen;MF:oxidoreductase activity;	------	------	------	------	COG0484;COG2214	O:Posttranslational modification, protein turnover, chaperones;	XP_004246777.1	dnaJ protein ERDJ3A [Solanum lycopersicum]	sp|Q9SR96|DNJ63_ARATH;	DnaJ protein ERDJ3A OS=Arabidopsis thaliana OX=3702 GN=ERDJ3A PE=1 SV=1;	PF00226.33;PF13848.8	DnaJ;Thioredoxin_6	DnaJ domain;Thioredoxin-like domain
gene_Solyc09g007840.3	Solyc09g007840.3	Cyclic nucleotide-gated channel 15 (AHRD V3.3 *** A0A2U1M7X5_ARTAN)	0.39	0.58	0.41	1.1	0.88	1.21	0.46	1.06333	GO:0006811;GO:0055085;GO:0016020;GO:0016021;GO:0005216;GO:000524	BP:ion transport;BP:transmembrane transport;CC:membrane;CC:integral component of membrane;MF:ion channel activity;MF:voltage-gated potassium channel activity;	K05391	CNGC	map04626	Plant-pathogen interaction	ENOG410XPSE	U:Intracellular trafficking, secretion, and vesicular transport	XP_004246915.2	protein CNGC15b-like [Solanum lycopersicum]	sp|G7IBJ4|CN15A_MEDTR;	Protein CNGC15a OS=Medicago truncatula OX=3880 GN=CNGC15A PE=1 SV=1;	PF00520.33;PF00027.31	Ion_trans;cNMP_binding	Ion transport protein;Cyclic nucleotide-binding domain
gene_Solyc09g008560.5	Solyc09g008560.5	2-oxoglutarate (2OG) and Fe(II)-dependent oxygenase superfamily protein (AHRD V3.11 *** tr|F4INZ9|F4INZ9_ARATH)	0.92	1.77	0.73	2.17	2	3.51	1.14	2.56	GO:0031418;GO:0046872;GO:001649	MF:L-ascorbic acid binding;MF:metal ion binding;MF:oxidoreductase activity;	------	------	------	------	COG3491	S:Function unknown	NP_001353341.1	putative 2OG-Fe(II) oxygenase GIM2-like [Solanum lycopersicum]	sp|Q6YYX9|SLC1_ORYSJ;	Probable 2-oxoglutarate-dependent dioxygenase SLC1 OS=Oryza sativa subsp. japonica OX=39947 GN=SLC1 PE=2 SV=1;	PF03171.22;PF14226.8	2OG-FeII_Oxy;DIOX_N	2OG-F;non-haem dioxygenase in morphine synthesis N-terminal
gene_Solyc09g011490.3	Solyc09g011490.3	Glutathione S-transferase (AHRD V3.3 *** C0LF68_CAPAN)	13.91	15.48	17.93	38.84	25.57	29.87	15.7733	31.4267	GO:0006749;GO:0005737;GO:0016740;GO:0004364;GO:000551	BP:glutathione metabolic process;CC:cytoplasm;MF:transferase activity;MF:glutathione transferase activity;MF:protein binding;	K00799	GST, gst	map00480	Glutathione metabolism	ENOG410XSIX	O:Posttranslational modification, protein turnover, chaperones	XP_004246388.1	probable glutathione S-transferase [Solanum lycopersicum]	sp|Q03662|GSTX1_TOBAC;	Probable glutathione S-transferase OS=Nicotiana tabacum OX=4097 PE=2 SV=1;	PF02798.22;PF13417.8;PF00043.27;PF13409.8;PF17172.6	GST_N;GST_N_3;GST_C;GST_N_2;GST_N_4	Glutathione S-transferase, N-terminal domain;Glutathione S-transferase, N-terminal domain;Glutathione S-transferase, C-terminal domain;Glutathione S-transferase, N-terminal domain;Glutathione S-transferase N-terminal domain
gene_Solyc09g057960.1	Solyc09g057960.1	Cysteine-rich receptor-like protein kinase (AHRD V3.3 *-* A0A2K3KZ48_TRIPR)	1.47	1.43	1.17	3.56	2.63	4.22	1.35667	3.47	------	------	------	------	------	------	ENOG410YD44	S:Function unknown	XP_004247276.1	cysteine-rich repeat secretory protein 55 [Solanum lycopersicum]	sp|Q9LV60|CRR55_ARATH;	Cysteine-rich repeat secretory protein 55 OS=Arabidopsis thaliana OX=3702 GN=CRRSP55 PE=2 SV=1;	PF01657.19	Stress-antifung	Salt stress response/antifungal
gene_Solyc09g059430.3	Solyc09g059430.3	RPM1-interacting protein 4 (AHRD V3.3 *** A0A1P8SF00_NICBE)	13.97	14.84	14.9	31.39	25.54	26.28	14.57	27.7367	GO:000588	CC:plasma membrane;	K13456	RIN4	map04626	Plant-pathogen interaction	ENOG410YR29	S:Function unknown	XP_010326285.1	RPM1-interacting protein 4 isoform X2 [Solanum lycopersicum]	sp|Q8GYN5|RIN4_ARATH;	RPM1-interacting protein 4 OS=Arabidopsis thaliana OX=3702 GN=RIN4 PE=1 SV=1;	PF05627.13	AvrRpt-cleavage	Cleavage site for pathogenic type III effector avirulence factor Avr
gene_Solyc09g075210.3	Solyc09g075210.3	Late embryogenesis abundant protein Lea5 (AHRD V3.3 *** A0A1J3JXG8_NOCCA)	30.14	31.54	20.14	68.7	54.3	82.71	27.2733	68.57	GO:000573	CC:mitochondrion;	------	------	------	------	ENOG410ZEWF	S:Function unknown	NP_001333873.1	indole-3-acetic acid-induced protein ARG2 [Solanum lycopersicum]	sp|Q93WF6|SAG21_ARATH;	Protein SENESCENCE-ASSOCIATED GENE 21, mitochondrial OS=Arabidopsis thaliana OX=3702 GN=SAG21 PE=2 SV=1;	PF03242.15	LEA_3	Late embryogenesis abundant protein
gene_Solyc09g083130.3	Solyc09g083130.3	Acylamino-acid-releasing enzyme (AHRD V3.3 *** A0A1J3E2A0_NOCCA)	33.07	33.1	25.62	56.39	53.94	71.09	30.5967	60.4733	GO:0006508;GO:0004252;GO:000823	BP:proteolysis;MF:serine-type endopeptidase activity;MF:serine-type peptidase activity;	K01303	APEH	------	------	COG1506	E:Amino acid transport and metabolism	XP_010326709.1	acylamino-acid-releasing enzyme-like isoform X1 [Solanum lycopersicum]	sp|Q84LM4|AARE_ARATH;	Acylamino-acid-releasing enzyme OS=Arabidopsis thaliana OX=3702 GN=AARE PE=1 SV=1;	PF19283.1;PF00326.23;PF00561.22;PF12146.10;PF01738.20;PF00135.30;PF07859.15;PF12697.9	APEH_N;Peptidase_S9;Abhydrolase_1;Hydrolase_4;DLH;COesterase;Abhydrolase_3;Abhydrolase_6	Acylamino-acid-releasing enzyme, N-terminal domain;Prolyl oligopeptidase family;alpha/beta hydrolase fold;Serine aminopeptidase, S33;Dienelactone hydrolase family;Carboxylesterase family;alpha/beta hydrolase fold;Alpha/beta hydrolase family
gene_Solyc09g083360.3	Solyc09g083360.3	Transcription factor bHLH92 (AHRD V3.3 *** A0A2G2ZV24_CAPAN)	3.91	3.08	2.86	7.17	13.99	3.02	3.28333	8.06	GO:0005634;GO:0046983;GO:000097	CC:nucleus;MF:protein dimerization activity;MF:transcription regulatory region sequence-specific DNA binding;	------	------	------	------	ENOG410YV10;COG0185	K:Transcription;J:Translation, ribosomal structure and biogenesis	XP_004247648.1	transcription factor bHLH92 isoform X1 [Solanum lycopersicum]	sp|Q08112|RS151_ARATH;	40S ribosomal protein S15-1 OS=Arabidopsis thaliana OX=3702 GN=RPS15A PE=2 SV=1;	PF00010.28	HLH	Helix-loop-helix DNA-binding domain
gene_Solyc09g090470.3	Solyc09g090470.3	Protein NRT1/ PTR FAMILY 5.2 (AHRD V3.3 *** A0A2G3CS67_CAPCH)	5.68	6.39	7.62	21.09	12.21	17.72	6.56333	17.0067	GO:0006817;GO:0055085;GO:0016021;GO:0016020;GO:0042937;GO:002285	BP:phosphate ion transport;BP:transmembrane transport;CC:integral component of membrane;CC:membrane;MF:tripeptide transporter activity;MF:transmembrane transporter activity;	------	------	------	------	COG3104	E:Amino acid transport and metabolism	XP_004247757.1	protein NRT1/ PTR FAMILY 5.2 isoform X1 [Solanum lycopersicum]	sp|Q9FNL7|PTR3_ARATH;	Protein NRT1/ PTR FAMILY 5.2 OS=Arabidopsis thaliana OX=3702 GN=NPF5.2 PE=2 SV=1;	PF00854.23	PTR2	POT family
gene_Solyc09g091660.3	Solyc09g091660.3	Pleiotropic drug resistance protein (AHRD V3.3 *** C8CA13_CUCSA)	124.09	85.51	80.56	209.33	146.35	190.43	96.72	182.037	GO:0016020;GO:0016021;GO:0042626;GO:000552	CC:membrane;CC:integral component of membrane;MF:ATPase activity, coupled to transmembrane movement of substances;MF:ATP binding;	K08711	PDR, CDR1	map02010	ABC transporters	COG1131;COG0842	V:Defense mechanisms;	XP_004247841.1	pleiotropic drug resistance protein 1 [Solanum lycopersicum]	sp|Q76CU2|PDR1_TOBAC;	Pleiotropic drug resistance protein 1 OS=Nicotiana tabacum OX=4097 GN=PDR1 PE=2 SV=1;	PF01061.26;PF00005.29;PF08370.13;PF19055.2;PF13304.8;PF14510.8	ABC2_membrane;ABC_tran;PDR_assoc;ABC2_membrane_7;AAA_21;ABC_trans_N	ABC-2 type transporter;ABC transporter;Plant PDR ABC transporter associated;ABC-2 type transporter;AAA domain, putative AbiEii toxin, Type IV TA system;ABC-transporter N-terminal
gene_Solyc09g098530.5	Solyc09g098530.5	phosphoribosylformylglycinamidine synthase Chr2:17968910-17970822 REVERSE LENGTH=437 201606 (AHRD V3.11 *** AT2G43235.1)	13.85	10.13	11.25	25.07	17.37	27.2	11.7433	23.2133	GO:001602	CC:integral component of membrane;	------	------	------	------	ENOG4111NR0	S:Function unknown	XP_015087648.1	uncharacterized protein LOC107030947 [Solanum pennellii]	sp|Q9MA41|CTL1_ARATH;	Chitinase-like protein 1 OS=Arabidopsis thaliana OX=3702 GN=CTL1 PE=1 SV=1;	------	------	------
gene_Solyc09g098770.2	Solyc09g098770.2	Geraniol 8-hydroxylase (AHRD V3.3 *** A0A2G3CQY8_CAPCH)	2.42	2.04	2.29	4.57	3.25	5.42	2.25	4.41333	GO:0055114;GO:0016021;GO:0004497;GO:0020037;GO:0016705;GO:000550	BP:oxidation-reduction process;CC:integral component of membrane;MF:monooxygenase activity;MF:heme binding;MF:oxidoreductase activity, acting on paired donors, with incorporation or reduction of molecular oxygen;MF:iron ion binding;	------	------	------	------	COG2124	Q:Secondary metabolites biosynthesis, transport and catabolism	XP_019071147.2	LOW QUALITY PROTEIN: geraniol 8-hydroxylase [Solanum lycopersicum]	sp|Q8VWZ7|C76B6_CATRO;	Geraniol 8-hydroxylase OS=Catharanthus roseus OX=4058 GN=CYP76B6 PE=1 SV=1;	PF00067.24	p450	Cytochrome P450
gene_Solyc10g009270.3	Solyc10g009270.3	bHLH transcription factor154	0.4	0.89	0.44	1.93	5.55	0.8	0.576667	2.76	GO:0006355;GO:0005634;GO:0003700;GO:0046983;GO:000097	BP:regulation of transcription, DNA-templated;CC:nucleus;MF:transcription factor activity, sequence-specific DNA binding;MF:protein dimerization activity;MF:transcription regulatory region sequence-specific DNA binding;	------	------	------	------	ENOG410Y9TK	K:Transcription	XP_004248095.1	transcription factor MYC2-like [Solanum lycopersicum]	sp|O23090|BH014_ARATH;	Transcription factor bHLH14 OS=Arabidopsis thaliana OX=3702 GN=BHLH14 PE=1 SV=1;	PF14215.8;PF00010.28	bHLH-MYC_N;HLH	bHLH-MYC and R2R3-MYB transcription factors N-terminal;Helix-loop-helix DNA-binding domain
gene_Solyc10g017960.2	Solyc10g017960.2	F-box protein PP2-A15 (AHRD V3.3 *** A0A2G3AGV7_CAPAN)	0.56	0.96	0.66	1.93	1.97	1.54	0.726667	1.81333	------	------	------	------	------	------	ENOG410Y934;ENOG410YE99	S:Function unknown;	XP_004248570.1	F-box protein PP2-A13 [Solanum lycopersicum]	sp|Q9LEX0|P2A13_ARATH;	F-box protein PP2-A13 OS=Arabidopsis thaliana OX=3702 GN=PP2A13 PE=1 SV=1;	PF14299.8	PP2	Phloem protein 2
gene_Solyc10g018300.3	Solyc10g018300.3	Transketolase (AHRD V3.3 *** A0A200R9X0_9MAGN)	226.19	346.32	305.4	545.64	486.41	634.23	292.637	555.427	GO:0006098;GO:0019253;GO:0009535;GO:0005829;GO:0004802;GO:004687	BP:pentose-phosphate shunt;BP:reductive pentose-phosphate cycle;CC:chloroplast thylakoid membrane;CC:cytosol;MF:transketolase activity;MF:metal ion binding;	K00615	E2.2.1.1, tktA, tktB	map00030;map00710	Pentose phosphate pathway;Carbon fixation in photosynthetic organisms	COG0021	G:Carbohydrate transport and metabolism	XP_004248560.1	transketolase, chloroplastic [Solanum lycopersicum]	sp|Q43848|TKTC_SOLTU;	Transketolase, chloroplastic OS=Solanum tuberosum OX=4113 PE=2 SV=1;	PF00456.23;PF02779.26;PF02780.22	Transketolase_N;Transket_pyr;Transketolase_C	Transketolase, thiamine diphosphate binding domain;Transketolase, pyrimidine binding domain;Transketolase, C-terminal domain
gene_Solyc10g050460.1	Solyc10g050460.1	Unknown protein	0.71	0.35	0.7	3.32	1.75	4.67	0.586667	3.24667	GO:0016021;GO:000827	CC:integral component of membrane;MF:zinc ion binding;	------	------	------	------	ENOG410YRMU	S:Function unknown	KAG5611524.1	hypothetical protein H5410_022805 [Solanum commersonii]	------	------	------	------	------
gene_Solyc10g075110.2	Solyc10g075110.2	Non-specific lipid-transfer protein (AHRD V3.3 *** M1AVB9_SOLTU)	13.55	4.38	2.27	25.69	14.05	49.15	6.73333	29.63	GO:0006869;GO:0016020;GO:000828	BP:lipid transport;CC:membrane;MF:lipid binding;	------	------	------	------	ENOG410YWBC	U:Intracellular trafficking, secretion, and vesicular transport	NP_001234074.1	non-specific lipid-transfer protein 1 precursor [Solanum lycopersicum]	sp|P27056|NLTP1_SOLLC;	Non-specific lipid-transfer protein 1 OS=Solanum lycopersicum OX=4081 GN=TSW12 PE=2 SV=1;	PF00234.24;PF14368.8	Tryp_alpha_amyl;LTP_2	Protease inhibitor/seed storage/LTP family;Probable lipid transfer
gene_Solyc10g076500.3	Solyc10g076500.3	receptor-like protein 12 (AHRD V3.3 *-* A0A1S4CLL9_TOBAC)	0.34	0.68	0.42	2.04	1.04	1.89	0.48	1.65667	GO:0016021;GO:0005886;GO:000551	CC:integral component of membrane;CC:plasma membrane;MF:protein binding;	------	------	------	------	COG4886	S:Function unknown	XP_004249716.1	receptor like protein 22-like [Solanum lycopersicum]	sp|Q9SRL7|RLP35_ARATH;	Receptor-like protein 35 OS=Arabidopsis thaliana OX=3702 GN=RLP35 PE=3 SV=1;	PF13855.8;PF12799.9	LRR_8;LRR_4	Leucine rich repeat;Leucine Rich repeats
gene_Solyc10g083690.3	Solyc10g083690.3	Cytochrome P450 (AHRD V3.3 *** Q8H0I8_PETHY)	0.4	0.49	0.39	1.77	0.69	2.2	0.426667	1.55333	GO:0055114;GO:0016021;GO:0004497;GO:0020037;GO:0016705;GO:000550	BP:oxidation-reduction process;CC:integral component of membrane;MF:monooxygenase activity;MF:heme binding;MF:oxidoreductase activity, acting on paired donors, with incorporation or reduction of molecular oxygen;MF:iron ion binding;	K22983	CYP76A	------	------	COG2124	Q:Secondary metabolites biosynthesis, transport and catabolism	XP_004249462.1	cytochrome P450 76A2-like [Solanum lycopersicum]	sp|P37122|C76A2_SOLME;	Cytochrome P450 76A2 OS=Solanum melongena OX=4111 GN=CYP76A2 PE=2 SV=1;	PF00067.24	p450	Cytochrome P450
gene_Solyc10g086380.1	Solyc10g086380.1	Transcription factor GRAS (AHRD V3.3 *** A0A200PU13_9MAGN)	1.85	2.58	1.82	5.36	1.85	5.81	2.08333	4.34	GO:0042538;GO:0009740;GO:0006355;GO:0009737;GO:0009867;GO:2000377;GO:0009723;GO:0010187;GO:2000033;GO:0009938;GO:0009863;GO:0005634;GO:0043565;GO:0003700;GO:000371	BP:hyperosmotic salinity response;BP:gibberellic acid mediated signaling pathway;BP:regulation of transcription, DNA-templated;BP:response to abscisic acid;BP:jasmonic acid mediated signaling pathway;BP:regulation of reactive oxygen species metabolic process;BP:response to ethylene;BP:negative regulation of seed germination;BP:regulation of seed dormancy process;BP:negative regulation of gibberel…	K14494	DELLA	map04075	Plant hormone signal transduction	ENOG410YBFY	K:Transcription	XP_004249633.3	DELLA protein GAI [Solanum lycopersicum]	sp|Q7Y1B6|GAI_SOLLC;	DELLA protein GAI OS=Solanum lycopersicum OX=4081 GN=GAI PE=2 SV=1;	PF03514.16	GRAS	GRAS domain family
gene_Solyc10g086565.2	Solyc10g086565.2	S-acyltransferase (AHRD V3.3 *** A0A2G2VTM9_CAPBA)	2.36	2.73	4.1	4.88	8.46	4.95	3.06333	6.09667	GO:0018230;GO:0006612;GO:0005794;GO:0005783;GO:0016021;GO:001970	BP:peptidyl-L-cysteine S-palmitoylation;BP:protein targeting to membrane;CC:Golgi apparatus;CC:endoplasmic reticulum;CC:integral component of membrane;MF:protein-cysteine S-palmitoyltransferase activity;	K20029	ZDHHC3_7_25	------	------	COG5273	S:Function unknown	XP_010312359.1	probable protein S-acyltransferase 16 isoform X3 [Solanum lycopersicum]	sp|Q93VV0|ZDHC6_ARATH;	Probable protein S-acyltransferase 16 OS=Arabidopsis thaliana OX=3702 GN=PAT16 PE=2 SV=1;	PF01529.22	DHHC	DHHC palmitoyltransferase
gene_Solyc10g086570.3	Solyc10g086570.3	transmembrane protein (AHRD V3.3 *** AT5G02160.1)	127.96	193.5	336.59	399.74	534.77	489.68	219.35	474.73	GO:0009535;GO:001602	CC:chloroplast thylakoid membrane;CC:integral component of membrane;	------	------	------	------	ENOG4111VYF	S:Function unknown	NP_001234311.1	uncharacterized protein LOC778362 [Solanum lycopersicum]	------	------	------	------	------
gene_Solyc11g005630.1	Solyc11g005630.1	G-type lectin S-receptor-like serine/threonine-protein kinase LECRK3 (AHRD V3.3 *** A0A2I4HSV3_9ROSI)	34.54	33.1	32.93	79.09	40.48	60.73	33.5233	60.1	GO:0006468;GO:0048544;GO:0016021;GO:0030246;GO:0005524;GO:0004672;GO:0106310;GO:010631	BP:protein phosphorylation;BP:recognition of pollen;CC:integral component of membrane;MF:carbohydrate binding;MF:ATP binding;MF:protein kinase activity;MF:old GO;MF:old GO;	------	------	------	------	ENOG410YFGD;COG0515	U:Intracellular trafficking, secretion, and vesicular transport;T:Signal transduction mechanisms	XP_004249884.2	G-type lectin S-receptor-like serine/threonine-protein kinase LECRK3, partial [Solanum lycopersicum]	sp|Q25AG3|LERK3_ORYSI;	G-type lectin S-receptor-like serine/threonine-protein kinase LECRK3 OS=Oryza sativa subsp. indica OX=39946 GN=LECRK3 PE=3 SV=2;	PF00069.27;PF07714.19;PF01453.26;PF00954.22;PF03109.18;PF08276.13	Pkinase;PK_Tyr_Ser-Thr;B_lectin;S_locus_glycop;ABC1;PAN_2	Protein kinase domain;Protein tyrosine and serine/threonine kinase;D-mannose binding lectin;S-locus glycoprotein domain;ABC1 atypical kinase-like domain;PAN-like domain
gene_Solyc11g006730.1	Solyc11g006730.1	Germin (AHRD V3.3 *** A0A200QHW9_9MAGN)	0.62	0.12	0.66	2.21	2.02	3.27	0.466667	2.5	GO:0048046;GO:0005618;GO:0030145;GO:004573	CC:apoplast;CC:cell wall;MF:manganese ion binding;MF:nutrient reservoir activity;	------	------	------	------	ENOG410YPZ1	S:Function unknown	XP_010312518.1	putative germin-like protein 9-2 [Solanum lycopersicum]	sp|Q652Q0|GL92_ORYSJ;	Putative germin-like protein 9-2 OS=Oryza sativa subsp. japonica OX=39947 GN=Os09g0568600 PE=3 SV=1;	PF00190.24;PF07883.13	Cupin_1;Cupin_2	Cupin;Cupin domain
gene_Solyc11g007030.3	Solyc11g007030.3	Alpha/beta-Hydrolases superfamily protein (AHRD V3.3 *** A0A2U1MAY4_ARTAN)	2.23	1.78	1.55	6.72	3.55	4.32	1.85333	4.86333	------	------	------	------	------	------	ENOG4111QDI	S:Function unknown	XP_015170771.1	PREDICTED: uncharacterized protein LOC102603800 isoform X2 [Solanum tuberosum]	------	------	PF12697.9;PF00561.22;PF12146.10	Abhydrolase_6;Abhydrolase_1;Hydrolase_4	Alpha/beta hydrolase family;alpha/beta hydrolase fold;Serine aminopeptidase, S33
gene_Solyc11g007980.2	Solyc11g007980.2	Cytochrome (AHRD V3.3 *** A0A1U8F0H8_CAPAN)	0.96	0.61	0.2	6.55	0.86	4.88	0.59	4.09667	GO:0055114;GO:0005506;GO:0016705;GO:0004497;GO:002003	BP:oxidation-reduction process;MF:iron ion binding;MF:oxidoreductase activity, acting on paired donors, with incorporation or reduction of molecular oxygen;MF:monooxygenase activity;MF:heme binding;	K15805	EAH	map00909	Sesquiterpenoid and triterpenoid biosynthesis	COG2124	Q:Secondary metabolites biosynthesis, transport and catabolism	XP_004250027.1	cytochrome P450 71D7 [Solanum lycopersicum]	sp|P93531|C71D7_SOLCH;	Cytochrome P450 71D7 OS=Solanum chacoense OX=4108 GN=CYP71D7 PE=3 SV=1;	PF00067.24	p450	Cytochrome P450
gene_Solyc11g008480.2	Solyc11g008480.2	Photosystem II PsbP (AHRD V3.3 *** A0A200Q1H1_9MAGN)	2.89	7.18	8.69	11.64	12.51	15.52	6.25333	13.2233	GO:0015979;GO:0009535;GO:0009523;GO:0016021;GO:0019898;GO:0009654;GO:000550	BP:photosynthesis;CC:chloroplast thylakoid membrane;CC:photosystem II;CC:integral component of membrane;CC:extrinsic component of membrane;CC:photosystem II oxygen evolving complex;MF:calcium ion binding;	------	------	------	------	ENOG4111T2I	S:Function unknown	XP_004250063.1	psbP domain-containing protein 7, chloroplastic isoform X1 [Solanum lycopersicum]	sp|F4J7A7|PPD7_ARATH;	PsbP domain-containing protein 7, chloroplastic OS=Arabidopsis thaliana OX=3702 GN=PPD7 PE=2 SV=1;	PF01789.18	PsbP	PsbP
gene_Solyc11g022530.3	Solyc11g022530.3	Late embryogenesis abundant domain-containing protein / LEA domain-containing protein (AHRD V3.3 *-* Q9C7H3_ARATH)	0.75	0.42	0.87	2.59	2.39	1.59	0.68	2.19	GO:001602	CC:integral component of membrane;	------	------	------	------	ENOG4111HFX	S:Function unknown	XP_004250627.1	uncharacterized protein LOC101264586 [Solanum lycopersicum]	sp|Q5REM8|TM205_PONAB;	Transmembrane protein 205 OS=Pongo abelii OX=9601 GN=TMEM205 PE=2 SV=1;	PF13664.8;PF01442.20	DUF4149;Apolipoprotein	Domain of unknown function;Apolipoprotein A1/A4/E domain
gene_Solyc11g064750.3	Solyc11g064750.3	Pentatricopeptide repeat (AHRD V3.3 *** A0A200PRW4_9MAGN)	1.51	3.73	5.63	7.73	6.67	10.26	3.62333	8.22	------	------	------	------	------	------	ENOG410Z7Z7	S:Function unknown	XP_010313231.1	pentatricopeptide repeat-containing protein At2g42920, chloroplastic isoform X2 [Solanum lycopersicum]	sp|Q9SJG6|PP200_ARATH;	Pentatricopeptide repeat-containing protein At2g42920, chloroplastic OS=Arabidopsis thaliana OX=3702 GN=PCMP-E75 PE=2 SV=1;	PF01535.22;PF13041.8;PF12854.9;PF13812.8;PF17177.6	PPR;PPR_2;PPR_1;PPR_3;PPR_long	PPR repeat;PPR repeat family;PPR repeat;Pentatricopeptide repeat domain;Pentacotripeptide-repeat region of PRORP
gene_Solyc11g066250.2	Solyc11g066250.2	Carboxypeptidase (AHRD V3.3 *** A0A1U8EWA6_CAPAN)	25.52	29.02	27.89	63.73	47.65	63.05	27.4767	58.1433	GO:0006508;GO:0005773;GO:0005576;GO:000418	BP:proteolysis;CC:vacuole;CC:extracellular region;MF:serine-type carboxypeptidase activity;	K16298	SCPL-IV	------	------	COG2939	E:Amino acid transport and metabolism	XP_004250970.1	serine carboxypeptidase-like [Solanum lycopersicum]	sp|Q56WF8|SCP48_ARATH;	Serine carboxypeptidase-like 48 OS=Arabidopsis thaliana OX=3702 GN=SCPL48 PE=2 SV=2;	PF00450.24	Peptidase_S10	Serine carboxypeptidase
gene_Solyc11g069020.4	Solyc11g069020.4	Disease resistance protein (AHRD V3.11 *** tr|A0A2U1N8H9|A0A2U1N8H9_ARTAN)	1.25	1.65	1.11	4.13	2.92	4.35	1.33667	3.8	GO:0006952;GO:004353	BP:defense response;MF:ADP binding;	------	------	------	------	COG4886	S:Function unknown	XP_025883969.1	putative late blight resistance protein homolog R1A-10 [Solanum lycopersicum]	sp|Q60CZ8|R1A10_SOLDE;	Putative late blight resistance protein homolog R1A-10 OS=Solanum demissum OX=50514 GN=R1A-10 PE=3 SV=1;	PF00931.24;PF13173.8;PF13855.8	NB-ARC;AAA_14;LRR_8	NB-ARC domain;AAA domain;Leucine rich repeat
gene_Solyc11g071550.2	Solyc11g071550.2	Amidase family protein (AHRD V3.3 *** A0A2U1LR37_ARTAN)	18.14	19.9	17.83	33.32	65.35	28.74	18.6233	42.47	------	------	K01426	E3.5.1.4, amiE	map00360;map00330;map00380	Phenylalanine metabolism;Arginine and proline metabolism;Tryptophan metabolism	COG0154	J:Translation, ribosomal structure and biogenesis	XP_004251204.1	probable amidase At4g34880 [Solanum lycopersicum]	sp|A0A1P8B760|AMI4G_ARATH;	Probable amidase At4g34880 OS=Arabidopsis thaliana OX=3702 GN=At4g34880 PE=2 SV=1;	PF01425.23	Amidase	Amidase
gene_Solyc11g071990.2	Solyc11g071990.2	FAD/NAD(P)-binding oxidoreductase family protein (AHRD V3.3 *** A0A2U1M1X0_ARTAN)	0.29	0.52	0.28	5.96	4.71	5.24	0.363333	5.30333	GO:0055114;GO:0005737;GO:0004174;GO:0050660;GO:001649	BP:oxidation-reduction process;CC:cytoplasm;MF:electron-transferring-flavoprotein dehydrogenase activity;MF:flavin adenine dinucleotide binding;MF:oxidoreductase activity;	K22745	AIFM2	------	------	COG0446;COG1252	S:Function unknown;C:Energy production and conversion	XP_004251229.1	apoptosis-inducing factor homolog B [Solanum lycopersicum]	sp|Q54NS8|AIFB_DICDI;	Apoptosis-inducing factor homolog B OS=Dictyostelium discoideum OX=44689 GN=aifB PE=3 SV=1;	PF07992.16;PF00070.29;PF13738.8;PF13434.8;PF13241.8	Pyr_redox_2;Pyr_redox;Pyr_redox_3;K_oxygenase;NAD_binding_7	Pyridine nucleotide-disulphide oxidoreductase;Pyridine nucleotide-disulphide oxidoreductase;Pyridine nucleotide-disulphide oxidoreductase;L-lysine 6-monooxygenase;Putative NA
gene_Solyc11g072140.3	Solyc11g072140.3	Protein kinase domain (AHRD V3.3 *** A0A200PR58_9MAGN)	0.08	0.1	0.04	1.29	1	0.81	0.073333	1.03333	GO:0006468;GO:0016021;GO:0030247;GO:0004674;GO:0005509;GO:0004672;GO:000552	BP:protein phosphorylation;CC:integral component of membrane;MF:polysaccharide binding;MF:protein serine/threonine kinase activity;MF:calcium ion binding;MF:protein kinase activity;MF:ATP binding;	------	------	------	------	COG0515	T:Signal transduction mechanisms	XP_004251441.2	wall-associated receptor kinase 3-like [Solanum lycopersicum]	sp|Q39191|WAK1_ARATH;	Wall-associated receptor kinase 1 OS=Arabidopsis thaliana OX=3702 GN=WAK1 PE=1 SV=2;	PF00069.27;PF07714.19;PF13947.8;PF07645.17;PF12662.9;PF08488.13	Pkinase;PK_Tyr_Ser-Thr;GUB_WAK_bind;EGF_CA;cEGF;WAK	Protein kinase domain;Protein tyrosine and serine/threonine kinase;Wall-associated receptor kinase galacturonan-binding;Calcium-binding EGF domain;Complement Clr-like EGF-like;Wall-associated kinase
gene_Solyc11g072600.3	Solyc11g072600.3	APETALA2d	55.87	59.95	52.34	96.81	127.5	82.71	56.0533	102.34	GO:0006952;GO:0006355;GO:0009873;GO:0005634;GO:0003700;GO:000367	BP:defense response;BP:regulation of transcription, DNA-templated;BP:ethylene-activated signaling pathway;CC:nucleus;MF:transcription factor activity, sequence-specific DNA binding;MF:DNA binding;	K09284	AP2	------	------	ENOG410YD13	K:Transcription	XP_010313188.1	AP2 transcription factor SlAP2d isoform X1 [Solanum lycopersicum]	sp|Q9SK03|RAP27_ARATH;	Ethylene-responsive transcription factor RAP2-7 OS=Arabidopsis thaliana OX=3702 GN=RAP2-7 PE=2 SV=2;	PF00847.22	AP2	AP2 domain
gene_Solyc11g073160.3	Solyc11g073160.3	Riboflavin biosynthesis protein ribBA (AHRD V3.3 *** A0A2K3NL55_TRIPR)	5.71	9.04	7.81	18.93	15.2	19.12	7.52	17.75	GO:0009231;GO:0009507;GO:0008686;GO:0003935;GO:0005525;GO:004687	BP:riboflavin biosynthetic process;CC:chloroplast;MF:3,4-dihydroxy-2-butanone-4-phosphate synthase activity;MF:GTP cyclohydrolase II activity;MF:GTP binding;MF:metal ion binding;	K14652	ribBA	map00740;map00790;map01240	Riboflavin metabolism;Folate biosynthesis;Biosynthesis of cofactors	COG0807	H:Coenzyme transport and metabolism	XP_004251310.1	monofunctional riboflavin biosynthesis protein RIBA 3, chloroplastic isoform X1 [Solanum lycopersicum]	sp|Q9FN89|RIBA3_ARATH;	Monofunctional riboflavin biosynthesis protein RIBA 3, chloroplastic OS=Arabidopsis thaliana OX=3702 GN=RIBA3 PE=1 SV=1;	PF00925.22;PF00926.21	GTP_cyclohydro2;DHBP_synthase	GTP cyclohydrolase II;3,4-dihydroxy-2-butanone 4-phosphate synthase
gene_Solyc12g005450.1	Solyc12g005450.1	Protein kinase domain (AHRD V3.3 *** A0A200QFW1_9MAGN)	2.75	1.99	0.8	5.98	11.89	1.34	1.84667	6.40333	GO:0006468;GO:0005886;GO:0016021;GO:0005524;GO:000467	BP:protein phosphorylation;CC:plasma membrane;CC:integral component of membrane;MF:ATP binding;MF:protein kinase activity;	------	------	------	------	COG0515	T:Signal transduction mechanisms	XP_004251495.1	probable receptor-like protein kinase At4g10390 [Solanum lycopersicum]	sp|Q9SV83|Y4103_ARATH;	Probable receptor-like protein kinase At4g10390 OS=Arabidopsis thaliana OX=3702 GN=At4g10390 PE=2 SV=1;	PF00069.27;PF07714.19	Pkinase;PK_Tyr_Ser-Thr	Protein kinase domain;Protein tyrosine and serine/threonine kinase
gene_Solyc12g008650.2	Solyc12g008650.2	Inositol oxygenase (AHRD V3.3 *** A0A200QVH1_9MAGN)	17.06	32.83	14.91	83.62	109.96	42.42	21.6	78.6667	GO:0019853;GO:0019310;GO:0055114;GO:0005737;GO:0050113;GO:000550	BP:L-ascorbic acid biosynthetic process;BP:inositol catabolic process;BP:oxidation-reduction process;CC:cytoplasm;MF:inositol oxygenase activity;MF:iron ion binding;	K00469	MIOX	map01250;map00053;map00562	Biosynthesis of nucleotide sugars;Ascorbate and aldarate metabolism;Inositol phosphate metabolism	ENOG410XQ4J	S:Function unknown	NP_001234593.1	myo-inositol oxygenase [Solanum lycopersicum]	sp|Q8H1S0|MIOX4_ARATH;	Inositol oxygenase 4 OS=Arabidopsis thaliana OX=3702 GN=MIOX4 PE=2 SV=1;	PF05153.17	MIOX	Myo-inositol oxygenase
gene_Solyc12g008980.3	Solyc12g008980.3	Delta,Pfam:PF05834	54.63	77.32	75.7	114.7	130.06	138.55	69.2167	127.77	GO:0016123;GO:0016120;GO:0016117;GO:0006744;GO:0031969;GO:0016021;GO:0016853;GO:0016705;GO:001649	BP:xanthophyll biosynthetic process;BP:carotene biosynthetic process;BP:carotenoid biosynthetic process;BP:ubiquinone biosynthetic process;CC:chloroplast membrane;CC:integral component of membrane;MF:isomerase activity;MF:oxidoreductase activity, acting on paired donors, with incorporation or reduction of molecular oxygen;MF:oxidoreductase activity;	K06444	lcyE, crtL2	map00906	Carotenoid biosynthesis	ENOG410XPIY	I:Lipid transport and metabolism	NP_001234337.2	lycopene epsilon cyclase, chloroplastic [Solanum lycopersicum]	sp|O65837|LCYE_SOLLC;	Lycopene epsilon cyclase, chloroplastic OS=Solanum lycopersicum OX=4081 GN=CRTL-E-1 PE=2 SV=1;	PF05834.14;PF07992.16	Lycopene_cycl;Pyr_redox_2	Lycopene cyclase protein;Pyridine nucleotide-disulphide oxidoreductase
gene_Solyc12g009450.3	Solyc12g009450.3	NBS-LRR protein (AHRD V3.3 *** Q9SM52_SOLAC)	1.67	1.17	1.54	2.65	2.75	2.81	1.46	2.73667	GO:0006952;GO:004353	BP:defense response;MF:ADP binding;	------	------	------	------	COG4886	S:Function unknown	XP_019066849.1	putative late blight resistance protein homolog R1B-16 [Solanum lycopersicum]	sp|Q6L400|R1B16_SOLDE;	Putative late blight resistance protein homolog R1B-16 OS=Solanum demissum OX=50514 GN=R1B-16 PE=3 SV=1;	PF00931.24;PF13191.8	NB-ARC;AAA_16	NB-ARC domain;AAA ATPase domain
gene_Solyc12g010900.1	Solyc12g010900.1	F-box protein MAX2 (AHRD V3.3 *** A0A2G2X2R2_CAPBA)	7	8.21	6.99	13.21	14	15.36	7.4	14.19	GO:0031146;GO:0005634;GO:001900	BP:SCF-dependent proteasomal ubiquitin-dependent protein catabolic process;CC:nucleus;CC:SCF ubiquitin ligase complex;	------	------	------	------	ENOG4110R60	S:Function unknown	XP_004251806.1	F-box/LRR-repeat MAX2 homolog A-like [Solanum lycopersicum]	sp|I1SSI5|MAX2A_PETHY;	F-box/LRR-repeat MAX2 homolog A OS=Petunia hybrida OX=4102 GN=MAX2A PE=1 SV=1;	PF18511.3	F-box_5	F-box
gene_Solyc12g013710.2	Solyc12g013710.2	light dependent NADH:protochlorophyllide oxidoreductase 1	61.62	125.71	200.58	270.56	327.72	317.29	129.303	305.19	GO:0015995;GO:0015979;GO:0009507;GO:001663	BP:chlorophyll biosynthetic process;BP:photosynthesis;CC:chloroplast;MF:protochlorophyllide reductase activity;	K00218	por	map00860	Porphyrin metabolism	COG1028	S:Function unknown	XP_004251852.1	protochlorophyllide reductase [Solanum lycopersicum]	sp|Q9SDT1|POR_DAUCA;	Protochlorophyllide reductase, chloroplastic OS=Daucus carota OX=4039 GN=POR1 PE=2 SV=1;	PF00106.27;PF13561.8;PF08659.12	adh_short;adh_short_C2;KR	short chain dehydrogenase;Enoyl;KR domain
gene_Solyc12g019550.2	Solyc12g019550.2	hypothetical protein (AHRD V3.3 *-* AT1G21500.1)	154.57	300.7	340.59	522.1	785.13	629.1	265.287	645.443	------	------	------	------	------	------	ENOG410ZFSV	S:Function unknown	XP_004252001.1	uncharacterized protein LOC101243677 [Solanum lycopersicum]	------	------	------	------	------
gene_Solyc12g042470.2	Solyc12g042470.2	Non-functional NADPH-dependent codeinone reductase 2 (AHRD V3.3 *** A0A2G2YQM6_CAPAN)	21.79	33.04	21.41	71.52	38.95	67.7	25.4133	59.39	GO:0005829;GO:0004032;GO:004783	CC:cytosol;MF:aldito;MF:D-threo-aldose 1-dehydrogenase activity;	K22374	DMAS1	map00999	Biosynthesis of various plant secondary metabolites	COG0656	S:Function unknown	XP_004252294.1	methylecgonone reductase-like [Solanum lycopersicum]	sp|E7C196|MER_ERYCB;	Methylecgonone reductase OS=Erythroxylum coca OX=289672 PE=1 SV=1;	PF00248.23	Aldo_ket_red	Aldo/keto reductase family
gene_Solyc12g049030.1	Solyc12g049030.1	Fatty acid desaturase (AHRD V3.3 *** A0A200QRI1_9MAGN)	2.81	1.52	0.7	7.32	4.48	6.45	1.67667	6.08333	GO:0006629;GO:0016021;GO:001671	BP:lipid metabolic process;CC:integral component of membrane;MF:oxidoreductase activity, acting on paired donors, with oxidation of a pair of donors resulting in the reduction of molecular oxygen to two molecules of water;	------	------	------	------	COG3239	I:Lipid transport and metabolism	XP_004252384.1	delta(12)-fatty-acid desaturase FAD2-like [Solanum lycopersicum]	sp|Q8GZC3|FAD2_VERFO;	Delt;	PF00487.26;PF11960.10	FA_desaturase;DUF3474	Fatty acid desaturase;Domain of unknown function
gene_Solyc12g056930.2	Solyc12g056930.2	sulfate transporter 2	43.12	41.5	42.51	81.66	68.22	74.2	42.3767	74.6933	GO:0008272;GO:0016021;GO:0005887;GO:0015301;GO:0015116;GO:000827	BP:sulfate transport;CC:integral component of membrane;CC:integral component of plasma membrane;MF:anio;MF:sulfate transmembrane transporter activity;MF:secondary active sulfate transmembrane transporter activity;	K17470	SULTR1	------	------	COG0659	P:Inorganic ion transport and metabolism	NP_001234569.2	sulfate transporter 2 [Solanum lycopersicum]	sp|Q9MAX3|SUT12_ARATH;	Sulfate transporter 1.2 OS=Arabidopsis thaliana OX=3702 GN=SULTR1;2 PE=1 SV=1;	PF00916.22;PF01740.23	Sulfate_transp;STAS	Sulfate permease family;STAS domain
gene_Solyc12g094640.4	Solyc12g094640.4	Glyceraldehyde-3-phosphate dehydrogenase (AHRD V3.11 *** tr|A0A2G2YA75|A0A2G2YA75_CAPAN)	175.11	258.53	226.35	451.7	324.72	518.54	219.997	431.653	GO:0006006;GO:0009507;GO:0004365;GO:0051287;GO:0050661;GO:001662	BP:glucose metabolic process;CC:chloroplast;MF:glyceraldehyde-3-phosphate dehydrogenas;MF:NAD binding;MF:NADP binding;MF:oxidoreductase activity, acting on the aldehyde or oxo group of donors, NAD or NADP as acceptor;	K05298	GAPA	map00710	Carbon fixation in photosynthetic organisms	COG0057	G:Carbohydrate transport and metabolism	XP_004253122.1	glyceraldehyde-3-phosphate dehydrogenase B, chloroplastic-like [Solanum lycopersicum]	sp|P12859|G3PB_PEA;	Glyceraldehyde-3-phosphate dehydrogenase B, chloroplastic OS=Pisum sativum OX=3888 GN=GAPB PE=1 SV=2;	PF02800.22;PF00044.26;PF02672.17	Gp_dh_C;Gp_dh_N;CP12	Glyceraldehyde 3-phosphate dehydrogenase, C-terminal domain;Glyceraldehyde 3-phosphate dehydrogenase, NAD binding domain;CP12 domain
gene_Solyc12g096900.2	Solyc12g096900.2	Disease resistance protein (TIR-NBS-LRR class) family (AHRD V3.3 *-* A0A2U1LJH5_ARTAN)	48.05	56.11	45.49	92.62	81.53	98.61	49.8833	90.92	GO:0007165;GO:000551	BP:signal transduction;MF:protein binding;	------	------	------	------	ENOG4112BMQ;ENOG4111THG;ENOG410YD6D;ENOG4111C7T	S:Function unknown;O:Posttranslational modification, protein turnover, chaperones	XP_004253023.1	protein PHLOEM PROTEIN 2-LIKE A8 [Solanum lycopersicum]	sp|Q40392|TMVRN_NICGU;	TMV resistance protein N OS=Nicotiana glutinosa OX=35889 GN=N PE=1 SV=1;	PF14299.8;PF01582.22;PF13676.8	PP2;TIR;TIR_2	Phloem protein 2;TIR domain;TIR domain
gene_Solyc12g099970.2	Solyc12g099970.2	SN.1	55.39	73.02	78.15	134.43	205.4	152.08	68.8533	163.97	GO:0043562;GO:0031588;GO:0009507;GO:0019887;GO:0016301;GO:1901982;GO:000551	BP:cellular response to nitrogen levels;CC:nucleotide-activated protein kinase complex;CC:chloroplast;MF:protein kinase regulator activity;MF:kinase activity;MF:maltose binding;MF:protein binding;	K07199	PRKAB	------	------	ENOG410XRB3	S:Function unknown	NP_001266255.2	SNF1 kinase complex anchoring protein [Solanum lycopersicum]	sp|Q84VQ1|KINB1_ARATH;	SNF1-related protein kinase regulatory subunit beta-1 OS=Arabidopsis thaliana OX=3702 GN=KINB1 PE=1 SV=1;	PF16561.7;PF04739.17	AMPK1_CBM;AMPKBI	Glycogen recognition site of AMP-activated protein kinase;5'-AMP-activated protein kinase beta subunit, interaction domain

## Sheet: Cd_vs_Control_cluster2
Supplementary Dataset 1b. Gene co-expression clusters of DEGs in Cd vs. Control group of tomato seedlings.
Gene_id	Gene_name	Gene_description	Control_1	Control_2	Control_3	Cd_1	Cd_2	Cd_3	Control	Cd	GO_id	GO_term	KO_id	KO_name	Pathway_id	Pathway_definition	COG_id	COG_Functional Categories	NR_hit-name	NR_description	Swiss-Prot_hit-name	Swiss-Prot_description	Pfam_id	Domain	Domain description
gene_Solyc00g500024.1	Solyc00g500024.1	Photosystem II CP47 reaction center protein (AHRD V3.3 *** A0A1U8QCF6_CAPAN)	8.17	3.41	2.07	0.37	1.38	0.72	4.55	0.823333	GO:0018298;GO:0019684;GO:0009767;GO:0009772;GO:0009535;GO:0009536;GO:0009523;GO:0009521;GO:0016021;GO:0016020;GO:0042651;GO:0009507;GO:0016168;GO:004515	BP:protein-chromophore linkage;BP:photosynthesis, light reaction;BP:photosynthetic electron transport chain;BP:photosynthetic electron transport in photosystem II;CC:chloroplast thylakoid membrane;CC:plastid;CC:photosystem II;CC:photosystem;CC:integral component of membrane;CC:membrane;CC:thylakoid membrane;CC:chloroplast;MF:chlorophyll binding;MF:electron transporter, transferring electrons with…	K02704	psbB	map00195	Photosynthesis	ENOG410XQ0W	S:Function unknown	NP_054526.1	photosystem II 47 kDa protein [Nicotiana tabacum]	sp|Q7FNS4|PSBB_ATRBE;	Photosystem II CP47 reaction center protein OS=Atropa belladonna OX=33113 GN=psbB PE=3 SV=1;	PF00421.21	PSII	Photosystem II protein
gene_Solyc00g500071.1	Solyc00g500071.1	Photosystem II CP43 reaction center protein (AHRD V3.3 *** A0A078EKT7_BRANA)	8.17	3.41	2.07	0.37	1.38	0.72	4.55	0.823333	GO:0018298;GO:0019684;GO:0009767;GO:0009772;GO:0009535;GO:0009536;GO:0009523;GO:0009521;GO:0016021;GO:0016020;GO:0042651;GO:0009507;GO:0016168;GO:004515	BP:protein-chromophore linkage;BP:photosynthesis, light reaction;BP:photosynthetic electron transport chain;BP:photosynthetic electron transport in photosystem II;CC:chloroplast thylakoid membrane;CC:plastid;CC:photosystem II;CC:photosystem;CC:integral component of membrane;CC:membrane;CC:thylakoid membrane;CC:chloroplast;MF:chlorophyll binding;MF:electron transporter, transferring electrons with…	K02704	psbB	map00195	Photosynthesis	ENOG410XQ0W	S:Function unknown	NP_054526.1	photosystem II 47 kDa protein [Nicotiana tabacum]	sp|Q7FNS4|PSBB_ATRBE;	Photosystem II CP47 reaction center protein OS=Atropa belladonna OX=33113 GN=psbB PE=3 SV=1;	PF00421.21	PSII	Photosystem II protein
gene_Solyc00g500293.1	Solyc00g500293.1	Photosystem II reaction center protein K (AHRD V3.3 *** A0A1U8QD48_CAPAN)	2.45	2.41	2.08	0	0.57	0	2.31333	0.19	GO:0015979;GO:0016021;GO:000953	BP:photosynthesis;CC:integral component of membrane;CC:photosystem II reaction center;	K02712	psbK	map00195	Photosynthesis	ENOG410ZYV7	S:Function unknown	TYH02290.1	hypothetical protein ES288_A09G128500v1 [Gossypium darwinii]	sp|Q8S8Y4|PSBK_ATRBE;	Photosystem II reaction center protein K OS=Atropa belladonna OX=33113 GN=psbK PE=3 SV=1;	PF02532.16;PF02533.17	PsbI;PsbK	Photosystem II reaction centre I protein;Photosystem II 4 kDa reaction centre component
gene_Solyc00g500328.1	Solyc00g500328.1	Ribosomal protein L2, plastid (AHRD V3.3 *-* A0A2U1PJW3_ARTAN)	11.22	9.68	7.29	3.31	4.42	1.44	9.39667	3.05667	GO:0006351;GO:0009507;GO:0003899;GO:000367	BP:transcription, DNA-templated;CC:chloroplast;MF:DNA-directed RNA polymerase activity;MF:DNA binding;	K02886	RP-L2, MRPL2, rplB	map03010	Ribosome	COG0090;ENOG410YXWC	J:Translation, ribosomal structure and biogenesis;S:Function unknown	KAG7012670.1	putative protein ycf72, partial [Cucurbita argyrosperma subsp. argyrosperma]	sp|Q6ENC9|YCF72_ORYNI;	Uncharacterized protein ycf72 OS=Oryza nivara OX=4536 GN=ycf72-1 PE=3 SV=1;	------	------	------
gene_Solyc01g005590.2	Solyc01g005590.2	Unknown protein	70.1	58.18	56.46	26.8	33.21	33.52	61.58	31.1767	GO:0016021;GO:003122	CC:integral component of membrane;CC:anchored component of membrane;	------	------	------	------	ENOG4111CA2;ENOG4111899	S:Function unknown;	XP_010316319.1	arabinogalactan protein 13 [Solanum lycopersicum]	------	------	------	------	------
gene_Solyc01g009260.1	Solyc01g009260.1	protein FAF-like, chloroplastic (AHRD V3.3 *** A0A2I4H6U5_9ROSI)	1.31	1.02	0.92	0.38	0.21	0.28	1.08333	0.29	------	------	------	------	------	------	ENOG410YQ65	S:Function unknown	XP_004228872.3	protein FAF-like, chloroplastic [Solanum lycopersicum]	sp|Q0V865|FAFL_ARATH;	Protein FAF-like, chloroplastic OS=Arabidopsis thaliana OX=3702 GN=At5g22090 PE=2 SV=1;	PF11250.10	FAF	Fantastic Four meristem regulator
gene_Solyc01g010970.3	Solyc01g010970.3	Argonaute7	0.92	0.76	0.88	0.26	0.36	0.17	0.853333	0.263333	GO:0016246;GO:0010492;GO:0031047;GO:000367	BP:RNA interference;BP:maintenance of shoot apical meristem identity;BP:gene silencing by RNA;MF:nucleic acid binding;	K11593	ELF2C, AGO	------	------	ENOG410XP07	J:Translation, ribosomal structure and biogenesis	NP_001266209.1	argonaute 7 [Solanum lycopersicum]	sp|Q9C793|AGO7_ARATH;	Protein argonaute 7 OS=Arabidopsis thaliana OX=3702 GN=AGO7 PE=2 SV=1;	PF02171.19;PF16486.7;PF02170.24;PF08699.12;PF16488.7	Piwi;ArgoN;PAZ;ArgoL1;ArgoL2	Piwi domain;N-terminal domain of argonaute;PAZ domain;Argonaute linker 1 domain;Argonaute linker 2 domain
gene_Solyc01g049690.5	Solyc01g049690.5	Transcription factor Pur-alpha 1 (AHRD V3.11 *-* tr|A0A1U8F1B9|A0A1U8F1B9_CAPAN)	27.23	23.23	28.68	6.46	18.92	11.69	26.38	12.3567	GO:0005634;GO:0032422;GO:000097	CC:nucleus;MF:purine-rich negative regulatory element binding;MF:RNA polymerase II regulatory region sequence-specific DNA binding;	K21772	PURA	------	------	ENOG410ZKKR	K:Transcription	XP_006341878.1	PREDICTED: transcription factor Pur-alpha 1 isoform X2 [Solanum tuberosum]	sp|Q9SKZ1|PUR_ARATH;	Transcription factor Pur-alpha 1 OS=Arabidopsis thaliana OX=3702 GN=PURA1 PE=1 SV=2;	PF04845.15;PF11680.10	PurA;DUF3276	PurA ssDNA and RNA-binding protein;Protein of unknown function
gene_Solyc01g057270.4	Solyc01g057270.4	Calmodulin-binding transcription factor SR4 (AHRD V3.3 *** H8ZRY5_SOLLC)	1.6	1.94	1.79	0.89	0.73	0.93	1.77667	0.85	GO:0006357;GO:0005634;GO:0003712;GO:0005516;GO:0003677;GO:000369	BP:regulation of transcription from RNA polymerase II promoter;CC:nucleus;MF:transcription cofactor activity;MF:calmodulin binding;MF:DNA binding;MF:double-stranded DNA binding;	K21596	CAMTA	------	------	ENOG410XS5M;ENOG410YET3	K:Transcription;	XP_010318684.1	calmodulin-binding transcription factor SR4 isoform X1 [Solanum lycopersicum]	sp|Q8GSA7|CMTA3_ARATH;	Calmodulin-binding transcription activator 3 OS=Arabidopsis thaliana OX=3702 GN=CAMTA3 PE=1 SV=1;	PF03859.18;PF12796.9;PF13857.8;PF13637.8;PF13606.8	CG-1;Ank_2;Ank_5;Ank_4;Ank_3	CG-1 domain;Ankyrin repeats;Ankyrin repeats;Ankyrin repeats;Ankyrin repeat
gene_Solyc01g079620.5	Solyc01g079620.5	Myb 12 transcription factor (AHRD V3.11 *** tr|D2EBC3|D2EBC3_9SOLN)	9.11	7.83	9	3.74	3.49	3.04	8.64667	3.42333	GO:000563	CC:nucleus;	K09422	MYBP	------	------	COG5147	K:Transcription	NP_001234401.1	Myb12 transcription factor [Solanum lycopersicum]	sp|O22264|MYB12_ARATH;	Transcription factor MYB12 OS=Arabidopsis thaliana OX=3702 GN=MYB12 PE=1 SV=1;	PF00249.33;PF13921.8	Myb_DNA-binding;Myb_DNA-bind_6	Myb-like DNA-binding domain;Myb-like DNA-binding domain
gene_Solyc01g081586.1	Solyc01g081586.1	Callose synthase-like protein (AHRD V3.3 *-* Q7XJC6_ORYSJ)	23.78	19.76	22.74	6.12	14.25	8.69	22.0933	9.68667	GO:0006075;GO:0071555;GO:0008360;GO:0016021;GO:0000148;GO:0005886;GO:0003843;GO:004652	BP:;BP:cell wall organization;BP:regulation of cell shape;CC:integral component of membrane;CC:1,3-beta-D-glucan synthase complex;CC:plasma membrane;MF:1,3-beta-D-glucan synthase activity;MF:glucosyltransferase activity;	K11000	CALS	------	------	ENOG410XQ8V	S:Function unknown	XP_025887034.1	LOW QUALITY PROTEIN: callose synthase 2 [Solanum lycopersicum]	sp|Q9LXT9|CALS3_ARATH;	Callose synthase 3 OS=Arabidopsis thaliana OX=3702 GN=CALS3 PE=3 SV=3;	------	------	------
gene_Solyc01g090800.3	Solyc01g090800.3	cyclinU2_1	11.83	10	7.94	5.23	3.45	0.99	9.92333	3.22333	GO:0000079;GO:001990	BP:regulation of cyclin-dependent protein serine/threonine kinase activity;MF:protein kinase binding;	------	------	------	------	ENOG4111TTK	S:Function unknown	XP_004229782.1	cyclin-U2-1 [Solanum lycopersicum]	sp|Q9M205|CCU22_ARATH;	Cyclin-U2-2 OS=Arabidopsis thaliana OX=3702 GN=CYCU2-2 PE=1 SV=1;	PF08613.13;PF00134.25	Cyclin;Cyclin_N	Cyclin;Cyclin, N-terminal domain
gene_Solyc01g095140.5	Solyc01g095140.5	Desiccation protectant protein Lea14-like protein (AHRD V3.11 *** tr|A0A2G3BT76|A0A2G3BT76_CAPCH)	42.46	33.33	33.5	23.55	13.71	13.12	36.43	16.7933	GO:0009269;GO:000582	BP:response to desiccation;CC:cytosol;	------	------	------	------	ENOG4111PUK	S:Function unknown	NP_001233938.1	ethylene-responsive late embryogenesis-like protein [Solanum lycopersicum]	sp|P46519|LEA14_SOYBN;	Desiccation protectant protein Lea14 homolog OS=Glycine max OX=3847 PE=2 SV=1;	PF03168.15	LEA_2	Late embryogenesis abundant protein
gene_Solyc01g096940.5	Solyc01g096940.5	Protein kinase (AHRD V3.11 *** tr|Q2HVC0|Q2HVC0_MEDTR)	9.52	9.4	15.73	5.61	4.5	3.92	11.55	4.67667	GO:0046777;GO:0016021;GO:0005886;GO:0009506;GO:0004672;GO:000552	BP:protein autophosphorylation;CC:integral component of membrane;CC:plasma membrane;CC:plasmodesma;MF:protein kinase activity;MF:ATP binding;	------	------	------	------	ENOG410XPGM	T:Signal transduction mechanisms	XP_004230068.1	probable inactive leucine-rich repeat receptor-like protein kinase At3g03770 [Solanum lycopersicum]	sp|Q8LFN2|Y3037_ARATH;	Probable inactive leucine-rich repeat receptor-like protein kinase At3g03770 OS=Arabidopsis thaliana OX=3702 GN=At3g03770 PE=1 SV=1;	PF07714.19;PF00069.27;PF13855.8;PF12799.9	PK_Tyr_Ser-Thr;Pkinase;LRR_8;LRR_4	Protein tyrosine and serine/threonine kinase;Protein kinase domain;Leucine rich repeat;Leucine Rich repeats
gene_Solyc01g098720.3	Solyc01g098720.3	Basic helix-loop-helix (BHLH) DNA-binding superfamily protein (AHRD V3.3 *** A0A2U1PAJ2_ARTAN)	3.14	3.29	3.06	0.9	1.77	0.92	3.16333	1.19667	GO:0006357;GO:0005634;GO:0046983;GO:0000978;GO:000098	BP:regulation of transcription from RNA polymerase II promoter;CC:nucleus;MF:protein dimerization activity;MF:RNA polymerase II core promoter proximal region sequence-specific DNA binding;MF:RNA polymerase II transcription factor activity, sequence-specific DNA binding;	------	------	------	------	ENOG410YF8H	K:Transcription	XP_004230172.1	transcription factor bHLH96-like [Solanum lycopersicum]	sp|Q9C7T4|BH096_ARATH;	Transcription factor bHLH96 OS=Arabidopsis thaliana OX=3702 GN=BHLH96 PE=1 SV=1;	PF00010.28	HLH	Helix-loop-helix DNA-binding domain
gene_Solyc01g099010.3	Solyc01g099010.3	GDSL esterase/lipase At5g03980-like (AHRD V3.3 *** A0A1U8DUA9_CAPAN)	4.88	4.89	6.93	3.74	1.97	1.87	5.56667	2.52667	GO:001678	MF:hydrolase activity, acting on ester bonds;	------	------	------	------	ENOG410YA52	S:Function unknown	XP_004230192.1	acetylajmalan esterase isoform X1 [Solanum lycopersicum]	sp|Q3MKY2|AAE_RAUSE;	Acetylajmalan esterase OS=Rauvolfia serpentina OX=4060 GN=AAE PE=1 SV=1;	PF00657.24	Lipase_GDSL	GDSL-like Lipase/Acylhydrolase
gene_Solyc01g100890.4	Solyc01g100890.4	WAT1-related protein (AHRD V3.3 *** K4B1C0_SOLLC)	2.22	1.95	1.54	0.72	0.87	0.28	1.90333	0.623333	GO:0016020;GO:0016021;GO:0005886;GO:002285	CC:membrane;CC:integral component of membrane;CC:plasma membrane;MF:transmembrane transporter activity;	------	------	------	------	ENOG410YU38;ENOG410YFIU	S:Function unknown;	NP_001306254.1	WAT1-related protein At1g09380-like precursor [Solanum lycopersicum]	sp|Q8GXB4|WTR2_ARATH;	WAT1-related protein At1g09380 OS=Arabidopsis thaliana OX=3702 GN=At1g09380 PE=2 SV=1;	PF00892.22	EamA	EamA-like transporter family
gene_Solyc01g103873.1	Solyc01g103873.1	Basic-leucine zipper (BZIP) transcription factor family protein (AHRD V3.3 *** F4I9R1_ARATH)	19.13	17.29	17.21	8.48	5.67	5.13	17.8767	6.42667	GO:000370	MF:transcription factor activity, sequence-specific DNA binding;	------	------	------	------	ENOG410YFJG	K:Transcription	XP_025883492.1	uncharacterized protein At4g06598 isoform X1 [Solanum lycopersicum]	sp|Q8W3M7|Y4598_ARATH;	Uncharacterized protein At4g06598 OS=Arabidopsis thaliana OX=3702 GN=At4g06598 PE=2 SV=2;	PF00170.23	bZIP_1	bZIP transcription factor
gene_Solyc01g109680.3	Solyc01g109680.3	hypothetical protein (AHRD V3.3 *** AT4G39235.2)	18.55	20.1	15.11	10.05	8.4	6.27	17.92	8.24	------	------	------	------	------	------	ENOG410YS3T	S:Function unknown	XP_004230977.1	uncharacterized protein LOC101246482 [Solanum lycopersicum]	------	------	------	------	------
gene_Solyc01g150153.2	Solyc01g150153.2	SWIB domain-containing protein/GYF domain-containing protein/Plus-3 domain-containing protein (AHRD V3.11 *-* tr|A0A1Q3C9X0|A0A1Q3C9X0_CEPFO)	1.49	1.65	1.56	0.78	0.44	0.43	1.56667	0.55	GO:0004523;GO:000367	MF:RNA-DNA hybrid ribonuclease activity;MF:DNA binding;	------	------	------	------	COG5531	B:Chromatin structure and dynamics	XP_025888947.1	uncharacterized protein LOC101262962 isoform X3 [Solanum lycopersicum]	sp|Q9FT92|Y5843_ARATH;	Uncharacterized protein At5g08430 OS=Arabidopsis thaliana OX=3702 GN=At5g08430 PE=1 SV=2;	PF03126.20	Plus-3	Plus-3 domain
gene_Solyc02g062240.3	Solyc02g062240.3	Small nuclear ribonucleoprotein Sm D3 (AHRD V3.3 *** A0A1U8FJ77_CAPAN)	62.75	57.74	73.03	30.82	30.86	31.44	64.5067	31.04	GO:0000387;GO:0000243;GO:0071011;GO:0071013;GO:0005682;GO:0034715;GO:0097526;GO:0005689;GO:0005687;GO:0005686;GO:0005685;GO:0034719;GO:0005829;GO:0005681;GO:000372	BP:spliceosomal snRNP assembly;CC:commitment complex;CC:precatalytic spliceosome;CC:catalytic step 2 spliceosome;CC:U5 snRNP;CC:pICln-Sm protein complex;CC:spliceosomal tri-snRNP complex;CC:U12-type spliceosomal complex;CC:U4 snRNP;CC:U2 snRNP;CC:U1 snRNP;CC:SMN-Sm protein complex;CC:cytosol;CC:spliceosomal complex;MF:RNA binding;	K11088	SNRPD3, SMD3	map03040	Spliceosome	COG1958	K:Transcription	XP_004233553.1	small nuclear ribonucleoprotein SmD3b [Solanum lycopersicum]	sp|Q9LM92|SMD3B_ARATH;	Small nuclear ribonucleoprotein SmD3b OS=Arabidopsis thaliana OX=3702 GN=SMD3B PE=2 SV=1;	PF01423.24	LSM	LSM domain
gene_Solyc02g063380.1	Solyc02g063380.1	Unknown protein	11.2	17.61	25.37	3.49	13.12	2.02	18.06	6.21	------	------	------	------	------	------	ENOG4111C1X	S:Function unknown	XP_004233473.1	uncharacterized protein LOC101251647 [Solanum lycopersicum]	------	------	------	------	------
gene_Solyc02g066810.2	Solyc02g066810.2	alpha 1%2C4-glycosyltransferase family protein Chr4:10789932-10791433 REVERSE LENGTH=473 201606 (AHRD V3.11 --* AT4G19900.2)	1.53	2.03	1.75	0.2	0.14	0.21	1.77	0.183333	GO:001602	CC:integral component of membrane;	------	------	------	------	ENOG4111PD8	S:Function unknown	XP_006367891.1	PREDICTED: uncharacterized protein At4g19900 [Solanum tuberosum]	------	------	------	------	------
gene_Solyc02g076900.5	Solyc02g076900.5	Dual specificity phosphatase (AHRD V3.11 *** tr|A0A200QWG9|A0A200QWG9_9MAGN)	1.93	1.51	1.86	0.81	0.69	0.46	1.76667	0.653333	GO:0006470;GO:000813	BP:protein dephosphorylation;MF:protein tyrosine/serine/threonine phosphatase activity;	K14819	DUSP12, YVH1	------	------	COG2453	T:Signal transduction mechanisms	XP_004233073.1	probable inactive dual specificity protein phosphatase-like At4g18593 [Solanum lycopersicum]	sp|Q570P7|DUSL1_ARATH;	Probable inactive dual specificity protein phosphatase-like At4g18593 OS=Arabidopsis thaliana OX=3702 GN=At4g18593 PE=2 SV=1;	------	------	------
gene_Solyc02g078130.3	Solyc02g078130.3	bHLH transcription factor 079	24.84	15.32	16.92	8.69	11.95	5.28	19.0267	8.64	GO:0050832;GO:0006357;GO:0005634;GO:0090575;GO:0003700;GO:0000977;GO:0046983;GO:000098	BP:defense response to fungus;BP:regulation of transcription from RNA polymerase II promoter;CC:nucleus;CC:RNA polymerase II transcription factor complex;MF:transcription factor activity, sequence-specific DNA binding;MF:RNA polymerase II regulatory region sequence-specific DNA binding;MF:protein dimerization activity;MF:RNA polymerase II transcription factor activity, sequence-specific DNA bindi…	------	------	------	------	ENOG41115Q0	S:Function unknown	XP_004233835.1	transcription factor bHLH162 [Solanum lycopersicum]	sp|F4JIJ7|BH162_ARATH;	Transcription factor bHLH162 OS=Arabidopsis thaliana OX=3702 GN=BHLH162 PE=1 SV=1;	PF00010.28	HLH	Helix-loop-helix DNA-binding domain
gene_Solyc02g079430.4	Solyc02g079430.4	Zinc finger protein CONSTANS-LIKE 13 (AHRD V3.3 *** A0A2G2XF19_CAPBA)	20.25	16.55	17.3	7.35	5.71	7.73	18.0333	6.93	GO:000827	MF:zinc ion binding;	------	------	------	------	ENOG410YSB4;ENOG411176J	S:Function unknown;	XP_004232775.1	zinc finger protein CONSTANS-LIKE 2 [Solanum lycopersicum]	sp|Q9LRM4|MIP1B_ARATH;	B-box domain protein 31 OS=Arabidopsis thaliana OX=3702 GN=MIP1B PE=2 SV=1;	PF00643.26	zf-B_box	B-box zinc finger
gene_Solyc02g080110.3	Solyc02g080110.3	transmembrane protein (AHRD V3.3 *** AT4G21215.2)	11	10.48	9.73	5.58	4.12	3.08	10.4033	4.26	GO:001602	CC:integral component of membrane;	------	------	------	------	ENOG410Z44E	S:Function unknown	XP_010316617.1	uncharacterized protein LOC101263370 isoform X1 [Solanum lycopersicum]	------	------	------	------	------
gene_Solyc02g080550.1	Solyc02g080550.1	Unknown protein	6.44	6.11	8.78	4.65	2.77	2.15	7.11	3.19	GO:001602	CC:integral component of membrane;	------	------	------	------	ENOG4111472	S:Function unknown	TMW93445.1	hypothetical protein EJD97_011676 [Solanum chilense]	------	------	------	------	------
gene_Solyc02g080560.1	Solyc02g080560.1	Unknown protein	5.71	8.73	10.05	3.2	3.75	1.23	8.16333	2.72667	GO:001602	CC:integral component of membrane;	------	------	------	------	ENOG4111472	S:Function unknown	TMW93446.1	hypothetical protein EJD97_011677 [Solanum chilense]	------	------	------	------	------
gene_Solyc02g081360.4	Solyc02g081360.4	AMP-dependent synthetase/ligase (AHRD V3.3 *** A0A200PYF6_9MAGN)	12.12	7.14	6.44	4.93	2.12	2.73	8.56667	3.26	GO:0009698;GO:0016207;GO:000382	BP:phenylpropanoid metabolic process;MF:4-coumarate-CoA ligase activity;MF:catalytic activity;	K23618	AAE11_12	------	------	COG0318;COG0318	I:Lipid transport and metabolism;Q:Secondary metabolites biosynthesis, transport and catabolism	XP_004232665.1	butyrate--CoA ligase AAE11, peroxisomal-like [Solanum lycopersicum]	sp|I3PB36|CNL_PETHY;	Trans-cinnamate:CoA ligase, peroxisomal OS=Petunia hybrida OX=4102 GN=CNL PE=1 SV=1;	PF00501.30	AMP-binding	AMP-binding enzyme
gene_Solyc02g081370.2	Solyc02g081370.2	AMP-dependent synthetase/ligase (AHRD V3.3 *** A0A200PYF6_9MAGN)	1.17	0.82	0.62	0.29	0.14	0.1	0.87	0.176667	GO:0009698;GO:0016207;GO:000382	BP:phenylpropanoid metabolic process;MF:4-coumarate-CoA ligase activity;MF:catalytic activity;	K23618	AAE11_12	------	------	COG0318;COG0318	I:Lipid transport and metabolism;Q:Secondary metabolites biosynthesis, transport and catabolism	XP_004232665.1	butyrate--CoA ligase AAE11, peroxisomal-like [Solanum lycopersicum]	sp|I3PB36|CNL_PETHY;	Trans-cinnamate:CoA ligase, peroxisomal OS=Petunia hybrida OX=4102 GN=CNL PE=1 SV=1;	PF00501.30;PF13193.8	AMP-binding;AMP-binding_C	AMP-binding enzyme;AMP-binding enzyme C-terminal domain
gene_Solyc02g084210.1	Solyc02g084210.1	GDP-mannose 4,6-dehydratase (AHRD V3.3 *** A0A2G3CZP5_CAPCH)	3.14	1.99	1.71	0.45	0.59	0.39	2.28	0.476667	GO:0019673;GO:0042351;GO:0005737;GO:000844	BP:GDP-mannose metabolic process;BP:'de novo' GDP-L-fucose biosynthetic process;CC:cytoplasm;MF:GDP-mannose 4,6-dehydratase activity;	K01711	gmd, GMDS	map00520;map01250;map00051	Amino sugar and nucleotide sugar metabolism;Biosynthesis of nucleotide sugars;Fructose and mannose metabolism	COG1089	M:Cell wall/membrane/envelope biogenesis	XP_004232477.1	GDP-mannose 4,6 dehydratase 1-like [Solanum lycopersicum]	sp|Q9SNY3|GMD1_ARATH;	GDP-mannose 4,6 dehydratase 1 OS=Arabidopsis thaliana OX=3702 GN=GMD1 PE=1 SV=1;	PF16363.7;PF01370.23;PF04321.19	GDP_Man_Dehyd;Epimerase;RmlD_sub_bind	GDP-mannose 4,6 dehydratase;NAD dependent epimerase/dehydratase family;RmlD substrate binding domain
gene_Solyc02g086080.4	Solyc02g086080.4	Alpha/beta-Hydrolases superfamily protein (AHRD V3.3 *-* F4KA67_ARATH)	2.64	4.27	4.8	1.73	1.74	1.72	3.90333	1.73	------	------	------	------	------	------	ENOG4111KDT	S:Function unknown	XP_004232353.1	uncharacterized protein LOC101267470 [Solanum lycopersicum]	------	------	------	------	------
gene_Solyc02g086140.2	Solyc02g086140.2	homeobox Hox-B3-like protein (AHRD V3.3 *** AT1G67035.2)	2.62	1.92	2.12	0.73	0.66	0.77	2.22	0.72	GO:000404	MF:aminoacyl-tRNA hydrolase activity;	------	------	------	------	ENOG4111AY5;ENOG41106C6	S:Function unknown;	XP_010316328.1	uncharacterized protein LOC104645730 [Solanum lycopersicum]	------	------	------	------	------
gene_Solyc02g087060.4	Solyc02g087060.4	WAT1-related protein (AHRD V3.3 *** K4BBL3_SOLLC)	76.62	60.86	69.7	38.56	18.36	35.97	69.06	30.9633	GO:0016020;GO:0016021;GO:0005886;GO:002285	CC:membrane;CC:integral component of membrane;CC:plasma membrane;MF:transmembrane transporter activity;	------	------	------	------	ENOG4111ADX	S:Function unknown	XP_004232282.1	WAT1-related protein At3g28050 [Solanum lycopersicum]	sp|Q94JU2|WTR18_ARATH;	WAT1-related protein At3g28050 OS=Arabidopsis thaliana OX=3702 GN=At3g28050 PE=2 SV=1;	PF00892.22	EamA	EamA-like transporter family
gene_Solyc02g089610.2	Solyc02g089610.2	S-adenosylmethionine decarboxylase 2	39.21	25.16	23.95	10.7	10.76	13.38	29.44	11.6133	GO:0006557;GO:0008295;GO:0006597;GO:0005829;GO:000401	BP:S-adenosylmethioninamine biosynthetic process;BP:spermidine biosynthetic process;BP:spermine biosynthetic process;CC:cytosol;MF:adenosylmethionine decarboxylase activity;	K01611	speD, AMD1	map00270;map00330	Cysteine and methionine metabolism;Arginine and proline metabolism	ENOG410XRN0	E:Amino acid transport and metabolism	NP_001307075.1	S-adenosylmethionine decarboxylase 2 [Solanum lycopersicum]	sp|Q96471|DCAM_IPONI;	S-adenosylmethionine decarboxylase proenzyme OS=Ipomoea nil OX=35883 GN=SAMDC PE=3 SV=1;	PF01536.18	SAM_decarbox	Adenosylmethionine decarboxylase
gene_Solyc02g091690.3	Solyc02g091690.3	bHLH transcription factor 081	7.29	11.16	9.91	3.18	5.85	2.63	9.45333	3.88667	GO:0006355;GO:0005634;GO:0003700;GO:0043565;GO:004698	BP:regulation of transcription, DNA-templated;CC:nucleus;MF:transcription factor activity, sequence-specific DNA binding;MF:sequence-specific DNA binding;MF:protein dimerization activity;	------	------	------	------	ENOG410YB4F	K:Transcription	XP_004231971.1	transcription factor bHLH93-like [Solanum lycopersicum]	sp|Q9LSL1|BH093_ARATH;	Transcription factor bHLH93 OS=Arabidopsis thaliana OX=3702 GN=BHLH93 PE=1 SV=1;	PF00010.28	HLH	Helix-loop-helix DNA-binding domain
gene_Solyc02g092300.1	Solyc02g092300.1	50S ribosomal protein L7/L12 (AHRD V3.3 *** A0A1U8FNY5_CAPAN)	21.61	19.82	19.8	14.08	8.6	9.96	20.41	10.88	GO:0022900;GO:0006412;GO:0005840;GO:0005743;GO:0070469;GO:0003735;GO:001665	BP:electron transport chain;BP:translation;CC:ribosome;CC:mitochondrial inner membrane;CC:respiratory chain;MF:structural constituent of ribosome;MF:oxidoreductase activity, acting on NA;	K02935	RP-L7, MRPL12, rplL	map03010	Ribosome	COG0222	J:Translation, ribosomal structure and biogenesis	XP_004231930.1	uncharacterized protein LOC101263560 [Solanum lycopersicum]	sp|Q9L5W4|RL7_LIBAC;	50S ribosomal protein L7/L12 OS=Liberibacter africanus subsp. capensis OX=119494 GN=rplL PE=3 SV=1;	PF00542.21	Ribosomal_L12	Ribosomal protein L7/L12 C-terminal domain
gene_Solyc03g006710.1	Solyc03g006710.1	Calcium-binding protein PB.1	13.25	13.58	11.64	7.66	8.82	8.82	12.8233	8.43333	GO:000550	MF:calcium ion binding;	K24345	KIC	------	------	COG5126;COG5126;COG5126	D:Cell cycle control, cell division, chromosome partitioning;T:Signal transduction mechanisms;Z:Cytoskeleton	XP_004234139.1	calcium-binding protein KRP1-like [Solanum lycopersicum]	sp|O81831|CARP1_ARATH;	Calcium-binding protein KRP1 OS=Arabidopsis thaliana OX=3702 GN=KRP1 PE=2 SV=1;	PF13833.8;PF00036.34	EF-hand_8;EF-hand_1	EF-hand domain pair;EF hand
gene_Solyc03g034390.1	Solyc03g034390.1	Bifunctional inhibitor/lipid-transfer protein/seed storage 2S albumin superfamily protein (AHRD V3.3 *-* Q94AQ3_ARATH)	96.27	50.3	124.02	29.74	48.75	34.34	90.1967	37.61	GO:000686	BP:lipid transport;	------	------	------	------	ENOG410YV7D	U:Intracellular trafficking, secretion, and vesicular transport	TMW88307.1	hypothetical protein EJD97_018732 [Solanum chilense]	sp|P82353|NLTP2_PRUAR;	Non-specific lipid-transfer protein 2 OS=Prunus armeniaca OX=36596 PE=1 SV=1;	PF14368.8;PF00234.24	LTP_2;Tryp_alpha_amyl	Probable lipid transfer;Protease inhibitor/seed storage/LTP family
gene_Solyc03g044300.3	Solyc03g044300.3	APETALA2a	5.29	5.93	4.92	2.19	1.95	2.36	5.38	2.16667	GO:0006952;GO:0006355;GO:0009873;GO:0005634;GO:0003700;GO:000367	BP:defense response;BP:regulation of transcription, DNA-templated;BP:ethylene-activated signaling pathway;CC:nucleus;MF:transcription factor activity, sequence-specific DNA binding;MF:DNA binding;	K09284	AP2	------	------	ENOG410YBZ8;ENOG410YD13	K:Transcription;	NP_001234452.1	APETALA2a [Solanum lycopersicum]	sp|P47927|AP2_ARATH;	Floral homeotic protein APETALA 2 OS=Arabidopsis thaliana OX=3702 GN=AP2 PE=1 SV=1;	PF00847.22	AP2	AP2 domain
gene_Solyc03g079960.5	Solyc03g079960.5	Thaumatin-like protein 1 (AHRD V3.11 *** tr|A0A1U8FYI6|A0A1U8FYI6_CAPAN)	3.23	3.18	1.36	1.12	1.1	0.97	2.59	1.06333	GO:0006952;GO:0016021;GO:000557	BP:defense response;CC:integral component of membrane;CC:extracellular region;	------	------	------	------	ENOG4111KEV	S:Function unknown	XP_004235045.1	thaumatin-like protein 1b [Solanum lycopersicum]	sp|Q5DWG1|CRJ35_CRYJA;	Pathogenesis-related thaumatin-like protein 3.5 OS=Cryptomeria japonica OX=3369 PE=1 SV=1;	PF00314.19	Thaumatin	Thaumatin family
gene_Solyc03g081230.1	Solyc03g081230.1	Late embryogenesis abundant (LEA) hydroxyproline-rich glycoprotein family (AHRD V3.3 *** Q9SVC8_ARATH)	10.75	11.06	11.24	5.56	4.38	5.04	11.0167	4.99333	GO:0046658;GO:0016021;GO:000950	CC:anchored component of plasma membrane;CC:integral component of membrane;CC:plasmodesma;	------	------	------	------	ENOG410YFTC	S:Function unknown	XP_004235025.1	NDR1/HIN1-like protein 26 [Solanum lycopersicum]	sp|Q9FI03|NHL26_ARATH;	NDR1/HIN1-like protein 26 OS=Arabidopsis thaliana OX=3702 GN=NHL26 PE=2 SV=1;	PF03168.15	LEA_2	Late embryogenesis abundant protein
gene_Solyc03g095970.3	Solyc03g095970.3	Short-chain dehydrogenase reductase 4 (AHRD V3.3 *** A0A2G3DIE1_CAPCH),Pfam:PF13561	44.68	51.18	64.65	17.82	33.76	18.58	53.5033	23.3867	GO:001649	MF:oxidoreductase activity;	------	------	------	------	COG1028	S:Function unknown	XP_004235238.1	short-chain dehydrogenase reductase 3b-like [Solanum lycopersicum]	sp|Q94K41|SDR3B_ARATH;	Short-chain dehydrogenase reductase 3b OS=Arabidopsis thaliana OX=3702 GN=SDR3b PE=2 SV=1;	PF13561.8;PF00106.27;PF08659.12	adh_short_C2;adh_short;KR	Enoyl;short chain dehydrogenase;KR domain
gene_Solyc03g112630.3	Solyc03g112630.3	plant UBX domain-containing protein 10-like (AHRD V3.3 *** A0A2G2XZ29_CAPAN)	31.29	30.19	24.43	12.62	12.2	13.12	28.6367	12.6467	GO:000551	MF:protein binding;	K18726	FAF2, UBXD8	------	------	ENOG410Y7PB	S:Function unknown	XP_010318999.1	plant UBX domain-containing protein 10 [Solanum lycopersicum]	sp|Q9M0N1|PUX10_ARATH;	Plant UBX domain-containing protein 10 OS=Arabidopsis thaliana OX=3702 GN=PUX10 PE=2 SV=1;	PF00789.22	UBX	UBX domain
gene_Solyc03g112790.3	Solyc03g112790.3	Wall-associated receptor kinase galacturonan-binding domain (AHRD V3.3 *** A0A200RDH2_9MAGN)	5.2	4.4	3.35	1.39	2.36	1.69	4.31667	1.81333	GO:0016021;GO:003024	CC:integral component of membrane;MF:polysaccharide binding;	------	------	------	------	ENOG410Y9ZY	S:Function unknown	XP_004236220.1	uncharacterized protein LOC101254679 [Solanum lycopersicum]	------	------	PF13947.8;PF14380.8	GUB_WAK_bind;WAK_assoc	Wall-associated receptor kinase galacturonan-binding;Wall-associated receptor kinase C-terminal
gene_Solyc03g114830.3	Solyc03g114830.3	FRUITFULL-like MADS-box 2	0.37	0.58	1	0.05	0.09	0.06	0.65	0.066667	GO:0006355;GO:0006357;GO:0045944;GO:0005634;GO:0003700;GO:0000977;GO:0003677;GO:0046983;GO:0000978;GO:000098	BP:regulation of transcription, DNA-templated;BP:regulation of transcription from RNA polymerase II promoter;BP:positive regulation of transcription from RNA polymerase II promoter;CC:nucleus;MF:transcription factor activity, sequence-specific DNA binding;MF:RNA polymerase II regulatory region sequence-specific DNA binding;MF:DNA binding;MF:protein dimerization activity;MF:RNA polymerase II core …	K09264	K09264	------	------	COG5068	K:Transcription	NP_001294867.1	transcription factor FRUITFULL [Solanum lycopersicum]	sp|Q42429|AGL8_SOLTU;	Agamous-like MADS-box protein AGL8 homolog OS=Solanum tuberosum OX=4113 PE=2 SV=1;	PF01486.19;PF00319.20	K-box;SRF-TF	K-box region;SRF-type transcription factor
gene_Solyc03g122360.3	Solyc03g122360.3	Cytochrome P450 (AHRD V3.3 *** Q43795_TOBAC)	64.2	40.87	47.65	18.18	22.36	19.79	50.9067	20.11	GO:0055114;GO:0016021;GO:0004497;GO:0020037;GO:0016705;GO:000550	BP:oxidation-reduction process;CC:integral component of membrane;MF:monooxygenase activity;MF:heme binding;MF:oxidoreductase activity, acting on paired donors, with incorporation or reduction of molecular oxygen;MF:iron ion binding;	K20623	CYP92A6	map00905	Brassinosteroid biosynthesis	COG2124	Q:Secondary metabolites biosynthesis, transport and catabolism	XP_004235547.1	cytochrome P450 71A1-like [Solanum lycopersicum]	sp|A0A1D6F9Y9|C92C6_MAIZE;	Trimethyltridecatetraene synthase OS=Zea mays OX=4577 GN=CYP92C6 PE=1 SV=1;	PF00067.24	p450	Cytochrome P450
gene_Solyc04g007350.3	Solyc04g007350.3	DUF1639 domain-containing protein (AHRD V3.3 *** A0A1Q3C214_CEPFO)	3	2.94	4.03	1.62	1.58	1.26	3.32333	1.48667	------	------	------	------	------	------	ENOG410YRGG	S:Function unknown	XP_004237003.1	uncharacterized protein LOC101260633 [Solanum lycopersicum]	------	------	PF07797.16	DUF1639	Protein of unknown function
gene_Solyc04g007780.3	Solyc04g007780.3	Sn.1	6.32	5.9	15.13	3.21	3.35	3.23	9.11667	3.26333	GO:000695	BP:defense response;	------	------	------	------	------	------	XP_004237023.1	MLP-like protein 43 [Solanum lycopersicum]	sp|Q9SSK5|MLP43_ARATH;	MLP-like protein 43 OS=Arabidopsis thaliana OX=3702 GN=MLP43 PE=1 SV=1;	PF00407.21	Bet_v_1	Pathogenesis-related protein Bet v 1 family
gene_Solyc04g007990.1	Solyc04g007990.1	hypothetical protein (AHRD V3.3 *** AT1G67920.1)	42.89	38.89	41.1	20.69	31.8	17.06	40.96	23.1833	------	------	------	------	------	------	ENOG41113YT	S:Function unknown	XP_010319387.1	uncharacterized protein LOC104646728 [Solanum lycopersicum]	------	------	------	------	------
gene_Solyc04g016060.1	Solyc04g016060.1	Protein MIZU-KUSSEI.1	4.76	4.73	4.55	2.02	2.54	1.33	4.68	1.96333	GO:001027	BP:hydrotropism;	------	------	------	------	ENOG4111IZ9	S:Function unknown	XP_004236600.1	protein MIZU-KUSSEI 1 [Solanum lycopersicum]	sp|O22227|MIZ1_ARATH;	Protein MIZU-KUSSEI 1 OS=Arabidopsis thaliana OX=3702 GN=MIZ1 PE=1 SV=1;	PF04759.15	DUF617	Protein of unknown function, DUF617
gene_Solyc04g049340.3	Solyc04g049340.3	Tryptophan/tyrosine permease (AHRD V3.3 *** A0A2U1PXY3_ARTAN)	13.27	14.01	15.88	4.9	7.96	6.09	14.3867	6.31667	GO:0015074;GO:0003333;GO:0016021;GO:0005886;GO:000367	BP:DNA integration;BP:amino acid transmembrane transport;CC:integral component of membrane;CC:plasma membrane;MF:nucleic acid binding;	K03834	tyrP	------	------	COG0814	E:Amino acid transport and metabolism	XP_004237675.1	uncharacterized protein LOC101258746 [Solanum lycopersicum]	sp|P44747|TYRPB_HAEIN;	Tyrosine-specific transport protein 2 OS=Haemophilus influenzae;	PF03222.15;PF01490.20	Trp_Tyr_perm;Aa_trans	Tryptophan/tyrosine permease family;Transmembrane amino acid transporter protein
gene_Solyc04g050270.1	Solyc04g050270.1	transmembrane protein (AHRD V3.3 *-* AT3G04310.2)	10.28	10.76	9.44	2.36	3.7	0	10.16	2.02	GO:001602	CC:integral component of membrane;	------	------	------	------	ENOG410YNA5;ENOG411180W	S:Function unknown;	XP_004237512.1	uncharacterized protein LOC101247423 [Solanum lycopersicum]	------	------	------	------	------
gene_Solyc04g054760.3	Solyc04g054760.3	FCS-Like Zinc finger 5 (AHRD V3.3 *** FLZ5_ARATH)	50.47	44.48	44.23	23.31	10.86	26.81	46.3933	20.3267	------	------	------	------	------	------	ENOG4111CFP	S:Function unknown	XP_004237417.1	uncharacterized protein LOC101267225 [Solanum lycopersicum]	sp|Q8VY80|FLZ5_ARATH;	FCS-Like Zinc finger 5 OS=Arabidopsis thaliana OX=3702 GN=FLZ5 PE=1 SV=1;	PF04570.16	zf-FLZ	zinc-finger of the FCS-type, C2-C2
gene_Solyc04g056425.2	Solyc04g056425.2	basic leucine zipper/W2 domain protein Chr1:1823347-1823670 FORWARD LENGTH=78 201606 (AHRD V3.11 *-* AT1G06010.1)	19.39	19.55	22.45	8.97	10.76	7.35	20.4633	9.02667	GO:001602	CC:integral component of membrane;	------	------	------	------	ENOG410ZCI1	S:Function unknown	XP_010319738.1	uncharacterized protein LOC101254784 [Solanum lycopersicum]	------	------	------	------	------
gene_Solyc04g074120.4	Solyc04g074120.4	synaptonemal complex protein 1-like (AHRD V3.3 *** A0A2I4GFH1_9ROSI)	2.76	1.83	1.65	1.06	0.68	0.95	2.08	0.896667	GO:000713	BP:reciprocal meiotic recombination;	------	------	------	------	ENOG410YEHK	S:Function unknown	XP_004238527.1	synaptonemal complex protein 1-like isoform X1 [Solanum lycopersicum]	sp|P61430|SYCP2_ARATH;	Synaptonemal complex protein 2 OS=Arabidopsis thaliana OX=3702 GN=ZYP1B PE=2 SV=1;	------	------	------
gene_Solyc04g077340.3	Solyc04g077340.3	G-type lectin S-receptor-like serine/threonine-protein kinase (AHRD V3.3 *** A0A2G2WZR9_CAPBA)	4.8	4.56	2.43	0.32	1.32	1.91	3.93	1.18333	GO:0006468;GO:0048544;GO:0016021;GO:0030246;GO:0005524;GO:0004672;GO:0106310;GO:010631	BP:protein phosphorylation;BP:recognition of pollen;CC:integral component of membrane;MF:carbohydrate binding;MF:ATP binding;MF:protein kinase activity;MF:old GO;MF:old GO;	------	------	------	------	COG0515	T:Signal transduction mechanisms	XP_025886297.1	uncharacterized protein LOC104647168 [Solanum lycopersicum]	sp|O81832|Y4729_ARATH;	G-type lectin S-receptor-like serine/threonine-protein kinase At4g27290 OS=Arabidopsis thaliana OX=3702 GN=At4g27290 PE=3 SV=4;	PF07714.19;PF00069.27;PF01453.26;PF00954.22;PF08276.13	PK_Tyr_Ser-Thr;Pkinase;B_lectin;S_locus_glycop;PAN_2	Protein tyrosine and serine/threonine kinase;Protein kinase domain;D-mannose binding lectin;S-locus glycoprotein domain;PAN-like domain
gene_Solyc04g079760.4	Solyc04g079760.4	UPF0114 domain-containing protein (AHRD V3.3 *** A0A1Q3D8A0_CEPFO)	59.17	27.98	33.08	12.09	16.13	4.6	40.0767	10.94	GO:001602	CC:integral component of membrane;	------	------	------	------	ENOG410YJNN	S:Function unknown	XP_004238209.1	uncharacterized protein LOC101245158 isoform X2 [Solanum lycopersicum]	------	------	PF03350.18	UPF0114	Uncharacterized protein family, UPF0114
gene_Solyc04g082380.4	Solyc04g082380.4	cytochrome P450 86A8-like (AHRD V3.3 *-* A0A2I4DDX4_9ROSI)	25.71	17.72	24.6	10.01	10.91	9.6	22.6767	10.1733	------	------	------	------	------	------	ENOG410YVM9	S:Function unknown	XP_004238424.1	uncharacterized protein LOC101257560 [Solanum lycopersicum]	------	------	------	------	------
gene_Solyc04g150159.1	Solyc04g150159.1	40S ribosomal protein S15a (AHRD V3.3 *** A0A2G3C780_CAPCH)	120.81	122.36	131.62	60.71	85.87	59.67	124.93	68.75	GO:0006412;GO:0022626;GO:0022627;GO:0005618;GO:0005829;GO:0005774;GO:0005886;GO:0042788;GO:0009506;GO:0005840;GO:000373	BP:translation;CC:cytosolic ribosome;CC:cytosolic small ribosomal subunit;CC:cell wall;CC:cytosol;CC:vacuolar membrane;CC:plasma membrane;CC:polysomal ribosome;CC:plasmodesma;CC:ribosome;MF:structural constituent of ribosome;	K02957	RP-S15Ae, RPS15A	map03010	Ribosome	COG0096	J:Translation, ribosomal structure and biogenesis	KJB20168.1	hypothetical protein B456_003G136100 [Gossypium raimondii]	sp|P42798|R15A1_ARATH;	40S ribosomal protein S15a-1 OS=Arabidopsis thaliana OX=3702 GN=RPS15AA PE=2 SV=2;	PF00410.21	Ribosomal_S8	Ribosomal protein S8
gene_Solyc05g006160.5	Solyc05g006160.5	Gibberellin regulated protein (AHRD V3.11 *** tr|A0A200QLE0|A0A200QLE0_9MAGN)	7.47	10.55	8.17	3.3	3.53	4.48	8.73	3.77	GO:0080043;GO:0008194;GO:008004	MF:quercetin 3-O-glucosyltransferase activity;MF:UDP-glycosyltransferase activity;MF:quercetin 7-O-glucosyltransferase activity;	K11820	UGT74B1	map00380;map00966	Tryptophan metabolism;Glucosinolate biosynthesis	COG1819	S:Function unknown	XP_010321154.3	UDP-glycosyltransferase 74B1-like, partial [Solanum lycopersicum]	sp|O48676|U74B1_ARATH;	UDP-glycosyltransferase 74B1 OS=Arabidopsis thaliana OX=3702 GN=UGT74B1 PE=1 SV=1;	PF02704.16	GASA	Gibberellin regulated protein
gene_Solyc05g009060.2	Solyc05g009060.2	Unknown protein	28.89	25.32	25.47	17.5	7.99	11.77	26.56	12.42	GO:001679	MF:phosphatase activity;	------	------	------	------	COG0631	T:Signal transduction mechanisms	TMW89213.1	hypothetical protein EJD97_017494 [Solanum chilense]	sp|O80492|P2C05_ARATH;	Probable protein phosphatase 2C 5 OS=Arabidopsis thaliana OX=3702 GN=At1g09160 PE=2 SV=1;	------	------	------
gene_Solyc05g010680.2	Solyc05g010680.2	Alpha/beta-Hydrolases superfamily protein (AHRD V3.3 *** F4J5H1_ARATH)	5.87	4.17	4.85	2.09	2.3	1.6	4.96333	1.99667	GO:001678	MF:hydrolase activity;	K01076	ABHD17	------	------	COG1073	S:Function unknown	XP_004239011.1	alpha/beta hydrolase domain-containing protein 17B-like [Solanum lycopersicum]	sp|Q7ZVZ7|AB17C_DANRE;	Alpha/beta hydrolase domain-containing protein 17C OS=Danio rerio OX=7955 GN=abhd17c PE=2 SV=1;	PF12146.10;PF00561.22;PF00326.23;PF06342.14;PF12697.9;PF01738.20	Hydrolase_4;Abhydrolase_1;Peptidase_S9;DUF1057;Abhydrolase_6;DLH	Serine aminopeptidase, S33;alpha/beta hydrolase fold;Prolyl oligopeptidase family;Alpha/beta hydrolase of unknown function;Alpha/beta hydrolase family;Dienelactone hydrolase family
gene_Solyc05g010770.4	Solyc05g010770.4	Unknown protein	1.61	1.65	1.87	0.16	0	0	1.71	0.053333	------	------	------	------	------	------	------	------	------	------	------	------	------	------	------
gene_Solyc05g011890.1	Solyc05g011890.1	Sulfotransferase (AHRD V3.3 *** A0A2G3B6Y2_CAPCH)	40.4	29.5	26.43	10.39	13.89	9.45	32.11	11.2433	GO:0051923;GO:0005737;GO:000814	BP:sulfation;CC:cytoplasm;MF:sulfotransferase activity;	------	------	------	------	ENOG4111H56	S:Function unknown	XP_004239020.1	cytosolic sulfotransferase 12-like [Solanum lycopersicum]	sp|P52839|SOT12_ARATH;	Cytosolic sulfotransferase 12 OS=Arabidopsis thaliana OX=3702 GN=SOT12 PE=1 SV=2;	PF00685.29;PF13469.8	Sulfotransfer_1;Sulfotransfer_3	Sulfotransferase domain;Sulfotransferase family
gene_Solyc05g013260.4	Solyc05g013260.4	Prf (AHRD V3.11 *-* tr|Q9LLD0|Q9LLD0_SOLLC)	14.85	15.9	15.31	7.37	5.51	6.86	15.3533	6.58	GO:0006952;GO:0009626;GO:0005737;GO:0016020;GO:004353	BP:defense response;BP:plant-type hypersensitive response;CC:cytoplasm;CC:membrane;MF:ADP binding;	------	------	------	------	COG4886	S:Function unknown	XP_025886878.1	LOW QUALITY PROTEIN: putative late blight resistance protein homolog R1A-4 [Solanum lycopersicum]	------	------	------	------	------
gene_Solyc05g013410.3	Solyc05g013410.3	F-box protein (AHRD V3.3 *** A0A2G2VNJ4_CAPBA)	8.29	8.22	7.58	3.55	3.06	3.57	8.03	3.39333	GO:000551	MF:protein binding;	------	------	------	------	COG0790	S:Function unknown	XP_004239122.1	F-box protein At1g70590 [Solanum lycopersicum]	sp|Q94C27|FB84_ARATH;	F-box protein At1g70590 OS=Arabidopsis thaliana OX=3702 GN=At1g70590 PE=2 SV=1;	PF08238.14;PF13181.8;PF12937.9;PF00646.35	Sel1;TPR_8;F-box-like;F-box	Sel1 repeat;Tetratricopeptide repeat;F-box-like;F-box domain
gene_Solyc05g043330.3	Solyc05g043330.3	GDSL esterase/lipase (AHRD V3.3 *** A0A2G2Z312_CAPAN)	19.3	28.41	22.91	8.29	14.93	6.7	23.54	9.97333	GO:0016021;GO:001678	CC:integral component of membrane;MF:hydrolase activity, acting on ester bonds;	------	------	------	------	COG3240	S:Function unknown	XP_004240155.1	GDSL esterase/lipase At2g04570 [Solanum lycopersicum]	sp|Q9SJB4|GDL34_ARATH;	GDSL esterase/lipase At2g04570 OS=Arabidopsis thaliana OX=3702 GN=At2g04570 PE=2 SV=1;	PF00657.24	Lipase_GDSL	GDSL-like Lipase/Acylhydrolase
gene_Solyc05g053550.3	Solyc05g053550.3	chalcone synthase 2	246.58	249.52	272.35	71.64	107.67	46.49	256.15	75.2667	GO:0030639;GO:0009813;GO:0016210;GO:001674	BP:polyketide biosynthetic process;BP:flavonoid biosynthetic process;MF:naringenin-chalcone synthase activity;MF:transferase activity, transferring acyl groups other than amino-acyl groups;	K00660	CHS	map04712;map00960;map00941	Circadian rhythm - plant;Tropane, piperidine and pyridine alkaloid biosynthesis;Flavonoid biosynthesis	COG3424	Q:Secondary metabolites biosynthesis, transport and catabolism	NP_001234036.2	chalcone synthase 2 [Solanum lycopersicum]	sp|P23419|CHS2_SOLLC;	Chalcone synthase 2 OS=Solanum lycopersicum OX=4081 GN=CHS2 PE=2 SV=2;	PF00195.21;PF02797.17;PF08541.12;PF08545.12;PF08392.14	Chal_sti_synt_N;Chal_sti_synt_C;ACP_syn_III_C;ACP_syn_III;FAE1_CUT1_RppA	Chalcone and stilbene synthases, N-terminal domain;Chalcone and stilbene synthases, C-terminal domain;3-Oxoacyl-[acyl-carrier-protein;3-Oxoacyl-[acyl-carrier-protein;FAE1/Type III polyketide synthase-like protein
gene_Solyc05g055290.3	Solyc05g055290.3	Alpha/beta-Hydrolases superfamily protein (AHRD V3.3 *** A0A2U1MAY4_ARTAN)	1.54	1.04	1.12	0.26	0.3	0.07	1.23333	0.21	------	------	------	------	------	------	ENOG4111QDI	S:Function unknown	XP_004239724.1	uncharacterized protein LOC101244873 [Solanum lycopersicum]	------	------	PF00561.22;PF12146.10;PF12697.9	Abhydrolase_1;Hydrolase_4;Abhydrolase_6	alpha/beta hydrolase fold;Serine aminopeptidase, S33;Alpha/beta hydrolase family
gene_Solyc05g056170.3	Solyc05g056170.3	Phenylalanine ammonia-lyase (AHRD V3.3 *** A0A2G2WVC6_CAPBA)	36.27	33.98	27.06	13.78	17.25	8.9	32.4367	13.31	GO:0009800;GO:0006559;GO:0005737;GO:0045548;GO:001684	BP:cinnamic acid biosynthetic process;BP:L-phenylalanine catabolic process;CC:cytoplasm;MF:phenylalanine ammonia-lyase activity;MF:ammonia-lyase activity;	K10775	PAL	map00940;map00360	Phenylpropanoid biosynthesis;Phenylalanine metabolism	COG2986	E:Amino acid transport and metabolism	NP_001307530.1	phenylalanine ammonia-lyase 2 [Solanum lycopersicum]	sp|Q50EX7|PAL1_PETHY;	Phenylalanine ammonia-lyase 1 OS=Petunia hybrida OX=4102 GN=PAL1 PE=1 SV=1;	PF00221.21	Lyase_aromatic	Aromatic amino acid lyase
gene_Solyc06g007130.5.1	Solyc06g007130.5.1	omega-3 fatty acid desaturase -3	33.58	29.49	32.93	11.03	16.26	10.22	32	12.5033	GO:0006629;GO:0016021;GO:001671	BP:lipid metabolic process;CC:integral component of membrane;MF:oxidoreductase activity, acting on paired donors, with oxidation of a pair of donors resulting in the reduction of molecular oxygen to two molecules of water;	K10257	FAD3, FAD7, FAD8, desB	------	------	COG3239	I:Lipid transport and metabolism	NP_001233791.2	omega-3 fatty acid desaturase [Solanum lycopersicum]	sp|P48626|FAD3E_TOBAC;	Omega-3 fatty acid desaturase, endoplasmic reticulum OS=Nicotiana tabacum OX=4097 GN=FAD3 PE=2 SV=1;	PF00487.26;PF11960.10	FA_desaturase;DUF3474	Fatty acid desaturase;Domain of unknown function
gene_Solyc06g007220.4	Solyc06g007220.4	Unknown protein	225.86	224.43	351.34	171.48	183.14	154.03	267.21	169.55	------	------	------	------	------	------	------	------	KAG5598480.1	hypothetical protein H5410_029850 [Solanum commersonii]	------	------	------	------	------
gene_Solyc06g009770.1	Solyc06g009770.1	hypothetical protein (AHRD V3.3 *** AT3G62650.2)	31.3	24.11	20.79	11.52	20.22	13.4	25.4	15.0467	GO:001674	MF:transferase activity;	------	------	------	------	ENOG410ZHKU	S:Function unknown	XP_010321877.1	uncharacterized protein LOC101249177 [Solanum lycopersicum]	------	------	------	------	------
gene_Solyc06g035700.1	Solyc06g035700.1	Ethylene-responsive transcription factor (AHRD V3.3 *** A0A2G2WIL9_CAPBA)	5.68	4.03	2.54	1.13	0.65	0	4.08333	0.593333	GO:0006952;GO:0006355;GO:0009873;GO:0005634;GO:0003700;GO:000367	BP:defense response;BP:regulation of transcription, DNA-templated;BP:ethylene-activated signaling pathway;CC:nucleus;MF:transcription factor activity, sequence-specific DNA binding;MF:DNA binding;	------	------	------	------	ENOG410YMJJ	K:Transcription	XP_004240742.1	ethylene-responsive transcription factor ERF025-like [Solanum lycopersicum]	sp|Q9FJ90|ERF25_ARATH;	Ethylene-responsive transcription factor ERF025 OS=Arabidopsis thaliana OX=3702 GN=ERF025 PE=2 SV=1;	PF00847.22	AP2	AP2 domain
gene_Solyc06g061010.5	Solyc06g061010.5	FCS-Like Zinc finger 2 (AHRD V3.11 *-* sp|Q8VZM9|FLZ2_ARATH)	15.11	14.5	19.76	6.58	7.23	6.51	16.4567	6.77333	GO:0006355;GO:000827	BP:regulation of transcription, DNA-templated;MF:zinc ion binding;	------	------	------	------	ENOG410YW5U	S:Function unknown	XP_004241979.1	uncharacterized protein LOC101246541 [Solanum lycopersicum]	sp|Q9FGQ9|FLZ1_ARATH;	FCS-Like Zinc finger 1 OS=Arabidopsis thaliana OX=3702 GN=FLZ1 PE=1 SV=1;	PF04570.16	zf-FLZ	zinc-finger of the FCS-type, C2-C2
gene_Solyc06g069230.3	Solyc06g069230.3	DNA mismatch repair protein MutS (AHRD V3.3 *** A0A200Q8J6_9MAGN)	4.87	3.95	6.34	1.93	2.31	1.76	5.05333	2	GO:0006310;GO:0045910;GO:0006301;GO:0006298;GO:0043570;GO:0005634;GO:0032300;GO:0032301;GO:0032302;GO:0008094;GO:0000406;GO:0030983;GO:000552	BP:DNA recombination;BP:negative regulation of DNA recombination;BP:postreplication repair;BP:mismatch repair;BP:maintenance of DNA repeat elements;CC:nucleus;CC:mismatch repair complex;CC:MutSalpha complex;CC:MutSbeta complex;MF:DNA-dependent ATPase activity;MF:double-strand/single-strand DNA junction binding;MF:mismatched DNA binding;MF:ATP binding;	K08735	MSH2	map03430	Mismatch repair	COG0249	L:Replication, recombination and repair	NP_001234067.1	mismatch repair protein [Solanum lycopersicum]	sp|O24617|MSH2_ARATH;	DNA mismatch repair protein MSH2 OS=Arabidopsis thaliana OX=3702 GN=MSH2 PE=1 SV=1;	PF00488.23;PF05192.20;PF05190.20;PF05188.19;PF01624.22	MutS_V;MutS_III;MutS_IV;MutS_II;MutS_I	MutS domain V;MutS domain III;MutS family domain IV;MutS domain II;MutS domain I
gene_Solyc06g071500.3	Solyc06g071500.3	Boron transporter.1	41.93	27.18	30.37	14.22	14.91	12.58	33.16	13.9033	GO:0006820;GO:0055085;GO:0050801;GO:0016021;GO:0005886;GO:0022857;GO:000545	BP:anion transport;BP:transmembrane transport;BP:ion homeostasis;CC:integral component of membrane;CC:plasma membrane;MF:transmembrane transporter activity;MF:inorganic anion exchanger activity;	K24194	BOR	------	------	ENOG410XPHD	U:Intracellular trafficking, secretion, and vesicular transport	XP_004241498.1	probable boron transporter 2 [Solanum lycopersicum]	sp|Q9M1P7|BOR2_ARATH;	Probable boron transporter 2 OS=Arabidopsis thaliana OX=3702 GN=BOR2 PE=2 SV=1;	PF00955.23	HCO3_cotransp	HCO3- transporter family
gene_Solyc06g072060.1	Solyc06g072060.1	Transmembrane protein, putative (DUF 3339) (AHRD V3.3 *** Q8LBX6_ARATH)	14.25	15.04	8.46	8.83	2.25	0	12.5833	3.69333	GO:001602	CC:integral component of membrane;	------	------	------	------	------	------	TMW86591.1	hypothetical protein EJD97_021142 [Solanum chilense]	------	------	PF11820.10	DUF3339	Protein of unknown function
gene_Solyc06g072840.3	Solyc06g072840.3	hypothetical protein (AHRD V3.3 *** AT3G03150.1)	12.64	11	15.16	5.25	5.54	3.71	12.9333	4.83333	------	------	------	------	------	------	ENOG410ZHAM	S:Function unknown	XP_004241438.1	late embryogenesis abundant protein At5g17165 [Solanum lycopersicum]	sp|F4KFM8|LEA65_ARATH;	Late embryogenesis abundant protein At5g17165 OS=Arabidopsis thaliana OX=3702 GN=At5g17165 PE=3 SV=1;	------	------	------
gene_Solyc06g074710.1	Solyc06g074710.1	Transferase (AHRD V3.3 *** A0A200R9R6_9MAGN)	0.68	0.38	0.26	0	0	0.06	0.44	0.02	GO:0009809;GO:0010252;GO:0009963;GO:0005829;GO:0016020;GO:0047172;GO:0016747;GO:004720	BP:lignin biosynthetic process;BP:auxin homeostasis;BP:positive regulation of flavonoid biosynthetic process;CC:cytosol;CC:membrane;MF:shikimate O-hydroxycinnamoyltransferase activity;MF:transferase activity, transferring acyl groups other than amino-acyl groups;MF:quinate O-hydroxycinnamoyltransferase activity;	K13065	E2.3.1.133, HCT	map00941;map00940;map00945	Flavonoid biosynthesis;Phenylpropanoid biosynthesis;Stilbenoid, diarylheptanoid and gingerol biosynthesis	ENOG410XTI7	S:Function unknown	XP_004241296.1	agmatine coumaroyltransferase-2 [Solanum lycopersicum]	sp|Q7XPK7|AHT1_ORYSJ;	Agmatine hydroxycinnamoyltransferase 1 OS=Oryza sativa subsp. japonica OX=39947 GN=AHT1 PE=1 SV=1;	PF02458.17	Transferase	Transferase family
gene_Solyc06g074900.3	Solyc06g074900.3	bacterial trigger factor (AHRD V3.3 *** AT2G30695.3)	7.65	8.7	8.96	2.68	4.29	4.59	8.43667	3.85333	GO:0006457;GO:0051083;GO:0043335;GO:0015031;GO:0061077;GO:0044183;GO:0003755;GO:004302	BP:protein folding;BP:'de novo' cotranslational protein folding;BP:protein unfolding;BP:protein transport;BP:chaperone-mediated protein folding;MF:protein binding involved in protein folding;MF:peptidyl-prolyl cis-trans isomerase activity;MF:ribosome binding;	------	------	------	------	ENOG410YJEJ;ENOG410YPDJ	S:Function unknown;	XP_019070028.1	uncharacterized protein LOC101267317 [Solanum lycopersicum]	sp|Q55511|TIG_SYNY3;	Trigger factor OS=Synechocystis sp.;	PF05697.15	Trigger_N	Bacterial trigger factor protein
gene_Solyc06g082410.1	Solyc06g082410.1	Major facilitator superfamily protein (AHRD V3.3 *-* A0A2U1QBS1_ARTAN)	6.92	6.9	6.55	5.66	3.91	5.22	6.79	4.93	GO:0006817;GO:0016021;GO:001602	BP:phosphate ion transport;CC:integral component of membrane;CC:membrane;	------	------	------	------	ENOG410Y90Q	S:Function unknown	XP_004242491.1	protein NUCLEAR FUSION DEFECTIVE 4 [Solanum lycopersicum]	sp|F4I9E1|NFD4_ARATH;	Protein NUCLEAR FUSION DEFECTIVE 4 OS=Arabidopsis thaliana OX=3702 GN=NFD4 PE=3 SV=1;	------	------	------
gene_Solyc06g084220.1	Solyc06g084220.1	Heat shock protein (AHRD V3.3 *** Q8VY73_ARATH)	9.47	8.71	10.89	7.32	4.55	3.39	9.69	5.08667	------	------	------	------	------	------	ENOG41128RQ	S:Function unknown	XP_004242529.1	uncharacterized protein LOC101259552 [Solanum lycopersicum]	------	------	------	------	------
gene_Solyc06g084380.4	Solyc06g084380.4	2-oxoglutarate (2OG) and Fe(II)-dependent oxygenase-like protein (AHRD V3.3 *** G5DX62_SILLA)	1.91	2.01	2.92	1.45	0.78	0.72	2.28	0.983333	GO:001649	MF:oxidoreductase activity;	K10767	ALKBH5	------	------	COG3145	L:Replication, recombination and repair	XP_010323031.1	uncharacterized protein LOC101258968 isoform X1 [Solanum lycopersicum]	sp|Q9ZT92|AK10B_ARATH;	RNA demethylase ALKBH10B OS=Arabidopsis thaliana OX=3702 GN=ALKBH10B PE=1 SV=1;	------	------	------
gene_Solyc07g005410.3	Solyc07g005410.3	Cytochrome c oxidase%2C subunit Vib family protein (AHRD V3.3 *** AT5G58005.2)	1.87	1.83	1.49	0.76	0.17	0.34	1.73	0.423333	GO:0045277;GO:000573	CC:respiratory chain complex IV;CC:mitochondrion;	K18179	COA6	------	------	ENOG4112119	S:Function unknown	XP_004242578.1	uncharacterized protein LOC101263329 [Solanum lycopersicum]	------	------	PF02297.19	COX6B	Cytochrome oxidase c subunit VIb
gene_Solyc07g006740.3	Solyc07g006740.3	Protein DETOXIFICATION (AHRD V3.3 *** A0A2I4FHR8_9ROSI)	7.73	5.23	7.79	2.65	2.63	2.78	6.91667	2.68667	GO:0006855;GO:0055085;GO:0016021;GO:0016020;GO:0015297;GO:0015238;GO:0022857;GO:004291	BP:drug transmembrane transport;BP:transmembrane transport;CC:integral component of membrane;CC:membrane;MF:antiporter activity;MF:drug transmembrane transporter activity;MF:transmembrane transporter activity;MF:xenobiotic transporter activity;	K03327	TC.MATE, SLC47A, norM, mdtK, dinF	------	------	COG0534	V:Defense mechanisms	XP_004243012.1	protein DETOXIFICATION 16-like [Solanum lycopersicum]	sp|Q9FHB6|DTX16_ARATH;	Protein DETOXIFICATION 16 OS=Arabidopsis thaliana OX=3702 GN=DTX16 PE=2 SV=1;	PF01554.20	MatE	MatE
gene_Solyc07g007150.1	Solyc07g007150.1	hypothetical protein (AHRD V3.3 -** AT5G35090.1)	32.59	30.11	26.21	17.2	19.22	14.97	29.6367	17.13	------	------	------	------	------	------	ENOG4111DBN	S:Function unknown	XP_010323473.1	uncharacterized protein LOC104648246 [Solanum lycopersicum]	------	------	------	------	------
gene_Solyc07g009000.1	Solyc07g009000.1	Photosystem II CP43 reaction center protein (AHRD V3.3 *-* A0A2G2ZTY9_CAPAN)	6.03	2.9	1.23	0	0.33	0.59	3.38667	0.306667	GO:0018298;GO:0019684;GO:0009772;GO:0009767;GO:0009535;GO:0016020;GO:0009536;GO:0009523;GO:0009521;GO:0016021;GO:0042170;GO:0016168;GO:0010242;GO:0045156;GO:004687	BP:protein-chromophore linkage;BP:photosynthesis, light reaction;BP:photosynthetic electron transport in photosystem II;BP:photosynthetic electron transport chain;CC:chloroplast thylakoid membrane;CC:membrane;CC:plastid;CC:photosystem II;CC:photosystem;CC:integral component of membrane;CC:plastid membrane;MF:chlorophyll binding;MF:oxygen evolving activity;MF:electron transporter, transferring ele…	K02705	psbC	map00195	Photosynthesis	ENOG41107KC;ENOG410XQVF	O:Posttranslational modification, protein turnover, chaperones;S:Function unknown	KAF5806660.1	putative photosystem antenna protein [Helianthus annuus]	sp|A4QJB1|PSBC_AETCO;	Photosystem II CP43 reaction center protein OS=Aethionema cordifolium OX=434059 GN=psbC PE=3 SV=1;	PF00421.21	PSII	Photosystem II protein
gene_Solyc07g020800.3	Solyc07g020800.3	Rac-like GTP binding protein (AHRD V3.3 *** Q9S821_PHYPA)	17.51	18.87	21.33	6.67	10.26	6.63	19.2367	7.85333	GO:0007015;GO:0008360;GO:0030865;GO:0007163;GO:0032956;GO:0007264;GO:0005856;GO:0042995;GO:0043231;GO:0031410;GO:0005634;GO:0005886;GO:0005938;GO:0003924;GO:0019901;GO:000552	BP:actin filament organization;BP:regulation of cell shape;BP:cortical cytoskeleton organization;BP:establishment or maintenance of cell polarity;BP:regulation of actin cytoskeleton organization;BP:small GTPase mediated signal transduction;CC:cytoskeleton;CC:cell projection;CC:intracellular membrane-bounded organelle;CC:cytoplasmic vesicle;CC:nucleus;CC:plasma membrane;CC:cell cortex;MF:GTPase ac…	K04392	RAC1	map04145	Phagosome	COG1100	S:Function unknown	XP_010323415.1	rac-like GTP-binding protein ARAC7 [Solanum lycopersicum]	sp|O82480|RAC7_ARATH;	Rac-like GTP-binding protein ARAC7 OS=Arabidopsis thaliana OX=3702 GN=ARAC7 PE=1 SV=1;	PF00071.24;PF08477.15	Ras;Roc	Ras family;Ras of Complex, Roc, domain of DAPkinase
gene_Solyc07g025530.1	Solyc07g025530.1	Methyltransf_.1	12	11.76	9.06	6.76	5.27	2.41	10.94	4.81333	GO:000816	MF:methyltransferase activity;	------	------	------	------	ENOG410Y3VV	S:Function unknown	XP_010323459.1	uncharacterized protein LOC101254708 [Solanum lycopersicum]	------	------	------	------	------
gene_Solyc07g042520.4	Solyc07g042520.4	Sucrose synthase (AHRD V3.3 *** K4CEB3_SOLLC)	2.09	1	0.75	0.43	0.35	0.15	1.28	0.31	GO:0005985;GO:001615	BP:sucrose metabolic process;MF:sucrose synthase activity;	K00695	SUS	map00500	Starch and sucrose metabolism	COG0438	M:Cell wall/membrane/envelope biogenesis	XP_004243680.1	sucrose synthase-like [Solanum lycopersicum]	sp|P10691|SUS1_SOLTU;	Sucrose synthase OS=Solanum tuberosum OX=4113 PE=2 SV=1;	PF00862.21;PF00534.22;PF13692.8	Sucrose_synth;Glycos_transf_1;Glyco_trans_1_4	Sucrose synthase;Glycosyl transferases group 1;Glycosyl transferases group 1
gene_Solyc07g055910.4	Solyc07g055910.4	hypothetical protein (AHRD V3.3 *-* AT3G58770.1)	2.37	2.07	2.46	0.92	0.95	0.72	2.3	0.863333	------	------	------	------	------	------	ENOG410YV8C	S:Function unknown	XP_010323641.1	uncharacterized protein LOC101250820 isoform X2 [Solanum lycopersicum]	------	------	------	------	------
gene_Solyc07g056500.4	Solyc07g056500.4	glutathione S-transferase T5	14.87	10.61	11.64	7.78	3.29	4.65	12.3733	5.24	GO:0006749;GO:0005737;GO:0016740;GO:0004364;GO:000551	BP:glutathione metabolic process;CC:cytoplasm;MF:transferase activity;MF:glutathione transferase activity;MF:protein binding;	K00799	GST, gst	map00480	Glutathione metabolism	ENOG410XSIX	O:Posttranslational modification, protein turnover, chaperones	NP_001234094.1	uncharacterized protein LOC543817 [Solanum lycopersicum]	sp|P49332|GSTXC_TOBAC;	Probable glutathione S-transferase parC OS=Nicotiana tabacum OX=4097 GN=PARC PE=2 SV=1;	PF02798.22;PF13417.8;PF13409.8;PF13410.8;PF00043.27	GST_N;GST_N_3;GST_N_2;GST_C_2;GST_C	Glutathione S-transferase, N-terminal domain;Glutathione S-transferase, N-terminal domain;Glutathione S-transferase, N-terminal domain;Glutathione S-transferase, C-terminal domain;Glutathione S-transferase, C-terminal domain
gene_Solyc08g005640.4	Solyc08g005640.4	Terpene synthase (AHRD V3.3 *** G5CV51_SOLLC)	3.59	2.69	2.58	0.85	0.75	0.74	2.95333	0.78	GO:0009686;GO:0016102;GO:0009507;GO:0016829;GO:0000287;GO:001033	BP:gibberellin biosynthetic process;BP:diterpenoid biosynthetic process;CC:chloroplast;MF:lyase activity;MF:magnesium ion binding;MF:terpene synthase activity;	K18116	E4.2.3.51, PHS1	------	------	------	------	XP_025888303.1	beta-phellandrene synthase (neryl-diphosphate-cyclizing), chloroplastic-like [Solanum lycopersicum]	sp|C1K5M3|PHS1_SOLLC;	Beta-phellandrene synthase;	PF03936.18;PF01397.23;PF19086.2	Terpene_synth_C;Terpene_synth;Terpene_syn_C_2	Terpene synthase family, metal binding domain;Terpene synthase, N-terminal domain;Terpene synthase family 2, C-terminal metal binding
gene_Solyc08g006470.5	Solyc08g006470.5	Zinc finger protein (AHRD V3.11 *** tr|A0A2U1NTB4|A0A2U1NTB4_ARTAN)	15.52	12.34	10.8	0	0	0	12.8867	0	GO:0042273;GO:0005737;GO:0030687;GO:0008270;GO:000367	BP:ribosomal large subunit biogenesis;CC:cytoplasm;CC:preribosome, large subunit precursor;MF:zinc ion binding;MF:nucleic acid binding;	K14816	REI1	------	------	ENOG410XPH0	S:Function unknown	XP_004244493.1	cytoplasmic 60S subunit biogenesis factor REI1 homolog 1 [Solanum lycopersicum]	sp|Q9ZQ18|REIL2_ARATH;	Cytoplasmic 60S subunit biogenesis factor REI1 homolog 2 OS=Arabidopsis thaliana OX=3702 GN=REIL2 PE=1 SV=1;	PF12756.9;PF12171.10	zf-C2H2_2;zf-C2H2_jaz	C2H2 type zinc-finger;Zinc-finger double-stranded RNA-binding
gene_Solyc08g006710.3	Solyc08g006710.3	Unknown protein	35.07	26.71	18.97	13.52	15.42	16.31	26.9167	15.0833	GO:0006979;GO:000460	BP:response to oxidative stress;MF:glutathione peroxidase activity;	------	------	------	------	------	------	TMW80780.1	hypothetical protein EJD97_015194 [Solanum chilense]	------	------	------	------	------
gene_Solyc08g006770.3	Solyc08g006770.3	2-oxoglutarate (2OG) and Fe(II)-dependent oxygenase superfamily protein (AHRD V3.3 *** A0A2U1MCV6_ARTAN)	202.67	195.23	160.06	78.55	83.45	78.92	185.987	80.3067	GO:0055114;GO:0031418;GO:0046872;GO:0051213;GO:001649	BP:oxidation-reduction process;MF:L-ascorbic acid binding;MF:metal ion binding;MF:dioxygenase activity;MF:oxidoreductase activity;	------	------	------	------	COG3491	S:Function unknown	XP_004244522.1	protein DMR6-LIKE OXYGENASE 2 [Solanum lycopersicum]	sp|Q6Z244|ODD19_ORYSJ;	2-oxoglutarate-dependent dioxygenase 19 OS=Oryza sativa subsp. japonica OX=39947 GN=2ODD19 PE=1 SV=1;	PF03171.22;PF14226.8	2OG-FeII_Oxy;DIOX_N	2OG-F;non-haem dioxygenase in morphine synthesis N-terminal
gene_Solyc08g007820.1	Solyc08g007820.1	Dehydration-responsive element-binding protein 1E (AHRD V3.3 *** A0A2G2W337_CAPBA)	6.58	3.88	2.96	1.97	1.57	1.55	4.47333	1.69667	GO:0006952;GO:0006355;GO:0009873;GO:0005634;GO:0003700;GO:000367	BP:defense response;BP:regulation of transcription, DNA-templated;BP:ethylene-activated signaling pathway;CC:nucleus;MF:transcription factor activity, sequence-specific DNA binding;MF:DNA binding;	------	------	------	------	------	------	XP_010324621.1	dehydration-responsive element-binding protein 1E-like [Solanum lycopersicum]	sp|Q9FJ93|DRE1D_ARATH;	Dehydration-responsive element-binding protein 1D OS=Arabidopsis thaliana OX=3702 GN=DREB1D PE=2 SV=1;	PF00847.22	AP2	AP2 domain
gene_Solyc08g065420.3	Solyc08g065420.3	bell-like homeodomain protein 4	34.88	27.8	27.4	14.17	12.41	13.51	30.0267	13.3633	GO:0006355;GO:0006357;GO:0005634;GO:0003677;GO:0000978;GO:000098	BP:regulation of transcription, DNA-templated;BP:regulation of transcription from RNA polymerase II promoter;CC:nucleus;MF:DNA binding;MF:RNA polymerase II core promoter proximal region sequence-specific DNA binding;MF:RNA polymerase II transcription factor activity, sequence-specific DNA binding;	------	------	------	------	ENOG410XPMQ	K:Transcription	XP_004245109.3	homeobox protein ATH1 [Solanum lycopersicum]	sp|P48731|ATH1_ARATH;	Homeobox protein ATH1 OS=Arabidopsis thaliana OX=3702 GN=ATH1 PE=1 SV=1;	PF07526.13;PF05920.13;PF00046.31	POX;Homeobox_KN;Homeodomain	Associated with HOX;Homeobox KN domain;Homeodomain
gene_Solyc08g068160.2	Solyc08g068160.2	Flavin-containing monooxygenase (AHRD V3.3 *** D2IGV1_SOLLC)	1.85	2.39	2.76	1.22	0.75	0.85	2.33333	0.94	GO:0055114;GO:0050661;GO:0050660;GO:0004499;GO:000449	BP:oxidation-reduction process;MF:NADP binding;MF:flavin adenine dinucleotide binding;MF:N,N-dimethylaniline monooxygenase activity;MF:monooxygenase activity;	K11816	YUCCA	map00380	Tryptophan metabolism	COG2072	P:Inorganic ion transport and metabolism	NP_001317920.1	flavin monooxygenase-like protein [Solanum lycopersicum]	sp|Q8VZ59|YUC6_ARATH;	Indole-3-pyruvate monooxygenase YUCCA6 OS=Arabidopsis thaliana OX=3702 GN=YUC6 PE=1 SV=1;	PF00743.21;PF13738.8;PF13434.8;PF07992.16;PF13450.8;PF01494.21;PF01946.19;PF03486.16	FMO-like;Pyr_redox_3;K_oxygenase;Pyr_redox_2;NAD_binding_8;FAD_binding_3;Thi4;HI0933_like	Flavin-binding monooxygenase-like;Pyridine nucleotide-disulphide oxidoreductase;L-lysine 6-monooxygenase;Pyridine nucleotide-disulphide oxidoreductase;NA;FAD binding domain;Thi4 family;HI0933-like protein
gene_Solyc08g068850.3	Solyc08g068850.3	proton pump-interactor 1-like (AHRD V3.3 *-* A0A2I4H3B3_9ROSI)	3.59	2.7	4.04	2.19	0.44	0.36	3.44333	0.996667	------	------	------	------	------	------	------	------	NP_001316136.1	uncharacterized protein LOC101268894 isoform 1 [Solanum lycopersicum]	------	------	------	------	------
gene_Solyc08g077180.3	Solyc08g077180.3	Pyruvate kinase (AHRD V3.3 *** A0A1U8GRH5_CAPAN)	27.84	19.29	24.51	11.13	10.99	8.37	23.88	10.1633	GO:0006096;GO:0005737;GO:0009570;GO:0030955;GO:0016301;GO:0000287;GO:0004743;GO:000552	BP:glycolytic process;CC:cytoplasm;CC:chloroplast stroma;MF:potassium ion binding;MF:kinase activity;MF:magnesium ion binding;MF:pyruvate kinase activity;MF:ATP binding;	K00873	PK, pyk	map00010;map00620	Glycolysis / Gluconeogenesis;Pyruvate metabolism	COG0469	G:Carbohydrate transport and metabolism	XP_004245876.1	pyruvate kinase isozyme G, chloroplastic [Solanum lycopersicum]	sp|Q40546|KPYG_TOBAC;	Pyruvate kinase isozyme G, chloroplastic OS=Nicotiana tabacum OX=4097 PE=2 SV=1;	PF00224.23;PF02887.18	PK;PK_C	Pyruvate kinase, barrel domain;Pyruvate kinase, alpha/beta domain
gene_Solyc08g077490.2	Solyc08g077490.2	Vacuolar protein sorting 13 (AHRD V3.3 *-* J7FHV5_MESCR)	1.27	0.88	0.46	0	0	0	0.87	0	GO:001602	CC:integral component of membrane;	K19525	VPS13A_C	------	------	COG5043	U:Intracellular trafficking, secretion, and vesicular transport	TMX02660.1	hypothetical protein EJD97_020565 [Solanum chilense]	sp|Q96RL7|VP13A_HUMAN;	Vacuolar protein sorting-associated protein 13A OS=Homo sapiens OX=9606 GN=VPS13A PE=1 SV=2;	PF16908.7;PF12624.9;PF16910.7	VPS13;Chorein_N;VPS13_mid_rpt	Vacuolar sorting-associated protein 13, N-terminal;N-terminal region of Chorein or VPS13;Repeating coiled region of VPS13
gene_Solyc09g007980.1	Solyc09g007980.1	Unknown protein	14.5	7.07	5.98	7.46	1.87	3.7	9.18333	4.34333	GO:001602	CC:integral component of membrane;	------	------	------	------	------	------	TMW96050.1	hypothetical protein EJD97_008002 [Solanum chilense]	------	------	------	------	------
gene_Solyc09g014350.3	Solyc09g014350.3	Glycerol-3-phosphate acyltransferase, expressed (AHRD V3.3 *** D8L9N9_WHEAT)	38.64	48.16	45.49	12.62	29.59	14.65	44.0967	18.9533	GO:0010143;GO:0009908;GO:0016021;GO:0016020;GO:0016791;GO:0090447;GO:001674	BP:cutin biosynthetic process;BP:flower development;CC:integral component of membrane;CC:membrane;MF:phosphatase activity;MF:glycerol-3-phosphate 2-O-acyltransferase activity;MF:transferase activity, transferring acyl groups;	K13508	GPAT	map00564;map00561	Glycerophospholipid metabolism;Glycerolipid metabolism	ENOG4110PXU	I:Lipid transport and metabolism	NP_001315360.1	glycerol-3-phosphate 2-O-acyltransferase 6 [Solanum lycopersicum]	sp|O80437|GPAT6_ARATH;	Glycerol-3-phosphate 2-O-acyltransferase 6 OS=Arabidopsis thaliana OX=3702 GN=GPAT6 PE=1 SV=1;	PF12710.9;PF01553.23	HAD;Acyltransferase	haloacid dehalogenase-like hydrolase;Acyltransferase
gene_Solyc09g055840.1	Solyc09g055840.1	NAD(P)H-quinone oxidoreductase subunit 2, chloroplastic (AHRD V3.3 *-* A0A2U9A0K7_9GENT)	11.25	19.34	15.7	5.45	0	0	15.43	1.81667	GO:0016021;GO:000950	CC:integral component of membrane;CC:chloroplast;	------	------	------	------	ENOG410YY0D;COG1009	C:Energy production and conversion;	GFQ08863.1	NAD(P)H-quinone oxidoreductase subunit 2 b chloroplastic [Phtheirospermum japonicum]	sp|P0CC34|NU2C1_ATRBE;	NA;	------	------	------
gene_Solyc09g055890.4	Solyc09g055890.4	Lipoxygenase (AHRD V3.3 *** A0A1S3YEP0_TOBAC)	1.56	0.53	1.39	0	0	0.21	1.16	0.07	GO:0006633;GO:0034440;GO:0031408;GO:0055114;GO:0016702;GO:004687	BP:fatty acid biosynthetic process;BP:lipid oxidation;BP:oxylipin biosynthetic process;BP:oxidation-reduction process;MF:oxidoreductase activity, acting on single donors with incorporation of molecular oxygen, incorporation of two atoms of oxygen;MF:metal ion binding;	K00454	LOX2S	map00591;map00592	Linoleic acid metabolism;alpha-Linolenic acid metabolism	ENOG410YATF	P:Inorganic ion transport and metabolism	XP_010326261.1	linoleate 9S-lipoxygenase-like [Solanum lycopersicum]	sp|P38416|LOXB_SOLLC;	Linoleate 9S-lipoxygenase B OS=Solanum lycopersicum OX=4081 GN=LOX1.2 PE=2 SV=1;	PF00305.21;PF01477.25	Lipoxygenase;PLAT	Lipoxygenase;PLAT/LH2 domain
gene_Solyc09g059970.3	Solyc09g059970.3	Small ubiquitin-related modifier (AHRD V3.3 *** A0A218VRF2_PUNGR)	348.73	310.25	363.56	184.32	176.38	160.97	340.847	173.89	GO:0016925;GO:0005737;GO:0005634;GO:0031386;GO:004438	BP:protein sumoylation;CC:cytoplasm;CC:nucleus;MF:protein tag;MF:ubiquitin-like protein ligase binding;	------	------	------	------	COG5227	O:Posttranslational modification, protein turnover, chaperones	NP_001234834.1	SUMO protein [Solanum lycopersicum]	sp|P55852|SUMO1_ARATH;	Small ubiquitin-related modifier 1 OS=Arabidopsis thaliana OX=3702 GN=SUMO1 PE=1 SV=2;	PF11976.10;PF00240.25	Rad60-SLD;ubiquitin	Ubiquitin-2 like Rad60 SUMO-like;Ubiquitin family
gene_Solyc09g061410.1	Solyc09g061410.1	CLAVATA3/ESR (CLE)-related protein 41-like (AHRD V3.3 --* XP_022856139.1)	31.41	23.75	25.38	23.68	14.82	17.62	26.8467	18.7067	GO:0010089;GO:0048046;GO:0016021;GO:003361	BP:xylem development;CC:apoplast;CC:integral component of membrane;MF:receptor serine/threonine kinase binding;	------	------	------	------	ENOG41115N3	S:Function unknown	TMX00149.1	hypothetical protein EJD97_001317 [Solanum chilense]	sp|A1EC31|TDIF_ZINVI;	CLAVATA3/ESR;	------	------	------
gene_Solyc09g064630.3	Solyc09g064630.3	Tetratricopeptide repeat (TPR)-like superfamily protein (AHRD V3.3 *-* F4K464_ARATH)	393.3	314.16	403.18	134.9	100.28	114.01	370.213	116.397	GO:000639	BP:RNA processing;	------	------	------	------	ENOG410YKFM	S:Function unknown	XP_004247137.1	uncharacterized protein LOC101248132 [Solanum lycopersicum]	------	------	PF13431.8;PF14559.8;PF13428.8	TPR_17;TPR_19;TPR_14	Tetratricopeptide repeat;Tetratricopeptide repeat;Tetratricopeptide repeat
gene_Solyc09g074910.1	Solyc09g074910.1	Peripheral-type benzodiazepine receptor (AHRD V3.3 *** Q6A151_SOLTU)	7	5.65	8.96	2.22	4.09	2.78	7.20333	3.03	GO:0009737;GO:0006778;GO:0009651;GO:0005795;GO:0005783;GO:0016021;GO:002003	BP:response to abscisic acid;BP:porphyrin-containing compound metabolic process;BP:response to salt stress;CC:Golgi stack;CC:endoplasmic reticulum;CC:integral component of membrane;MF:heme binding;	K05770	TSPO, BZRP	------	------	ENOG410YY8X	U:Intracellular trafficking, secretion, and vesicular transport	XP_004247434.1	translocator protein homolog [Solanum lycopersicum]	sp|O82245|TSPO_ARATH;	Translocator protein homolog OS=Arabidopsis thaliana OX=3702 GN=TSPO PE=1 SV=1;	PF03073.17	TspO_MBR	TspO/MBR family
gene_Solyc09g090360.3	Solyc09g090360.3	phosphate transporter PHO1-like (AHRD V3.3 *** A0A2I4DLD0_9ROSI)	3.15	1.61	2.05	0.8	0.31	0.76	2.27	0.623333	GO:0006817;GO:0016036;GO:0005737;GO:0005794;GO:0016021;GO:0005886;GO:0000822;GO:001511	BP:phosphate ion transport;BP:cellular response to phosphate starvation;CC:cytoplasm;CC:Golgi apparatus;CC:integral component of membrane;CC:plasma membrane;MF:inositol hexakisphosphate binding;MF:phosphate ion transmembrane transporter activity;	K24195	XPR1, PHO1	------	------	COG5409	T:Signal transduction mechanisms	XP_004247746.1	phosphate transporter PHO1 [Solanum lycopersicum]	sp|Q8S403|PHO1_ARATH;	Phosphate transporter PHO1 OS=Arabidopsis thaliana OX=3702 GN=PHO1 PE=1 SV=1;	PF03124.16;PF03105.21	EXS;SPX	EXS family;SPX domain
gene_Solyc09g090760.4	Solyc09g090760.4	Major facilitator superfamily protein (AHRD V3.3 *** A0A2U1PVI2_ARTAN)	0.52	0.66	0.53	0.22	0.14	0.17	0.57	0.176667	GO:0006817;GO:001602	BP:phosphate ion transport;CC:integral component of membrane;	------	------	------	------	ENOG410XRKZ	G:Carbohydrate transport and metabolism	TMW91099.1	hypothetical protein EJD97_014787 [Solanum chilense]	sp|F4I5Q2|FBT8_ARATH;	Probable folate-biopterin transporter 8, chloroplastic OS=Arabidopsis thaliana OX=3702 GN=At1g04570 PE=2 SV=1;	PF03092.18;PF07690.18	BT1;MFS_1	BT1 family;Major Facilitator Superfamily
gene_Solyc09g091580.3	Solyc09g091580.3	Protein kinase domain (AHRD V3.3 *** A0A200QUN4_9MAGN)	159.99	122.7	121.65	64.14	42.69	59.44	134.78	55.4233	GO:0009507;GO:0005524;GO:000467	CC:chloroplast;MF:ATP binding;MF:protein kinase activity;	K08869	ADCK, ABC1	------	------	COG0661	S:Function unknown	XP_004247833.1	uncharacterized protein LOC101257407 isoform X1 [Solanum lycopersicum]	sp|Q55680|Y005_SYNY3;	Uncharacterized protein sll0005 OS=Synechocystis sp.;	PF03109.18;PF01636.25	ABC1;APH	ABC1 atypical kinase-like domain;Phosphotransferase enzyme family
gene_Solyc09g097790.1	Solyc09g097790.1	Unknown protein	11.06	11.6	17.22	6.95	7.43	2.57	13.2933	5.65	------	------	------	------	------	------	------	------	XP_016566203.1	PREDICTED: glycine-rich protein-like [Capsicum annuum]	sp|P23137|GRP1_TOBAC;	Glycine-rich protein OS=Nicotiana tabacum OX=4097 GN=GRP PE=2 SV=1;	------	------	------
gene_Solyc10g005860.3	Solyc10g005860.3	WW domain-containing protein (AHRD V3.3 --* A0A2K3NUJ7_TRIPR)	7.23	10.99	4.48	2.07	2.87	3.68	7.56667	2.87333	------	------	K24774	FNBP4	------	------	ENOG410ZV0W;ENOG4111ZVS	S:Function unknown;	TMX01597.1	hypothetical protein EJD97_024204 [Solanum chilense]	------	------	------	------	------
gene_Solyc10g006920.3	Solyc10g006920.3	CBS domain (AHRD V3.3 *** A0A200QRX2_9MAGN)	2.1	2.7	2.38	0.56	1.1	0.46	2.39333	0.706667	GO:0006468;GO:0050790;GO:0042149;GO:0005737;GO:0005634;GO:0031588;GO:0019887;GO:0016208;GO:001990	BP:protein phosphorylation;BP:regulation of catalytic activity;BP:cellular response to glucose starvation;CC:cytoplasm;CC:nucleus;CC:nucleotide-activated protein kinase complex;MF:protein kinase regulator activity;MF:AMP binding;MF:protein kinase binding;	------	------	------	------	ENOG4111QFC	S:Function unknown	XP_004248503.1	CBS domain-containing protein CBSX5 [Solanum lycopersicum]	sp|Q84WQ5|CBSX5_ARATH;	CBS domain-containing protein CBSX5 OS=Arabidopsis thaliana OX=3702 GN=CBSX5 PE=2 SV=2;	PF00571.30	CBS	CBS domain
gene_Solyc10g051377.1	Solyc10g051377.1	RNA-binding protein (AHRD V3.3 *** O24106_NICGU)	1491.69	1455.64	1647.28	1267.81	993.92	886.15	1531.54	1049.29	GO:0005634;GO:0003723;GO:0003676;GO:000372	CC:nucleus;MF:RNA binding;MF:nucleic acid binding;MF:mRNA binding;	K13195	CIRBP	------	------	ENOG410XZHK	S:Function unknown	XP_015056192.1	glycine-rich RNA-binding protein GRP1A-like [Solanum pennellii]	sp|Q03878|GRP1_DAUCA;	Glycine-rich RNA-binding protein OS=Daucus carota OX=4039 PE=2 SV=1;	PF00076.24;PF16367.7	RRM_1;RRM_7	RNA recognition motif.;RNA recognition motif
gene_Solyc10g052490.2	Solyc10g052490.2	Isoflavone reductase homolog (AHRD V3.3 *** IFRH_SOLTU)	282.8	307.67	235.07	117.57	150.25	142.49	275.18	136.77	GO:0005737;GO:001649	CC:cytoplasm;MF:oxidoreductase activity;	K23050	PCBER1	------	------	ENOG411028Q;ENOG410Y0DY	S:Function unknown;	XP_004248713.1	isoflavone reductase homolog [Solanum lycopersicum]	sp|P52578|IFRH_SOLTU;	Isoflavone reductase homolog OS=Solanum tuberosum OX=4113 PE=2 SV=1;	PF05368.15;PF13460.8;PF01370.23;PF01073.21;PF03435.20;PF16363.7	NmrA;NAD_binding_10;Epimerase;3Beta_HSD;Sacchrp_dh_NADP;GDP_Man_Dehyd	NmrA-like family;NA;NAD dependent epimerase/dehydratase family;3-beta hydroxysteroid dehydrogenase/isomerase family;Saccharopine dehydrogenase NADP binding domain;GDP-mannose 4,6 dehydratase
gene_Solyc10g075107.1	Solyc10g075107.1	Non-specific lipid-transfer protein (AHRD V3.3 *** Q4A1N1_SOLLC)	13.84	8.47	12.64	2.98	6.43	3.57	11.65	4.32667	GO:0006869;GO:0016020;GO:000828	BP:lipid transport;CC:membrane;MF:lipid binding;	------	------	------	------	ENOG410YWBC	U:Intracellular trafficking, secretion, and vesicular transport	NP_001234735.1	non-specific lipid transfer protein precursor [Solanum lycopersicum]	sp|O24038|NLTP2_SOLPN;	Non-specific lipid-transfer protein 2 OS=Solanum pennellii OX=28526 GN=LTP2 PE=3 SV=1;	PF00234.24;PF14368.8	Tryp_alpha_amyl;LTP_2	Protease inhibitor/seed storage/LTP family;Probable lipid transfer
gene_Solyc10g078190.2	Solyc10g078190.2	cytosine-5 DNA methyltransferaseL1	19.96	14.03	13.61	6.65	6.9	6.45	15.8667	6.66667	GO:0006306;GO:000816	BP:DNA methylation;MF:methyltransferase activity;	------	------	------	------	ENOG410XQ4Y	L:Replication, recombination and repair	NP_001353597.1	DNA (cytosine-5)-methyltransferase [Solanum lycopersicum]	sp|Q9LXE5|DRM1L_ARATH;	DNA;	PF00145.19	DNA_methylase	C-5 cytosine-specific DNA methylase
gene_Solyc10g078500.1	Solyc10g078500.1	small basic intrinsic protein 1.3	6.38	4.71	1.97	0	0	0	4.35333	0	GO:0016021;GO:001525	CC:integral component of membrane;MF:water channel activity;	K09875	SIP	------	------	COG0580	G:Carbohydrate transport and metabolism	TMW91936.1	hypothetical protein EJD97_013716 [Solanum chilense]	sp|Q9ATM2|SIP12_MAIZE;	Aquaporin SIP1-2 OS=Zea mays OX=4577 GN=SIP1-2 PE=2 SV=1;	------	------	------
gene_Solyc10g079750.2	Solyc10g079750.2	BTB/POZ ankyrin repeat protein (AHRD V3.3 *** G3LSH3_LOTJA)	7.44	4.1	6.18	3.72	1.68	1.95	5.90667	2.45	GO:0099402;GO:0009864;GO:0005634;GO:000551	BP:plant organ development;BP:induced systemic resistance, jasmonic acid mediated signaling pathway;CC:nucleus;MF:protein binding;	K14508	NPR1	map04075	Plant hormone signal transduction	COG0666	S:Function unknown	XP_004249233.1	regulatory protein NPR5 [Solanum lycopersicum]	sp|Q9ZVC2|NPR5_ARATH;	Regulatory protein NPR5 OS=Arabidopsis thaliana OX=3702 GN=NPR5 PE=1 SV=1;	PF00651.33;PF11900.10;PF12796.9;PF00023.32;PF13857.8;PF13606.8;PF13637.8	BTB;DUF3420;Ank_2;Ank;Ank_5;Ank_3;Ank_4	BTB/POZ domain;Domain of unknown function;Ankyrin repeats;Ankyrin repeat;Ankyrin repeats;Ankyrin repeat;Ankyrin repeats
gene_Solyc10g085120.3	Solyc10g085120.3	Leucine-rich receptor-like kinase family protein (AHRD V3.3 *** G7KRB1_MEDTR)	2.1	2.13	2	0.67	0.94	0.84	2.07667	0.816667	GO:0006468;GO:0016021;GO:0005886;GO:0005524;GO:000467	BP:protein phosphorylation;CC:integral component of membrane;CC:plasma membrane;MF:ATP binding;MF:protein kinase activity;	------	------	------	------	COG4886	S:Function unknown	XP_004249819.1	putative receptor-like protein kinase At3g47110 [Solanum lycopersicum]	sp|C0LGP4|Y3475_ARATH;	Probable LRR receptor-like serine/threonine-protein kinase At3g47570 OS=Arabidopsis thaliana OX=3702 GN=At3g47570 PE=2 SV=1;	PF00069.27;PF07714.19;PF13855.8;PF12799.9;PF08263.14;PF03109.18	Pkinase;PK_Tyr_Ser-Thr;LRR_8;LRR_4;LRRNT_2;ABC1	Protein kinase domain;Protein tyrosine and serine/threonine kinase;Leucine rich repeat;Leucine Rich repeats;Leucine rich repeat N-terminal domain;ABC1 atypical kinase-like domain
gene_Solyc10g086250.2	Solyc10g086250.2	R2R3MYB transcription factor 75	117.06	90.03	93.54	56.96	20.44	36.64	100.21	38.0133	GO:000563	CC:nucleus;	K09422	MYBP	------	------	COG5147	K:Transcription	NP_001265992.1	transcription factor MYB75 [Solanum lycopersicum]	sp|Q9FNV9|MY113_ARATH;	Transcription factor MYB113 OS=Arabidopsis thaliana OX=3702 GN=MYB113 PE=1 SV=1;	PF00249.33;PF13921.8	Myb_DNA-binding;Myb_DNA-bind_6	Myb-like DNA-binding domain;Myb-like DNA-binding domain
gene_Solyc11g005310.1	Solyc11g005310.1	RING/U-box superfamily protein (AHRD V3.3 *** A0A2U1QK74_ARTAN)	4.27	2.89	2.06	0.65	0.36	1.03	3.07333	0.68	GO:0016567;GO:0016021;GO:001674	BP:protein ubiquitination;CC:integral component of membrane;MF:transferase activity;	K19040	ATL76S	------	------	ENOG41121N2	O:Posttranslational modification, protein turnover, chaperones	XP_004250442.2	RING-H2 finger protein ATL78-like [Solanum lycopersicum]	sp|Q6NQG7|ATL78_ARATH;	RING-H2 finger protein ATL78 OS=Arabidopsis thaliana OX=3702 GN=ATL78 PE=2 SV=1;	PF13639.8;PF17123.7;PF13923.8;PF12678.9;PF00097.27;PF12861.9;PF14634.8;PF13920.8;PF13445.8	zf-RING_2;zf-RING_11;zf-C3HC4_2;zf-rbx1;zf-C3HC4;zf-ANAPC11;zf-RING_5;zf-C3HC4_3;zf-RING_UBOX	Ring finger domain;RING-like zinc finger;Zinc finger, C3HC4 type;RING-H2 zinc finger domain;Zinc finger, C3HC4 type;Anaphase-promoting complex subunit 11 RING-H2 finger;zinc-RING finger domain;Zinc finger, C3HC4 type;RING-type zinc-finger
gene_Solyc11g012520.1	Solyc11g012520.1	hypothetical protein (AHRD V3.3 --* AT4G16447.1)	30.65	28.42	35.86	15.3	10.29	12.94	31.6433	12.8433	------	------	------	------	------	------	ENOG410Z1UZ	S:Function unknown	TMW92715.1	hypothetical protein EJD97_012657 [Solanum chilense]	------	------	------	------	------
gene_Solyc11g013060.1	Solyc11g013060.1	ALBINO3-like protein 2, chloroplastic (AHRD V3.3 *-* A0A1U8G0A5_CAPAN)	4.78	6.3	7.68	2.21	0.44	0.38	6.25333	1.01	GO:0016021;GO:003297	CC:integral component of membrane;MF:membrane insertase activity;	------	------	------	------	COG0706	U:Intracellular trafficking, secretion, and vesicular transport	TMW88350.1	hypothetical protein EJD97_018673 [Solanum chilense]	------	------	------	------	------
gene_Solyc11g013810.3	Solyc11g013810.3	Nitrate reductase (AHRD V3.3 *** Q8LT13_SOLTU)	74.28	48.03	56.91	22.49	10.07	16.54	59.74	16.3667	GO:0042128;GO:0055114;GO:0006809;GO:0005829;GO:0043546;GO:0050464;GO:0020037;GO:0009703;GO:0030151;GO:0071949;GO:001649	BP:nitrate assimilation;BP:oxidation-reduction process;BP:nitric oxide biosynthetic process;CC:cytosol;MF:molybdopterin cofactor binding;MF:nitrate reductas;MF:heme binding;MF:nitrate reductas;MF:molybdenum ion binding;MF:FAD binding;MF:oxidoreductase activity;	K10534	NR	map00910	Nitrogen metabolism	COG5274;COG5274	C:Energy production and conversion;I:Lipid transport and metabolism	NP_001315427.1	nitrate reductase [NADH] [Solanum lycopersicum]	sp|P17570|NIA_SOLLC;	Nitrate reductase [NADH] OS=Solanum lycopersicum OX=4081 GN=NIA PE=3 SV=1;	PF00174.21;PF03404.18;PF00970.26;PF00175.23;PF00173.30	Oxidored_molyb;Mo-co_dimer;FAD_binding_6;NAD_binding_1;Cyt-b5	Oxidoreductase molybdopterin binding domain;Mo-co oxidoreductase dimerisation domain;Oxidoreductase FAD-binding domain;Oxidoreductase NAD-binding domain;Cytochrome b5-like Heme/Steroid binding domain
gene_Solyc11g044230.3	Solyc11g044230.3	Costars family protein (AHRD V3.3 *-* A0A1U8F9R1_CAPAN)	133.2	134.86	149.91	71.27	97.01	63.66	139.323	77.3133	GO:003297	BP:regulation of actin filament-based process;	------	------	------	------	ENOG410XR7V	S:Function unknown	TMX05265.1	hypothetical protein EJD97_025435 [Solanum chilense]	sp|A2XKU9|COSA_ORYSI;	Costars family protein OS=Oryza sativa subsp. indica OX=39946 GN=OsI_012692 PE=3 SV=1;	PF14705.8	Costars	Costars
gene_Solyc11g044660.1	Solyc11g044660.1	ATP synthase subunit beta, chloroplastic (AHRD V3.3 *-* A0A2U1KL25_ARTAN)	6.81	7.2	2.37	0	1.02	1.96	5.46	0.993333	------	------	K02704	psbB	map00195	Photosynthesis	ENOG411184N	S:Function unknown	PHT25431.1	hypothetical protein CQW23_34938 [Capsicum baccatum]	------	------	------	------	------
gene_Solyc11g066430.3	Solyc11g066430.3	Histone H2B (AHRD V3.11 *** tr|A0A2G2ZDI9|A0A2G2ZDI9_CAPAN)	104.59	112.28	180.66	44.55	92.98	37.76	132.51	58.43	GO:0006334;GO:0000786;GO:0005634;GO:0046982;GO:000367	BP:nucleosome assembly;CC:nucleosome;CC:nucleus;MF:protein heterodimerization activity;MF:DNA binding;	K11252	H2B	------	------	ENOG4111NV5	B:Chromatin structure and dynamics	XP_015058212.1	histone H2B.2 [Solanum pennellii]	sp|O65818|H2B2_SOLLC;	Histone H2B.2 OS=Solanum lycopersicum OX=4081 GN=H2B-2 PE=2 SV=2;	PF00125.26;PF00808.25	Histone;CBFD_NFYB_HMF	Core histone H2A/H2B/H3/H4;Histone-like transcription factor
gene_Solyc11g066490.1	Solyc11g066490.1	Late embryogenesis abundant (LEA) hydroxyproline-rich glycoprotein family (AHRD V3.3 *** A0A2U1PPK6_ARTAN)	47.76	46.27	27.88	17.87	24.25	19.59	40.6367	20.57	GO:0046658;GO:0016021;GO:000950	CC:anchored component of plasma membrane;CC:integral component of membrane;CC:plasmodesma;	------	------	------	------	ENOG410YPRU	S:Function unknown	KAG5577876.1	hypothetical protein H5410_058010 [Solanum commersonii]	sp|Q8VZ13|Y1816_ARATH;	Uncharacterized protein At1g08160 OS=Arabidopsis thaliana OX=3702 GN=At1g08160 PE=2 SV=1;	PF03168.15	LEA_2	Late embryogenesis abundant protein
gene_Solyc11g066950.2	Solyc11g066950.2	Stress responsive A/B barrel domain-containing protein (AHRD V3.3 *** A0A2K3N653_TRIPR)	17.29	16.28	25.15	11.09	7.27	7.95	19.5733	8.77	------	------	------	------	------	------	ENOG410YNSU	S:Function unknown	XP_004251022.1	stress-response A/B barrel domain-containing protein At5g22580 [Solanum lycopersicum]	sp|Q9FK81|Y5258_ARATH;	Stress-response A/B barrel domain-containing protein At5g22580 OS=Arabidopsis thaliana OX=3702 GN=At5g22580 PE=1 SV=1;	PF07876.14	Dabb	Stress responsive A/B Barrel Domain
gene_Solyc11g069700.2	Solyc11g069700.2	Elongation factor 1-alpha (AHRD V3.3 *** A0A1U8EL12_CAPAN)	64.2	65.79	51.34	39.57	10.57	21.76	60.4433	23.9667	GO:0006414;GO:0006412;GO:0005737;GO:0003924;GO:0003746;GO:000552	BP:translational elongation;BP:translation;CC:cytoplasm;MF:GTPase activity;MF:translation elongation factor activity;MF:GTP binding;	K03231	EEF1A	map03013	Nucleocytoplasmic transport	COG5256	J:Translation, ribosomal structure and biogenesis	XP_004251154.1	elongation factor 1-alpha [Solanum lycopersicum]	sp|P17786|EF1A_SOLLC;	Elongation factor 1-alpha OS=Solanum lycopersicum OX=4081 PE=2 SV=1;	PF00009.29;PF03143.19;PF03144.27;PF01926.25	GTP_EFTU;GTP_EFTU_D3;GTP_EFTU_D2;MMR_HSR1	Elongation factor Tu GTP binding domain;Elongation factor Tu C-terminal domain;Elongation factor Tu domain 2;50S ribosome-binding GTPase
gene_Solyc11g071740.2	Solyc11g071740.2	Calcium-binding protein CML38 (AHRD V3.3 *** A0A2G3BAR0_CAPCH)	27.81	14.6	6.63	4.51	3.47	2.51	16.3467	3.49667	GO:000550	MF:calcium ion binding;	K13448	CML	map04626	Plant-pathogen interaction	COG5126;COG5126;COG5126	D:Cell cycle control, cell division, chromosome partitioning;T:Signal transduction mechanisms;Z:Cytoskeleton	XP_004251211.1	putative calcium-binding protein CML19 [Solanum lycopersicum]	sp|Q9SRE6|CML38_ARATH;	Calcium-binding protein CML38 OS=Arabidopsis thaliana OX=3702 GN=CML38 PE=1 SV=1;	PF13833.8;PF00036.34;PF13499.8;PF13405.8;PF13202.8	EF-hand_8;EF-hand_1;EF-hand_7;EF-hand_6;EF-hand_5	EF-hand domain pair;EF hand;EF-hand domain pair;EF-hand domain;EF hand
gene_Solyc12g006380.2	Solyc12g006380.2	2-oxoglutarate-dependent dioxygenase	37.75	34.32	43.39	20.5	6.96	10.67	38.4867	12.71	GO:0055114;GO:0031418;GO:0046872;GO:0051213;GO:001649	BP:oxidation-reduction process;MF:L-ascorbic acid binding;MF:metal ion binding;MF:dioxygenase activity;MF:oxidoreductase activity;	------	------	------	------	COG3491	S:Function unknown	NP_001234624.1	2-oxoglutarate-dependent dioxygenase [Solanum lycopersicum]	sp|P10967|ACCH3_SOLLC;	1-aminocyclopropane-1-carboxylate oxidase homolog OS=Solanum lycopersicum OX=4081 GN=ACO3 PE=2 SV=1;	PF03171.22;PF14226.8	2OG-FeII_Oxy;DIOX_N	2OG-F;non-haem dioxygenase in morphine synthesis N-terminal
gene_Solyc12g006890.2	Solyc12g006890.2	Unknown protein	6.51	4.58	10.7	1.86	2.77	3.23	7.26333	2.62	GO:0016579;GO:0070646;GO:0008233;GO:010100	BP:protein deubiquitination;BP:protein modification by small protein removal;MF:peptidase activity;MF:ubiquitinyl hydrolase activity;	------	------	------	------	ENOG4111H3Z	S:Function unknown	XP_010313710.1	deSI-like protein At4g17486 isoform X2 [Solanum lycopersicum]	sp|Q93VG8|PPDEX_ARATH;	DeSI-like protein At4g17486 OS=Arabidopsis thaliana OX=3702 GN=At4g17486 PE=2 SV=1;	------	------	------
gene_Solyc12g007160.2	Solyc12g007160.2	ABI family (AHRD V3.3 *** A0A2U1KK95_ARTAN)	3.69	4.94	9.84	1.73	2.66	1.27	6.15667	1.88667	------	------	------	------	------	------	ENOG410YZ7R	S:Function unknown	XP_004252057.2	probable protein ABIL5 [Solanum lycopersicum]	sp|Q5JMF2|ABIL5_ORYSJ;	Probable protein ABIL5 OS=Oryza sativa subsp. japonica OX=39947 GN=Os01g0760900 PE=2 SV=1;	------	------	------
gene_Solyc12g009270.1	Solyc12g009270.1	Plant invertase/pectin methylesterase inhibitor superfamily protein (AHRD V3.3 *** A0A061GSW0_THECC)	22.32	20.45	14.05	7.4	5.24	5.1	18.94	5.91333	GO:0043086;GO:0005576;GO:0016787;GO:000485	BP:negative regulation of catalytic activity;CC:extracellular region;MF:hydrolase activity;MF:enzyme inhibitor activity;	------	------	------	------	ENOG41116AN	S:Function unknown	XP_004251705.1	pectinesterase inhibitor 3 [Solanum lycopersicum]	sp|Q84WE4|PMEI3_ARATH;	Pectinesterase inhibitor 3 OS=Arabidopsis thaliana OX=3702 GN=PMEI3 PE=2 SV=1;	PF04043.17	PMEI	Plant invertase/pectin methylesterase inhibitor
gene_Solyc12g009380.2	Solyc12g009380.2	30S ribosomal protein S17 (AHRD V3.3 *** A0A2G3BP35_CAPCH)	63.45	59.5	70.16	50.43	52.86	51.11	64.37	51.4667	GO:0006412;GO:0005840;GO:0005622;GO:0003735;GO:001984	BP:translation;CC:ribosome;CC:intracellular;MF:structural constituent of ribosome;MF:rRNA binding;	K02961	RP-S17, MRPS17, rpsQ	map03010	Ribosome	COG0186	J:Translation, ribosomal structure and biogenesis	XP_004251712.1	uncharacterized protein LOC101256066 [Solanum lycopersicum]	sp|B1I1J7|RS17_DESAP;	30S ribosomal protein S17 OS=Desulforudis audaxviator;	PF00366.22	Ribosomal_S17	Ribosomal protein S17
gene_Solyc12g010595.2	Solyc12g010595.2	transcription factor bHLH36-like (AHRD V3.11 *** tr|A0A2I4FJG0|A0A2I4FJG0_9ROSI)	0.39	0.91	0.36	0	0	0	0.553333	0	GO:0006357;GO:0005634;GO:0003700;GO:004698	BP:regulation of transcription from RNA polymerase II promoter;CC:nucleus;MF:transcription factor activity, sequence-specific DNA binding;MF:protein dimerization activity;	------	------	------	------	ENOG41119GS;ENOG4111D1R	K:Transcription;S:Function unknown	XP_019067021.2	transcription factor bHLH162-like [Solanum lycopersicum]	sp|F4JIJ7|BH162_ARATH;	Transcription factor bHLH162 OS=Arabidopsis thaliana OX=3702 GN=BHLH162 PE=1 SV=1;	PF00010.28	HLH	Helix-loop-helix DNA-binding domain
gene_Solyc12g013510.1	Solyc12g013510.1	Histone H2B (AHRD V3.3 *** A0A328DBY2_9ASTE)	12.04	14.31	13.95	10.36	6.8	7.37	13.4333	8.17667	GO:0006334;GO:0000786;GO:0005634;GO:0046982;GO:000367	BP:nucleosome assembly;CC:nucleosome;CC:nucleus;MF:protein heterodimerization activity;MF:DNA binding;	K11252	H2B	------	------	ENOG4111NV5	B:Chromatin structure and dynamics	XP_004251842.1	histone H2B-like isoform X1 [Solanum lycopersicum]	sp|Q1S9I9|H2B1_MEDTR;	Probable histone H2B.1 OS=Medicago truncatula OX=3880 PE=3 SV=3;	PF00125.26;PF00808.25	Histone;CBFD_NFYB_HMF	Core histone H2A/H2B/H3/H4;Histone-like transcription factor
gene_Solyc12g049350.2	Solyc12g049350.2	R2R3MYB transcription factor 11	12.91	12.77	9.68	3.1	3.85	1.57	11.7867	2.84	GO:0007155;GO:0005634;GO:000588	BP:cell adhesion;CC:nucleus;CC:plasma membrane;	K09422	MYBP	------	------	COG5147	K:Transcription	XP_004252405.1	transcription factor MYB12-like isoform X2 [Solanum lycopersicum]	sp|O22264|MYB12_ARATH;	Transcription factor MYB12 OS=Arabidopsis thaliana OX=3702 GN=MYB12 PE=1 SV=1;	PF00249.33;PF13921.8	Myb_DNA-binding;Myb_DNA-bind_6	Myb-like DNA-binding domain;Myb-like DNA-binding domain
gene_Solyc12g056200.2	Solyc12g056200.2	DUF604 domain-containing protein (AHRD V3.3 *** A0A1Q3C751_CEPFO)	8	8.88	7.12	3.56	4.76	2.09	8	3.47	GO:0016021;GO:000837	CC:integral component of membrane;MF:acetylglucosaminyltransferase activity;	------	------	------	------	ENOG410YRJG	S:Function unknown	XP_004252583.1	uncharacterized protein LOC101263884 [Solanum lycopersicum]	------	------	PF04646.14;PF02434.18	DUF604;Fringe	Protein of unknown function, DUF604;Fringe-like
gene_Solyc12g056860.2	Solyc12g056860.2	Transcription factor TGA7 (AHRD V3.3 *** A0A1U8F8B9_CAPAN)	40.55	33.44	39.29	23.69	10.35	15.47	37.76	16.5033	GO:0006351;GO:0003700;GO:004356	BP:transcription, DNA-templated;MF:transcription factor activity, sequence-specific DNA binding;MF:sequence-specific DNA binding;	K14431	TGA	map04075	Plant hormone signal transduction	ENOG410YEGW	K:Transcription	XP_004252551.1	transcription factor TGA1 [Solanum lycopersicum]	sp|Q39237|TGA1_ARATH;	Transcription factor TGA1 OS=Arabidopsis thaliana OX=3702 GN=TGA1 PE=1 SV=2;	PF14144.8;PF00170.23;PF07716.17	DOG1;bZIP_1;bZIP_2	Seed dormancy control;bZIP transcription factor;Basic region leucine zipper
gene_Solyc12g096030.1	Solyc12g096030.1	Mitochondrial carrier protein (AHRD V3.3 *** F8WLA3_CITUN)	5.68	7.28	9.39	2.58	2.13	2.33	7.45	2.34667	GO:0055085;GO:001602	BP:transmembrane transport;CC:integral component of membrane;	K15121	SLC25A44	------	------	ENOG410XTGQ	S:Function unknown	XP_004253090.1	solute carrier family 25 member 44-like [Solanum lycopersicum]	sp|Q5RD67|S2544_PONAB;	Solute carrier family 25 member 44 OS=Pongo abelii OX=9601 GN=SLC25A44 PE=2 SV=2;	PF00153.29	Mito_carr	Mitochondrial carrier protein
gene_Solyc12g099900.1	Solyc12g099900.1	SCL3 (scarecrow-like 3)	29.95	28.05	26.95	15.88	10.82	12.08	28.3167	12.9267	GO:0009739;GO:0006355;GO:0005634;GO:0003700;GO:004356	BP:response to gibberellin;BP:regulation of transcription, DNA-templated;CC:nucleus;MF:transcription factor activity, sequence-specific DNA binding;MF:sequence-specific DNA binding;	------	------	------	------	ENOG410XRSH	K:Transcription	XP_004252879.1	scarecrow-like protein 3 [Solanum lycopersicum]	sp|Q9LPR8|SCL3_ARATH;	Scarecrow-like protein 3 OS=Arabidopsis thaliana OX=3702 GN=SCL3 PE=1 SV=1;	PF03514.16	GRAS	GRAS domain family

## Sheet: Pb_vs_Control_cluster1
Supplementary Dataset 1c. Gene co-expression clusters of DEGs in Pd vs. Control group of tomato seedlings.
Gene_id	Gene_name	Gene_description	Control_1	Control_2	Control_3	Pb_1	Pb_2	Pb_3	Control	Pb	GO_id	GO_term	KO_id	KO_name	Pathway_id	Pathway_definition	COG_id	COG_Functional Categories	NR_hit-name	NR_description	Swiss-Prot_hit-name	Swiss-Prot_description	Pfam_id	Domain	Domain description
gene_Solyc00g500353.1	Solyc00g500353.1	Phenylalanine ammonia-lyase (AHRD V3.3 *** A0A2G2VZP0_CAPBA)	0.05	0.04	0.12	8.33	6.15	12.76	0.07	9.08	GO:0006559;GO:0009800;GO:0005737;GO:0032991;GO:0045548;GO:001684	BP:L-phenylalanine catabolic process;BP:cinnamic acid biosynthetic process;CC:cytoplasm;CC:macromolecular complex;MF:phenylalanine ammonia-lyase activity;MF:ammonia-lyase activity;	K10775	PAL	map00940;map00360	Phenylpropanoid biosynthesis;Phenylalanine metabolism	COG2986	E:Amino acid transport and metabolism	XP_025885606.1	LOW QUALITY PROTEIN: phenylalanine ammonia-lyase-like [Solanum lycopersicum]	sp|P35511|PAL1_SOLLC;	Phenylalanine ammonia-lyase OS=Solanum lycopersicum OX=4081 GN=PAL PE=2 SV=1;	PF00221.21	Lyase_aromatic	Aromatic amino acid lyase
gene_Solyc01g005160.5	Solyc01g005160.5	RING-type E3 ubiquitin transferase (AHRD V3.11 *** tr|Q1WM08|Q1WM08_SOLLC)	0.51	0.15	0.17	0.9	2.4	1.01	0.276667	1.43667	GO:000484	MF:ubiquitin-protein transferase activity;	------	------	------	------	ENOG410Y3P9	O:Posttranslational modification, protein turnover, chaperones	NP_001234240.1	Avr9/Cf-9 rapidly elicited protein [Solanum lycopersicum]	sp|Q5PNY6|PUB21_ARATH;	U-box domain-containing protein 21 OS=Arabidopsis thaliana OX=3702 GN=PUB21 PE=2 SV=1;	PF04564.17;PF11789.10	U-box;zf-Nse	U-box domain;Zinc-finger of the MIZ type in Nse subunit
gene_Solyc01g007980.4	Solyc01g007980.4	Cysteine-rich receptor-like protein kinase 2 (AHRD V3.3 *** A0A2G2YVX5_CAPAN)	14.59	11.12	10.64	20.88	28.31	23.16	12.1167	24.1167	GO:0006468;GO:0016021;GO:0005524;GO:000467	BP:protein phosphorylation;CC:integral component of membrane;MF:ATP binding;MF:protein kinase activity;	------	------	------	------	COG0515	T:Signal transduction mechanisms	XP_027769909.1	cysteine-rich receptor-like protein kinase 2 isoform X1 [Solanum pennellii]	sp|Q9CAL3|CRK2_ARATH;	Cysteine-rich receptor-like protein kinase 2 OS=Arabidopsis thaliana OX=3702 GN=CRK2 PE=1 SV=1;	PF07714.19;PF00069.27;PF01657.19;PF03109.18	PK_Tyr_Ser-Thr;Pkinase;Stress-antifung;ABC1	Protein tyrosine and serine/threonine kinase;Protein kinase domain;Salt stress response/antifungal;ABC1 atypical kinase-like domain
gene_Solyc01g066730.4	Solyc01g066730.4	Transcription factor, MADS-box (AHRD V3.3 *-* A0A2U1LSQ9_ARTAN)	2	2.83	2.06	4.62	4.19	4.74	2.29667	4.51667	GO:0006357;GO:0005634;GO:0003677;GO:0000978;GO:0046983;GO:000098	BP:regulation of transcription from RNA polymerase II promoter;CC:nucleus;MF:DNA binding;MF:RNA polymerase II core promoter proximal region sequence-specific DNA binding;MF:protein dimerization activity;MF:RNA polymerase II transcription factor activity, sequence-specific DNA binding;	K12412	MCM1	------	------	ENOG410XS0C	S:Function unknown	XP_025886320.1	agamous-like MADS-box protein AGL97 [Solanum lycopersicum]	sp|Q9S7Q7|FLC_ARATH;	MADS-box protein FLOWERING LOCUS C OS=Arabidopsis thaliana OX=3702 GN=FLC PE=1 SV=1;	PF00319.20	SRF-TF	SRF-type transcription factor
gene_Solyc01g086730.4	Solyc01g086730.4	magnesium transporter%2C putative (DUF803) (AHRD V3.3 *** AT3G26670.4)	2.39	1.81	2.05	4.29	6.15	3.9	2.08333	4.78	GO:0015693;GO:0016021;GO:0005769;GO:0005886;GO:001509	BP:magnesium ion transport;CC:integral component of membrane;CC:early endosome;CC:plasma membrane;MF:magnesium ion transmembrane transporter activity;	K22733	NIPA, SLC57A2S	------	------	ENOG410XNR8	S:Function unknown	XP_004229598.1	probable magnesium transporter NIPA8 [Solanum lycopersicum]	sp|Q8RWF4|NIPA8_ARATH;	Probable magnesium transporter NIPA8 OS=Arabidopsis thaliana OX=3702 GN=At3g26670 PE=2 SV=1;	PF05653.16	Mg_trans_NIPA	Magnesium transporter NIPA
gene_Solyc01g091030.3	Solyc01g091030.3	Small auxin up-regulated RNA1	18.89	19.41	15.69	30.32	49.61	36.77	17.9967	38.9	GO:000973	BP:response to auxin;	K14488	SAUR	map04075	Plant hormone signal transduction	ENOG410YVYP	S:Function unknown	XP_004229795.1	auxin-induced protein 10A5 [Solanum lycopersicum]	sp|O22150|SAU36_ARATH;	Auxin-responsive protein SAUR36 OS=Arabidopsis thaliana OX=3702 GN=SAUR36 PE=2 SV=1;	PF02519.16	Auxin_inducible	Auxin responsive protein
gene_Solyc01g094140.3	Solyc01g094140.3	Cytochrome P450 (AHRD V3.3 *** A0A200PMQ0_9MAGN)	0.2	0.16	0.23	0.64	0.54	0.97	0.196667	0.716667	GO:0055114;GO:0016021;GO:0004497;GO:0020037;GO:0016705;GO:000550	BP:oxidation-reduction process;CC:integral component of membrane;MF:monooxygenase activity;MF:heme binding;MF:oxidoreductase activity, acting on paired donors, with incorporation or reduction of molecular oxygen;MF:iron ion binding;	------	------	------	------	COG2124	Q:Secondary metabolites biosynthesis, transport and catabolism	TMW94025.1	hypothetical protein EJD97_010868 [Solanum chilense]	sp|Q50EK3|C04C1_PINTA;	Cytochrome P450 704C1 OS=Pinus taeda OX=3352 GN=CYP704C1 PE=2 SV=1;	PF00067.24	p450	Cytochrome P450
gene_Solyc01g094210.2	Solyc01g094210.2	NAD(P)-binding Rossmann-fold superfamily protein (AHRD V3.3 *** A0A2U1PI64_ARTAN)	2.16	2.08	5.42	5.58	15.06	7.38	3.22	9.34	GO:0016020;GO:001649	CC:membrane;MF:oxidoreductase activity;	K15095	E1.1.1.208	map00902	Monoterpenoid biosynthesis	COG1028;ENOG4112CXC	S:Function unknown;	XP_019071541.1	(+)-neomenthol dehydrogenase [Solanum lycopersicum]	sp|Q9M2E2|SDR1_ARATH;	;	PF00106.27;PF13561.8;PF08659.12;PF01370.23	adh_short;adh_short_C2;KR;Epimerase	short chain dehydrogenase;Enoyl;KR domain;NAD dependent epimerase/dehydratase family
gene_Solyc01g096400.5	Solyc01g096400.5	Transglut_core2 domain-containing protein (AHRD V3.11 *** tr|A0A1Q3C505|A0A1Q3C505_CEPFO)	28.92	24.42	23.87	34.76	50.79	49.79	25.7367	45.1133	------	------	------	------	------	------	ENOG4111G2A	S:Function unknown	XP_004230025.1	uncharacterized protein LOC101265170 isoform X1 [Solanum lycopersicum]	------	------	PF13369.8;PF13371.8	Transglut_core2;TPR_9	Transglutaminase-like superfamily;Tetratricopeptide repeat
gene_Solyc01g102740.3	Solyc01g102740.3	NAC domain (AHRD V3.3 *-* A0A200PZR6_9MAGN)	16.23	17.83	17.73	34.1	45.07	30.33	17.2633	36.5	GO:0006355;GO:000367	BP:regulation of transcription, DNA-templated;MF:DNA binding;	------	------	------	------	ENOG410YIMX	S:Function unknown	XP_004230395.1	NAC domain-containing protein 35 isoform X2 [Solanum lycopersicum]	sp|Q9ZVP8|NAC35_ARATH;	NAC domain-containing protein 35 OS=Arabidopsis thaliana OX=3702 GN=NAC035 PE=1 SV=2;	PF02365.17	NAM	No apical meristem
gene_Solyc01g102850.3	Solyc01g102850.3	Disease resistance protein (TIR-NBS-LRR class) family (AHRD V3.3 *** F4K5U7_ARATH)	0.57	0.28	0.37	1.17	1.27	1.12	0.406667	1.18667	GO:0006952;GO:0007165;GO:0016787;GO:004353	BP:defense response;BP:signal transduction;MF:hydrolase activity;MF:ADP binding;	------	------	------	------	ENOG4112BMQ	S:Function unknown	XP_025884749.1	uncharacterized protein LOC101251930 [Solanum lycopersicum]	sp|Q40392|TMVRN_NICGU;	TMV resistance protein N OS=Nicotiana glutinosa OX=35889 GN=N PE=1 SV=1;	PF00931.24;PF01582.22;PF13855.8;PF13676.8;PF05729.14;PF13401.8	NB-ARC;TIR;LRR_8;TIR_2;NACHT;AAA_22	NB-ARC domain;TIR domain;Leucine rich repeat;TIR domain;NACHT domain;AAA domain
gene_Solyc01g107460.3	Solyc01g107460.3	Neuronal PAS domain protein (AHRD V3.11 *** tr|A0A1P8BBZ0|A0A1P8BBZ0_ARATH)	16.1	14.12	24.51	39.61	68.9	46.09	18.2433	51.5333	------	------	------	------	------	------	ENOG410YB32	S:Function unknown	XP_004230726.1	uncharacterized protein LOC101248432 [Solanum lycopersicum]	------	------	------	------	------
gene_Solyc01g108440.3	Solyc01g108440.3	Herbivore elicitor-regulated 1 (AHRD V3.11 *** tr|S5ZR43|S5ZR43_NICAT)	1.68	1.49	1.72	3.28	4.96	2.99	1.63	3.74333	GO:000588	CC:plasma membrane;	------	------	------	------	ENOG410YKJ8	S:Function unknown	XP_010315267.1	uncharacterized protein DDB_G0271670-like [Solanum lycopersicum]	------	------	PF07816.13	DUF1645	Protein of unknown function
gene_Solyc01g111610.3	Solyc01g111610.3	SBP (S-ribonuclease binding protein) family protein (AHRD V3.3 *** A0A2U1N6W4_ARTAN)	5.8	4.71	5.16	8.71	13.97	8.62	5.22333	10.4333	GO:0046872;GO:000484	MF:metal ion binding;MF:ubiquitin-protein transferase activity;	K19042	BOI	------	------	ENOG4111S1X	S:Function unknown	XP_004231045.1	probable BOI-related E3 ubiquitin-protein ligase 3 [Solanum lycopersicum]	sp|Q9FHE4|BRG1_ARATH;	BOI-related E3 ubiquitin-protein ligase 1 OS=Arabidopsis thaliana OX=3702 GN=BRG1 PE=1 SV=1;	PF13920.8	zf-C3HC4_3	Zinc finger, C3HC4 type
gene_Solyc02g065190.3	Solyc02g065190.3	Cytochrome P450 (AHRD V3.3 *** A0A1U9X5Y9_THAGA)	1.1	1.7	1.6	2.07	4.82	2.44	1.46667	3.11	GO:0055114;GO:0016021;GO:0004497;GO:0020037;GO:0016705;GO:000550	BP:oxidation-reduction process;CC:integral component of membrane;MF:monooxygenase activity;MF:heme binding;MF:oxidoreductase activity, acting on paired donors, with incorporation or reduction of molecular oxygen;MF:iron ion binding;	------	------	------	------	COG2124	Q:Secondary metabolites biosynthesis, transport and catabolism	XP_004233427.1	geraniol 8-hydroxylase [Solanum lycopersicum]	sp|Q8VWZ7|C76B6_CATRO;	Geraniol 8-hydroxylase OS=Catharanthus roseus OX=4058 GN=CYP76B6 PE=1 SV=1;	PF00067.24	p450	Cytochrome P450
gene_Solyc02g071380.2	Solyc02g071380.2	2-oxoglutarate (2OG) and Fe(II)-dependent oxygenase superfamily protein (AHRD V3.3 *** F4I629_ARATH)	16.9	14.75	15.98	34.8	43.89	32.79	15.8767	37.16	GO:0055114;GO:0031418;GO:0046872;GO:0051213;GO:001649	BP:oxidation-reduction process;MF:L-ascorbic acid binding;MF:metal ion binding;MF:dioxygenase activity;MF:oxidoreductase activity;	------	------	------	------	COG3491	S:Function unknown	XP_004233006.1	protein SRG1 [Solanum lycopersicum]	sp|Q39224|SRG1_ARATH;	Protein SRG1 OS=Arabidopsis thaliana OX=3702 GN=SRG1 PE=2 SV=1;	PF03171.22;PF14226.8	2OG-FeII_Oxy;DIOX_N	2OG-F;non-haem dioxygenase in morphine synthesis N-terminal
gene_Solyc02g079360.3	Solyc02g079360.3	Phox/Bem1p (AHRD V3.3 *** A0A200Q8I8_9MAGN)	20.89	21.01	25.01	42.4	66.63	40.66	22.3033	49.8967	GO:0046777;GO:0004674;GO:000551	BP:protein autophosphorylation;MF:protein serine/threonine kinase activity;MF:protein binding;	------	------	------	------	ENOG410YH0S	S:Function unknown	XP_004232780.1	uncharacterized protein LOC101248446 [Solanum lycopersicum]	------	------	PF00564.26	PB1	PB1 domain
gene_Solyc02g079550.3	Solyc02g079550.3	G-type lectin S-receptor-like serine/threonine-protein kinase (AHRD V3.3 *** A0A2G3D6E9_CAPCH)	6.55	6.17	6.36	11.37	16.87	8.87	6.36	12.37	GO:0006468;GO:0048544;GO:0016021;GO:0030246;GO:0106311;GO:0008270;GO:0004672;GO:0106310;GO:000552	BP:protein phosphorylation;BP:recognition of pollen;CC:integral component of membrane;MF:carbohydrate binding;MF:old GO;MF:zinc ion binding;MF:protein kinase activity;MF:old GO;MF:ATP binding;	------	------	------	------	COG0515;ENOG4110XTI	T:Signal transduction mechanisms;	XP_019067884.2	uncharacterized protein LOC101264093 [Solanum lycopersicum]	sp|Q9SXB4|Y1130_ARATH;	G-type lectin S-receptor-like serine/threonine-protein kinase At1g11300 OS=Arabidopsis thaliana OX=3702 GN=At1g11300 PE=2 SV=1;	PF01453.26;PF00069.27;PF00954.22;PF07714.19;PF08276.13	B_lectin;Pkinase;S_locus_glycop;PK_Tyr_Ser-Thr;PAN_2	D-mannose binding lectin;Protein kinase domain;S-locus glycoprotein domain;Protein tyrosine and serine/threonine kinase;PAN-like domain
gene_Solyc02g079580.4	Solyc02g079580.4	S-receptor kinase-like protein.1	1.87	2.54	1.59	3.52	4.5	3.92	2	3.98	GO:0006468;GO:0048544;GO:0016021;GO:0005886;GO:0106310;GO:0106311;GO:0004672;GO:0030246;GO:0004674;GO:000552	BP:protein phosphorylation;BP:recognition of pollen;CC:integral component of membrane;CC:plasma membrane;CC:old GO;CC:old GO;MF:protein kinase activity;MF:carbohydrate binding;MF:protein serine/threonine kinase activity;MF:ATP binding;	------	------	------	------	COG0515	T:Signal transduction mechanisms	XP_019067883.1	G-type lectin S-receptor-like serine/threonine-protein kinase At1g11330 isoform X3 [Solanum lycopersicum]	sp|O64770|Y1649_ARATH;	G-type lectin S-receptor-like serine/threonine-protein kinase At1g61490 OS=Arabidopsis thaliana OX=3702 GN=At1g61490 PE=3 SV=1;	PF07714.19;PF00069.27;PF11883.10	PK_Tyr_Ser-Thr;Pkinase;DUF3403	Protein tyrosine and serine/threonine kinase;Protein kinase domain;Domain of unknown function
gene_Solyc02g081390.3	Solyc02g081390.3	Lysine-specific histone demethylase.1	43.27	35.22	33.38	61.34	84.66	64.7	37.29	70.2333	GO:0006598;GO:0055114;GO:0005777;GO:0046592;GO:001649	BP:polyamine catabolic process;BP:oxidation-reduction process;CC:peroxisome;MF:polyamine oxidase activity;MF:oxidoreductase activity;	K17839	PAO4, PAO3, PAO2	map00330;map00770;map00410	Arginine and proline metabolism;Pantothenate and CoA biosynthesis;beta-Alanine metabolism	ENOG410XSNC	S:Function unknown	XP_004232664.1	probable polyamine oxidase 4 [Solanum lycopersicum]	sp|Q8H191|PAO4_ARATH;	Probable polyamine oxidase 4 OS=Arabidopsis thaliana OX=3702 GN=PAO4 PE=1 SV=1;	PF01593.26;PF13450.8;PF07992.16;PF01266.26;PF00890.26;PF12831.9;PF00070.29;PF03486.16;PF01946.19	Amino_oxidase;NAD_binding_8;Pyr_redox_2;DAO;FAD_binding_2;FAD_oxidored;Pyr_redox;HI0933_like;Thi4	Flavin containing amine oxidoreductase;NA;Pyridine nucleotide-disulphide oxidoreductase;FAD dependent oxidoreductase;FAD binding domain;FAD dependent oxidoreductase;Pyridine nucleotide-disulphide oxidoreductase;HI0933-like protein;Thi4 family
gene_Solyc02g082550.3	Solyc02g082550.3	Protein kinase - like protein (AHRD V3.3 *** O81783_ARATH)	11.37	7.86	8.02	15.53	21.63	15.07	9.08333	17.41	GO:0006468;GO:0000245;GO:0050684;GO:0035556;GO:0005737;GO:0005634;GO:0004674;GO:0004672;GO:000552	BP:protein phosphorylation;BP:spliceosomal complex assembly;BP:regulation of mRNA processing;BP:intracellular signal transduction;CC:cytoplasm;CC:nucleus;MF:protein serine/threonine kinase activity;MF:protein kinase activity;MF:ATP binding;	K08832	SRPK3, STK23	------	------	ENOG410XRBH	T:Signal transduction mechanisms	TMX03170.1	hypothetical protein EJD97_017840 [Solanum chilense]	sp|Q45FA5|SRPK_PHYPO;	Serine/threonine-protein kinase SRPK OS=Physarum polycephalum OX=5791 PE=1 SV=1;	PF00069.27;PF07714.19	Pkinase;PK_Tyr_Ser-Thr	Protein kinase domain;Protein tyrosine and serine/threonine kinase
gene_Solyc02g085010.1	Solyc02g085010.1	hypothetical protein (AHRD V3.3 *-* AT2G18210.1)	21.51	22.82	14.33	54.27	87.67	59.81	19.5533	67.25	------	------	------	------	------	------	ENOG4111CB0;ENOG41113DY	S:Function unknown;	TMW98355.1	hypothetical protein EJD97_004166 [Solanum chilense]	------	------	------	------	------
gene_Solyc02g085720.1	Solyc02g085720.1	Geranylgeranyl pyrophosphate synthase, chloroplastic (AHRD V3.3 *** A0A2G2XGF3_CAPBA)	1.16	1.47	0.99	2.74	3.05	2.52	1.20667	2.77	GO:0008299;GO:0016740;GO:0004311;GO:0004161;GO:000465	BP:isoprenoid biosynthetic process;MF:transferase activity;MF:farnesyltranstransferase activity;MF:dimethylallyltranstransferase activity;MF:prenyltransferase activity;	K13789	GGPS	map00900	Terpenoid backbone biosynthesis	COG0142	H:Coenzyme transport and metabolism	XP_019067954.1	geranylgeranyl pyrophosphate synthase, chloroplastic-like [Solanum lycopersicum]	sp|A0A0U3BRC5|GFDPS_LEUCN;	Geranylfarnesyl diphosphate synthase, chloroplastic OS=Leucosceptrum canum OX=694369 GN=GFDPS PE=1 SV=1;	PF00348.19	polyprenyl_synt	Polyprenyl synthetase
gene_Solyc02g089700.4	Solyc02g089700.4	Protein trichome birefringence-like 19 (AHRD V3.3 *** A0A1U8FI69_CAPAN)	7.33	7.2	5.84	17.35	27.93	16.34	6.79	20.54	GO:0005794;GO:0016021;GO:0016740;GO:001641	CC:Golgi apparatus;CC:integral component of membrane;MF:transferase activity;MF:O-acetyltransferase activity;	------	------	------	------	ENOG410YG6N	S:Function unknown	XP_019068017.1	protein trichome birefringence-like 19 isoform X2 [Solanum lycopersicum]	sp|Q9LFT0|TBL19_ARATH;	Protein trichome birefringence-like 19 OS=Arabidopsis thaliana OX=3702 GN=TBL19 PE=3 SV=1;	PF13839.8;PF14416.8	PC-Esterase;PMR5N	GDSL/SGNH-like Acyl-Esterase family found in Pmr5 and Cas1p;PMR5 N terminal Domain
gene_Solyc02g089900.1	Solyc02g089900.1	Protein kinase domain (AHRD V3.3 *** A0A200Q286_9MAGN)	33.11	25.19	25.19	49.49	68.05	44.75	27.83	54.0967	GO:0006468;GO:0016021;GO:0005886;GO:0005524;GO:000467	BP:protein phosphorylation;CC:integral component of membrane;CC:plasma membrane;MF:ATP binding;MF:protein kinase activity;	------	------	------	------	COG0515	T:Signal transduction mechanisms	XP_004232089.1	lysM domain receptor-like kinase 4 [Solanum lycopersicum]	sp|O64825|LYK4_ARATH;	LysM domain receptor-like kinase 4 OS=Arabidopsis thaliana OX=3702 GN=LYK4 PE=1 SV=1;	PF00069.27;PF07714.19;PF01476.22	Pkinase;PK_Tyr_Ser-Thr;LysM	Protein kinase domain;Protein tyrosine and serine/threonine kinase;LysM domain
gene_Solyc02g091430.4	Solyc02g091430.4	U-box domain-containing protein 4-like (AHRD V3.3 *** A0A2I4HV32_9ROSI)	10.81	13.36	10.95	24.48	24.39	24.69	11.7067	24.52	GO:0005737;GO:0005634;GO:000551	CC:cytoplasm;CC:nucleus;MF:protein binding;	------	------	------	------	ENOG410XRTN	S:Function unknown	XP_004231992.1	U-box domain-containing protein 2 isoform X2 [Solanum lycopersicum]	sp|Q9C7G1|PUB45_ARATH;	U-box domain-containing protein 45 OS=Arabidopsis thaliana OX=3702 GN=PUB45 PE=1 SV=1;	PF00514.25;PF04826.15	Arm;Arm_2	Armadillo/beta-catenin-like repeat;Armadillo-like
gene_Solyc02g093430.3	Solyc02g093430.3	Beta-1,4-N-acetylglucosaminyltransferase family protein (AHRD V3.3 *** Q9LT58_ARATH)	39.01	31.87	28.2	55.02	81.01	53.92	33.0267	63.3167	GO:0006487;GO:0006044;GO:0016021;GO:0016020;GO:0003830;GO:001675	BP:protein N-linked glycosylation;BP:N-acetylglucosamine metabolic process;CC:integral component of membrane;CC:membrane;MF:beta-1,4-mannosylglycoprotein 4-beta-N-acetylglucosaminyltransferase activity;MF:transferase activity, transferring glycosyl groups;	K00737	MGAT3	map00510	N-Glycan biosynthesis	ENOG410YQKP	S:Function unknown	XP_004231841.1	uncharacterized protein LOC101260885 isoform X1 [Solanum lycopersicum]	sp|Q02527|MGAT3_RAT;	Beta-1,4-mannosyl-glycoprotein 4-beta-N-acetylglucosaminyltransferase OS=Rattus norvegicus OX=10116 GN=Mgat3 PE=1 SV=2;	PF04724.15	Glyco_transf_17	Glycosyltransferase family 17
gene_Solyc03g007370.3	Solyc03g007370.3	Sigma factor (AHRD V3.3 *** A0A0G2STU5_9ROSI)	10.89	9.42	11.86	17.96	25.08	22.16	10.7233	21.7333	GO:0006355;GO:0006352;GO:0003700;GO:0016987;GO:000367	BP:regulation of transcription, DNA-templated;BP:DNA-templated transcription, initiation;MF:transcription factor activity, sequence-specific DNA binding;MF:sigma factor activity;MF:DNA binding;	K03093	sigI	------	------	COG0568	K:Transcription	XP_004234179.1	RNA polymerase sigma factor sigE, chloroplastic/mitochondrial isoform X1 [Solanum lycopersicum]	sp|Q9ZNX9|SIGE_ARATH;	RNA polymerase sigma factor sigE, chloroplastic/mitochondrial OS=Arabidopsis thaliana OX=3702 GN=SIGE PE=1 SV=1;	PF04539.18;PF04545.18;PF04542.16	Sigma70_r3;Sigma70_r4;Sigma70_r2	Sigma-70 region 3;Sigma-70, region 4;Sigma-70 region 2
gene_Solyc03g043740.5	Solyc03g043740.5	Hydroxyproline-rich glycoprotein family protein (AHRD V3.11 *** tr|A0A2U1M3E1|A0A2U1M3E1_ARTAN)	15.38	14.17	15.26	30.35	28.96	30.03	14.9367	29.78	GO:001602	CC:integral component of membrane;	------	------	------	------	ENOG410XWC4	S:Function unknown	XP_004234638.1	uncharacterized protein At5g65660 [Solanum lycopersicum]	sp|Q9LSK9|Y5566_ARATH;	Uncharacterized protein At5g65660 OS=Arabidopsis thaliana OX=3702 GN=At5g65660 PE=2 SV=1;	------	------	------
gene_Solyc03g081240.3	Solyc03g081240.3	Two-component response regulator-like APRR9 (AHRD V3.3 *** A0A2G2X7Z8_CAPBA)	50.35	53.82	47.84	103.77	110.47	111.91	50.67	108.717	GO:0000160;GO:0048511;GO:0005634;GO:000551	BP:phosphorelay signal transduction system;BP:rhythmic process;CC:nucleus;MF:protein binding;	K12130	PRR5	map04712	Circadian rhythm - plant	COG5641	K:Transcription	XP_004235024.1	two-component response regulator-like APRR5 [Solanum lycopersicum]	sp|Q6LA42|APRR5_ARATH;	Two-component response regulator-like APRR5 OS=Arabidopsis thaliana OX=3702 GN=APRR5 PE=1 SV=2;	PF00072.26;PF06203.16	Response_reg;CCT	Response regulator receiver domain;CCT motif
gene_Solyc03g082370.1	Solyc03g082370.1	Avr9/Cf-9 rapidly elicited protein 65 (AHRD V3.3 *** Q9FQZ0_TOBAC)	19.9	17.61	10.35	66.62	97.22	55.09	15.9533	72.9767	------	------	------	------	------	------	ENOG411173Q	S:Function unknown	XP_004235017.1	uncharacterized protein LOC101248276 [Solanum lycopersicum]	------	------	------	------	------
gene_Solyc03g095780.3	Solyc03g095780.3	abscisic acid receptor PYL4-like (AHRD V3.3 *** A0A2I4EQL0_9ROSI)	1.03	1.89	1.38	4.21	8.45	5.38	1.43333	6.01333	GO:0009738;GO:0080163;GO:0005737;GO:0005634;GO:0005886;GO:0038023;GO:0004864;GO:001042	BP:abscisic acid-activated signaling pathway;BP:regulation of protein serine/threonine phosphatase activity;CC:cytoplasm;CC:nucleus;CC:plasma membrane;MF:signaling receptor activity;MF:protein phosphatase inhibitor activity;MF:abscisic acid binding;	K14496	PYL	map04016;map04075	MAPK signaling pathway - plant;Plant hormone signal transduction	ENOG4111D40;ENOG4111MYF	S:Function unknown;	XP_004235232.1	abscisic acid receptor PYL4 [Solanum lycopersicum]	sp|O80920|PYL4_ARATH;	Abscisic acid receptor PYL4 OS=Arabidopsis thaliana OX=3702 GN=PYL4 PE=1 SV=1;	PF10604.11;PF00407.21;PF03364.22	Polyketide_cyc2;Bet_v_1;Polyketide_cyc	Polyketide cyclase / dehydrase and lipid transport;Pathogenesis-related protein Bet v 1 family;Polyketide cyclase / dehydrase and lipid transport
gene_Solyc03g098010.3	Solyc03g098010.3	phosphate starvation inducible gene TPSI1	1.03	0.86	0.73	2.7	3.12	3.24	0.873333	3.02	GO:0008198;GO:0008199;GO:0046872;GO:0003993;GO:001678	MF:ferrous iron binding;MF:ferric iron binding;MF:metal ion binding;MF:acid phosphatase activity;MF:hydrolase activity;	K14379	ACP5	map00740	Riboflavin metabolism	COG1409	S:Function unknown	XP_004235369.1	purple acid phosphatase 17 [Solanum lycopersicum]	sp|Q9SCX8|PPA17_ARATH;	Purple acid phosphatase 17 OS=Arabidopsis thaliana OX=3702 GN=PAP17 PE=2 SV=1;	PF00149.30	Metallophos	Calcineurin-like phosphoesterase
gene_Solyc03g113980.3	Solyc03g113980.3	Calmodulin binding protein-like (AHRD V3.3 *** A0A200RE12_9MAGN)	3.78	4.42	2.87	6.56	8.98	5.06	3.69	6.86667	GO:0080142;GO:0005634;GO:0003700;GO:0043565;GO:000551	BP:regulation of salicylic acid biosynthetic process;CC:nucleus;MF:transcription factor activity, sequence-specific DNA binding;MF:sequence-specific DNA binding;MF:calmodulin binding;	------	------	------	------	ENOG410YG1A	S:Function unknown	XP_015071167.1	calmodulin-binding protein 60 A-like [Solanum pennellii]	sp|C0SVV6|CB60A_ARATH;	Calmodulin-binding protein 60 A OS=Arabidopsis thaliana OX=3702 GN=CBP60A PE=2 SV=1;	PF07887.13	Calmodulin_bind	Calmodulin binding protein-like
gene_Solyc03g114940.3	Solyc03g114940.3	Cytochrome P450 (AHRD V3.3 *** A0A200PRH8_9MAGN)	40.15	44.73	49.71	68.16	109.02	101.02	44.8633	92.7333	GO:0055114;GO:0016021;GO:0004497;GO:0020037;GO:0016705;GO:000550	BP:oxidation-reduction process;CC:integral component of membrane;MF:monooxygenase activity;MF:heme binding;MF:oxidoreductase activity, acting on paired donors, with incorporation or reduction of molecular oxygen;MF:iron ion binding;	K20619	CYP78A	------	------	COG2124	Q:Secondary metabolites biosynthesis, transport and catabolism	XP_004236064.1	cytochrome P450 78A5-like [Solanum lycopersicum]	sp|Q9LMX7|C78A5_ARATH;	Cytochrome P450 78A5 OS=Arabidopsis thaliana OX=3702 GN=CYP78A5 PE=2 SV=1;	PF00067.24	p450	Cytochrome P450
gene_Solyc03g118330.3	Solyc03g118330.3	Receptor-like protein kinase (AHRD V3.3 *-* A0A2R6P698_ACTCH)	0.7	0.82	0.65	1.19	1.68	1.08	0.723333	1.31667	GO:0006468;GO:0016021;GO:0005886;GO:0004674;GO:0004672;GO:000552	BP:protein phosphorylation;CC:integral component of membrane;CC:plasma membrane;MF:protein serine/threonine kinase activity;MF:protein kinase activity;MF:ATP binding;	------	------	------	------	COG4886;COG0515	S:Function unknown;T:Signal transduction mechanisms	PHT49865.1	putative LRR receptor-like serine/threonine-protein kinase [Capsicum baccatum]	sp|C0LGP4|Y3475_ARATH;	Probable LRR receptor-like serine/threonine-protein kinase At3g47570 OS=Arabidopsis thaliana OX=3702 GN=At3g47570 PE=2 SV=1;	PF00069.27;PF07714.19;PF13855.8	Pkinase;PK_Tyr_Ser-Thr;LRR_8	Protein kinase domain;Protein tyrosine and serine/threonine kinase;Leucine rich repeat
gene_Solyc03g122070.3	Solyc03g122070.3	ABC transporter (AHRD V3.3 *-* A0A200QCT2_9MAGN)	0.49	0.33	0.23	0.85	0.83	1.07	0.35	0.916667	GO:0055085;GO:0016021;GO:0005887;GO:0042626;GO:0016887;GO:000552	BP:transmembrane transport;CC:integral component of membrane;CC:integral component of plasma membrane;MF:ATPase activity, coupled to transmembrane movement of substances;MF:ATPase activity;MF:ATP binding;	K05658	ABCB1, CD243	map02010	ABC transporters	COG1132	V:Defense mechanisms	XP_025886018.1	ABC transporter B family member 19-like isoform X2 [Solanum lycopersicum]	sp|Q9LJX0|AB19B_ARATH;	ABC transporter B family member 19 OS=Arabidopsis thaliana OX=3702 GN=ABCB19 PE=1 SV=1;	PF00664.25;PF00005.29;PF02463.21;PF09818.11;PF13191.8	ABC_membrane;ABC_tran;SMC_N;ABC_ATPase;AAA_16	ABC transporter transmembrane region;ABC transporter;RecF/RecN/SMC N terminal domain;Predicted ATPase of the ABC class;AAA ATPase domain
gene_Solyc04g005555.1	Solyc04g005555.1	CASP-like protein 4.1	31.97	32.72	35.38	60.22	84.23	64.04	33.3567	69.4967	GO:001602	CC:integral component of membrane;	------	------	------	------	ENOG411170W;ENOG4111CDN	S:Function unknown;	XP_004237048.1	uncharacterized protein LOC101249814 [Solanum lycopersicum]	------	------	------	------	------
gene_Solyc04g014690.3	Solyc04g014690.3	MAP kinase kinase kinase 32	2.78	2.79	2.26	3.95	7.03	5.15	2.61	5.37667	GO:0006468;GO:0004674;GO:0005524;GO:000467	BP:protein phosphorylation;MF:protein serine/threonine kinase activity;MF:ATP binding;MF:protein kinase activity;	------	------	------	------	COG0515	T:Signal transduction mechanisms	XP_004236673.1	serine/threonine-protein kinase HT1 [Solanum lycopersicum]	sp|Q2MHE4|HT1_ARATH;	Serine/threonine/tyrosine-protein kinase HT1 OS=Arabidopsis thaliana OX=3702 GN=HT1 PE=1 SV=1;	PF07714.19;PF00069.27;PF14531.8;PF17667.3	PK_Tyr_Ser-Thr;Pkinase;Kinase-like;Pkinase_fungal	Protein tyrosine and serine/threonine kinase;Protein kinase domain;Kinase-like;Fungal protein kinase
gene_Solyc04g074050.4	Solyc04g074050.4	Receptor protein kinase, putative (AHRD V3.3 *** A0A061FG24_THECC)	10.89	10.47	11.8	25.04	36.27	15.58	11.0533	25.63	GO:0009755;GO:0006468;GO:0016021;GO:0005886;GO:0004672;GO:0004713;GO:000552	BP:hormone-mediated signaling pathway;BP:protein phosphorylation;CC:integral component of membrane;CC:plasma membrane;MF:protein kinase activity;MF:protein tyrosine kinase activity;MF:ATP binding;	------	------	------	------	COG4886;COG0515	S:Function unknown;T:Signal transduction mechanisms	XP_010320171.1	MDIS1-interacting receptor like kinase 2-like isoform X4 [Solanum lycopersicum]	sp|Q8VZG8|MIK2_ARATH;	MDIS1-interacting receptor like kinase 2 OS=Arabidopsis thaliana OX=3702 GN=MIK2 PE=1 SV=3;	PF00069.27;PF07714.19;PF13855.8;PF12799.9;PF08263.14	Pkinase;PK_Tyr_Ser-Thr;LRR_8;LRR_4;LRRNT_2	Protein kinase domain;Protein tyrosine and serine/threonine kinase;Leucine rich repeat;Leucine Rich repeats;Leucine rich repeat N-terminal domain
gene_Solyc04g079420.3	Solyc04g079420.3	Disease resistance protein (CC-NBS-LRR class) family (AHRD V3.3 *** A0A1P8BE24_ARATH)	24.06	22.13	23.61	47.16	71.75	42.19	23.2667	53.7	GO:004353	MF:ADP binding;	------	------	------	------	ENOG410Y7SX	S:Function unknown	XP_004238189.1	probable disease resistance protein At4g33300 [Solanum lycopersicum]	sp|Q9SZA7|DRL29_ARATH;	Probable disease resistance protein At4g33300 OS=Arabidopsis thaliana OX=3702 GN=At4g33300 PE=2 SV=3;	PF00931.24;PF05659.13;PF12799.9;PF13401.8	NB-ARC;RPW8;LRR_4;AAA_22	NB-ARC domain;Arabidopsis broad-spectrum mildew resistance protein RPW8;Leucine Rich repeats;AAA domain
gene_Solyc04g081960.1	Solyc04g081960.1	Syringolide-induced protein 14-1.1	6.08	7.06	5.47	10.39	14.48	14.48	6.20333	13.1167	------	------	------	------	------	------	ENOG410YQZK	S:Function unknown	XP_004238391.1	uncharacterized protein At1g76070 [Solanum lycopersicum]	sp|Q9SGS5|Y1607_ARATH;	Uncharacterized protein At1g76070 OS=Arabidopsis thaliana OX=3702 GN=At1g76070 PE=1 SV=1;	------	------	------
gene_Solyc04g082220.3	Solyc04g082220.3	Lysine histidine transporter-like 8 (AHRD V3.3 *** A0A2G2X1G9_CAPBA)	2.74	1.94	1.86	4.3	5.6	3.54	2.18	4.48	GO:0006865;GO:0016021;GO:000588	BP:amino acid transport;CC:integral component of membrane;CC:plasma membrane;	------	------	------	------	COG0814	E:Amino acid transport and metabolism	XP_004238627.2	lysine histidine transporter-like 8 [Solanum lycopersicum]	sp|Q9SX98|LHTL8_ARATH;	Lysine histidine transporter-like 8 OS=Arabidopsis thaliana OX=3702 GN=AATL1 PE=1 SV=1;	PF01490.20	Aa_trans	Transmembrane amino acid transporter protein
gene_Solyc05g011970.3	Solyc05g011970.3	Cytochrome (AHRD V3.3 *** A0A1U8EZV2_CAPAN)	5.22	5.49	4.08	7.09	10.09	10.29	4.93	9.15667	GO:0055114;GO:0016021;GO:0004497;GO:0020037;GO:0016705;GO:000550	BP:oxidation-reduction process;CC:integral component of membrane;MF:monooxygenase activity;MF:heme binding;MF:oxidoreductase activity, acting on paired donors, with incorporation or reduction of molecular oxygen;MF:iron ion binding;	------	------	------	------	COG2124	Q:Secondary metabolites biosynthesis, transport and catabolism	XP_015075052.2	cytochrome P450 CYP749A22-like [Solanum pennellii]	sp|H2DH17|C7A22_PANGI;	Cytochrome P450 CYP749A22 OS=Panax ginseng OX=4054 PE=2 SV=1;	PF00067.24	p450	Cytochrome P450
gene_Solyc05g013750.3	Solyc05g013750.3	Protein-tyrosine-phosphatase MK.1	15.09	13.94	9.26	22.44	29.63	17.78	12.7633	23.2833	GO:0016311;GO:0004725;GO:0016301;GO:0051015;GO:000813	BP:dephosphorylation;MF:protein tyrosine phosphatase activity;MF:kinase activity;MF:actin filament binding;MF:protein tyrosine/serine/threonine phosphatase activity;	------	------	------	------	COG2453	T:Signal transduction mechanisms	XP_004239146.1	protein-tyrosine-phosphatase MKP1-like [Solanum lycopersicum]	sp|Q9C5S1|MKP1_ARATH;	Protein-tyrosine-phosphatase MKP1 OS=Arabidopsis thaliana OX=3702 GN=MKP1 PE=1 SV=1;	PF00782.22;PF00626.24	DSPc;Gelsolin	Dual specificity phosphatase, catalytic domain;Gelsolin repeat
gene_Solyc05g018413.2	Solyc05g018413.2	Sigma-B regulation protein RsbQ (AHRD V3.11 *** tr|A0A2T0KZ78|A0A2T0KZ78_9BURK)	26.29	34.19	24.61	60.56	70.46	41.93	28.3633	57.65	GO:0005737;GO:000563	CC:cytoplasm;CC:nucleus;	------	------	------	------	ENOG410XPCS;COG0596	S:Function unknown;	XP_004253481.2	strigolactone esterase D14 [Solanum lycopersicum]	sp|Q9SQR3|D14_ARATH;	Strigolactone esterase D14 OS=Arabidopsis thaliana OX=3702 GN=D14 PE=1 SV=1;	PF00561.22;PF12697.9;PF12146.10	Abhydrolase_1;Abhydrolase_6;Hydrolase_4	alpha/beta hydrolase fold;Alpha/beta hydrolase family;Serine aminopeptidase, S33
gene_Solyc06g009480.3	Solyc06g009480.3	R2R3MYB transcription factor 24	0	0.19	0.2	0.68	1.03	1.36	0.13	1.02333	GO:0006355;GO:0005634;GO:0003700;GO:004356	BP:regulation of transcription, DNA-templated;CC:nucleus;MF:transcription factor activity, sequence-specific DNA binding;MF:sequence-specific DNA binding;	K09422	MYBP	------	------	COG5147	K:Transcription	XP_004240646.2	transcription factor MYB78-like [Solanum lycopersicum]	sp|Q10MB4|MYB2_ORYSJ;	Transcription factor MYB2 OS=Oryza sativa subsp. japonica OX=39947 GN=MYB2 PE=2 SV=1;	PF00249.33;PF13921.8	Myb_DNA-binding;Myb_DNA-bind_6	Myb-like DNA-binding domain;Myb-like DNA-binding domain
gene_Solyc06g062540.3	Solyc06g062540.3	phosphatase (psi14C gene)	0.27	0.54	0.07	0.93	1.94	1.26	0.293333	1.37667	GO:0046872;GO:001679	MF:metal ion binding;MF:phosphatase activity;	K13248	PHOSPHO2	map00750;map01240	Vitamin B6 metabolism;Biosynthesis of cofactors	ENOG4111NAQ	S:Function unknown	NP_001266264.1	inorganic pyrophosphatase 1-like [Solanum lycopersicum]	sp|Q67YC0|PPSP1_ARATH;	Inorganic pyrophosphatase 1 OS=Arabidopsis thaliana OX=3702 GN=PS2 PE=1 SV=1;	PF06888.14;PF12710.9	Put_Phosphatase;HAD	Putative Phosphatase;haloacid dehalogenase-like hydrolase
gene_Solyc06g063190.3	Solyc06g063190.3	glutamate receptor-like 2.3	6.17	5.23	5.92	11.64	14.68	8.96	5.77333	11.76	GO:0016021;GO:0016020;GO:0005886;GO:0038023;GO:0015276;GO:000497	CC:integral component of membrane;CC:membrane;CC:plasma membrane;MF:signaling receptor activity;MF:ligand-gated ion channel activity;MF:ionotropic glutamate receptor activity;	K05387	GRIP	------	------	ENOG41120B7;ENOG410XQQV	P:Inorganic ion transport and metabolism;S:Function unknown	XP_004241862.2	glutamate receptor 2.8 [Solanum lycopersicum]	sp|Q9C5V5|GLR28_ARATH;	Glutamate receptor 2.8 OS=Arabidopsis thaliana OX=3702 GN=GLR2.8 PE=2 SV=2;	PF01094.30;PF00060.28;PF00497.22;PF13458.8;PF10613.11;PF13433.8	ANF_receptor;Lig_chan;SBP_bac_3;Peripla_BP_6;Lig_chan-Glu_bd;Peripla_BP_5	Receptor family ligand binding region;Ligand-gated ion channel;Bacterial extracellular solute-binding proteins, family 3;Periplasmic binding protein;Ligated ion channel L-glutamate- and glycine-binding site;Periplasmic binding protein domain
gene_Solyc06g068620.3	Solyc06g068620.3	elongation factor (AHRD V3.3 *-* AT5G43150.1)	65.88	81.12	58.18	156.46	138.96	185.2	68.3933	160.207	------	------	------	------	------	------	ENOG410YUES	S:Function unknown	XP_004241669.1	uncharacterized protein LOC101254501 [Solanum lycopersicum]	------	------	------	------	------
gene_Solyc06g075460.4	Solyc06g075460.4	Protein NRT1/ PTR FAMILY 2.7 (AHRD V3.3 *-* A0A1U8H096_CAPAN)	2.65	2.36	2.79	6.56	4.67	7.39	2.6	6.20667	GO:0006857;GO:0006817;GO:0016021;GO:0005886;GO:002285	BP:oligopeptide transport;BP:phosphate ion transport;CC:integral component of membrane;CC:plasma membrane;MF:transmembrane transporter activity;	K14638	SLC15A3_4, PHT	------	------	COG3104	E:Amino acid transport and metabolism	TMW93999.1	hypothetical protein EJD97_010892, partial [Solanum chilense]	sp|Q9M175|PTR39_ARATH;	Protein NRT1/ PTR FAMILY 2.3 OS=Arabidopsis thaliana OX=3702 GN=NPF2.3 PE=2 SV=1;	------	------	------
gene_Solyc06g083650.3	Solyc06g083650.3	GDSL esterase/lipase (AHRD V3.3 *** A0A2G3CC50_CAPCH)	17.01	22.77	22.53	52.79	80.4	28.95	20.77	54.0467	GO:0016021;GO:001678	CC:integral component of membrane;MF:hydrolase activity, acting on ester bonds;	------	------	------	------	COG3240	S:Function unknown	XP_004242381.1	GDSL esterase/lipase At5g33370 [Solanum lycopersicum]	sp|Q8LB81|GDL79_ARATH;	GDSL esterase/lipase At5g33370 OS=Arabidopsis thaliana OX=3702 GN=At5g33370 PE=2 SV=1;	PF00657.24	Lipase_GDSL	GDSL-like Lipase/Acylhydrolase
gene_Solyc07g006620.4	Solyc07g006620.4	Protein kinase superfamily protein (AHRD V3.3 *** A0A2U1L2N8_ARTAN)	17.49	20.46	19.81	34.64	39.45	39.48	19.2533	37.8567	GO:0006468;GO:0005524;GO:000467	BP:protein phosphorylation;MF:ATP binding;MF:protein kinase activity;	------	------	------	------	COG0515	T:Signal transduction mechanisms	XP_010323234.1	probable receptor-like serine/threonine-protein kinase At5g57670 isoform X1 [Solanum lycopersicum]	sp|Q5XF57|Y5576_ARATH;	Probable receptor-like serine/threonine-protein kinase At5g57670 OS=Arabidopsis thaliana OX=3702 GN=At5g57670 PE=2 SV=1;	PF00069.27;PF07714.19	Pkinase;PK_Tyr_Ser-Thr	Protein kinase domain;Protein tyrosine and serine/threonine kinase
gene_Solyc07g014680.4	Solyc07g014680.4	Potassium transporter (AHRD V3.3 *-* A0MNZ1_EUTHA)	0.77	0.41	1.22	2.12	2.32	2.18	0.8	2.20667	GO:0006812;GO:0055085;GO:0016021;GO:0005886;GO:0015081;GO:000832	BP:cation transport;BP:transmembrane transport;CC:integral component of membrane;CC:plasma membrane;MF:sodium ion transmembrane transporter activity;MF:cation transmembrane transporter activity;	K24976	TRK, HKT	------	------	COG0168	P:Inorganic ion transport and metabolism	CCJ09642.1	Na+ transporter [Solanum lycopersicum var. cerasiforme]	sp|Q6H501|HKT6_ORYSJ;	Probable cation transporter HKT6 OS=Oryza sativa subsp. japonica OX=39947 GN=HKT6 PE=2 SV=2;	PF02386.18	TrkH	Cation transport protein
gene_Solyc07g040890.1	Solyc07g040890.1	Alpha/beta-hydrolases superfamily protein (AHRD V3.3 *** A0A2U1LX98_ARTAN)	3.95	3.2	2.53	7.2	8.56	4.43	3.22667	6.73	GO:001678	MF:hydrolase activity;	------	------	------	------	COG0657	I:Lipid transport and metabolism	XP_010324041.1	probable carboxylesterase 120 [Solanum lycopersicum]	sp|Q9LVB8|CXE20_ARATH;	Probable carboxylesterase 120 OS=Arabidopsis thaliana OX=3702 GN=CXE20 PE=2 SV=1;	PF07859.15;PF00135.30;PF12740.9;PF10340.11	Abhydrolase_3;COesterase;Chlorophyllase2;Say1_Mug180	alpha/beta hydrolase fold;Carboxylesterase family;Chlorophyllase enzyme;Steryl acetyl hydrolase
gene_Solyc07g045100.1	Solyc07g045100.1	Eukaryotic aspartyl protease family protein (AHRD V3.3 *** G7KD30_MEDTR)	12.28	10.22	10.22	16.86	29.69	20.3	10.9067	22.2833	GO:000419	MF:aspartic-type endopeptidase activity;	K22683	APF2	------	------	ENOG410XNV7	O:Posttranslational modification, protein turnover, chaperones	XP_004243605.1	aspartyl protease family protein 2 [Solanum lycopersicum]	sp|Q9LNJ3|APF2_ARATH;	Aspartyl protease family protein 2 OS=Arabidopsis thaliana OX=3702 GN=APF2 PE=2 SV=1;	PF14543.8;PF14541.8;PF00026.25	TAXi_N;TAXi_C;Asp	Xylanase inhibitor N-terminal;Xylanase inhibitor C-terminal;Eukaryotic aspartyl protease
gene_Solyc07g052060.2	Solyc07g052060.2	Pelargonidin 3-o-(6-caffeoylglucoside) 5-o-(6-o-malonylglucoside) 4'''-malonyltransferase (AHRD V3.3 *** G9HTF6_NICAT)	5.81	6.2	7.11	12.38	9.67	16.19	6.37333	12.7467	GO:001674	MF:transferase activity, transferring acyl groups other than amino-acyl groups;	K13065	E2.3.1.133, HCT	map00941;map00940;map00945	Flavonoid biosynthesis;Phenylpropanoid biosynthesis;Stilbenoid, diarylheptanoid and gingerol biosynthesis	------	------	XP_004243480.1	acetyl-CoA-benzylalcohol acetyltransferase [Solanum lycopersicum]	sp|Q9SPU3|BEATL_CLABR;	Acetyl-CoA-benzylalcohol acetyltransferase OS=Clarkia breweri OX=36903 GN=BEAT PE=1 SV=1;	PF02458.17	Transferase	Transferase family
gene_Solyc07g055670.1	Solyc07g055670.1	Lectin-domain receptor-like kinase (AHRD V3.3 *-* G4XXY5_NICAT)	1.66	1.52	2.43	4.82	10.31	5.17	1.87	6.76667	GO:0006468;GO:0048544;GO:0016021;GO:0030246;GO:0005524;GO:0004672;GO:0106310;GO:010631	BP:protein phosphorylation;BP:recognition of pollen;CC:integral component of membrane;MF:carbohydrate binding;MF:ATP binding;MF:protein kinase activity;MF:old GO;MF:old GO;	------	------	------	------	ENOG410YBSH;COG0515;COG5434	T:Signal transduction mechanisms;M:Cell wall/membrane/envelope biogenesis	XP_025887901.1	G-type lectin S-receptor-like serine/threonine-protein kinase SD2-5 [Solanum lycopersicum]	sp|Q8RWZ5|SD25_ARATH;	G-type lectin S-receptor-like serine/threonine-protein kinase SD2-5 OS=Arabidopsis thaliana OX=3702 GN=SD25 PE=1 SV=1;	PF00069.27;PF07714.19;PF03109.18	Pkinase;PK_Tyr_Ser-Thr;ABC1	Protein kinase domain;Protein tyrosine and serine/threonine kinase;ABC1 atypical kinase-like domain
gene_Solyc07g063320.3	Solyc07g063320.3	LanC-like protein GCR2 (AHRD V3.3 *** A0A2G3C294_CAPCH)	0.41	0.41	0.59	1.37	2.05	2.13	0.47	1.85	GO:0005975;GO:000588	BP:carbohydrate metabolic process;CC:plasma membrane;	------	------	------	------	ENOG410XQIA	S:Function unknown	XP_004244212.1	lanC-like protein GCR2 [Solanum lycopersicum]	sp|F4IEM5|GCR2_ARATH;	LanC-like protein GCR2 OS=Arabidopsis thaliana OX=3702 GN=GCR2 PE=1 SV=1;	PF05147.15	LANC_like	Lanthionine synthetase C-like protein
gene_Solyc08g007080.4	Solyc08g007080.4	type I inositol polyphosphate 5-phosphatase 2-like (AHRD V3.3 *** A0A2I4GAB5_9ROSI)	25.03	25.18	27.63	49.25	71.2	53.69	25.9467	58.0467	GO:0009737;GO:0032957;GO:0009845;GO:0046856;GO:0046855;GO:0016787;GO:0004439;GO:0034485;GO:000444	BP:response to abscisic acid;BP:inositol trisphosphate metabolic process;BP:seed germination;BP:phosphatidylinositol dephosphorylation;BP:inositol phosphate dephosphorylation;MF:hydrolase activity;MF:phosphatidylinositol-4,5-bisphosphate 5-phosphatase activity;MF:phosphatidylinositol-3,4,5-trisphosphate 5-phosphatase activity;MF:inositol-polyphosphate 5-phosphatase activity;	K24221	IP5P1_2	map00562	Inositol phosphate metabolism	COG5411	T:Signal transduction mechanisms	XP_010324566.1	type I inositol polyphosphate 5-phosphatase 2-like isoform X1 [Solanum lycopersicum]	sp|Q9FUR2|IP5P2_ARATH;	Type I inositol polyphosphate 5-phosphatase 2 OS=Arabidopsis thaliana OX=3702 GN=IP5P2 PE=1 SV=2;	PF03372.25	Exo_endo_phos	Endonuclease/Exonuclease/phosphatase family
gene_Solyc08g065220.3	Solyc08g065220.3	glycine decarboxylase p-protein	311.63	339.54	299.17	665.38	741.38	539.65	316.78	648.803	GO:0019464;GO:0006546;GO:0055114;GO:0009941;GO:0005960;GO:0005739;GO:0048046;GO:0004375;GO:0030170;GO:001659	BP:glycine decarboxylation via glycine cleavage system;BP:glycine catabolic process;BP:oxidation-reduction process;CC:chloroplast envelope;CC:glycine cleavage complex;CC:mitochondrion;CC:apoplast;MF:glycine dehydrogenas;MF:pyridoxal phosphate binding;MF:glycine binding;	K00281	GLDC, gcvP	map00630;map00260	Glyoxylate and dicarboxylate metabolism;Glycine, serine and threonine metabolism	COG0403	E:Amino acid transport and metabolism	XP_004245101.1	glycine dehydrogenase (decarboxylating), mitochondrial [Solanum lycopersicum]	sp|O49954|GCSP_SOLTU;	Glycine dehydrogenase;	PF02347.18;PF00266.21;PF01212.23	GDC-P;Aminotran_5;Beta_elim_lyase	Glycine cleavage system P-protein;Aminotransferase class-V;Beta-eliminating lyase
gene_Solyc08g066770.3	Solyc08g066770.3	Ankyrin repeat (AHRD V3.3 *** A0A200QDM7_9MAGN)	28.48	25.34	21.79	43.54	57.22	38.67	25.2033	46.4767	GO:0016021;GO:001602	CC:integral component of membrane;CC:membrane;	------	------	------	------	COG0666	S:Function unknown	XP_004245176.1	ankyrin repeat-containing protein NPR4-like [Solanum lycopersicum]	sp|Q9ZU96|Y2168_ARATH;	Ankyrin repeat-containing protein At2g01680 OS=Arabidopsis thaliana OX=3702 GN=At2g01680 PE=2 SV=1;	PF12796.9;PF13606.8;PF13637.8;PF13857.8;PF13962.8;PF00023.32	Ank_2;Ank_3;Ank_4;Ank_5;PGG;Ank	Ankyrin repeats;Ankyrin repeat;Ankyrin repeats;Ankyrin repeats;Domain of unknown function;Ankyrin repeat
gene_Solyc08g068540.4	Solyc08g068540.4	B3 domain-containing protein (AHRD V3.3 *** A0A1Q3CXA6_CEPFO)	1.2	1.12	0.9	1.76	2.14	2.12	1.07333	2.00667	GO:0005634;GO:000367	CC:nucleus;MF:DNA binding;	------	------	------	------	ENOG410YZ3E	K:Transcription	XP_027774064.1	B3 domain-containing transcription factor VRN1-like isoform X1 [Solanum pennellii]	sp|Q8L3W1|VRN1_ARATH;	B3 domain-containing transcription factor VRN1 OS=Arabidopsis thaliana OX=3702 GN=VRN1 PE=1 SV=1;	PF02362.23	B3	B3 DNA binding domain
gene_Solyc08g078950.3	Solyc08g078950.3	NIT1	34.9	36.66	30.8	70.16	100.17	77.61	34.12	82.6467	GO:0006857;GO:0010167;GO:0006817;GO:0055085;GO:0016021;GO:0016020;GO:0022857;GO:001511	BP:oligopeptide transport;BP:response to nitrate;BP:phosphate ion transport;BP:transmembrane transport;CC:integral component of membrane;CC:membrane;MF:transmembrane transporter activity;MF:nitrate transmembrane transporter activity;	------	------	------	------	COG3104	E:Amino acid transport and metabolism	XP_004245746.1	protein NRT1/ PTR FAMILY 6.3 [Solanum lycopersicum]	sp|Q05085|PTR7_ARATH;	Protein NRT1/ PTR FAMILY 6.3 OS=Arabidopsis thaliana OX=3702 GN=NPF6.3 PE=1 SV=1;	PF00854.23	PTR2	POT family
gene_Solyc08g082120.2	Solyc08g082120.2	Methanol inducible protein (AHRD V3.3 *** D1MAX5_NICBE)	137.4	205.9	305.17	402.17	636.48	408.57	216.157	482.407	------	------	------	------	------	------	ENOG410YW3H	S:Function unknown	XP_004245528.1	hornerin [Solanum lycopersicum]	------	------	------	------	------
gene_Solyc08g082180.3	Solyc08g082180.3	Abscisic acid receptor PYL8 (AHRD V3.3 *** A0A2G3DB14_CAPCH)	15.84	18.81	15.94	41.12	47.39	39.3	16.8633	42.6033	GO:0009738;GO:0080163;GO:0005737;GO:0005634;GO:0005886;GO:0038023;GO:0004864;GO:001042	BP:abscisic acid-activated signaling pathway;BP:regulation of protein serine/threonine phosphatase activity;CC:cytoplasm;CC:nucleus;CC:plasma membrane;MF:signaling receptor activity;MF:protein phosphatase inhibitor activity;MF:abscisic acid binding;	K14496	PYL	map04016;map04075	MAPK signaling pathway - plant;Plant hormone signal transduction	ENOG4111HU5	S:Function unknown	XP_004245523.1	abscisic acid receptor PYL3 [Solanum lycopersicum]	sp|Q6EN42|PYL3_ORYSJ;	Abscisic acid receptor PYL3 OS=Oryza sativa subsp. japonica OX=39947 GN=PYL3 PE=1 SV=1;	PF10604.11	Polyketide_cyc2	Polyketide cyclase / dehydrase and lipid transport
gene_Solyc09g005030.3	Solyc09g005030.3	Homeodomain-like superfamily protein (AHRD V3.3 *-* Q9SIZ5_ARATH)	3.84	6.05	4.52	9.7	13.99	7.52	4.80333	10.4033	GO:0005634;GO:000367	CC:nucleus;MF:DNA binding;	------	------	------	------	ENOG410YQHF	K:Transcription	XP_004246781.1	probable transcription factor KAN2 [Solanum lycopersicum]	sp|Q700D9|MYBF_ARATH;	Putative Myb family transcription factor At1g14600 OS=Arabidopsis thaliana OX=3702 GN=At1g14600 PE=2 SV=2;	PF00249.33	Myb_DNA-binding	Myb-like DNA-binding domain
gene_Solyc09g010780.3	Solyc09g010780.3	Protein phosphatase 2C (AHRD V3.3 *-* A0A2U1P5P3_ARTAN)	4.04	4.44	3.78	6.59	9.84	6.76	4.08667	7.73	GO:0006470;GO:0004722;GO:000382	BP:protein dephosphorylation;MF:protein serine/threonine phosphatase activity;MF:catalytic activity;	------	------	------	------	COG0631	T:Signal transduction mechanisms	XP_004246408.1	probable protein phosphatase 2C 23 [Solanum lycopersicum]	sp|Q9ZV25|P2C23_ARATH;	Probable protein phosphatase 2C 23 OS=Arabidopsis thaliana OX=3702 GN=PLL4 PE=2 SV=1;	PF00481.23	PP2C	Protein phosphatase 2C
gene_Solyc09g066150.2	Solyc09g066150.2	Cytochrome P450 (AHRD V3.3 *** A0A200Q4A2_9MAGN)	2.95	3.97	3.15	6.07	8.85	5.73	3.35667	6.88333	GO:0055114;GO:0016021;GO:0005506;GO:0016705;GO:002003	BP:oxidation-reduction process;CC:integral component of membrane;MF:iron ion binding;MF:oxidoreductase activity, acting on paired donors, with incorporation or reduction of molecular oxygen;MF:heme binding;	K20769	CYP94A5	map00073	Cutin, suberine and wax biosynthesis	COG2124	Q:Secondary metabolites biosynthesis, transport and catabolism	XP_004247227.1	cytochrome P450 94A1-like [Solanum lycopersicum]	sp|P98188|C94A2_VICSA;	Cytochrome P450 94A2 OS=Vicia sativa OX=3908 GN=CYP94A2 PE=2 SV=1;	PF00067.24	p450	Cytochrome P450
gene_Solyc09g075060.3	Solyc09g075060.3	Beta-glucosidase 10 (AHRD V3.3 *** A0A2G2ZW54_CAPAN)	9.57	8.68	7.68	16.64	22.51	15.16	8.64333	18.1033	GO:0005975;GO:0016021;GO:0008422;GO:000455	BP:carbohydrate metabolic process;CC:integral component of membrane;MF:beta-glucosidase activity;MF:hydrolase activity, hydrolyzing O-glycosyl compounds;	K01188	E3.2.1.21	map00460;map00500;map00999	Cyanoamino acid metabolism;Starch and sucrose metabolism;Biosynthesis of various plant secondary metabolites	COG2723	G:Carbohydrate transport and metabolism	XP_004247424.1	beta-glucosidase 11-like [Solanum lycopersicum]	sp|B3H5Q1|BGL11_ARATH;	Beta-glucosidase 11 OS=Arabidopsis thaliana OX=3702 GN=BGLU11 PE=2 SV=2;	PF00232.20	Glyco_hydro_1	Glycosyl hydrolase family 1
gene_Solyc09g082670.3	Solyc09g082670.3	Heat shock transcription factor (AHRD V3.3 *-* A0A1Y1I763_KLENI)	1.45	1.59	2.05	3.26	4.24	5.38	1.69667	4.29333	GO:0006355;GO:0006357;GO:0034605;GO:0005634;GO:0043565;GO:0003700;GO:000097	BP:regulation of transcription, DNA-templated;BP:regulation of transcription from RNA polymerase II promoter;BP:cellular response to heat;CC:nucleus;MF:sequence-specific DNA binding;MF:transcription factor activity, sequence-specific DNA binding;MF:RNA polymerase II core promoter proximal region sequence-specific DNA binding;	K09419	HSFF	------	------	COG5169	K:Transcription	XP_004247676.1	heat stress transcription factor A-6b [Solanum lycopersicum]	sp|Q9LUH8|HFA6B_ARATH;	Heat stress transcription factor A-6b OS=Arabidopsis thaliana OX=3702 GN=HSFA6b PE=2 SV=1;	PF00447.19	HSF_DNA-bind	HSF-type DNA-binding
gene_Solyc09g089790.3	Solyc09g089790.3	2-oxoglutarate (2OG) and Fe(II)-dependent oxygenase superfamily protein (AHRD V3.3 *** O80850_ARATH)	0.37	0.54	0.5	1.25	2.44	1.78	0.47	1.82333	GO:0055114;GO:0031418;GO:0046872;GO:001649	BP:oxidation-reduction process;MF:L-ascorbic acid binding;MF:metal ion binding;MF:oxidoreductase activity;	------	------	------	------	COG3491	S:Function unknown	XP_004247712.1	1-aminocyclopropane-1-carboxylate oxidase homolog 1-like [Solanum lycopersicum]	sp|Q84MB3|ACCH1_ARATH;	1-aminocyclopropane-1-carboxylate oxidase homolog 1 OS=Arabidopsis thaliana OX=3702 GN=At1g06620 PE=2 SV=1;	PF03171.22;PF14226.8	2OG-FeII_Oxy;DIOX_N	2OG-F;non-haem dioxygenase in morphine synthesis N-terminal
gene_Solyc09g090730.2	Solyc09g090730.2	AMT1	63.42	58.11	56.57	107.1	163.39	81.14	59.3667	117.21	GO:0072488;GO:0015696;GO:0016021;GO:0016020;GO:0005887;GO:0008519;GO:0004523;GO:000367	BP:ammonium transmembrane transport;BP:ammonium transport;CC:integral component of membrane;CC:membrane;CC:integral component of plasma membrane;MF:ammonium transmembrane transporter activity;MF:RNA-DNA hybrid ribonuclease activity;MF:nucleic acid binding;	K03320	amt, AMT, MEP	------	------	COG0004	P:Inorganic ion transport and metabolism	NP_001304667.1	ammonium transporter 1 member 1 [Solanum lycopersicum]	sp|P58905|AMT11_SOLLC;	Ammonium transporter 1 member 1 OS=Solanum lycopersicum OX=4081 GN=AMT1-1 PE=2 SV=1;	PF00909.23	Ammonium_transp	Ammonium Transporter Family
gene_Solyc10g008160.3	Solyc10g008160.3	uniform ripening	0.41	0.57	0.43	1.49	1.86	0.97	0.47	1.44	GO:0045893;GO:0005634;GO:0003700;GO:0000976;GO:000367	BP:positive regulation of transcription, DNA-templated;CC:nucleus;MF:transcription factor activity, sequence-specific DNA binding;MF:transcription regulatory region sequence-specific DNA binding;MF:DNA binding;	------	------	------	------	ENOG4111SK7	K:Transcription	NP_001266252.1	transcription factor GLK2 [Solanum lycopersicum]	sp|Q5Z5I4|GLK1_ORYSJ;	Probable transcription factor GLK1 OS=Oryza sativa subsp. japonica OX=39947 GN=GLK1 PE=2 SV=1;	------	------	------
gene_Solyc10g008247.1	Solyc10g008247.1	transcription factor bHLH36-like (AHRD V3.3 *** A0A2I4FJG0_9ROSI)	0.27	0.31	0.29	0.45	0.86	0.98	0.29	0.763333	GO:0006357;GO:0005634;GO:0090575;GO:0003700;GO:0000977;GO:0046983;GO:000098	BP:regulation of transcription from RNA polymerase II promoter;CC:nucleus;CC:RNA polymerase II transcription factor complex;MF:transcription factor activity, sequence-specific DNA binding;MF:RNA polymerase II regulatory region sequence-specific DNA binding;MF:protein dimerization activity;MF:RNA polymerase II transcription factor activity, sequence-specific DNA binding;	------	------	------	------	ENOG41119GS	K:Transcription	XP_004248474.1	uncharacterized protein LOC101259680 [Solanum lycopersicum]	sp|F4JIJ7|BH162_ARATH;	Transcription factor bHLH162 OS=Arabidopsis thaliana OX=3702 GN=BHLH162 PE=1 SV=1;	------	------	------
gene_Solyc10g055760.2	Solyc10g055760.2	NAC domain-containing protein 2 (AHRD V3.3 *** A0A1U8EDX1_CAPAN)	53.42	48.44	59.73	104.8	196.26	80.8	53.8633	127.287	GO:0045792;GO:0010200;GO:0048281;GO:0009965;GO:0006355;GO:000367	BP:negative regulation of cell size;BP:response to chitin;BP:inflorescence morphogenesis;BP:leaf morphogenesis;BP:regulation of transcription, DNA-templated;MF:DNA binding;	------	------	------	------	ENOG410Y9QS	S:Function unknown	XP_004248638.1	NAC domain-containing protein 22 [Solanum lycopersicum]	sp|I1LPE9|NAC6_SOYBN;	NAC domain-containing protein 6 OS=Glycine max OX=3847 GN=NAC6 PE=2 SV=1;	PF02365.17	NAM	No apical meristem
gene_Solyc10g076280.3	Solyc10g076280.3	Solute carrier family 40 protein (AHRD V3.3 *** A0A2G3BE97_CAPCH)	1.16	1.44	1.07	1.54	2.09	2.64	1.22333	2.09	GO:0006826;GO:0006817;GO:0034755;GO:0016021;GO:000538	BP:iron ion transport;BP:phosphate ion transport;BP:iron ion transmembrane transport;CC:integral component of membrane;MF:iron ion transmembrane transporter activity;	K14685	SLC40A1, FPN1	------	------	ENOG410XS3F	U:Intracellular trafficking, secretion, and vesicular transport	XP_004249709.2	solute carrier family 40 member 2-like isoform X1 [Solanum lycopersicum]	sp|F4KGN5|S40A2_ARATH;	Solute carrier family 40 member 2 OS=Arabidopsis thaliana OX=3702 GN=IREG2 PE=2 SV=1;	PF06963.14	FPN1	Ferroportin1
gene_Solyc11g011360.2	Solyc11g011360.2	Nudix hydrolase 17, mitochondrial (AHRD V3.3 *** A0A1U8GUV5_CAPAN)	4.72	2.47	5.07	10.41	10.05	5.88	4.08667	8.78	GO:0005737;GO:0005634;GO:001678	CC:cytoplasm;CC:nucleus;MF:hydrolase activity;	K07766	E3.6.1.52	------	------	COG0494	L:Replication, recombination and repair	XP_004250193.1	nudix hydrolase 18, mitochondrial-like [Solanum lycopersicum]	sp|Q9ZU95|NUD17_ARATH;	Nudix hydrolase 17, mitochondrial OS=Arabidopsis thaliana OX=3702 GN=NUDT17 PE=2 SV=1;	PF00293.30	NUDIX	NUDIX domain
gene_Solyc11g015890.2	Solyc11g015890.2	F-box domain-containing protein (AHRD V3.3 *** A0A2U1KDV8_ARTAN)	0.86	1.09	0.69	2.48	2.83	2.68	0.88	2.66333	GO:0016021;GO:000551	CC:integral component of membrane;MF:protein binding;	------	------	------	------	------	------	XP_010312919.1	F-box/kelch-repeat protein At3g06240-like [Solanum lycopersicum]	sp|Q8GXC7|FBK50_ARATH;	F-box/kelch-repeat protein At3g06240 OS=Arabidopsis thaliana OX=3702 GN=At3g06240 PE=2 SV=1;	PF00646.35;PF12937.9	F-box;F-box-like	F-box domain;F-box-like
gene_Solyc11g068920.1	Solyc11g068920.1	RING-type E3 ubiquitin transferase (AHRD V3.3 *** A0A2G2VPU6_CAPBA)	0.16	0.26	0.22	0.66	0.79	0.9	0.213333	0.783333	GO:0016567;GO:000484	BP:protein ubiquitination;MF:ubiquitin-protein transferase activity;	------	------	------	------	ENOG410YC1Z	O:Posttranslational modification, protein turnover, chaperones	XP_004251095.1	E3 ubiquitin-protein ligase PUB23-like [Solanum lycopersicum]	sp|Q84TG3|PUB23_ARATH;	E3 ubiquitin-protein ligase PUB23 OS=Arabidopsis thaliana OX=3702 GN=PUB23 PE=1 SV=1;	PF04564.17;PF11789.10	U-box;zf-Nse	U-box domain;Zinc-finger of the MIZ type in Nse subunit
gene_Solyc12g006850.2	Solyc12g006850.2	LELKT1GEN L.esculentum potassium channel	8.49	6.98	6.49	18.44	20.49	14.27	7.32	17.7333	GO:0006811;GO:0055085;GO:0016020;GO:0016021;GO:0016301;GO:0005216;GO:000524	BP:ion transport;BP:transmembrane transport;CC:membrane;CC:integral component of membrane;MF:kinase activity;MF:ion channel activity;MF:voltage-gated potassium channel activity;	K21867	AKT, KAT, GORK, SKOR	------	------	ENOG410XPSE	U:Intracellular trafficking, secretion, and vesicular transport	NP_001234258.2	potassium channel [Solanum lycopersicum]	sp|Q38998|AKT1_ARATH;	Potassium channel AKT1 OS=Arabidopsis thaliana OX=3702 GN=AKT1 PE=1 SV=2;	PF00520.33;PF12796.9;PF11834.10;PF00023.32;PF13857.8;PF13637.8;PF00027.31;PF13606.8;PF07885.18	Ion_trans;Ank_2;KHA;Ank;Ank_5;Ank_4;cNMP_binding;Ank_3;Ion_trans_2	Ion transport protein;Ankyrin repeats;KHA, dimerisation domain of potassium ion channel;Ankyrin repeat;Ankyrin repeats;Ankyrin repeats;Cyclic nucleotide-binding domain;Ankyrin repeat;Ion channel
gene_Solyc12g008960.2	Solyc12g008960.2	Calmodulin-binding protein (AHRD V3.3 *** A0A2U1QIJ0_ARTAN)	2.8	2.93	2.82	6.54	7.69	5.26	2.85	6.49667	GO:000563	CC:nucleus;	------	------	------	------	ENOG4111I0K;ENOG410XYNX	S:Function unknown;	XP_004251676.1	IQ domain-containing protein IQM1 [Solanum lycopersicum]	sp|Q058N0|IQM5_ARATH;	IQ domain-containing protein IQM5 OS=Arabidopsis thaliana OX=3702 GN=IQM5 PE=2 SV=1;	------	------	------
gene_Solyc12g009480.2	Solyc12g009480.2	SPX domain-containing protein (AHRD V3.3 *** A0A1Q3BK26_CEPFO)	18.11	23.59	20.47	33.26	47.14	37.4	20.7233	39.2667	GO:0016036;GO:000563	BP:cellular response to phosphate starvation;CC:nucleus;	------	------	------	------	ENOG4111K3Y	T:Signal transduction mechanisms	XP_004251718.1	SPX domain-containing protein 1 [Solanum lycopersicum]	sp|O48781|SPX2_ARATH;	SPX domain-containing protein 2 OS=Arabidopsis thaliana OX=3702 GN=SPX2 PE=2 SV=1;	PF03105.21	SPX	SPX domain
gene_Solyc12g010570.1	Solyc12g010570.1	Tetraspanin (AHRD V3.3 *** A0A200Q8V3_9MAGN)	10.97	10.55	9.2	18.87	29.5	16.13	10.24	21.5	GO:0006811;GO:0016021;GO:0009506;GO:000588	BP:ion transport;CC:integral component of membrane;CC:plasmodesma;CC:plasma membrane;	------	------	------	------	ENOG410XRN9	S:Function unknown	XP_004251785.1	tetraspanin-8 [Solanum lycopersicum]	sp|Q8S8Q6|TET8_ARATH;	Tetraspanin-8 OS=Arabidopsis thaliana OX=3702 GN=TET8 PE=2 SV=1;	PF00335.22;PF12679.9;PF07264.13	Tetraspanin;ABC2_membrane_2;EI24	Tetraspanin family;ABC-2 family transporter protein;Etoposide-induced protein 2.4
gene_Solyc12g010710.1	Solyc12g010710.1	Unknown protein	3.34	3.22	4.63	10.31	19.66	12.2	3.73	14.0567	GO:001602	CC:integral component of membrane;	------	------	------	------	ENOG4111CKW	S:Function unknown	TMW87167.1	hypothetical protein EJD97_020335 [Solanum chilense]	------	------	------	------	------
gene_Solyc12g035710.2	Solyc12g035710.2	DUF.1	5.36	5.5	5.83	10.87	9.88	12.3	5.56333	11.0167	GO:001602	CC:integral component of membrane;	K16302	CNNM	------	------	COG1253	P:Inorganic ion transport and metabolism	XP_004252223.1	DUF21 domain-containing protein At4g14240 [Solanum lycopersicum]	sp|Q67XQ0|Y4424_ARATH;	DUF21 domain-containing protein At4g14240 OS=Arabidopsis thaliana OX=3702 GN=CBSDUF1 PE=1 SV=1;	PF01595.22	DUF21	Cyclin M transmembrane N-terminal domain
gene_Solyc12g056360.1	Solyc12g056360.1	Pathogenesis-related thaumatin family protein (AHRD V3.3 *** A0A2K3LJG6_TRIPR)	6.83	4.55	6.89	14.03	22.92	7.83	6.09	14.9267	GO:0006952;GO:000557	BP:defense response;CC:extracellular region;	------	------	------	------	ENOG410YD4X	S:Function unknown	XP_010314488.1	thaumatin-like protein [Solanum lycopersicum]	sp|P81370|TLP_ACTDE;	Thaumatin-like protein OS=Actinidia deliciosa OX=3627 GN=tlp PE=1 SV=2;	PF00314.19	Thaumatin	Thaumatin family
gene_Solyc12g096350.2	Solyc12g096350.2	WRKY transcription factor 10	6.38	4.89	5.86	10.3	14.61	7.65	5.71	10.8533	GO:0006355;GO:0005634;GO:0003700;GO:004356	BP:regulation of transcription, DNA-templated;CC:nucleus;MF:transcription factor activity, sequence-specific DNA binding;MF:sequence-specific DNA binding;	------	------	------	------	ENOG410YD1E	K:Transcription	NP_001308135.1	probable WRKY transcription factor 17 [Solanum lycopersicum]	sp|Q9SV15|WRK11_ARATH;	Probable WRKY transcription factor 11 OS=Arabidopsis thaliana OX=3702 GN=WRKY11 PE=2 SV=2;	PF03106.17;PF10533.11	WRKY;Plant_zn_clust	WRKY DNA -binding domain;Plant zinc cluster domain

## Sheet: Pb_vs_Control_cluster2
Supplementary Dataset 1d. Gene co-expression clusters of DEGs in Pd vs. Control group of tomato seedlings.
Gene_id	Gene_name	Gene_description	Control_1	Control_2	Control_3	Pb_1	Pb_2	Pb_3	Control	Pb	GO_id	GO_term	KO_id	KO_name	Pathway_id	Pathway_definition	COG_id	COG_Functional Categories	NR_hit-name	NR_description	Swiss-Prot_hit-name	Swiss-Prot_description	Pfam_id	Domain	Domain description
gene_Solyc00g217960.2	Solyc00g217960.2	RING/U-box superfamily protein (AHRD V3.11 *-* tr|A0A2U1KCN8|A0A2U1KCN8_ARTAN)	24.05	24.83	17.72	13.22	9.61	11.6	22.2	11.4767	GO:0016567;GO:001602	BP:protein ubiquitination;CC:integral component of membrane;	------	------	------	------	ENOG41121N2	O:Posttranslational modification, protein turnover, chaperones	XP_010315048.1	RING-H2 finger protein ATL10-like [Solanum lycopersicum]	sp|Q9LUL6|ATL61_ARATH;	Putative RING-H2 finger protein ATL61 OS=Arabidopsis thaliana OX=3702 GN=ATL61 PE=3 SV=1;	PF13639.8;PF12678.9;PF17123.7;PF13923.8;PF13920.8;PF00097.27;PF14634.8;PF13445.8;PF12861.9;PF14447.8	zf-RING_2;zf-rbx1;zf-RING_11;zf-C3HC4_2;zf-C3HC4_3;zf-C3HC4;zf-RING_5;zf-RING_UBOX;zf-ANAPC11;Prok-RING_4	Ring finger domain;RING-H2 zinc finger domain;RING-like zinc finger;Zinc finger, C3HC4 type;Zinc finger, C3HC4 type;Zinc finger, C3HC4 type;zinc-RING finger domain;RING-type zinc-finger;Anaphase-promoting complex subunit 11 RING-H2 finger;Prokaryotic RING finger family 4
gene_Solyc01g028807.1	Solyc01g028807.1	Unknown protein	36.35	45.16	32.72	19.36	11.19	9.7	38.0767	13.4167	------	------	------	------	------	------	------	------	------	------	------	------	------	------	------
gene_Solyc01g057165.2	Solyc01g057165.2	replication protein A 70 kDa DNA-binding subunit B-like isoform X1 (AHRD V3.11 --* XP_025886291.1)	2.49	2.7	1.51	0.26	0.4	0.85	2.23333	0.503333	------	------	------	------	------	------	------	------	XP_010319453.1	uncharacterized protein LOC104646748 [Solanum lycopersicum]	------	------	------	------	------
gene_Solyc01g057840.3	Solyc01g057840.3	Nuclear export mediator factor Nemf (AHRD V3.3 *** A0A1J3J1R1_NOCCA)	3.58	3.53	3.13	1.47	1.06	1.89	3.41333	1.47333	GO:0072344;GO:1990116;GO:1990112;GO:0000049;GO:0008270;GO:0003676;GO:004302	BP:rescue of stalled ribosome;BP:ribosome-associated ubiquitin-dependent protein catabolic process;CC:RQC complex;MF:tRNA binding;MF:zinc ion binding;MF:nucleic acid binding;MF:ribosomal large subunit binding;	K24971	NEMF, RQC2	------	------	COG1293	K:Transcription	XP_004229033.1	nuclear export mediator factor Nemf [Solanum lycopersicum]	sp|Q8CCP0|NEMF_MOUSE;	Nuclear export mediator factor Nemf OS=Mus musculus OX=10090 GN=Nemf PE=1 SV=2;	PF11923.10;PF05670.15;PF00098.25	NFACT-C;NFACT-R_1;zf-CCHC	NFACT protein C-terminal domain;NFACT protein RNA binding domain;Zinc knuckle
gene_Solyc01g065510.3	Solyc01g065510.3	leucine-rich repeat extensin-like protein 6 (AHRD V3.3 *-* XP_010321602.1)	33.64	28.04	26	16.72	7.92	14.28	29.2267	12.9733	GO:001602	CC:integral component of membrane;	------	------	------	------	------	------	XP_010321602.1	leucine-rich repeat extensin-like protein 6 [Solanum lycopersicum]	------	------	------	------	------
gene_Solyc01g068250.2	Solyc01g068250.2	Transducin/WD40 repeat-like superfamily protein (AHRD V3.3 *** A0A2U1NST7_ARTAN)	4.27	4.23	5.28	2.06	1.35	2.27	4.59333	1.89333	GO:0032259;GO:0008168;GO:0016301;GO:000551	BP:methylation;MF:methyltransferase activity;MF:kinase activity;MF:protein binding;	------	------	------	------	ENOG410YAAP	S:Function unknown	XP_004229169.1	protein JINGUBANG [Solanum lycopersicum]	sp|O48716|JGB_ARATH;	Protein JINGUBANG OS=Arabidopsis thaliana OX=3702 GN=JGB PE=1 SV=1;	PF00400.34	WD40	WD domain, G-beta repeat
gene_Solyc01g068360.4	Solyc01g068360.4	Leucine-rich repeat protein kinase family protein (AHRD V3.3 *-* A0A2U1Q3K2_ARTAN)	5.86	6.46	4.45	2.8	1.92	2.24	5.59	2.32	GO:0046777;GO:0016021;GO:0005886;GO:0009506;GO:0004672;GO:000552	BP:protein autophosphorylation;CC:integral component of membrane;CC:plasma membrane;CC:plasmodesma;MF:protein kinase activity;MF:ATP binding;	------	------	------	------	ENOG410XPGM	T:Signal transduction mechanisms	XP_010320756.1	probable inactive leucine-rich repeat receptor-like protein kinase At3g03770 isoform X1 [Solanum lycopersicum]	sp|Q8LFN2|Y3037_ARATH;	Probable inactive leucine-rich repeat receptor-like protein kinase At3g03770 OS=Arabidopsis thaliana OX=3702 GN=At3g03770 PE=1 SV=1;	PF13855.8;PF12799.9	LRR_8;LRR_4	Leucine rich repeat;Leucine Rich repeats
gene_Solyc01g091490.3	Solyc01g091490.3	Unknown protein	20.29	23.82	22.58	7.53	7.65	7.57	22.23	7.58333	------	------	------	------	------	------	ENOG4111AX1;ENOG4111AIV	S:Function unknown;	TMW92152.1	hypothetical protein EJD97_013436 [Solanum chilense]	sp|F4IG60|ZPR1_ARATH;	Protein LITTLE ZIPPER 1 OS=Arabidopsis thaliana OX=3702 GN=ZPR1 PE=1 SV=1;	PF09402.12	MSC	Man1-Src1p-C-terminal domain
gene_Solyc01g091700.5	Solyc01g091700.5	F-box protein PP2-A15 (AHRD V3.11 *** tr|A0A2G3AGV7|A0A2G3AGV7_CAPAN)	9.71	12.88	17.89	5.54	4.44	7.23	13.4933	5.73667	GO:000961	BP:response to wounding;	------	------	------	------	ENOG410YE99;ENOG410Y934	S:Function unknown;	XP_004229840.1	F-box protein PP2-A13 [Solanum lycopersicum]	sp|Q9LEX0|P2A13_ARATH;	F-box protein PP2-A13 OS=Arabidopsis thaliana OX=3702 GN=PP2A13 PE=1 SV=1;	PF14299.8	PP2	Phloem protein 2
gene_Solyc01g097830.2	Solyc01g097830.2	DUF868 family protein (DUF868) (AHRD V3.3 *** Q9SI11_ARATH)	8.48	3.74	3.72	1.16	2.92	1.63	5.31333	1.90333	------	------	------	------	------	------	ENOG41115SW	S:Function unknown	XP_010312141.3	uncharacterized protein LOC104644367 [Solanum lycopersicum]	------	------	PF05910.14	DUF868	Plant protein of unknown function
gene_Solyc01g098620.2	Solyc01g098620.2	Unknown protein	10.45	9.84	6.26	4.98	3.19	3.46	8.85	3.87667	GO:001602	CC:integral component of membrane;	------	------	------	------	ENOG41119QB	S:Function unknown	TMX00237.1	hypothetical protein EJD97_001154 [Solanum chilense]	------	------	------	------	------
gene_Solyc01g106310.3	Solyc01g106310.3	Unknown protein	31.71	30.01	21.91	17.58	12.81	9.75	27.8767	13.38	GO:001602	CC:integral component of membrane;	------	------	------	------	------	------	TMX04930.1	hypothetical protein EJD97_003715 [Solanum chilense]	------	------	PF12734.9	CYSTM	Cysteine-rich TM module stress tolerance
gene_Solyc01g106910.4	Solyc01g106910.4	hypothetical protein (AHRD V3.3 *** AT4G33800.2)	11.32	16.24	11.56	5.65	4.4	5.04	13.04	5.03	GO:000969	BP:cytokinin biosynthetic process;	------	------	------	------	ENOG410Z950	S:Function unknown	XP_004230686.1	putative uncharacterized protein DDB_G0284695 [Solanum lycopersicum]	sp|Q8L9K4|SOFL5_ARATH;	Protein SOB FIVE-LIKE 5 OS=Arabidopsis thaliana OX=3702 GN=SOFL5 PE=2 SV=1;	------	------	------
gene_Solyc01g108080.4	Solyc01g108080.4	ABSCISIC ACID-INSENSITIVE 5-like protein 7 (AHRD V3.3 *** A0A2G3BV73_CAPCH)	41.19	37.49	25.18	14.48	13.38	15.51	34.62	14.4567	GO:0006355;GO:0045893;GO:0005634;GO:000370	BP:regulation of transcription, DNA-templated;BP:positive regulation of transcription, DNA-templated;CC:nucleus;MF:transcription factor activity, sequence-specific DNA binding;	K14432	ABF	map04075	Plant hormone signal transduction	ENOG410YB2M	K:Transcription	XP_004230778.1	ABSCISIC ACID-INSENSITIVE 5-like protein 7 [Solanum lycopersicum]	sp|Q9M7Q2|AI5L7_ARATH;	ABSCISIC ACID-INSENSITIVE 5-like protein 7 OS=Arabidopsis thaliana OX=3702 GN=ABF4 PE=1 SV=1;	PF00170.23;PF07716.17;PF03131.19	bZIP_1;bZIP_2;bZIP_Maf	bZIP transcription factor;Basic region leucine zipper;bZIP Maf transcription factor
gene_Solyc01g109170.3	Solyc01g109170.3	Cold-regulated plasma membrane protein 2 (AHRD V3.3 *** A0A1U8E7A7_CAPAN)	6.23	5.58	3.46	1.75	2.73	1.78	5.09	2.08667	GO:001602	CC:integral component of membrane;	------	------	------	------	ENOG4111SCF	S:Function unknown	NP_001334188.1	WCOR413-like plant cold acclimation protein [Solanum lycopersicum]	sp|Q9SVL6|CRPM2_ARATH;	Cold-regulated 413 plasma membrane protein 2 OS=Arabidopsis thaliana OX=3702 GN=COR413PM2 PE=2 SV=1;	PF05562.13	WCOR413	Cold acclimation protein WCOR413
gene_Solyc02g032940.5	Solyc02g032940.5	Aspartic proteinase (AHRD V3.11 *** tr|A0A1U8FF23|A0A1U8FF23_CAPAN)	22.2	16.35	15.28	8.32	5.65	7.87	17.9433	7.28	GO:0006629;GO:000419	BP:lipid metabolic process;MF:aspartic-type endopeptidase activity;	K08245	E3.4.23.40	------	------	ENOG410XNV7	O:Posttranslational modification, protein turnover, chaperones	KAG5620656.1	hypothetical protein H5410_005874, partial [Solanum commersonii]	sp|O04057|ASPR_CUCPE;	Aspartic proteinase OS=Cucurbita pepo OX=3663 PE=2 SV=1;	PF00026.25;PF14543.8;PF05184.17;PF03489.19	Asp;TAXi_N;SapB_1;SapB_2	Eukaryotic aspartyl protease;Xylanase inhibitor N-terminal;Saposin-like type B, region 1;Saposin-like type B, region 2
gene_Solyc02g061850.4	Solyc02g061850.4	Phospholipase D (AHRD V3.3 *** K4B675_SOLLC)	2.83	1.9	1.58	1.05	0.76	0.86	2.10333	0.89	GO:0009395;GO:0016042;GO:0046470;GO:0016020;GO:0005886;GO:0003824;GO:0070290;GO:0005509;GO:000463	BP:phospholipid catabolic process;BP:lipid catabolic process;BP:phosphatidylcholine metabolic process;CC:membrane;CC:plasma membrane;MF:catalytic activity;MF:N-acylphosphatidylethanolamine-specific phospholipase D activity;MF:calcium ion binding;MF:phospholipase D activity;	K01115	PLD1_2	map00565;map00564;map04144	Ether lipid metabolism;Glycerophospholipid metabolism;Endocytosis	COG1502	I:Lipid transport and metabolism	XP_004233571.1	phospholipase D delta-like [Solanum lycopersicum]	sp|Q9C5Y0|PLDD1_ARATH;	Phospholipase D delta OS=Arabidopsis thaliana OX=3702 GN=PLDDELTA PE=1 SV=2;	PF12357.10;PF00168.32;PF00614.24;PF13091.8	PLD_C;C2;PLDc;PLDc_2	Phospholipase D C terminal;C2 domain;Phospholipase D Active site motif;PLD-like domain
gene_Solyc02g062460.4	Solyc02g062460.4	2-oxoglutarate (2OG) and Fe(II)-dependent oxygenase superfamily protein (AHRD V3.3 *** A0A2U1LXD5_ARTAN)	6.35	4.14	3.95	0.91	1.27	0.7	4.81333	0.96	GO:0055114;GO:0031418;GO:0046872;GO:0051213;GO:001649	BP:oxidation-reduction process;MF:L-ascorbic acid binding;MF:metal ion binding;MF:dioxygenase activity;MF:oxidoreductase activity;	------	------	------	------	COG3491	S:Function unknown	XP_004233541.1	probable 2-oxoglutarate-dependent dioxygenase AOP1 [Solanum lycopersicum]	sp|Q945B6|AOP1L_ARATH;	Probable 2-oxoglutarate-dependent dioxygenase AOP1.2 OS=Arabidopsis thaliana OX=3702 GN=AOP1.2 PE=2 SV=1;	PF03171.22;PF14226.8	2OG-FeII_Oxy;DIOX_N	2OG-F;non-haem dioxygenase in morphine synthesis N-terminal
gene_Solyc02g062760.5	Solyc02g062760.5	GATA transcription factor 18-like (AHRD V3.11 *** tr|A0A2I4G7Z6|A0A2I4G7Z6_9ROSI)	3.93	4.27	4.41	2.51	0.89	1.97	4.20333	1.79	GO:0009908;GO:0003700;GO:0043565;GO:000827	BP:flower development;MF:transcription factor activity, sequence-specific DNA binding;MF:sequence-specific DNA binding;MF:zinc ion binding;	------	------	------	------	COG5641	K:Transcription	XP_004233970.1	GATA transcription factor 18-like [Solanum lycopersicum]	sp|Q8LC79|GAT18_ARATH;	GATA transcription factor 18 OS=Arabidopsis thaliana OX=3702 GN=GATA18 PE=1 SV=2;	PF00320.29	GATA	GATA zinc finger
gene_Solyc02g065550.4	Solyc02g065550.4	ACI19	15.42	15.04	15.42	6.46	5.76	7.44	15.2933	6.55333	GO:0036444;GO:0051560;GO:1990246;GO:0016021;GO:0031305;GO:0005743;GO:0015292;GO:000526	BP:calcium ion transmembrane import into mitochondrion;BP:mitochondrial calcium ion homeostasis;CC:uniplex complex;CC:integral component of membrane;CC:integral component of mitochondrial inner membrane;CC:mitochondrial inner membrane;MF:uniporter activity;MF:calcium channel activity;	K20858	MCU	------	------	ENOG410Y3YU	S:Function unknown	NP_001234771.2	ACI19 protein [Solanum lycopersicum]	sp|O64823|MCU2_ARATH;	Calcium uniporter protein 2, mitochondrial OS=Arabidopsis thaliana OX=3702 GN=At2g23790 PE=2 SV=1;	PF04678.15	MCU	Mitochondrial calcium uniporter
gene_Solyc02g067080.5	Solyc02g067080.5	UDP-glucose 6-dehydrogenase (AHRD V3.11 *** tr|Q6IVK6|Q6IVK6_TOBAC)	1.11	0.37	0.47	0.15	0.18	0	0.65	0.11	GO:0006065;GO:0006024;GO:0005829;GO:0005634;GO:0016021;GO:0051287;GO:000397	BP:UDP-glucuronate biosynthetic process;BP:glycosaminoglycan biosynthetic process;CC:cytosol;CC:nucleus;CC:integral component of membrane;MF:NAD binding;MF:UDP-glucose 6-dehydrogenase activity;	K00012	UGDH, ugd	map00520;map00040;map01250;map00053;map01240	Amino sugar and nucleotide sugar metabolism;Pentose and glucuronate interconversions;Biosynthesis of nucleotide sugars;Ascorbate and aldarate metabolism;Biosynthesis of cofactors	COG1004	M:Cell wall/membrane/envelope biogenesis	NP_001312494.1	UDP-glucose 6-dehydrogenase 3 [Nicotiana tabacum]	sp|Q96558|UGDH1_SOYBN;	UDP-glucose 6-dehydrogenase 1 OS=Glycine max OX=3847 GN=UGD1 PE=2 SV=1;	PF03721.16;PF03720.17;PF00984.21	UDPG_MGDP_dh_N;UDPG_MGDP_dh_C;UDPG_MGDP_dh	UDP-glucose/GDP-mannose dehydrogenase family, NAD binding domain;UDP-glucose/GDP-mannose dehydrogenase family, UDP binding domain;UDP-glucose/GDP-mannose dehydrogenase family, central domain
gene_Solyc02g067680.1	Solyc02g067680.1	RING/U-box superfamily protein (AHRD V3.3 *** A0A2U1N3Q0_ARTAN)	8.47	6.2	6.69	4.13	2.65	2.67	7.12	3.15	GO:0016567;GO:0016021;GO:003162	BP:protein ubiquitination;CC:integral component of membrane;MF:ubiquitin protein ligase binding;	------	------	------	------	ENOG41121N2	O:Posttranslational modification, protein turnover, chaperones	XP_004233335.1	RING-H2 finger protein ATL46 [Solanum lycopersicum]	sp|Q9FL07|ATL46_ARATH;	RING-H2 finger protein ATL46 OS=Arabidopsis thaliana OX=3702 GN=ATL46 PE=2 SV=1;	PF13639.8;PF12678.9;PF17123.7;PF00097.27;PF12861.9;PF13923.8;PF14634.8;PF13445.8	zf-RING_2;zf-rbx1;zf-RING_11;zf-C3HC4;zf-ANAPC11;zf-C3HC4_2;zf-RING_5;zf-RING_UBOX	Ring finger domain;RING-H2 zinc finger domain;RING-like zinc finger;Zinc finger, C3HC4 type;Anaphase-promoting complex subunit 11 RING-H2 finger;Zinc finger, C3HC4 type;zinc-RING finger domain;RING-type zinc-finger
gene_Solyc02g067850.2	Solyc02g067850.2	U-box domain-containing protein 4-like (AHRD V3.3 *** A0A2K3PH98_TRIPR)	6.12	6.15	4.46	3.01	1.6	2.87	5.57667	2.49333	GO:0010087;GO:0005737;GO:000563	BP:phloem or xylem histogenesis;CC:cytoplasm;CC:nucleus;	------	------	------	------	ENOG410XRTN	S:Function unknown	XP_004233921.1	U-box domain-containing protein 6 [Solanum lycopersicum]	------	------	PF00514.25;PF05536.13	Arm;Neurochondrin	Armadillo/beta-catenin-like repeat;Neurochondrin
gene_Solyc02g068040.3	Solyc02g068040.3	Unknown protein	17.38	18	12.98	6.29	11.23	9.43	16.12	8.98333	------	------	------	------	------	------	ENOG4111DV0	S:Function unknown	KAG5621769.1	hypothetical protein H5410_006987 [Solanum commersonii]	------	------	------	------	------
gene_Solyc02g069690.1	Solyc02g069690.1	FAD-binding Berberine family protein (AHRD V3.3 *** A0A1P8AT94_ARATH)	14.02	10.15	9.2	5.46	5.13	4.72	11.1233	5.10333	GO:0055114;GO:0050660;GO:0071949;GO:001649	BP:oxidation-reduction process;MF:flavin adenine dinucleotide binding;MF:FAD binding;MF:oxidoreductase activity;	K22395	K22395	map00940	Phenylpropanoid biosynthesis	ENOG4110F4M;COG0277	S:Function unknown;C:Energy production and conversion	XP_004233182.1	berberine bridge enzyme-like 15 [Solanum lycopersicum]	sp|O64743|BBE15_ARATH;	Berberine bridge enzyme-like 15 OS=Arabidopsis thaliana OX=3702 GN=MEE23 PE=1 SV=1;	PF01565.25;PF08031.14	FAD_binding_4;BBE	FAD binding domain;Berberine and berberine like
gene_Solyc02g070210.3	Solyc02g070210.3	Patellin-4 (AHRD V3.3 *** A0A2G2XDH3_CAPBA)	16.03	15.92	23.57	9.64	4.36	8.36	18.5067	7.45333	GO:0071365;GO:1901703;GO:0051301;GO:0007049;GO:0005829;GO:0005886;GO:0005634;GO:000828	BP:cellular response to auxin stimulus;BP:protein localization involved in auxin polar transport;BP:cell division;BP:cell cycle;CC:cytosol;CC:plasma membrane;CC:nucleus;MF:lipid binding;	------	------	------	------	ENOG410XRSQ	S:Function unknown	XP_004233146.1	patellin-4 [Solanum lycopersicum]	sp|Q94C59|PATL4_ARATH;	Patellin-4 OS=Arabidopsis thaliana OX=3702 GN=PATL4 PE=1 SV=2;	PF00650.22;PF03765.17	CRAL_TRIO;CRAL_TRIO_N	CRAL/TRIO domain;CRAL/TRIO, N-terminal domain
gene_Solyc02g072500.3	Solyc02g072500.3	Nucleobase-ascorbate transporter 7 (AHRD V3.3 *** A0A1U8FKB3_CAPAN)	5.69	4.98	7.02	3.04	2.04	2.81	5.89667	2.63	GO:0055085;GO:0016020;GO:0016021;GO:002285	BP:transmembrane transport;CC:membrane;CC:integral component of membrane;MF:transmembrane transporter activity;	------	------	------	------	COG2233	F:Nucleotide transport and metabolism	XP_004233030.1	nucleobase-ascorbate transporter 2 [Solanum lycopersicum]	sp|Q94C70|NAT2_ARATH;	Nucleobase-ascorbate transporter 2 OS=Arabidopsis thaliana OX=3702 GN=NAT2 PE=2 SV=2;	PF00860.22	Xan_ur_permease	Permease family
gene_Solyc02g080100.1	Solyc02g080100.1	Late embryogenesis abundant (LEA) hydroxyproline-rich glycoprotein family (AHRD V3.3 *** Q9SYB2_ARATH)	6.78	6.52	4.55	2.8	1.94	2.61	5.95	2.45	GO:0046658;GO:0016021;GO:000950	CC:anchored component of plasma membrane;CC:integral component of membrane;CC:plasmodesma;	------	------	------	------	ENOG410YH5E	S:Function unknown	XP_004233797.3	NDR1/HIN1-like protein 26 [Solanum lycopersicum]	sp|Q9FI03|NHL26_ARATH;	NDR1/HIN1-like protein 26 OS=Arabidopsis thaliana OX=3702 GN=NHL26 PE=2 SV=1;	PF03168.15	LEA_2	Late embryogenesis abundant protein
gene_Solyc02g082050.3	Solyc02g082050.3	Disease resistance protein (TIR-NBS-LRR class) (AHRD V3.3 *** A0A2K3PDT8_TRIPR)	10.34	7.48	5.27	3.43	2.82	3.42	7.69667	3.22333	GO:0006952;GO:0007165;GO:0016787;GO:004353	BP:defense response;BP:signal transduction;MF:hydrolase activity;MF:ADP binding;	------	------	------	------	COG4886	S:Function unknown	XP_004233763.1	TMV resistance protein N-like [Solanum lycopersicum]	sp|Q40392|TMVRN_NICGU;	TMV resistance protein N OS=Nicotiana glutinosa OX=35889 GN=N PE=1 SV=1;	PF01582.22;PF00931.24;PF13676.8;PF13855.8;PF12799.9;PF20160.1;PF13191.8	TIR;NB-ARC;TIR_2;LRR_8;LRR_4;C-JID;AAA_16	TIR domain;NB-ARC domain;TIR domain;Leucine rich repeat;Leucine Rich repeats;C-JID domain;AAA ATPase domain
gene_Solyc02g085190.2	Solyc02g085190.2	GATA transcription factor 19-like (AHRD V3.3 *** A0A2I4FCM7_9ROSI)	1.92	2.81	1.8	0.85	0.38	0.55	2.17667	0.593333	GO:0009908;GO:0006355;GO:0003700;GO:0043565;GO:000827	BP:flower development;BP:regulation of transcription, DNA-templated;MF:transcription factor activity, sequence-specific DNA binding;MF:sequence-specific DNA binding;MF:zinc ion binding;	------	------	------	------	COG5641	K:Transcription	XP_004233721.1	GATA transcription factor 19 [Solanum lycopersicum]	sp|Q8LC79|GAT18_ARATH;	GATA transcription factor 18 OS=Arabidopsis thaliana OX=3702 GN=GATA18 PE=1 SV=2;	PF00320.29	GATA	GATA zinc finger
gene_Solyc02g089160.3	Solyc02g089160.3	dwarf	3.22	3.31	2.48	1.47	1.17	1.53	3.00333	1.39	GO:0010268;GO:0016132;GO:0016125;GO:0007275;GO:0055114;GO:0016021;GO:0004497;GO:0020037;GO:0016705;GO:0005506;GO:001649	BP:brassinosteroid homeostasis;BP:brassinosteroid biosynthetic process;BP:sterol metabolic process;BP:multicellular organism development;BP:oxidation-reduction process;CC:integral component of membrane;MF:monooxygenase activity;MF:heme binding;MF:oxidoreductase activity, acting on paired donors, with incorporation or reduction of molecular oxygen;MF:iron ion binding;MF:oxidoreductase activity;	K09590	CYP85A1, BR6OX1	map00905	Brassinosteroid biosynthesis	COG2124	Q:Secondary metabolites biosynthesis, transport and catabolism	NP_001234263.1	6-deoxocastasterone oxidase isoform 1 [Solanum lycopersicum]	sp|Q43147|C85A1_SOLLC;	Cytochrome P450 85A1 OS=Solanum lycopersicum OX=4081 GN=CYP85A1 PE=2 SV=1;	PF00067.24	p450	Cytochrome P450
gene_Solyc02g091700.3	Solyc02g091700.3	Hydroxyproline-rich glycoprotein (AHRD V3.3 *** A0A2K3L507_TRIPR)	9.24	8.66	9.91	4.59	3.99	3.22	9.27	3.93333	GO:001602	CC:integral component of membrane;	------	------	------	------	ENOG410XWC4	S:Function unknown	XP_004231969.1	uncharacterized protein At5g65660 [Solanum lycopersicum]	sp|Q9LSK9|Y5566_ARATH;	Uncharacterized protein At5g65660 OS=Arabidopsis thaliana OX=3702 GN=At5g65660 PE=2 SV=1;	------	------	------
gene_Solyc02g092040.1	Solyc02g092040.1	Receptor-like protein kinase (AHRD V3.3 *** A0A2K3PDB7_TRIPR)	10.76	9.34	13.72	5.95	2.52	6.03	11.2733	4.83333	GO:0016021;GO:001630	CC:integral component of membrane;MF:kinase activity;	------	------	------	------	COG4886	S:Function unknown	XP_004231949.1	receptor-like protein 44 [Solanum lycopersicum]	sp|Q9M2Y3|RLP44_ARATH;	Receptor-like protein 44 OS=Arabidopsis thaliana OX=3702 GN=RLP44 PE=2 SV=1;	PF13855.8;PF12799.9	LRR_8;LRR_4	Leucine rich repeat;Leucine Rich repeats
gene_Solyc02g092930.1	Solyc02g092930.1	R2R3MYB transcription factor 44	184.39	158.35	125.85	48.84	59.03	57.6	156.197	55.1567	GO:0006355;GO:0005634;GO:0000978;GO:000098	BP:regulation of transcription, DNA-templated;CC:nucleus;MF:RNA polymerase II core promoter proximal region sequence-specific DNA binding;MF:RNA polymerase II transcription factor activity, sequence-specific DNA binding;	K09422	MYBP	------	------	COG5147	K:Transcription	XP_010315996.1	transcription factor MYB44 [Solanum lycopersicum]	sp|Q9FDW1|MYB44_ARATH;	Transcription factor MYB44 OS=Arabidopsis thaliana OX=3702 GN=MYB44 PE=1 SV=1;	PF00249.33;PF13921.8	Myb_DNA-binding;Myb_DNA-bind_6	Myb-like DNA-binding domain;Myb-like DNA-binding domain
gene_Solyc02g093890.1	Solyc02g093890.1	hypothetical protein (AHRD V3.3 *** AT5G40800.1)	1.46	1.34	0.69	0.08	0	0	1.16333	0.026667	------	------	------	------	------	------	ENOG4111DV0	S:Function unknown	XP_019067617.1	uncharacterized protein LOC104645665 [Solanum lycopersicum]	------	------	------	------	------
gene_Solyc03g005980.3	Solyc03g005980.3	NOD26-like intrinsic protein 1.1	1.44	1.35	1.32	0.54	0.28	0.51	1.37	0.443333	GO:0055085;GO:0016020;GO:0016021;GO:001526	BP:transmembrane transport;CC:membrane;CC:integral component of membrane;MF:channel activity;	K09874	NIP	------	------	COG0580	G:Carbohydrate transport and metabolism	XP_004234073.1	aquaporin NIP1-1 [Solanum lycopersicum]	sp|Q40746|NIP11_ORYSJ;	Aquaporin NIP1-1 OS=Oryza sativa subsp. japonica OX=39947 GN=NIP1-1 PE=2 SV=1;	PF00230.22	MIP	Major intrinsic protein
gene_Solyc03g006880.3	Solyc03g006880.3	gibberellin 20-oxidase-1	5.57	5.38	6.44	2.87	1.46	2.24	5.79667	2.19	GO:0009826;GO:0009686;GO:0009416;GO:0009908;GO:0055114;GO:0031418;GO:0051213;GO:0045544;GO:0046872;GO:001649	BP:unidimensional cell growth;BP:gibberellin biosynthetic process;BP:response to light stimulus;BP:flower development;BP:oxidation-reduction process;MF:L-ascorbic acid binding;MF:dioxygenase activity;MF:gibberellin 20-oxidase activity;MF:metal ion binding;MF:oxidoreductase activity;	K05282	GA20ox	map00904	Diterpenoid biosynthesis	COG3491	S:Function unknown	NP_001234070.1	gibberellin 20-oxidase-1 [Solanum lycopersicum]	sp|Q39110|GAOX1_ARATH;	Gibberellin 20 oxidase 1 OS=Arabidopsis thaliana OX=3702 GN=GA20OX1 PE=2 SV=2;	PF03171.22;PF14226.8	2OG-FeII_Oxy;DIOX_N	2OG-F;non-haem dioxygenase in morphine synthesis N-terminal
gene_Solyc03g007230.4	Solyc03g007230.4	Protein phosphatase 2C (AHRD V3.3 *** A0A2U1KYU0_ARTAN)	55.38	50.74	37.47	17.1	14.51	25.08	47.8633	18.8967	GO:0005829;GO:0005634;GO:0106306;GO:0106307;GO:0003824;GO:004687	CC:cytosol;CC:nucleus;CC:old GO;CC:old GO;MF:catalytic activity;MF:metal ion binding;	K14497	PP2C	map04016;map04075	MAPK signaling pathway - plant;Plant hormone signal transduction	COG0631	T:Signal transduction mechanisms	XP_010317471.1	protein phosphatase 2C 51-like [Solanum lycopersicum]	sp|Q65XK7|P2C51_ORYSJ;	Protein phosphatase 2C 51 OS=Oryza sativa subsp. japonica OX=39947 GN=PP2C51 PE=1 SV=1;	PF00481.23	PP2C	Protein phosphatase 2C
gene_Solyc03g031890.3	Solyc03g031890.3	Cold induced protein-like (AHRD V3.3 *-* Q94JH8_ORYSJ)	24.27	27.31	31.11	11.62	7.69	12.41	27.5633	10.5733	------	------	------	------	------	------	ENOG41117CQ	S:Function unknown	XP_004234493.1	uncharacterized protein LOC101258531 [Solanum lycopersicum]	------	------	PF12232.10	Myf5	Myogenic determination factor 5
gene_Solyc03g093110.3	Solyc03g093110.3	Xyloglucan endotransglucosylase/hydrolase (AHRD V3.3 *** Q6RHY0_SOLLC)	26.32	22.34	28.44	8.71	12.77	9.29	25.7	10.2567	GO:0042546;GO:0005975;GO:0071555;GO:0010411;GO:0005618;GO:0048046;GO:0016762;GO:000455	BP:cell wall biogenesis;BP:carbohydrate metabolic process;BP:cell wall organization;BP:xyloglucan metabolic process;CC:cell wall;CC:apoplast;MF:xylogluca;MF:hydrolase activity, hydrolyzing O-glycosyl compounds;	K14504;K08235	TCH4;E2.4.1.207	map04075	Plant hormone signal transduction	COG2273	G:Carbohydrate transport and metabolism	XP_004235157.1	probable xyloglucan endotransglucosylase/hydrolase protein 23 [Solanum lycopersicum]	sp|Q38910|XTH23_ARATH;	Probable xyloglucan endotransglucosylase/hydrolase protein 23 OS=Arabidopsis thaliana OX=3702 GN=XTH23 PE=2 SV=1;	PF00722.23;PF06955.14;PF13385.8	Glyco_hydro_16;XET_C;Laminin_G_3	Glycosyl hydrolases family 16;Xyloglucan endo-transglycosylase;Concanavalin A-like lectin/glucanases superfamily
gene_Solyc03g093120.5.1	Solyc03g093120.5.1	Xyloglucan endotransglucosylase/hydrolase (AHRD V3.3 *** Q6RHY0_SOLLC)	11.53	10.58	12.52	3.89	5.15	4.62	11.5433	4.55333	GO:0042546;GO:0005975;GO:0071555;GO:0010411;GO:0005618;GO:0048046;GO:0016762;GO:000455	BP:cell wall biogenesis;BP:carbohydrate metabolic process;BP:cell wall organization;BP:xyloglucan metabolic process;CC:cell wall;CC:apoplast;MF:xylogluca;MF:hydrolase activity, hydrolyzing O-glycosyl compounds;	K14504;K08235	TCH4;E2.4.1.207	map04075	Plant hormone signal transduction	COG2273	G:Carbohydrate transport and metabolism	XP_004235158.1	probable xyloglucan endotransglucosylase/hydrolase protein 23 [Solanum lycopersicum]	sp|Q38910|XTH23_ARATH;	Probable xyloglucan endotransglucosylase/hydrolase protein 23 OS=Arabidopsis thaliana OX=3702 GN=XTH23 PE=2 SV=1;	PF00722.23;PF06955.14	Glyco_hydro_16;XET_C	Glycosyl hydrolases family 16;Xyloglucan endo-transglycosylase
gene_Solyc03g112750.4	Solyc03g112750.4	protein TORNADO.1	2.87	1.68	1.4	0.54	0.77	0.55	1.98333	0.62	GO:0005515;GO:000016	MF:protein binding;MF:nucleotide binding;	------	------	------	------	ENOG4111F3H	S:Function unknown	NP_001289839.1	protein TORNADO 1 [Solanum lycopersicum]	sp|Q9FJ57|TRN1_ARATH;	Protein TORNADO 1 OS=Arabidopsis thaliana OX=3702 GN=TRN1 PE=2 SV=1;	PF16095.7;PF13516.8;PF08477.15	COR;LRR_6;Roc	C-terminal of Roc, COR, domain;Leucine Rich repeat;Ras of Complex, Roc, domain of DAPkinase
gene_Solyc03g120170.1	Solyc03g120170.1	Protein kinase, catalytic domain-containing protein (AHRD V3.3 -** A0A2U1L8L5_ARTAN)	13.38	13.1	20.71	8.66	8.49	10.35	15.73	9.16667	------	------	------	------	------	------	ENOG410Z3AX	S:Function unknown	KAG5619066.1	hypothetical protein H5410_018890 [Solanum commersonii]	------	------	------	------	------
gene_Solyc03g123400.1	Solyc03g123400.1	GRAS16	2.52	2.25	1.17	0.6	0.88	0.63	1.98	0.703333	GO:0042446;GO:0006355;GO:2000032;GO:0005634;GO:0043565;GO:000370	BP:hormone biosynthetic process;BP:regulation of transcription, DNA-templated;BP:regulation of secondary shoot formation;CC:nucleus;MF:sequence-specific DNA binding;MF:transcription factor activity, sequence-specific DNA binding;	------	------	------	------	ENOG4111HIA	S:Function unknown	XP_004235543.1	nodulation-signaling pathway 1 protein [Solanum lycopersicum]	sp|Q4VYC8|NSP1_MEDTR;	Protein NODULATION SIGNALING PATHWAY 1 OS=Medicago truncatula OX=3880 GN=NSP1 PE=1 SV=1;	PF03514.16	GRAS	GRAS domain family
gene_Solyc04g006960.3	Solyc04g006960.3	ABC transporter-like (AHRD V3.3 *** A0A200QID3_9MAGN)	14.39	13.27	10.4	4.62	4.27	4.61	12.6867	4.5	GO:0016020;GO:0016021;GO:0042626;GO:000552	CC:membrane;CC:integral component of membrane;MF:ATPase activity, coupled to transmembrane movement of substances;MF:ATP binding;	K05681	ABCG2, CD338	map02010	ABC transporters	COG1131	V:Defense mechanisms	XP_004236984.1	ABC transporter G family member 21 [Solanum lycopersicum]	sp|Q7XA72|AB21G_ARATH;	ABC transporter G family member 21 OS=Arabidopsis thaliana OX=3702 GN=ABCG21 PE=2 SV=2;	PF01061.26;PF00005.29;PF19055.2;PF12698.9;PF13191.8	ABC2_membrane;ABC_tran;ABC2_membrane_7;ABC2_membrane_3;AAA_16	ABC-2 type transporter;ABC transporter;ABC-2 type transporter;ABC-2 family transporter protein;AAA ATPase domain
gene_Solyc04g011770.2	Solyc04g011770.2	Unknown protein	4.69	4.06	2.86	0.8	1.99	1.55	3.87	1.44667	------	------	------	------	------	------	------	------	XP_004236723.1	uncharacterized protein LOC101253579 [Solanum lycopersicum]	------	------	------	------	------
gene_Solyc04g019313.1	Solyc04g019313.1	UPF04.1	1.11	0.8	0.75	0.12	0	0.38	0.886667	0.166667	GO:001602	CC:integral component of membrane;	------	------	------	------	------	------	XP_015073062.1	UPF0481 protein At3g47200-like [Solanum pennellii]	sp|P0C897|Y3264_ARATH;	Putative UPF0481 protein At3g02645 OS=Arabidopsis thaliana OX=3702 GN=At3g02645 PE=3 SV=1;	PF03140.17	DUF247	Plant protein of unknown function
gene_Solyc04g050407.1	Solyc04g050407.1	60S ribosomal protein l12-like (AHRD V3.3 *** A0A2K3K598_TRIPR)	22.22	22.91	31.54	13.13	7.55	17.71	25.5567	12.7967	GO:0006412;GO:0015934;GO:0005840;GO:0022625;GO:0016021;GO:0070180;GO:000373	BP:translation;CC:large ribosomal subunit;CC:ribosome;CC:cytosolic large ribosomal subunit;CC:integral component of membrane;MF:large ribosomal subunit rRNA binding;MF:structural constituent of ribosome;	K02870	RP-L12e, RPL12	map03010	Ribosome	COG0080	J:Translation, ribosomal structure and biogenesis	XP_015072639.1	60S ribosomal protein L12-3-like [Solanum pennellii]	sp|P50883|RL121_ARATH;	60S ribosomal protein L12-1 OS=Arabidopsis thaliana OX=3702 GN=RPL12A PE=2 SV=2;	------	------	------
gene_Solyc04g074730.1	Solyc04g074730.1	classical arabinogalactan protein 5 (AHRD V3.3 --* XP_004237948.1)	144.9	119.55	112.97	84.64	37.53	58.38	125.807	60.1833	------	------	------	------	------	------	------	------	XP_004237948.1	classical arabinogalactan protein 5 [Solanum lycopersicum]	------	------	------	------	------
gene_Solyc04g076630.3	Solyc04g076630.3	Rhamnogalacturonate lyase (AHRD V3.3 *** A0A200QXQ6_9MAGN)	8.26	5.07	3.83	2.59	2.61	2.43	5.72	2.54333	GO:0005975;GO:0005576;GO:0030246;GO:010221	BP:carbohydrate metabolic process;CC:extracellular region;MF:carbohydrate binding;MF:rhamnogalacturonan endolyase activity;	K18195	RGL4, rhiE	------	------	ENOG410YE12	S:Function unknown	XP_004238020.1	probable rhamnogalacturonate lyase B isoform X1 [Solanum lycopersicum]	sp|Q8RJP2|RHIE_DICD3;	Rhamnogalacturonate lyase OS=Dickeya dadantii;	PF06045.13;PF14683.8;PF14686.8	Rhamnogal_lyase;CBM-like;fn3_3	Rhamnogalacturonate lyase family;Polysaccharide lyase family 4, domain III;Polysaccharide lyase family 4, domain II
gene_Solyc04g079360.1	Solyc04g079360.1	R2R3MYB transcription factor 77	7.38	7.95	7.32	1.79	1.13	3.86	7.55	2.26	GO:0006355;GO:0005634;GO:0000978;GO:000098	BP:regulation of transcription, DNA-templated;CC:nucleus;MF:RNA polymerase II core promoter proximal region sequence-specific DNA binding;MF:RNA polymerase II transcription factor activity, sequence-specific DNA binding;	------	------	------	------	COG5147	K:Transcription	XP_004238184.1	transcription factor MYB44-like [Solanum lycopersicum]	sp|Q9SN12|MYB77_ARATH;	Transcription factor MYB77 OS=Arabidopsis thaliana OX=3702 GN=MYB77 PE=1 SV=1;	PF00249.33;PF13921.8	Myb_DNA-binding;Myb_DNA-bind_6	Myb-like DNA-binding domain;Myb-like DNA-binding domain
gene_Solyc04g081020.3	Solyc04g081020.3	B-box zinc finger protein 24 (AHRD V3.3 *** A0A2G3CQV9_CAPCH)	1.14	1.91	2.05	0.27	0.56	0.44	1.7	0.423333	GO:0006355;GO:0009640;GO:0005634;GO:0008270;GO:000367	BP:regulation of transcription, DNA-templated;BP:photomorphogenesis;CC:nucleus;MF:zinc ion binding;MF:nucleic acid binding;	------	------	------	------	ENOG410YIAM	S:Function unknown	XP_004238317.1	B-box zinc finger protein 21 [Solanum lycopersicum]	sp|Q9LQZ7|BBX21_ARATH;	B-box zinc finger protein 21 OS=Arabidopsis thaliana OX=3702 GN=BBX21 PE=1 SV=1;	PF00643.26;PF16366.7	zf-B_box;CEBP_ZZ	B-box zinc finger;Cytoplasmic polyadenylation element-binding protein ZZ domain
gene_Solyc05g006670.2	Solyc05g006670.2	Leucine-rich repeat receptor protein kinase family protein (AHRD V3.3 *-* A0A061E5L2_THECC)	0.46	0.61	0.73	0.09	0.04	0.25	0.6	0.126667	GO:0005886;GO:0016301;GO:000551	CC:plasma membrane;MF:kinase activity;MF:protein binding;	------	------	------	------	COG4886	S:Function unknown	XP_004239368.1	LRR receptor-like serine/threonine-protein kinase FLS2 [Solanum lycopersicum]	sp|Q6JN46|EIX2_SOLLC;	Receptor-like protein EIX2 OS=Solanum lycopersicum OX=4081 GN=EIX2 PE=1 SV=2;	PF13855.8;PF12799.9	LRR_8;LRR_4	Leucine rich repeat;Leucine Rich repeats
gene_Solyc05g006980.3	Solyc05g006980.3	Homeobox-leucine zipper protein HOX16 (AHRD V3.3 *** A0A1U8EXU3_CAPAN)	29.09	33.42	24.4	15.11	9.91	13.07	28.97	12.6967	GO:0045893;GO:0005634;GO:0043565;GO:0000981;GO:000367	BP:positive regulation of transcription, DNA-templated;CC:nucleus;MF:sequence-specific DNA binding;MF:RNA polymerase II transcription factor activity, sequence-specific DNA binding;MF:DNA binding;	K09338	HD-ZIP	------	------	ENOG410Z2UE	K:Transcription	XP_004238764.1	homeobox-leucine zipper protein HAT5 [Solanum lycopersicum]	sp|Q02283|HAT5_ARATH;	Homeobox-leucine zipper protein HAT5 OS=Arabidopsis thaliana OX=3702 GN=HAT5 PE=1 SV=1;	PF02183.20;PF00046.31;PF05920.13	HALZ;Homeodomain;Homeobox_KN	Homeobox associated leucine zipper;Homeodomain;Homeobox KN domain
gene_Solyc05g007300.3	Solyc05g007300.3	HVA22-like protein (AHRD V3.3 *** A0A1U8EJU9_CAPAN)	6.01	5.75	4.52	0.96	2.29	0.62	5.42667	1.29	GO:0009737;GO:0042538;GO:0009414;GO:0016021;GO:000950	BP:response to abscisic acid;BP:hyperosmotic salinity response;BP:response to water deprivation;CC:integral component of membrane;CC:plasmodesma;	K17279	REEP5_6	------	------	COG5052	U:Intracellular trafficking, secretion, and vesicular transport	XP_004238789.1	HVA22-like protein c isoform X2 [Solanum lycopersicum]	sp|Q9S784|HA22C_ARATH;	HVA22-like protein c OS=Arabidopsis thaliana OX=3702 GN=HVA22C PE=2 SV=1;	PF03134.21	TB2_DP1_HVA22	TB2/DP1, HVA22 family
gene_Solyc05g009460.3	Solyc05g009460.3	ethylene-responsive transcription factor ERF118-like (AHRD V3.3 --* XP_022968247.1)	19.83	19.37	26.36	9.87	7.84	9.4	21.8533	9.03667	GO:0006952;GO:0009873;GO:0005634;GO:0003700;GO:000367	BP:defense response;BP:ethylene-activated signaling pathway;CC:nucleus;MF:transcription factor activity, sequence-specific DNA binding;MF:DNA binding;	------	------	------	------	ENOG410Z04J;ENOG41119ED	K:Transcription;S:Function unknown	XP_004238935.1	ethylene-responsive transcription factor ERF118 [Solanum lycopersicum]	sp|Q9CA27|EF118_ARATH;	Ethylene-responsive transcription factor ERF118 OS=Arabidopsis thaliana OX=3702 GN=ERF118 PE=1 SV=1;	------	------	------
gene_Solyc05g012670.2	Solyc05g012670.2	Glycosyltransferase (AHRD V3.3 *** A0A288W8G2_GARJA)	3.15	3	2.14	1.4	1.17	1.01	2.76333	1.19333	GO:000819	MF:UDP-glycosyltransferase activity;	K13495	CISZOG	map00908	Zeatin biosynthesis	COG1819	S:Function unknown	XP_004239467.1	zeatin O-glucosyltransferase-like [Solanum lycopersicum]	sp|Q9ZSK5|ZOG_PHALU;	Zeatin O-glucosyltransferase OS=Phaseolus lunatus OX=3884 GN=ZOG1 PE=2 SV=1;	PF00201.20	UDPGT	UDP-glucoronosyl and UDP-glucosyl transferase
gene_Solyc05g013760.4	Solyc05g013760.4	Proline-rich receptor-like kinase (AHRD V3.3 *-* A0A1I9LPJ0_ARATH)	3.08	3.64	2.41	1.89	0.84	1.12	3.04333	1.28333	GO:001602	CC:integral component of membrane;	------	------	------	------	ENOG410YM2N	S:Function unknown	TMW84116.1	hypothetical protein EJD97_025772 [Solanum chilense]	------	------	PF03168.15	LEA_2	Late embryogenesis abundant protein
gene_Solyc05g014120.1	Solyc05g014120.1	S-adenosyl-L-methionine-dependent methyltransferases superfamily protein (AHRD V3.3 *** A0A2U1MVU3_ARTAN)	5.11	6.91	5.21	3.09	2.45	3.06	5.74333	2.86667	GO:0016021;GO:000816	CC:integral component of membrane;MF:methyltransferase activity;	------	------	------	------	ENOG410Y3ER	S:Function unknown	XP_004239166.1	uncharacterized protein LOC101254202 [Solanum lycopersicum]	------	------	PF08241.14	Methyltransf_11	Methyltransferase domain
gene_Solyc05g014175.1	Solyc05g014175.1	Unknown protein	4.73	4.62	7.69	2.02	2.24	2.95	5.68	2.40333	------	------	------	------	------	------	------	------	KAG5604861.1	hypothetical protein H5410_026353 [Solanum commersonii]	------	------	------	------	------
gene_Solyc05g047560.1	Solyc05g047560.1	Glycosyltransferase (AHRD V3.3 *** F4KHR9_ARATH)	2.44	3.38	3.37	1.92	0.65	1.31	3.06333	1.29333	GO:0016021;GO:001675	CC:integral component of membrane;MF:transferase activity, transferring glycosyl groups;	------	------	------	------	COG0438	M:Cell wall/membrane/envelope biogenesis	XP_004240120.3	uncharacterized protein LOC101262314 [Solanum lycopersicum]	sp|C7Q4Y6|MSHA1_CATAD;	D-inositol 3-phosphate glycosyltransferase 1 OS=Catenulispora acidiphila;	PF13439.8;PF00534.22;PF13692.8;PF13579.8	Glyco_transf_4;Glycos_transf_1;Glyco_trans_1_4;Glyco_trans_4_4	Glycosyltransferase Family 4;Glycosyl transferases group 1;Glycosyl transferases group 1;Glycosyl transferase 4-like domain
gene_Solyc05g051270.3	Solyc05g051270.3	Cysteine-rich repeat secretory protein 60 (AHRD V3.3 *** A0A2G2VDA1_CAPBA)	8.6	9.72	8.83	3.34	2.97	3.69	9.05	3.33333	GO:0016021;GO:000950	CC:integral component of membrane;CC:plasmodesma;	------	------	------	------	ENOG410YCA0	U:Intracellular trafficking, secretion, and vesicular transport	XP_004240260.1	cysteine-rich repeat secretory protein 60-like [Solanum lycopersicum]	sp|Q0WPN8|PDLP7_ARATH;	Plasmodesmata-located protein 7 OS=Arabidopsis thaliana OX=3702 GN=PDLP7 PE=1 SV=1;	PF01657.19	Stress-antifung	Salt stress response/antifungal
gene_Solyc05g054090.3	Solyc05g054090.3	induced stolen tip protein TUB8-like (AHRD V3.3 *** XP_004239829.1)	14.16	23.64	32.67	11.03	4.2	7.49	23.49	7.57333	------	------	------	------	------	------	------	------	XP_004239829.1	induced stolen tip protein TUB8-like [Solanum lycopersicum]	------	------	------	------	------
gene_Solyc05g056500.1	Solyc05g056500.1	RING-type E3 ubiquitin transferase (AHRD V3.3 *** A0A2G2VD56_CAPBA)	3.65	2.14	2.69	1.33	0.46	0.97	2.82667	0.92	GO:0016567;GO:000484	BP:protein ubiquitination;MF:ubiquitin-protein transferase activity;	------	------	------	------	ENOG410YFJY	S:Function unknown	XP_004240176.2	U-box domain-containing protein 26-like [Solanum lycopersicum]	sp|Q9FXA4|PUB26_ARATH;	U-box domain-containing protein 26 OS=Arabidopsis thaliana OX=3702 GN=PUB26 PE=2 SV=1;	PF04564.17;PF11789.10	U-box;zf-Nse	U-box domain;Zinc-finger of the MIZ type in Nse subunit
gene_Solyc06g005130.3	Solyc06g005130.3	Dof zinc finger protein (AHRD V3.3 *** A0A2K3LIE4_TRIPR)	9.34	10.59	7.98	3.03	5	4.51	9.30333	4.18	GO:0006355;GO:0005634;GO:000367	BP:regulation of transcription, DNA-templated;CC:nucleus;MF:DNA binding;	------	------	------	------	ENOG410YM1Y	S:Function unknown	XP_004240603.1	dof zinc finger protein DOF2.1-like [Solanum lycopersicum]	sp|Q8LE43|DOF21_ARATH;	Dof zinc finger protein DOF2.1 OS=Arabidopsis thaliana OX=3702 GN=DOF2.1 PE=2 SV=2;	PF02701.17	zf-Dof	Dof domain, zinc finger
gene_Solyc06g048930.5	Solyc06g048930.5	Two-component response regulator ARR6 (AHRD V3.11 *-* tr|A0A2G2WI63|A0A2G2WI63_CAPBA)	2.03	1.51	1.61	0.98	0.62	0.54	1.71667	0.713333	GO:000016	BP:phosphorelay signal transduction system;	K14492	ARR-A	map04075	Plant hormone signal transduction	COG5641;COG3706	K:Transcription;T:Signal transduction mechanisms	PHT78251.1	Two-component response regulator ARR6 [Capsicum annuum]	sp|Q9FPR6|ARR17_ARATH;	Two-component response regulator ARR17 OS=Arabidopsis thaliana OX=3702 GN=ARR17 PE=2 SV=1;	PF00072.26	Response_reg	Response regulator receiver domain
gene_Solyc06g066290.3	Solyc06g066290.3	cystic fibrosis transmembrane conductance regulator (AHRD V3.3 *** AT2G35585.1)	5.32	4.99	3.84	2.09	1.82	2.57	4.71667	2.16	------	------	------	------	------	------	ENOG410Y8EK	S:Function unknown	XP_004241761.1	uncharacterized protein LOC101257272 [Solanum lycopersicum]	------	------	------	------	------
gene_Solyc06g067950.3	Solyc06g067950.3	Alpha/beta-Hydrolases superfamily protein (AHRD V3.3 *** A0A2U1Q9V2_ARTAN)	8.38	6.17	8.73	4.12	2.34	3.19	7.76	3.21667	GO:0009820;GO:001678	BP:alkaloid metabolic process;MF:hydrolase activity;	K06130	LYPLA2	map00564	Glycerophospholipid metabolism	COG0400	S:Function unknown	XP_010322678.2	acyl-protein thioesterase 2-like isoform X1 [Solanum lycopersicum]	sp|Q9WTL7|LYPA2_MOUSE;	Acyl-protein thioesterase 2 OS=Mus musculus OX=10090 GN=Lypla2 PE=1 SV=1;	PF02230.18;PF03959.15;PF12146.10;PF12697.9	Abhydrolase_2;FSH1;Hydrolase_4;Abhydrolase_6	Phospholipase/Carboxylesterase;Serine hydrolase;Serine aminopeptidase, S33;Alpha/beta hydrolase family
gene_Solyc06g068360.3	Solyc06g068360.3	Ethylene-responsive transcription factor (AHRD V3.3 *** A0A2G2WLG1_CAPBA)	6.51	6.18	5.57	2.35	1.61	3.26	6.08667	2.40667	GO:0006952;GO:0006355;GO:0009873;GO:0005634;GO:0003700;GO:000367	BP:defense response;BP:regulation of transcription, DNA-templated;BP:ethylene-activated signaling pathway;CC:nucleus;MF:transcription factor activity, sequence-specific DNA binding;MF:DNA binding;	------	------	------	------	ENOG4111RRZ	K:Transcription	XP_004242199.1	ethylene-responsive transcription factor ERF003-like [Solanum lycopersicum]	sp|Q94AW5|ERF03_ARATH;	Ethylene-responsive transcription factor ERF003 OS=Arabidopsis thaliana OX=3702 GN=ERF003 PE=1 SV=1;	PF00847.22	AP2	AP2 domain
gene_Solyc06g071540.3	Solyc06g071540.3	transmembrane protein (AHRD V3.3 *** AT1G10660.4)	10.52	6.9	7.85	3.81	4.22	3.5	8.42333	3.84333	GO:0016021;GO:001602	CC:integral component of membrane;CC:membrane;	------	------	------	------	ENOG41123NR;ENOG410YBEC	S:Function unknown;	XP_004241519.1	uncharacterized protein LOC101260442 [Solanum lycopersicum]	------	------	------	------	------
gene_Solyc06g073710.5	Solyc06g073710.5	glucan endo-1,3-beta-glucosidase 14-like (AHRD V3.11 *** tr|A0A2I4FFF8|A0A2I4FFF8_9ROSI)	2.21	2.1	1.86	1.12	0.96	0.76	2.05667	0.946667	GO:0006952;GO:0005975;GO:0046658;GO:000455	BP:defense response;BP:carbohydrate metabolic process;CC:anchored component of plasma membrane;MF:hydrolase activity, hydrolyzing O-glycosyl compounds;	------	------	------	------	ENOG410YEZD	G:Carbohydrate transport and metabolism	XP_010322455.1	glucan endo-1,3-beta-glucosidase 14 [Solanum lycopersicum]	sp|Q9ZQG9|E1314_ARATH;	Glucan endo-1,3-beta-glucosidase 14 OS=Arabidopsis thaliana OX=3702 GN=At2g27500 PE=2 SV=2;	PF00332.20	Glyco_hydro_17	Glycosyl hydrolases family 17
gene_Solyc06g074750.1	Solyc06g074750.1	Histone H2B (AHRD V3.3 *-* A0A200R5C1_9MAGN)	3.81	2.51	2.23	0.56	0.85	0.94	2.85	0.783333	GO:0006334;GO:0000786;GO:0005634;GO:0046982;GO:000367	BP:nucleosome assembly;CC:nucleosome;CC:nucleus;MF:protein heterodimerization activity;MF:DNA binding;	K11252	H2B	------	------	ENOG4111NV5	B:Chromatin structure and dynamics	XP_004241294.1	histone H2B.1-like [Solanum lycopersicum]	sp|Q9SGE3|H2B2_ARATH;	Histone H2B.2 OS=Arabidopsis thaliana OX=3702 GN=At1g08170 PE=2 SV=1;	PF00125.26;PF00808.25	Histone;CBFD_NFYB_HMF	Core histone H2A/H2B/H3/H4;Histone-like transcription factor
gene_Solyc06g074850.3	Solyc06g074850.3	Carboxypeptidase (AHRD V3.3 *** A0A2G3CAN0_CAPCH)	30.86	27.54	21.49	13.35	9.44	13.54	26.63	12.11	GO:0006508;GO:0005773;GO:0005576;GO:000418	BP:proteolysis;CC:vacuole;CC:extracellular region;MF:serine-type carboxypeptidase activity;	K16298	SCPL-IV	------	------	COG2939	E:Amino acid transport and metabolism	XP_004241292.1	serine carboxypeptidase-like [Solanum lycopersicum]	sp|P21529|CBP3_HORVU;	Serine carboxypeptidase 3 OS=Hordeum vulgare OX=4513 GN=CBP3 PE=1 SV=2;	PF00450.24	Peptidase_S10	Serine carboxypeptidase
gene_Solyc06g075280.3	Solyc06g075280.3	vicilin-like seed storage protein isoform .1	0.86	0.81	0.83	0.36	0.14	0.04	0.833333	0.18	GO:004573	MF:nutrient reservoir activity;	------	------	------	------	ENOG4111FD7	S:Function unknown	XP_004242091.1	vicilin-like seed storage protein At2g28490 [Solanum lycopersicum]	sp|Q9SK09|VCL22_ARATH;	Vicilin-like seed storage protein At2g28490 OS=Arabidopsis thaliana OX=3702 GN=At2g28490 PE=2 SV=1;	PF00190.24;PF07883.13	Cupin_1;Cupin_2	Cupin;Cupin domain
gene_Solyc06g076680.5	Solyc06g076680.5	Thioesterase superfamily (AHRD V3.11 *** tr|A0A200R4R0|A0A200R4R0_9MAGN)	7.03	6.34	4.68	2.56	2.87	2.28	6.01667	2.57	GO:0005777;GO:0047617;GO:000372	CC:peroxisome;MF:acyl-CoA hydrolase activity;MF:RNA binding;	K17362	ACOT13	------	------	COG2050;ENOG4111WRB	Q:Secondary metabolites biosynthesis, transport and catabolism;S:Function unknown	XP_004241184.1	acyl-coenzyme A thioesterase 13-like [Solanum lycopersicum]	sp|Q84TH4|SR45A_ARATH;	Serine/arginine-rich splicing factor SR45a OS=Arabidopsis thaliana OX=3702 GN=SR45A PE=1 SV=1;	PF03061.24	4HBT	Thioesterase superfamily
gene_Solyc06g084070.3	Solyc06g084070.3	auxin-regulated IAA2	2.64	2.48	3.13	0.7	0.67	1.29	2.75	0.886667	GO:0006355;GO:0009734;GO:000563	BP:regulation of transcription, DNA-templated;BP:auxin-activated signaling pathway;CC:nucleus;	K14484	IAA	map04075	Plant hormone signal transduction	ENOG41106Y9;ENOG410YIDV	K:Transcription;	NP_001266042.1	auxin-responsive protein IAA2 [Solanum lycopersicum]	sp|O24542|AX22D_VIGRR;	Auxin-induced protein 22D OS=Vigna radiata var. radiata OX=3916 GN=AUX22D PE=2 SV=1;	PF02309.18	AUX_IAA	AUX/IAA family
gene_Solyc07g017530.4	Solyc07g017530.4	Conserved oligomeric Golgi complex subunit 3 (AHRD V3.3 *-* A0A1J3I1P6_NOCCA)	3.4	2.27	2.56	0	0	0	2.74333	0	GO:0007030;GO:0009860;GO:0048193;GO:0006886;GO:0006891;GO:0017119;GO:0005801;GO:0016020;GO:0005829;GO:004280	BP:Golgi organization;BP:pollen tube growth;BP:Golgi vesicle transport;BP:intracellular protein transport;BP:intra-Golgi vesicle-mediated transport;CC:Golgi transport complex;CC:cis-Golgi network;CC:membrane;CC:cytosol;MF:protein homodimerization activity;	K20290	COG3, SEC34	------	------	ENOG410XNXH	U:Intracellular trafficking, secretion, and vesicular transport	KAG5594600.1	hypothetical protein H5410_035832 [Solanum commersonii]	sp|F4HQ84|COG3_ARATH;	Conserved oligomeric Golgi complex subunit 3 OS=Arabidopsis thaliana OX=3702 GN=COG3 PE=1 SV=1;	PF04136.17	Sec34	Sec34-like family
gene_Solyc07g045140.4	Solyc07g045140.4	transmembrane protein (AHRD V3.3 *** AT4G12680.1)	3.08	3.85	3.3	1.2	0.96	1.44	3.41	1.2	GO:0010228;GO:001602	BP:vegetative to reproductive phase transition of meristem;CC:integral component of membrane;	------	------	------	------	ENOG410YG75	S:Function unknown	XP_004243604.1	uncharacterized membrane protein At3g27390 [Solanum lycopersicum]	sp|Q8GUM4|Y3739_ARATH;	Uncharacterized membrane protein At3g27390 OS=Arabidopsis thaliana OX=3702 GN=At3g27390 PE=1 SV=2;	------	------	------
gene_Solyc07g049390.3	Solyc07g049390.3	ARM repeat superfamily protein (AHRD V3.3 *** Q8S8G1_ARATH)	1.19	1.73	1.93	0.49	0	0	1.61667	0.163333	GO:0016021;GO:0005741;GO:0000221;GO:004696	CC:integral component of membrane;CC:mitochondrial outer membrane;CC:vacuolar proton-transporting V-type ATPase, V1 domain;MF:proton-transporting ATPase activity, rotational mechanism;	------	------	------	------	ENOG410XRTN	S:Function unknown	XP_004243513.1	protein CELLULOSE SYNTHASE INTERACTIVE 1 [Solanum lycopersicum]	------	------	PF00514.25;PF04826.15;PF03224.16	Arm;Arm_2;V-ATPase_H_N	Armadillo/beta-catenin-like repeat;Armadillo-like;V-ATPase subunit H
gene_Solyc07g055560.4	Solyc07g055560.4	Cytochrome (AHRD V3.3 *** A0A2G3C1F9_CAPCH)	5.29	2.58	3.25	0.88	1.45	1.21	3.70667	1.18	GO:0055114;GO:0016021;GO:0004497;GO:0020037;GO:0016705;GO:000550	BP:oxidation-reduction process;CC:integral component of membrane;MF:monooxygenase activity;MF:heme binding;MF:oxidoreductase activity, acting on paired donors, with incorporation or reduction of molecular oxygen;MF:iron ion binding;	------	------	------	------	COG2124	Q:Secondary metabolites biosynthesis, transport and catabolism	XP_004243253.1	cytochrome P450 CYP72A219 [Solanum lycopersicum]	sp|H2DH21|C7A29_PANGI;	Cytochrome P450 CYP72A219 OS=Panax ginseng OX=4054 PE=2 SV=1;	PF00067.24;PF01453.26;PF07714.19;PF00069.27	p450;B_lectin;PK_Tyr_Ser-Thr;Pkinase	Cytochrome P450;D-mannose binding lectin;Protein tyrosine and serine/threonine kinase;Protein kinase domain
gene_Solyc07g065530.1	Solyc07g065530.1	flocculation protein FLO.1	19.15	20.2	29.02	14.52	6.95	12.79	22.79	11.42	------	------	------	------	------	------	------	------	XP_004244068.1	flocculation protein FLO11 [Solanum lycopersicum]	------	------	------	------	------
gene_Solyc08g021940.4	Solyc08g021940.4	Calcium-dependent lipid-binding (CaLB domain) family protein (AHRD V3.11 *-* tr|A0A2U1MY23|A0A2U1MY23_ARTAN)	1.45	0.72	0.77	0.25	0.17	0.46	0.98	0.293333	GO:0006869;GO:0016021;GO:0016020;GO:0005783;GO:000828	BP:lipid transport;CC:integral component of membrane;CC:membrane;CC:endoplasmic reticulum;MF:lipid binding;	------	------	------	------	ENOG411258B;COG5038	S:Function unknown;	TMX03991.1	hypothetical protein EJD97_012462 [Solanum chilense]	sp|Q8L706|SYT5_ARATH;	Synaptotagmin-5 OS=Arabidopsis thaliana OX=3702 GN=SYT5 PE=2 SV=1;	PF17047.7	SMP_LBD	Synaptotagmin-like mitochondrial-lipid-binding domain
gene_Solyc08g061520.3	Solyc08g061520.3	Myosin (AHRD V3.3 *-* A0A2U1NL80_ARTAN)	7.71	7.62	6.58	2.15	3.95	3.5	7.30333	3.2	GO:0007015;GO:0030050;GO:0031982;GO:0005737;GO:0016459;GO:0015629;GO:0030898;GO:0000146;GO:0051015;GO:0005516;GO:0003774;GO:000552	BP:actin filament organization;BP:vesicle transport along actin filament;CC:vesicle;CC:cytoplasm;CC:myosin complex;CC:actin cytoskeleton;MF:actin-dependent ATPase activity;MF:microfilament motor activity;MF:actin filament binding;MF:calmodulin binding;MF:motor activity;MF:ATP binding;	K10357	MYO5	------	------	COG5022	Z:Cytoskeleton	KAG5591077.1	hypothetical protein H5410_041591 [Solanum commersonii]	sp|Q0WPU1|MYO15_ARATH;	Myosin-15 OS=Arabidopsis thaliana OX=3702 GN=XI-I PE=1 SV=1;	PF00063.23;PF02736.21	Myosin_head;Myosin_N	Myosin head;Myosin N-terminal SH3-like domain
gene_Solyc08g062340.3	Solyc08g062340.3	17.9 kDa class II heat shock protein (AHRD V3.3 *** A0A2G3A1B9_CAPAN)	5.8	3.2	2.17	0.92	1.1	1.18	3.72333	1.06667	GO:0051259;GO:0006457;GO:0042542;GO:0009651;GO:0009408;GO:0005737;GO:0051082;GO:004362	BP:protein oligomerization;BP:protein folding;BP:response to hydrogen peroxide;BP:response to salt stress;BP:response to heat;CC:cytoplasm;MF:unfolded protein binding;MF:protein self-association;	K13993	HSP20	map04141	Protein processing in endoplasmic reticulum	COG0071	O:Posttranslational modification, protein turnover, chaperones	NP_001234130.2	cytosolic class II small heat shock protein HCT2 [Solanum lycopersicum]	sp|O82013|HSP21_SOLPE;	17.3 kDa class II heat shock protein OS=Solanum peruvianum OX=4082 PE=2 SV=1;	PF00011.23;PF17886.3	HSP20;ArsA_HSP20	Hsp20/alpha crystallin family;HSP20-like domain found in ArsA
gene_Solyc08g078300.4	Solyc08g078300.4	Homeobox-leucine zipper protein HAT4 (AHRD V3.3 *** A0A2G2XL32_CAPBA)	12.34	11.23	9.45	4.47	4.71	5.84	11.0067	5.00667	GO:0005634;GO:0043565;GO:0000981;GO:000367	CC:nucleus;MF:sequence-specific DNA binding;MF:RNA polymerase II transcription factor activity, sequence-specific DNA binding;MF:DNA binding;	K09338	HD-ZIP	------	------	ENOG410Z2UE	K:Transcription	NP_001335344.1	homeobox-leucine zipper protein HB2-like [Solanum lycopersicum]	sp|Q05466|HAT4_ARATH;	Homeobox-leucine zipper protein HAT4 OS=Arabidopsis thaliana OX=3702 GN=HAT4 PE=1 SV=1;	PF04618.14;PF00046.31;PF02183.20;PF05920.13	HD-ZIP_N;Homeodomain;HALZ;Homeobox_KN	HD-ZIP protein N terminus;Homeodomain;Homeobox associated leucine zipper;Homeobox KN domain
gene_Solyc08g078700.3	Solyc08g078700.3	Mitochondrial small heat shock protein (AHRD V3.11 *** tr|O80432|O80432_SOLLC)	5.52	5.02	3.9	1.93	1.03	0.9	4.81333	1.28667	GO:0090158;GO:0061817;GO:0016021;GO:0005789;GO:000588	BP:endoplasmic reticulum membrane organization;BP:endoplasmic reticulum-plasma membrane tethering;CC:integral component of membrane;CC:endoplasmic reticulum membrane;CC:plasma membrane;	K13993	HSP20	map04141	Protein processing in endoplasmic reticulum	COG0071;COG5066	O:Posttranslational modification, protein turnover, chaperones;U:Intracellular trafficking, secretion, and vesicular transport	NP_001233872.1	mitochondrial small heat shock protein [Solanum lycopersicum]	sp|Q9SHC8|VAP12_ARATH;	Vesicle-associated protein 1-2 OS=Arabidopsis thaliana OX=3702 GN=PVA12 PE=1 SV=1;	PF00011.23;PF17886.3	HSP20;ArsA_HSP20	Hsp20/alpha crystallin family;HSP20-like domain found in ArsA
gene_Solyc08g083220.1	Solyc08g083220.1	Branchless trichome (AHRD V3.3 *** A0A2U1NJ24_ARTAN)	16.38	14.03	24.54	8.37	3.5	6.5	18.3167	6.12333	GO:001009	BP:trichome branching;	------	------	------	------	ENOG410YRSN	S:Function unknown	XP_004245452.1	protein BRANCHLESS TRICHOME [Solanum lycopersicum]	sp|F4I878|BLT_ARATH;	Protein BRANCHLESS TRICHOME OS=Arabidopsis thaliana OX=3702 GN=BLT PE=1 SV=1;	------	------	------
gene_Solyc09g007140.5	Solyc09g007140.5	Protein RESTRICTED TEV MOVEMENT 2 (AHRD V3.11 *-* tr|A0A1J3D687|A0A1J3D687_NOCCA)	19.48	17.5	10.69	7.53	7.11	7.24	15.89	7.29333	GO:001602	CC:integral component of membrane;	------	------	------	------	COG0071	O:Posttranslational modification, protein turnover, chaperones	XP_004246713.1	inactive protein RESTRICTED TEV MOVEMENT 2 [Solanum lycopersicum]	sp|D9UBX6|RTM2B_ARATH;	Inactive protein RESTRICTED TEV MOVEMENT 2 OS=Arabidopsis thaliana OX=3702 GN=RTM2 PE=3 SV=1;	PF00011.23	HSP20	Hsp20/alpha crystallin family
gene_Solyc09g009490.5	Solyc09g009490.5	ABSCISIC ACID-INSENSITIVE 5-like protein 4 (AHRD V3.11 *** tr|A0A2G2YPC0|A0A2G2YPC0_CAPAN)	0.97	0.8	0.53	0.16	0.28	0.24	0.766667	0.226667	GO:0010152;GO:0009737;GO:0009738;GO:0009845;GO:0045893;GO:0009414;GO:0009409;GO:0009651;GO:0005634;GO:0043565;GO:0003700;GO:004280	BP:pollen maturation;BP:response to abscisic acid;BP:abscisic acid-activated signaling pathway;BP:seed germination;BP:positive regulation of transcription, DNA-templated;BP:response to water deprivation;BP:response to cold;BP:response to salt stress;CC:nucleus;MF:sequence-specific DNA binding;MF:transcription factor activity, sequence-specific DNA binding;MF:protein homodimerization activity;	K14432	ABF	map04075	Plant hormone signal transduction	ENOG4110YI4	K:Transcription	XP_010325918.1	protein ABSCISIC ACID-INSENSITIVE 5 isoform X1 [Solanum lycopersicum]	sp|Q9SJN0|ABI5_ARATH;	Protein ABSCISIC ACID-INSENSITIVE 5 OS=Arabidopsis thaliana OX=3702 GN=ABI5 PE=1 SV=1;	PF00170.23;PF07716.17	bZIP_1;bZIP_2	bZIP transcription factor;Basic region leucine zipper
gene_Solyc09g011160.4	Solyc09g011160.4	Regulator of chromosome condensation (RCC1) family protein (AHRD V3.3 *** A0A1I9LSN5_ARATH)	2.65	2.77	2.01	0.59	0.33	0.67	2.47667	0.53	------	------	------	------	------	------	COG5184;COG5184	D:Cell cycle control, cell division, chromosome partitioning;Z:Cytoskeleton	XP_010325837.1	ultraviolet-B receptor UVR8 isoform X3 [Solanum lycopersicum]	sp|Q9FN03|UVR8_ARATH;	Ultraviolet-B receptor UVR8 OS=Arabidopsis thaliana OX=3702 GN=UVR8 PE=1 SV=1;	PF00415.20;PF13540.8	RCC1;RCC1_2	Regulator of chromosome condensation;Regulator of chromosome condensation
gene_Solyc09g011670.4	Solyc09g011670.4	Adenine nucleotide alpha hydrolases-like superfamily protein (AHRD V3.3 *** A0A2U1NYH2_ARTAN)	72.78	67.03	57.51	26.83	20.37	31.12	65.7733	26.1067	------	------	------	------	------	------	ENOG410YI8C	T:Signal transduction mechanisms	XP_004246376.1	universal stress protein PHOS32-like [Solanum lycopersicum]	sp|Q8VYN9|PHO32_ARATH;	Universal stress protein PHOS32 OS=Arabidopsis thaliana OX=3702 GN=PHOS32 PE=1 SV=1;	PF00582.28	Usp	Universal stress protein family
gene_Solyc09g059990.1	Solyc09g059990.1	RING/U-box superfamily protein (AHRD V3.3 *** A0A1I9LSG2_ARATH)	10.71	14.68	15.22	7.45	4.13	6.35	13.5367	5.97667	------	------	------	------	------	------	ENOG410YQF9	S:Function unknown	XP_004247081.1	uncharacterized protein LOC101254727 [Solanum lycopersicum]	------	------	PF13920.8;PF00097.27;PF13923.8;PF14447.8;PF13639.8;PF14634.8	zf-C3HC4_3;zf-C3HC4;zf-C3HC4_2;Prok-RING_4;zf-RING_2;zf-RING_5	Zinc finger, C3HC4 type;Zinc finger, C3HC4 type;Zinc finger, C3HC4 type;Prokaryotic RING finger family 4;Ring finger domain;zinc-RING finger domain
gene_Solyc09g065400.2	Solyc09g065400.2	F-box/kelch-repeat protein SKIP30 (AHRD V3.3 *** A0A1U8EDQ6_CAPAN)	3.99	3.54	2.61	0.65	0.03	1.09	3.38	0.59	GO:000551	MF:protein binding;	------	------	------	------	ENOG4110X8D	S:Function unknown	XP_004247180.1	F-box/kelch-repeat protein SKIP30 [Solanum lycopersicum]	sp|Q9M1W7|SKI30_ARATH;	F-box/kelch-repeat protein SKIP30 OS=Arabidopsis thaliana OX=3702 GN=SKIP30 PE=1 SV=2;	PF01344.27;PF13964.8;PF07646.17;PF13415.8	Kelch_1;Kelch_6;Kelch_2;Kelch_3	Kelch motif;Kelch motif;Kelch motif;Galactose oxidase, central domain
gene_Solyc09g072770.1	Solyc09g072770.1	Pollen Ole e.1	45.68	18.51	21.23	8.94	9.9	8.17	28.4733	9.00333	GO:001602	CC:integral component of membrane;	------	------	------	------	ENOG41117MK	S:Function unknown	XP_015169421.1	PREDICTED: tetra-peptide repeat homeobox protein 1-like isoform X1 [Solanum tuberosum]	------	------	------	------	------
gene_Solyc09g075680.1	Solyc09g075680.1	Alpha/beta-Hydrolases superfamily protein (AHRD V3.3 *** A0A2U1KK17_ARTAN)	8.78	6.51	6.99	3.14	3.16	1.38	7.42667	2.56	GO:001678	MF:hydrolase activity;	------	------	------	------	COG0657	I:Lipid transport and metabolism	XP_004247377.1	2-hydroxyisoflavanone dehydratase-like [Solanum lycopersicum]	sp|A0A2P1GIY2|HL3_CATRO;	Hydrolase 3 OS=Catharanthus roseus OX=4058 GN=HL3 PE=1 SV=1;	PF07859.15;PF00135.30;PF10340.11;PF00326.23	Abhydrolase_3;COesterase;Say1_Mug180;Peptidase_S9	alpha/beta hydrolase fold;Carboxylesterase family;Steryl acetyl hydrolase;Prolyl oligopeptidase family
gene_Solyc09g082690.3	Solyc09g082690.3	superoxide dismutase	19.7	16.88	17.61	9.82	4.84	8.34	18.0633	7.66667	GO:0009535;GO:001602	CC:chloroplast thylakoid membrane;CC:integral component of membrane;	------	------	------	------	ENOG410Y0RG	S:Function unknown	NP_001307185.1	early light inducible protein [Solanum lycopersicum]	sp|P11432|ELI_PEA;	Early light-induced protein, chloroplastic OS=Pisum sativum OX=3888 PE=2 SV=1;	PF00504.23	Chloroa_b-bind	Chlorophyll A-B binding protein
gene_Solyc09g092400.2	Solyc09g092400.2	Apyrase (AHRD V3.3 *** A0A2G2W266_CAPBA)	1.97	1.81	0.85	0.6	0.39	0.4	1.54333	0.463333	GO:0009134;GO:0016021;GO:0016020;GO:0016787;GO:0017110;GO:000552	BP:nucleoside diphosphate catabolic process;CC:integral component of membrane;CC:membrane;MF:hydrolase activity;MF:nucleoside-diphosphatase activity;MF:ATP binding;	K14641	APY	map00240;map01232;map00230	Pyrimidine metabolism;Nucleotide metabolism;Purine metabolism	COG5371;COG5371	G:Carbohydrate transport and metabolism;O:Posttranslational modification, protein turnover, chaperones	XP_025888609.1	apyrase-like [Solanum lycopersicum]	sp|P80595|APY_SOLTU;	Apyrase OS=Solanum tuberosum OX=4113 GN=RROP1 PE=1 SV=2;	PF01150.19	GDA1_CD39	GDA1/CD39
gene_Solyc10g007820.3	Solyc10g007820.3	HVA22-like protein (AHRD V3.3 *** A0A1U8EBR2_CAPAN)	12.92	14.86	9.07	6.66	3.91	7.07	12.2833	5.88	GO:001602	CC:integral component of membrane;	K17279	REEP5_6	------	------	COG5052	U:Intracellular trafficking, secretion, and vesicular transport	XP_004248208.1	HVA22-like protein f [Solanum lycopersicum]	sp|Q682H0|HA22F_ARATH;	HVA22-like protein f OS=Arabidopsis thaliana OX=3702 GN=HVA22F PE=2 SV=1;	PF03134.21	TB2_DP1_HVA22	TB2/DP1, HVA22 family
gene_Solyc10g047240.2	Solyc10g047240.2	annexin 9	17.64	14.37	9.75	5.81	3.82	3.89	13.92	4.50667	GO:0005737;GO:0005544;GO:000550	CC:cytoplasm;MF:calcium-dependent phospholipid binding;MF:calcium ion binding;	K17098	ANNAT	------	------	ENOG410XPUN	S:Function unknown	XP_004248802.1	annexin-like protein RJ4 [Solanum lycopersicum]	sp|P51074|ANX4_FRAAN;	Annexin-like protein RJ4 OS=Fragaria ananassa OX=3747 PE=2 SV=2;	PF00191.22	Annexin	Annexin
gene_Solyc10g081230.3	Solyc10g081230.3	Presenilin (AHRD V3.3 *-* A0A2G2YNL8_CAPAN)	4.9	5.61	6.83	2.47	1.96	2.35	5.78	2.26	GO:0007219;GO:0016485;GO:0005634;GO:0005798;GO:0000139;GO:0005887;GO:0005789;GO:0016021;GO:0004175;GO:000419	BP:Notch signaling pathway;BP:protein processing;CC:nucleus;CC:Golgi-associated vesicle;CC:Golgi membrane;CC:integral component of plasma membrane;CC:endoplasmic reticulum membrane;CC:integral component of membrane;MF:endopeptidase activity;MF:aspartic-type endopeptidase activity;	K04505	PSEN1, PS1	------	------	ENOG410XPZD	U:Intracellular trafficking, secretion, and vesicular transport	XP_009592592.1	presenilin-like protein At1g08700 [Nicotiana tomentosiformis]	sp|O64668|PSNA_ARATH;	Presenilin-like protein At1g08700 OS=Arabidopsis thaliana OX=3702 GN=At1g08700 PE=1 SV=1;	PF01080.19	Presenilin	Presenilin
gene_Solyc10g081570.3	Solyc10g081570.3	Marmande	1.55	0.82	3.49	0.4	0	0	1.95333	0.133333	GO:001687	MF:ligase activity;	------	------	------	------	------	------	XP_004249379.1	ABC transporter F family member 4 [Solanum lycopersicum]	------	------	------	------	------
gene_Solyc10g084240.3	Solyc10g084240.3	Peroxidase (AHRD V3.3 *** K4D3L0_SOLLC)	1.48	1.07	1.13	0.18	0.24	0.29	1.22667	0.236667	GO:0006979;GO:0042744;GO:0055114;GO:0005576;GO:0009505;GO:0009506;GO:0020037;GO:0046872;GO:000460	BP:response to oxidative stress;BP:hydrogen peroxide catabolic process;BP:oxidation-reduction process;CC:extracellular region;CC:plant-type cell wall;CC:plasmodesma;MF:heme binding;MF:metal ion binding;MF:peroxidase activity;	K00430	E1.11.1.7	map00940	Phenylpropanoid biosynthesis	ENOG410YHIH	G:Carbohydrate transport and metabolism	XP_004249496.1	peroxidase 21 [Solanum lycopersicum]	sp|Q42580|PER21_ARATH;	Peroxidase 21 OS=Arabidopsis thaliana OX=3702 GN=PER21 PE=1 SV=1;	PF00141.25	peroxidase	Peroxidase
gene_Solyc11g005390.3	Solyc11g005390.3	transmembrane protein (AHRD V3.3 *** AT3G18800.1)	5.82	6.49	6.59	3.66	2.63	2.56	6.3	2.95	GO:0016021;GO:0016020;GO:000588	CC:integral component of membrane;CC:membrane;CC:plasma membrane;	------	------	------	------	ENOG410YIDW	S:Function unknown	XP_004249871.1	uncharacterized protein LOC101263658 [Solanum lycopersicum]	------	------	------	------	------
gene_Solyc11g006890.2	Solyc11g006890.2	Unknown protein	13.57	11.65	14.31	5.8	5.77	6.77	13.1767	6.11333	GO:001602	CC:integral component of membrane;	------	------	------	------	------	------	TMW84969.1	hypothetical protein EJD97_024040 [Solanum chilense]	------	------	------	------	------
gene_Solyc11g012580.2	Solyc11g012580.2	Carbohydrate-binding X8 domain superfamily protein (AHRD V3.3 *** F4IFD7_ARATH)	15.73	7.56	7.93	5.38	3.64	5.51	10.4067	4.84333	GO:001602	CC:integral component of membrane;	------	------	------	------	ENOG410YNUZ	G:Carbohydrate transport and metabolism	XP_004250286.1	glucan endo-1,3-beta-glucosidase 4 [Solanum lycopersicum]	sp|Q94CD8|E134_ARATH;	Glucan endo-1,3-beta-glucosidase 4 OS=Arabidopsis thaliana OX=3702 GN=At3g13560 PE=2 SV=1;	PF07983.15	X8	X8 domain
gene_Solyc11g066350.2	Solyc11g066350.2	shugoshin-1-like (AHRD V3.3 *** A0A2I4EHP2_9ROSI)	6.86	8.02	8.93	4.58	2.27	3.47	7.93667	3.44	GO:0045132;GO:0034090;GO:0005634;GO:000077	BP:meiotic chromosome segregation;BP:maintenance of meiotic sister chromatid cohesion;CC:nucleus;CC:chromosome, centromeric region;	------	------	------	------	ENOG410YNQ1	S:Function unknown	XP_004250979.1	SHUGOSHIN 2 isoform X1 [Solanum lycopersicum]	sp|Q0WTB8|SGO2_ARATH;	SHUGOSHIN 2 OS=Arabidopsis thaliana OX=3702 GN=SGO2 PE=2 SV=1;	PF07557.13	Shugoshin_C	Shugoshin C terminus
gene_Solyc11g161450.1	Solyc11g161450.1	Zinc finger BED domain-containing protein RICESLEEPER 2 (AHRD V3.11 *** tr|A0A2U1PZM4|A0A2U1PZM4_ARTAN)	20.74	17.57	21.81	10.12	10.67	8.51	20.04	9.76667	GO:0005634;GO:0046983;GO:0046872;GO:000367	CC:nucleus;MF:protein dimerization activity;MF:metal ion binding;MF:DNA binding;	------	------	------	------	ENOG4111T8J	S:Function unknown	XP_015081384.1	zinc finger BED domain-containing protein RICESLEEPER 2-like [Solanum pennellii]	sp|P08770|TRA1_MAIZE;	Putative AC transposase OS=Zea mays OX=4577 PE=2 SV=2;	PF14372.8;PF02892.17	DUF4413;zf-BED	Domain of unknown function;BED zinc finger
gene_Solyc12g006977.1	Solyc12g006977.1	Unknown protein	96.7	58.17	47.33	27.32	20.52	28.03	67.4	25.29	------	------	------	------	------	------	ENOG410Y973	S:Function unknown	PHT73391.1	Leucine-rich repeat extensin-like protein 5 [Capsicum annuum]	sp|Q9LHF1|LRX4_ARATH;	Leucine-rich repeat extensin-like protein 4 OS=Arabidopsis thaliana OX=3702 GN=LRX4 PE=1 SV=1;	------	------	------
gene_Solyc12g011023.1	Solyc12g011023.1	Xyloglucan endotransglucosylase/hydrolase (AHRD V3.3 *** Q6RHX7_SOLLC)	4.53	4.92	7.47	1.18	1.5	0.56	5.64	1.08	GO:0042546;GO:0005975;GO:0071555;GO:0010411;GO:0005618;GO:0048046;GO:0016762;GO:000455	BP:cell wall biogenesis;BP:carbohydrate metabolic process;BP:cell wall organization;BP:xyloglucan metabolic process;CC:cell wall;CC:apoplast;MF:xylogluca;MF:hydrolase activity, hydrolyzing O-glycosyl compounds;	K08235	E2.4.1.207	------	------	COG2273	G:Carbohydrate transport and metabolism	NP_001234478.1	xyloglucan endotransglucosylase-hydrolase XTH9-like precursor [Solanum lycopersicum]	sp|Q8LG58|XTH16_ARATH;	Probable xyloglucan endotransglucosylase/hydrolase protein 16 OS=Arabidopsis thaliana OX=3702 GN=XTH16 PE=2 SV=2;	PF00722.23;PF06955.14	Glyco_hydro_16;XET_C	Glycosyl hydrolases family 16;Xyloglucan endo-transglycosylase
gene_Solyc12g014360.2	Solyc12g014360.2	protein trichome birefringence-like .1	10.11	11.82	9.76	5.32	2.83	5.58	10.5633	4.57667	GO:0005794;GO:001641	CC:Golgi apparatus;MF:O-acetyltransferase activity;	------	------	------	------	ENOG41118PY	S:Function unknown	NP_001297253.1	protein trichome birefringence-like 41 precursor [Solanum lycopersicum]	sp|F4IWA8|TBL41_ARATH;	Protein trichome birefringence-like 41 OS=Arabidopsis thaliana OX=3702 GN=TBL41 PE=2 SV=1;	PF13839.8;PF14416.8	PC-Esterase;PMR5N	GDSL/SGNH-like Acyl-Esterase family found in Pmr5 and Cas1p;PMR5 N terminal Domain
gene_Solyc12g017850.2	Solyc12g017850.2	DUF5.1	2.72	3.62	2.45	1.48	1.36	1.23	2.93	1.35667	------	------	------	------	------	------	ENOG410YS2J;ENOG410YPF7	S:Function unknown;	XP_004251977.1	uncharacterized protein LOC101261201 [Solanum lycopersicum]	sp|Q8GYX2|FLZ14_ARATH;	FCS-Like Zinc finger 14 OS=Arabidopsis thaliana OX=3702 GN=FLZ14 PE=1 SV=1;	PF04570.16	zf-FLZ	zinc-finger of the FCS-type, C2-C2
gene_Solyc12g027897.1	Solyc12g027897.1	Unknown protein	85.77	85.05	107.33	43.03	21.97	32.67	92.7167	32.5567	------	------	------	------	------	------	------	------	------	------	------	------	------	------	------
gene_Solyc12g042500.2	Solyc12g042500.2	Gibberellin-regulated family protein (AHRD V3.3 *** A0A2U1P8W2_ARTAN)	34.17	31.95	40.34	26.01	9.53	19.2	35.4867	18.2467	------	------	------	------	------	------	ENOG410YU8R	S:Function unknown	XP_004252296.1	peamaclein-like [Solanum lycopersicum]	sp|Q948Z4|SNAK1_SOLTU;	Snakin-1 OS=Solanum tuberosum OX=4113 GN=SN1 PE=1 SV=1;	PF02704.16	GASA	Gibberellin regulated protein
gene_Solyc12g056990.1	Solyc12g056990.1	nucleolar GTP-binding protein (AHRD V3.3 *** AT1G78110.1)	8.48	9.04	7.61	3.2	2.87	4.02	8.37667	3.36333	------	------	------	------	------	------	ENOG410YFKY	S:Function unknown	XP_004252537.1	cation channel sperm-associated protein 2-like [Solanum lycopersicum]	------	------	------	------	------
gene_Solyc12g057140.1	Solyc12g057140.1	Unknown protein	41.71	32.64	34.85	18.09	20.68	20.34	36.4	19.7033	------	------	------	------	------	------	------	------	KAG5573327.1	hypothetical protein H5410_063093 [Solanum commersonii]	------	------	------	------	------
gene_Solyc12g057150.1	Solyc12g057150.1	Unknown protein	35.65	27.46	33.32	17.35	18.62	14.42	32.1433	16.7967	------	------	------	------	------	------	------	------	KAG5573329.1	hypothetical protein H5410_063095, partial [Solanum commersonii]	------	------	------	------	------
gene_Solyc12g077660.3	Solyc12g077660.3	NAP1-related protein 2 (AHRD V3.3 *-* A0A2G3AUT2_CAPCH)	14.94	14.89	13.29	6.49	2.92	7.47	14.3733	5.62667	GO:0006334;GO:0000785;GO:0005634;GO:0003682;GO:004239	BP:nucleosome assembly;CC:chromatin;CC:nucleus;MF:chromatin binding;MF:histone binding;	K11290	SET, TAF1, I2PP2A	------	------	ENOG410XQRX	S:Function unknown	XP_027769105.1	NAP1-related protein 2-like isoform X3 [Solanum pennellii]	sp|Q8LC68|NRP2_ARATH;	NAP1-related protein 2 OS=Arabidopsis thaliana OX=3702 GN=NRP2 PE=1 SV=2;	PF00956.20	NAP	Nucleosome assembly protein
gene_Solyc12g095810.2	Solyc12g095810.2	Protein NRT1/ PTR FAMILY 1.1	4.64	4.04	2.99	1.61	1.72	1.42	3.89	1.58333	GO:0006857;GO:0006817;GO:0055085;GO:0016021;GO:0016020;GO:0005886;GO:0022857;GO:004698	BP:oligopeptide transport;BP:phosphate ion transport;BP:transmembrane transport;CC:integral component of membrane;CC:membrane;CC:plasma membrane;MF:transmembrane transporter activity;MF:protein dimerization activity;	K14638	SLC15A3_4, PHT	------	------	COG3104	E:Amino acid transport and metabolism	XP_004253108.2	protein NRT1/ PTR FAMILY 1.2 [Solanum lycopersicum]	sp|Q9M817|PTR6_ARATH;	Protein NRT1/ PTR FAMILY 1.2 OS=Arabidopsis thaliana OX=3702 GN=NPF1.2 PE=1 SV=1;	PF00854.23	PTR2	POT family
gene_Solyc12g096510.3	Solyc12g096510.3	Pentatricopeptide repeat (AHRD V3.3 *** A0A200R1T0_9MAGN)	1.16	0.69	1.86	0.14	0	0	1.23667	0.046667	GO:000827	MF:zinc ion binding;	------	------	------	------	ENOG410Z7Z7	S:Function unknown	XP_004253185.1	pentatricopeptide repeat-containing protein At5g66520-like [Solanum lycopersicum]	sp|Q9FJY7|PP449_ARATH;	Pentatricopeptide repeat-containing protein At5g66520 OS=Arabidopsis thaliana OX=3702 GN=PCMP-H61 PE=2 SV=1;	PF01535.22;PF13041.8;PF14432.8;PF12854.9;PF13812.8	PPR;PPR_2;DYW_deaminase;PPR_1;PPR_3	PPR repeat;PPR repeat family;DYW family of nucleic acid deaminases;PPR repeat;Pentatricopeptide repeat domain
gene_Solyc12g098900.2	Solyc12g098900.2	Late embryogenesis abundant protein D-29 (AHRD V3.3 *-* A0A2G3B563_CAPCH)	1.54	1.88	0.93	0.44	0.29	0	1.45	0.243333	GO:001602	CC:integral component of membrane;	------	------	------	------	ENOG410ZPS2	S:Function unknown	XP_004252956.1	late embryogenesis abundant protein D-29 [Solanum lycopersicum]	------	------	PF02987.18	LEA_4	Late embryogenesis abundant protein

## Sheet: Cd+Pb_vs_Control_cluster1
Gene_id	Gene_name	Gene_description	Control_1	Control_2	Control_3	Cd+Pb_1	Cd+Pb_2	Cd+Pb_3	Control	Cd+Pb	GO_id	GO_term	KO_id	KO_name	Pathway_id	Pathway_definition	COG_id	COG_Functional Categories	NR_hit-name	NR_description	Swiss-Prot_hit-name	Swiss-Prot_description	Pfam_id	Domain	Domain description
gene_Solyc01g005280.3	Solyc01g005280.3	Sec14p-like phosphatidylinositol transfer family protein (AHRD V3.3 *** A0A1Y1I4L4_KLENI)	5.56	6.42	8.89	12.36	14.18	15.78	6.95667	14.1067	------	------	------	------	------	------	ENOG410Y3Q0	S:Function unknown	XP_004228740.1	SEC14 cytosolic factor-like [Solanum lycopersicum]	sp|P24280|SEC14_YEAST;	SEC14 cytosolic factor OS=Saccharomyces cerevisiae;	PF00650.22	CRAL_TRIO	CRAL/TRIO domain
gene_Solyc01g005980.4	Solyc01g005980.4	transmembrane protein%2C putative (Protein of unknown function%2C DUF538) (AHRD V3.3 *** AT5G19860.1)	14.47	17.35	13.58	31.42	25.64	36.71	15.1333	31.2567	GO:0005773;GO:001602	CC:vacuole;CC:integral component of membrane;	------	------	------	------	ENOG410YP31	S:Function unknown	XP_004228712.1	uncharacterized protein LOC101247847 [Solanum lycopersicum]	------	------	PF04398.14	DUF538	Protein of unknown function, DUF538
gene_Solyc01g006100.4	Solyc01g006100.4	cytosine-5 DNA methyltransferase1L	3.97	4.3	8.73	7.07	12.78	13.5	5.66667	11.1167	GO:0006325;GO:0005634;GO:0003886;GO:0003682;GO:000367	BP:chromatin organization;CC:nucleus;MF:DN;MF:chromatin binding;MF:DNA binding;	K00558	DNMT1, dcm	map00270	Cysteine and methionine metabolism	COG0270	L:Replication, recombination and repair	XP_004228597.2	DNA (cytosine-5)-methyltransferase 1 isoform X2 [Solanum lycopersicum]	sp|C0SQ89|CMT3_ORYSJ;	DNA;	PF00145.19;PF00385.26;PF01426.20	DNA_methylase;Chromo;BAH	C-5 cytosine-specific DNA methylase;Chromo;BAH domain
gene_Solyc01g006390.2	Solyc01g006390.2	Pistil extensin like protein, partial CDS only (AHRD V3.3 *-* Q7DLN2_TOBAC)	0	0.49	0.59	8.73	47.79	44.82	0.36	33.78	------	------	------	------	------	------	------	------	NP_001234866.1	extensin-like protein precursor [Solanum lycopersicum]	------	------	------	------	------
gene_Solyc01g006430.3	Solyc01g006430.3	Fatty acid desaturase (AHRD V3.3 *** E7CCC0_9BRAS)	85.2	86.1	93.04	157.27	261.56	187.99	88.1133	202.273	GO:0006629;GO:0016021;GO:001671	BP:lipid metabolic process;CC:integral component of membrane;MF:oxidoreductase activity, acting on paired donors, with oxidation of a pair of donors resulting in the reduction of molecular oxygen to two molecules of water;	K10256	FAD2	map01040	Biosynthesis of unsaturated fatty acids	COG3239	I:Lipid transport and metabolism	XP_004228665.1	delta(12)-fatty-acid desaturase FAD2 [Solanum lycopersicum]	sp|Q84VT2|FAD12_PUNGR;	Delt;	PF00487.26;PF11960.10	FA_desaturase;DUF3474	Fatty acid desaturase;Domain of unknown function
gene_Solyc01g006580.4	Solyc01g006580.4	2-oxoglutarate (2OG) and Fe(II)-dependent oxygenase superfamily protein (AHRD V3.3 *** A0A2U1LXD5_ARTAN)	1.01	0.67	1.34	0.64	12.91	2.44	1.00667	5.33	GO:0055114;GO:0031418;GO:0046872;GO:0051213;GO:001649	BP:oxidation-reduction process;MF:L-ascorbic acid binding;MF:metal ion binding;MF:dioxygenase activity;MF:oxidoreductase activity;	------	------	------	------	COG3491	S:Function unknown	XP_004228709.1	probable inactive 2-oxoglutarate-dependent dioxygenase AOP2 [Solanum lycopersicum]	sp|A0A0N9HQ36|2ODD_SINHE;	Deoxypodophyllotoxin synthase OS=Sinopodophyllum hexandrum OX=93608 GN=2-ODD PE=1 SV=1;	PF03171.22;PF14226.8	2OG-FeII_Oxy;DIOX_N	2OG-F;non-haem dioxygenase in morphine synthesis N-terminal
gene_Solyc01g006660.4	Solyc01g006660.4	Subtilisin-like protease-like protein (AHRD V3.11 *** tr|A0A2K3N634|A0A2K3N634_TRIPR)	2.56	3.2	2.45	6.88	5.58	4.93	2.73667	5.79667	GO:0006508;GO:000425	BP:proteolysis;MF:serine-type endopeptidase activity;	------	------	------	------	COG1404	O:Posttranslational modification, protein turnover, chaperones	XP_004228919.2	CO(2)-response secreted protease-like [Solanum lycopersicum]	sp|Q9LNU1|CRSP_ARATH;	C;	PF00082.24;PF17766.3;PF05922.18	Peptidase_S8;fn3_6;Inhibitor_I9	Subtilase family;Fibronectin type-III domain;Peptidase inhibitor I9
gene_Solyc01g007040.4	Solyc01g007040.4	RING-type E3 ubiquitin transferase (AHRD V3.3 *-* A0A2G3AY39_CAPCH)	4.75	3.23	1.03	19.72	11.31	11.66	3.00333	14.23	GO:0016567;GO:000484	BP:protein ubiquitination;MF:ubiquitin-protein transferase activity;	------	------	------	------	ENOG410YC1Z	O:Posttranslational modification, protein turnover, chaperones	XP_010315681.1	LOW QUALITY PROTEIN: E3 ubiquitin-protein ligase PUB22-like [Solanum lycopersicum]	sp|Q9SVC6|PUB22_ARATH;	E3 ubiquitin-protein ligase PUB22 OS=Arabidopsis thaliana OX=3702 GN=PUB22 PE=1 SV=1;	PF04564.17;PF11789.10	U-box;zf-Nse	U-box domain;Zinc-finger of the MIZ type in Nse subunit
gene_Solyc01g007080.3	Solyc01g007080.3	Aluminum-activated malate transporter (AHRD V3.3 *** A0A2U1PS47_ARTAN)	0	0	0	0.17	0.09	0.23	0	0.163333	GO:0015743;GO:0016021;GO:000970	BP:malate transport;CC:integral component of membrane;CC:plant-type vacuole membrane;	------	------	------	------	ENOG410XR8V	S:Function unknown	XP_004228909.1	aluminum-activated malate transporter 8-like [Solanum lycopersicum]	sp|Q9SRM9|ALMT8_ARATH;	Aluminum-activated malate transporter 8 OS=Arabidopsis thaliana OX=3702 GN=ALMT8 PE=3 SV=1;	PF11744.10;PF13515.8	ALMT;FUSC_2	Aluminium activated malate transporter;Fusaric acid resistance protein-like
gene_Solyc01g007810.1	Solyc01g007810.1	ovate family protein 3	0.85	2.58	5.7	6.77	6.99	12.67	3.04333	8.81	GO:0045892;GO:000563	BP:negative regulation of transcription, DNA-templated;CC:nucleus;	------	------	------	------	ENOG41106YS	S:Function unknown	XP_010315430.1	transcription repressor OFP15 [Solanum lycopersicum]	sp|Q9FMC8|OPF13_ARATH;	Transcription repressor OFP13 OS=Arabidopsis thaliana OX=3702 GN=OFP13 PE=1 SV=1;	PF04844.15	Ovate	Transcriptional repressor, ovate
gene_Solyc01g007870.3	Solyc01g007870.3	hypothetical protein (AHRD V3.3 *** AT5G06270.2)	4.08	3.8	5.18	7.62	7.93	14.19	4.35333	9.91333	------	------	------	------	------	------	ENOG4111EE3	S:Function unknown	XP_019067411.1	uncharacterized protein LOC101253518 [Solanum lycopersicum]	sp|Q9SRN4|GIR2_ARATH;	Protein GL2-INTERACTING REPRESSOR 2 OS=Arabidopsis thaliana OX=3702 GN=GIR2 PE=1 SV=1;	------	------	------
gene_Solyc01g008420.3	Solyc01g008420.3	Protein DETOXIFICATION (AHRD V3.3 *** S6BP63_TOBAC)	0.51	0.53	0.47	1.04	1.22	1.06	0.503333	1.10667	GO:0006855;GO:0055085;GO:0016021;GO:0016020;GO:0015297;GO:0015238;GO:004291	BP:drug transmembrane transport;BP:transmembrane transport;CC:integral component of membrane;CC:membrane;MF:antiporter activity;MF:drug transmembrane transporter activity;MF:xenobiotic transporter activity;	K03327	TC.MATE, SLC47A, norM, mdtK, dinF	------	------	COG0534	V:Defense mechanisms	XP_010315164.1	protein DETOXIFICATION 42-like [Solanum lycopersicum]	sp|Q9SYD6|DTX42_ARATH;	Protein DETOXIFICATION 42 OS=Arabidopsis thaliana OX=3702 GN=DTX42 PE=2 SV=2;	PF01554.20;PF14667.8	MatE;Polysacc_synt_C	MatE;Polysaccharide biosynthesis C-terminal domain
gene_Solyc01g008670.5	Solyc01g008670.5	Cytochrome (AHRD V3.11 *** tr|A0A1U8F0H8|A0A1U8F0H8_CAPAN)	3.56	4.11	5.69	8.33	7.87	17.65	4.45333	11.2833	GO:0055114;GO:0016021;GO:0004497;GO:0020037;GO:0016705;GO:000550	BP:oxidation-reduction process;CC:integral component of membrane;MF:monooxygenase activity;MF:heme binding;MF:oxidoreductase activity, acting on paired donors, with incorporation or reduction of molecular oxygen;MF:iron ion binding;	------	------	------	------	COG2124	Q:Secondary metabolites biosynthesis, transport and catabolism	XP_004228509.1	premnaspirodiene oxygenase-like [Solanum lycopersicum]	sp|A6YIH8|C7D55_HYOMU;	Premnaspirodiene oxygenase OS=Hyoscyamus muticus OX=35626 GN=CYP71D55 PE=1 SV=1;	PF00067.24	p450	Cytochrome P450
gene_Solyc01g009160.2	Solyc01g009160.2	Late embryogenesis abundant (LEA) hydroxyproline-rich glycoprotein family (AHRD V3.3 *** Q84VP8_ARATH)	5.24	5.53	6.9	13.38	9.8	10.66	5.89	11.28	GO:001602	CC:integral component of membrane;	------	------	------	------	ENOG410YIDD	S:Function unknown	NP_001315302.1	harpin-induced1-like [Solanum lycopersicum]	sp|Q9ZVD2|NHL13_ARATH;	NDR1/HIN1-like protein 13 OS=Arabidopsis thaliana OX=3702 GN=NHL13 PE=2 SV=1;	PF03168.15	LEA_2	Late embryogenesis abundant protein
gene_Solyc01g010650.3	Solyc01g010650.3	UDP-galactose UDP-glucose transporter 3-like protein (AHRD V3.3 *** A0A2K3NS07_TRIPR)	18.5	19.21	22.01	34.57	39.78	41.11	19.9067	38.4867	GO:0008643;GO:0072334;GO:0055085;GO:0030176;GO:0016021;GO:0030173;GO:0015297;GO:0022857;GO:0005460;GO:000545	BP:carbohydrate transport;BP:UDP-galactose transmembrane transport;BP:transmembrane transport;CC:integral component of endoplasmic reticulum membrane;CC:integral component of membrane;CC:integral component of Golgi membrane;MF:antiporter activity;MF:transmembrane transporter activity;MF:UDP-glucose transmembrane transporter activity;MF:UDP-galactose transmembrane transporter activity;	K15275	SLC35B1	------	------	COG0697;COG0697	E:Amino acid transport and metabolism;G:Carbohydrate transport and metabolism	XP_004228392.1	UDP-galactose/UDP-glucose transporter 3 [Solanum lycopersicum]	sp|Q9M9S6|UTR3_ARATH;	UDP-galactose/UDP-glucose transporter 3 OS=Arabidopsis thaliana OX=3702 GN=UTR3 PE=1 SV=1;	PF08449.13;PF00892.22	UAA;EamA	UAA transporter family;EamA-like transporter family
gene_Solyc01g014275.1	Solyc01g014275.1	glycine-rich cell wall structural protein-like (AHRD V3.3 *-* XP_019067541.1)	2.28	1.19	2.85	12.96	22.65	24.63	2.10667	20.08	------	------	------	------	------	------	------	------	KAG5629131.1	hypothetical protein H5410_000848 [Solanum commersonii]	------	------	------	------	------
gene_Solyc01g056990.3	Solyc01g056990.3	hypothetical protein (AHRD V3.3 *** AT5G06590.1)	0.3	0.59	1.99	1.76	4.84	2.75	0.96	3.11667	GO:0007059;GO:0007049;GO:0005737;GO:0005819;GO:0016021;GO:000094	BP:chromosome segregation;BP:cell cycle;CC:cytoplasm;CC:spindle;CC:integral component of membrane;CC:condensed chromosome outer kinetochore;	------	------	------	------	ENOG41129HA	S:Function unknown	XP_004229131.1	uncharacterized protein LOC101257802 isoform X1 [Solanum lycopersicum]	------	------	------	------	------
gene_Solyc01g057310.5	Solyc01g057310.5	Phragmoplast orienting kinesin 2 (AHRD V3.11 *** tr|A0A2G2XPE0|A0A2G2XPE0_CAPBA)	1.37	1.4	1.98	2.11	3.91	3.06	1.58333	3.02667	GO:0007018;GO:0005874;GO:0005871;GO:0008574;GO:0008017;GO:0003777;GO:0016887;GO:1990939;GO:000552	BP:microtubule-based movement;CC:microtubule;CC:kinesin complex;MF:ATP-dependent microtubule motor activity, plus-end-directed;MF:microtubule binding;MF:microtubule motor activity;MF:ATPase activity;MF:ATP-dependent microtubule motor activity;MF:ATP binding;	K10400	KIF15	------	------	ENOG410YD34;COG5059	S:Function unknown;Z:Cytoskeleton	XP_004229119.1	kinesin-like protein KIN-12C isoform X1 [Solanum lycopersicum]	sp|Q27IK7|KN12C_ARATH;	Kinesin-like protein KIN-12C OS=Arabidopsis thaliana OX=3702 GN=KIN12C PE=1 SV=1;	------	------	------
gene_Solyc01g057320.3	Solyc01g057320.3	Kinesin (AHRD V3.3 *-* A0A200QSU4_9MAGN)	1.07	1.32	1.46	1.77	3.73	2.79	1.28333	2.76333	GO:0007018;GO:0005874;GO:0008574;GO:1990939;GO:0008017;GO:0003777;GO:000552	BP:microtubule-based movement;CC:microtubule;MF:ATP-dependent microtubule motor activity, plus-end-directed;MF:ATP-dependent microtubule motor activity;MF:microtubule binding;MF:microtubule motor activity;MF:ATP binding;	K10400	KIF15	------	------	COG5059	Z:Cytoskeleton	XP_004229119.1	kinesin-like protein KIN-12C isoform X1 [Solanum lycopersicum]	sp|Q27IK7|KN12C_ARATH;	Kinesin-like protein KIN-12C OS=Arabidopsis thaliana OX=3702 GN=KIN12C PE=1 SV=1;	PF00225.25;PF16796.7	Kinesin;Microtub_bd	Kinesin motor domain;Microtubule binding
gene_Solyc01g058670.3	Solyc01g058670.3	Transcription factor (AHRD V3.3 *** A0A2G3DG53_CAPCH)	16.67	18.66	18.05	22.2	55.78	22.43	17.7933	33.47	GO:0006355;GO:0005634;GO:004698	BP:regulation of transcription, DNA-templated;CC:nucleus;MF:protein dimerization activity;	------	------	------	------	ENOG410YRF4	K:Transcription	XP_004229017.1	transcription factor bHLH148 [Solanum lycopersicum]	sp|Q9C8Z9|BH148_ARATH;	Transcription factor bHLH148 OS=Arabidopsis thaliana OX=3702 GN=BHLH148 PE=1 SV=1;	------	------	------
gene_Solyc01g066760.2	Solyc01g066760.2	Unknown protein	9.82	12.45	26.26	19.94	50.9	44.87	16.1767	38.57	GO:001602	CC:integral component of membrane;	------	------	------	------	ENOG410Z0WX	S:Function unknown	XP_004229246.1	uncharacterized protein LOC101255730 [Solanum lycopersicum]	------	------	------	------	------
gene_Solyc01g067040.2	Solyc01g067040.2	Tudor/PWWP/MBT superfamily protein (AHRD V3.3 *-* A0A1I9LQQ5_ARATH)	0.03	0.13	0.06	0.2	0.73	0.33	0.073333	0.42	------	------	------	------	------	------	COG0270	L:Replication, recombination and repair	XP_010321269.1	uncharacterized protein LOC104647540 [Solanum lycopersicum]	sp|Q5RKN4|GLYR1_DANRE;	Putative oxidoreductase GLYR1 OS=Danio rerio OX=7955 GN=glyr1 PE=2 SV=1;	PF00855.19	PWWP	PWWP domain
gene_Solyc01g067380.4	Solyc01g067380.4	Alpha/beta-Hydrolases superfamily protein (AHRD V3.3 *** Q6DBI3_ARATH)	9.56	8.47	9.03	13.33	21.19	15.09	9.02	16.5367	GO:000662	BP:lipid metabolic process;	------	------	------	------	ENOG410YTPI;ENOG410XSI0;ENOG4112AY3	S:Function unknown;	XP_004229215.1	lipase [Solanum lycopersicum]	sp|P19515|LIP_RHIMI;	Lipase OS=Rhizomucor miehei OX=4839 PE=1 SV=2;	PF01764.27;PF11187.10	Lipase_3;DUF2974	Lipase;Protein of unknown function
gene_Solyc01g068280.3	Solyc01g068280.3	Protein CHROMATIN REMODELING 24 (AHRD V3.3 *** A0A2G3DH52_CAPCH)	7.53	9.39	10.48	14.75	23.01	20.21	9.13333	19.3233	GO:0070615;GO:0005524;GO:001561	MF:nucleosome-dependent ATPase activity;MF:ATP binding;MF:DNA translocase activity;	K20093	ERCC6L, PICH	------	------	ENOG410XP4Z	L:Replication, recombination and repair	XP_010320782.1	protein CHROMATIN REMODELING 24 isoform X1 [Solanum lycopersicum]	sp|Q8W103|CHR24_ARATH;	Protein CHROMATIN REMODELING 24 OS=Arabidopsis thaliana OX=3702 GN=CHR24 PE=2 SV=1;	PF00176.25;PF00271.33;PF13872.8;PF04851.17	SNF2-rel_dom;Helicase_C;AAA_34;ResIII	SNF2-related domain;Helicase conserved C-terminal domain;P-loop containing NTP hydrolase pore-1;Type III restriction enzyme, res subunit
gene_Solyc01g068410.5	Solyc01g068410.5	Auxin efflux carrier component (AHRD V3.11 *** tr|E5KGD6|E5KGD6_SOLLC)	0	0.26	0.27	0.57	2.76	1.4	0.176667	1.57667	GO:0010315;GO:0009734;GO:0010252;GO:0009926;GO:0055085;GO:0005783;GO:0016021;GO:0005886;GO:001032	BP:auxin efflux;BP:auxin-activated signaling pathway;BP:auxin homeostasis;BP:auxin polar transport;BP:transmembrane transport;CC:endoplasmic reticulum;CC:integral component of membrane;CC:plasma membrane;MF:auxin efflux transmembrane transporter activity;	K13947	PIN	------	------	ENOG410YAQ9	U:Intracellular trafficking, secretion, and vesicular transport	NP_001234192.1	auxin efflux carrier component 5 [Solanum lycopersicum]	sp|Q9FFD0|PIN5_ARATH;	Auxin efflux carrier component 5 OS=Arabidopsis thaliana OX=3702 GN=PIN5 PE=2 SV=2;	PF03547.20	Mem_trans	Membrane transport protein
gene_Solyc01g073970.3	Solyc01g073970.3	Histone H3 (AHRD V3.3 *** B3TM40_ELAGV)	0	0	0	0.87	1.01	2.81	0	1.56333	GO:0010369;GO:0005634;GO:0000786;GO:0046982;GO:000367	CC:chromocenter;CC:nucleus;CC:nucleosome;MF:protein heterodimerization activity;MF:DNA binding;	K11253	H3	------	------	------	------	XP_004512510.2	LOW QUALITY PROTEIN: histone H3.2 [Cicer arietinum]	sp|P59226|H32_ARATH;	Histone H3.2 OS=Arabidopsis thaliana OX=3702 GN=HTR2 PE=1 SV=2;	PF00125.26;PF15511.8;PF15630.8	Histone;CENP-T_C;CENP-S	Core histone H2A/H2B/H3/H4;Centromere kinetochore component CENP-T histone fold;CENP-S protein
gene_Solyc01g074000.4	Solyc01g074000.4	Histone H3 (AHRD V3.11 *** tr|B3TM40|B3TM40_ELAGV)	31.49	45.2	102.81	97.58	99.48	161.29	59.8333	119.45	GO:0016021;GO:0010369;GO:0000786;GO:0005634;GO:0003677;GO:004698	CC:integral component of membrane;CC:chromocenter;CC:nucleosome;CC:nucleus;MF:DNA binding;MF:protein heterodimerization activity;	K11253	H3	------	------	COG2036	B:Chromatin structure and dynamics	KAG7626788.1	Histone H2A/H2B/H3, partial [Arabidopsis thaliana x Arabidopsis arenosa]	sp|P59226|H32_ARATH;	Histone H3.2 OS=Arabidopsis thaliana OX=3702 GN=HTR2 PE=1 SV=2;	PF00125.26;PF15511.8;PF15630.8	Histone;CENP-T_C;CENP-S	Core histone H2A/H2B/H3/H4;Centromere kinetochore component CENP-T histone fold;CENP-S protein
gene_Solyc01g074030.3	Solyc01g074030.3	Beta-glucosidase (AHRD V3.3 *** Q43014_PRUAV)	69.97	91.82	112.64	175.38	184.03	218.66	91.4767	192.69	GO:0005975;GO:0008422;GO:000455	BP:carbohydrate metabolic process;MF:beta-glucosidase activity;MF:hydrolase activity, hydrolyzing O-glycosyl compounds;	K01188	E3.2.1.21	map00460;map00500;map00999	Cyanoamino acid metabolism;Starch and sucrose metabolism;Biosynthesis of various plant secondary metabolites	COG2723	G:Carbohydrate transport and metabolism	NP_001234412.1	beta-glucosidase 01 precursor [Solanum lycopersicum]	sp|Q75W17|FURH_VIBFR;	Furcatin hydrolase OS=Viburnum furcatum OX=237940 PE=1 SV=1;	PF00232.20	Glyco_hydro_1	Glycosyl hydrolase family 1
gene_Solyc01g079750.3	Solyc01g079750.3	MAP kinase kinase kinase 4	2.85	3.5	4.52	5.55	12.97	8.95	3.62333	9.15667	GO:0000919;GO:0006468;GO:0006952;GO:0106311;GO:0005856;GO:0009524;GO:0005634;GO:0004672;GO:0004709;GO:0005524;GO:010631	BP:cell plate assembly;BP:protein phosphorylation;BP:defense response;BP:old GO;CC:cytoskeleton;CC:phragmoplast;CC:nucleus;MF:protein kinase activity;MF:MAP kinase kinase kinase activity;MF:ATP binding;MF:old GO;	K20606	ANP1	map04016	MAPK signaling pathway - plant	ENOG410XQGS	T:Signal transduction mechanisms	XP_004229416.1	mitogen-activated protein kinase kinase kinase NPK1 [Solanum lycopersicum]	sp|Q40541|NPK1_TOBAC;	Mitogen-activated protein kinase kinase kinase NPK1 OS=Nicotiana tabacum OX=4097 GN=NPK1 PE=1 SV=1;	PF00069.27;PF07714.19;PF17667.3;PF14531.8;PF03109.18	Pkinase;PK_Tyr_Ser-Thr;Pkinase_fungal;Kinase-like;ABC1	Protein kinase domain;Protein tyrosine and serine/threonine kinase;Fungal protein kinase;Kinase-like;ABC1 atypical kinase-like domain
gene_Solyc01g079980.4	Solyc01g079980.4	Eukaryotic aspartyl protease family protein (AHRD V3.11 *** tr|A0A2U1ML86|A0A2U1ML86_ARTAN)	0.39	0.42	0.79	1.24	1.78	2.69	0.533333	1.90333	GO:000419	MF:aspartic-type endopeptidase activity;	------	------	------	------	ENOG410XNV7	O:Posttranslational modification, protein turnover, chaperones	XP_004229434.1	basic 7S globulin-like [Solanum lycopersicum]	sp|P0DO21|GIP2_NICBE;	Probable aspartic proteinase GIP2 OS=Nicotiana benthamiana OX=4100 GN=GIP2 PE=1 SV=1;	PF14541.8;PF14543.8	TAXi_C;TAXi_N	Xylanase inhibitor C-terminal;Xylanase inhibitor N-terminal
gene_Solyc01g080050.5	Solyc01g080050.5	Basic helix-loop-helix (BHLH) DNA-binding superfamily protein (AHRD V3.11 *** tr|A0A2U1LW68|A0A2U1LW68_ARTAN)	0.33	0.12	0.54	0.9	0.61	1.2	0.33	0.903333	GO:0010374;GO:0010052;GO:0045893;GO:0005634;GO:0003700;GO:004698	BP:stomatal complex development;BP:guard cell differentiation;BP:positive regulation of transcription, DNA-templated;CC:nucleus;MF:transcription factor activity, sequence-specific DNA binding;MF:protein dimerization activity;	------	------	------	------	ENOG410YD82	K:Transcription	XP_004229565.1	transcription factor MUTE [Solanum lycopersicum]	sp|Q9M8K6|MUTE_ARATH;	Transcription factor MUTE OS=Arabidopsis thaliana OX=3702 GN=MUTE PE=2 SV=1;	PF00010.28	HLH	Helix-loop-helix DNA-binding domain
gene_Solyc01g080070.4	Solyc01g080070.4	Heavy metal-associated isoprenylated plant protein (AHRD V3.3 *-* A0A2R6PK24_ACTCH)	41.17	43.2	65.56	55.34	136.98	106.68	49.9767	99.6667	GO:0030001;GO:0005741;GO:004687	BP:metal ion transport;CC:mitochondrial outer membrane;MF:metal ion binding;	------	------	------	------	COG2608	S:Function unknown	XP_004229438.1	heavy metal-associated isoprenylated plant protein 33 [Solanum lycopersicum]	sp|Q9M8K5|HIP32_ARATH;	Heavy metal-associated isoprenylated plant protein 32 OS=Arabidopsis thaliana OX=3702 GN=HIPP32 PE=2 SV=1;	PF00403.28	HMA	Heavy-metal-associated domain
gene_Solyc01g081640.4	Solyc01g081640.4	DUF936 domain-containing protein (AHRD V3.3 *** A0A1Q3BMN1_CEPFO)	0.53	0.76	0.6	1.28	2.27	1.05	0.63	1.53333	GO:000801	MF:microtubule binding;	------	------	------	------	ENOG41116W0	S:Function unknown	XP_010323483.1	uncharacterized protein LOC101256626 [Solanum lycopersicum]	------	------	PF06075.14	DUF936	Plant protein of unknown function
gene_Solyc01g086800.4	Solyc01g086800.4	Histone H3 (AHRD V3.3 *** B6SYV0_MAIZE)	0	0	0	3.4	2.81	5.25	0	3.82	GO:0010369;GO:0005634;GO:0000786;GO:0046982;GO:000367	CC:chromocenter;CC:nucleus;CC:nucleosome;MF:protein heterodimerization activity;MF:DNA binding;	K11253	H3	------	------	------	------	XP_004512510.2	LOW QUALITY PROTEIN: histone H3.2 [Cicer arietinum]	sp|P59226|H32_ARATH;	Histone H3.2 OS=Arabidopsis thaliana OX=3702 GN=HTR2 PE=1 SV=2;	PF00125.26;PF15715.7	Histone;PAF	Core histone H2A/H2B/H3/H4;PCNA-associated factor histone like domain
gene_Solyc01g087095.2	Solyc01g087095.2	Telomerase reverse transcriptase (AHRD V3.3 *** A0A2G2XQD1_CAPBA)	0.1	0.1	0.27	0.34	0.5	0.43	0.156667	0.423333	GO:0015074;GO:0007004;GO:0000333;GO:0005634;GO:0000781;GO:0070034;GO:0042162;GO:0003677;GO:0003721;GO:0003964;GO:004687	BP:DNA integration;BP:telomere maintenance via telomerase;CC:telomerase catalytic core complex;CC:nucleus;CC:chromosome, telomeric region;MF:telomerase RNA binding;MF:telomeric DNA binding;MF:DNA binding;MF:telomerase RNA reverse transcriptase activity;MF:RNA-directed DNA polymerase activity;MF:metal ion binding;	K11126	TERT, EST2	------	------	ENOG410XQJH	S:Function unknown	XP_004229622.1	telomerase reverse transcriptase [Solanum lycopersicum]	sp|Q9SPU7|TERT_ARATH;	Telomerase reverse transcriptase OS=Arabidopsis thaliana OX=3702 GN=TERT PE=1 SV=1;	PF12009.10;PF00078.29	Telomerase_RBD;RVT_1	Telomerase ribonucleoprotein complex - RNA binding domain;Reverse transcriptase
gene_Solyc01g087140.5	Solyc01g087140.5	Late embryogenesis abundant protein (AHRD V3.11 *-* tr|A0A200QZY3|A0A200QZY3_9MAGN)	1.85	1.1	2.93	2.92	4.73	5.04	1.96	4.23	GO:001602	CC:integral component of membrane;	------	------	------	------	ENOG410Y949	S:Function unknown	XP_004229625.1	uncharacterized protein LOC101245398 [Solanum lycopersicum]	------	------	------	------	------
gene_Solyc01g087500.3	Solyc01g087500.3	DNA topoisomerase 2 (AHRD V3.3 *** A0A2G2XSS9_CAPBA)	7.19	8.64	14.11	11.05	22.5	22.55	9.98	18.7	GO:0000819;GO:0000712;GO:0006265;GO:0005634;GO:0003677;GO:0046872;GO:0003918;GO:000552	BP:sister chromatid segregation;BP:resolution of meiotic recombination intermediates;BP:DNA topological change;CC:nucleus;MF:DNA binding;MF:metal ion binding;MF:DNA topoisomerase type I;MF:ATP binding;	K03164	TOP2	------	------	COG0188	L:Replication, recombination and repair	XP_010324649.1	DNA topoisomerase 2 isoform X1 [Solanum lycopersicum]	sp|P30182|TOP2_ARATH;	DNA topoisomerase 2 OS=Arabidopsis thaliana OX=3702 GN=TOP2 PE=2 SV=2;	PF00521.22;PF16898.7;PF00204.27;PF02518.28;PF01751.24	DNA_topoisoIV;TOPRIM_C;DNA_gyraseB;HATPase_c;Toprim	DNA gyrase/topoisomerase IV, subunit A;C-terminal associated domain of TOPRIM;DNA gyrase B;Histidine kinase-, DNA gyrase B-, and HSP90-like ATPase;Toprim domain
gene_Solyc01g087710.2	Solyc01g087710.2	UPF0114 domain-containing protein (AHRD V3.3 *** A0A1Q3C5D7_CEPFO)	4.9	6.93	10.6	13.42	12.7	22.79	7.47667	16.3033	GO:001602	CC:integral component of membrane;	------	------	------	------	ENOG41121DM	S:Function unknown	XP_004229656.1	uncharacterized protein LOC101254731 [Solanum lycopersicum]	------	------	PF03350.18	UPF0114	Uncharacterized protein family, UPF0114
gene_Solyc01g087780.2	Solyc01g087780.2	serine protease SBT4A	31.55	41.61	51.2	98.13	87.05	150.99	41.4533	112.057	GO:0006508;GO:000425	BP:proteolysis;MF:serine-type endopeptidase activity;	------	------	------	------	COG1404	O:Posttranslational modification, protein turnover, chaperones	NP_001234780.1	subtilisin-like protease [Solanum lycopersicum]	sp|O82777|SBT3_SOLLC;	Subtilisin-like protease SBT3 OS=Solanum lycopersicum OX=4081 GN=sbt3 PE=1 SV=1;	PF00082.24;PF17766.3;PF05922.18	Peptidase_S8;fn3_6;Inhibitor_I9	Subtilase family;Fibronectin type-III domain;Peptidase inhibitor I9
gene_Solyc01g088300.3	Solyc01g088300.3	Germin-like protein subfamily.1	14.05	10.42	13.76	25.3	18.68	25.8	12.7433	23.26	GO:0048046;GO:0005618;GO:0030145;GO:004573	CC:apoplast;CC:cell wall;MF:manganese ion binding;MF:nutrient reservoir activity;	------	------	------	------	ENOG410YPZ1	S:Function unknown	XP_004229689.1	germin-like protein subfamily 1 member 17 [Solanum lycopersicum]	sp|Q9SFF9|GL17_ARATH;	Germin-like protein subfamily 1 member 7 OS=Arabidopsis thaliana OX=3702 GN=At3g05950 PE=2 SV=1;	PF00190.24;PF07883.13	Cupin_1;Cupin_2	Cupin;Cupin domain
gene_Solyc01g088390.3	Solyc01g088390.3	Sister chromatid cohesion protein DC.1	0.8	1.08	1.61	1.8	2.48	2.26	1.16333	2.18	GO:0034088;GO:0006275;GO:0007064;GO:0006260;GO:0005634;GO:0000785;GO:0000775;GO:003139	BP:maintenance of mitotic sister chromatid cohesion;BP:regulation of DNA replication;BP:mitotic sister chromatid cohesion;BP:DNA replication;CC:nucleus;CC:chromatin;CC:chromosome, centromeric region;CC:Ctf18 RFC-like complex;	K11271	DSCC1, DCC1	------	------	ENOG41108M8	S:Function unknown	XP_004229694.1	sister chromatid cohesion protein DCC1 [Solanum lycopersicum]	sp|Q6GL75|DCC1_XENTR;	Sister chromatid cohesion protein DCC1 OS=Xenopus tropicalis OX=8364 GN=dscc1 PE=2 SV=1;	PF09724.11	Dcc1	Sister chromatid cohesion protein Dcc1
gene_Solyc01g089970.3	Solyc01g089970.3	Nucleoside diphosphate kinase (AHRD V3.3 *** A0A1U8EKT2_CAPAN)	600.74	592.51	603.26	1049.14	1063.83	1223.77	598.837	1112.25	GO:0006228;GO:0006241;GO:0006183;GO:0004550;GO:0005524;GO:004687	BP:UTP biosynthetic process;BP:CTP biosynthetic process;BP:GTP biosynthetic process;MF:nucleoside diphosphate kinase activity;MF:ATP binding;MF:metal ion binding;	K00940	ndk, NME	map00240;map04016;map01232;map00230;map01240	Pyrimidine metabolism;MAPK signaling pathway - plant;Nucleotide metabolism;Purine metabolism;Biosynthesis of cofactors	COG0105	F:Nucleotide transport and metabolism	NP_001234174.2	nucleoside diphosphate kinase [Solanum lycopersicum]	sp|Q56E62|NDK1_TOBAC;	Nucleoside diphosphate kinase 1 OS=Nicotiana tabacum OX=4097 PE=2 SV=1;	PF00334.21	NDK	Nucleoside diphosphate kinase
gene_Solyc01g090150.1	Solyc01g090150.1	Unknown protein	0	0	0	1.66	2.92	0.47	0	1.68333	------	------	------	------	------	------	------	------	------	------	------	------	------	------	------
gene_Solyc01g090180.5	Solyc01g090180.5	4,5-DOPA dioxygenase extradiol (AHRD V3.11 *** tr|A0A1U8ED16|A0A1U8ED16_CAPAN)	11.5	11	10.45	24.23	25.26	30.56	10.9833	26.6833	GO:0006725;GO:0051213;GO:0016701;GO:0008198;GO:0008270;GO:001649	BP:cellular aromatic compound metabolic process;MF:dioxygenase activity;MF:oxidoreductase activity, acting on single donors with incorporation of molecular oxygen;MF:ferrous iron binding;MF:zinc ion binding;MF:oxidoreductase activity;	K15777	DODA	map00965	Betalain biosynthesis	COG3384	S:Function unknown	XP_004229740.1	4,5-DOPA dioxygenase extradiol [Solanum lycopersicum]	sp|Q70FG7|DODA_BETVU;	4,5-DOPA dioxygenase extradiol OS=Beta vulgaris OX=161934 GN=DODA PE=1 SV=1;	PF02900.20	LigB	Catalytic LigB subunit of aromatic ring-opening dioxygenase
gene_Solyc01g090965.1	Solyc01g090965.1	Bifunctional inhibitor/lipid-transfer protein/seed storage 2S albumin superfamily protein (AHRD V3.3 *** Q9FJS1_ARATH)	19.93	36.36	33.09	68.85	45.06	77.9	29.7933	63.9367	------	------	------	------	------	------	ENOG4111D88	O:Posttranslational modification, protein turnover, chaperones	NP_001333664.1	alpha amylase inhibitor/lipid-transfer/seed storage superfamily protein precursor [Solanum lycopersicum]	sp|Q8RW93|LBP65_ARATH;	Putative lipid-binding protein At4g00165 OS=Arabidopsis thaliana OX=3702 GN=At4g00165 PE=2 SV=1;	PF14547.8;PF00234.24;PF14368.8	Hydrophob_seed;Tryp_alpha_amyl;LTP_2	Hydrophobic seed protein;Protease inhibitor/seed storage/LTP family;Probable lipid transfer
gene_Solyc01g091540.3	Solyc01g091540.3	Growth-regulating factor 10 (AHRD V3.3 *** A0A2G3AGX2_CAPAN)	0.57	1.52	2.35	3.1	6.04	5.72	1.48	4.95333	GO:0032502;GO:0006355;GO:0006351;GO:0005634;GO:000552	BP:developmental process;BP:regulation of transcription, DNA-templated;BP:transcription, DNA-templated;CC:nucleus;MF:ATP binding;	------	------	------	------	ENOG4111AY1	K:Transcription	XP_010325825.1	growth-regulating factor 9 [Solanum lycopersicum]	sp|Q8S9M3|GRF9_ARATH;	Growth-regulating factor 9 OS=Arabidopsis thaliana OX=3702 GN=GRF9 PE=1 SV=1;	PF08879.12;PF08880.13	WRC;QLQ	WRC;QLQ
gene_Solyc01g091670.3	Solyc01g091670.3	3-oxo-Delta(4,5)-steroid 5-beta-reductase (AHRD V3.3 *** A0A2G3DDY0_CAPCH)	1.15	1.7	2.9	3.36	2.33	6.89	1.91667	4.19333	------	------	K22419	VEP1	------	------	ENOG410XPIJ	S:Function unknown	XP_004229838.1	iridoid synthase CYC2-like [Solanum lycopersicum]	sp|A0A1C9CX66|CYC2_CAMAC;	;	------	------	------
gene_Solyc01g094090.4	Solyc01g094090.4	3-hydroxyisobutyryl-CoA hydrolase.1	2.51	3.97	7.33	7.77	8.64	20.1	4.60333	12.17	GO:0006574;GO:0009507;GO:000386	BP:valine catabolic process;CC:chloroplast;MF:3-hydroxyisobutyryl-CoA hydrolase activity;	K05605	HIBCH	map00280;map00640;map00410	Valine, leucine and isoleucine degradation;Propanoate metabolism;beta-Alanine metabolism	COG1024	I:Lipid transport and metabolism	XP_025887610.1	3-hydroxyisobutyryl-CoA hydrolase 1-like isoform X1 [Solanum lycopersicum]	sp|Q9LKJ1|HIBC1_ARATH;	3-hydroxyisobutyryl-CoA hydrolase 1 OS=Arabidopsis thaliana OX=3702 GN=CHY1 PE=1 SV=1;	PF16113.7;PF00378.22	ECH_2;ECH_1	Enoyl-CoA hydratase/isomerase;Enoyl-CoA hydratase/isomerase
gene_Solyc01g094380.2	Solyc01g094380.2	O-glucosyltransferase rumi-like protein (AHRD V3.3 *** A0A1J3GP63_NOCCA)	2.77	1.2	2.43	5.38	4.78	6.22	2.13333	5.46	GO:0016021;GO:001674	CC:integral component of membrane;MF:transferase activity;	------	------	------	------	ENOG410XT5U	S:Function unknown	XP_010326254.1	O-glucosyltransferase rumi homolog [Solanum lycopersicum]	sp|Q8T045|RUMI_DROME;	O-glucosyltransferase rumi OS=Drosophila melanogaster OX=7227 GN=rumi PE=1 SV=1;	PF05686.14	Glyco_transf_90	Glycosyl transferase family 90
gene_Solyc01g094700.5	Solyc01g094700.5	Glycerol-3-phosphate acyltransferase, expressed (AHRD V3.11 *** tr|D8L9N9|D8L9N9_WHEAT)	23.43	28.28	35.49	54.29	54.92	74.72	29.0667	61.31	GO:0010143;GO:0016021;GO:0016020;GO:0016791;GO:0090447;GO:001674	BP:cutin biosynthetic process;CC:integral component of membrane;CC:membrane;MF:phosphatase activity;MF:glycerol-3-phosphate 2-O-acyltransferase activity;MF:transferase activity, transferring acyl groups;	K13508	GPAT	map00564;map00561	Glycerophospholipid metabolism;Glycerolipid metabolism	ENOG4111C4N	I:Lipid transport and metabolism	XP_010326475.1	glycerol-3-phosphate 2-O-acyltransferase 4 [Solanum lycopersicum]	sp|Q9LMM0|GPAT4_ARATH;	Glycerol-3-phosphate 2-O-acyltransferase 4 OS=Arabidopsis thaliana OX=3702 GN=GPAT4 PE=1 SV=1;	PF12710.9;PF01553.23	HAD;Acyltransferase	haloacid dehalogenase-like hydrolase;Acyltransferase
gene_Solyc01g095530.2	Solyc01g095530.2	hypothetical protein (AHRD V3.3 *-* AT5G41761.1)	21.78	20.28	35.46	64.77	231.82	57.52	25.84	118.037	------	------	------	------	------	------	ENOG410ZCA0	S:Function unknown	XP_010326840.1	uncharacterized protein LOC104649409 [Solanum lycopersicum]	------	------	------	------	------
gene_Solyc01g096450.5	Solyc01g096450.5	Eukaryotic aspartyl protease family protein (AHRD V3.11 *** tr|A0A2U1PLR1|A0A2U1PLR1_ARTAN)	48.54	77.19	129.75	119.36	313.12	223.57	85.16	218.683	GO:0005576;GO:0008233;GO:000419	CC:extracellular region;MF:peptidase activity;MF:aspartic-type endopeptidase activity;	------	------	------	------	ENOG410XNV7	O:Posttranslational modification, protein turnover, chaperones	XP_004230031.1	aspartyl protease AED3 [Solanum lycopersicum]	sp|O04496|AED3_ARATH;	Aspartyl protease AED3 OS=Arabidopsis thaliana OX=3702 GN=AED3 PE=1 SV=1;	PF14543.8;PF14541.8;PF00026.25	TAXi_N;TAXi_C;Asp	Xylanase inhibitor N-terminal;Xylanase inhibitor C-terminal;Eukaryotic aspartyl protease
gene_Solyc01g096670.5	Solyc01g096670.5	Cytochrome P450 (AHRD V3.11 *** tr|A0A2U1MC34|A0A2U1MC34_ARTAN)	12.3	11.26	11.73	19.77	20.63	26.67	11.7633	22.3567	GO:0055114;GO:0016020;GO:0016021;GO:0004497;GO:0020037;GO:0016709;GO:0016705;GO:000550	BP:oxidation-reduction process;CC:membrane;CC:integral component of membrane;MF:monooxygenase activity;MF:heme binding;MF:oxidoreductase activity, acting on paired donors, with incorporation or reduction of molecular oxygen, NA;MF:oxidoreductase activity, acting on paired donors, with incorporation or reduction of molecular oxygen;MF:iron ion binding;	K09754	CYP98A, C3'H	map00941;map00940;map00945	Flavonoid biosynthesis;Phenylpropanoid biosynthesis;Stilbenoid, diarylheptanoid and gingerol biosynthesis	COG2124	Q:Secondary metabolites biosynthesis, transport and catabolism	XP_004230046.1	cytochrome P450 98A2 [Solanum lycopersicum]	sp|O48922|C98A2_SOYBN;	Cytochrome P450 98A2 OS=Glycine max OX=3847 GN=CYP98A2 PE=2 SV=1;	PF00067.24	p450	Cytochrome P450
gene_Solyc01g096700.4	Solyc01g096700.4	DnaJ domain-containing protein (AHRD V3.3 *-* A0A2U1QIS2_ARTAN)	73.76	69.12	73.11	118.47	161.65	143.05	71.9967	141.057	GO:0006450;GO:0051083;GO:0005634;GO:0030544;GO:004302	BP:regulation of translational fidelity;BP:'de novo' cotranslational protein folding;CC:nucleus;MF:Hsp70 protein binding;MF:ribosome binding;	K09522	DNAJC2	------	------	COG5269	K:Transcription	NP_001332867.1	gonidialess A/Zuotin related factor-like protein [Solanum lycopersicum]	sp|P54103|DNJC2_MOUSE;	DnaJ homolog subfamily C member 2 OS=Mus musculus OX=10090 GN=Dnajc2 PE=1 SV=2;	PF00226.33;PF00249.33;PF13921.8	DnaJ;Myb_DNA-binding;Myb_DNA-bind_6	DnaJ domain;Myb-like DNA-binding domain;Myb-like DNA-binding domain
gene_Solyc01g096880.4	Solyc01g096880.4	Major facilitator superfamily protein (AHRD V3.3 *** A0A1P8AZ04_ARATH)	9.31	4.56	5.84	7.89	34.25	13.06	6.57	18.4	GO:0006857;GO:0009753;GO:0006817;GO:0009611;GO:0055085;GO:0016021;GO:0016020;GO:002285	BP:oligopeptide transport;BP:response to jasmonic acid;BP:phosphate ion transport;BP:response to wounding;BP:transmembrane transport;CC:integral component of membrane;CC:membrane;MF:transmembrane transporter activity;	------	------	------	------	COG3104	E:Amino acid transport and metabolism	XP_004230062.1	protein NRT1/ PTR FAMILY 6.2 [Solanum lycopersicum]	sp|Q9SZY4|PTR27_ARATH;	Protein NRT1/ PTR FAMILY 6.2 OS=Arabidopsis thaliana OX=3702 GN=NPF6.2 PE=1 SV=1;	PF00854.23;PF12650.9	PTR2;DUF3784	POT family;Domain of unknown function
gene_Solyc01g097070.5	Solyc01g097070.5	DNA topoisomerase (AHRD V3.11 *** tr|A0A2G2W734|A0A2G2W734_CAPBA)	1.03	0.78	2.85	2.03	4.14	4.99	1.55333	3.72	GO:0016853;GO:0008270;GO:0003676;GO:000367	MF:isomerase activity;MF:zinc ion binding;MF:nucleic acid binding;MF:DNA binding;	------	------	------	------	COG5082;COG5082;ENOG410ZKAR	O:Posttranslational modification, protein turnover, chaperones;U:Intracellular trafficking, secretion, and vesicular transport;S:Function unknown	XP_004230079.1	DNA topoisomerase 3-alpha-like [Solanum lycopersicum]	sp|Q9NG98|TOP3A_DROME;	DNA topoisomerase 3-alpha OS=Drosophila melanogaster OX=7227 GN=Top3alpha PE=2 SV=2;	PF06839.14;PF00098.25	zf-GRF;zf-CCHC	GRF zinc finger;Zinc knuckle
gene_Solyc01g097110.2	Solyc01g097110.2	Fanconi anemia group D2 protein (AHRD V3.3 *** A0A1P8B4W1_ARATH)	0.51	0.53	1.27	1.08	1.39	2.05	0.77	1.50667	GO:0031573;GO:1990918;GO:0006281;GO:0036297;GO:0015074;GO:0007129;GO:0005634;GO:0000793;GO:0070182;GO:000367	BP:intra-S DNA damage checkpoint;BP:double-strand break repair involved in meiotic recombination;BP:DNA repair;BP:interstrand cross-link repair;BP:DNA integration;BP:synapsis;CC:nucleus;CC:condensed chromosome;MF:DNA polymerase binding;MF:nucleic acid binding;	K10891	FANCD2	------	------	ENOG410XT6B	S:Function unknown	XP_010327602.1	Fanconi anemia group D2 protein homolog [Solanum lycopersicum]	sp|Q80V62|FACD2_MOUSE;	Fanconi anemia group D2 protein homolog OS=Mus musculus OX=10090 GN=Fancd2 PE=1 SV=2;	PF14631.8	FancD2	Fanconi anaemia protein FancD2 nuclease
gene_Solyc01g097390.4	Solyc01g097390.4	NAD(P)-linked oxidoreductase, aldo/keto reductase family protein (AHRD V3.3 *** A0A1Y1HY98_KLENI)	3.61	4.23	4.76	6.8	9.55	8.99	4.2	8.44667	GO:004783	MF:D-threo-aldose 1-dehydrogenase activity;	------	------	------	------	COG0667	C:Energy production and conversion	XP_004230100.1	perakine reductase-like [Solanum lycopersicum]	sp|Q3L181|PERR_RAUSE;	Perakine reductase OS=Rauvolfia serpentina OX=4060 GN=PR PE=1 SV=1;	PF00248.23	Aldo_ket_red	Aldo/keto reductase family
gene_Solyc01g097470.5	Solyc01g097470.5	Neurogenic locus notch-like protein (AHRD V3.11 *** tr|F4JIF2|F4JIF2_ARATH)	2.27	2.61	3.41	4.35	6.89	9.76	2.76333	7	------	------	------	------	------	------	ENOG410YPGF	S:Function unknown	XP_004230103.1	uncharacterized protein LOC101263938 [Solanum lycopersicum]	------	------	------	------	------
[truncated: 759 more rows]

## Sheet: Cd+Pb_vs_Control_cluster2
Gene_id	Gene_name	Gene_description	Control_1	Control_2	Control_3	Cd+Pb_1	Cd+Pb_2	Cd+Pb_3	Control	Cd+Pb	GO_id	GO_term	KO_id	KO_name	Pathway_id	Pathway_definition	COG_id	COG_Functional Categories	NR_hit-name	NR_description	Swiss-Prot_hit-name	Swiss-Prot_description	Pfam_id	Domain	Domain description
[truncated: 438 more rows]
