# Supplementary material for: Physiological and molecular response mechanisms of tomato seedlings to cadmium (Cd) and lead (Pb) stress
Source: PeerJ. 2024 Nov 29;12:e18533. doi: 10.7717/peerj.18533 (PMC11610467; doi:10.7717/peerj.18533)
Supplement: Supplemental Information 10 [file peerj-12-18533-s010.xlsx]

## Sheet: 453 DEGs
Supplementary Dataset 2a. GO terms were significantly enriched in leaves of Cd- and Pb- stressed tomato seedlings
Number	GO ID	Term Type	Description	Ratio_in_study	Ratio_in_pop	Pvalue	Padjust	Gene_ids	Gene_names
10	GO:0004867	MF	serine-type endopeptidase inhibitor activity	10/380	48/27940	2.55292e-07	0.000847221	gene_Solyc09g084480.3;gene_Solyc09g084470.3;gene_Solyc03g098790.3;gene_Solyc11g021060.2;gene_Solyc03g098795.1;gene_Solyc03g098780.2;gene_Solyc09g089500.3;gene_Solyc09g083435.1;gene_Solyc11g021020.1;gene_Solyc09g084450.3	Solyc09g084480.3;Solyc09g084470.3;Solyc03g098790.3;Solyc11g021060.2;Solyc03g098795.1;Solyc03g098780.2;Solyc09g089500.3;Solyc09g083435.1;Solyc11g021020.1;Solyc09g084450.3
12	GO:0030414	MF	peptidase inhibitor activity	12/380	90/27940	4.18918e-07	0.000847221	gene_Solyc09g084480.3;gene_Solyc09g084470.3;gene_Solyc03g098730.1;gene_Solyc03g098790.3;gene_Solyc11g021060.2;gene_Solyc03g098795.1;gene_Solyc11g022590.1;gene_Solyc09g089500.3;gene_Solyc09g083435.1;gene_Solyc11g021020.1;gene_Solyc03g098780.2;gene_Solyc09g084450.3	Solyc09g084480.3;Solyc09g084470.3;Solyc03g098730.1;Solyc03g098790.3;Solyc11g021060.2;Solyc03g098795.1;Solyc11g022590.1;Solyc09g089500.3;Solyc09g083435.1;Solyc11g021020.1;Solyc03g098780.2;Solyc09g084450.3
12	GO:0004866	MF	endopeptidase inhibitor activity	12/380	90/27940	4.18918e-07	0.000847221	gene_Solyc09g084480.3;gene_Solyc09g084470.3;gene_Solyc03g098730.1;gene_Solyc03g098790.3;gene_Solyc11g021060.2;gene_Solyc03g098795.1;gene_Solyc11g022590.1;gene_Solyc09g089500.3;gene_Solyc09g083435.1;gene_Solyc11g021020.1;gene_Solyc03g098780.2;gene_Solyc09g084450.3	Solyc09g084480.3;Solyc09g084470.3;Solyc03g098730.1;Solyc03g098790.3;Solyc11g021060.2;Solyc03g098795.1;Solyc11g022590.1;Solyc09g089500.3;Solyc09g083435.1;Solyc11g021020.1;Solyc03g098780.2;Solyc09g084450.3
12	GO:0061135	MF	endopeptidase regulator activity	12/380	91/27940	4.65003e-07	0.000847221	gene_Solyc09g084480.3;gene_Solyc09g084470.3;gene_Solyc03g098730.1;gene_Solyc03g098790.3;gene_Solyc11g021060.2;gene_Solyc03g098795.1;gene_Solyc11g022590.1;gene_Solyc09g089500.3;gene_Solyc09g083435.1;gene_Solyc11g021020.1;gene_Solyc03g098780.2;gene_Solyc09g084450.3	Solyc09g084480.3;Solyc09g084470.3;Solyc03g098730.1;Solyc03g098790.3;Solyc11g021060.2;Solyc03g098795.1;Solyc11g022590.1;Solyc09g089500.3;Solyc09g083435.1;Solyc11g021020.1;Solyc03g098780.2;Solyc09g084450.3
12	GO:0061134	MF	peptidase regulator activity	12/380	92/27940	5.15467e-07	0.000847221	gene_Solyc09g084480.3;gene_Solyc09g084470.3;gene_Solyc03g098730.1;gene_Solyc03g098790.3;gene_Solyc11g021060.2;gene_Solyc03g098795.1;gene_Solyc11g022590.1;gene_Solyc09g089500.3;gene_Solyc09g083435.1;gene_Solyc11g021020.1;gene_Solyc03g098780.2;gene_Solyc09g084450.3	Solyc09g084480.3;Solyc09g084470.3;Solyc03g098730.1;Solyc03g098790.3;Solyc11g021060.2;Solyc03g098795.1;Solyc11g022590.1;Solyc09g089500.3;Solyc09g083435.1;Solyc11g021020.1;Solyc03g098780.2;Solyc09g084450.3
8	GO:0009611	BP	response to wounding	8/380	62/27940	1.93806e-06	0.00187872	gene_Solyc01g005440.4;gene_Solyc09g084480.3;gene_Solyc09g084470.3;gene_Solyc11g011030.2;gene_Solyc09g089500.3;gene_Solyc09g083435.1;gene_Solyc12g049400.2;gene_Solyc09g084450.3	Solyc01g005440.4;Solyc09g084480.3;Solyc09g084470.3;Solyc11g011030.2;Solyc09g089500.3;Solyc09g083435.1;Solyc12g049400.2;Solyc09g084450.3
4	GO:0004034	MF	aldose 1-epimerase activity	4/380	9/27940	4.02093e-06	0.00236028	gene_Solyc02g087770.3;gene_Solyc02g087810.3;gene_Solyc02g087800.3;gene_Solyc02g087780.3	Solyc02g087770.3;Solyc02g087810.3;Solyc02g087800.3;Solyc02g087780.3
15	GO:0004857	MF	enzyme inhibitor activity	15/380	271/27940	5.28612e-06	0.00271508	gene_Solyc11g021060.2;gene_Solyc09g084480.3;gene_Solyc09g084470.3;gene_Solyc03g098790.3;gene_Solyc03g083730.1;gene_Solyc03g098795.1;gene_Solyc09g089500.3;gene_Solyc03g098730.1;gene_Solyc11g022590.1;gene_Solyc06g005460.1;gene_Solyc09g083435.1;gene_Solyc03g112970.1;gene_Solyc11g021020.1;gene_Solyc03g098780.2;gene_Solyc09g084450.3	Solyc11g021060.2;Solyc09g084480.3;Solyc09g084470.3;Solyc03g098790.3;Solyc03g083730.1;Solyc03g098795.1;Solyc09g089500.3;Solyc03g098730.1;Solyc11g022590.1;Solyc06g005460.1;Solyc09g083435.1;Solyc03g112970.1;Solyc11g021020.1;Solyc03g098780.2;Solyc09g084450.3
4	GO:0033499	BP	galactose catabolic process via UDP-galactose	4/380	10/27940	6.62954e-06	0.00302675	gene_Solyc02g087770.3;gene_Solyc02g087810.3;gene_Solyc02g087800.3;gene_Solyc02g087780.3	Solyc02g087770.3;Solyc02g087810.3;Solyc02g087800.3;Solyc02g087780.3
4	GO:0019388	BP	galactose catabolic process	4/380	10/27940	6.62954e-06	0.00302675	gene_Solyc02g087770.3;gene_Solyc02g087810.3;gene_Solyc02g087800.3;gene_Solyc02g087780.3	Solyc02g087770.3;Solyc02g087810.3;Solyc02g087800.3;Solyc02g087780.3
4	GO:0019320	BP	hexose catabolic process	4/380	11/27940	1.0306e-05	0.00403307	gene_Solyc02g087770.3;gene_Solyc02g087810.3;gene_Solyc02g087800.3;gene_Solyc02g087780.3	Solyc02g087770.3;Solyc02g087810.3;Solyc02g087800.3;Solyc02g087780.3
4	GO:0046365	BP	monosaccharide catabolic process	4/380	15/27940	4.08291e-05	0.0139806	gene_Solyc02g087770.3;gene_Solyc02g087810.3;gene_Solyc02g087800.3;gene_Solyc02g087780.3	Solyc02g087770.3;Solyc02g087810.3;Solyc02g087800.3;Solyc02g087780.3
2	GO:0019828	MF	aspartic-type endopeptidase inhibitor activity	2/380	2/27940	0.000184495	0.0522822	gene_Solyc03g098780.2;gene_Solyc03g098790.3	Solyc03g098780.2;Solyc03g098790.3
12	GO:0044282	BP	small molecule catabolic process	12/380	258/27940	0.000236952	0.0628151	gene_Solyc10g011925.2;gene_Solyc02g070430.4;gene_Solyc04g009960.3;gene_Solyc02g087800.3;gene_Solyc09g007900.5;gene_Solyc02g087780.3;gene_Solyc07g019670.4;gene_Solyc02g087810.3;gene_Solyc10g007570.4;gene_Solyc02g087770.3;gene_Solyc10g049970.2;gene_Solyc02g089630.3	Solyc10g011925.2;Solyc02g070430.4;Solyc04g009960.3;Solyc02g087800.3;Solyc09g007900.5;Solyc02g087780.3;Solyc07g019670.4;Solyc02g087810.3;Solyc10g007570.4;Solyc02g087770.3;Solyc10g049970.2;Solyc02g089630.3
4	GO:0006012	BP	galactose metabolic process	4/380	25/27940	0.000339804	0.083154	gene_Solyc02g087770.3;gene_Solyc02g087810.3;gene_Solyc02g087800.3;gene_Solyc02g087780.3	Solyc02g087770.3;Solyc02g087810.3;Solyc02g087800.3;Solyc02g087780.3
4	GO:0072348	BP	sulfur compound transport	4/380	25/27940	0.000339804	0.083154	gene_Solyc05g051400.5;gene_Solyc04g054730.3;gene_Solyc02g093700.3;gene_Solyc04g072760.3	Solyc05g051400.5;Solyc04g054730.3;Solyc02g093700.3;Solyc04g072760.3
5	GO:0051259	BP	protein complex oligomerization	5/380	45/27940	0.000354148	0.083154	gene_Solyc10g086680.1;gene_Solyc04g014480.3;gene_Solyc12g010020.3;gene_Solyc08g081230.1;gene_Solyc06g076560.2	Solyc10g086680.1;Solyc04g014480.3;Solyc12g010020.3;Solyc08g081230.1;Solyc06g076560.2
5	GO:0016854	MF	racemase and epimerase activity	5/380	45/27940	0.000354148	0.083154	gene_Solyc07g019670.4;gene_Solyc02g087770.3;gene_Solyc02g087810.3;gene_Solyc02g087800.3;gene_Solyc02g087780.3	Solyc07g019670.4;Solyc02g087770.3;Solyc02g087810.3;Solyc02g087800.3;Solyc02g087780.3
4	GO:0016857	MF	racemase and epimerase activity, acting on carbohydrates and derivatives	4/380	30/27940	0.000697745	0.129382	gene_Solyc02g087770.3;gene_Solyc02g087810.3;gene_Solyc02g087800.3;gene_Solyc02g087780.3	Solyc02g087770.3;Solyc02g087810.3;Solyc02g087800.3;Solyc02g087780.3
4	GO:1901682	MF	sulfur compound transmembrane transporter activity	4/380	30/27940	0.000697745	0.129382	gene_Solyc05g051400.5;gene_Solyc04g054730.3;gene_Solyc02g093700.3;gene_Solyc04g072760.3	Solyc05g051400.5;Solyc04g054730.3;Solyc02g093700.3;Solyc04g072760.3
3	GO:0010200	BP	response to chitin	3/380	14/27940	0.000812732	0.139147	gene_Solyc01g098420.3;gene_Solyc05g052570.3;gene_Solyc05g052550.1	Solyc01g098420.3;Solyc05g052570.3;Solyc05g052550.1
11	GO:0000160	BP	phosphorelay signal transduction system	11/380	260/27940	0.000933831	0.147581	gene_Solyc05g052050.1;gene_Solyc08g080290.5;gene_Solyc12g009240.1;gene_Solyc08g066350.2;gene_Solyc12g038800.1;gene_Solyc01g006650.2;gene_Solyc10g006130.1;gene_Solyc05g052040.1;gene_Solyc10g084340.2;gene_Solyc02g071220.3;gene_Solyc08g078190.3	Solyc05g052050.1;Solyc08g080290.5;Solyc12g009240.1;Solyc08g066350.2;Solyc12g038800.1;Solyc01g006650.2;Solyc10g006130.1;Solyc05g052040.1;Solyc10g084340.2;Solyc02g071220.3;Solyc08g078190.3
19	GO:0030246	MF	carbohydrate binding	19/380	604/27940	0.000922152	0.147581	gene_Solyc09g089740.3;gene_Solyc03g083480.5;gene_Solyc03g083470.3;gene_Solyc03g094020.3;gene_Solyc10g084860.1;gene_Solyc02g087800.3;gene_Solyc02g087810.3;gene_Solyc02g087780.3;gene_Solyc07g053810.3;gene_Solyc10g007570.4;gene_Solyc01g067620.3;gene_Solyc11g013110.2;gene_Solyc07g062490.1;gene_Solyc09g075910.1;gene_Solyc02g087770.3;gene_Solyc02g070430.4;gene_Solyc04g077270.4;gene_Solyc05g008105.1;gen…	Solyc09g089740.3;Solyc03g083480.5;Solyc03g083470.3;Solyc03g094020.3;Solyc10g084860.1;Solyc02g087800.3;Solyc02g087810.3;Solyc02g087780.3;Solyc07g053810.3;Solyc10g007570.4;Solyc01g067620.3;Solyc11g013110.2;Solyc07g062490.1;Solyc09g075910.1;Solyc02g087770.3;Solyc02g070430.4;Solyc04g077270.4;Solyc05g008105.1;Solyc02g081480.4
3	GO:0006662	BP	glycerol ether metabolic process	3/380	15/27940	0.00100571	0.155942	gene_Solyc05g006850.4;gene_Solyc05g006830.3;gene_Solyc05g006855.1	Solyc05g006850.4;Solyc05g006830.3;Solyc05g006855.1
18	GO:0030234	MF	enzyme regulator activity	18/380	561/27940	0.00118132	0.177948	gene_Solyc11g021060.2;gene_Solyc03g034440.2;gene_Solyc09g084470.3;gene_Solyc03g098790.3;gene_Solyc03g083730.1;gene_Solyc03g098795.1;gene_Solyc06g005460.1;gene_Solyc03g098730.1;gene_Solyc11g022590.1;gene_Solyc09g089500.3;gene_Solyc09g083435.1;gene_Solyc03g112970.1;gene_Solyc11g021020.1;gene_Solyc09g084480.3;gene_Solyc03g098780.2;gene_Solyc10g086580.2;gene_Solyc08g014570.3;gene_Solyc09g084450.3	Solyc11g021060.2;Solyc03g034440.2;Solyc09g084470.3;Solyc03g098790.3;Solyc03g083730.1;Solyc03g098795.1;Solyc06g005460.1;Solyc03g098730.1;Solyc11g022590.1;Solyc09g089500.3;Solyc09g083435.1;Solyc03g112970.1;Solyc11g021020.1;Solyc09g084480.3;Solyc03g098780.2;Solyc10g086580.2;Solyc08g014570.3;Solyc09g084450.3
9	GO:0009873	BP	ethylene-activated signaling pathway	9/380	192/27940	0.00132385	0.190866	gene_Solyc05g052050.1;gene_Solyc08g080290.5;gene_Solyc12g009240.1;gene_Solyc12g038800.1;gene_Solyc01g006650.2;gene_Solyc10g006130.1;gene_Solyc05g052040.1;gene_Solyc10g084340.2;gene_Solyc08g078190.3	Solyc05g052050.1;Solyc08g080290.5;Solyc12g009240.1;Solyc12g038800.1;Solyc01g006650.2;Solyc10g006130.1;Solyc05g052040.1;Solyc10g084340.2;Solyc08g078190.3
3	GO:0008272	BP	sulfate transport	3/380	17/27940	0.00147301	0.208711	gene_Solyc05g051400.5;gene_Solyc04g054730.3;gene_Solyc04g072760.3	Solyc05g051400.5;Solyc04g054730.3;Solyc04g072760.3
6	GO:0015035	MF	protein-disulfide reductase activity	6/380	92/27940	0.00162391	0.226192	gene_Solyc01g108020.3;gene_Solyc02g087850.1;gene_Solyc05g006850.4;gene_Solyc05g006830.3;gene_Solyc06g008760.1;gene_Solyc05g006855.1	Solyc01g108020.3;Solyc02g087850.1;Solyc05g006850.4;Solyc05g006830.3;Solyc06g008760.1;Solyc05g006855.1
3	GO:0018904	BP	ether metabolic process	3/380	18/27940	0.00174989	0.228264	gene_Solyc05g006850.4;gene_Solyc05g006830.3;gene_Solyc05g006855.1	Solyc05g006850.4;Solyc05g006830.3;Solyc05g006855.1
3	GO:0015116	MF	sulfate transmembrane transporter activity	3/380	18/27940	0.00174989	0.228264	gene_Solyc05g051400.5;gene_Solyc04g054730.3;gene_Solyc04g072760.3	Solyc05g051400.5;Solyc04g054730.3;Solyc04g072760.3
18	GO:0098772	MF	molecular function regulator activity	18/380	612/27940	0.00219229	0.277173	gene_Solyc11g021060.2;gene_Solyc03g034440.2;gene_Solyc09g084470.3;gene_Solyc03g098790.3;gene_Solyc03g083730.1;gene_Solyc03g098795.1;gene_Solyc06g005460.1;gene_Solyc03g098730.1;gene_Solyc11g022590.1;gene_Solyc09g089500.3;gene_Solyc09g083435.1;gene_Solyc03g112970.1;gene_Solyc11g021020.1;gene_Solyc09g084480.3;gene_Solyc03g098780.2;gene_Solyc10g086580.2;gene_Solyc08g014570.3;gene_Solyc09g084450.3	Solyc11g021060.2;Solyc03g034440.2;Solyc09g084470.3;Solyc03g098790.3;Solyc03g083730.1;Solyc03g098795.1;Solyc06g005460.1;Solyc03g098730.1;Solyc11g022590.1;Solyc09g089500.3;Solyc09g083435.1;Solyc03g112970.1;Solyc11g021020.1;Solyc09g084480.3;Solyc03g098780.2;Solyc10g086580.2;Solyc08g014570.3;Solyc09g084450.3
23	GO:0005576	CC	extracellular region	23/380	863/27940	0.00236797	0.282029	gene_Solyc09g097770.3;gene_Solyc09g072700.4;gene_Solyc07g053810.3;gene_Solyc06g005460.1;gene_Solyc04g054690.3;gene_Solyc09g084480.3;gene_Solyc09g084470.3;gene_Solyc06g049050.3;gene_Solyc03g112970.1;gene_Solyc05g016310.1;gene_Solyc04g071890.4;gene_Solyc07g055990.3;gene_Solyc07g006560.3;gene_Solyc11g013300.2;gene_Solyc03g083730.1;gene_Solyc08g080620.1;gene_Solyc11g068880.2;gene_Solyc04g078195.1;gen…	Solyc09g097770.3;Solyc09g072700.4;Solyc07g053810.3;Solyc06g005460.1;Solyc04g054690.3;Solyc09g084480.3;Solyc09g084470.3;Solyc06g049050.3;Solyc03g112970.1;Solyc05g016310.1;Solyc04g071890.4;Solyc07g055990.3;Solyc07g006560.3;Solyc11g013300.2;Solyc03g083730.1;Solyc08g080620.1;Solyc11g068880.2;Solyc04g078195.1;Solyc09g084450.3;Solyc08g080650.3;Solyc09g083435.1;Solyc06g083040.3;Solyc11g018774.2
6	GO:0015036	MF	disulfide oxidoreductase activity	6/380	99/27940	0.00235781	0.282029	gene_Solyc01g108020.3;gene_Solyc02g087850.1;gene_Solyc05g006850.4;gene_Solyc05g006830.3;gene_Solyc06g008760.1;gene_Solyc05g006855.1	Solyc01g108020.3;Solyc02g087850.1;Solyc05g006850.4;Solyc05g006830.3;Solyc06g008760.1;Solyc05g006855.1
8	GO:0016054	BP	organic acid catabolic process	8/380	172/27940	0.00254029	0.298165	gene_Solyc10g011925.2;gene_Solyc10g049970.2;gene_Solyc04g009960.3;gene_Solyc07g019670.4;gene_Solyc09g007900.5;gene_Solyc10g007570.4;gene_Solyc02g070430.4;gene_Solyc02g089630.3	Solyc10g011925.2;Solyc10g049970.2;Solyc04g009960.3;Solyc07g019670.4;Solyc09g007900.5;Solyc10g007570.4;Solyc02g070430.4;Solyc02g089630.3
63	GO:0050896	BP	response to stimulus	63/380	3200/27940	0.00259101	0.298165	gene_Solyc05g052050.1;gene_Solyc08g080290.5;gene_Solyc09g097770.3;gene_Solyc09g072700.4;gene_Solyc10g084860.1;gene_Solyc04g079350.1;gene_Solyc10g086680.1;gene_Solyc05g012580.1;gene_Solyc05g052040.1;gene_Solyc10g007570.4;gene_Solyc07g042490.1;gene_Solyc12g089240.2;gene_Solyc12g049400.2;gene_Solyc08g078190.3;gene_Solyc04g014480.3;gene_Solyc02g085933.1;gene_Solyc09g084480.3;gene_Solyc09g084470.3;gen…	Solyc05g052050.1;Solyc08g080290.5;Solyc09g097770.3;Solyc09g072700.4;Solyc10g084860.1;Solyc04g079350.1;Solyc10g086680.1;Solyc05g012580.1;Solyc05g052040.1;Solyc10g007570.4;Solyc07g042490.1;Solyc12g089240.2;Solyc12g049400.2;Solyc08g078190.3;Solyc04g014480.3;Solyc02g085933.1;Solyc09g084480.3;Solyc09g084470.3;Solyc02g070430.4;Solyc06g083130.5;Solyc05g052550.1;Solyc06g076170.5;Solyc12g011450.2;Solyc05g…
52	GO:0016491	MF	oxidoreductase activity	52/380	2516/27940	0.00273246	0.307608	gene_Solyc00g500260.1;gene_Solyc09g089740.3;gene_Solyc08g075490.5;gene_Solyc06g083470.5;gene_Solyc00g500068.1;gene_Solyc09g072700.4;gene_Solyc02g089780.3;gene_Solyc02g087850.1;gene_Solyc04g054690.3;gene_Solyc01g096430.4;gene_Solyc10g007570.4;gene_Solyc03g115220.5;gene_Solyc00g500021.1;gene_Solyc02g085933.1;gene_Solyc07g019670.4;gene_Solyc08g068800.4;gene_Solyc08g083500.2;gene_Solyc05g006850.4;gen…	Solyc00g500260.1;Solyc09g089740.3;Solyc08g075490.5;Solyc06g083470.5;Solyc00g500068.1;Solyc09g072700.4;Solyc02g089780.3;Solyc02g087850.1;Solyc04g054690.3;Solyc01g096430.4;Solyc10g007570.4;Solyc03g115220.5;Solyc00g500021.1;Solyc02g085933.1;Solyc07g019670.4;Solyc08g068800.4;Solyc08g083500.2;Solyc05g006850.4;Solyc09g059240.3;Solyc11g071600.2;Solyc01g067620.3;Solyc10g084590.2;Solyc05g006830.3;Solyc01g…
4	GO:0016840	MF	carbon-nitrogen lyase activity	4/380	45/27940	0.00323258	0.349544	gene_Solyc08g006150.3;gene_Solyc10g011925.2;gene_Solyc03g097230.1;gene_Solyc09g007900.5	Solyc08g006150.3;Solyc10g011925.2;Solyc03g097230.1;Solyc09g007900.5
6	GO:0009523	CC	photosystem II	6/380	106/27940	0.00331711	0.354026	gene_Solyc00g500021.1;gene_Solyc00g500068.1;gene_Solyc12g011450.2;gene_Solyc01g105030.3;gene_Solyc03g115900.5;gene_Solyc00g500083.1	Solyc00g500021.1;Solyc00g500068.1;Solyc12g011450.2;Solyc01g105030.3;Solyc03g115900.5;Solyc00g500083.1
2	GO:0016842	MF	amidine-lyase activity	2/380	7/27940	0.00370317	0.387517	gene_Solyc08g006150.3;gene_Solyc03g097230.1	Solyc08g006150.3;Solyc03g097230.1
3	GO:2000022	BP	regulation of jasmonic acid mediated signaling pathway	3/380	24/27940	0.00408635	0.411351	gene_Solyc01g005440.4;gene_Solyc12g049400.2;gene_Solyc11g011030.2	Solyc01g005440.4;Solyc12g049400.2;Solyc11g011030.2
15	GO:0016829	MF	lyase activity	15/380	485/27940	0.0041045	0.411351	gene_Solyc02g085933.1;gene_Solyc04g009960.3;gene_Solyc08g083110.4;gene_Solyc07g019670.4;gene_Solyc03g097230.1;gene_Solyc08g068680.4;gene_Solyc09g007900.5;gene_Solyc10g011925.2;gene_Solyc08g068600.3;gene_Solyc01g105920.3;gene_Solyc09g083007.1;gene_Solyc08g006150.3;gene_Solyc08g068610.3;gene_Solyc03g006550.4;gene_Solyc07g006560.3	Solyc02g085933.1;Solyc04g009960.3;Solyc08g083110.4;Solyc07g019670.4;Solyc03g097230.1;Solyc08g068680.4;Solyc09g007900.5;Solyc10g011925.2;Solyc08g068600.3;Solyc01g105920.3;Solyc09g083007.1;Solyc08g006150.3;Solyc08g068610.3;Solyc03g006550.4;Solyc07g006560.3
7	GO:0008509	MF	anion transmembrane transporter activity	7/380	149/27940	0.00439656	0.435312	gene_Solyc05g051400.5;gene_Solyc05g045670.4;gene_Solyc05g013180.4;gene_Solyc04g054730.3;gene_Solyc02g093700.3;gene_Solyc04g072760.3;gene_Solyc10g051120.3	Solyc05g051400.5;Solyc05g045670.4;Solyc05g013180.4;Solyc04g054730.3;Solyc02g093700.3;Solyc04g072760.3;Solyc10g051120.3
4	GO:0006006	BP	glucose metabolic process	4/380	51/27940	0.0050873	0.486132	gene_Solyc02g087770.3;gene_Solyc02g087810.3;gene_Solyc02g087800.3;gene_Solyc02g087780.3	Solyc02g087770.3;Solyc02g087810.3;Solyc02g087800.3;Solyc02g087780.3
8	GO:0015935	CC	small ribosomal subunit	8/380	195/27940	0.00541574	0.500074	gene_Solyc00g500301.1;gene_Solyc00g500044.1;gene_Solyc00g500325.1;gene_Solyc00g500137.1;gene_Solyc00g500039.1;gene_Solyc00g500207.1;gene_Solyc00g500055.1;gene_Solyc00g500083.1	Solyc00g500301.1;Solyc00g500044.1;Solyc00g500325.1;Solyc00g500137.1;Solyc00g500039.1;Solyc00g500207.1;Solyc00g500055.1;Solyc00g500083.1
8	GO:0009521	CC	photosystem	8/380	195/27940	0.00541574	0.500074	gene_Solyc00g500021.1;gene_Solyc00g500068.1;gene_Solyc06g009940.1;gene_Solyc12g011450.2;gene_Solyc02g020960.3;gene_Solyc00g500083.1;gene_Solyc03g115900.5;gene_Solyc01g105030.3	Solyc00g500021.1;Solyc00g500068.1;Solyc06g009940.1;Solyc12g011450.2;Solyc02g020960.3;Solyc00g500083.1;Solyc03g115900.5;Solyc01g105030.3
9	GO:0019748	BP	secondary metabolic process	9/380	238/27940	0.00553489	0.505397	gene_Solyc02g093230.4;gene_Solyc10g011925.2;gene_Solyc02g093250.3;gene_Solyc04g077640.4;gene_Solyc03g080180.5;gene_Solyc09g007900.5;gene_Solyc06g035960.3;gene_Solyc06g083040.3;gene_Solyc01g006640.1	Solyc02g093230.4;Solyc10g011925.2;Solyc02g093250.3;Solyc04g077640.4;Solyc03g080180.5;Solyc09g007900.5;Solyc06g035960.3;Solyc06g083040.3;Solyc01g006640.1
5	GO:0031347	BP	regulation of defense response	5/380	85/27940	0.0061147	0.523444	gene_Solyc01g005440.4;gene_Solyc06g071810.1;gene_Solyc12g049400.2;gene_Solyc11g011030.2;gene_Solyc01g098420.3	Solyc01g005440.4;Solyc06g071810.1;Solyc12g049400.2;Solyc11g011030.2;Solyc01g098420.3
15	GO:0035556	BP	intracellular signal transduction	15/380	523/27940	0.00644184	0.540195	gene_Solyc05g052050.1;gene_Solyc08g080290.5;gene_Solyc12g009240.1;gene_Solyc08g066350.2;gene_Solyc12g038800.1;gene_Solyc05g047600.5;gene_Solyc10g006130.1;gene_Solyc01g006650.2;gene_Solyc06g005170.3;gene_Solyc05g052040.1;gene_Solyc01g098420.3;gene_Solyc10g084340.2;gene_Solyc02g071220.3;gene_Solyc08g078190.3;gene_Solyc02g068680.1	Solyc05g052050.1;Solyc08g080290.5;Solyc12g009240.1;Solyc08g066350.2;Solyc12g038800.1;Solyc05g047600.5;Solyc10g006130.1;Solyc01g006650.2;Solyc06g005170.3;Solyc05g052040.1;Solyc01g098420.3;Solyc10g084340.2;Solyc02g071220.3;Solyc08g078190.3;Solyc02g068680.1
3	GO:0009074	BP	aromatic amino acid family catabolic process	3/380	29/27940	0.00701693	0.576651	gene_Solyc10g011925.2;gene_Solyc10g049970.2;gene_Solyc09g007900.5	Solyc10g011925.2;Solyc10g049970.2;Solyc09g007900.5
6	GO:0016667	MF	oxidoreductase activity, acting on a sulfur group of donors	6/380	125/27940	0.0073677	0.596908	gene_Solyc01g108020.3;gene_Solyc02g087850.1;gene_Solyc05g006850.4;gene_Solyc05g006830.3;gene_Solyc06g008760.1;gene_Solyc05g006855.1	Solyc01g108020.3;Solyc02g087850.1;Solyc05g006850.4;Solyc05g006830.3;Solyc06g008760.1;Solyc05g006855.1
6	GO:0045454	BP	cell redox homeostasis	6/380	126/27940	0.00764991	0.602386	gene_Solyc01g108020.3;gene_Solyc02g087850.1;gene_Solyc05g006850.4;gene_Solyc05g006830.3;gene_Solyc06g008760.1;gene_Solyc05g006855.1	Solyc01g108020.3;Solyc02g087850.1;Solyc05g006850.4;Solyc05g006830.3;Solyc06g008760.1;Solyc05g006855.1
2	GO:0008753	MF	NADPH dehydrogenase (quinone) activity	2/380	10/27940	0.00772397	0.602386	gene_Solyc01g096420.3;gene_Solyc01g096430.4	Solyc01g096420.3;Solyc01g096430.4
3	GO:0009768	BP	photosynthesis, light harvesting in photosystem I	3/380	31/27940	0.00846118	0.637926	gene_Solyc12g011450.2;gene_Solyc03g115900.5;gene_Solyc01g105030.3	Solyc12g011450.2;Solyc03g115900.5;Solyc01g105030.3
14	GO:0009755	BP	hormone-mediated signaling pathway	14/380	489/27940	0.00872568	0.646015	gene_Solyc05g052050.1;gene_Solyc08g080290.5;gene_Solyc12g009240.1;gene_Solyc08g066350.2;gene_Solyc02g037550.3;gene_Solyc01g006650.2;gene_Solyc10g006130.1;gene_Solyc04g082830.3;gene_Solyc12g038800.1;gene_Solyc05g052040.1;gene_Solyc04g012185.2;gene_Solyc10g084340.2;gene_Solyc08g078190.3;gene_Solyc06g006010.4	Solyc05g052050.1;Solyc08g080290.5;Solyc12g009240.1;Solyc08g066350.2;Solyc02g037550.3;Solyc01g006650.2;Solyc10g006130.1;Solyc04g082830.3;Solyc12g038800.1;Solyc05g052040.1;Solyc04g012185.2;Solyc10g084340.2;Solyc08g078190.3;Solyc06g006010.4
13	GO:0006820	BP	anion transport	13/380	429/27940	0.00897724	0.64925	gene_Solyc10g024490.2;gene_Solyc11g008200.2;gene_Solyc05g051400.5;gene_Solyc09g090070.1;gene_Solyc02g063020.4;gene_Solyc01g080870.3;gene_Solyc07g008200.3;gene_Solyc05g013180.4;gene_Solyc04g054730.3;gene_Solyc03g093410.3;gene_Solyc02g093700.3;gene_Solyc04g072760.3;gene_Solyc10g051120.3	Solyc10g024490.2;Solyc11g008200.2;Solyc05g051400.5;Solyc09g090070.1;Solyc02g063020.4;Solyc01g080870.3;Solyc07g008200.3;Solyc05g013180.4;Solyc04g054730.3;Solyc03g093410.3;Solyc02g093700.3;Solyc04g072760.3;Solyc10g051120.3
27	GO:0006468	BP	protein phosphorylation	27/380	1167/27940	0.00900485	0.64925	gene_Solyc06g071810.1;gene_Solyc05g025820.5;gene_Solyc10g084860.1;gene_Solyc02g086960.2;gene_Solyc06g007440.4;gene_Solyc02g031900.3;gene_Solyc07g056400.1;gene_Solyc03g115610.3;gene_Solyc05g009010.1;gene_Solyc03g083470.3;gene_Solyc09g015830.3;gene_Solyc01g098420.3;gene_Solyc05g009090.3;gene_Solyc06g005170.3;gene_Solyc09g011330.3;gene_Solyc02g081480.4;gene_Solyc02g079600.3;gene_Solyc05g047600.5;gen…	Solyc06g071810.1;Solyc05g025820.5;Solyc10g084860.1;Solyc02g086960.2;Solyc06g007440.4;Solyc02g031900.3;Solyc07g056400.1;Solyc03g115610.3;Solyc05g009010.1;Solyc03g083470.3;Solyc09g015830.3;Solyc01g098420.3;Solyc05g009090.3;Solyc06g005170.3;Solyc09g011330.3;Solyc02g081480.4;Solyc02g079600.3;Solyc05g047600.5;Solyc05g050490.4;Solyc09g075910.1;Solyc01g111880.4;Solyc02g090970.1;Solyc05g005060.3;Solyc11g…
29	GO:0016310	BP	phosphorylation	29/380	1289/27940	0.00900639	0.64925	gene_Solyc06g071810.1;gene_Solyc05g025820.5;gene_Solyc10g084860.1;gene_Solyc02g086960.2;gene_Solyc06g007440.4;gene_Solyc02g031900.3;gene_Solyc07g056400.1;gene_Solyc03g115610.3;gene_Solyc05g009010.1;gene_Solyc03g083470.3;gene_Solyc09g015830.3;gene_Solyc08g066350.2;gene_Solyc01g098420.3;gene_Solyc05g009090.3;gene_Solyc06g005170.3;gene_Solyc09g011330.3;gene_Solyc02g081480.4;gene_Solyc02g079600.3;gen…	Solyc06g071810.1;Solyc05g025820.5;Solyc10g084860.1;Solyc02g086960.2;Solyc06g007440.4;Solyc02g031900.3;Solyc07g056400.1;Solyc03g115610.3;Solyc05g009010.1;Solyc03g083470.3;Solyc09g015830.3;Solyc08g066350.2;Solyc01g098420.3;Solyc05g009090.3;Solyc06g005170.3;Solyc09g011330.3;Solyc02g081480.4;Solyc02g079600.3;Solyc05g047600.5;Solyc05g050490.4;Solyc09g075910.1;Solyc01g111880.4;Solyc02g090970.1;Solyc03g…
3	GO:0009765	BP	photosynthesis, light harvesting	3/380	32/27940	0.00924377	0.660568	gene_Solyc12g011450.2;gene_Solyc03g115900.5;gene_Solyc01g105030.3	Solyc12g011450.2;Solyc03g115900.5;Solyc01g105030.3
25	GO:0006952	BP	defense response	25/380	1062/27940	0.0093423	0.661854	gene_Solyc05g052050.1;gene_Solyc08g080290.5;gene_Solyc09g097770.3;gene_Solyc10g084860.1;gene_Solyc04g150104.1;gene_Solyc05g052040.1;gene_Solyc08g078190.3;gene_Solyc02g085933.1;gene_Solyc08g080650.3;gene_Solyc01g098420.3;gene_Solyc10g084340.2;gene_Solyc07g049700.1;gene_Solyc06g005170.3;gene_Solyc03g093550.1;gene_Solyc11g013300.2;gene_Solyc12g009240.1;gene_Solyc08g080620.1;gene_Solyc03g093540.1;gen…	Solyc05g052050.1;Solyc08g080290.5;Solyc09g097770.3;Solyc10g084860.1;Solyc04g150104.1;Solyc05g052040.1;Solyc08g078190.3;Solyc02g085933.1;Solyc08g080650.3;Solyc01g098420.3;Solyc10g084340.2;Solyc07g049700.1;Solyc06g005170.3;Solyc03g093550.1;Solyc11g013300.2;Solyc12g009240.1;Solyc08g080620.1;Solyc03g093540.1;Solyc04g078195.1;Solyc04g056570.3;Solyc12g038800.1;Solyc10g006130.1;Solyc06g076170.5;Solyc03g…
3	GO:0008300	BP	isoprenoid catabolic process	3/380	33/27940	0.0100673	0.707117	gene_Solyc10g007570.4;gene_Solyc02g070430.4;gene_Solyc08g075490.5	Solyc10g007570.4;Solyc02g070430.4;Solyc08g075490.5
9	GO:0006979	BP	response to oxidative stress	9/380	263/27940	0.01031	0.718032	gene_Solyc04g014480.3;gene_Solyc04g071890.4;gene_Solyc09g072700.4;gene_Solyc08g068800.4;gene_Solyc06g076560.2;gene_Solyc10g086680.1;gene_Solyc02g087350.3;gene_Solyc11g018774.2;gene_Solyc01g006640.1	Solyc04g014480.3;Solyc04g071890.4;Solyc09g072700.4;Solyc08g068800.4;Solyc06g076560.2;Solyc10g086680.1;Solyc02g087350.3;Solyc11g018774.2;Solyc01g006640.1
11	GO:0015698	BP	inorganic anion transport	11/380	360/27940	0.0108312	0.721094	gene_Solyc10g024490.2;gene_Solyc11g008200.2;gene_Solyc05g051400.5;gene_Solyc09g090070.1;gene_Solyc02g063020.4;gene_Solyc01g080870.3;gene_Solyc07g008200.3;gene_Solyc05g013180.4;gene_Solyc04g054730.3;gene_Solyc03g093410.3;gene_Solyc04g072760.3	Solyc10g024490.2;Solyc11g008200.2;Solyc05g051400.5;Solyc09g090070.1;Solyc02g063020.4;Solyc01g080870.3;Solyc07g008200.3;Solyc05g013180.4;Solyc04g054730.3;Solyc03g093410.3;Solyc04g072760.3
5	GO:1901606	BP	alpha-amino acid catabolic process	5/380	98/27940	0.0109826	0.721094	gene_Solyc09g007900.5;gene_Solyc10g011925.2;gene_Solyc10g049970.2;gene_Solyc02g089630.3;gene_Solyc04g009960.3	Solyc09g007900.5;Solyc10g011925.2;Solyc10g049970.2;Solyc02g089630.3;Solyc04g009960.3
6	GO:0080134	BP	regulation of response to stress	6/380	137/27940	0.0112878	0.721094	gene_Solyc01g005440.4;gene_Solyc11g011030.2;gene_Solyc06g071810.1;gene_Solyc01g098420.3;gene_Solyc12g049400.2;gene_Solyc06g005170.3	Solyc01g005440.4;Solyc11g011030.2;Solyc06g071810.1;Solyc01g098420.3;Solyc12g049400.2;Solyc06g005170.3
3	GO:0042542	BP	response to hydrogen peroxide	3/380	35/27940	0.0118384	0.721094	gene_Solyc10g086680.1;gene_Solyc04g014480.3;gene_Solyc06g076560.2	Solyc10g086680.1;Solyc04g014480.3;Solyc06g076560.2
47	GO:0006950	BP	response to stress	47/380	2409/27940	0.0125889	0.721094	gene_Solyc05g052050.1;gene_Solyc08g080290.5;gene_Solyc09g097770.3;gene_Solyc09g072700.4;gene_Solyc10g084860.1;gene_Solyc04g150104.1;gene_Solyc10g086680.1;gene_Solyc05g012580.1;gene_Solyc05g052040.1;gene_Solyc08g078190.3;gene_Solyc04g014480.3;gene_Solyc02g085933.1;gene_Solyc09g084480.3;gene_Solyc09g084470.3;gene_Solyc06g083130.5;gene_Solyc11g011030.2;gene_Solyc06g076170.5;gene_Solyc05g013180.4;gen…	Solyc05g052050.1;Solyc08g080290.5;Solyc09g097770.3;Solyc09g072700.4;Solyc10g084860.1;Solyc04g150104.1;Solyc10g086680.1;Solyc05g012580.1;Solyc05g052040.1;Solyc08g078190.3;Solyc04g014480.3;Solyc02g085933.1;Solyc09g084480.3;Solyc09g084470.3;Solyc06g083130.5;Solyc11g011030.2;Solyc06g076170.5;Solyc05g013180.4;Solyc01g098420.3;Solyc10g084340.2;Solyc04g071890.4;Solyc07g049700.1;Solyc06g005170.3;Solyc03g…
2	GO:0016103	BP	diterpenoid catabolic process	2/380	13/27940	0.0130328	0.721094	gene_Solyc10g007570.4;gene_Solyc02g070430.4	Solyc10g007570.4;Solyc02g070430.4
2	GO:0045487	BP	gibberellin catabolic process	2/380	13/27940	0.0130328	0.721094	gene_Solyc10g007570.4;gene_Solyc02g070430.4	Solyc10g007570.4;Solyc02g070430.4
1	GO:0140455	BP	cytoplasm protein quality control	1/380	1/27940	0.0136006	0.721094	gene_Solyc05g007895.1	Solyc05g007895.1
1	GO:0071497	BP	cellular response to freezing	1/380	1/27940	0.0136006	0.721094	gene_Solyc05g052950.5	Solyc05g052950.5
1	GO:0002752	BP	cell surface pattern recognition receptor signaling pathway	1/380	1/27940	0.0136006	0.721094	gene_Solyc01g098420.3	Solyc01g098420.3
1	GO:0009595	BP	detection of biotic stimulus	1/380	1/27940	0.0136006	0.721094	gene_Solyc01g098420.3	Solyc01g098420.3
1	GO:0002429	BP	immune response-activating cell surface receptor signaling pathway	1/380	1/27940	0.0136006	0.721094	gene_Solyc01g098420.3	Solyc01g098420.3
1	GO:0002768	BP	immune response-regulating cell surface receptor signaling pathway	1/380	1/27940	0.0136006	0.721094	gene_Solyc01g098420.3	Solyc01g098420.3
1	GO:1901141	BP	regulation of lignin biosynthetic process	1/380	1/27940	0.0136006	0.721094	gene_Solyc05g052950.5	Solyc05g052950.5
1	GO:0071629	BP	cytoplasm protein quality control by the ubiquitin-proteasome system	1/380	1/27940	0.0136006	0.721094	gene_Solyc05g007895.1	Solyc05g007895.1
1	GO:0098581	BP	detection of external biotic stimulus	1/380	1/27940	0.0136006	0.721094	gene_Solyc01g098420.3	Solyc01g098420.3
1	GO:0071219	BP	cellular response to molecule of bacterial origin	1/380	1/27940	0.0136006	0.721094	gene_Solyc01g098420.3	Solyc01g098420.3
1	GO:0002220	BP	innate immune response activating cell surface receptor signaling pathway	1/380	1/27940	0.0136006	0.721094	gene_Solyc01g098420.3	Solyc01g098420.3
1	GO:0032499	BP	detection of peptidoglycan	1/380	1/27940	0.0136006	0.721094	gene_Solyc01g098420.3	Solyc01g098420.3
1	GO:0032494	BP	response to peptidoglycan	1/380	1/27940	0.0136006	0.721094	gene_Solyc01g098420.3	Solyc01g098420.3
1	GO:0032490	BP	detection of molecule of bacterial origin	1/380	1/27940	0.0136006	0.721094	gene_Solyc01g098420.3	Solyc01g098420.3
1	GO:0032491	BP	detection of molecule of fungal origin	1/380	1/27940	0.0136006	0.721094	gene_Solyc01g098420.3	Solyc01g098420.3
5	GO:0009522	CC	photosystem I	5/380	101/27940	0.0123977	0.721094	gene_Solyc12g011450.2;gene_Solyc02g020960.3;gene_Solyc03g115900.5;gene_Solyc01g105030.3;gene_Solyc06g009940.1	Solyc12g011450.2;Solyc02g020960.3;Solyc03g115900.5;Solyc01g105030.3;Solyc06g009940.1
2	GO:0016160	MF	amylase activity	2/380	13/27940	0.0130328	0.721094	gene_Solyc04g082090.3;gene_Solyc01g067660.3	Solyc04g082090.3;Solyc01g067660.3
2	GO:0052634	MF	C-19 gibberellin 2-beta-dioxygenase activity	2/380	13/27940	0.0130328	0.721094	gene_Solyc10g007570.4;gene_Solyc02g070430.4	Solyc10g007570.4;Solyc02g070430.4
1	GO:0008732	MF	L-allo-threonine aldolase activity	1/380	1/27940	0.0136006	0.721094	gene_Solyc04g009960.3	Solyc04g009960.3
1	GO:0033799	MF	myricetin 3'-O-methyltransferase activity	1/380	1/27940	0.0136006	0.721094	gene_Solyc03g080180.5	Solyc03g080180.5
1	GO:0030744	MF	luteolin O-methyltransferase activity	1/380	1/27940	0.0136006	0.721094	gene_Solyc03g080180.5	Solyc03g080180.5
1	GO:0033840	MF	NDP-glucose-starch glucosyltransferase activity	1/380	1/27940	0.0136006	0.721094	gene_Solyc08g083320.4	Solyc08g083320.4
1	GO:0045431	MF	flavonol synthase activity	1/380	1/27940	0.0136006	0.721094	gene_Solyc11g013110.2	Solyc11g013110.2
1	GO:2001080	MF	chitosan binding	1/380	1/27940	0.0136006	0.721094	gene_Solyc01g098420.3	Solyc01g098420.3
1	GO:0102502	MF	ADP-glucose-starch glucosyltransferase activity	1/380	1/27940	0.0136006	0.721094	gene_Solyc08g083320.4	Solyc08g083320.4
1	GO:0004793	MF	threonine aldolase activity	1/380	1/27940	0.0136006	0.721094	gene_Solyc04g009960.3	Solyc04g009960.3
1	GO:0030755	MF	quercetin 3-O-methyltransferase activity	1/380	1/27940	0.0136006	0.721094	gene_Solyc03g080180.5	Solyc03g080180.5
1	GO:0047763	MF	caffeate O-methyltransferase activity	1/380	1/27940	0.0136006	0.721094	gene_Solyc03g080180.5	Solyc03g080180.5
5	GO:0009699	BP	phenylpropanoid biosynthetic process	5/380	104/27940	0.0139315	0.733904	gene_Solyc02g093230.4;gene_Solyc10g011925.2;gene_Solyc02g093250.3;gene_Solyc03g080180.5;gene_Solyc09g007900.5	Solyc02g093230.4;Solyc10g011925.2;Solyc02g093250.3;Solyc03g080180.5;Solyc09g007900.5
2	GO:0009539	CC	photosystem II reaction center	2/380	14/27940	0.0150695	0.783802	gene_Solyc00g500068.1;gene_Solyc00g500021.1	Solyc00g500068.1;Solyc00g500021.1
4	GO:0008514	MF	organic anion transmembrane transporter activity	4/380	71/27940	0.0160187	0.827936	gene_Solyc05g051400.5;gene_Solyc05g045670.4;gene_Solyc02g093700.3;gene_Solyc10g051120.3	Solyc05g051400.5;Solyc05g045670.4;Solyc02g093700.3;Solyc10g051120.3
3	GO:0046942	BP	carboxylic acid transport	3/380	40/27940	0.0170045	0.84693	gene_Solyc05g051400.5;gene_Solyc02g093700.3;gene_Solyc10g051120.3	Solyc05g051400.5;Solyc02g093700.3;Solyc10g051120.3
2	GO:0045548	MF	phenylalanine ammonia-lyase activity	2/380	15/27940	0.0172331	0.848034	gene_Solyc10g011925.2;gene_Solyc09g007900.5	Solyc10g011925.2;Solyc09g007900.5
2	GO:0045543	MF	gibberellin 2-beta-dioxygenase activity	2/380	15/27940	0.0172331	0.848034	gene_Solyc10g007570.4;gene_Solyc02g070430.4	Solyc10g007570.4;Solyc02g070430.4
5	GO:0009063	BP	cellular amino acid catabolic process	5/380	111/27940	0.0179941	0.880209	gene_Solyc09g007900.5;gene_Solyc10g011925.2;gene_Solyc10g049970.2;gene_Solyc02g089630.3;gene_Solyc04g009960.3	Solyc09g007900.5;Solyc10g011925.2;Solyc10g049970.2;Solyc02g089630.3;Solyc04g009960.3
2	GO:0030026	BP	cellular manganese ion homeostasis	2/380	16/27940	0.0195199	0.932472	gene_Solyc01g104780.3;gene_Solyc01g091850.3	Solyc01g104780.3;Solyc01g091850.3
6	GO:0046395	BP	carboxylic acid catabolic process	6/380	155/27940	0.0196298	0.932472	gene_Solyc10g011925.2;gene_Solyc10g049970.2;gene_Solyc04g009960.3;gene_Solyc09g007900.5;gene_Solyc07g019670.4;gene_Solyc02g089630.3	Solyc10g011925.2;Solyc10g049970.2;Solyc04g009960.3;Solyc09g007900.5;Solyc07g019670.4;Solyc02g089630.3
3	GO:0010181	MF	FMN binding	3/380	42/27940	0.0193705	0.932472	gene_Solyc01g096420.3;gene_Solyc01g096430.4;gene_Solyc01g103390.3	Solyc01g096420.3;Solyc01g096430.4;Solyc01g103390.3
2	GO:0008271	MF	secondary active sulfate transmembrane transporter activity	2/380	16/27940	0.0195199	0.932472	gene_Solyc04g054730.3;gene_Solyc04g072760.3	Solyc04g054730.3;Solyc04g072760.3
2	GO:0015301	MF	obsolete anion:anion antiporter activity	2/380	16/27940	0.0195199	0.932472	gene_Solyc04g054730.3;gene_Solyc04g072760.3	Solyc04g054730.3;Solyc04g072760.3
7	GO:0009698	BP	phenylpropanoid metabolic process	7/380	200/27940	0.0200555	0.942579	gene_Solyc02g093230.4;gene_Solyc10g011925.2;gene_Solyc02g093250.3;gene_Solyc03g080180.5;gene_Solyc09g007900.5;gene_Solyc06g035960.3;gene_Solyc01g006640.1	Solyc02g093230.4;Solyc10g011925.2;Solyc02g093250.3;Solyc03g080180.5;Solyc09g007900.5;Solyc06g035960.3;Solyc01g006640.1
4	GO:1990542	BP	mitochondrial transmembrane transport	4/380	76/27940	0.020072	0.942579	gene_Solyc07g015970.3;gene_Solyc06g082270.2;gene_Solyc02g087410.4;gene_Solyc10g051120.3	Solyc07g015970.3;Solyc06g082270.2;Solyc02g087410.4;Solyc10g051120.3
8	GO:0019725	BP	cellular homeostasis	8/380	248/27940	0.0207827	0.97041	gene_Solyc01g108020.3;gene_Solyc02g087850.1;gene_Solyc05g006850.4;gene_Solyc05g006830.3;gene_Solyc06g008760.1;gene_Solyc01g104780.3;gene_Solyc01g091850.3;gene_Solyc05g006855.1	Solyc01g108020.3;Solyc02g087850.1;Solyc05g006850.4;Solyc05g006830.3;Solyc06g008760.1;Solyc01g104780.3;Solyc01g091850.3;Solyc05g006855.1
2	GO:0055071	BP	manganese ion homeostasis	2/380	17/27940	0.0219262	0.984795	gene_Solyc01g104780.3;gene_Solyc01g091850.3	Solyc01g104780.3;Solyc01g091850.3
5	GO:0044550	BP	secondary metabolite biosynthetic process	5/380	117/27940	0.0220429	0.984795	gene_Solyc02g093230.4;gene_Solyc10g011925.2;gene_Solyc02g093250.3;gene_Solyc03g080180.5;gene_Solyc09g007900.5	Solyc02g093230.4;Solyc10g011925.2;Solyc02g093250.3;Solyc03g080180.5;Solyc09g007900.5
2	GO:0006880	BP	intracellular sequestering of iron ion	2/380	18/27940	0.0244482	0.984795	gene_Solyc01g104780.3;gene_Solyc01g091850.3	Solyc01g104780.3;Solyc01g091850.3
2	GO:0009800	BP	cinnamic acid biosynthetic process	2/380	18/27940	0.0244482	0.984795	gene_Solyc10g011925.2;gene_Solyc09g007900.5	Solyc10g011925.2;Solyc09g007900.5
2	GO:0009803	BP	cinnamic acid metabolic process	2/380	18/27940	0.0244482	0.984795	gene_Solyc10g011925.2;gene_Solyc09g007900.5	Solyc10g011925.2;Solyc09g007900.5
2	GO:0016115	BP	terpenoid catabolic process	2/380	18/27940	0.0244482	0.984795	gene_Solyc10g007570.4;gene_Solyc02g070430.4	Solyc10g007570.4;Solyc02g070430.4
6	GO:0015979	BP	photosynthesis	6/380	164/27940	0.0250625	0.984795	gene_Solyc11g012120.2;gene_Solyc02g085933.1;gene_Solyc06g009940.1;gene_Solyc02g020960.3;gene_Solyc02g081060.4;gene_Solyc00g500083.1	Solyc11g012120.2;Solyc02g085933.1;Solyc06g009940.1;Solyc02g020960.3;Solyc02g081060.4;Solyc00g500083.1
1	GO:0033389	BP	putrescine biosynthetic process from arginine, using agmatinase	1/380	2/27940	0.0270166	0.984795	gene_Solyc01g091170.3	Solyc01g091170.3
1	GO:1904821	BP	chloroplast disassembly	1/380	2/27940	0.0270166	0.984795	gene_Solyc08g067630.3	Solyc08g067630.3
1	GO:0015811	BP	L-cystine transport	1/380	2/27940	0.0270166	0.984795	gene_Solyc02g093700.3	Solyc02g093700.3
1	GO:0015729	BP	oxaloacetate transport	1/380	2/27940	0.0270166	0.984795	gene_Solyc05g051400.5	Solyc05g051400.5
1	GO:0071323	BP	cellular response to chitin	1/380	2/27940	0.0270166	0.984795	gene_Solyc01g098420.3	Solyc01g098420.3
1	GO:0015709	BP	thiosulfate transport	1/380	2/27940	0.0270166	0.984795	gene_Solyc05g051400.5	Solyc05g051400.5
1	GO:0015744	BP	succinate transport	1/380	2/27940	0.0270166	0.984795	gene_Solyc05g051400.5	Solyc05g051400.5
1	GO:0015804	BP	neutral amino acid transport	1/380	2/27940	0.0270166	0.984795	gene_Solyc02g093700.3	Solyc02g093700.3
1	GO:0060862	BP	negative regulation of floral organ abscission	1/380	2/27940	0.0270166	0.984795	gene_Solyc06g071810.1	Solyc06g071810.1
1	GO:0060860	BP	regulation of floral organ abscission	1/380	2/27940	0.0270166	0.984795	gene_Solyc06g071810.1	Solyc06g071810.1
1	GO:0071422	BP	succinate transmembrane transport	1/380	2/27940	0.0270166	0.984795	gene_Solyc05g051400.5	Solyc05g051400.5
1	GO:0071423	BP	malate transmembrane transport	1/380	2/27940	0.0270166	0.984795	gene_Solyc05g051400.5	Solyc05g051400.5
1	GO:0071216	BP	cellular response to biotic stimulus	1/380	2/27940	0.0270166	0.984795	gene_Solyc01g098420.3	Solyc01g098420.3
1	GO:0034214	BP	protein hexamerization	1/380	2/27940	0.0270166	0.984795	gene_Solyc12g010020.3	Solyc12g010020.3
1	GO:0000101	BP	sulfur amino acid transport	1/380	2/27940	0.0270166	0.984795	gene_Solyc02g093700.3	Solyc02g093700.3
1	GO:0061635	BP	regulation of protein complex stability	1/380	2/27940	0.0270166	0.984795	gene_Solyc05g007895.1	Solyc05g007895.1
2	GO:0051238	BP	sequestering of metal ion	2/380	19/27940	0.0270825	0.984795	gene_Solyc01g104780.3;gene_Solyc01g091850.3	Solyc01g104780.3;Solyc01g091850.3
2	GO:0097577	BP	sequestering of iron ion	2/380	19/27940	0.0270825	0.984795	gene_Solyc01g104780.3;gene_Solyc01g091850.3	Solyc01g104780.3;Solyc01g091850.3
3	GO:0043621	MF	protein self-association	3/380	46/27940	0.0246203	0.984795	gene_Solyc10g086680.1;gene_Solyc04g014480.3;gene_Solyc06g076560.2	Solyc10g086680.1;Solyc04g014480.3;Solyc06g076560.2
4	GO:0015103	MF	inorganic anion transmembrane transporter activity	4/380	81/27940	0.0247038	0.984795	gene_Solyc05g051400.5;gene_Solyc05g013180.4;gene_Solyc04g054730.3;gene_Solyc04g072760.3	Solyc05g051400.5;Solyc05g013180.4;Solyc04g054730.3;Solyc04g072760.3
1	GO:0046863	MF	ribulose-1,5-bisphosphate carboxylase/oxygenase activator activity	1/380	2/27940	0.0270166	0.984795	gene_Solyc10g086580.2	Solyc10g086580.2
1	GO:0015141	MF	succinate transmembrane transporter activity	1/380	2/27940	0.0270166	0.984795	gene_Solyc05g051400.5	Solyc05g051400.5
1	GO:0000099	MF	sulfur amino acid transmembrane transporter activity	1/380	2/27940	0.0270166	0.984795	gene_Solyc02g093700.3	Solyc02g093700.3
1	GO:0008783	MF	agmatinase activity	1/380	2/27940	0.0270166	0.984795	gene_Solyc01g091170.3	Solyc01g091170.3
1	GO:0019166	MF	trans-2-enoyl-CoA reductase (NADPH) activity	1/380	2/27940	0.0270166	0.984795	gene_Solyc12g096780.2	Solyc12g096780.2
1	GO:0015184	MF	L-cystine transmembrane transporter activity	1/380	2/27940	0.0270166	0.984795	gene_Solyc02g093700.3	Solyc02g093700.3
1	GO:0004657	MF	proline dehydrogenase activity	1/380	2/27940	0.0270166	0.984795	gene_Solyc02g089630.3	Solyc02g089630.3
1	GO:0061929	MF	gamma-glutamylaminecyclotransferase activity	1/380	2/27940	0.0270166	0.984795	gene_Solyc03g097230.1	Solyc03g097230.1
1	GO:0045486	MF	naringenin 3-dioxygenase activity	1/380	2/27940	0.0270166	0.984795	gene_Solyc11g013110.2	Solyc11g013110.2
1	GO:0015117	MF	thiosulfate transmembrane transporter activity	1/380	2/27940	0.0270166	0.984795	gene_Solyc05g051400.5	Solyc05g051400.5
1	GO:0015131	MF	oxaloacetate transmembrane transporter activity	1/380	2/27940	0.0270166	0.984795	gene_Solyc05g051400.5	Solyc05g051400.5
2	GO:0005381	MF	iron ion transmembrane transporter activity	2/380	19/27940	0.0270825	0.984795	gene_Solyc01g104780.3;gene_Solyc01g091850.3	Solyc01g104780.3;Solyc01g091850.3
2	GO:0006559	BP	L-phenylalanine catabolic process	2/380	20/27940	0.0298254	1	gene_Solyc10g011925.2;gene_Solyc09g007900.5	Solyc10g011925.2;Solyc09g007900.5
2	GO:1902222	BP	erythrose 4-phosphate/phosphoenolpyruvate family amino acid catabolic process	2/380	20/27940	0.0298254	1	gene_Solyc10g011925.2;gene_Solyc09g007900.5	Solyc10g011925.2;Solyc09g007900.5
2	GO:0043455	BP	regulation of secondary metabolic process	2/380	20/27940	0.0298254	1	gene_Solyc05g012580.1;gene_Solyc05g052950.5	Solyc05g012580.1;Solyc05g052950.5
7	GO:0009266	BP	response to temperature stimulus	7/380	219/27940	0.0308466	1	gene_Solyc04g014480.3;gene_Solyc10g085140.2;gene_Solyc06g076560.2;gene_Solyc10g086680.1;gene_Solyc05g012580.1;gene_Solyc05g052950.5;gene_Solyc06g005170.3	Solyc04g014480.3;Solyc10g085140.2;Solyc06g076560.2;Solyc10g086680.1;Solyc05g012580.1;Solyc05g052950.5;Solyc06g005170.3
8	GO:0009416	BP	response to light stimulus	8/380	275/27940	0.0353078	1	gene_Solyc02g070430.4;gene_Solyc12g011450.2;gene_Solyc10g007570.4;gene_Solyc01g105030.3;gene_Solyc11g013110.2;gene_Solyc03g115900.5;gene_Solyc06g069880.1;gene_Solyc12g089240.2	Solyc02g070430.4;Solyc12g011450.2;Solyc10g007570.4;Solyc01g105030.3;Solyc11g013110.2;Solyc03g115900.5;Solyc06g069880.1;Solyc12g089240.2
2	GO:0015977	BP	carbon fixation	2/380	22/27940	0.0356238	1	gene_Solyc02g085933.1;gene_Solyc02g081060.4	Solyc02g085933.1;Solyc02g081060.4
1	GO:0042262	BP	DNA protection	1/380	3/27940	0.0402507	1	gene_Solyc06g083130.5	Solyc06g083130.5
1	GO:0072337	BP	modified amino acid transport	1/380	3/27940	0.0402507	1	gene_Solyc02g093700.3	Solyc02g093700.3
1	GO:0009593	BP	detection of chemical stimulus	1/380	3/27940	0.0402507	1	gene_Solyc01g098420.3	Solyc01g098420.3
1	GO:0006253	BP	dCTP catabolic process	1/380	3/27940	0.0402507	1	gene_Solyc06g083130.5	Solyc06g083130.5
1	GO:0051865	BP	protein autoubiquitination	1/380	3/27940	0.0402507	1	gene_Solyc05g007895.1	Solyc05g007895.1
1	GO:1900376	BP	regulation of secondary metabolite biosynthetic process	1/380	3/27940	0.0402507	1	gene_Solyc05g052950.5	Solyc05g052950.5
1	GO:0046065	BP	dCTP metabolic process	1/380	3/27940	0.0402507	1	gene_Solyc06g083130.5	Solyc06g083130.5
1	GO:0010133	BP	proline catabolic process to glutamate	1/380	3/27940	0.0402507	1	gene_Solyc02g089630.3	Solyc02g089630.3
1	GO:0110102	BP	ribulose bisphosphate carboxylase complex assembly	1/380	3/27940	0.0402507	1	gene_Solyc02g081060.4	Solyc02g081060.4
1	GO:0006562	BP	proline catabolic process	1/380	3/27940	0.0402507	1	gene_Solyc02g089630.3	Solyc02g089630.3
1	GO:0051554	BP	flavonol metabolic process	1/380	3/27940	0.0402507	1	gene_Solyc03g080180.5	Solyc03g080180.5
1	GO:0051555	BP	flavonol biosynthetic process	1/380	3/27940	0.0402507	1	gene_Solyc03g080180.5	Solyc03g080180.5
1	GO:0051552	BP	flavone metabolic process	1/380	3/27940	0.0402507	1	gene_Solyc03g080180.5	Solyc03g080180.5
1	GO:0051553	BP	flavone biosynthetic process	1/380	3/27940	0.0402507	1	gene_Solyc03g080180.5	Solyc03g080180.5
3	GO:0016101	BP	diterpenoid metabolic process	3/380	56/27940	0.0407468	1	gene_Solyc10g007570.4;gene_Solyc02g070430.4;gene_Solyc03g006550.4	Solyc10g007570.4;Solyc02g070430.4;Solyc03g006550.4
6	GO:0006720	BP	isoprenoid metabolic process	6/380	185/27940	0.0414006	1	gene_Solyc08g075490.5;gene_Solyc10g085140.2;gene_Solyc01g105920.3;gene_Solyc10g007570.4;gene_Solyc02g070430.4;gene_Solyc03g006550.4	Solyc08g075490.5;Solyc10g085140.2;Solyc01g105920.3;Solyc10g007570.4;Solyc02g070430.4;Solyc03g006550.4
4	GO:0044242	BP	cellular lipid catabolic process	4/380	97/27940	0.0435668	1	gene_Solyc10g007570.4;gene_Solyc02g070430.4;gene_Solyc07g019670.4;gene_Solyc08g075490.5	Solyc10g007570.4;Solyc02g070430.4;Solyc07g019670.4;Solyc08g075490.5
9	GO:0006817	BP	phosphate ion transport	9/380	319/27940	0.0437473	1	gene_Solyc10g024490.2;gene_Solyc11g008200.2;gene_Solyc05g051400.5;gene_Solyc09g090070.1;gene_Solyc02g063020.4;gene_Solyc01g080870.3;gene_Solyc07g008200.3;gene_Solyc05g013180.4;gene_Solyc03g093410.3	Solyc10g024490.2;Solyc11g008200.2;Solyc05g051400.5;Solyc09g090070.1;Solyc02g063020.4;Solyc01g080870.3;Solyc07g008200.3;Solyc05g013180.4;Solyc03g093410.3
4	GO:0006749	BP	glutathione metabolic process	4/380	98/27940	0.0449534	1	gene_Solyc09g011630.3;gene_Solyc05g006730.5;gene_Solyc08g006150.3;gene_Solyc05g006750.3	Solyc09g011630.3;Solyc05g006730.5;Solyc08g006150.3;Solyc05g006750.3
2	GO:0006596	BP	polyamine biosynthetic process	2/380	25/27940	0.0450532	1	gene_Solyc01g091170.3;gene_Solyc03g007240.3	Solyc01g091170.3;Solyc03g007240.3
2	GO:0045927	BP	positive regulation of growth	2/380	25/27940	0.0450532	1	gene_Solyc07g042490.1;gene_Solyc10g084880.4	Solyc07g042490.1;Solyc10g084880.4
2	GO:0006558	BP	L-phenylalanine metabolic process	2/380	26/27940	0.0483789	1	gene_Solyc10g011925.2;gene_Solyc09g007900.5	Solyc10g011925.2;Solyc09g007900.5
2	GO:1902221	BP	erythrose 4-phosphate/phosphoenolpyruvate family amino acid metabolic process	2/380	26/27940	0.0483789	1	gene_Solyc10g011925.2;gene_Solyc09g007900.5	Solyc10g011925.2;Solyc09g007900.5
4	GO:0005887	CC	integral component of plasma membrane	4/380	99/27940	0.0463644	1	gene_Solyc09g082890.3;gene_Solyc03g033460.3;gene_Solyc04g054730.3;gene_Solyc04g072760.3	Solyc09g082890.3;Solyc03g033460.3;Solyc04g054730.3;Solyc04g072760.3
30	GO:0004672	MF	protein kinase activity	30/380	1482/27940	0.0281935	1	gene_Solyc06g071810.1;gene_Solyc05g025820.5;gene_Solyc10g084860.1;gene_Solyc02g086960.2;gene_Solyc06g007440.4;gene_Solyc02g031900.3;gene_Solyc07g056400.1;gene_Solyc03g115610.3;gene_Solyc05g009010.1;gene_Solyc03g083470.3;gene_Solyc09g015830.3;gene_Solyc08g066350.2;gene_Solyc01g098420.3;gene_Solyc05g009090.3;gene_Solyc06g005170.3;gene_Solyc06g006010.4;gene_Solyc09g011330.3;gene_Solyc02g081480.4;gen…	Solyc06g071810.1;Solyc05g025820.5;Solyc10g084860.1;Solyc02g086960.2;Solyc06g007440.4;Solyc02g031900.3;Solyc07g056400.1;Solyc03g115610.3;Solyc05g009010.1;Solyc03g083470.3;Solyc09g015830.3;Solyc08g066350.2;Solyc01g098420.3;Solyc05g009090.3;Solyc06g005170.3;Solyc06g006010.4;Solyc09g011330.3;Solyc02g081480.4;Solyc02g079600.3;Solyc05g047600.5;Solyc05g050490.4;Solyc09g075910.1;Solyc01g111880.4;Solyc02g…
2	GO:0035673	MF	oligopeptide transmembrane transporter activity	2/380	21/27940	0.0326736	1	gene_Solyc02g087410.4;gene_Solyc03g033460.3	Solyc02g087410.4;Solyc03g033460.3
2	GO:0016841	MF	ammonia-lyase activity	2/380	21/27940	0.0326736	1	gene_Solyc10g011925.2;gene_Solyc09g007900.5	Solyc10g011925.2;Solyc09g007900.5
2	GO:1904680	MF	peptide transmembrane transporter activity	2/380	21/27940	0.0326736	1	gene_Solyc02g087410.4;gene_Solyc03g033460.3	Solyc02g087410.4;Solyc03g033460.3
5	GO:0016830	MF	carbon-carbon lyase activity	5/380	136/27940	0.0385829	1	gene_Solyc04g009960.3;gene_Solyc08g068680.4;gene_Solyc02g085933.1;gene_Solyc08g068610.3;gene_Solyc08g068600.3	Solyc04g009960.3;Solyc08g068680.4;Solyc02g085933.1;Solyc08g068610.3;Solyc08g068600.3
1	GO:0052862	MF	glucan endo-1,4-beta-glucanase activity, C-3 substituted reducing group	1/380	3/27940	0.0402507	1	gene_Solyc02g089720.3	Solyc02g089720.3
1	GO:0052861	MF	glucan endo-1,3-beta-glucanase activity, C-3 substituted reducing group	1/380	3/27940	0.0402507	1	gene_Solyc02g089720.3	Solyc02g089720.3
1	GO:0016206	MF	catechol O-methyltransferase activity	1/380	3/27940	0.0402507	1	gene_Solyc03g080180.5	Solyc03g080180.5
1	GO:0047840	MF	dCTP diphosphatase activity	1/380	3/27940	0.0402507	1	gene_Solyc06g083130.5	Solyc06g083130.5
1	GO:0003839	MF	gamma-glutamylcyclotransferase activity	1/380	3/27940	0.0402507	1	gene_Solyc08g006150.3	Solyc08g006150.3
1	GO:0000703	MF	oxidized pyrimidine nucleobase lesion DNA N-glycosylase activity	1/380	3/27940	0.0402507	1	gene_Solyc09g083007.1	Solyc09g083007.1
1	GO:0102084	MF	L-dopa O-methyltransferase activity	1/380	3/27940	0.0402507	1	gene_Solyc03g080180.5	Solyc03g080180.5
1	GO:0052736	MF	beta-glucanase activity	1/380	3/27940	0.0402507	1	gene_Solyc02g089720.3	Solyc02g089720.3
1	GO:0070492	MF	oligosaccharide binding	1/380	3/27940	0.0402507	1	gene_Solyc07g053810.3	Solyc07g053810.3
1	GO:0102938	MF	orcinol O-methyltransferase activity	1/380	3/27940	0.0402507	1	gene_Solyc03g080180.5	Solyc03g080180.5
3	GO:0046943	MF	carboxylic acid transmembrane transporter activity	3/380	56/27940	0.0407468	1	gene_Solyc05g051400.5;gene_Solyc02g093700.3;gene_Solyc10g051120.3	Solyc05g051400.5;Solyc02g093700.3;Solyc10g051120.3
3	GO:0005342	MF	organic acid transmembrane transporter activity	3/380	56/27940	0.0407468	1	gene_Solyc05g051400.5;gene_Solyc02g093700.3;gene_Solyc10g051120.3	Solyc05g051400.5;Solyc02g093700.3;Solyc10g051120.3

## Sheet: 381 DEGs
Supplementary Dataset 2b. GO terms were significantly enriched in leaves of Cd- and Pb- stressed tomato seedlings
Number	GO ID	Term Type	Description	Ratio_in_study	Ratio_in_pop	Pvalue	Padjust	Gene_ids	Gene_names
8	GO:0004867	MF	serine-type endopeptidase inhibitor activity	8/330	48/27940	8.70502e-08	0.000232045	gene_Solyc09g084480.3;gene_Solyc09g084470.3;gene_Solyc03g098790.3;gene_Solyc11g021060.2;gene_Solyc03g098780.2;gene_Solyc09g083435.1;gene_Solyc03g020040.3;gene_Solyc09g084460.3	Solyc09g084480.3;Solyc09g084470.3;Solyc03g098790.3;Solyc11g021060.2;Solyc03g098780.2;Solyc09g083435.1;Solyc03g020040.3;Solyc09g084460.3
13	GO:0030414	MF	peptidase inhibitor activity	13/330	90/27940	1.14366e-07	0.000232045	gene_Solyc09g084480.3;gene_Solyc09g084470.3;gene_Solyc03g098790.3;gene_Solyc03g098700.1;gene_Solyc11g021060.2;gene_Solyc11g022590.1;gene_Solyc07g007240.3;gene_Solyc09g083435.1;gene_Solyc03g098720.3;gene_Solyc03g020040.3;gene_Solyc09g084460.3;gene_Solyc03g098780.2;gene_Solyc04g014800.3	Solyc09g084480.3;Solyc09g084470.3;Solyc03g098790.3;Solyc03g098700.1;Solyc11g021060.2;Solyc11g022590.1;Solyc07g007240.3;Solyc09g083435.1;Solyc03g098720.3;Solyc03g020040.3;Solyc09g084460.3;Solyc03g098780.2;Solyc04g014800.3
13	GO:0004866	MF	endopeptidase inhibitor activity	13/330	90/27940	1.14366e-07	0.000232045	gene_Solyc09g084480.3;gene_Solyc09g084470.3;gene_Solyc03g098790.3;gene_Solyc03g098700.1;gene_Solyc11g021060.2;gene_Solyc11g022590.1;gene_Solyc07g007240.3;gene_Solyc09g083435.1;gene_Solyc03g098720.3;gene_Solyc03g020040.3;gene_Solyc09g084460.3;gene_Solyc03g098780.2;gene_Solyc04g014800.3	Solyc09g084480.3;Solyc09g084470.3;Solyc03g098790.3;Solyc03g098700.1;Solyc11g021060.2;Solyc11g022590.1;Solyc07g007240.3;Solyc09g083435.1;Solyc03g098720.3;Solyc03g020040.3;Solyc09g084460.3;Solyc03g098780.2;Solyc04g014800.3
13	GO:0061135	MF	endopeptidase regulator activity	13/330	91/27940	1.27153e-07	0.000232045	gene_Solyc09g084480.3;gene_Solyc09g084470.3;gene_Solyc03g098790.3;gene_Solyc03g098700.1;gene_Solyc11g021060.2;gene_Solyc11g022590.1;gene_Solyc07g007240.3;gene_Solyc09g083435.1;gene_Solyc03g098720.3;gene_Solyc03g020040.3;gene_Solyc09g084460.3;gene_Solyc03g098780.2;gene_Solyc04g014800.3	Solyc09g084480.3;Solyc09g084470.3;Solyc03g098790.3;Solyc03g098700.1;Solyc11g021060.2;Solyc11g022590.1;Solyc07g007240.3;Solyc09g083435.1;Solyc03g098720.3;Solyc03g020040.3;Solyc09g084460.3;Solyc03g098780.2;Solyc04g014800.3
13	GO:0061134	MF	peptidase regulator activity	13/330	92/27940	1.41181e-07	0.000232045	gene_Solyc09g084480.3;gene_Solyc09g084470.3;gene_Solyc03g098790.3;gene_Solyc03g098700.1;gene_Solyc11g021060.2;gene_Solyc11g022590.1;gene_Solyc07g007240.3;gene_Solyc09g083435.1;gene_Solyc03g098720.3;gene_Solyc03g020040.3;gene_Solyc09g084460.3;gene_Solyc03g098780.2;gene_Solyc04g014800.3	Solyc09g084480.3;Solyc09g084470.3;Solyc03g098790.3;Solyc03g098700.1;Solyc11g021060.2;Solyc11g022590.1;Solyc07g007240.3;Solyc09g083435.1;Solyc03g098720.3;Solyc03g020040.3;Solyc09g084460.3;Solyc03g098780.2;Solyc04g014800.3
7	GO:0005337	MF	nucleoside transmembrane transporter activity	7/330	38/27940	2.773e-07	0.000379808	gene_Solyc04g074880.2;gene_Solyc07g008440.3;gene_Solyc02g079330.3;gene_Solyc02g079350.3;gene_Solyc02g071090.3;gene_Solyc02g071100.3;gene_Solyc08g077370.4	Solyc04g074880.2;Solyc07g008440.3;Solyc02g079330.3;Solyc02g079350.3;Solyc02g071090.3;Solyc02g071100.3;Solyc08g077370.4
13	GO:0015631	MF	tubulin binding	13/330	188/27940	4.15845e-07	0.000488202	gene_Solyc01g057320.3;gene_Solyc02g066980.1;gene_Solyc10g083310.2;gene_Solyc03g025470.5;gene_Solyc05g050900.4;gene_Solyc10g086340.1;gene_Solyc04g076310.4;gene_Solyc02g092950.3;gene_Solyc09g010810.3;gene_Solyc08g077360.3;gene_Solyc04g077540.4;gene_Solyc01g080750.3;gene_Solyc12g098630.2	Solyc01g057320.3;Solyc02g066980.1;Solyc10g083310.2;Solyc03g025470.5;Solyc05g050900.4;Solyc10g086340.1;Solyc04g076310.4;Solyc02g092950.3;Solyc09g010810.3;Solyc08g077360.3;Solyc04g077540.4;Solyc01g080750.3;Solyc12g098630.2
50	GO:0005886	CC	plasma membrane	50/330	1865/27940	1.03177e-06	0.00102598	gene_Solyc07g008620.1;gene_Solyc12g006840.2;gene_Solyc07g009443.1;gene_Solyc08g066320.4;gene_Solyc11g006710.2;gene_Solyc03g120110.3;gene_Solyc06g048740.4;gene_Solyc03g005420.2;gene_Solyc01g006950.3;gene_Solyc10g007070.4;gene_Solyc02g079330.3;gene_Solyc02g070280.3;gene_Solyc04g074030.3;gene_Solyc07g043070.3;gene_Solyc02g150128.1;gene_Solyc02g080040.4;gene_Solyc01g009700.3;gene_Solyc04g079560.3;gen…	Solyc07g008620.1;Solyc12g006840.2;Solyc07g009443.1;Solyc08g066320.4;Solyc11g006710.2;Solyc03g120110.3;Solyc06g048740.4;Solyc03g005420.2;Solyc01g006950.3;Solyc10g007070.4;Solyc02g079330.3;Solyc02g070280.3;Solyc04g074030.3;Solyc07g043070.3;Solyc02g150128.1;Solyc02g080040.4;Solyc01g009700.3;Solyc04g079560.3;Solyc02g072470.4;Solyc01g005040.3;Solyc02g079350.3;Solyc03g097600.4;Solyc09g011990.1;Solyc04g…
13	GO:0008017	MF	microtubule binding	13/330	173/27940	1.12361e-06	0.00102598	gene_Solyc01g057320.3;gene_Solyc02g066980.1;gene_Solyc10g083310.2;gene_Solyc03g025470.5;gene_Solyc05g050900.4;gene_Solyc10g086340.1;gene_Solyc04g076310.4;gene_Solyc02g092950.3;gene_Solyc09g010810.3;gene_Solyc08g077360.3;gene_Solyc04g077540.4;gene_Solyc01g080750.3;gene_Solyc12g098630.2	Solyc01g057320.3;Solyc02g066980.1;Solyc10g083310.2;Solyc03g025470.5;Solyc05g050900.4;Solyc10g086340.1;Solyc04g076310.4;Solyc02g092950.3;Solyc09g010810.3;Solyc08g077360.3;Solyc04g077540.4;Solyc01g080750.3;Solyc12g098630.2
8	GO:0007018	BP	microtubule-based movement	8/330	75/27940	2.95161e-06	0.00220512	gene_Solyc01g057320.3;gene_Solyc10g083310.2;gene_Solyc03g025470.5;gene_Solyc10g086340.1;gene_Solyc04g076310.4;gene_Solyc09g010810.3;gene_Solyc04g077540.4;gene_Solyc12g098630.2	Solyc01g057320.3;Solyc10g083310.2;Solyc03g025470.5;Solyc10g086340.1;Solyc04g076310.4;Solyc09g010810.3;Solyc04g077540.4;Solyc12g098630.2
8	GO:0003777	MF	microtubule motor activity	8/330	75/27940	2.95161e-06	0.00220512	gene_Solyc01g057320.3;gene_Solyc10g083310.2;gene_Solyc03g025470.5;gene_Solyc10g086340.1;gene_Solyc04g076310.4;gene_Solyc09g010810.3;gene_Solyc04g077540.4;gene_Solyc12g098630.2	Solyc01g057320.3;Solyc10g083310.2;Solyc03g025470.5;Solyc10g086340.1;Solyc04g076310.4;Solyc09g010810.3;Solyc04g077540.4;Solyc12g098630.2
13	GO:0007017	BP	microtubule-based process	13/330	234/27940	4.79897e-06	0.00284859	gene_Solyc01g057320.3;gene_Solyc02g066980.1;gene_Solyc12g095870.3;gene_Solyc10g083310.2;gene_Solyc03g025470.5;gene_Solyc10g086340.1;gene_Solyc04g076310.4;gene_Solyc02g092950.3;gene_Solyc09g010810.3;gene_Solyc04g077540.4;gene_Solyc12g098630.2;gene_Solyc01g080750.3;gene_Solyc03g112590.4	Solyc01g057320.3;Solyc02g066980.1;Solyc12g095870.3;Solyc10g083310.2;Solyc03g025470.5;Solyc10g086340.1;Solyc04g076310.4;Solyc02g092950.3;Solyc09g010810.3;Solyc04g077540.4;Solyc12g098630.2;Solyc01g080750.3;Solyc03g112590.4
14	GO:0004857	MF	enzyme inhibitor activity	14/330	271/27940	4.81796e-06	0.00284859	gene_Solyc02g080200.5;gene_Solyc11g021060.2;gene_Solyc09g084480.3;gene_Solyc09g084470.3;gene_Solyc07g007240.3;gene_Solyc03g098700.1;gene_Solyc03g098790.3;gene_Solyc11g022590.1;gene_Solyc09g083435.1;gene_Solyc09g084460.3;gene_Solyc03g020040.3;gene_Solyc03g098780.2;gene_Solyc03g098720.3;gene_Solyc04g014800.3	Solyc02g080200.5;Solyc11g021060.2;Solyc09g084480.3;Solyc09g084470.3;Solyc07g007240.3;Solyc03g098700.1;Solyc03g098790.3;Solyc11g022590.1;Solyc09g083435.1;Solyc09g084460.3;Solyc03g020040.3;Solyc03g098780.2;Solyc03g098720.3;Solyc04g014800.3
15	GO:0008092	MF	cytoskeletal protein binding	15/330	317/27940	6.4206e-06	0.00329778	gene_Solyc01g057320.3;gene_Solyc02g066980.1;gene_Solyc03g095600.1;gene_Solyc10g083310.2;gene_Solyc03g096890.3;gene_Solyc03g025470.5;gene_Solyc05g050900.4;gene_Solyc10g086340.1;gene_Solyc04g076310.4;gene_Solyc02g092950.3;gene_Solyc09g010810.3;gene_Solyc08g077360.3;gene_Solyc04g077540.4;gene_Solyc01g080750.3;gene_Solyc12g098630.2	Solyc01g057320.3;Solyc02g066980.1;Solyc03g095600.1;Solyc10g083310.2;Solyc03g096890.3;Solyc03g025470.5;Solyc05g050900.4;Solyc10g086340.1;Solyc04g076310.4;Solyc02g092950.3;Solyc09g010810.3;Solyc08g077360.3;Solyc04g077540.4;Solyc01g080750.3;Solyc12g098630.2
8	GO:1901505	MF	carbohydrate derivative transmembrane transporter activity	8/330	95/27940	1.73358e-05	0.00791344	gene_Solyc04g074880.2;gene_Solyc07g008440.3;gene_Solyc01g087070.4;gene_Solyc02g079330.3;gene_Solyc02g079350.3;gene_Solyc02g071090.3;gene_Solyc02g071100.3;gene_Solyc08g077370.4	Solyc04g074880.2;Solyc07g008440.3;Solyc01g087070.4;Solyc02g079330.3;Solyc02g079350.3;Solyc02g071090.3;Solyc02g071100.3;Solyc08g077370.4
8	GO:0015932	MF	nucleobase-containing compound transmembrane transporter activity	8/330	96/27940	1.87198e-05	0.00791344	gene_Solyc04g074880.2;gene_Solyc07g008440.3;gene_Solyc01g087070.4;gene_Solyc02g079330.3;gene_Solyc02g079350.3;gene_Solyc02g071090.3;gene_Solyc02g071100.3;gene_Solyc08g077370.4	Solyc04g074880.2;Solyc07g008440.3;Solyc01g087070.4;Solyc02g079330.3;Solyc02g079350.3;Solyc02g071090.3;Solyc02g071100.3;Solyc08g077370.4
11	GO:0005874	CC	microtubule	11/330	196/27940	2.34727e-05	0.00918564	gene_Solyc01g057320.3;gene_Solyc02g066980.1;gene_Solyc03g025470.5;gene_Solyc05g050900.4;gene_Solyc02g092950.3;gene_Solyc05g014270.4;gene_Solyc09g010810.3;gene_Solyc04g077540.4;gene_Solyc12g095870.3;gene_Solyc01g080750.3;gene_Solyc12g098630.2	Solyc01g057320.3;Solyc02g066980.1;Solyc03g025470.5;Solyc05g050900.4;Solyc02g092950.3;Solyc05g014270.4;Solyc09g010810.3;Solyc04g077540.4;Solyc12g095870.3;Solyc01g080750.3;Solyc12g098630.2
8	GO:0003774	MF	cytoskeletal motor activity	8/330	101/27940	2.71121e-05	0.0101276	gene_Solyc01g057320.3;gene_Solyc10g083310.2;gene_Solyc03g025470.5;gene_Solyc10g086340.1;gene_Solyc04g076310.4;gene_Solyc09g010810.3;gene_Solyc04g077540.4;gene_Solyc12g098630.2	Solyc01g057320.3;Solyc10g083310.2;Solyc03g025470.5;Solyc10g086340.1;Solyc04g076310.4;Solyc09g010810.3;Solyc04g077540.4;Solyc12g098630.2
5	GO:0015211	MF	purine nucleoside transmembrane transporter activity	5/330	31/27940	2.94399e-05	0.010519	gene_Solyc02g071100.3;gene_Solyc04g074880.2;gene_Solyc07g008440.3;gene_Solyc08g077370.4;gene_Solyc02g071090.3	Solyc02g071100.3;Solyc04g074880.2;Solyc07g008440.3;Solyc08g077370.4;Solyc02g071090.3
11	GO:0099512	CC	supramolecular fiber	11/330	204/27940	3.39179e-05	0.0107207	gene_Solyc01g057320.3;gene_Solyc02g066980.1;gene_Solyc03g025470.5;gene_Solyc05g050900.4;gene_Solyc02g092950.3;gene_Solyc05g014270.4;gene_Solyc09g010810.3;gene_Solyc04g077540.4;gene_Solyc12g095870.3;gene_Solyc01g080750.3;gene_Solyc12g098630.2	Solyc01g057320.3;Solyc02g066980.1;Solyc03g025470.5;Solyc05g050900.4;Solyc02g092950.3;Solyc05g014270.4;Solyc09g010810.3;Solyc04g077540.4;Solyc12g095870.3;Solyc01g080750.3;Solyc12g098630.2
11	GO:0099513	CC	polymeric cytoskeletal fiber	11/330	204/27940	3.39179e-05	0.0107207	gene_Solyc01g057320.3;gene_Solyc02g066980.1;gene_Solyc03g025470.5;gene_Solyc05g050900.4;gene_Solyc02g092950.3;gene_Solyc05g014270.4;gene_Solyc09g010810.3;gene_Solyc04g077540.4;gene_Solyc12g095870.3;gene_Solyc01g080750.3;gene_Solyc12g098630.2	Solyc01g057320.3;Solyc02g066980.1;Solyc03g025470.5;Solyc05g050900.4;Solyc02g092950.3;Solyc05g014270.4;Solyc09g010810.3;Solyc04g077540.4;Solyc12g095870.3;Solyc01g080750.3;Solyc12g098630.2
11	GO:0099081	CC	supramolecular polymer	11/330	204/27940	3.39179e-05	0.0107207	gene_Solyc01g057320.3;gene_Solyc02g066980.1;gene_Solyc03g025470.5;gene_Solyc05g050900.4;gene_Solyc02g092950.3;gene_Solyc05g014270.4;gene_Solyc09g010810.3;gene_Solyc04g077540.4;gene_Solyc12g095870.3;gene_Solyc01g080750.3;gene_Solyc12g098630.2	Solyc01g057320.3;Solyc02g066980.1;Solyc03g025470.5;Solyc05g050900.4;Solyc02g092950.3;Solyc05g014270.4;Solyc09g010810.3;Solyc04g077540.4;Solyc12g095870.3;Solyc01g080750.3;Solyc12g098630.2
44	GO:0016301	MF	kinase activity	44/330	1973/27940	4.96491e-05	0.014572	gene_Solyc07g008620.1;gene_Solyc12g006840.2;gene_Solyc07g009443.1;gene_Solyc08g066320.4;gene_Solyc03g096890.3;gene_Solyc11g005630.1;gene_Solyc06g048740.4;gene_Solyc03g120110.3;gene_Solyc06g019170.3;gene_Solyc05g008980.2;gene_Solyc07g045160.3;gene_Solyc05g043390.2;gene_Solyc03g078360.1;gene_Solyc04g074030.3;gene_Solyc01g106500.4;gene_Solyc11g065220.2;gene_Solyc04g077310.4;gene_Solyc09g011270.5;gen…	Solyc07g008620.1;Solyc12g006840.2;Solyc07g009443.1;Solyc08g066320.4;Solyc03g096890.3;Solyc11g005630.1;Solyc06g048740.4;Solyc03g120110.3;Solyc06g019170.3;Solyc05g008980.2;Solyc07g045160.3;Solyc05g043390.2;Solyc03g078360.1;Solyc04g074030.3;Solyc01g106500.4;Solyc11g065220.2;Solyc04g077310.4;Solyc09g011270.5;Solyc01g008500.4;Solyc07g055180.3;Solyc02g080040.4;Solyc02g072470.4;Solyc09g065570.5;Solyc11g…
36	GO:0004672	MF	protein kinase activity	36/330	1482/27940	5.38268e-05	0.0152534	gene_Solyc12g006840.2;gene_Solyc07g009443.1;gene_Solyc08g066320.4;gene_Solyc03g096890.3;gene_Solyc11g005630.1;gene_Solyc06g048740.4;gene_Solyc03g120110.3;gene_Solyc05g008980.2;gene_Solyc05g043390.2;gene_Solyc03g078360.1;gene_Solyc04g074030.3;gene_Solyc01g106500.4;gene_Solyc04g077310.4;gene_Solyc01g008500.4;gene_Solyc07g055180.3;gene_Solyc02g080040.4;gene_Solyc02g072470.4;gene_Solyc09g065570.5;gen…	Solyc12g006840.2;Solyc07g009443.1;Solyc08g066320.4;Solyc03g096890.3;Solyc11g005630.1;Solyc06g048740.4;Solyc03g120110.3;Solyc05g008980.2;Solyc05g043390.2;Solyc03g078360.1;Solyc04g074030.3;Solyc01g106500.4;Solyc04g077310.4;Solyc01g008500.4;Solyc07g055180.3;Solyc02g080040.4;Solyc02g072470.4;Solyc09g065570.5;Solyc11g069640.2;Solyc09g011990.1;Solyc02g080010.3;Solyc11g017270.2;Solyc01g067020.4;Solyc12g…
4	GO:0008574	MF	plus-end-directed microtubule motor activity	4/330	19/27940	6.43811e-05	0.0176361	gene_Solyc01g057320.3;gene_Solyc10g086340.1;gene_Solyc10g083310.2;gene_Solyc12g098630.2	Solyc01g057320.3;Solyc10g086340.1;Solyc10g083310.2;Solyc12g098630.2
38	GO:0016773	MF	phosphotransferase activity, alcohol group as acceptor	38/330	1645/27940	8.04216e-05	0.0213195	gene_Solyc12g006840.2;gene_Solyc07g009443.1;gene_Solyc08g066320.4;gene_Solyc03g096890.3;gene_Solyc11g005630.1;gene_Solyc06g048740.4;gene_Solyc03g120110.3;gene_Solyc05g008980.2;gene_Solyc07g045160.3;gene_Solyc05g043390.2;gene_Solyc03g078360.1;gene_Solyc04g074030.3;gene_Solyc01g106500.4;gene_Solyc11g065220.2;gene_Solyc04g077310.4;gene_Solyc01g008500.4;gene_Solyc07g055180.3;gene_Solyc02g080040.4;gen…	Solyc12g006840.2;Solyc07g009443.1;Solyc08g066320.4;Solyc03g096890.3;Solyc11g005630.1;Solyc06g048740.4;Solyc03g120110.3;Solyc05g008980.2;Solyc07g045160.3;Solyc05g043390.2;Solyc03g078360.1;Solyc04g074030.3;Solyc01g106500.4;Solyc11g065220.2;Solyc04g077310.4;Solyc01g008500.4;Solyc07g055180.3;Solyc02g080040.4;Solyc02g072470.4;Solyc09g065570.5;Solyc11g069640.2;Solyc09g011990.1;Solyc02g080010.3;Solyc11g…
13	GO:0005773	CC	vacuole	13/330	316/27940	0.000110141	0.0282855	gene_Solyc03g019890.3;gene_Solyc03g098790.3;gene_Solyc03g098700.1;gene_Solyc06g068880.3;gene_Solyc02g069110.5;gene_Solyc08g080620.1;gene_Solyc03g114530.5;gene_Solyc07g041920.5;gene_Solyc03g098780.2;gene_Solyc04g079210.3;gene_Solyc08g065610.3;gene_Solyc02g077040.4;gene_Solyc12g039070.2	Solyc03g019890.3;Solyc03g098790.3;Solyc03g098700.1;Solyc06g068880.3;Solyc02g069110.5;Solyc08g080620.1;Solyc03g114530.5;Solyc07g041920.5;Solyc03g098780.2;Solyc04g079210.3;Solyc08g065610.3;Solyc02g077040.4;Solyc12g039070.2
2	GO:0019828	MF	aspartic-type endopeptidase inhibitor activity	2/330	2/27940	0.000139083	0.0328736	gene_Solyc03g098780.2;gene_Solyc03g098790.3	Solyc03g098780.2;Solyc03g098790.3
18	GO:0030234	MF	enzyme regulator activity	18/330	561/27940	0.000140007	0.0328736	gene_Solyc02g080200.5;gene_Solyc02g066980.1;gene_Solyc09g084480.3;gene_Solyc09g084470.3;gene_Solyc11g022590.1;gene_Solyc03g098700.1;gene_Solyc11g021060.2;gene_Solyc06g065680.3;gene_Solyc03g098780.2;gene_Solyc07g007240.3;gene_Solyc09g083435.1;gene_Solyc04g014800.3;gene_Solyc07g043320.3;gene_Solyc03g020040.3;gene_Solyc09g084460.3;gene_Solyc06g043150.4;gene_Solyc03g098720.3;gene_Solyc03g098790.3	Solyc02g080200.5;Solyc02g066980.1;Solyc09g084480.3;Solyc09g084470.3;Solyc11g022590.1;Solyc03g098700.1;Solyc11g021060.2;Solyc06g065680.3;Solyc03g098780.2;Solyc07g007240.3;Solyc09g083435.1;Solyc04g014800.3;Solyc07g043320.3;Solyc03g020040.3;Solyc09g084460.3;Solyc06g043150.4;Solyc03g098720.3;Solyc03g098790.3
4	GO:0007052	BP	mitotic spindle organization	4/330	27/27940	0.000270576	0.0585155	gene_Solyc02g066980.1;gene_Solyc12g095870.3;gene_Solyc04g076310.4;gene_Solyc03g112590.4	Solyc02g066980.1;Solyc12g095870.3;Solyc04g076310.4;Solyc03g112590.4
4	GO:1902850	BP	microtubule cytoskeleton organization involved in mitosis	4/330	27/27940	0.000270576	0.0585155	gene_Solyc02g066980.1;gene_Solyc12g095870.3;gene_Solyc04g076310.4;gene_Solyc03g112590.4	Solyc02g066980.1;Solyc12g095870.3;Solyc04g076310.4;Solyc03g112590.4
64	GO:0140096	MF	catalytic activity, acting on a protein	64/330	3471/27940	0.000279987	0.0589983	gene_Solyc12g006840.2;gene_Solyc07g009443.1;gene_Solyc08g066320.4;gene_Solyc03g096890.3;gene_Solyc01g007030.3;gene_Solyc08g079870.3;gene_Solyc11g005630.1;gene_Solyc02g069110.5;gene_Solyc06g048740.4;gene_Solyc04g056340.4;gene_Solyc12g042793.1;gene_Solyc05g008980.2;gene_Solyc06g068550.5;gene_Solyc02g077040.4;gene_Solyc05g043390.2;gene_Solyc03g078360.1;gene_Solyc04g074030.3;gene_Solyc02g076980.5.1;g…	Solyc12g006840.2;Solyc07g009443.1;Solyc08g066320.4;Solyc03g096890.3;Solyc01g007030.3;Solyc08g079870.3;Solyc11g005630.1;Solyc02g069110.5;Solyc06g048740.4;Solyc04g056340.4;Solyc12g042793.1;Solyc05g008980.2;Solyc06g068550.5;Solyc02g077040.4;Solyc05g043390.2;Solyc03g078360.1;Solyc04g074030.3;Solyc02g076980.5.1;Solyc02g081970.4;Solyc01g106500.4;Solyc04g077310.4;Solyc08g077940.2;Solyc01g008500.4;Solyc0…
11	GO:0000160	BP	phosphorelay signal transduction system	11/330	260/27940	0.000289991	0.0595787	gene_Solyc04g077490.3;gene_Solyc08g082210.4;gene_Solyc05g050340.4;gene_Solyc03g081270.2;gene_Solyc10g050970.1;gene_Solyc08g081960.3;gene_Solyc06g082590.1;gene_Solyc02g077370.1;gene_Solyc01g098400.3;gene_Solyc08g066350.2;gene_Solyc08g008305.1	Solyc04g077490.3;Solyc08g082210.4;Solyc05g050340.4;Solyc03g081270.2;Solyc10g050970.1;Solyc08g081960.3;Solyc06g082590.1;Solyc02g077370.1;Solyc01g098400.3;Solyc08g066350.2;Solyc08g008305.1
18	GO:0030246	MF	carbohydrate binding	18/330	604/27940	0.000342177	0.0685856	gene_Solyc10g078600.3;gene_Solyc12g006840.2;gene_Solyc07g009443.1;gene_Solyc11g065220.2;gene_Solyc04g077310.4;gene_Solyc03g006780.2;gene_Solyc01g008500.4;gene_Solyc11g005630.1;gene_Solyc12g005940.2;gene_Solyc09g010020.2;gene_Solyc03g120110.3;gene_Solyc03g019890.3;gene_Solyc02g071470.5;gene_Solyc03g080190.3;gene_Solyc09g011990.1;gene_Solyc03g006880.3;gene_Solyc03g078360.1;gene_Solyc06g083910.3	Solyc10g078600.3;Solyc12g006840.2;Solyc07g009443.1;Solyc11g065220.2;Solyc04g077310.4;Solyc03g006780.2;Solyc01g008500.4;Solyc11g005630.1;Solyc12g005940.2;Solyc09g010020.2;Solyc03g120110.3;Solyc03g019890.3;Solyc02g071470.5;Solyc03g080190.3;Solyc09g011990.1;Solyc03g006880.3;Solyc03g078360.1;Solyc06g083910.3
18	GO:0098772	MF	molecular function regulator activity	18/330	612/27940	0.000399756	0.0782189	gene_Solyc02g080200.5;gene_Solyc02g066980.1;gene_Solyc09g084480.3;gene_Solyc09g084470.3;gene_Solyc11g022590.1;gene_Solyc03g098700.1;gene_Solyc11g021060.2;gene_Solyc06g065680.3;gene_Solyc03g098780.2;gene_Solyc07g007240.3;gene_Solyc09g083435.1;gene_Solyc04g014800.3;gene_Solyc07g043320.3;gene_Solyc03g020040.3;gene_Solyc09g084460.3;gene_Solyc06g043150.4;gene_Solyc03g098720.3;gene_Solyc03g098790.3	Solyc02g080200.5;Solyc02g066980.1;Solyc09g084480.3;Solyc09g084470.3;Solyc11g022590.1;Solyc03g098700.1;Solyc11g021060.2;Solyc06g065680.3;Solyc03g098780.2;Solyc07g007240.3;Solyc09g083435.1;Solyc04g014800.3;Solyc07g043320.3;Solyc03g020040.3;Solyc09g084460.3;Solyc06g043150.4;Solyc03g098720.3;Solyc03g098790.3
290	GO:0003674	MF	molecular_function	290/330	22526/27940	0.000566088	0.108189	gene_Solyc11g017270.2;gene_Solyc12g006840.2;gene_Solyc07g066330.3;gene_Solyc01g104770.4;gene_Solyc02g069110.5;gene_Solyc10g078370.2;gene_Solyc10g086340.1;gene_Solyc01g086800.4;gene_Solyc01g097280.3;gene_Solyc08g077360.3;gene_Solyc11g018772.1;gene_Solyc06g068550.5;gene_Solyc08g067610.3;gene_Solyc03g111790.4;gene_Solyc12g006860.2;gene_Solyc12g014010.2;gene_Solyc04g072070.4;gene_Solyc01g103960.3;gen…	Solyc11g017270.2;Solyc12g006840.2;Solyc07g066330.3;Solyc01g104770.4;Solyc02g069110.5;Solyc10g078370.2;Solyc10g086340.1;Solyc01g086800.4;Solyc01g097280.3;Solyc08g077360.3;Solyc11g018772.1;Solyc06g068550.5;Solyc08g067610.3;Solyc03g111790.4;Solyc12g006860.2;Solyc12g014010.2;Solyc04g072070.4;Solyc01g103960.3;Solyc01g106500.4;Solyc01g104110.5;Solyc05g007760.2;Solyc05g010420.2;Solyc09g075360.5;Solyc02g…
5	GO:0007051	BP	spindle organization	5/330	58/27940	0.000611942	0.114294	gene_Solyc02g092950.3;gene_Solyc02g066980.1;gene_Solyc12g095870.3;gene_Solyc04g076310.4;gene_Solyc03g112590.4	Solyc02g092950.3;Solyc02g066980.1;Solyc12g095870.3;Solyc04g076310.4;Solyc03g112590.4
15	GO:0009755	BP	hormone-mediated signaling pathway	15/330	489/27940	0.000786351	0.143605	gene_Solyc04g077490.3;gene_Solyc08g082210.4;gene_Solyc04g007800.5;gene_Solyc02g150128.1;gene_Solyc05g050340.4;gene_Solyc10g050970.1;gene_Solyc08g082630.3;gene_Solyc08g081960.3;gene_Solyc06g082590.1;gene_Solyc10g078370.2;gene_Solyc10g086380.1;gene_Solyc08g008305.1;gene_Solyc01g098400.3;gene_Solyc08g066350.2;gene_Solyc02g077370.1	Solyc04g077490.3;Solyc08g082210.4;Solyc04g007800.5;Solyc02g150128.1;Solyc05g050340.4;Solyc10g050970.1;Solyc08g082630.3;Solyc08g081960.3;Solyc06g082590.1;Solyc10g078370.2;Solyc10g086380.1;Solyc08g008305.1;Solyc01g098400.3;Solyc08g066350.2;Solyc02g077370.1
5	GO:0009611	BP	response to wounding	5/330	62/27940	0.000831644	0.148575	gene_Solyc09g084480.3;gene_Solyc09g083435.1;gene_Solyc07g032490.3;gene_Solyc09g084470.3;gene_Solyc09g084460.3	Solyc09g084480.3;Solyc09g083435.1;Solyc07g032490.3;Solyc09g084470.3;Solyc09g084460.3
29	GO:0016310	BP	phosphorylation	29/330	1289/27940	0.000864143	0.151096	gene_Solyc12g006840.2;gene_Solyc07g009443.1;gene_Solyc08g066320.4;gene_Solyc03g096890.3;gene_Solyc11g005630.1;gene_Solyc06g048740.4;gene_Solyc03g120110.3;gene_Solyc05g008980.2;gene_Solyc07g045160.3;gene_Solyc03g078360.1;gene_Solyc04g074030.3;gene_Solyc11g065220.2;gene_Solyc03g006780.2;gene_Solyc01g008500.4;gene_Solyc07g055180.3;gene_Solyc02g080040.4;gene_Solyc02g072470.4;gene_Solyc09g011990.1;gen…	Solyc12g006840.2;Solyc07g009443.1;Solyc08g066320.4;Solyc03g096890.3;Solyc11g005630.1;Solyc06g048740.4;Solyc03g120110.3;Solyc05g008980.2;Solyc07g045160.3;Solyc03g078360.1;Solyc04g074030.3;Solyc11g065220.2;Solyc03g006780.2;Solyc01g008500.4;Solyc07g055180.3;Solyc02g080040.4;Solyc02g072470.4;Solyc09g011990.1;Solyc11g017270.2;Solyc01g067020.4;Solyc02g080080.3;Solyc05g008960.3;Solyc01g098400.3;Solyc08g…
61	GO:0005524	MF	ATP binding	61/330	3404/27940	0.000897295	0.153624	gene_Solyc01g057320.3;gene_Solyc12g006840.2;gene_Solyc07g009443.1;gene_Solyc08g066320.4;gene_Solyc03g096890.3;gene_Solyc09g009200.3;gene_Solyc01g104770.4;gene_Solyc03g082430.1;gene_Solyc06g048740.4;gene_Solyc10g086340.1;gene_Solyc03g120110.3;gene_Solyc02g150128.1;gene_Solyc05g008980.2;gene_Solyc07g045160.3;gene_Solyc04g077540.4;gene_Solyc08g067610.3;gene_Solyc03g078360.1;gene_Solyc04g074030.3;gen…	Solyc01g057320.3;Solyc12g006840.2;Solyc07g009443.1;Solyc08g066320.4;Solyc03g096890.3;Solyc09g009200.3;Solyc01g104770.4;Solyc03g082430.1;Solyc06g048740.4;Solyc10g086340.1;Solyc03g120110.3;Solyc02g150128.1;Solyc05g008980.2;Solyc07g045160.3;Solyc04g077540.4;Solyc08g067610.3;Solyc03g078360.1;Solyc04g074030.3;Solyc01g103960.3;Solyc01g106500.4;Solyc09g091660.3;Solyc04g077310.4;Solyc09g082890.3;Solyc01g…
11	GO:0099080	CC	supramolecular complex	11/330	304/27940	0.00105934	0.177666	gene_Solyc01g057320.3;gene_Solyc02g066980.1;gene_Solyc03g025470.5;gene_Solyc05g050900.4;gene_Solyc02g092950.3;gene_Solyc05g014270.4;gene_Solyc09g010810.3;gene_Solyc04g077540.4;gene_Solyc12g095870.3;gene_Solyc01g080750.3;gene_Solyc12g098630.2	Solyc01g057320.3;Solyc02g066980.1;Solyc03g025470.5;Solyc05g050900.4;Solyc02g092950.3;Solyc05g014270.4;Solyc09g010810.3;Solyc04g077540.4;Solyc12g095870.3;Solyc01g080750.3;Solyc12g098630.2
2	GO:0051233	CC	spindle midzone	2/330	5/27940	0.00135845	0.218898	gene_Solyc02g092950.3;gene_Solyc12g095870.3	Solyc02g092950.3;Solyc12g095870.3
6	GO:0009308	BP	amine metabolic process	6/330	103/27940	0.0014203	0.221225	gene_Solyc09g007830.3;gene_Solyc05g010420.2;gene_Solyc04g082030.1;gene_Solyc03g007240.3;gene_Solyc09g075920.1;gene_Solyc01g162830.1	Solyc09g007830.3;Solyc05g010420.2;Solyc04g082030.1;Solyc03g007240.3;Solyc09g075920.1;Solyc01g162830.1
3	GO:0070507	BP	regulation of microtubule cytoskeleton organization	3/330	20/27940	0.00160344	0.236499	gene_Solyc02g092950.3;gene_Solyc02g066980.1;gene_Solyc05g050900.4	Solyc02g092950.3;Solyc02g066980.1;Solyc05g050900.4
4	GO:0042401	BP	cellular biogenic amine biosynthetic process	4/330	43/27940	0.00164035	0.236499	gene_Solyc05g010420.2;gene_Solyc01g162830.1;gene_Solyc04g082030.1;gene_Solyc03g007240.3	Solyc05g010420.2;Solyc01g162830.1;Solyc04g082030.1;Solyc03g007240.3
4	GO:0009309	BP	amine biosynthetic process	4/330	43/27940	0.00164035	0.236499	gene_Solyc05g010420.2;gene_Solyc01g162830.1;gene_Solyc04g082030.1;gene_Solyc03g007240.3	Solyc05g010420.2;Solyc01g162830.1;Solyc04g082030.1;Solyc03g007240.3
8	GO:0051301	BP	cell division	8/330	189/27940	0.00191053	0.261679	gene_Solyc06g065680.3;gene_Solyc09g015080.3;gene_Solyc10g074680.2;gene_Solyc05g050900.4;gene_Solyc03g116930.3;gene_Solyc02g092950.3;gene_Solyc11g006230.3;gene_Solyc03g112590.4	Solyc06g065680.3;Solyc09g015080.3;Solyc10g074680.2;Solyc05g050900.4;Solyc03g116930.3;Solyc02g092950.3;Solyc11g006230.3;Solyc03g112590.4
3	GO:0005871	CC	kinesin complex	3/330	21/27940	0.00185442	0.261679	gene_Solyc03g025470.5;gene_Solyc09g010810.3;gene_Solyc12g098630.2	Solyc03g025470.5;Solyc09g010810.3;Solyc12g098630.2
12	GO:0022402	BP	cell cycle process	12/330	380/27940	0.00202417	0.272699	gene_Solyc02g066980.1;gene_Solyc12g095870.3;gene_Solyc06g065680.3;gene_Solyc03g096890.3;gene_Solyc03g116950.2;gene_Solyc03g116930.3;gene_Solyc04g076310.4;gene_Solyc02g092950.3;gene_Solyc07g043320.3;gene_Solyc03g112590.4;gene_Solyc03g111790.4;gene_Solyc06g008510.3	Solyc02g066980.1;Solyc12g095870.3;Solyc06g065680.3;Solyc03g096890.3;Solyc03g116950.2;Solyc03g116930.3;Solyc04g076310.4;Solyc02g092950.3;Solyc07g043320.3;Solyc03g112590.4;Solyc03g111790.4;Solyc06g008510.3
8	GO:0009873	BP	ethylene-activated signaling pathway	8/330	192/27940	0.00210756	0.276356	gene_Solyc04g077490.3;gene_Solyc08g082210.4;gene_Solyc05g050340.4;gene_Solyc10g050970.1;gene_Solyc08g081960.3;gene_Solyc06g082590.1;gene_Solyc08g008305.1;gene_Solyc02g077370.1	Solyc04g077490.3;Solyc08g082210.4;Solyc05g050340.4;Solyc10g050970.1;Solyc08g081960.3;Solyc06g082590.1;Solyc08g008305.1;Solyc02g077370.1
3	GO:0032886	BP	regulation of microtubule-based process	3/330	22/27940	0.00212857	0.276356	gene_Solyc02g092950.3;gene_Solyc02g066980.1;gene_Solyc05g050900.4	Solyc02g092950.3;Solyc02g066980.1;Solyc05g050900.4
130	GO:0031224	CC	intrinsic component of membrane	130/330	8793/27940	0.00231139	0.292231	gene_Solyc12g006840.2;gene_Solyc10g006150.4;gene_Solyc10g078370.2;gene_Solyc08g067610.3;gene_Solyc02g070280.3;gene_Solyc12g006860.2;gene_Solyc12g042250.3;gene_Solyc07g006420.1;gene_Solyc01g106500.4;gene_Solyc08g075150.3;gene_Solyc02g080040.4;gene_Solyc06g069820.5;gene_Solyc02g072470.4;gene_Solyc01g005040.3;gene_Solyc01g068380.3;gene_Solyc11g069640.2;gene_Solyc09g011990.1;gene_Solyc02g032660.3;gen…	Solyc12g006840.2;Solyc10g006150.4;Solyc10g078370.2;Solyc08g067610.3;Solyc02g070280.3;Solyc12g006860.2;Solyc12g042250.3;Solyc07g006420.1;Solyc01g106500.4;Solyc08g075150.3;Solyc02g080040.4;Solyc06g069820.5;Solyc02g072470.4;Solyc01g005040.3;Solyc01g068380.3;Solyc11g069640.2;Solyc09g011990.1;Solyc02g032660.3;Solyc08g068870.3;Solyc12g009780.1;Solyc08g006210.4;Solyc10g049640.2;Solyc10g079860.2;Solyc06g…
74	GO:0016020	CC	membrane	74/330	4487/27940	0.00245961	0.306259	gene_Solyc08g081710.3;gene_Solyc12g006840.2;gene_Solyc07g009443.1;gene_Solyc08g066320.4;gene_Solyc09g091660.3;gene_Solyc03g120110.3;gene_Solyc10g075050.2;gene_Solyc02g068670.3;gene_Solyc06g048740.4;gene_Solyc10g078370.2;gene_Solyc01g006950.3;gene_Solyc06g075650.3;gene_Solyc07g008620.1;gene_Solyc02g079330.3;gene_Solyc08g077360.3;gene_Solyc05g050380.4;gene_Solyc08g067610.3;gene_Solyc02g070280.3;gen…	Solyc08g081710.3;Solyc12g006840.2;Solyc07g009443.1;Solyc08g066320.4;Solyc09g091660.3;Solyc03g120110.3;Solyc10g075050.2;Solyc02g068670.3;Solyc06g048740.4;Solyc10g078370.2;Solyc01g006950.3;Solyc06g075650.3;Solyc07g008620.1;Solyc02g079330.3;Solyc08g077360.3;Solyc05g050380.4;Solyc08g067610.3;Solyc02g070280.3;Solyc10g055390.2;Solyc12g042250.3;Solyc04g048900.3;Solyc02g081970.4;Solyc07g043070.3;Solyc11g…
44	GO:0016772	MF	transferase activity, transferring phosphorus-containing groups	44/330	2345/27940	0.00252931	0.310237	gene_Solyc07g008620.1;gene_Solyc12g006840.2;gene_Solyc07g009443.1;gene_Solyc08g066320.4;gene_Solyc03g096890.3;gene_Solyc11g005630.1;gene_Solyc06g048740.4;gene_Solyc03g120110.3;gene_Solyc06g019170.3;gene_Solyc05g008980.2;gene_Solyc07g045160.3;gene_Solyc05g043390.2;gene_Solyc03g078360.1;gene_Solyc04g074030.3;gene_Solyc01g106500.4;gene_Solyc11g065220.2;gene_Solyc04g077310.4;gene_Solyc09g011270.5;gen…	Solyc07g008620.1;Solyc12g006840.2;Solyc07g009443.1;Solyc08g066320.4;Solyc03g096890.3;Solyc11g005630.1;Solyc06g048740.4;Solyc03g120110.3;Solyc06g019170.3;Solyc05g008980.2;Solyc07g045160.3;Solyc05g043390.2;Solyc03g078360.1;Solyc04g074030.3;Solyc01g106500.4;Solyc11g065220.2;Solyc04g077310.4;Solyc09g011270.5;Solyc01g008500.4;Solyc07g055180.3;Solyc02g080040.4;Solyc02g072470.4;Solyc09g065570.5;Solyc11g…
2	GO:0015858	BP	nucleoside transport	2/330	7/27940	0.00280842	0.316159	gene_Solyc02g079330.3;gene_Solyc02g079350.3	Solyc02g079330.3;Solyc02g079350.3
2	GO:1901642	BP	nucleoside transmembrane transport	2/330	7/27940	0.00280842	0.316159	gene_Solyc02g079330.3;gene_Solyc02g079350.3	Solyc02g079330.3;Solyc02g079350.3
2	GO:0031110	BP	regulation of microtubule polymerization or depolymerization	2/330	7/27940	0.00280842	0.316159	gene_Solyc02g092950.3;gene_Solyc05g050900.4	Solyc02g092950.3;Solyc05g050900.4
4	GO:0005875	CC	microtubule associated complex	4/330	49/27940	0.0026645	0.316159	gene_Solyc03g025470.5;gene_Solyc09g010810.3;gene_Solyc12g095870.3;gene_Solyc12g098630.2	Solyc03g025470.5;Solyc09g010810.3;Solyc12g095870.3;Solyc12g098630.2
6	GO:0005615	CC	extracellular space	6/330	117/27940	0.0027091	0.316159	gene_Solyc01g008620.5;gene_Solyc02g082930.3;gene_Solyc02g069110.5;gene_Solyc07g041920.5;gene_Solyc06g034390.1;gene_Solyc02g077040.4	Solyc01g008620.5;Solyc02g082930.3;Solyc02g069110.5;Solyc07g041920.5;Solyc06g034390.1;Solyc02g077040.4
2	GO:0010369	CC	chromocenter	2/330	7/27940	0.00280842	0.316159	gene_Solyc01g086800.4;gene_Solyc01g073970.3	Solyc01g086800.4;Solyc01g073970.3
3	GO:0006596	BP	polyamine biosynthetic process	3/330	25/27940	0.00309699	0.343933	gene_Solyc05g010420.2;gene_Solyc04g082030.1;gene_Solyc03g007240.3	Solyc05g010420.2;Solyc04g082030.1;Solyc03g007240.3
63	GO:0035639	MF	purine ribonucleoside triphosphate binding	63/330	3723/27940	0.00321484	0.352261	gene_Solyc01g057320.3;gene_Solyc12g006840.2;gene_Solyc07g009443.1;gene_Solyc08g066320.4;gene_Solyc03g096890.3;gene_Solyc09g009200.3;gene_Solyc01g104770.4;gene_Solyc03g082430.1;gene_Solyc06g048740.4;gene_Solyc10g086340.1;gene_Solyc03g120110.3;gene_Solyc02g150128.1;gene_Solyc08g077360.3;gene_Solyc07g045160.3;gene_Solyc04g077540.4;gene_Solyc08g067610.3;gene_Solyc03g078360.1;gene_Solyc04g074030.3;gen…	Solyc01g057320.3;Solyc12g006840.2;Solyc07g009443.1;Solyc08g066320.4;Solyc03g096890.3;Solyc09g009200.3;Solyc01g104770.4;Solyc03g082430.1;Solyc06g048740.4;Solyc10g086340.1;Solyc03g120110.3;Solyc02g150128.1;Solyc08g077360.3;Solyc07g045160.3;Solyc04g077540.4;Solyc08g067610.3;Solyc03g078360.1;Solyc04g074030.3;Solyc01g103960.3;Solyc01g106500.4;Solyc09g091660.3;Solyc04g077310.4;Solyc09g082890.3;Solyc01g…
22	GO:0004674	MF	protein serine/threonine kinase activity	22/330	959/27940	0.00326411	0.352954	gene_Solyc12g006840.2;gene_Solyc07g009443.1;gene_Solyc11g005630.1;gene_Solyc06g048740.4;gene_Solyc03g120110.3;gene_Solyc03g078360.1;gene_Solyc04g074030.3;gene_Solyc03g006780.2;gene_Solyc07g055180.3;gene_Solyc02g080040.4;gene_Solyc02g072470.4;gene_Solyc09g065570.5;gene_Solyc09g011990.1;gene_Solyc12g042793.1;gene_Solyc02g080080.3;gene_Solyc01g106500.4;gene_Solyc04g074000.3;gene_Solyc04g006930.3;gen…	Solyc12g006840.2;Solyc07g009443.1;Solyc11g005630.1;Solyc06g048740.4;Solyc03g120110.3;Solyc03g078360.1;Solyc04g074030.3;Solyc03g006780.2;Solyc07g055180.3;Solyc02g080040.4;Solyc02g072470.4;Solyc09g065570.5;Solyc09g011990.1;Solyc12g042793.1;Solyc02g080080.3;Solyc01g106500.4;Solyc04g074000.3;Solyc04g006930.3;Solyc05g009040.3;Solyc04g077310.4;Solyc09g075920.1;Solyc12g095870.3
2	GO:0006021	BP	inositol biosynthetic process	2/330	8/27940	0.00371539	0.367869	gene_Solyc04g050860.4;gene_Solyc04g014800.3	Solyc04g050860.4;Solyc04g014800.3
2	GO:0019740	BP	nitrogen utilization	2/330	8/27940	0.00371539	0.367869	gene_Solyc03g083440.4;gene_Solyc10g076480.2	Solyc03g083440.4;Solyc10g076480.2
257	GO:0110165	CC	cellular anatomical entity	257/330	19780/27940	0.00414414	0.405435	gene_Solyc11g017270.2;gene_Solyc12g006840.2;gene_Solyc05g007890.5;gene_Solyc10g006150.4;gene_Solyc01g104770.4;gene_Solyc02g069110.5;gene_Solyc03g116950.2;gene_Solyc10g078370.2;gene_Solyc10g047150.3;gene_Solyc01g086800.4;gene_Solyc08g077360.3;gene_Solyc11g018772.1;gene_Solyc04g077540.4;gene_Solyc08g067610.3;gene_Solyc02g070280.3;gene_Solyc12g006860.2;gene_Solyc12g042250.3;gene_Solyc07g006420.1;gen…	Solyc11g017270.2;Solyc12g006840.2;Solyc05g007890.5;Solyc10g006150.4;Solyc01g104770.4;Solyc02g069110.5;Solyc03g116950.2;Solyc10g078370.2;Solyc10g047150.3;Solyc01g086800.4;Solyc08g077360.3;Solyc11g018772.1;Solyc04g077540.4;Solyc08g067610.3;Solyc02g070280.3;Solyc12g006860.2;Solyc12g042250.3;Solyc07g006420.1;Solyc01g103960.3;Solyc01g106500.4;Solyc08g075150.3;Solyc05g010420.2;Solyc02g080040.4;Solyc11g…
4	GO:0006857	BP	oligopeptide transport	4/330	56/27940	0.00433068	0.4187	gene_Solyc12g042240.2;gene_Solyc05g160250.1;gene_Solyc07g032490.3;gene_Solyc12g042250.3	Solyc12g042240.2;Solyc05g160250.1;Solyc07g032490.3;Solyc12g042250.3
4	GO:0015833	BP	peptide transport	4/330	57/27940	0.00461491	0.435923	gene_Solyc12g042240.2;gene_Solyc05g160250.1;gene_Solyc07g032490.3;gene_Solyc12g042250.3	Solyc12g042240.2;Solyc05g160250.1;Solyc07g032490.3;Solyc12g042250.3
2	GO:0006560	BP	proline metabolic process	2/330	9/27940	0.00473976	0.442555	gene_Solyc06g019170.3;gene_Solyc02g089630.3	Solyc06g019170.3;Solyc02g089630.3
10	GO:0006817	BP	phosphate ion transport	10/330	319/27940	0.00490421	0.442555	gene_Solyc07g032490.3;gene_Solyc03g080020.4;gene_Solyc12g042240.2;gene_Solyc02g085170.4;gene_Solyc06g054270.3;gene_Solyc02g079330.3;gene_Solyc02g079350.3;gene_Solyc05g160250.1;gene_Solyc10g055390.2;gene_Solyc12g042250.3	Solyc07g032490.3;Solyc03g080020.4;Solyc12g042240.2;Solyc02g085170.4;Solyc06g054270.3;Solyc02g079330.3;Solyc02g079350.3;Solyc05g160250.1;Solyc10g055390.2;Solyc12g042250.3
4	GO:0009606	BP	tropism	4/330	58/27940	0.00491143	0.442555	gene_Solyc02g092950.3;gene_Solyc04g076860.3;gene_Solyc10g084430.2;gene_Solyc10g074680.2	Solyc02g092950.3;Solyc04g076860.3;Solyc10g084430.2;Solyc10g074680.2
25	GO:0006468	BP	protein phosphorylation	25/330	1167/27940	0.00495438	0.442555	gene_Solyc12g006840.2;gene_Solyc07g009443.1;gene_Solyc08g066320.4;gene_Solyc03g096890.3;gene_Solyc11g005630.1;gene_Solyc06g048740.4;gene_Solyc03g120110.3;gene_Solyc05g008980.2;gene_Solyc03g078360.1;gene_Solyc04g074030.3;gene_Solyc03g006780.2;gene_Solyc01g008500.4;gene_Solyc07g055180.3;gene_Solyc02g080040.4;gene_Solyc02g072470.4;gene_Solyc09g011990.1;gene_Solyc11g017270.2;gene_Solyc01g067020.4;gen…	Solyc12g006840.2;Solyc07g009443.1;Solyc08g066320.4;Solyc03g096890.3;Solyc11g005630.1;Solyc06g048740.4;Solyc03g120110.3;Solyc05g008980.2;Solyc03g078360.1;Solyc04g074030.3;Solyc03g006780.2;Solyc01g008500.4;Solyc07g055180.3;Solyc02g080040.4;Solyc02g072470.4;Solyc09g011990.1;Solyc11g017270.2;Solyc01g067020.4;Solyc02g080080.3;Solyc05g008960.3;Solyc04g074000.3;Solyc04g006930.3;Solyc05g009040.3;Solyc09g…
127	GO:0016021	CC	integral component of membrane	127/330	8715/27940	0.0048961	0.442555	gene_Solyc12g006840.2;gene_Solyc10g006150.4;gene_Solyc10g078370.2;gene_Solyc08g067610.3;gene_Solyc02g070280.3;gene_Solyc12g006860.2;gene_Solyc12g042250.3;gene_Solyc07g006420.1;gene_Solyc01g106500.4;gene_Solyc08g075150.3;gene_Solyc02g080040.4;gene_Solyc06g069820.5;gene_Solyc02g072470.4;gene_Solyc01g005040.3;gene_Solyc01g068380.3;gene_Solyc11g069640.2;gene_Solyc09g011990.1;gene_Solyc02g032660.3;gen…	Solyc12g006840.2;Solyc10g006150.4;Solyc10g078370.2;Solyc08g067610.3;Solyc02g070280.3;Solyc12g006860.2;Solyc12g042250.3;Solyc07g006420.1;Solyc01g106500.4;Solyc08g075150.3;Solyc02g080040.4;Solyc06g069820.5;Solyc02g072470.4;Solyc01g005040.3;Solyc01g068380.3;Solyc11g069640.2;Solyc09g011990.1;Solyc02g032660.3;Solyc08g068870.3;Solyc12g009780.1;Solyc08g006210.4;Solyc10g049640.2;Solyc06g010030.4;Solyc09g…
6	GO:0000226	BP	microtubule cytoskeleton organization	6/330	134/27940	0.00526811	0.460567	gene_Solyc02g066980.1;gene_Solyc04g076310.4;gene_Solyc02g092950.3;gene_Solyc12g095870.3;gene_Solyc01g080750.3;gene_Solyc03g112590.4	Solyc02g066980.1;Solyc04g076310.4;Solyc02g092950.3;Solyc12g095870.3;Solyc01g080750.3;Solyc03g112590.4
12	GO:0006820	BP	anion transport	12/330	429/27940	0.00533282	0.461317	gene_Solyc01g087070.4;gene_Solyc07g032490.3;gene_Solyc03g080020.4;gene_Solyc12g042240.2;gene_Solyc02g085170.4;gene_Solyc06g054270.3;gene_Solyc02g079330.3;gene_Solyc02g079350.3;gene_Solyc05g160250.1;gene_Solyc02g070280.3;gene_Solyc10g055390.2;gene_Solyc12g042250.3	Solyc01g087070.4;Solyc07g032490.3;Solyc03g080020.4;Solyc12g042240.2;Solyc02g085170.4;Solyc06g054270.3;Solyc02g079330.3;Solyc02g079350.3;Solyc05g160250.1;Solyc02g070280.3;Solyc10g055390.2;Solyc12g042250.3
3	GO:1901264	BP	carbohydrate derivative transport	3/330	31/27940	0.00574501	0.483107	gene_Solyc02g079330.3;gene_Solyc02g079350.3;gene_Solyc01g087070.4	Solyc02g079330.3;Solyc02g079350.3;Solyc01g087070.4
4	GO:0006576	BP	cellular biogenic amine metabolic process	4/330	61/27940	0.005877	0.483107	gene_Solyc05g010420.2;gene_Solyc01g162830.1;gene_Solyc04g082030.1;gene_Solyc03g007240.3	Solyc05g010420.2;Solyc01g162830.1;Solyc04g082030.1;Solyc03g007240.3
4	GO:0044106	BP	cellular amine metabolic process	4/330	61/27940	0.005877	0.483107	gene_Solyc05g010420.2;gene_Solyc01g162830.1;gene_Solyc04g082030.1;gene_Solyc03g007240.3	Solyc05g010420.2;Solyc01g162830.1;Solyc04g082030.1;Solyc03g007240.3
2	GO:0005876	CC	spindle microtubule	2/330	10/27940	0.00587864	0.483107	gene_Solyc12g095870.3;gene_Solyc05g050900.4	Solyc12g095870.3;Solyc05g050900.4
9	GO:0106310	MF	protein serine kinase activity	9/330	279/27940	0.00621323	0.505548	gene_Solyc12g006840.2;gene_Solyc07g009443.1;gene_Solyc04g077310.4;gene_Solyc03g006780.2;gene_Solyc11g005630.1;gene_Solyc03g120110.3;gene_Solyc09g075920.1;gene_Solyc03g078360.1;gene_Solyc12g095870.3	Solyc12g006840.2;Solyc07g009443.1;Solyc04g077310.4;Solyc03g006780.2;Solyc11g005630.1;Solyc03g120110.3;Solyc09g075920.1;Solyc03g078360.1;Solyc12g095870.3
3	GO:0006595	BP	polyamine metabolic process	3/330	32/27940	0.00628458	0.50634	gene_Solyc05g010420.2;gene_Solyc04g082030.1;gene_Solyc03g007240.3	Solyc05g010420.2;Solyc04g082030.1;Solyc03g007240.3
8	GO:1903047	BP	mitotic cell cycle process	8/330	231/27940	0.00641491	0.511823	gene_Solyc02g066980.1;gene_Solyc03g116950.2;gene_Solyc03g116930.3;gene_Solyc04g076310.4;gene_Solyc06g065680.3;gene_Solyc07g043320.3;gene_Solyc12g095870.3;gene_Solyc03g112590.4	Solyc02g066980.1;Solyc03g116950.2;Solyc03g116930.3;Solyc04g076310.4;Solyc06g065680.3;Solyc07g043320.3;Solyc12g095870.3;Solyc03g112590.4
2	GO:0009927	MF	histidine phosphotransfer kinase activity	2/330	11/27940	0.00712921	0.563345	gene_Solyc01g098400.3;gene_Solyc08g066350.2	Solyc01g098400.3;Solyc08g066350.2
3	GO:0120255	BP	olefinic compound biosynthetic process	3/330	34/27940	0.00745176	0.577722	gene_Solyc10g086180.2;gene_Solyc03g117870.3;gene_Solyc12g005940.2	Solyc10g086180.2;Solyc03g117870.3;Solyc12g005940.2
4	GO:0042886	BP	amide transport	4/330	66/27940	0.00775307	0.589951	gene_Solyc12g042240.2;gene_Solyc05g160250.1;gene_Solyc07g032490.3;gene_Solyc12g042250.3	Solyc12g042240.2;Solyc05g160250.1;Solyc07g032490.3;Solyc12g042250.3
3	GO:0009629	BP	response to gravity	3/330	35/27940	0.0080801	0.603657	gene_Solyc04g076860.3;gene_Solyc10g084430.2;gene_Solyc10g074680.2	Solyc04g076860.3;Solyc10g084430.2;Solyc10g074680.2
3	GO:0009630	BP	gravitropism	3/330	35/27940	0.0080801	0.603657	gene_Solyc04g076860.3;gene_Solyc10g084430.2;gene_Solyc10g074680.2	Solyc04g076860.3;Solyc10g084430.2;Solyc10g074680.2
2	GO:0008216	BP	spermidine metabolic process	2/330	12/27940	0.00848867	0.611929	gene_Solyc05g010420.2;gene_Solyc03g007240.3	Solyc05g010420.2;Solyc03g007240.3
2	GO:0008295	BP	spermidine biosynthetic process	2/330	12/27940	0.00848867	0.611929	gene_Solyc05g010420.2;gene_Solyc03g007240.3	Solyc05g010420.2;Solyc03g007240.3
2	GO:0070417	BP	cellular response to cold	2/330	12/27940	0.00848867	0.611929	gene_Solyc01g103960.3;gene_Solyc03g083970.3	Solyc01g103960.3;Solyc03g083970.3
2	GO:0043424	MF	protein histidine kinase binding	2/330	12/27940	0.00848867	0.611929	gene_Solyc01g098400.3;gene_Solyc08g066350.2	Solyc01g098400.3;Solyc08g066350.2
3	GO:0120254	BP	olefinic compound metabolic process	3/330	36/27940	0.00873871	0.624476	gene_Solyc10g086180.2;gene_Solyc03g117870.3;gene_Solyc12g005940.2	Solyc10g086180.2;Solyc03g117870.3;Solyc12g005940.2
10	GO:0005618	CC	cell wall	10/330	352/27940	0.0095054	0.673408	gene_Solyc02g080200.5;gene_Solyc01g088300.3;gene_Solyc01g150176.2;gene_Solyc05g049980.3;gene_Solyc02g092950.3;gene_Solyc03g019890.3;gene_Solyc04g071900.5;gene_Solyc01g105070.3;gene_Solyc11g066130.1;gene_Solyc04g008210.2	Solyc02g080200.5;Solyc01g088300.3;Solyc01g150176.2;Solyc05g049980.3;Solyc02g092950.3;Solyc03g019890.3;Solyc04g071900.5;Solyc01g105070.3;Solyc11g066130.1;Solyc04g008210.2
62	GO:0032559	MF	adenyl ribonucleotide binding	62/330	3821/27940	0.00963982	0.677094	gene_Solyc01g057320.3;gene_Solyc12g006840.2;gene_Solyc07g009443.1;gene_Solyc08g066320.4;gene_Solyc03g096890.3;gene_Solyc09g009200.3;gene_Solyc01g104770.4;gene_Solyc03g082430.1;gene_Solyc06g048740.4;gene_Solyc10g086340.1;gene_Solyc03g120110.3;gene_Solyc02g150128.1;gene_Solyc05g008980.2;gene_Solyc07g045160.3;gene_Solyc04g077540.4;gene_Solyc08g067610.3;gene_Solyc03g078360.1;gene_Solyc04g074030.3;gen…	Solyc01g057320.3;Solyc12g006840.2;Solyc07g009443.1;Solyc08g066320.4;Solyc03g096890.3;Solyc09g009200.3;Solyc01g104770.4;Solyc03g082430.1;Solyc06g048740.4;Solyc10g086340.1;Solyc03g120110.3;Solyc02g150128.1;Solyc05g008980.2;Solyc07g045160.3;Solyc04g077540.4;Solyc08g067610.3;Solyc03g078360.1;Solyc04g074030.3;Solyc01g103960.3;Solyc01g106500.4;Solyc09g091660.3;Solyc04g077310.4;Solyc09g082890.3;Solyc01g…
10	GO:0015698	BP	inorganic anion transport	10/330	360/27940	0.0110034	0.683542	gene_Solyc07g032490.3;gene_Solyc03g080020.4;gene_Solyc12g042240.2;gene_Solyc02g085170.4;gene_Solyc06g054270.3;gene_Solyc02g079330.3;gene_Solyc02g079350.3;gene_Solyc05g160250.1;gene_Solyc10g055390.2;gene_Solyc12g042250.3	Solyc07g032490.3;Solyc03g080020.4;Solyc12g042240.2;Solyc02g085170.4;Solyc06g054270.3;Solyc02g079330.3;Solyc02g079350.3;Solyc05g160250.1;Solyc10g055390.2;Solyc12g042250.3
1	GO:0043155	BP	negative regulation of photosynthesis, light reaction	1/330	1/27940	0.011811	0.683542	gene_Solyc03g116730.5	Solyc03g116730.5
1	GO:0072351	BP	tricarboxylic acid biosynthetic process	1/330	1/27940	0.011811	0.683542	gene_Solyc01g162830.1	Solyc01g162830.1
1	GO:0031155	BP	regulation of reproductive fruiting body development	1/330	1/27940	0.011811	0.683542	gene_Solyc05g007770.3	Solyc05g007770.3
1	GO:0010205	BP	photoinhibition	1/330	1/27940	0.011811	0.683542	gene_Solyc03g116730.5	Solyc03g116730.5
1	GO:0030417	BP	nicotianamine metabolic process	1/330	1/27940	0.011811	0.683542	gene_Solyc01g162830.1	Solyc01g162830.1
1	GO:0030418	BP	nicotianamine biosynthetic process	1/330	1/27940	0.011811	0.683542	gene_Solyc01g162830.1	Solyc01g162830.1
1	GO:0075260	BP	regulation of spore-bearing organ development	1/330	1/27940	0.011811	0.683542	gene_Solyc05g007770.3	Solyc05g007770.3
1	GO:0097054	BP	L-glutamate biosynthetic process	1/330	1/27940	0.011811	0.683542	gene_Solyc03g083440.4	Solyc03g083440.4
1	GO:0009955	BP	adaxial/abaxial pattern specification	1/330	1/27940	0.011811	0.683542	gene_Solyc11g006230.3	Solyc11g006230.3
10	GO:0030312	CC	external encapsulating structure	10/330	358/27940	0.0106132	0.683542	gene_Solyc02g080200.5;gene_Solyc01g088300.3;gene_Solyc01g150176.2;gene_Solyc05g049980.3;gene_Solyc02g092950.3;gene_Solyc03g019890.3;gene_Solyc04g071900.5;gene_Solyc01g105070.3;gene_Solyc11g066130.1;gene_Solyc04g008210.2	Solyc02g080200.5;Solyc01g088300.3;Solyc01g150176.2;Solyc05g049980.3;Solyc02g092950.3;Solyc03g019890.3;Solyc04g071900.5;Solyc01g105070.3;Solyc11g066130.1;Solyc04g008210.2
3	GO:0005819	CC	spindle	3/330	40/27940	0.0116815	0.683542	gene_Solyc02g092950.3;gene_Solyc02g066980.1;gene_Solyc05g050900.4	Solyc02g092950.3;Solyc02g066980.1;Solyc05g050900.4
62	GO:0030554	MF	adenyl nucleotide binding	62/330	3837/27940	0.00982772	0.683542	gene_Solyc01g057320.3;gene_Solyc12g006840.2;gene_Solyc07g009443.1;gene_Solyc08g066320.4;gene_Solyc03g096890.3;gene_Solyc09g009200.3;gene_Solyc01g104770.4;gene_Solyc03g082430.1;gene_Solyc06g048740.4;gene_Solyc10g086340.1;gene_Solyc03g120110.3;gene_Solyc02g150128.1;gene_Solyc05g008980.2;gene_Solyc07g045160.3;gene_Solyc04g077540.4;gene_Solyc08g067610.3;gene_Solyc03g078360.1;gene_Solyc04g074030.3;gen…	Solyc01g057320.3;Solyc12g006840.2;Solyc07g009443.1;Solyc08g066320.4;Solyc03g096890.3;Solyc09g009200.3;Solyc01g104770.4;Solyc03g082430.1;Solyc06g048740.4;Solyc10g086340.1;Solyc03g120110.3;Solyc02g150128.1;Solyc05g008980.2;Solyc07g045160.3;Solyc04g077540.4;Solyc08g067610.3;Solyc03g078360.1;Solyc04g074030.3;Solyc01g103960.3;Solyc01g106500.4;Solyc09g091660.3;Solyc04g077310.4;Solyc09g082890.3;Solyc01g…
2	GO:0016844	MF	strictosidine synthase activity	2/330	14/27940	0.0115234	0.683542	gene_Solyc12g039070.2;gene_Solyc03g114530.5	Solyc12g039070.2;Solyc03g114530.5
1	GO:0019894	MF	kinesin binding	1/330	1/27940	0.011811	0.683542	gene_Solyc03g096890.3	Solyc03g096890.3
1	GO:0047213	MF	anthocyanidin 3-O-glucosyltransferase activity	1/330	1/27940	0.011811	0.683542	gene_Solyc03g078490.5	Solyc03g078490.5
1	GO:0010347	MF	L-galactose-1-phosphate phosphatase activity	1/330	1/27940	0.011811	0.683542	gene_Solyc04g014800.3	Solyc04g014800.3
1	GO:0030410	MF	nicotianamine synthase activity	1/330	1/27940	0.011811	0.683542	gene_Solyc01g162830.1	Solyc01g162830.1
1	GO:0000721	MF	(R,R)-butanediol dehydrogenase activity	1/330	1/27940	0.011811	0.683542	gene_Solyc12g013620.2	Solyc12g013620.2
1	GO:0042389	MF	omega-3 fatty acid desaturase activity	1/330	1/27940	0.011811	0.683542	gene_Solyc03g116730.5	Solyc03g116730.5
1	GO:0070456	MF	galactose-1-phosphate phosphatase activity	1/330	1/27940	0.011811	0.683542	gene_Solyc04g014800.3	Solyc04g014800.3
1	GO:0015398	MF	high-affinity secondary active ammonium transmembrane transporter activity	1/330	1/27940	0.011811	0.683542	gene_Solyc10g076480.2	Solyc10g076480.2
1	GO:0009979	MF	16:0 monogalactosyldiacylglycerol desaturase activity	1/330	1/27940	0.011811	0.683542	gene_Solyc03g116730.5	Solyc03g116730.5
2	GO:0080167	BP	response to karrikin	2/330	15/27940	0.0131934	0.758206	gene_Solyc03g019890.3;gene_Solyc04g014800.3	Solyc03g019890.3;Solyc04g014800.3
2	GO:0072686	CC	mitotic spindle	2/330	16/27940	0.0149617	0.847964	gene_Solyc02g066980.1;gene_Solyc05g050900.4	Solyc02g066980.1;Solyc05g050900.4
2	GO:0016843	MF	amine-lyase activity	2/330	16/27940	0.0149617	0.847964	gene_Solyc12g039070.2;gene_Solyc03g114530.5	Solyc12g039070.2;Solyc03g114530.5
3	GO:0071310	BP	cellular response to organic substance	3/330	44/27940	0.0151283	0.849108	gene_Solyc01g103960.3;gene_Solyc03g117630.1;gene_Solyc03g083970.3	Solyc01g103960.3;Solyc03g117630.1;Solyc03g083970.3
75	GO:0043168	MF	anion binding	75/330	4892/27940	0.0159323	0.872879	gene_Solyc01g057320.3;gene_Solyc12g006840.2;gene_Solyc07g009443.1;gene_Solyc08g066320.4;gene_Solyc03g096890.3;gene_Solyc09g009200.3;gene_Solyc01g104770.4;gene_Solyc03g082430.1;gene_Solyc06g048740.4;gene_Solyc10g086340.1;gene_Solyc03g120110.3;gene_Solyc02g150128.1;gene_Solyc08g077360.3;gene_Solyc07g045160.3;gene_Solyc02g071470.5;gene_Solyc04g077540.4;gene_Solyc08g067610.3;gene_Solyc03g078360.1;gen…	Solyc01g057320.3;Solyc12g006840.2;Solyc07g009443.1;Solyc08g066320.4;Solyc03g096890.3;Solyc09g009200.3;Solyc01g104770.4;Solyc03g082430.1;Solyc06g048740.4;Solyc10g086340.1;Solyc03g120110.3;Solyc02g150128.1;Solyc08g077360.3;Solyc07g045160.3;Solyc02g071470.5;Solyc04g077540.4;Solyc08g067610.3;Solyc03g078360.1;Solyc04g074030.3;Solyc01g103960.3;Solyc01g106500.4;Solyc09g091660.3;Solyc04g077310.4;Solyc09g…
3	GO:0016840	MF	carbon-nitrogen lyase activity	3/330	45/27940	0.01607	0.874591	gene_Solyc10g086180.2;gene_Solyc12g039070.2;gene_Solyc03g114530.5	Solyc10g086180.2;Solyc12g039070.2;Solyc03g114530.5
2	GO:0006536	BP	glutamate metabolic process	2/330	17/27940	0.0168256	0.901049	gene_Solyc03g083440.4;gene_Solyc02g089630.3	Solyc03g083440.4;Solyc02g089630.3
66	GO:0097367	MF	carbohydrate derivative binding	66/330	4246/27940	0.0167498	0.901049	gene_Solyc01g057320.3;gene_Solyc12g006840.2;gene_Solyc07g009443.1;gene_Solyc08g066320.4;gene_Solyc03g096890.3;gene_Solyc09g009200.3;gene_Solyc01g104770.4;gene_Solyc03g082430.1;gene_Solyc06g048740.4;gene_Solyc10g086340.1;gene_Solyc03g120110.3;gene_Solyc01g097280.3;gene_Solyc02g150128.1;gene_Solyc08g077360.3;gene_Solyc07g045160.3;gene_Solyc04g077540.4;gene_Solyc08g067610.3;gene_Solyc03g078360.1;gen…	Solyc01g057320.3;Solyc12g006840.2;Solyc07g009443.1;Solyc08g066320.4;Solyc03g096890.3;Solyc09g009200.3;Solyc01g104770.4;Solyc03g082430.1;Solyc06g048740.4;Solyc10g086340.1;Solyc03g120110.3;Solyc01g097280.3;Solyc02g150128.1;Solyc08g077360.3;Solyc07g045160.3;Solyc04g077540.4;Solyc08g067610.3;Solyc03g078360.1;Solyc04g074030.3;Solyc01g103960.3;Solyc01g106500.4;Solyc09g091660.3;Solyc04g077310.4;Solyc09g…
41	GO:0006950	BP	response to stress	41/330	2409/27940	0.0175057	0.916317	gene_Solyc07g032490.3;gene_Solyc01g150176.2;gene_Solyc03g095650.3;gene_Solyc01g097280.3;gene_Solyc11g018772.1;gene_Solyc01g105070.3;gene_Solyc03g111790.4;gene_Solyc04g048900.3;gene_Solyc01g103960.3;gene_Solyc09g084480.3;gene_Solyc09g084470.3;gene_Solyc03g116930.3;gene_Solyc08g081960.3;gene_Solyc06g082590.1;gene_Solyc10g086380.1;gene_Solyc09g011990.1;gene_Solyc02g077370.1;gene_Solyc02g086530.4;gen…	Solyc07g032490.3;Solyc01g150176.2;Solyc03g095650.3;Solyc01g097280.3;Solyc11g018772.1;Solyc01g105070.3;Solyc03g111790.4;Solyc04g048900.3;Solyc01g103960.3;Solyc09g084480.3;Solyc09g084470.3;Solyc03g116930.3;Solyc08g081960.3;Solyc06g082590.1;Solyc10g086380.1;Solyc09g011990.1;Solyc02g077370.1;Solyc02g086530.4;Solyc04g014800.3;Solyc03g112590.4;Solyc07g008620.1;Solyc04g077490.3;Solyc10g050970.1;Solyc03g…
7	GO:0046777	BP	protein autophosphorylation	7/330	225/27940	0.0179444	0.921671	gene_Solyc04g074000.3;gene_Solyc12g006840.2;gene_Solyc03g006780.2;gene_Solyc06g048740.4;gene_Solyc03g120110.3;gene_Solyc02g072470.4;gene_Solyc04g074030.3	Solyc04g074000.3;Solyc12g006840.2;Solyc03g006780.2;Solyc06g048740.4;Solyc03g120110.3;Solyc02g072470.4;Solyc04g074030.3
4	GO:0006865	BP	amino acid transport	4/330	85/27940	0.0183174	0.924295	gene_Solyc04g079560.3;gene_Solyc02g070280.3;gene_Solyc09g098380.3;gene_Solyc11g006710.2	Solyc04g079560.3;Solyc02g070280.3;Solyc09g098380.3;Solyc11g006710.2
52	GO:0050896	BP	response to stimulus	52/330	3200/27940	0.0184489	0.924295	gene_Solyc07g008620.1;gene_Solyc07g032490.3;gene_Solyc01g150176.2;gene_Solyc03g095650.3;gene_Solyc01g097280.3;gene_Solyc11g018772.1;gene_Solyc01g105070.3;gene_Solyc03g111790.4;gene_Solyc12g006860.2;gene_Solyc04g048900.3;gene_Solyc01g103960.3;gene_Solyc09g084480.3;gene_Solyc09g084470.3;gene_Solyc03g117630.1;gene_Solyc03g116930.3;gene_Solyc08g081960.3;gene_Solyc06g082590.1;gene_Solyc10g086380.1;gen…	Solyc07g008620.1;Solyc07g032490.3;Solyc01g150176.2;Solyc03g095650.3;Solyc01g097280.3;Solyc11g018772.1;Solyc01g105070.3;Solyc03g111790.4;Solyc12g006860.2;Solyc04g048900.3;Solyc01g103960.3;Solyc09g084480.3;Solyc09g084470.3;Solyc03g117630.1;Solyc03g116930.3;Solyc08g081960.3;Solyc06g082590.1;Solyc10g086380.1;Solyc09g011990.1;Solyc02g077370.1;Solyc02g086530.4;Solyc10g076480.2;Solyc03g112590.4;Solyc03g…
6	GO:0007010	BP	cytoskeleton organization	6/330	176/27940	0.0185146	0.924295	gene_Solyc02g066980.1;gene_Solyc04g076310.4;gene_Solyc02g092950.3;gene_Solyc12g095870.3;gene_Solyc01g080750.3;gene_Solyc03g112590.4	Solyc02g066980.1;Solyc04g076310.4;Solyc02g092950.3;Solyc12g095870.3;Solyc01g080750.3;Solyc03g112590.4
2	GO:0006986	BP	response to unfolded protein	2/330	18/27940	0.0187828	0.924295	gene_Solyc03g117630.1;gene_Solyc03g083970.3	Solyc03g117630.1;Solyc03g083970.3
2	GO:0009800	BP	cinnamic acid biosynthetic process	2/330	18/27940	0.0187828	0.924295	gene_Solyc10g086180.2;gene_Solyc03g117870.3	Solyc10g086180.2;Solyc03g117870.3
2	GO:0009803	BP	cinnamic acid metabolic process	2/330	18/27940	0.0187828	0.924295	gene_Solyc10g086180.2;gene_Solyc03g117870.3	Solyc10g086180.2;Solyc03g117870.3
2	GO:0034620	BP	cellular response to unfolded protein	2/330	18/27940	0.0187828	0.924295	gene_Solyc03g117630.1;gene_Solyc03g083970.3	Solyc03g117630.1;Solyc03g083970.3
6	GO:0008037	BP	cell recognition	6/330	178/27940	0.0194549	0.946036	gene_Solyc07g009443.1;gene_Solyc04g077310.4;gene_Solyc03g006780.2;gene_Solyc11g005630.1;gene_Solyc09g075920.1;gene_Solyc03g078360.1	Solyc07g009443.1;Solyc04g077310.4;Solyc03g006780.2;Solyc11g005630.1;Solyc09g075920.1;Solyc03g078360.1
6	GO:0048544	BP	recognition of pollen	6/330	178/27940	0.0194549	0.946036	gene_Solyc07g009443.1;gene_Solyc04g077310.4;gene_Solyc03g006780.2;gene_Solyc11g005630.1;gene_Solyc09g075920.1;gene_Solyc03g078360.1	Solyc07g009443.1;Solyc04g077310.4;Solyc03g006780.2;Solyc11g005630.1;Solyc09g075920.1;Solyc03g078360.1
65	GO:0032553	MF	ribonucleotide binding	65/330	4182/27940	0.0195741	0.946237	gene_Solyc01g057320.3;gene_Solyc12g006840.2;gene_Solyc07g009443.1;gene_Solyc08g066320.4;gene_Solyc03g096890.3;gene_Solyc09g009200.3;gene_Solyc01g104770.4;gene_Solyc03g082430.1;gene_Solyc06g048740.4;gene_Solyc10g086340.1;gene_Solyc03g120110.3;gene_Solyc02g150128.1;gene_Solyc08g077360.3;gene_Solyc07g045160.3;gene_Solyc04g077540.4;gene_Solyc08g067610.3;gene_Solyc03g078360.1;gene_Solyc04g074030.3;gen…	Solyc01g057320.3;Solyc12g006840.2;Solyc07g009443.1;Solyc08g066320.4;Solyc03g096890.3;Solyc09g009200.3;Solyc01g104770.4;Solyc03g082430.1;Solyc06g048740.4;Solyc10g086340.1;Solyc03g120110.3;Solyc02g150128.1;Solyc08g077360.3;Solyc07g045160.3;Solyc04g077540.4;Solyc08g067610.3;Solyc03g078360.1;Solyc04g074030.3;Solyc01g103960.3;Solyc01g106500.4;Solyc09g091660.3;Solyc04g077310.4;Solyc09g082890.3;Solyc01g…
21	GO:0006952	BP	defense response	21/330	1062/27940	0.0198609	0.946867	gene_Solyc07g008620.1;gene_Solyc04g077490.3;gene_Solyc08g082210.4;gene_Solyc01g150176.2;gene_Solyc08g080620.1;gene_Solyc05g050340.4;gene_Solyc01g008620.5;gene_Solyc02g082930.3;gene_Solyc10g050970.1;gene_Solyc08g081960.3;gene_Solyc03g095650.3;gene_Solyc01g097280.3;gene_Solyc06g082590.1;gene_Solyc02g077370.1;gene_Solyc10g079860.2;gene_Solyc06g010030.4;gene_Solyc08g008305.1;gene_Solyc01g109110.3;gen…	Solyc07g008620.1;Solyc04g077490.3;Solyc08g082210.4;Solyc01g150176.2;Solyc08g080620.1;Solyc05g050340.4;Solyc01g008620.5;Solyc02g082930.3;Solyc10g050970.1;Solyc08g081960.3;Solyc03g095650.3;Solyc01g097280.3;Solyc06g082590.1;Solyc02g077370.1;Solyc10g079860.2;Solyc06g010030.4;Solyc08g008305.1;Solyc01g109110.3;Solyc04g007320.3;Solyc09g011990.1;Solyc11g066130.1
31	GO:0022857	MF	transmembrane transporter activity	31/330	1717/27940	0.020198	0.948497	gene_Solyc07g032490.3;gene_Solyc09g091660.3;gene_Solyc10g078370.2;gene_Solyc02g071100.3;gene_Solyc02g079330.3;gene_Solyc08g067610.3;gene_Solyc05g050380.4;gene_Solyc08g077370.4;gene_Solyc02g085170.4;gene_Solyc12g042250.3;gene_Solyc11g006710.2;gene_Solyc02g070280.3;gene_Solyc06g054270.3;gene_Solyc02g079350.3;gene_Solyc03g097600.4;gene_Solyc05g160250.1;gene_Solyc10g076480.2;gene_Solyc02g032660.3;gen…	Solyc07g032490.3;Solyc09g091660.3;Solyc10g078370.2;Solyc02g071100.3;Solyc02g079330.3;Solyc08g067610.3;Solyc05g050380.4;Solyc08g077370.4;Solyc02g085170.4;Solyc12g042250.3;Solyc11g006710.2;Solyc02g070280.3;Solyc06g054270.3;Solyc02g079350.3;Solyc03g097600.4;Solyc05g160250.1;Solyc10g076480.2;Solyc02g032660.3;Solyc04g074880.2;Solyc07g008440.3;Solyc01g087070.4;Solyc05g050350.2;Solyc10g049640.2;Solyc06g…
4	GO:0043648	BP	dicarboxylic acid metabolic process	4/330	89/27940	0.0213014	0.963616	gene_Solyc03g083440.4;gene_Solyc03g120990.3;gene_Solyc02g089630.3;gene_Solyc11g009080.2	Solyc03g083440.4;Solyc03g120990.3;Solyc02g089630.3;Solyc11g009080.2
1	GO:1905725	BP	protein localization to microtubule end	1/330	2/27940	0.023483	0.963616	gene_Solyc02g092950.3	Solyc02g092950.3
1	GO:0019676	BP	ammonia assimilation cycle	1/330	2/27940	0.023483	0.963616	gene_Solyc03g083440.4	Solyc03g083440.4
1	GO:1904825	BP	protein localization to microtubule plus-end	1/330	2/27940	0.023483	0.963616	gene_Solyc02g092950.3	Solyc02g092950.3
1	GO:0090610	BP	bundle sheath cell fate specification	1/330	2/27940	0.023483	0.963616	gene_Solyc10g074680.2	Solyc10g074680.2
1	GO:0035372	BP	protein localization to microtubule	1/330	2/27940	0.023483	0.963616	gene_Solyc02g092950.3	Solyc02g092950.3
1	GO:0034214	BP	protein hexamerization	1/330	2/27940	0.023483	0.963616	gene_Solyc12g010030.3	Solyc12g010030.3
1	GO:0051457	BP	maintenance of protein location in nucleus	1/330	2/27940	0.023483	0.963616	gene_Solyc10g074680.2	Solyc10g074680.2
1	GO:0009652	BP	thigmotropism	1/330	2/27940	0.023483	0.963616	gene_Solyc02g092950.3	Solyc02g092950.3
1	GO:0071821	CC	FANCM-MHF complex	1/330	2/27940	0.023483	0.963616	gene_Solyc03g111790.4	Solyc03g111790.4
1	GO:0005948	CC	acetolactate synthase complex	1/330	2/27940	0.023483	0.963616	gene_Solyc03g044330.1	Solyc03g044330.1
1	GO:1990752	CC	microtubule end	1/330	2/27940	0.023483	0.963616	gene_Solyc02g092950.3	Solyc02g092950.3
1	GO:0035371	CC	microtubule plus-end	1/330	2/27940	0.023483	0.963616	gene_Solyc02g092950.3	Solyc02g092950.3
3	GO:0005764	CC	lysosome	3/330	52/27940	0.0235686	0.963616	gene_Solyc02g077040.4;gene_Solyc07g041920.5;gene_Solyc02g069110.5	Solyc02g077040.4;Solyc07g041920.5;Solyc02g069110.5
64	GO:0032555	MF	purine ribonucleotide binding	64/330	4140/27940	0.0234483	0.963616	gene_Solyc01g057320.3;gene_Solyc12g006840.2;gene_Solyc07g009443.1;gene_Solyc08g066320.4;gene_Solyc03g096890.3;gene_Solyc09g009200.3;gene_Solyc01g104770.4;gene_Solyc03g082430.1;gene_Solyc06g048740.4;gene_Solyc10g086340.1;gene_Solyc03g120110.3;gene_Solyc02g150128.1;gene_Solyc08g077360.3;gene_Solyc07g045160.3;gene_Solyc04g077540.4;gene_Solyc08g067610.3;gene_Solyc03g078360.1;gene_Solyc04g074030.3;gen…	Solyc01g057320.3;Solyc12g006840.2;Solyc07g009443.1;Solyc08g066320.4;Solyc03g096890.3;Solyc09g009200.3;Solyc01g104770.4;Solyc03g082430.1;Solyc06g048740.4;Solyc10g086340.1;Solyc03g120110.3;Solyc02g150128.1;Solyc08g077360.3;Solyc07g045160.3;Solyc04g077540.4;Solyc08g067610.3;Solyc03g078360.1;Solyc04g074030.3;Solyc01g103960.3;Solyc01g106500.4;Solyc09g091660.3;Solyc04g077310.4;Solyc09g082890.3;Solyc01g…
1	GO:0047274	MF	galactinol-sucrose galactosyltransferase activity	1/330	2/27940	0.023483	0.963616	gene_Solyc02g086530.4	Solyc02g086530.4
1	GO:0048307	MF	ferredoxin-nitrite reductase activity	1/330	2/27940	0.023483	0.963616	gene_Solyc10g050890.2	Solyc10g050890.2
1	GO:0015930	MF	glutamate synthase activity	1/330	2/27940	0.023483	0.963616	gene_Solyc03g083440.4	Solyc03g083440.4
1	GO:0045181	MF	glutamate synthase activity, NAD(P)H as acceptor	1/330	2/27940	0.023483	0.963616	gene_Solyc03g083440.4	Solyc03g083440.4
1	GO:0008395	MF	steroid hydroxylase activity	1/330	2/27940	0.023483	0.963616	gene_Solyc12g006860.2	Solyc12g006860.2
1	GO:0051010	MF	microtubule plus-end binding	1/330	2/27940	0.023483	0.963616	gene_Solyc02g092950.3	Solyc02g092950.3
1	GO:0004349	MF	glutamate 5-kinase activity	1/330	2/27940	0.023483	0.963616	gene_Solyc06g019170.3	Solyc06g019170.3
1	GO:0004657	MF	proline dehydrogenase activity	1/330	2/27940	0.023483	0.963616	gene_Solyc02g089630.3	Solyc02g089630.3
1	GO:0016040	MF	glutamate synthase (NADH) activity	1/330	2/27940	0.023483	0.963616	gene_Solyc03g083440.4	Solyc03g083440.4
1	GO:0016664	MF	oxidoreductase activity, acting on other nitrogenous compounds as donors, iron-sulfur protein as acceptor	1/330	2/27940	0.023483	0.963616	gene_Solyc10g050890.2	Solyc10g050890.2
64	GO:0017076	MF	purine nucleotide binding	64/330	4161/27940	0.0239652	0.974978	gene_Solyc01g057320.3;gene_Solyc12g006840.2;gene_Solyc07g009443.1;gene_Solyc08g066320.4;gene_Solyc03g096890.3;gene_Solyc09g009200.3;gene_Solyc01g104770.4;gene_Solyc03g082430.1;gene_Solyc06g048740.4;gene_Solyc10g086340.1;gene_Solyc03g120110.3;gene_Solyc02g150128.1;gene_Solyc08g077360.3;gene_Solyc07g045160.3;gene_Solyc04g077540.4;gene_Solyc08g067610.3;gene_Solyc03g078360.1;gene_Solyc04g074030.3;gen…	Solyc01g057320.3;Solyc12g006840.2;Solyc07g009443.1;Solyc08g066320.4;Solyc03g096890.3;Solyc09g009200.3;Solyc01g104770.4;Solyc03g082430.1;Solyc06g048740.4;Solyc10g086340.1;Solyc03g120110.3;Solyc02g150128.1;Solyc08g077360.3;Solyc07g045160.3;Solyc04g077540.4;Solyc08g067610.3;Solyc03g078360.1;Solyc04g074030.3;Solyc01g103960.3;Solyc01g106500.4;Solyc09g091660.3;Solyc04g077310.4;Solyc09g082890.3;Solyc01g…
2	GO:0035967	BP	cellular response to topologically incorrect protein	2/330	21/27940	0.0251896	1	gene_Solyc03g117630.1;gene_Solyc03g083970.3	Solyc03g117630.1;Solyc03g083970.3
2	GO:0035966	BP	response to topologically incorrect protein	2/330	21/27940	0.0251896	1	gene_Solyc03g117630.1;gene_Solyc03g083970.3	Solyc03g117630.1;Solyc03g083970.3
4	GO:0051338	BP	regulation of transferase activity	4/330	97/27940	0.0281182	1	gene_Solyc02g066980.1;gene_Solyc06g065680.3;gene_Solyc07g043320.3;gene_Solyc06g043150.4	Solyc02g066980.1;Solyc06g065680.3;Solyc07g043320.3;Solyc06g043150.4
2	GO:0010150	BP	leaf senescence	2/330	23/27940	0.0298832	1	gene_Solyc01g009860.3;gene_Solyc05g007770.3	Solyc01g009860.3;Solyc05g007770.3
2	GO:0090693	BP	plant organ senescence	2/330	24/27940	0.03235	1	gene_Solyc01g009860.3;gene_Solyc05g007770.3	Solyc01g009860.3;Solyc05g007770.3
1	GO:0052315	BP	phytoalexin biosynthetic process	1/330	3/27940	0.0350175	1	gene_Solyc03g117870.3	Solyc03g117870.3
1	GO:0052314	BP	phytoalexin metabolic process	1/330	3/27940	0.0350175	1	gene_Solyc03g117870.3	Solyc03g117870.3
1	GO:0006537	BP	glutamate biosynthetic process	1/330	3/27940	0.0350175	1	gene_Solyc03g083440.4	Solyc03g083440.4
1	GO:0009558	BP	embryo sac cellularization	1/330	3/27940	0.0350175	1	gene_Solyc03g096890.3	Solyc03g096890.3
1	GO:0033494	BP	ferulate metabolic process	1/330	3/27940	0.0350175	1	gene_Solyc03g117870.3	Solyc03g117870.3
1	GO:0044380	BP	protein localization to cytoskeleton	1/330	3/27940	0.0350175	1	gene_Solyc02g092950.3	Solyc02g092950.3
1	GO:0010133	BP	proline catabolic process to glutamate	1/330	3/27940	0.0350175	1	gene_Solyc02g089630.3	Solyc02g089630.3
1	GO:0006562	BP	proline catabolic process	1/330	3/27940	0.0350175	1	gene_Solyc02g089630.3	Solyc02g089630.3
1	GO:0009403	BP	toxin biosynthetic process	1/330	3/27940	0.0350175	1	gene_Solyc03g117870.3	Solyc03g117870.3
1	GO:0009404	BP	toxin metabolic process	1/330	3/27940	0.0350175	1	gene_Solyc03g117870.3	Solyc03g117870.3
1	GO:0051382	BP	kinetochore assembly	1/330	3/27940	0.0350175	1	gene_Solyc03g111790.4	Solyc03g111790.4
1	GO:0072698	BP	protein localization to microtubule cytoskeleton	1/330	3/27940	0.0350175	1	gene_Solyc02g092950.3	Solyc02g092950.3
22	GO:0007165	BP	signal transduction	22/330	1172/27940	0.0363494	1	gene_Solyc10g078370.2;gene_Solyc02g150128.1;gene_Solyc08g081960.3;gene_Solyc06g082590.1;gene_Solyc10g086380.1;gene_Solyc04g014800.3;gene_Solyc06g008510.3;gene_Solyc04g077490.3;gene_Solyc04g007800.5;gene_Solyc03g081270.2;gene_Solyc10g050970.1;gene_Solyc04g048900.3;gene_Solyc04g007320.3;gene_Solyc01g098400.3;gene_Solyc08g066350.2;gene_Solyc02g077370.1;gene_Solyc08g082210.4;gene_Solyc05g050340.4;gen…	Solyc10g078370.2;Solyc02g150128.1;Solyc08g081960.3;Solyc06g082590.1;Solyc10g086380.1;Solyc04g014800.3;Solyc06g008510.3;Solyc04g077490.3;Solyc04g007800.5;Solyc03g081270.2;Solyc10g050970.1;Solyc04g048900.3;Solyc04g007320.3;Solyc01g098400.3;Solyc08g066350.2;Solyc02g077370.1;Solyc08g082210.4;Solyc05g050340.4;Solyc08g082630.3;Solyc12g096890.1;Solyc01g109110.3;Solyc08g008305.1
12	GO:0035556	BP	intracellular signal transduction	12/330	523/27940	0.0364028	1	gene_Solyc04g077490.3;gene_Solyc08g082210.4;gene_Solyc05g050340.4;gene_Solyc03g081270.2;gene_Solyc10g050970.1;gene_Solyc08g081960.3;gene_Solyc06g082590.1;gene_Solyc08g008305.1;gene_Solyc02g077370.1;gene_Solyc01g098400.3;gene_Solyc08g066350.2;gene_Solyc06g008510.3	Solyc04g077490.3;Solyc08g082210.4;Solyc05g050340.4;Solyc03g081270.2;Solyc10g050970.1;Solyc08g081960.3;Solyc06g082590.1;Solyc08g008305.1;Solyc02g077370.1;Solyc01g098400.3;Solyc08g066350.2;Solyc06g008510.3
3	GO:0051493	BP	regulation of cytoskeleton organization	3/330	64/27940	0.0401095	1	gene_Solyc02g092950.3;gene_Solyc02g066980.1;gene_Solyc05g050900.4	Solyc02g092950.3;Solyc02g066980.1;Solyc05g050900.4
2	GO:0006020	BP	inositol metabolic process	2/330	27/27940	0.0402036	1	gene_Solyc04g050860.4;gene_Solyc04g014800.3	Solyc04g050860.4;Solyc04g014800.3
2	GO:0009736	BP	cytokinin-activated signaling pathway	2/330	27/27940	0.0402036	1	gene_Solyc01g098400.3;gene_Solyc08g066350.2	Solyc01g098400.3;Solyc08g066350.2
2	GO:0043650	BP	dicarboxylic acid biosynthetic process	2/330	28/27940	0.0429656	1	gene_Solyc03g083440.4;gene_Solyc11g009080.2	Solyc03g083440.4;Solyc11g009080.2
2	GO:0051347	BP	positive regulation of transferase activity	2/330	29/27940	0.0457963	1	gene_Solyc02g066980.1;gene_Solyc06g043150.4	Solyc02g066980.1;Solyc06g043150.4
1	GO:0007349	BP	cellularization	1/330	4/27940	0.0464161	1	gene_Solyc03g096890.3	Solyc03g096890.3
1	GO:0071163	BP	DNA replication preinitiation complex assembly	1/330	4/27940	0.0464161	1	gene_Solyc06g008510.3	Solyc06g008510.3
1	GO:0033387	BP	putrescine biosynthetic process from ornithine	1/330	4/27940	0.0464161	1	gene_Solyc04g082030.1	Solyc04g082030.1
1	GO:0007112	BP	male meiosis cytokinesis	1/330	4/27940	0.0464161	1	gene_Solyc03g096890.3	Solyc03g096890.3
1	GO:0051938	BP	L-glutamate import	1/330	4/27940	0.0464161	1	gene_Solyc02g070280.3	Solyc02g070280.3
1	GO:2000033	BP	regulation of seed dormancy process	1/330	4/27940	0.0464161	1	gene_Solyc10g086380.1	Solyc10g086380.1
1	GO:0032465	BP	regulation of cytokinesis	1/330	4/27940	0.0464161	1	gene_Solyc12g095870.3	Solyc12g095870.3
1	GO:0015800	BP	acidic amino acid transport	1/330	4/27940	0.0464161	1	gene_Solyc02g070280.3	Solyc02g070280.3
1	GO:0048825	BP	cotyledon development	1/330	4/27940	0.0464161	1	gene_Solyc11g006230.3	Solyc11g006230.3
1	GO:0009938	BP	negative regulation of gibberellic acid mediated signaling pathway	1/330	4/27940	0.0464161	1	gene_Solyc10g086380.1	Solyc10g086380.1
1	GO:1905156	BP	negative regulation of photosynthesis	1/330	4/27940	0.0464161	1	gene_Solyc03g116730.5	Solyc03g116730.5
1	GO:0051383	BP	kinetochore organization	1/330	4/27940	0.0464161	1	gene_Solyc03g111790.4	Solyc03g111790.4
1	GO:0033206	BP	meiotic cytokinesis	1/330	4/27940	0.0464161	1	gene_Solyc03g096890.3	Solyc03g096890.3
3	GO:0000323	CC	lytic vacuole	3/330	56/27940	0.0285679	1	gene_Solyc02g077040.4;gene_Solyc07g041920.5;gene_Solyc02g069110.5	Solyc02g077040.4;Solyc07g041920.5;Solyc02g069110.5
261	GO:0005575	CC	cellular_component	261/330	20652/27940	0.0319144	1	gene_Solyc11g017270.2;gene_Solyc12g006840.2;gene_Solyc05g007890.5;gene_Solyc10g006150.4;gene_Solyc01g104770.4;gene_Solyc02g069110.5;gene_Solyc03g116950.2;gene_Solyc10g078370.2;gene_Solyc10g047150.3;gene_Solyc01g086800.4;gene_Solyc08g077360.3;gene_Solyc11g018772.1;gene_Solyc04g077540.4;gene_Solyc08g067610.3;gene_Solyc03g111790.4;gene_Solyc12g006860.2;gene_Solyc12g042250.3;gene_Solyc07g006420.1;gen…	Solyc11g017270.2;Solyc12g006840.2;Solyc05g007890.5;Solyc10g006150.4;Solyc01g104770.4;Solyc02g069110.5;Solyc03g116950.2;Solyc10g078370.2;Solyc10g047150.3;Solyc01g086800.4;Solyc08g077360.3;Solyc11g018772.1;Solyc04g077540.4;Solyc08g067610.3;Solyc03g111790.4;Solyc12g006860.2;Solyc12g042250.3;Solyc07g006420.1;Solyc01g103960.3;Solyc01g106500.4;Solyc08g075150.3;Solyc05g010420.2;Solyc02g080040.4;Solyc11g…
2	GO:0005881	CC	cytoplasmic microtubule	2/330	25/27940	0.0348937	1	gene_Solyc02g092950.3;gene_Solyc01g080750.3	Solyc02g092950.3;Solyc01g080750.3
2	GO:0009524	CC	phragmoplast	2/330	25/27940	0.0348937	1	gene_Solyc02g092950.3;gene_Solyc03g096890.3	Solyc02g092950.3;Solyc03g096890.3
1	GO:0044853	CC	plasma membrane raft	1/330	3/27940	0.0350175	1	gene_Solyc03g005420.2	Solyc03g005420.2
1	GO:0032133	CC	chromosome passenger complex	1/330	3/27940	0.0350175	1	gene_Solyc12g095870.3	Solyc12g095870.3
1	GO:0045121	CC	membrane raft	1/330	3/27940	0.0350175	1	gene_Solyc03g005420.2	Solyc03g005420.2
1	GO:0005901	CC	caveola	1/330	3/27940	0.0350175	1	gene_Solyc03g005420.2	Solyc03g005420.2
1	GO:0098857	CC	membrane microdomain	1/330	3/27940	0.0350175	1	gene_Solyc03g005420.2	Solyc03g005420.2
1	GO:0000940	CC	outer kinetochore	1/330	3/27940	0.0350175	1	gene_Solyc05g050900.4	Solyc05g050900.4
1	GO:0030891	CC	VCB complex	1/330	3/27940	0.0350175	1	gene_Solyc12g089220.3	Solyc12g089220.3
17	GO:0005576	CC	extracellular region	17/330	863/27940	0.0364846	1	gene_Solyc02g080200.5;gene_Solyc11g066130.1;gene_Solyc01g088300.3;gene_Solyc09g084480.3;gene_Solyc01g150176.2;gene_Solyc06g068880.3;gene_Solyc02g082930.3;gene_Solyc08g080620.1;gene_Solyc09g084470.3;gene_Solyc09g083435.1;gene_Solyc10g079860.2;gene_Solyc11g018772.1;gene_Solyc04g071900.5;gene_Solyc01g105070.3;gene_Solyc07g006560.3;gene_Solyc09g084460.3;gene_Solyc04g008210.2	Solyc02g080200.5;Solyc11g066130.1;Solyc01g088300.3;Solyc09g084480.3;Solyc01g150176.2;Solyc06g068880.3;Solyc02g082930.3;Solyc08g080620.1;Solyc09g084470.3;Solyc09g083435.1;Solyc10g079860.2;Solyc11g018772.1;Solyc04g071900.5;Solyc01g105070.3;Solyc07g006560.3;Solyc09g084460.3;Solyc04g008210.2
7	GO:0048029	MF	monosaccharide binding	7/330	244/27940	0.0264824	1	gene_Solyc03g080190.3;gene_Solyc11g065220.2;gene_Solyc12g005940.2;gene_Solyc06g083910.3;gene_Solyc02g071470.5;gene_Solyc03g006880.3;gene_Solyc09g010020.2	Solyc03g080190.3;Solyc11g065220.2;Solyc12g005940.2;Solyc06g083910.3;Solyc02g071470.5;Solyc03g006880.3;Solyc09g010020.2
54	GO:0005515	MF	protein binding	54/330	3425/27940	0.0277016	1	gene_Solyc12g044320.2;gene_Solyc01g057320.3;gene_Solyc08g078470.4;gene_Solyc03g096890.3;gene_Solyc08g083240.3;gene_Solyc01g009340.5;gene_Solyc04g007210.3;gene_Solyc01g006950.3;gene_Solyc01g086800.4;gene_Solyc08g077360.3;gene_Solyc05g006750.3;gene_Solyc04g077540.4;gene_Solyc05g007760.2;gene_Solyc12g098630.2;gene_Solyc05g013530.4;gene_Solyc10g086340.1;gene_Solyc05g009310.3;gene_Solyc01g009700.3;gen…	Solyc12g044320.2;Solyc01g057320.3;Solyc08g078470.4;Solyc03g096890.3;Solyc08g083240.3;Solyc01g009340.5;Solyc04g007210.3;Solyc01g006950.3;Solyc01g086800.4;Solyc08g077360.3;Solyc05g006750.3;Solyc04g077540.4;Solyc05g007760.2;Solyc12g098630.2;Solyc05g013530.4;Solyc10g086340.1;Solyc05g009310.3;Solyc01g009700.3;Solyc08g066350.2;Solyc01g073970.3;Solyc09g007360.3;Solyc01g080750.3;Solyc06g008510.3;Solyc07g…
4	GO:0004197	MF	cysteine-type endopeptidase activity	4/330	97/27940	0.0281182	1	gene_Solyc02g077040.4;gene_Solyc07g041920.5;gene_Solyc08g065610.3;gene_Solyc02g069110.5	Solyc02g077040.4;Solyc07g041920.5;Solyc08g065610.3;Solyc02g069110.5
31	GO:0005215	MF	transporter activity	31/330	1764/27940	0.0294312	1	gene_Solyc07g032490.3;gene_Solyc09g091660.3;gene_Solyc10g078370.2;gene_Solyc02g071100.3;gene_Solyc02g079330.3;gene_Solyc08g067610.3;gene_Solyc05g050380.4;gene_Solyc08g077370.4;gene_Solyc02g085170.4;gene_Solyc12g042250.3;gene_Solyc11g006710.2;gene_Solyc02g070280.3;gene_Solyc06g054270.3;gene_Solyc02g079350.3;gene_Solyc03g097600.4;gene_Solyc05g160250.1;gene_Solyc10g076480.2;gene_Solyc02g032660.3;gen…	Solyc07g032490.3;Solyc09g091660.3;Solyc10g078370.2;Solyc02g071100.3;Solyc02g079330.3;Solyc08g067610.3;Solyc05g050380.4;Solyc08g077370.4;Solyc02g085170.4;Solyc12g042250.3;Solyc11g006710.2;Solyc02g070280.3;Solyc06g054270.3;Solyc02g079350.3;Solyc03g097600.4;Solyc05g160250.1;Solyc10g076480.2;Solyc02g032660.3;Solyc04g074880.2;Solyc07g008440.3;Solyc01g087070.4;Solyc05g050350.2;Solyc10g049640.2;Solyc06g…
2	GO:0016638	MF	oxidoreductase activity, acting on the CH-NH2 group of donors	2/330	25/27940	0.0348937	1	gene_Solyc03g083440.4;gene_Solyc09g075920.1	Solyc03g083440.4;Solyc09g075920.1
2	GO:0004869	MF	cysteine-type endopeptidase inhibitor activity	2/330	25/27940	0.0348937	1	gene_Solyc03g098700.1;gene_Solyc04g014800.3	Solyc03g098700.1;Solyc04g014800.3
1	GO:0004350	MF	glutamate-5-semialdehyde dehydrogenase activity	1/330	3/27940	0.0350175	1	gene_Solyc06g019170.3	Solyc06g019170.3
1	GO:0106286	MF	(E)-caffeate-CoA ligase activity	1/330	3/27940	0.0350175	1	gene_Solyc03g117870.3	Solyc03g117870.3
1	GO:0098809	MF	nitrite reductase activity	1/330	3/27940	0.0350175	1	gene_Solyc10g050890.2	Solyc10g050890.2
1	GO:0035174	MF	histone serine kinase activity	1/330	3/27940	0.0350175	1	gene_Solyc12g095870.3	Solyc12g095870.3
1	GO:0050563	MF	trans-feruloyl-CoA synthase activity	1/330	3/27940	0.0350175	1	gene_Solyc03g117870.3	Solyc03g117870.3
1	GO:0018858	MF	benzoate-CoA ligase activity	1/330	3/27940	0.0350175	1	gene_Solyc03g117870.3	Solyc03g117870.3
69	GO:1901265	MF	nucleoside phosphate binding	69/330	4599/27940	0.0361351	1	gene_Solyc01g057320.3;gene_Solyc12g006840.2;gene_Solyc07g009443.1;gene_Solyc08g066320.4;gene_Solyc03g096890.3;gene_Solyc09g009200.3;gene_Solyc01g104770.4;gene_Solyc03g082430.1;gene_Solyc06g048740.4;gene_Solyc10g086340.1;gene_Solyc03g120110.3;gene_Solyc02g150128.1;gene_Solyc08g077360.3;gene_Solyc07g045160.3;gene_Solyc04g077540.4;gene_Solyc08g067610.3;gene_Solyc03g078360.1;gene_Solyc04g074030.3;gen…	Solyc01g057320.3;Solyc12g006840.2;Solyc07g009443.1;Solyc08g066320.4;Solyc03g096890.3;Solyc09g009200.3;Solyc01g104770.4;Solyc03g082430.1;Solyc06g048740.4;Solyc10g086340.1;Solyc03g120110.3;Solyc02g150128.1;Solyc08g077360.3;Solyc07g045160.3;Solyc04g077540.4;Solyc08g067610.3;Solyc03g078360.1;Solyc04g074030.3;Solyc01g103960.3;Solyc01g106500.4;Solyc09g091660.3;Solyc04g077310.4;Solyc09g082890.3;Solyc01g…
69	GO:0000166	MF	nucleotide binding	69/330	4599/27940	0.0361351	1	gene_Solyc01g057320.3;gene_Solyc12g006840.2;gene_Solyc07g009443.1;gene_Solyc08g066320.4;gene_Solyc03g096890.3;gene_Solyc09g009200.3;gene_Solyc01g104770.4;gene_Solyc03g082430.1;gene_Solyc06g048740.4;gene_Solyc10g086340.1;gene_Solyc03g120110.3;gene_Solyc02g150128.1;gene_Solyc08g077360.3;gene_Solyc07g045160.3;gene_Solyc04g077540.4;gene_Solyc08g067610.3;gene_Solyc03g078360.1;gene_Solyc04g074030.3;gen…	Solyc01g057320.3;Solyc12g006840.2;Solyc07g009443.1;Solyc08g066320.4;Solyc03g096890.3;Solyc09g009200.3;Solyc01g104770.4;Solyc03g082430.1;Solyc06g048740.4;Solyc10g086340.1;Solyc03g120110.3;Solyc02g150128.1;Solyc08g077360.3;Solyc07g045160.3;Solyc04g077540.4;Solyc08g067610.3;Solyc03g078360.1;Solyc04g074030.3;Solyc01g103960.3;Solyc01g106500.4;Solyc09g091660.3;Solyc04g077310.4;Solyc09g082890.3;Solyc01g…
75	GO:0036094	MF	small molecule binding	75/330	5073/27940	0.0368796	1	gene_Solyc01g057320.3;gene_Solyc12g006840.2;gene_Solyc07g009443.1;gene_Solyc08g066320.4;gene_Solyc03g096890.3;gene_Solyc09g009200.3;gene_Solyc01g104770.4;gene_Solyc03g082430.1;gene_Solyc06g048740.4;gene_Solyc10g086340.1;gene_Solyc03g120110.3;gene_Solyc02g150128.1;gene_Solyc08g077360.3;gene_Solyc07g045160.3;gene_Solyc02g071470.5;gene_Solyc04g077540.4;gene_Solyc08g067610.3;gene_Solyc03g078360.1;gen…	Solyc01g057320.3;Solyc12g006840.2;Solyc07g009443.1;Solyc08g066320.4;Solyc03g096890.3;Solyc09g009200.3;Solyc01g104770.4;Solyc03g082430.1;Solyc06g048740.4;Solyc10g086340.1;Solyc03g120110.3;Solyc02g150128.1;Solyc08g077360.3;Solyc07g045160.3;Solyc02g071470.5;Solyc04g077540.4;Solyc08g067610.3;Solyc03g078360.1;Solyc04g074030.3;Solyc01g103960.3;Solyc01g106500.4;Solyc09g091660.3;Solyc04g077310.4;Solyc09g…
5	GO:0005516	MF	calmodulin binding	5/330	162/27940	0.0436603	1	gene_Solyc12g036390.2;gene_Solyc03g095650.3;gene_Solyc08g083240.3;gene_Solyc01g009340.5;gene_Solyc06g010030.4	Solyc12g036390.2;Solyc03g095650.3;Solyc08g083240.3;Solyc01g009340.5;Solyc06g010030.4
1	GO:0008934	MF	inositol monophosphate 1-phosphatase activity	1/330	4/27940	0.0464161	1	gene_Solyc04g014800.3	Solyc04g014800.3
1	GO:0016793	MF	triphosphoric monoester hydrolase activity	1/330	4/27940	0.0464161	1	gene_Solyc01g109110.3	Solyc01g109110.3
1	GO:0052832	MF	inositol monophosphate 3-phosphatase activity	1/330	4/27940	0.0464161	1	gene_Solyc04g014800.3	Solyc04g014800.3
1	GO:0035173	MF	histone kinase activity	1/330	4/27940	0.0464161	1	gene_Solyc12g095870.3	Solyc12g095870.3
1	GO:0052834	MF	inositol monophosphate phosphatase activity	1/330	4/27940	0.0464161	1	gene_Solyc04g014800.3	Solyc04g014800.3
1	GO:0052833	MF	inositol monophosphate 4-phosphatase activity	1/330	4/27940	0.0464161	1	gene_Solyc04g014800.3	Solyc04g014800.3
1	GO:0004586	MF	ornithine decarboxylase activity	1/330	4/27940	0.0464161	1	gene_Solyc04g082030.1	Solyc04g082030.1
1	GO:0004512	MF	inositol-3-phosphate synthase activity	1/330	4/27940	0.0464161	1	gene_Solyc04g050860.4	Solyc04g050860.4
1	GO:0003984	MF	acetolactate synthase activity	1/330	4/27940	0.0464161	1	gene_Solyc03g044330.1	Solyc03g044330.1
1	GO:0106290	MF	trans-cinnamate-CoA ligase activity	1/330	4/27940	0.0464161	1	gene_Solyc03g117870.3	Solyc03g117870.3
1	GO:0008832	MF	dGTPase activity	1/330	4/27940	0.0464161	1	gene_Solyc01g109110.3	Solyc01g109110.3
