# Supplementary material for: Physiological and molecular response mechanisms of tomato seedlings to cadmium (Cd) and lead (Pb) stress
Source: PeerJ. 2024 Nov 29;12:e18533. doi: 10.7717/peerj.18533 (PMC11610467; doi:10.7717/peerj.18533)
Supplement: Supplemental Information 11 [file peerj-12-18533-s011.xlsx]

## Sheet: 453 DEGs
Supplementary Dataset 3. KEGG pathway analysis of DEGs in leaves of Cd- and Pb- stressed tomato seedlings
Num	Pathway id	Description	Database	Ratio_in_study	Ratio_in_pop	Pvalue	Padjust	First Category	Second Category	Gene_ids	Gene_names
5	map00360	Phenylalanine metabolism	KEGG PATHWAY	5/180	73/12930	0.0034602	0.107266	Metabolism	Amino acid metabolism	gene_Solyc08g068600.3|gene_Solyc10g011925.2|gene_Solyc08g068610.3|gene_Solyc08g068680.4|gene_Solyc09g007900.5	Solyc08g068600.3;Solyc10g011925.2;Solyc08g068610.3;Solyc08g068680.4;Solyc09g007900.5
4	map00904	Diterpenoid biosynthesis	KEGG PATHWAY	4/180	53/12930	0.00625444	0.129259	Metabolism	Metabolism of terpenoids and polyketides	gene_Solyc09g059240.3|gene_Solyc10g007570.4|gene_Solyc02g070430.4|gene_Solyc03g006550.4	Solyc09g059240.3;Solyc10g007570.4;Solyc02g070430.4;Solyc03g006550.4
3	map00196	Photosynthesis - antenna proteins	KEGG PATHWAY	3/180	31/12930	0.00895691	0.138832	Metabolism	Energy metabolism	gene_Solyc12g011450.2|gene_Solyc03g115900.5|gene_Solyc01g105030.3	Solyc12g011450.2;Solyc03g115900.5;Solyc01g105030.3
7	map00480	Glutathione metabolism	KEGG PATHWAY	7/180	132/12930	0.00246811	0.153023	Metabolism	Metabolism of other amino acids	gene_Solyc12g010020.3|gene_Solyc08g068800.4|gene_Solyc05g006730.5|gene_Solyc03g007240.3|gene_Solyc05g006750.3|gene_Solyc09g011630.3|gene_Solyc08g006150.3	Solyc12g010020.3;Solyc08g068800.4;Solyc05g006730.5;Solyc03g007240.3;Solyc05g006750.3;Solyc09g011630.3;Solyc08g006150.3
2	map00902	Monoterpenoid biosynthesis	KEGG PATHWAY	2/180	17/12930	0.0228506	0.157415	Metabolism	Metabolism of terpenoids and polyketides	gene_Solyc01g094240.3|gene_Solyc01g094260.4	Solyc01g094240.3;Solyc01g094260.4
4	map00052	Galactose metabolism	KEGG PATHWAY	4/180	65/12930	0.0127191	0.157716	Metabolism	Carbohydrate metabolism	gene_Solyc02g087770.3|gene_Solyc02g087810.3|gene_Solyc02g087800.3|gene_Solyc02g087780.3	Solyc02g087770.3;Solyc02g087810.3;Solyc02g087800.3;Solyc02g087780.3
8	map00940	Phenylpropanoid biosynthesis	KEGG PATHWAY	8/180	243/12930	0.0204914	0.158808	Metabolism	Biosynthesis of other secondary metabolites	gene_Solyc02g093230.4|gene_Solyc10g011925.2|gene_Solyc02g093250.3|gene_Solyc04g071890.4|gene_Solyc03g080180.5|gene_Solyc09g007900.5|gene_Solyc09g072700.4|gene_Solyc11g018774.2	Solyc02g093230.4;Solyc10g011925.2;Solyc02g093250.3;Solyc04g071890.4;Solyc03g080180.5;Solyc09g007900.5;Solyc09g072700.4;Solyc11g018774.2
4	map00330	Arginine and proline metabolism	KEGG PATHWAY	4/180	74/12930	0.0196419	0.173971	Metabolism	Amino acid metabolism	gene_Solyc01g091170.3|gene_Solyc02g086970.4|gene_Solyc03g007240.3|gene_Solyc02g089630.3	Solyc01g091170.3;Solyc02g086970.4;Solyc03g007240.3;Solyc02g089630.3
3	map00220	Arginine biosynthesis	KEGG PATHWAY	3/180	41/12930	0.0192009	0.198409	Metabolism	Amino acid metabolism	gene_Solyc08g076980.4|gene_Solyc08g076970.3|gene_Solyc01g091170.3	Solyc08g076980.4;Solyc08g076970.3;Solyc01g091170.3
4	map00941	Flavonoid biosynthesis	KEGG PATHWAY	4/180	88/12930	0.0343267	0.212825	Metabolism	Biosynthesis of other secondary metabolites	gene_Solyc02g093230.4|gene_Solyc02g093250.3|gene_Solyc03g115220.5|gene_Solyc11g013110.2	Solyc02g093230.4;Solyc02g093250.3;Solyc03g115220.5;Solyc11g013110.2
1	map00944	Flavone and flavonol biosynthesis	KEGG PATHWAY	1/180	3/12930	0.0411878	0.232149	Metabolism	Biosynthesis of other secondary metabolites	gene_Solyc03g115220.5	Solyc03g115220.5
6	map00195	Photosynthesis	KEGG PATHWAY	6/180	204/12930	0.065743	0.339672	Metabolism	Energy metabolism	gene_Solyc00g500021.1|gene_Solyc00g500068.1|gene_Solyc06g009940.1|gene_Solyc02g020960.3|gene_Solyc10g075160.1|gene_Solyc01g103920.3	Solyc00g500021.1;Solyc00g500068.1;Solyc06g009940.1;Solyc02g020960.3;Solyc10g075160.1;Solyc01g103920.3
3	map00592	alpha-Linolenic acid metabolism	KEGG PATHWAY	3/180	75/12930	0.0867532	0.384193	Metabolism	Lipid metabolism	gene_Solyc12g011037.2|gene_Solyc07g019670.4|gene_Solyc01g103390.3	Solyc12g011037.2;Solyc07g019670.4;Solyc01g103390.3
5	map00010	Glycolysis / Gluconeogenesis	KEGG PATHWAY	5/180	165/12930	0.0807237	0.38499	Metabolism	Carbohydrate metabolism	gene_Solyc02g086970.4|gene_Solyc02g087770.3|gene_Solyc02g087810.3|gene_Solyc02g087800.3|gene_Solyc02g087780.3	Solyc02g086970.4;Solyc02g087770.3;Solyc02g087810.3;Solyc02g087800.3;Solyc02g087780.3
2	map00906	Carotenoid biosynthesis	KEGG PATHWAY	2/180	39/12930	0.102241	0.422595	Metabolism	Metabolism of terpenoids and polyketides	gene_Solyc11g071600.2|gene_Solyc08g075490.5	Solyc11g071600.2;Solyc08g075490.5
3	map00630	Glyoxylate and dicarboxylate metabolism	KEGG PATHWAY	3/180	92/12930	0.136719	0.529787	Metabolism	Carbohydrate metabolism	gene_Solyc02g085933.1|gene_Solyc03g115990.3|gene_Solyc06g035960.3	Solyc02g085933.1;Solyc03g115990.3;Solyc06g035960.3
1	map00903	Limonene and pinene degradation	KEGG PATHWAY	1/180	15/12930	0.189739	0.653545	Metabolism	Metabolism of terpenoids and polyketides	gene_Solyc02g086970.4	Solyc02g086970.4
8	map04075	Plant hormone signal transduction	KEGG PATHWAY	8/180	393/12930	0.182682	0.666252	Environmental Information Processing	Signal transduction	gene_Solyc01g005440.4|gene_Solyc01g006650.2|gene_Solyc03g006930.3|gene_Solyc11g011030.2|gene_Solyc08g066350.2|gene_Solyc12g049400.2|gene_Solyc02g071220.3|gene_Solyc11g069093.1	Solyc01g005440.4;Solyc01g006650.2;Solyc03g006930.3;Solyc11g011030.2;Solyc08g066350.2;Solyc12g049400.2;Solyc02g071220.3;Solyc11g069093.1
1	map00770	Pantothenate and CoA biosynthesis	KEGG PATHWAY	1/180	51/12930	0.511473	0.737473	Metabolism	Metabolism of cofactors and vitamins	gene_Solyc02g086970.4	Solyc02g086970.4
2	map00561	Glycerolipid metabolism	KEGG PATHWAY	2/180	90/12930	0.357335	0.738492	Metabolism	Lipid metabolism	gene_Solyc02g086970.4|gene_Solyc03g098020.4	Solyc02g086970.4;Solyc03g098020.4
1	map00563	Glycosylphosphatidylinositol (GPI)-anchor biosynthesis	KEGG PATHWAY	1/180	29/12930	0.334351	0.740348	Metabolism	Glycan biosynthesis and metabolism	gene_Solyc12g042530.2	Solyc12g042530.2
5	map04016	MAPK signaling pathway - plant	KEGG PATHWAY	5/180	296/12930	0.395118	0.742343	Environmental Information Processing	Signal transduction	gene_Solyc09g014990.4|gene_Solyc01g006650.2|gene_Solyc03g006930.3|gene_Solyc06g005170.3|gene_Solyc06g006010.4	Solyc09g014990.4;Solyc01g006650.2;Solyc03g006930.3;Solyc06g005170.3;Solyc06g006010.4
1	map00950	Isoquinoline alkaloid biosynthesis	KEGG PATHWAY	1/180	31/12930	0.352797	0.754255	Metabolism	Biosynthesis of other secondary metabolites	gene_Solyc02g078650.4	Solyc02g078650.4
1	map00310	Lysine degradation	KEGG PATHWAY	1/180	46/12930	0.475863	0.756501	Metabolism	Amino acid metabolism	gene_Solyc02g086970.4	Solyc02g086970.4
1	map00860	Porphyrin metabolism	KEGG PATHWAY	1/180	55/12930	0.53822	0.758401	Metabolism	Metabolism of cofactors and vitamins	gene_Solyc09g065620.3	Solyc09g065620.3
2	map00562	Inositol phosphate metabolism	KEGG PATHWAY	2/180	97/12930	0.392211	0.759909	Metabolism	Carbohydrate metabolism	gene_Solyc03g097410.1|gene_Solyc04g054740.3	Solyc03g097410.1;Solyc04g054740.3
1	map04712	Circadian rhythm - plant	KEGG PATHWAY	1/180	48/12930	0.490407	0.760131	Organismal Systems	Environmental adaptation	gene_Solyc10g005080.3	Solyc10g005080.3
5	map04626	Plant-pathogen interaction	KEGG PATHWAY	5/180	304/12930	0.417209	0.760792	Organismal Systems	Environmental adaptation	gene_Solyc09g014990.4|gene_Solyc02g086990.4|gene_Solyc05g052050.1|gene_Solyc06g005170.3|gene_Solyc06g006010.4	Solyc09g014990.4;Solyc02g086990.4;Solyc05g052050.1;Solyc06g005170.3;Solyc06g006010.4
7	map00190	Oxidative phosphorylation	KEGG PATHWAY	7/180	404/12930	0.332136	0.762682	Metabolism	Energy metabolism	gene_Solyc00g500260.1|gene_Solyc00g500325.1|gene_Solyc00g500039.1|gene_Solyc00g500044.1|gene_Solyc00g500301.1|gene_Solyc00g500083.1|gene_Solyc00g500345.1	Solyc00g500260.1;Solyc00g500325.1;Solyc00g500039.1;Solyc00g500044.1;Solyc00g500301.1;Solyc00g500083.1;Solyc00g500345.1
1	map00960	Tropane, piperidine and pyridine alkaloid biosynthesis	KEGG PATHWAY	1/180	50/12930	0.504549	0.762977	Metabolism	Biosynthesis of other secondary metabolites	gene_Solyc06g083470.5	Solyc06g083470.5
1	map00460	Cyanoamino acid metabolism	KEGG PATHWAY	1/180	50/12930	0.504549	0.762977	Metabolism	Metabolism of other amino acids	gene_Solyc02g080290.3	Solyc02g080290.3
1	map00450	Selenocompound metabolism	KEGG PATHWAY	1/180	19/12930	0.23398	0.763512	Metabolism	Metabolism of other amino acids	gene_Solyc08g083110.4	Solyc08g083110.4
2	map02010	ABC transporters	KEGG PATHWAY	2/180	113/12930	0.468449	0.764311	Environmental Information Processing	Membrane transport	gene_Solyc02g087410.4|gene_Solyc06g076930.2	Solyc02g087410.4;Solyc06g076930.2
2	map00710	Carbon fixation in photosynthetic organisms	KEGG PATHWAY	2/180	95/12930	0.382328	0.764656	Metabolism	Energy metabolism	gene_Solyc02g085933.1|gene_Solyc03g115990.3	Solyc02g085933.1;Solyc03g115990.3
3	map00270	Cysteine and methionine metabolism	KEGG PATHWAY	3/180	130/12930	0.271345	0.764699	Metabolism	Amino acid metabolism	gene_Solyc03g115990.3|gene_Solyc03g007240.3|gene_Solyc08g083110.4	Solyc03g115990.3;Solyc03g007240.3;Solyc08g083110.4
2	map00945	Stilbenoid, diarylheptanoid and gingerol biosynthesis	KEGG PATHWAY	2/180	71/12930	0.25991	0.767354	Metabolism	Biosynthesis of other secondary metabolites	gene_Solyc02g093230.4|gene_Solyc02g093250.3	Solyc02g093230.4;Solyc02g093250.3
4	map00500	Starch and sucrose metabolism	KEGG PATHWAY	4/180	182/12930	0.248186	0.769378	Metabolism	Carbohydrate metabolism	gene_Solyc02g080290.3|gene_Solyc01g109790.3|gene_Solyc08g083320.4|gene_Solyc04g082090.3	Solyc02g080290.3;Solyc01g109790.3;Solyc08g083320.4;Solyc04g082090.3
2	map00564	Glycerophospholipid metabolism	KEGG PATHWAY	2/180	111/12930	0.459221	0.769506	Metabolism	Lipid metabolism	gene_Solyc12g042890.2|gene_Solyc08g067160.3	Solyc12g042890.2;Solyc08g067160.3
1	map00061	Fatty acid biosynthesis	KEGG PATHWAY	1/180	69/12930	0.62087	0.769879	Metabolism	Lipid metabolism	gene_Solyc12g096780.2	Solyc12g096780.2
1	map00350	Tyrosine metabolism	KEGG PATHWAY	1/180	67/12930	0.610032	0.771877	Metabolism	Amino acid metabolism	gene_Solyc02g078650.4	Solyc02g078650.4
1	map00062	Fatty acid elongation	KEGG PATHWAY	1/180	41/12930	0.437674	0.775308	Metabolism	Lipid metabolism	gene_Solyc12g096780.2	Solyc12g096780.2
1	map00260	Glycine, serine and threonine metabolism	KEGG PATHWAY	1/180	75/12930	0.65162	0.776931	Metabolism	Amino acid metabolism	gene_Solyc04g009960.3	Solyc04g009960.3
1	map03410	Base excision repair	KEGG PATHWAY	1/180	43/12930	0.453271	0.780633	Genetic Information Processing	Replication and repair	gene_Solyc09g083007.1	Solyc09g083007.1
1	map00999	Biosynthesis of various plant secondary metabolites	KEGG PATHWAY	1/180	66/12930	0.604498	0.78081	Metabolism	Biosynthesis of other secondary metabolites	gene_Solyc02g080290.3	Solyc02g080290.3
1	map00020	Citrate cycle (TCA cycle)	KEGG PATHWAY	1/180	64/12930	0.593194	0.782512	Metabolism	Carbohydrate metabolism	gene_Solyc03g115990.3	Solyc03g115990.3
2	map00620	Pyruvate metabolism	KEGG PATHWAY	2/180	140/12930	0.583271	0.786148	Metabolism	Carbohydrate metabolism	gene_Solyc02g086970.4|gene_Solyc03g115990.3	Solyc02g086970.4;Solyc03g115990.3
1	map00410	beta-Alanine metabolism	KEGG PATHWAY	1/180	74/12930	0.646673	0.786151	Metabolism	Metabolism of other amino acids	gene_Solyc02g086970.4	Solyc02g086970.4
1	map00340	Histidine metabolism	KEGG PATHWAY	1/180	26/12930	0.305697	0.789718	Metabolism	Amino acid metabolism	gene_Solyc02g086970.4	Solyc02g086970.4
1	map00591	Linoleic acid metabolism	KEGG PATHWAY	1/180	26/12930	0.305697	0.789718	Metabolism	Lipid metabolism	gene_Solyc12g011037.2	Solyc12g011037.2
2	map00380	Tryptophan metabolism	KEGG PATHWAY	2/180	85/12930	0.331992	0.791673	Metabolism	Amino acid metabolism	gene_Solyc02g086970.4|gene_Solyc03g080180.5	Solyc02g086970.4;Solyc03g080180.5
1	map00053	Ascorbate and aldarate metabolism	KEGG PATHWAY	1/180	81/12930	0.679888	0.795341	Metabolism	Carbohydrate metabolism	gene_Solyc02g086970.4	Solyc02g086970.4
1	map00280	Valine, leucine and isoleucine degradation	KEGG PATHWAY	1/180	87/12930	0.705875	0.795713	Metabolism	Amino acid metabolism	gene_Solyc02g086970.4	Solyc02g086970.4
2	map00071	Fatty acid degradation	KEGG PATHWAY	2/180	78/12930	0.296081	0.79813	Metabolism	Lipid metabolism	gene_Solyc02g086970.4|gene_Solyc07g019670.4	Solyc02g086970.4;Solyc07g019670.4
1	map03008	Ribosome biogenesis in eukaryotes	KEGG PATHWAY	1/180	91/12930	0.722022	0.799382	Genetic Information Processing	Translation	gene_Solyc05g055880.4	Solyc05g055880.4
1	map00240	Pyrimidine metabolism	KEGG PATHWAY	1/180	85/12930	0.697454	0.800781	Metabolism	Nucleotide metabolism	gene_Solyc06g083130.5	Solyc06g083130.5
1	map00900	Terpenoid backbone biosynthesis	KEGG PATHWAY	1/180	62/12930	0.581569	0.801274	Metabolism	Metabolism of terpenoids and polyketides	gene_Solyc10g085140.2	Solyc10g085140.2
1	map04070	Phosphatidylinositol signaling system	KEGG PATHWAY	1/180	95/12930	0.737288	0.801962	Environmental Information Processing	Signal transduction	gene_Solyc03g097410.1	Solyc03g097410.1
3	map04141	Protein processing in endoplasmic reticulum	KEGG PATHWAY	3/180	287/12930	0.766539	0.819404	Genetic Information Processing	Folding, sorting and degradation	gene_Solyc10g086680.1|gene_Solyc04g014480.3|gene_Solyc06g076560.2	Solyc10g086680.1;Solyc04g014480.3;Solyc06g076560.2
1	map03018	RNA degradation	KEGG PATHWAY	1/180	146/12930	0.872343	0.916699	Genetic Information Processing	Folding, sorting and degradation	gene_Solyc06g074030.1	Solyc06g074030.1
1	map00908	Zeatin biosynthesis	KEGG PATHWAY	1/180	177/12930	0.917793	0.948386	Metabolism	Metabolism of terpenoids and polyketides	gene_Solyc10g085890.1	Solyc10g085890.1
1	map00520	Amino sugar and nucleotide sugar metabolism	KEGG PATHWAY	1/180	204/12930	0.944017	0.959493	Metabolism	Carbohydrate metabolism	gene_Solyc01g109790.3	Solyc01g109790.3
3	map03010	Ribosome	KEGG PATHWAY	3/180	480/12930	0.965691	0.965691	Genetic Information Processing	Translation	gene_Solyc00g500055.1|gene_Solyc00g500137.1|gene_Solyc00g500207.1	Solyc00g500055.1;Solyc00g500137.1;Solyc00g500207.1

## Sheet: 381 DEGs
Supplementary Dataset 3. KEGG pathway analysis of DEGs in leaves of Cd- and Pb- stressed tomato seedlings
Num	Pathway id	Description	Database	Ratio_in_study	Ratio_in_pop	Pvalue	Padjust	First Category	Second Category	Gene_ids	Gene_names
6	map00330	Arginine and proline metabolism	KEGG PATHWAY	6/133	74/12930	0.000110483	0.00629756	Metabolism	Amino acid metabolism	gene_Solyc06g019170.3|gene_Solyc05g010420.2|gene_Solyc04g082030.1|gene_Solyc02g086970.4|gene_Solyc03g007240.3|gene_Solyc02g089630.3	Solyc06g019170.3;Solyc05g010420.2;Solyc04g082030.1;Solyc02g086970.4;Solyc03g007240.3;Solyc02g089630.3
3	map00910	Nitrogen metabolism	KEGG PATHWAY	3/133	36/12930	0.0059291	0.168979	Metabolism	Energy metabolism	gene_Solyc03g083440.4|gene_Solyc10g050890.2|gene_Solyc11g069640.2	Solyc03g083440.4;Solyc10g050890.2;Solyc11g069640.2
4	map00480	Glutathione metabolism	KEGG PATHWAY	4/133	132/12930	0.0472665	0.384884	Metabolism	Metabolism of other amino acids	gene_Solyc04g082030.1|gene_Solyc12g010030.3|gene_Solyc03g007240.3|gene_Solyc05g006750.3	Solyc04g082030.1;Solyc12g010030.3;Solyc03g007240.3;Solyc05g006750.3
1	map00524	Neomycin, kanamycin and gentamicin biosynthesis	KEGG PATHWAY	1/133	6/12930	0.0601628	0.42866	Metabolism	Biosynthesis of other secondary metabolites	gene_Solyc11g065220.2	Solyc11g065220.2
4	map00270	Cysteine and methionine metabolism	KEGG PATHWAY	4/133	130/12930	0.0451237	0.428675	Metabolism	Amino acid metabolism	gene_Solyc05g010420.2|gene_Solyc01g162830.1|gene_Solyc03g007240.3|gene_Solyc12g005940.2	Solyc05g010420.2;Solyc01g162830.1;Solyc03g007240.3;Solyc12g005940.2
6	map00940	Phenylpropanoid biosynthesis	KEGG PATHWAY	6/133	243/12930	0.0395642	0.451032	Metabolism	Biosynthesis of other secondary metabolites	gene_Solyc10g086180.2|gene_Solyc03g117870.3|gene_Solyc11g071470.1|gene_Solyc11g018772.1|gene_Solyc04g071900.5|gene_Solyc01g105070.3	Solyc10g086180.2;Solyc03g117870.3;Solyc11g071470.1;Solyc11g018772.1;Solyc04g071900.5;Solyc01g105070.3
1	map00660	C5-Branched dibasic acid metabolism	KEGG PATHWAY	1/133	8/12930	0.0794076	0.502915	Metabolism	Carbohydrate metabolism	gene_Solyc03g044330.1	Solyc03g044330.1
7	map04626	Plant-pathogen interaction	KEGG PATHWAY	7/133	304/12930	0.0375626	0.535267	Organismal Systems	Environmental adaptation	gene_Solyc07g008620.1|gene_Solyc05g050350.2|gene_Solyc02g072470.4|gene_Solyc06g082590.1|gene_Solyc05g050380.4|gene_Solyc02g076980.5.1|gene_Solyc02g077370.1	Solyc07g008620.1;Solyc05g050350.2;Solyc02g072470.4;Solyc06g082590.1;Solyc05g050380.4;Solyc02g076980.5.1;Solyc02g077370.1
2	map00770	Pantothenate and CoA biosynthesis	KEGG PATHWAY	2/133	51/12930	0.0966836	0.551096	Metabolism	Metabolism of cofactors and vitamins	gene_Solyc02g086970.4|gene_Solyc03g044330.1	Solyc02g086970.4;Solyc03g044330.1
3	map00052	Galactose metabolism	KEGG PATHWAY	3/133	65/12930	0.0292638	0.556011	Metabolism	Carbohydrate metabolism	gene_Solyc02g086530.4|gene_Solyc11g065220.2|gene_Solyc07g045160.3	Solyc02g086530.4;Solyc11g065220.2;Solyc07g045160.3
3	map02010	ABC transporters	KEGG PATHWAY	3/133	113/12930	0.110742	0.573843	Environmental Information Processing	Membrane transport	gene_Solyc08g067610.3|gene_Solyc05g053600.3|gene_Solyc09g091660.3	Solyc08g067610.3;Solyc05g053600.3;Solyc09g091660.3
1	map00905	Brassinosteroid biosynthesis	KEGG PATHWAY	1/133	16/12930	0.152553	0.668888	Metabolism	Metabolism of terpenoids and polyketides	gene_Solyc12g006860.2	Solyc12g006860.2
1	map00903	Limonene and pinene degradation	KEGG PATHWAY	1/133	15/12930	0.143735	0.682743	Metabolism	Metabolism of terpenoids and polyketides	gene_Solyc02g086970.4	Solyc02g086970.4
1	map01040	Biosynthesis of unsaturated fatty acids	KEGG PATHWAY	1/133	33/12930	0.289386	0.749773	Metabolism	Lipid metabolism	gene_Solyc04g040130.1	Solyc04g040130.1
1	map03440	Homologous recombination	KEGG PATHWAY	1/133	100/12930	0.645817	0.751257	Genetic Information Processing	Replication and repair	gene_Solyc01g103960.3	Solyc01g103960.3
1	map04145	Phagosome	KEGG PATHWAY	1/133	104/12930	0.660278	0.752717	Cellular Processes	Transport and catabolism	gene_Solyc04g048900.3	Solyc04g048900.3
1	map04070	Phosphatidylinositol signaling system	KEGG PATHWAY	1/133	95/12930	0.626879	0.760257	Environmental Information Processing	Signal transduction	gene_Solyc04g014800.3	Solyc04g014800.3
1	map00710	Carbon fixation in photosynthetic organisms	KEGG PATHWAY	1/133	95/12930	0.626879	0.760257	Metabolism	Energy metabolism	gene_Solyc03g120990.3	Solyc03g120990.3
2	map03018	RNA degradation	KEGG PATHWAY	2/133	146/12930	0.444576	0.767904	Genetic Information Processing	Folding, sorting and degradation	gene_Solyc10g085750.2|gene_Solyc07g045160.3	Solyc10g085750.2;Solyc07g045160.3
1	map00561	Glycerolipid metabolism	KEGG PATHWAY	1/133	90/12930	0.606936	0.768785	Metabolism	Lipid metabolism	gene_Solyc02g086970.4	Solyc02g086970.4
2	map00053	Ascorbate and aldarate metabolism	KEGG PATHWAY	2/133	81/12930	0.202659	0.770106	Metabolism	Carbohydrate metabolism	gene_Solyc02g086970.4|gene_Solyc04g014800.3	Solyc02g086970.4;Solyc04g014800.3
1	map00290	Valine, leucine and isoleucine biosynthesis	KEGG PATHWAY	1/133	27/12930	0.243798	0.772028	Metabolism	Amino acid metabolism	gene_Solyc03g044330.1	Solyc03g044330.1
2	map00520	Amino sugar and nucleotide sugar metabolism	KEGG PATHWAY	2/133	204/12930	0.623666	0.772804	Metabolism	Carbohydrate metabolism	gene_Solyc02g082930.3|gene_Solyc11g065220.2	Solyc02g082930.3;Solyc11g065220.2
1	map00941	Flavonoid biosynthesis	KEGG PATHWAY	1/133	88/12930	0.598666	0.775544	Metabolism	Biosynthesis of other secondary metabolites	gene_Solyc11g071470.1	Solyc11g071470.1
1	map00650	Butanoate metabolism	KEGG PATHWAY	1/133	31/12930	0.274502	0.78233	Metabolism	Carbohydrate metabolism	gene_Solyc03g044330.1	Solyc03g044330.1
3	map00500	Starch and sucrose metabolism	KEGG PATHWAY	3/133	182/12930	0.288296	0.782518	Metabolism	Carbohydrate metabolism	gene_Solyc08g077530.4|gene_Solyc09g075360.5|gene_Solyc11g065220.2	Solyc08g077530.4;Solyc09g075360.5;Solyc11g065220.2
1	map00250	Alanine, aspartate and glutamate metabolism	KEGG PATHWAY	1/133	56/12930	0.440241	0.78418	Metabolism	Amino acid metabolism	gene_Solyc03g083440.4	Solyc03g083440.4
1	map00280	Valine, leucine and isoleucine degradation	KEGG PATHWAY	1/133	87/12930	0.594466	0.788013	Metabolism	Amino acid metabolism	gene_Solyc02g086970.4	Solyc02g086970.4
2	map00562	Inositol phosphate metabolism	KEGG PATHWAY	2/133	97/12930	0.263389	0.790168	Metabolism	Carbohydrate metabolism	gene_Solyc04g050860.4|gene_Solyc04g014800.3	Solyc04g050860.4;Solyc04g014800.3
2	map04120	Ubiquitin mediated proteolysis	KEGG PATHWAY	2/133	192/12930	0.590539	0.801445	Genetic Information Processing	Folding, sorting and degradation	gene_Solyc09g008430.4|gene_Solyc06g043150.4	Solyc09g008430.4;Solyc06g043150.4
1	map00410	beta-Alanine metabolism	KEGG PATHWAY	1/133	74/12930	0.535734	0.8036	Metabolism	Metabolism of other amino acids	gene_Solyc02g086970.4	Solyc02g086970.4
1	map00999	Biosynthesis of various plant secondary metabolites	KEGG PATHWAY	1/133	66/12930	0.495472	0.806912	Metabolism	Biosynthesis of other secondary metabolites	gene_Solyc01g162830.1	Solyc01g162830.1
3	map00010	Glycolysis / Gluconeogenesis	KEGG PATHWAY	3/133	165/12930	0.241087	0.80835	Metabolism	Carbohydrate metabolism	gene_Solyc02g086970.4|gene_Solyc11g065220.2|gene_Solyc07g045160.3	Solyc02g086970.4;Solyc11g065220.2;Solyc07g045160.3
2	map00051	Fructose and mannose metabolism	KEGG PATHWAY	2/133	80/12930	0.198911	0.809852	Metabolism	Carbohydrate metabolism	gene_Solyc11g065220.2|gene_Solyc07g045160.3	Solyc11g065220.2;Solyc07g045160.3
1	map00071	Fatty acid degradation	KEGG PATHWAY	1/133	78/12930	0.554652	0.810645	Metabolism	Lipid metabolism	gene_Solyc02g086970.4	Solyc02g086970.4
3	map04141	Protein processing in endoplasmic reticulum	KEGG PATHWAY	3/133	287/12930	0.56954	0.811594	Genetic Information Processing	Folding, sorting and degradation	gene_Solyc03g117630.1|gene_Solyc04g048900.3|gene_Solyc03g112590.4	Solyc03g117630.1;Solyc04g048900.3;Solyc03g112590.4
1	map00030	Pentose phosphate pathway	KEGG PATHWAY	1/133	64/12930	0.484877	0.812882	Metabolism	Carbohydrate metabolism	gene_Solyc07g045160.3	Solyc07g045160.3
1	map00909	Sesquiterpenoid and triterpenoid biosynthesis	KEGG PATHWAY	1/133	54/12930	0.428495	0.814141	Metabolism	Metabolism of terpenoids and polyketides	gene_Solyc11g007980.2	Solyc11g007980.2
1	map00130	Ubiquinone and other terpenoid-quinone biosynthesis	KEGG PATHWAY	1/133	54/12930	0.428495	0.814141	Metabolism	Metabolism of cofactors and vitamins	gene_Solyc03g117870.3	Solyc03g117870.3
1	map00380	Tryptophan metabolism	KEGG PATHWAY	1/133	85/12930	0.585935	0.814593	Metabolism	Amino acid metabolism	gene_Solyc02g086970.4	Solyc02g086970.4
1	map00360	Phenylalanine metabolism	KEGG PATHWAY	1/133	73/12930	0.530881	0.817843	Metabolism	Amino acid metabolism	gene_Solyc10g086180.2	Solyc10g086180.2
1	map00945	Stilbenoid, diarylheptanoid and gingerol biosynthesis	KEGG PATHWAY	1/133	71/12930	0.521024	0.824954	Metabolism	Biosynthesis of other secondary metabolites	gene_Solyc11g071470.1	Solyc11g071470.1
2	map00620	Pyruvate metabolism	KEGG PATHWAY	2/133	140/12930	0.423495	0.832387	Metabolism	Carbohydrate metabolism	gene_Solyc03g120990.3|gene_Solyc02g086970.4	Solyc03g120990.3;Solyc02g086970.4
1	map00340	Histidine metabolism	KEGG PATHWAY	1/133	26/12930	0.235923	0.840475	Metabolism	Amino acid metabolism	gene_Solyc02g086970.4	Solyc02g086970.4
1	map04712	Circadian rhythm - plant	KEGG PATHWAY	1/133	48/12930	0.391769	0.858879	Organismal Systems	Environmental adaptation	gene_Solyc03g081270.2	Solyc03g081270.2
1	map00904	Diterpenoid biosynthesis	KEGG PATHWAY	1/133	53/12930	0.422531	0.860152	Metabolism	Metabolism of terpenoids and polyketides	gene_Solyc03g006880.3	Solyc03g006880.3
5	map04075	Plant hormone signal transduction	KEGG PATHWAY	5/133	393/12930	0.379582	0.865447	Environmental Information Processing	Signal transduction	gene_Solyc08g066350.2|gene_Solyc10g086380.1|gene_Solyc01g098400.3|gene_Solyc08g082630.3|gene_Solyc02g092820.4	Solyc08g066350.2;Solyc10g086380.1;Solyc01g098400.3;Solyc08g082630.3;Solyc02g092820.4
1	map00040	Pentose and glucuronate interconversions	KEGG PATHWAY	1/133	145/12930	0.778575	0.870172	Metabolism	Carbohydrate metabolism	gene_Solyc02g080200.5	Solyc02g080200.5
1	map03015	mRNA surveillance pathway	KEGG PATHWAY	1/133	152/12930	0.794208	0.870574	Genetic Information Processing	Translation	gene_Solyc10g085750.2	Solyc10g085750.2
2	map04016	MAPK signaling pathway - plant	KEGG PATHWAY	2/133	296/12930	0.812365	0.873676	Environmental Information Processing	Signal transduction	gene_Solyc02g072470.4|gene_Solyc02g082930.3	Solyc02g072470.4;Solyc02g082930.3
1	map00400	Phenylalanine, tyrosine and tryptophan biosynthesis	KEGG PATHWAY	1/133	52/12930	0.416505	0.879288	Metabolism	Amino acid metabolism	gene_Solyc11g009080.2	Solyc11g009080.2
1	map03040	Spliceosome	KEGG PATHWAY	1/133	225/12930	0.904331	0.92048	Genetic Information Processing	Transcription	gene_Solyc03g117630.1	Solyc03g117630.1
1	map04144	Endocytosis	KEGG PATHWAY	1/133	213/12930	0.891461	0.923878	Cellular Processes	Transport and catabolism	gene_Solyc03g117630.1	Solyc03g117630.1
1	map00195	Photosynthesis	KEGG PATHWAY	1/133	204/12930	0.880694	0.929621	Metabolism	Energy metabolism	gene_Solyc10g075160.1	Solyc10g075160.1
1	map00310	Lysine degradation	KEGG PATHWAY	1/133	46/12930	0.379014	0.939297	Metabolism	Amino acid metabolism	gene_Solyc02g086970.4	Solyc02g086970.4
1	map04130	SNARE interactions in vesicular transport	KEGG PATHWAY	1/133	46/12930	0.379014	0.939297	Genetic Information Processing	Folding, sorting and degradation	gene_Solyc01g006950.3	Solyc01g006950.3
2	map03010	Ribosome	KEGG PATHWAY	2/133	480/12930	0.960677	0.960677	Genetic Information Processing	Translation	gene_Solyc10g047150.3|gene_Solyc06g076870.5	Solyc10g047150.3;Solyc06g076870.5
