# Supplementary material for: Physiological and molecular response mechanisms of tomato seedlings to cadmium (Cd) and lead (Pb) stress
Source: PeerJ. 2024 Nov 29;12:e18533. doi: 10.7717/peerj.18533 (PMC11610467; doi:10.7717/peerj.18533)
Supplement: Supplemental Information 12 [file peerj-12-18533-s012.xlsx]

## Sheet: 453 DEGs
Supplementary Dataset 4. Common DEGs in Cd vs. Control group, Pd vs. Control group, and Cd+Pd vs. Control group of tomato seedlings.
Gene_id	Gene_name	Gene_description	Control_1	Control_2	Control_3	Cd_1	Cd_2	Cd_3	Pb_1	Pb_2	Pb_3	Cd+Pb_1	Cd+Pb_2	Cd+Pb_3	Control	Cd	Pb	Cd+Pb	GO_id	GO_term	KO_id	KO_name	Pathway_id	Pathway_definition	COG_id	COG_Functional Categories	NR_hit-name	NR_description	Swiss-Prot_hit-name	Swiss-Prot_description	Pfam_id	Domain	Domain description
gene_Solyc01g009860.3	Solyc01g009860.3	NAC domain-containing protein (AHRD V3.3 *** A0A2K3LZ45_TRIPR)	138.11	165.39	168.51	262.44	130.58	229.85	165.92	231.1	152.78	98.09	74.04	68.51	157.337	207.623	183.267	80.2133	GO:0010150;GO:0009737;GO:0010089;GO:0006355;GO:0045892;GO:0009651;GO:000367	BP:leaf senescence;BP:response to abscisic acid;BP:xylem development;BP:regulation of transcription, DNA-templated;BP:negative regulation of transcription, DNA-templated;BP:response to salt stress;MF:DNA binding;	------	------	------	------	ENOG410YED8	K:Transcription	NP_001233811.1	uncharacterized protein LOC100147720 [Solanum lycopersicum]	sp|Q9FY93|NAC83_ARATH;	NAC domain-containing protein 83 OS=Arabidopsis thaliana OX=3702 GN=NAC083 PE=1 SV=1;	PF02365.17	NAM	No apical meristem
gene_Solyc01g090460.3	Solyc01g090460.3	HD-ZIP	6.4	7.41	9.41	2.87	6.83	5.21	5.42	3.87	7	6	19.27	13.65	7.74	4.97	5.43	12.9733	GO:0005634;GO:0043565;GO:0000981;GO:000367	CC:nucleus;MF:sequence-specific DNA binding;MF:RNA polymerase II transcription factor activity, sequence-specific DNA binding;MF:DNA binding;	K09338	HD-ZIP	------	------	ENOG410Z2UE	K:Transcription	NP_001234233.1	HD-ZIP protein [Solanum lycopersicum]	sp|P46602|HAT3_ARATH;	Homeobox-leucine zipper protein HAT3 OS=Arabidopsis thaliana OX=3702 GN=HAT3 PE=1 SV=2;	PF00046.31;PF04618.14;PF02183.20;PF05920.13	Homeodomain;HD-ZIP_N;HALZ;Homeobox_KN	Homeodomain;HD-ZIP protein N terminus;Homeobox associated leucine zipper;Homeobox KN domain
gene_Solyc01g091540.3	Solyc01g091540.3	Growth-regulating factor 10 (AHRD V3.3 *** A0A2G3AGX2_CAPAN)	0.57	1.52	2.35	1	1.52	0.89	2.37	1.06	2.11	3.1	6.04	5.72	1.48	1.13667	1.84667	4.95333	GO:0032502;GO:0006355;GO:0006351;GO:0005634;GO:000552	BP:developmental process;BP:regulation of transcription, DNA-templated;BP:transcription, DNA-templated;CC:nucleus;MF:ATP binding;	------	------	------	------	ENOG4111AY1	K:Transcription	XP_010325825.1	growth-regulating factor 9 [Solanum lycopersicum]	sp|Q8S9M3|GRF9_ARATH;	Growth-regulating factor 9 OS=Arabidopsis thaliana OX=3702 GN=GRF9 PE=1 SV=1;	PF08879.12;PF08880.13	WRC;QLQ	WRC;QLQ
gene_Solyc02g077370.1	Solyc02g077370.1	Ethylene Response Factor C.5	11.77	7.43	6.68	17.09	35.77	11.84	13.22	20.44	10.9	6.39	3.91	5.06	8.62667	21.5667	14.8533	5.12	GO:0006952;GO:0006355;GO:0009873;GO:0005634;GO:0003700;GO:000367	BP:defense response;BP:regulation of transcription, DNA-templated;BP:ethylene-activated signaling pathway;CC:nucleus;MF:transcription factor activity, sequence-specific DNA binding;MF:DNA binding;	K13433	PTI5	map04626	Plant-pathogen interaction	ENOG410YP8B	K:Transcription	NP_001233987.1	pathogenesis-related genes transcriptional activator PTI5 [Solanum lycopersicum]	sp|O04681|PTI5_SOLLC;	Pathogenesis-related genes transcriptional activator PTI5 OS=Solanum lycopersicum OX=4081 GN=PTI5 PE=2 SV=1;	PF00847.22	AP2	AP2 domain
gene_Solyc02g080260.4	Solyc02g080260.4	Woolly	4.92	7.01	10.99	6.48	12.9	6.47	12.71	7.41	15.36	16.64	19.11	31.01	7.64	8.61667	11.8267	22.2533	GO:0005634;GO:0008289;GO:000367	CC:nucleus;MF:lipid binding;MF:DNA binding;	K09338	HD-ZIP	------	------	ENOG411107H	K:Transcription	XP_004232734.1	homeobox-leucine zipper protein PROTODERMAL FACTOR 2 [Solanum lycopersicum]	sp|Q93V99|PDF2_ARATH;	Homeobox-leucine zipper protein PROTODERMAL FACTOR 2 OS=Arabidopsis thaliana OX=3702 GN=PDF2 PE=1 SV=1;	PF01852.21;PF00046.31	START;Homeodomain	START domain;Homeodomain
gene_Solyc03g007380.2	Solyc03g007380.2	WRKY transcription factor 52	2.34	1.66	1.84	8.43	11.22	8.32	5.66	10.27	3.82	1.53	1.92	0.76	1.94667	9.32333	6.58333	1.40333	GO:0006355;GO:0005634;GO:0003700;GO:0043565;GO:000097	BP:regulation of transcription, DNA-templated;CC:nucleus;MF:transcription factor activity, sequence-specific DNA binding;MF:sequence-specific DNA binding;MF:transcription regulatory region sequence-specific DNA binding;	------	------	------	------	ENOG410YZU1	K:Transcription	XP_004234275.1	probable WRKY transcription factor 41 [Solanum lycopersicum]	sp|Q8H0Y8|WRK41_ARATH;	Probable WRKY transcription factor 41 OS=Arabidopsis thaliana OX=3702 GN=WRKY41 PE=1 SV=2;	PF03106.17	WRKY	WRKY DNA -binding domain
gene_Solyc03g082430.1	Solyc03g082430.1	Growth-regulating factor 5 (AHRD V3.3 *** A0A2G3A035_CAPAN)	0	0.05	0.35	0.06	0.26	0.11	0.35	0.06	0.51	0.3	10.36	1.71	0.133333	0.143333	0.306667	4.12333	GO:0032502;GO:0006355;GO:0006351;GO:0005634;GO:000552	BP:developmental process;BP:regulation of transcription, DNA-templated;BP:transcription, DNA-templated;CC:nucleus;MF:ATP binding;	------	------	------	------	ENOG4111821	K:Transcription	XP_010318056.1	growth-regulating factor 3-like [Solanum lycopersicum]	sp|Q9FJB8|GRF7_ARATH;	Growth-regulating factor 7 OS=Arabidopsis thaliana OX=3702 GN=GRF7 PE=2 SV=1;	PF08879.12;PF08880.13	WRC;QLQ	WRC;QLQ
gene_Solyc03g093890.3	Solyc03g093890.3	R2R3MYB transcription factor 52	6.56	4.28	2.62	9.29	4.07	4.51	8	13.1	3.21	2.43	2.37	1.6	4.48667	5.95667	8.10333	2.13333	GO:000563	CC:nucleus;	K09422	MYBP	------	------	COG5147	K:Transcription	NP_001333764.1	R2R3MYB transcription factor 52 [Solanum lycopersicum]	sp|Q9SJX8|MYB14_ARATH;	Transcription factor MYB14 OS=Arabidopsis thaliana OX=3702 GN=MYB14 PE=2 SV=1;	PF00249.33;PF13921.8	Myb_DNA-binding;Myb_DNA-bind_6	Myb-like DNA-binding domain;Myb-like DNA-binding domain
gene_Solyc04g005610.3	Solyc04g005610.3	NAC domain-containing protein 2 (AHRD V3.3 *** NAP2_SOLLC)	5.6	10.3	4.23	5.16	1.57	4.7	2.61	3.69	2.48	0.64	0.84	0.19	6.71	3.81	2.92667	0.556667	GO:0006355;GO:000367	BP:regulation of transcription, DNA-templated;MF:DNA binding;	------	------	------	------	ENOG410YB53	K:Transcription	NP_001352326.1	NAC domain-containing protein 2 [Solanum lycopersicum]	sp|K4BNG7|NAP2_SOLLC;	NAC domain-containing protein 2 OS=Solanum lycopersicum OX=4081 GN=NAP2 PE=2 SV=1;	PF02365.17	NAM	No apical meristem
gene_Solyc04g007210.3	Solyc04g007210.3	Zinc finger protein CONSTANS-LIKE 7 (AHRD V3.3 *** A0A2G2VK65_CAPBA)	59.64	69.72	54.98	61.11	39.89	64	35.15	43.08	36.87	17.53	13.4	14.15	61.4467	55	38.3667	15.0267	GO:0006355;GO:0005634;GO:0008270;GO:000551	BP:regulation of transcription, DNA-templated;CC:nucleus;MF:zinc ion binding;MF:protein binding;	------	------	------	------	COG5641	K:Transcription	XP_004236986.1	zinc finger protein CONSTANS-LIKE 16 [Solanum lycopersicum]	sp|Q8RWD0|COL16_ARATH;	Zinc finger protein CONSTANS-LIKE 16 OS=Arabidopsis thaliana OX=3702 GN=COL16 PE=1 SV=2;	PF06203.16;PF00643.26	CCT;zf-B_box	CCT motif;B-box zinc finger
gene_Solyc04g051690.4	Solyc04g051690.4	WRKY transcription factor 51	37.32	35.06	42.54	61.17	59.71	58.94	56.11	115.14	29.24	10.01	17.14	8.8	38.3067	59.94	66.83	11.9833	GO:0006355;GO:0005634;GO:0003700;GO:004356	BP:regulation of transcription, DNA-templated;CC:nucleus;MF:transcription factor activity, sequence-specific DNA binding;MF:sequence-specific DNA binding;	------	------	------	------	ENOG410YQZM	K:Transcription	XP_004237467.1	probable WRKY transcription factor 51 [Solanum lycopersicum]	sp|Q93WU9|WRK51_ARATH;	Probable WRKY transcription factor 51 OS=Arabidopsis thaliana OX=3702 GN=WRKY51 PE=1 SV=1;	PF03106.17	WRKY	WRKY DNA -binding domain
gene_Solyc04g072070.4	Solyc04g072070.4	DNA-binding WRKY (AHRD V3.11 *-* tr|A0A200R2S6|A0A200R2S6_9MAGN)	5.83	5.01	3.86	16.62	15.54	11.17	21.12	30.39	6.54	5.84	6.11	2.87	4.9	14.4433	19.35	4.94	GO:0005634;GO:0003700;GO:004356	CC:nucleus;MF:transcription factor activity, sequence-specific DNA binding;MF:sequence-specific DNA binding;	------	------	------	------	ENOG410YQZM	K:Transcription	XP_004237841.1	probable WRKY transcription factor 51 [Solanum lycopersicum]	sp|Q93WU9|WRK51_ARATH;	Probable WRKY transcription factor 51 OS=Arabidopsis thaliana OX=3702 GN=WRKY51 PE=1 SV=1;	PF03106.17	WRKY	WRKY DNA -binding domain
gene_Solyc04g077490.3	Solyc04g077490.3	AP2-like ethylene-responsive transcription factor ANT (AHRD V3.3 *** A0A2G2Z848_CAPAN)	13.9	10.67	17.85	6.85	9.9	6.59	11.14	6.83	12.67	13.67	52.36	23.3	14.14	7.78	10.2133	29.7767	GO:0006952;GO:0006355;GO:0009873;GO:0005634;GO:0003700;GO:000367	BP:defense response;BP:regulation of transcription, DNA-templated;BP:ethylene-activated signaling pathway;CC:nucleus;MF:transcription factor activity, sequence-specific DNA binding;MF:DNA binding;	K09285	OVM, ANT	------	------	ENOG410Y9X6	K:Transcription	NP_001287930.1	AP2-like ethylene-responsive transcription factor ANT-like [Solanum lycopersicum]	sp|Q38914|ANT_ARATH;	AP2-like ethylene-responsive transcription factor ANT OS=Arabidopsis thaliana OX=3702 GN=ANT PE=1 SV=2;	PF00847.22	AP2	AP2 domain
gene_Solyc05g007770.3	Solyc05g007770.3	NAC domain TF	19.79	20.38	12.57	20.85	16.16	14.05	14.43	18.69	16.88	9.68	7.58	5.87	17.58	17.02	16.6667	7.71	GO:0031155;GO:0010150;GO:0006355;GO:0005634;GO:0043565;GO:000367	BP:regulation of reproductive fruiting body development;BP:leaf senescence;BP:regulation of transcription, DNA-templated;CC:nucleus;MF:sequence-specific DNA binding;MF:DNA binding;	------	------	------	------	ENOG410YB53	K:Transcription	NP_001316452.1	NAC domain-containing protein 1 [Solanum lycopersicum]	sp|K4BWV2|NAP1_SOLLC;	NAC domain-containing protein 1 OS=Solanum lycopersicum OX=4081 GN=NAP1 PE=2 SV=1;	PF02365.17	NAM	No apical meristem
gene_Solyc05g007890.5	Solyc05g007890.5	Myb family transcription factor APL (AHRD V3.11 *** tr|A0A2G2VLB7|A0A2G2VLB7_CAPBA)	38.83	37.74	35.29	25.59	15.45	27.05	16.7	28.16	18.33	9.29	11.37	9.48	37.2867	22.6967	21.0633	10.0467	GO:0005634;GO:000367	CC:nucleus;MF:DNA binding;	------	------	------	------	ENOG4111ACN	K:Transcription	XP_004238822.1	myb family transcription factor PHL8 [Solanum lycopersicum]	sp|F4I274|PHL8_ARATH;	Myb family transcription factor PHL8 OS=Arabidopsis thaliana OX=3702 GN=PHL8 PE=2 SV=1;	PF14379.8;PF00249.33	Myb_CC_LHEQLE;Myb_DNA-binding	MYB-CC type transfactor, LHEQLE motif;Myb-like DNA-binding domain
gene_Solyc05g009310.3	Solyc05g009310.3	Zinc finger protein CONSTANS-LIKE 7 (AHRD V3.3 *** A0A2G2VK65_CAPBA)	100.59	136.41	120.24	104.44	101.78	146.57	95.88	87.67	79.22	36.66	25.09	40.31	119.08	117.597	87.59	34.02	GO:0006355;GO:0005634;GO:0008270;GO:000551	BP:regulation of transcription, DNA-templated;CC:nucleus;MF:zinc ion binding;MF:protein binding;	------	------	------	------	COG5641	K:Transcription	XP_004238926.1	zinc finger protein CONSTANS-LIKE 16-like [Solanum lycopersicum]	sp|Q8RWD0|COL16_ARATH;	Zinc finger protein CONSTANS-LIKE 16 OS=Arabidopsis thaliana OX=3702 GN=COL16 PE=1 SV=2;	PF06203.16;PF00643.26	CCT;zf-B_box	CCT motif;B-box zinc finger
gene_Solyc05g050340.4	Solyc05g050340.4	WRKY transcription factor 58	8.17	5.1	6.51	13.82	5.68	11.68	9.73	17	8.62	5.18	4.18	3.56	6.59333	10.3933	11.7833	4.30667	GO:0006952;GO:0006355;GO:0009873;GO:0005634;GO:0043565;GO:000370	BP:defense response;BP:regulation of transcription, DNA-templated;BP:ethylene-activated signaling pathway;CC:nucleus;MF:sequence-specific DNA binding;MF:transcription factor activity, sequence-specific DNA binding;	------	------	------	------	ENOG410YZU1	K:Transcription	XP_027772871.1	probable WRKY transcription factor 41 [Solanum pennellii]	sp|Q0DFT7|WRK19_ORYSJ;	Transcription factor WRKY19 OS=Oryza sativa subsp. japonica OX=39947 GN=WRKY19 PE=2 SV=1;	PF03106.17	WRKY	WRKY DNA -binding domain
gene_Solyc06g005310.3	Solyc06g005310.3	Transcription factor MYB48 (AHRD V3.3 *** A0A2G2Z7N5_CAPAN)	35.79	40.54	24.89	39.41	10.99	36.7	14.68	18.79	14.9	4.01	4.08	2.26	33.74	29.0333	16.1233	3.45	GO:0006355;GO:0005634;GO:0003700;GO:004356	BP:regulation of transcription, DNA-templated;CC:nucleus;MF:transcription factor activity, sequence-specific DNA binding;MF:sequence-specific DNA binding;	K09422	MYBP	------	------	COG5147	K:Transcription	XP_004240351.1	transcription factor MYB48-like [Solanum lycopersicum]	sp|Q9LX82|MYB48_ARATH;	Transcription factor MYB48 OS=Arabidopsis thaliana OX=3702 GN=MYB48 PE=2 SV=1;	PF00249.33;PF13921.8	Myb_DNA-binding;Myb_DNA-bind_6	Myb-like DNA-binding domain;Myb-like DNA-binding domain
gene_Solyc06g069430.3	Solyc06g069430.3	FRUITFULL-like MADS-box 1	34.17	32.35	29.28	16.7	8.29	17.98	18.34	25.8	23.34	8.17	7.61	3.69	31.9333	14.3233	22.4933	6.49	GO:0006355;GO:0006357;GO:0045944;GO:0005634;GO:0003700;GO:0000977;GO:0003677;GO:0046983;GO:0000978;GO:000098	BP:regulation of transcription, DNA-templated;BP:regulation of transcription from RNA polymerase II promoter;BP:positive regulation of transcription from RNA polymerase II promoter;CC:nucleus;MF:transcription factor activity, sequence-specific DNA binding;MF:RNA polymerase II regulatory region sequence-specific DNA binding;MF:DNA binding;MF:protein dimerization activity;MF:RNA polymerase II core …	K09264	K09264	------	------	COG5068	K:Transcription	NP_001234173.2	agamous-like MADS-box protein AGL8 homolog [Solanum lycopersicum]	sp|Q42429|AGL8_SOLTU;	Agamous-like MADS-box protein AGL8 homolog OS=Solanum tuberosum OX=4113 PE=2 SV=1;	PF01486.19;PF00319.20	K-box;SRF-TF	K-box region;SRF-type transcription factor
gene_Solyc06g075660.4	Solyc06g075660.4	MYB transcription factor (AHRD V3.3 *-* B4FPU3_MAIZE)	17.37	24.77	14.75	22.29	12.23	27.18	20.94	22.15	20.03	7.85	7.69	5.09	18.9633	20.5667	21.04	6.87667	GO:0006355;GO:0005634;GO:0003700;GO:004356	BP:regulation of transcription, DNA-templated;CC:nucleus;MF:transcription factor activity, sequence-specific DNA binding;MF:sequence-specific DNA binding;	K09422	MYBP	------	------	COG5147	K:Transcription	NP_001310217.1	transcription factor MYB48-like [Solanum lycopersicum]	sp|Q9LX82|MYB48_ARATH;	Transcription factor MYB48 OS=Arabidopsis thaliana OX=3702 GN=MYB48 PE=2 SV=1;	PF00249.33;PF13921.8	Myb_DNA-binding;Myb_DNA-bind_6	Myb-like DNA-binding domain;Myb-like DNA-binding domain
gene_Solyc06g082590.1	Solyc06g082590.1	DNA-binding protein Pti6	17.56	11.69	13.37	36.09	38.64	29.63	16.24	32.62	14.61	10.94	9.3	6.85	14.2067	34.7867	21.1567	9.03	GO:0006952;GO:0006355;GO:0009873;GO:0005634;GO:0003700;GO:000367	BP:defense response;BP:regulation of transcription, DNA-templated;BP:ethylene-activated signaling pathway;CC:nucleus;MF:transcription factor activity, sequence-specific DNA binding;MF:DNA binding;	K13434	PTI6	map04626	Plant-pathogen interaction	ENOG410YQGI	K:Transcription	NP_001233991.1	pathogenesis-related genes transcriptional activator PTI6 [Solanum lycopersicum]	sp|O04682|PTI6_SOLLC;	Pathogenesis-related genes transcriptional activator PTI6 OS=Solanum lycopersicum OX=4081 GN=PTI6 PE=2 SV=1;	PF00847.22	AP2	AP2 domain
gene_Solyc07g066330.3	Solyc07g066330.3	NAC domain-containing protein (AHRD V3.3 *** A0A2G2WGF8_CAPBA)	0.48	2.72	0.32	7.98	1.83	7.04	0.64	0.57	1.04	0	0	0.11	1.17333	5.61667	0.75	0.036667	GO:0006355;GO:000367	BP:regulation of transcription, DNA-templated;MF:DNA binding;	------	------	------	------	ENOG410YDRK	S:Function unknown	XP_004243993.1	NAC domain-containing protein 21/22 isoform X1 [Solanum lycopersicum]	sp|Q84TE6|NAC22_ARATH;	NAC domain-containing protein 21/22 OS=Arabidopsis thaliana OX=3702 GN=NAC021 PE=1 SV=2;	PF02365.17	NAM	No apical meristem
gene_Solyc08g006210.4	Solyc08g006210.4	Transcriptional factor B3 family protein (AHRD V3.11 *** tr|A0A1P8AYQ9|A0A1P8AYQ9_ARATH)	0	0	0	0.1	0.16	0	0.08	0.05	0.19	0.51	0.97	0.41	0	0.086667	0.106667	0.63	GO:0005634;GO:0016021;GO:000367	CC:nucleus;CC:integral component of membrane;MF:DNA binding;	------	------	------	------	ENOG410Z6HB	K:Transcription	TMW93633.1	hypothetical protein EJD97_011358 [Solanum chilense]	sp|P0DH85|REM10_ARATH;	B3 domain-containing protein REM10 OS=Arabidopsis thaliana OX=3702 GN=REM10 PE=1 SV=1;	PF02362.23	B3	B3 DNA binding domain
gene_Solyc08g008305.1	Solyc08g008305.1	Ethylene-responsive transcription factor (AHRD V3.3 *** A0A2G2W2X0_CAPBA)	7.1	10.72	11.27	30.17	18.1	35.41	12.95	15.97	9.09	3.1	1.83	2.45	9.69667	27.8933	12.67	2.46	GO:0006952;GO:0006355;GO:0009873;GO:0005634;GO:0003700;GO:000367	BP:defense response;BP:regulation of transcription, DNA-templated;BP:ethylene-activated signaling pathway;CC:nucleus;MF:transcription factor activity, sequence-specific DNA binding;MF:DNA binding;	------	------	------	------	ENOG410YMKN	K:Transcription	XP_004244631.1	ethylene-responsive transcription factor ERF061 [Solanum lycopersicum]	sp|Q9C7W2|ERF61_ARATH;	Ethylene-responsive transcription factor ERF061 OS=Arabidopsis thaliana OX=3702 GN=ERF061 PE=2 SV=1;	PF00847.22	AP2	AP2 domain
gene_Solyc08g075950.4	Solyc08g075950.4	Growth-regulating factor 5 (AHRD V3.11 *** tr|A0A2G2XMC2|A0A2G2XMC2_CAPBA)	2.64	4.06	6.24	3.47	4.03	4.28	3.94	2.24	5.09	5.36	13.85	8.86	4.31333	3.92667	3.75667	9.35667	GO:0032502;GO:0006355;GO:0006351;GO:0005634;GO:000552	BP:developmental process;BP:regulation of transcription, DNA-templated;BP:transcription, DNA-templated;CC:nucleus;MF:ATP binding;	------	------	------	------	ENOG410YFT7	K:Transcription	XP_019070965.2	growth-regulating factor 4-like [Solanum lycopersicum]	sp|Q6ZIK5|GRF4_ORYSJ;	Growth-regulating factor 4 OS=Oryza sativa subsp. japonica OX=39947 GN=GRF4 PE=1 SV=1;	PF08879.12;PF08880.13	WRC;QLQ	WRC;QLQ
gene_Solyc08g081960.3	Solyc08g081960.3	Solanum Lycopersicum Cytokinin Response Factor 2	1.2	1.95	2.47	1.15	1.72	0.85	2.02	0.33	2.53	3.41	9.07	6.16	1.87333	1.24	1.62667	6.21333	GO:0006952;GO:0006355;GO:0009873;GO:0005634;GO:0003700;GO:000367	BP:defense response;BP:regulation of transcription, DNA-templated;BP:ethylene-activated signaling pathway;CC:nucleus;MF:transcription factor activity, sequence-specific DNA binding;MF:DNA binding;	------	------	------	------	ENOG410YM3E	K:Transcription	XP_004245542.1	ethylene-responsive transcription factor CRF1 [Solanum lycopersicum]	sp|Q9SUQ2|CRF2_ARATH;	Ethylene-responsive transcription factor CRF2 OS=Arabidopsis thaliana OX=3702 GN=CRF2 PE=1 SV=1;	PF00847.22	AP2	AP2 domain
gene_Solyc08g082210.4	Solyc08g082210.4	Ethylene-responsive transcription factor (AHRD V3.3 *** A0A2G3ADG6_CAPAN)	43.68	56.59	33.47	69.53	41.43	72.09	29.71	49.95	33.37	11.5	7.75	9.37	44.58	61.0167	37.6767	9.54	GO:0006952;GO:0006355;GO:0009873;GO:0005634;GO:0003700;GO:000367	BP:defense response;BP:regulation of transcription, DNA-templated;BP:ethylene-activated signaling pathway;CC:nucleus;MF:transcription factor activity, sequence-specific DNA binding;MF:DNA binding;	------	------	------	------	ENOG410YMKN	K:Transcription	XP_004245520.1	ethylene-responsive transcription factor ERF061 [Solanum lycopersicum]	sp|Q9C7W2|ERF61_ARATH;	Ethylene-responsive transcription factor ERF061 OS=Arabidopsis thaliana OX=3702 GN=ERF061 PE=2 SV=1;	PF00847.22	AP2	AP2 domain
gene_Solyc08g082630.3	Solyc08g082630.3	Auxin Response Factor 9A	1	2.17	3.73	1.15	3.2	1.21	3.99	1.7	5.86	5.19	18.39	15.14	2.3	1.85333	3.85	12.9067	GO:0009725;GO:0006355;GO:0009734;GO:0005634;GO:000367	BP:response to hormone;BP:regulation of transcription, DNA-templated;BP:auxin-activated signaling pathway;CC:nucleus;MF:DNA binding;	K14486	K14486, ARF	map04075	Plant hormone signal transduction	ENOG410YECH	K:Transcription	XP_010325288.1	auxin response factor 9 isoform X1 [Solanum lycopersicum]	sp|Q9XED8|ARFI_ARATH;	Auxin response factor 9 OS=Arabidopsis thaliana OX=3702 GN=ARF9 PE=1 SV=1;	PF06507.15;PF02362.23;PF02309.18	Auxin_resp;B3;AUX_IAA	Auxin response factor;B3 DNA binding domain;AUX/IAA family
gene_Solyc09g009200.3	Solyc09g009200.3	Growth-regulating factor 3 (AHRD V3.3 *** A0A2G3BIU0_CAPCH)	1.1	1.3	2.58	0.78	1.54	1.45	1.64	0.78	2.44	2.61	7.39	3.7	1.66	1.25667	1.62	4.56667	GO:0032502;GO:0006355;GO:0006351;GO:0005634;GO:000552	BP:developmental process;BP:regulation of transcription, DNA-templated;BP:transcription, DNA-templated;CC:nucleus;MF:ATP binding;	------	------	------	------	ENOG410Y9TR	K:Transcription	XP_004246560.1	growth-regulating factor 3-like [Solanum lycopersicum]	sp|Q9SJR5|GRF3_ARATH;	Growth-regulating factor 3 OS=Arabidopsis thaliana OX=3702 GN=GRF3 PE=1 SV=1;	PF08879.12;PF08880.13	WRC;QLQ	WRC;QLQ
gene_Solyc10g050970.1	Solyc10g050970.1	Ethylene Response Factor D.4	5.17	1.64	1.88	3.34	2.5	0.48	2.92	0.61	2.63	7.78	18.06	4.86	2.89667	2.10667	2.05333	10.2333	GO:0006952;GO:0006355;GO:0009873;GO:0016021;GO:0005634;GO:0003700;GO:000367	BP:defense response;BP:regulation of transcription, DNA-templated;BP:ethylene-activated signaling pathway;CC:integral component of membrane;CC:nucleus;MF:transcription factor activity, sequence-specific DNA binding;MF:DNA binding;	------	------	------	------	ENOG410YN6X	K:Transcription	XP_004248735.1	ethylene-responsive transcription factor ERF109-like [Solanum lycopersicum]	sp|Q9SZ06|EF109_ARATH;	Ethylene-responsive transcription factor ERF109 OS=Arabidopsis thaliana OX=3702 GN=ERF109 PE=1 SV=1;	PF00847.22	AP2	AP2 domain
gene_Solyc10g074680.2	Solyc10g074680.2	Protein SCARECROW (AHRD V3.3 *** A0A2G3BEK7_CAPCH)	0.91	1.1	1.59	0.66	1.92	0.28	1.8	0.34	2.09	2.61	9.39	6.08	1.2	0.953333	1.41	6.02667	GO:0009956;GO:0051457;GO:0090610;GO:0006355;GO:0048366;GO:0008356;GO:0009630;GO:0005634;GO:0043565;GO:000370	BP:radial pattern formation;BP:maintenance of protein location in nucleus;BP:bundle sheath cell fate specification;BP:regulation of transcription, DNA-templated;BP:leaf development;BP:asymmetric cell division;BP:gravitropism;CC:nucleus;MF:sequence-specific DNA binding;MF:transcription factor activity, sequence-specific DNA binding;	------	------	------	------	ENOG4110TCK	K:Transcription	XP_004249012.1	protein SCARECROW [Solanum lycopersicum]	sp|Q2Z2E9|SCR_IPONI;	Protein SCARECROW OS=Ipomoea nil OX=35883 GN=SCR PE=1 SV=1;	PF03514.16	GRAS	GRAS domain family
gene_Solyc10g086380.1	Solyc10g086380.1	Transcription factor GRAS (AHRD V3.3 *** A0A200PU13_9MAGN)	1.85	2.58	1.82	5.36	1.85	5.81	3.97	5	2.7	1.81	1.81	0.78	2.08333	4.34	3.89	1.46667	GO:0042538;GO:0009740;GO:0006355;GO:0009737;GO:0009867;GO:2000377;GO:0009723;GO:0010187;GO:2000033;GO:0009938;GO:0009863;GO:0005634;GO:0043565;GO:0003700;GO:000371	BP:hyperosmotic salinity response;BP:gibberellic acid mediated signaling pathway;BP:regulation of transcription, DNA-templated;BP:response to abscisic acid;BP:jasmonic acid mediated signaling pathway;BP:regulation of reactive oxygen species metabolic process;BP:response to ethylene;BP:negative regulation of seed germination;BP:regulation of seed dormancy process;BP:negative regulation of gibberel…	K14494	DELLA	map04075	Plant hormone signal transduction	ENOG410YBFY	K:Transcription	XP_004249633.3	DELLA protein GAI [Solanum lycopersicum]	sp|Q7Y1B6|GAI_SOLLC;	DELLA protein GAI OS=Solanum lycopersicum OX=4081 GN=GAI PE=2 SV=1;	PF03514.16	GRAS	GRAS domain family
gene_Solyc11g020670.1	Solyc11g020670.1	TCP transcription factor 12	25.12	27.73	26.76	49.15	26.35	54.58	20.99	28.84	22.8	10.17	10.66	10.01	26.5367	43.36	24.21	10.28	GO:0005634;GO:0003700;GO:004356	CC:nucleus;MF:transcription factor activity, sequence-specific DNA binding;MF:sequence-specific DNA binding;	------	------	------	------	ENOG4111CI8	K:Transcription	NP_001233806.1	TCP transcription factor 12 [Solanum lycopersicum]	sp|Q9LQF0|TCP23_ARATH;	Transcription factor TCP23 OS=Arabidopsis thaliana OX=3702 GN=TCP23 PE=1 SV=1;	PF03634.15	TCP	TCP family transcription factor
gene_Solyc11g068620.2	Solyc11g068620.2	NAC domain (AHRD V3.3 *** A0A200Q6H1_9MAGN)	30.77	23.7	23.55	58.22	25.98	35.45	30.7	60.18	25.18	10.68	8.11	5.46	26.0067	39.8833	38.6867	8.08333	GO:0006355;GO:000367	BP:regulation of transcription, DNA-templated;MF:DNA binding;	------	------	------	------	ENOG410YGJ5	S:Function unknown	XP_004251070.1	NAC domain-containing protein 90 [Solanum lycopersicum]	sp|Q9FMR3|NAC90_ARATH;	NAC domain-containing protein 90 OS=Arabidopsis thaliana OX=3702 GN=NAC090 PE=1 SV=1;	PF02365.17	NAM	No apical meristem
gene_Solyc11g069850.3	Solyc11g069850.3	Telomere repeat-binding protein 6 (AHRD V3.3 *-* A0A2I0VYX5_9ASPA)	0.23	0.25	0.62	0.08	0.36	0.15	0.78	0.3	0.56	0.9	1.98	2.06	0.366667	0.196667	0.546667	1.64667	GO:000563	CC:nucleus;	------	------	------	------	ENOG4111E92	S:Function unknown	TMW92896.1	hypothetical protein EJD97_012426 [Solanum chilense]	sp|Q9SNB9|TRP2_ARATH;	Telomere repeat-binding protein 2 OS=Arabidopsis thaliana OX=3702 GN=TRP2 PE=1 SV=1;	PF00249.33;PF13921.8	Myb_DNA-binding;Myb_DNA-bind_6	Myb-like DNA-binding domain;Myb-like DNA-binding domain
gene_Solyc12g013620.2	Solyc12g013620.2	jasmonic acid 2	86.8	83.15	41.45	46.66	26.31	47.05	13.06	22.85	17.68	6.75	5.88	3.43	70.4667	40.0067	17.8633	5.35333	GO:0006355;GO:0005634;GO:0000721;GO:000367	BP:regulation of transcription, DNA-templated;CC:nucleus;MF:;MF:DNA binding;	------	------	------	------	ENOG4111FG3	K:Transcription	NP_001233972.1	jasmonic acid 2 [Solanum lycopersicum]	sp|Q9SQL0|JA2_SOLLC;	NAC domain-containing protein JA2 OS=Solanum lycopersicum OX=4081 GN=JA2 PE=2 SV=1;	PF02365.17	NAM	No apical meristem
gene_Solyc01g005040.3	Solyc01g005040.3	CASP-like protein (AHRD V3.3 *** A0A2G3CF58_CAPCH)	2.36	2.75	1.72	17.85	8.77	11.06	6.65	8.54	3.78	2.55	2.99	1.33	2.27667	12.56	6.32333	2.29	GO:0016021;GO:000588	CC:integral component of membrane;CC:plasma membrane;	------	------	------	------	ENOG410ZDYN	S:Function unknown	XP_004228943.1	CASP-like protein PIMP1 [Solanum lycopersicum]	sp|A1XGB4|PIMP1_CAPAN;	CASP-like protein PIMP1 OS=Capsicum annuum OX=4072 GN=PIMP1 PE=2 SV=1;	PF04535.14	DUF588	Domain of unknown function
gene_Solyc01g005730.3	Solyc01g005730.3	NL0C (AHRD V3.3 *** Q9ZS83_SOLLC)	4.51	2.75	2.65	3.3	2.09	3.57	4.04	3.58	2.44	6.51	3.6	3.89	3.30333	2.98667	3.35333	4.66667	GO:0016021;GO:0005886;GO:000551	CC:integral component of membrane;CC:plasma membrane;MF:protein binding;	------	------	------	------	COG4886	S:Function unknown	XP_025884867.1	receptor-like protein Cf-9 [Solanum lycopersicum]	sp|Q5MR23|9DC3_SOLPI;	Receptor-like protein 9DC3 OS=Solanum pimpinellifolium OX=4084 GN=9DC3 PE=3 SV=1;	PF13855.8;PF12799.9;PF00560.35;PF08263.14	LRR_8;LRR_4;LRR_1;LRRNT_2	Leucine rich repeat;Leucine Rich repeats;Leucine Rich Repeat;Leucine rich repeat N-terminal domain
gene_Solyc01g006950.3	Solyc01g006950.3	syntaxin-121-like (AHRD V3.3 *** A0A2I4H4W7_9ROSI)	3.43	2.94	2.24	9.27	4.68	4.81	9.75	11.43	5.41	3.28	3.26	1.72	2.87	6.25333	8.86333	2.75333	GO:0006887;GO:0016192;GO:0006906;GO:0048278;GO:0006886;GO:0016020;GO:0016021;GO:0031201;GO:0012505;GO:0005886;GO:0000149;GO:000548	BP:exocytosis;BP:vesicle-mediated transport;BP:vesicle fusion;BP:vesicle docking;BP:intracellular protein transport;CC:membrane;CC:integral component of membrane;CC:SNARE complex;CC:endomembrane system;CC:plasma membrane;MF:SNARE binding;MF:SNAP receptor activity;	K08486	STX1B_2_3	map04130	SNARE interactions in vesicular transport	COG5074	U:Intracellular trafficking, secretion, and vesicular transport	XP_004228675.1	syntaxin-121 [Solanum lycopersicum]	sp|Q9ZSD4|SY121_ARATH;	Syntaxin-121 OS=Arabidopsis thaliana OX=3702 GN=SYP121 PE=1 SV=1;	PF00804.27;PF05739.21	Syntaxin;SNARE	Syntaxin;SNARE domain
gene_Solyc01g007030.3	Solyc01g007030.3	RING-type E3 ubiquitin transferase (AHRD V3.3 *** Q3HLY8_CAPAN)	2.25	1.98	0.99	3.68	5.79	0.67	4.23	4.13	5.12	13.99	8.63	11.41	1.74	3.38	4.49333	11.3433	GO:000484	MF:ubiquitin-protein transferase activity;	------	------	------	------	ENOG410YC1Z	O:Posttranslational modification, protein turnover, chaperones	XP_010315681.1	LOW QUALITY PROTEIN: E3 ubiquitin-protein ligase PUB22-like [Solanum lycopersicum]	sp|Q9SVC6|PUB22_ARATH;	E3 ubiquitin-protein ligase PUB22 OS=Arabidopsis thaliana OX=3702 GN=PUB22 PE=1 SV=1;	------	------	------
gene_Solyc01g008500.4	Solyc01g008500.4	Receptor-like protein kinase (AHRD V3.3 *** A0A2K3L8M9_TRIPR)	6.12	4.62	3.98	14.26	6.55	10.47	11.21	17.28	4.81	4.2	4.06	2.58	4.90667	10.4267	11.1	3.61333	GO:0006468;GO:0016021;GO:0030247;GO:0005524;GO:000467	BP:protein phosphorylation;CC:integral component of membrane;MF:polysaccharide binding;MF:ATP binding;MF:protein kinase activity;	------	------	------	------	COG0515	T:Signal transduction mechanisms	XP_010315122.1	rust resistance kinase Lr10-like [Solanum lycopersicum]	sp|P93604|LRK10_WHEAT;	Rust resistance kinase Lr10 OS=Triticum aestivum OX=4565 GN=LRK10 PE=2 SV=1;	PF00069.27;PF07714.19	Pkinase;PK_Tyr_Ser-Thr	Protein kinase domain;Protein tyrosine and serine/threonine kinase
gene_Solyc01g008600.5	Solyc01g008600.5	Zinc finger CCCH domain-containing protein 55 (AHRD V3.11 *** tr|A0A2G3DF68|A0A2G3DF68_CAPCH)	7.38	9.82	24.74	6.94	14.31	4.66	11.62	4.56	15.19	15.58	51.02	31.36	13.98	8.63667	10.4567	32.6533	GO:0046872;GO:0003723;GO:000367	MF:metal ion binding;MF:RNA binding;MF:DNA binding;	------	------	------	------	ENOG411182H	S:Function unknown	XP_004228513.1	zinc finger CCCH domain-containing protein 46-like isoform X2 [Solanum lycopersicum]	sp|Q0D3J9|C3H53_ORYSJ;	Zinc finger CCCH domain-containing protein 53 OS=Oryza sativa subsp. japonica OX=39947 GN=Os07g0682400 PE=2 SV=1;	PF00642.26;PF00076.24;PF16131.7	zf-CCCH;RRM_1;Torus	Zinc finger C-x8-C-x5-C-x3-H type;RNA recognition motif.;Torus domain
gene_Solyc01g008620.5	Solyc01g008620.5	Glucan endo-1,3-beta-glucosidase (AHRD V3.11 *** tr|A0A1U8FGD7|A0A1U8FGD7_CAPAN)	38.18	22.76	19.41	44.07	10.84	40.15	19.66	35.33	9.73	9.49	7.21	4.95	26.7833	31.6867	21.5733	7.21667	GO:0005975;GO:0006952;GO:0005615;GO:0046658;GO:0004553;GO:004297	BP:carbohydrate metabolic process;BP:defense response;CC:extracellular space;CC:anchored component of plasma membrane;MF:hydrolase activity, hydrolyzing O-glycosyl compounds;MF:glucan endo-1,3-beta-D-glucosidase activity;	------	------	------	------	ENOG410YAHP;ENOG410YARB	G:Carbohydrate transport and metabolism;S:Function unknown	NP_001234798.2	glucan endo-1,3-beta-glucosidase A precursor [Solanum lycopersicum]	sp|Q01412|E13A_SOLLC;	Glucan endo-1,3-beta-glucosidase A OS=Solanum lycopersicum OX=4081 PE=1 SV=1;	PF00332.20	Glyco_hydro_17	Glycosyl hydrolases family 17
gene_Solyc01g008940.2	Solyc01g008940.2	Unknown protein	26.88	25.54	18.15	21.65	19.03	35.32	26.27	32.72	20.72	10.22	10.76	8.23	23.5233	25.3333	26.57	9.73667	------	------	------	------	------	------	------	------	KAG5629088.1	hypothetical protein H5410_000805 [Solanum commersonii]	------	------	------	------	------
gene_Solyc01g009340.5	Solyc01g009340.5	Protein IQ-domain 14-like (AHRD V3.11 *** tr|A0A2K3PR21|A0A2K3PR21_TRIPR)	8.12	7.6	10.86	4.83	8.52	5.71	6.48	4.09	8.21	8.43	16.08	15.84	8.86	6.35333	6.26	13.45	GO:000551	MF:calmodulin binding;	------	------	------	------	------	------	XP_010327634.1	protein IQ-DOMAIN 14-like [Solanum lycopersicum]	sp|F4JHN2|IQD17_ARATH;	Protein IQ-DOMAIN 17 OS=Arabidopsis thaliana OX=3702 GN=IQD17 PE=1 SV=1;	PF13178.8;PF00612.29	DUF4005;IQ	Protein of unknown function;IQ calmodulin-binding motif
gene_Solyc01g009690.3	Solyc01g009690.3	SC0A (AHRD V3.3 *** Q9ZS79_SOLLC)	4.65	3.47	4.22	7.41	1.81	4.92	5.22	11.41	2.99	1.26	1.98	0.73	4.11333	4.71333	6.54	1.32333	GO:0016021;GO:0005886;GO:000551	CC:integral component of membrane;CC:plasma membrane;MF:protein binding;	------	------	------	------	COG4886	S:Function unknown	XP_004228442.1	receptor-like protein Cf-9 homolog isoform X1 [Solanum lycopersicum]	sp|O49879|CF0_SOLLC;	Receptor-like protein Cf-9 homolog OS=Solanum lycopersicum OX=4081 GN=HCR9-0 PE=2 SV=2;	PF13855.8;PF12799.9;PF00560.35;PF08263.14	LRR_8;LRR_4;LRR_1;LRRNT_2	Leucine rich repeat;Leucine Rich repeats;Leucine Rich Repeat;Leucine rich repeat N-terminal domain
gene_Solyc01g009700.3	Solyc01g009700.3	NL0E (AHRD V3.3 *** Q9ZS81_SOLLC)	5.59	3.96	3.43	8.54	2.56	5.2	6.83	12.78	4.45	2.63	2.53	1.11	4.32667	5.43333	8.02	2.09	GO:0016021;GO:0005886;GO:000551	CC:integral component of membrane;CC:plasma membrane;MF:protein binding;	------	------	------	------	COG4886	S:Function unknown	CAA05272.1	Hcr9-9A [Solanum pimpinellifolium]	sp|Q40235|CF9_SOLPI;	Receptor-like protein Cf-9 OS=Solanum pimpinellifolium OX=4084 GN=CF-9 PE=1 SV=1;	PF13855.8;PF12799.9;PF00560.35;PF08263.14	LRR_8;LRR_4;LRR_1;LRRNT_2	Leucine rich repeat;Leucine Rich repeats;Leucine Rich Repeat;Leucine rich repeat N-terminal domain
gene_Solyc01g057320.3	Solyc01g057320.3	Kinesin (AHRD V3.3 *-* A0A200QSU4_9MAGN)	1.07	1.32	1.46	1.04	1.66	1.06	1.25	0.64	1.42	1.77	3.73	2.79	1.28333	1.25333	1.10333	2.76333	GO:0007018;GO:0005874;GO:0008574;GO:1990939;GO:0008017;GO:0003777;GO:000552	BP:microtubule-based movement;CC:microtubule;MF:ATP-dependent microtubule motor activity, plus-end-directed;MF:ATP-dependent microtubule motor activity;MF:microtubule binding;MF:microtubule motor activity;MF:ATP binding;	K10400	KIF15	------	------	COG5059	Z:Cytoskeleton	XP_004229119.1	kinesin-like protein KIN-12C isoform X1 [Solanum lycopersicum]	sp|Q27IK7|KN12C_ARATH;	Kinesin-like protein KIN-12C OS=Arabidopsis thaliana OX=3702 GN=KIN12C PE=1 SV=1;	PF00225.25;PF16796.7	Kinesin;Microtub_bd	Kinesin motor domain;Microtubule binding
gene_Solyc01g067020.4	Solyc01g067020.4	Atypical receptor-like kinase.1	8.79	8.06	8.24	29.77	11.34	20.89	19.62	31.78	11.32	7.1	6.84	2.85	8.36333	20.6667	20.9067	5.59667	GO:0006468;GO:0016021;GO:0005524;GO:000467	BP:protein phosphorylation;CC:integral component of membrane;MF:ATP binding;MF:protein kinase activity;	------	------	------	------	ENOG410Y9HF	T:Signal transduction mechanisms	NP_001234580.2	atypical receptor-like kinase 1 precursor [Solanum lycopersicum]	sp|Q9LP77|Y1848_ARATH;	Probable inactive receptor kinase At1g48480 OS=Arabidopsis thaliana OX=3702 GN=RKL1 PE=1 SV=1;	PF00069.27;PF07714.19;PF13855.8;PF08263.14;PF12799.9	Pkinase;PK_Tyr_Ser-Thr;LRR_8;LRRNT_2;LRR_4	Protein kinase domain;Protein tyrosine and serine/threonine kinase;Leucine rich repeat;Leucine rich repeat N-terminal domain;Leucine Rich repeats
gene_Solyc01g068380.3	Solyc01g068380.3	Purple acid phosphatase (AHRD V3.3 *** A0A2G2XQL8_CAPBA)	9.48	6.49	7.77	18.2	6.98	13.36	10.53	13.49	11.07	6.23	5.27	4.06	7.91333	12.8467	11.6967	5.18667	GO:0016021;GO:0016787;GO:0046872;GO:000399	CC:integral component of membrane;MF:hydrolase activity;MF:metal ion binding;MF:acid phosphatase activity;	K22390	ACP7	------	------	COG1409	S:Function unknown	XP_004229163.2	nucleotide pyrophosphatase/phosphodiesterase-like [Solanum lycopersicum]	sp|Q5MAU8|PPA27_ARATH;	Probable inactive purple acid phosphatase 27 OS=Arabidopsis thaliana OX=3702 GN=PAP27 PE=2 SV=1;	PF17808.3;PF00149.30;PF16656.7;PF14008.8	fn3_PAP;Metallophos;Pur_ac_phosph_N;Metallophos_C	Fn3-like domain from Purple Acid Phosphatase;Calcineurin-like phosphoesterase;Purple acid Phosphatase, N-terminal domain;Iron/zinc purple acid phosphatase-like protein C
gene_Solyc01g073970.3	Solyc01g073970.3	Histone H3 (AHRD V3.3 *** B3TM40_ELAGV)	0	0	0	0	0	0	0	0	0.17	0.87	1.01	2.81	0	0	0.056667	1.56333	GO:0010369;GO:0005634;GO:0000786;GO:0046982;GO:000367	CC:chromocenter;CC:nucleus;CC:nucleosome;MF:protein heterodimerization activity;MF:DNA binding;	K11253	H3	------	------	------	------	XP_004512510.2	LOW QUALITY PROTEIN: histone H3.2 [Cicer arietinum]	sp|P59226|H32_ARATH;	Histone H3.2 OS=Arabidopsis thaliana OX=3702 GN=HTR2 PE=1 SV=2;	PF00125.26;PF15511.8;PF15630.8	Histone;CENP-T_C;CENP-S	Core histone H2A/H2B/H3/H4;Centromere kinetochore component CENP-T histone fold;CENP-S protein
gene_Solyc01g080750.3	Solyc01g080750.3	ARM repeat superfamily protein (AHRD V3.3 *** A0A2U1P293_ARTAN)	15.2	15.85	28.06	8.2	14.72	6.37	11.97	6.13	11.65	11.37	28.68	30.05	19.7033	9.76333	9.91667	23.3667	GO:0000226;GO:0005881;GO:000801	BP:microtubule cytoskeleton organization;CC:cytoplasmic microtubule;MF:microtubule binding;	------	------	------	------	ENOG410XSBP;ENOG411000D	S:Function unknown;	XP_004229496.1	TOG array regulator of axonemal microtubules protein 1 [Solanum lycopersicum]	sp|Q6A070|TGRM1_MOUSE;	TOG array regulator of axonemal microtubules protein 1 OS=Mus musculus OX=10090 GN=Togaram1 PE=1 SV=3;	PF12348.10	CLASP_N	CLASP N terminal
gene_Solyc01g086800.4	Solyc01g086800.4	Histone H3 (AHRD V3.3 *** B6SYV0_MAIZE)	0	0	0	0	0.14	0	0	0	0.16	3.4	2.81	5.25	0	0.046667	0.053333	3.82	GO:0010369;GO:0005634;GO:0000786;GO:0046982;GO:000367	CC:chromocenter;CC:nucleus;CC:nucleosome;MF:protein heterodimerization activity;MF:DNA binding;	K11253	H3	------	------	------	------	XP_004512510.2	LOW QUALITY PROTEIN: histone H3.2 [Cicer arietinum]	sp|P59226|H32_ARATH;	Histone H3.2 OS=Arabidopsis thaliana OX=3702 GN=HTR2 PE=1 SV=2;	PF00125.26;PF15715.7	Histone;PAF	Core histone H2A/H2B/H3/H4;PCNA-associated factor histone like domain
gene_Solyc01g087070.4	Solyc01g087070.4	ADP,ATP carrier protein, mitochondrial (AHRD V3.3 *** A0A2U1N934_ARTAN)	2.61	2.2	2.23	1.66	1.44	2.18	1.75	2.85	1.6	0.7	0.64	0.79	2.34667	1.76	2.06667	0.71	GO:0140021;GO:1990544;GO:0005743;GO:0016021;GO:000547	BP:mitochondrial ADP transmembrane transport;BP:mitochondrial ATP transmembrane transport;CC:mitochondrial inner membrane;CC:integral component of membrane;MF:AT;	K05863	SLC25A4S, ANT	------	------	ENOG410XNW0	U:Intracellular trafficking, secretion, and vesicular transport	XP_004229620.1	ADP,ATP carrier protein 1, mitochondrial [Solanum lycopersicum]	sp|P25083|ADT1_SOLTU;	ADP,ATP carrier protein, mitochondrial OS=Solanum tuberosum OX=4113 GN=ANT PE=2 SV=1;	PF00153.29	Mito_carr	Mitochondrial carrier protein
gene_Solyc01g088300.3	Solyc01g088300.3	Germin-like protein subfamily.1	14.05	10.42	13.76	5.58	14.8	13.17	13.08	8.47	13.35	25.3	18.68	25.8	12.7433	11.1833	11.6333	23.26	GO:0048046;GO:0005618;GO:0030145;GO:004573	CC:apoplast;CC:cell wall;MF:manganese ion binding;MF:nutrient reservoir activity;	------	------	------	------	ENOG410YPZ1	S:Function unknown	XP_004229689.1	germin-like protein subfamily 1 member 17 [Solanum lycopersicum]	sp|Q9SFF9|GL17_ARATH;	Germin-like protein subfamily 1 member 7 OS=Arabidopsis thaliana OX=3702 GN=At3g05950 PE=2 SV=1;	PF00190.24;PF07883.13	Cupin_1;Cupin_2	Cupin;Cupin domain
gene_Solyc01g089890.4	Solyc01g089890.4	PRA1 family protein (AHRD V3.11 *** tr|A0A2G3AMA6|A0A2G3AMA6_CAPAN)	12.95	12.98	13.08	28.51	19.34	20.33	27.57	42.65	13.33	6.34	7.5	3.22	13.0033	22.7267	27.85	5.68667	GO:001602	CC:integral component of membrane;	K20359	RABAC1, PRAF1	------	------	ENOG4111C7K	S:Function unknown	TMW90755.1	hypothetical protein EJD97_015307 [Solanum chilense]	------	------	PF03208.21	PRA1	PRA1 family protein
gene_Solyc01g094380.2	Solyc01g094380.2	O-glucosyltransferase rumi-like protein (AHRD V3.3 *** A0A1J3GP63_NOCCA)	2.77	1.2	2.43	1.3	2.44	1.42	2.9	1.11	2.62	5.38	4.78	6.22	2.13333	1.72	2.21	5.46	GO:0016021;GO:001674	CC:integral component of membrane;MF:transferase activity;	------	------	------	------	ENOG410XT5U	S:Function unknown	XP_010326254.1	O-glucosyltransferase rumi homolog [Solanum lycopersicum]	sp|Q8T045|RUMI_DROME;	O-glucosyltransferase rumi OS=Drosophila melanogaster OX=7227 GN=rumi PE=1 SV=1;	PF05686.14	Glyco_transf_90	Glycosyl transferase family 90
gene_Solyc01g095530.2	Solyc01g095530.2	hypothetical protein (AHRD V3.3 *-* AT5G41761.1)	21.78	20.28	35.46	30.57	11.16	7.28	43.89	24.55	27.65	64.77	231.82	57.52	25.84	16.3367	32.03	118.037	------	------	------	------	------	------	ENOG410ZCA0	S:Function unknown	XP_010326840.1	uncharacterized protein LOC104649409 [Solanum lycopersicum]	------	------	------	------	------
gene_Solyc01g097280.3	Solyc01g097280.3	Pathogenesis-related protein 4b (AHRD V3.11 *** tr|A0A0H3TYE5|A0A0H3TYE5_CAPAN)	8.94	5.14	7.83	12.63	17.07	19.3	11.93	4.17	11.3	26.41	44.27	26.11	7.30333	16.3333	9.13333	32.2633	GO:0050832;GO:0042742;GO:0004540;GO:000806	BP:defense response to fungus;BP:defense response to bacterium;MF:ribonuclease activity;MF:chitin binding;	------	------	------	------	COG3979	G:Carbohydrate transport and metabolism	XP_004230092.1	wound-induced protein WIN1 [Solanum lycopersicum]	sp|P09761|WIN1_SOLTU;	Wound-induced protein WIN1 OS=Solanum tuberosum OX=4113 GN=WIN1 PE=2 SV=1;	PF00967.19;PF00187.21	Barwin;Chitin_bind_1	Barwin family;Chitin recognition protein
gene_Solyc01g098400.3	Solyc01g098400.3	Histidine phosphotransfer protein (AHRD V3.3 *** A0A0A1WCB7_NICAT)	2.38	3.67	4.24	2.8	7.76	1.4	4.2	0.78	4.59	5.81	45.51	17.84	3.43	3.98667	3.19	23.0533	GO:0009736;GO:0016310;GO:0000160;GO:0005737;GO:0005829;GO:0005634;GO:0009927;GO:004342	BP:cytokinin-activated signaling pathway;BP:phosphorylation;BP:phosphorelay signal transduction system;CC:cytoplasm;CC:cytosol;CC:nucleus;MF:histidine phosphotransfer kinase activity;MF:protein histidine kinase binding;	K14490	AHP	map04075	Plant hormone signal transduction	COG2198	T:Signal transduction mechanisms	XP_004230155.1	histidine-containing phosphotransfer protein 1 [Solanum lycopersicum]	sp|Q9ZNV9|AHP1_ARATH;	Histidine-containing phosphotransfer protein 1 OS=Arabidopsis thaliana OX=3702 GN=AHP1 PE=1 SV=1;	PF01627.25	Hpt	Hpt domain
gene_Solyc01g098570.2	Solyc01g098570.2	FANTASTIC four-like protein (DUF3049) (AHRD V3.3 *-* F4HX10_ARATH)	20.52	15.2	10.7	16.19	15.47	16	12.92	20.92	20.51	5.99	4.91	5.86	15.4733	15.8867	18.1167	5.58667	------	------	------	------	------	------	ENOG41113Z9	S:Function unknown	XP_004230162.1	protein FANTASTIC FOUR 3 [Solanum lycopersicum]	------	------	PF11250.10	FAF	Fantastic Four meristem regulator
gene_Solyc01g098590.3	Solyc01g098590.3	Phosphoglycerate mutase-like protein AT74 (AHRD V3.3 *** A0A2G2YZL9_CAPAN)	101.81	61.32	95.64	179.25	79.97	124.25	90.82	152.77	75.36	49.22	48.22	36.75	86.2567	127.823	106.317	44.73	GO:0003824;GO:001679	MF:catalytic activity;MF:phosphatase activity;	------	------	------	------	ENOG4111HP2	T:Signal transduction mechanisms	XP_004230164.1	phosphoglycerate mutase-like protein AT74 [Solanum lycopersicum]	sp|Q9MAA2|AT74_ARATH;	Phosphoglycerate mutase-like protein AT74 OS=Arabidopsis thaliana OX=3702 GN=At3g05170 PE=2 SV=1;	PF00300.24	His_Phos_1	Histidine phosphatase superfamily
gene_Solyc01g103960.3	Solyc01g103960.3	RNA helicase DEAH-box15	2.56	2.28	4.25	2.1	3.45	2.07	2.9	1.28	3.05	3.51	6.36	5.77	3.03	2.54	2.41	5.21333	GO:0006310;GO:0006281;GO:0032508;GO:0000724;GO:0070417;GO:0006260;GO:0071215;GO:0006268;GO:0005737;GO:0005694;GO:0005622;GO:0009506;GO:0005634;GO:0009378;GO:0016787;GO:0003676;GO:0043138;GO:000552	BP:DNA recombination;BP:DNA repair;BP:DNA duplex unwinding;BP:double-strand break repair via homologous recombination;BP:cellular response to cold;BP:DNA replication;BP:cellular response to abscisic acid stimulus;BP:DNA unwinding involved in DNA replication;CC:cytoplasm;CC:chromosome;CC:intracellular;CC:plasmodesma;CC:nucleus;MF:four-way junction helicase activity;MF:hydrolase activity;MF:nucleic…	K10901	BLM, RECQL3, SGS1	map03440	Homologous recombination	COG0514	L:Replication, recombination and repair	XP_004231337.1	ATP-dependent DNA helicase Q-like 4A [Solanum lycopersicum]	sp|Q8L840|RQL4A_ARATH;	ATP-dependent DNA helicase Q-like 4A OS=Arabidopsis thaliana OX=3702 GN=RECQL4A PE=2 SV=1;	PF09382.12;PF00271.33;PF00270.31;PF16124.7;PF00570.25;PF04851.17	RQC;Helicase_C;DEAD;RecQ_Zn_bind;HRDC;ResIII	RQC domain;Helicase conserved C-terminal domain;DEAD/DEAH box helicase;RecQ zinc-binding;HRDC domain;Type III restriction enzyme, res subunit
gene_Solyc01g104110.5	Solyc01g104110.5	11-S seed storage protein (AHRD V3.11 *** tr|A0A2U1KM33|A0A2U1KM33_ARTAN)	0	0	0.06	0.1	0	0.05	0	0	0.05	0.5	0.61	0.4	0.02	0.05	0.016667	0.503333	GO:004573	MF:nutrient reservoir activity;	------	------	------	------	ENOG41115JH	S:Function unknown	XP_019067358.1	12S seed storage protein CRD [Solanum lycopersicum]	sp|A0A222NNM9|COS1_COCNU;	Cocosin 1 OS=Cocos nucifera OX=13894 GN=COS-1 PE=1 SV=1;	PF00190.24	Cupin_1	Cupin
gene_Solyc01g104770.4	Solyc01g104770.4	Actin-related protein (AHRD V3.3 *** A0A200RCC6_9MAGN)	41.44	44.74	57.31	72.16	29.99	51.16	55.17	65.87	44	21.81	26.92	21.42	47.83	51.1033	55.0133	23.3833	GO:0005856;GO:0005737;GO:000552	CC:cytoskeleton;CC:cytoplasm;MF:ATP binding;	K10355	ACTF	------	------	COG5277	Z:Cytoskeleton	NP_001309931.1	actin [Solanum lycopersicum]	sp|P30173|ACT13_SOLTU;	Actin-101 OS=Solanum tuberosum OX=4113 GN=AC101 PE=3 SV=1;	PF00022.21	Actin	Actin
gene_Solyc01g105070.3	Solyc01g105070.3	LECEVI16G peroxidase precursor	19.22	18.99	15.15	11.78	7.24	10.86	5.53	9.23	5.14	3.41	3.21	2.41	17.7867	9.96	6.63333	3.01	GO:0006979;GO:0042744;GO:0055114;GO:0016021;GO:0005576;GO:0009505;GO:0009506;GO:0020037;GO:0046872;GO:000460	BP:response to oxidative stress;BP:hydrogen peroxide catabolic process;BP:oxidation-reduction process;CC:integral component of membrane;CC:extracellular region;CC:plant-type cell wall;CC:plasmodesma;MF:heme binding;MF:metal ion binding;MF:peroxidase activity;	K00430	E1.11.1.7	map00940	Phenylpropanoid biosynthesis	ENOG4111ADF	I:Lipid transport and metabolism	NP_001233970.2	peroxidase [Solanum lycopersicum]	sp|Q9XIV8|PERN1_TOBAC;	Peroxidase N1 OS=Nicotiana tabacum OX=4097 GN=poxN1 PE=1 SV=1;	PF00141.25	peroxidase	Peroxidase
gene_Solyc01g106500.4	Solyc01g106500.4	Receptor-like protein kinase (AHRD V3.3 *** A0A2R6Q659_ACTCH)	2.82	2.19	1.86	4.03	1.64	3.12	3.48	4.52	2.52	1.64	1.49	0.91	2.29	2.93	3.50667	1.34667	GO:0016021;GO:0005886;GO:0033612;GO:0004672;GO:0004674;GO:0005515;GO:000552	CC:integral component of membrane;CC:plasma membrane;MF:receptor serine/threonine kinase binding;MF:protein kinase activity;MF:protein serine/threonine kinase activity;MF:protein binding;MF:ATP binding;	------	------	------	------	COG4886	S:Function unknown	XP_004230660.1	receptor-like protein kinase 7 [Solanum lycopersicum]	sp|F4I2N7|RLK7_ARATH;	Receptor-like protein kinase 7 OS=Arabidopsis thaliana OX=3702 GN=RLK7 PE=1 SV=1;	PF13855.8;PF12799.9;PF08263.14	LRR_8;LRR_4;LRRNT_2	Leucine rich repeat;Leucine Rich repeats;Leucine rich repeat N-terminal domain
gene_Solyc01g107460.3	Solyc01g107460.3	Neuronal PAS domain protein (AHRD V3.11 *** tr|A0A1P8BBZ0|A0A1P8BBZ0_ARATH)	16.1	14.12	24.51	16.51	2.36	5.84	39.61	68.9	46.09	27.47	29.38	14.6	18.2433	8.23667	51.5333	23.8167	------	------	------	------	------	------	ENOG410YB32	S:Function unknown	XP_004230726.1	uncharacterized protein LOC101248432 [Solanum lycopersicum]	------	------	------	------	------
gene_Solyc01g108710.3	Solyc01g108710.3	Unknown protein	0	0	0	1.16	0	0	0	0.38	0	17.88	28.6	9.26	0	0.386667	0.126667	18.58	GO:001602	CC:integral component of membrane;	------	------	------	------	------	------	KAG5625079.1	hypothetical protein H5410_010297 [Solanum commersonii]	------	------	------	------	------
gene_Solyc01g109110.3	Solyc01g109110.3	Extra-large guanine nucleotide-binding protein 2 (AHRD V3.3 *** A0A1U8DXD5_CAPAN)	15.63	12.57	9.14	34.33	24.23	31.01	21.68	31.99	15.36	12.12	10.39	7.87	12.4467	29.8567	23.01	10.1267	GO:0006203;GO:0007188;GO:0042742;GO:0007186;GO:0005834;GO:0005634;GO:0031683;GO:0003924;GO:0019001;GO:0001664;GO:0008832;GO:000552	BP:dGTP catabolic process;BP:adenylate cyclase-modulating G-protein coupled receptor signaling pathway;BP:defense response to bacterium;BP:G-protein coupled receptor signaling pathway;CC:heterotrimeric G-protein complex;CC:nucleus;MF:G-protein beta/gamma-subunit complex binding;MF:GTPase activity;MF:guanyl nucleotide binding;MF:G-protein coupled receptor binding;MF:dGTPase activity;MF:GTP binding;	------	------	------	------	ENOG410XNVQ	S:Function unknown	XP_004230840.1	extra-large guanine nucleotide-binding protein 1-like [Solanum lycopersicum]	sp|O80462|XLG1_ARATH;	Extra-large guanine nucleotide-binding protein 1 OS=Arabidopsis thaliana OX=3702 GN=XLG1 PE=1 SV=2;	PF00503.22	G-alpha	G-protein alpha subunit
gene_Solyc01g150176.2	Solyc01g150176.2	Gibberellin regulated protein (AHRD V3.11 *** tr|A0A200Q364|A0A200Q364_9MAGN)	567.68	564.18	515.49	1020.04	403.04	1115.98	668.39	960.82	701.75	273.46	189.9	120.19	549.117	846.353	776.987	194.517	GO:0006952;GO:0005618;GO:000557	BP:defense response;CC:cell wall;CC:extracellular region;	------	------	------	------	ENOG410YWQ9	O:Posttranslational modification, protein turnover, chaperones	NP_001307142.1	snakin-2 precursor [Solanum lycopersicum]	sp|Q93X17|SNAK2_SOLTU;	Snakin-2 OS=Solanum tuberosum OX=4113 GN=SN2 PE=1 SV=1;	PF02704.16	GASA	Gibberellin regulated protein
gene_Solyc01g162440.1	Solyc01g162440.1	B3 domain-containing protein (AHRD V3.11 *** tr|A0A1Q3BBR1|A0A1Q3BBR1_CEPFO)	5.94	3.55	4.35	4.67	3.74	3.58	4.88	5.41	5.65	0.92	1.26	0.58	4.61333	3.99667	5.31333	0.92	GO:0005634;GO:000367	CC:nucleus;MF:DNA binding;	------	------	------	------	ENOG410YWR9	S:Function unknown	XP_015080050.1	B3 domain-containing protein Os04g0386900-like [Solanum pennellii]	------	------	------	------	------
gene_Solyc01g162470.1	Solyc01g162470.1	B3 domain-containing protein Os04g0386900-like (AHRD V3.11 *-* XP_019068745.1)	1.2	1.17	1.53	1.68	1.47	1.23	1.13	1.88	1.7	0.47	0.62	0.24	1.3	1.46	1.57	0.443333	GO:0005634;GO:0016021;GO:000367	CC:nucleus;CC:integral component of membrane;MF:DNA binding;	------	------	------	------	ENOG410YWR9	S:Function unknown	XP_015080050.1	B3 domain-containing protein Os04g0386900-like [Solanum pennellii]	------	------	------	------	------
gene_Solyc01g162830.1	Solyc01g162830.1	Nicotianamine synthase (AHRD V3.11 *** sp|Q9XGI7|NAS_SOLLC)	0.82	1.41	2.34	3.43	0.98	2.71	2.07	3.21	2.04	0.44	1.04	0.41	1.52333	2.37333	2.44	0.63	GO:0030418;GO:003041	BP:nicotianamine biosynthetic process;MF:nicotianamine synthase activity;	K05953	NAS	map00270;map00999	Cysteine and methionine metabolism;Biosynthesis of various plant secondary metabolites	ENOG4111NF0	E:Amino acid transport and metabolism	NP_001296307.1	nicotianamine synthase [Solanum lycopersicum]	sp|Q9XGI7|NAS_SOLLC;	Nicotianamine synthase OS=Solanum lycopersicum OX=4081 GN=CHLN PE=2 SV=1;	PF03059.18;PF13847.8	NAS;Methyltransf_31	Nicotianamine synthase protein;Methyltransferase domain
gene_Solyc02g031730.1	Solyc02g031730.1	Histone-lysine N-methyltransferase ATXR2 (AHRD V3.3 *-* A0A2G2Z378_CAPAN)	7.44	9.08	6.14	1.25	0.2	0.72	1.19	1.2	0.77	0.02	0.05	0.08	7.55333	0.723333	1.05333	0.05	------	------	------	------	------	------	------	------	XP_025885536.1	uncharacterized protein LOC112940978 [Solanum lycopersicum]	------	------	------	------	------
gene_Solyc02g032660.3	Solyc02g032660.3	Protein DETOXIFICATION (AHRD V3.3 *** A0A328DGG9_9ASTE)	52.9	54.1	48.7	50.45	25.87	59.89	36.93	65.46	38.94	21.1	18.05	10.56	51.9	45.4033	47.11	16.57	GO:0006855;GO:0055085;GO:0016021;GO:0016020;GO:0015297;GO:0015238;GO:0022857;GO:004291	BP:drug transmembrane transport;BP:transmembrane transport;CC:integral component of membrane;CC:membrane;MF:antiporter activity;MF:drug transmembrane transporter activity;MF:transmembrane transporter activity;MF:xenobiotic transporter activity;	K03327	TC.MATE, SLC47A, norM, mdtK, dinF	------	------	COG0534	V:Defense mechanisms	XP_004231608.1	protein DETOXIFICATION 40 [Solanum lycopersicum]	sp|Q9LVD9|DTX40_ARATH;	Protein DETOXIFICATION 40 OS=Arabidopsis thaliana OX=3702 GN=DTX40 PE=1 SV=1;	PF01554.20	MatE	MatE
gene_Solyc02g062170.3	Solyc02g062170.3	Chalcone-flavanone isomerase family protein (AHRD V3.3 *-* AT5G66230.1)	4.52	4.48	7.89	2.54	5.05	2.07	3.75	2.32	4.48	4.45	9.45	9.5	5.63	3.22	3.51667	7.8	------	------	------	------	------	------	ENOG410ZCUP	S:Function unknown	XP_004233555.1	uncharacterized protein LOC101251248 [Solanum lycopersicum]	------	------	------	------	------
gene_Solyc02g062815.1	Solyc02g062815.1	transcription initiation factor TFIID subunit (AHRD V3.3 *-* AT5G65540.1)	0	0	0.8	0.45	0.7	0.46	0	0	0.08	3.91	1.97	1.84	0.266667	0.536667	0.026667	2.57333	GO:004698	MF:protein heterodimerization activity;	------	------	------	------	ENOG4111PBB	S:Function unknown	XP_025884124.1	uncharacterized protein LOC112940342 [Solanum lycopersicum]	------	------	------	------	------
gene_Solyc02g066980.1	Solyc02g066980.1	TPX2 (Targeting protein for Xklp2) protein family (AHRD V3.3 *** F4K9T9_ARATH)	0.28	0.23	0.57	0.19	0.41	0.24	0.29	0.28	0.17	0.6	1.04	1.54	0.36	0.28	0.246667	1.06	GO:0060236;GO:0032147;GO:0090307;GO:0005737;GO:0072686;GO:0005819;GO:0005880;GO:0005874;GO:0008017;GO:003029	BP:regulation of mitotic spindle organization;BP:activation of protein kinase activity;BP:mitotic spindle assembly;CC:cytoplasm;CC:mitotic spindle;CC:spindle;CC:nuclear microtubule;CC:microtubule;MF:microtubule binding;MF:protein kinase activator activity;	------	------	------	------	ENOG410YD2P	S:Function unknown	XP_010317121.1	axoneme-associated protein mst101(2)-like isoform X1 [Solanum lycopersicum]	sp|F4I2H7|TPX2_ARATH;	Protein TPX2 OS=Arabidopsis thaliana OX=3702 GN=TPX2 PE=1 SV=1;	PF06886.13	TPX2	Targeting protein for Xklp2
gene_Solyc02g066990.3	Solyc02g066990.3	Proline-rich protein 21 (AHRD V3.11 *-* tr|A0A2U1KA99|A0A2U1KA99_ARTAN)	0.08	0	0.11	0	0	0.05	0.08	0	0	0.13	1.09	0.65	0.063333	0.016667	0.026667	0.623333	GO:007030	MF:phosphatidic acid binding;	------	------	------	------	------	------	XP_004233381.2	uncharacterized protein At5g39570-like [Solanum lycopersicum]	------	------	------	------	------
gene_Solyc02g067050.3	Solyc02g067050.3	UPF03.1	86.67	142.68	95.61	92.65	92.46	164.37	43.58	38.02	31.9	15.75	15.54	8.88	108.32	116.493	37.8333	13.39	------	------	------	------	------	------	ENOG410Y35P	S:Function unknown	XP_004233379.1	uncharacterized protein LOC101247689 [Solanum lycopersicum]	sp|Q64UM6|Y2056_BACFR;	UPF0301 protein BF2056 OS=Bacteroides fragilis;	PF02622.17	DUF179	Uncharacterized ACR, COG1678
gene_Solyc02g068670.3	Solyc02g068670.3	Ankyrin repeat (AHRD V3.3 *** A0A200R0Y6_9MAGN)	1.14	0.56	0.6	2.45	0.78	1.62	1.5	2.17	0.94	0.46	0.78	0.4	0.766667	1.61667	1.53667	0.546667	GO:0016021;GO:001602	CC:integral component of membrane;CC:membrane;	------	------	------	------	COG0666	S:Function unknown	XP_010317038.1	ankyrin repeat-containing protein At5g02620-like isoform X1 [Solanum lycopersicum]	sp|Q9C7A2|ITN1_ARATH;	Ankyrin repeat-containing protein ITN1 OS=Arabidopsis thaliana OX=3702 GN=ITN1 PE=1 SV=1;	PF13962.8;PF12796.9;PF13857.8	PGG;Ank_2;Ank_5	Domain of unknown function;Ankyrin repeats;Ankyrin repeats
gene_Solyc02g069110.5	Solyc02g069110.5	Cathepsin B-like cysteine proteinase (AHRD V3.11 *** tr|Q40413|Q40413_NICRU)	0	0.05	0	0	0.05	0	0	0	0.05	6.48	3	10.38	0.016667	0.016667	0.016667	6.62	GO:0051603;GO:0050790;GO:0006508;GO:0005615;GO:0005764;GO:0004197;GO:000823	BP:proteolysis involved in cellular protein catabolic process;BP:regulation of catalytic activity;BP:proteolysis;CC:extracellular space;CC:lysosome;MF:cysteine-type endopeptidase activity;MF:cysteine-type peptidase activity;	K01363	CTSB	------	------	COG4870	O:Posttranslational modification, protein turnover, chaperones	XP_004233222.1	cathepsin B-like protease 2 [Solanum lycopersicum]	sp|Q93VC9|CATB2_ARATH;	Cathepsin B-like protease 2 OS=Arabidopsis thaliana OX=3702 GN=CATHB2 PE=2 SV=1;	PF00112.25;PF08127.15	Peptidase_C1;Propeptide_C1	Papain family cysteine protease;Peptidase family C1 propeptide
gene_Solyc02g070280.3	Solyc02g070280.3	Cationic amino acid transporter (AHRD V3.3 *** S8D7Y4_9LAMI)	17.95	14.01	12.76	39.46	17.93	37.81	33.8	49.13	23.94	16.73	14.77	8.72	14.9067	31.7333	35.6233	13.4067	GO:0051938;GO:0006865;GO:0055085;GO:0016020;GO:0016021;GO:0005886;GO:0005313;GO:0022857;GO:0015189;GO:001517	BP:L-glutamate import;BP:amino acid transport;BP:transmembrane transport;CC:membrane;CC:integral component of membrane;CC:plasma membrane;MF:L-glutamate transmembrane transporter activity;MF:transmembrane transporter activity;MF:L-lysine transmembrane transporter activity;MF:amino acid transmembrane transporter activity;	K03294	TC.APA	------	------	COG0531	E:Amino acid transport and metabolism	XP_004233142.1	cationic amino acid transporter 1 [Solanum lycopersicum]	sp|Q84MA5|CAAT1_ARATH;	Cationic amino acid transporter 1 OS=Arabidopsis thaliana OX=3702 GN=CAT1 PE=1 SV=1;	PF13520.8;PF00324.23;PF13906.8;PF03845.15	AA_permease_2;AA_permease;AA_permease_C;Spore_permease	Amino acid permease;Amino acid permease;C-terminus of AA_permease;Spore germination protein
gene_Solyc02g071090.3	Solyc02g071090.3	Purine permease (AHRD V3.3 *** A0A2U1LZ22_ARTAN),Pfam:PF16913	43.14	43.08	31.24	25.74	15.07	31.12	34.37	35.81	34.46	9.85	9.88	4.74	39.1533	23.9767	34.88	8.15667	GO:0016021;GO:001521	CC:integral component of membrane;MF:purine nucleoside transmembrane transporter activity;	------	------	------	------	ENOG4111D9S	U:Intracellular trafficking, secretion, and vesicular transport	XP_004233087.1	probable purine permease 10 [Solanum lycopersicum]	sp|O49725|PUP10_ARATH;	Probable purine permease 10 OS=Arabidopsis thaliana OX=3702 GN=PUP10 PE=2 SV=2;	PF16913.7	PUNUT	Purine nucleobase transmembrane transport
gene_Solyc02g071100.3	Solyc02g071100.3	Purine permease (AHRD V3.3 *** A0A2U1LZ22_ARTAN),Pfam:PF16913	11	13.9	12.81	14.07	9.5	18.56	16.12	12.83	14.34	6.59	8.06	5.52	12.57	14.0433	14.43	6.72333	GO:0016021;GO:001521	CC:integral component of membrane;MF:purine nucleoside transmembrane transporter activity;	------	------	------	------	ENOG4111D9S	U:Intracellular trafficking, secretion, and vesicular transport	XP_025885123.1	probable purine permease 10 [Solanum lycopersicum]	sp|O49725|PUP10_ARATH;	Probable purine permease 10 OS=Arabidopsis thaliana OX=3702 GN=PUP10 PE=2 SV=2;	PF16913.7	PUNUT	Purine nucleobase transmembrane transport
gene_Solyc02g071470.5	Solyc02g071470.5	2-oxoglutarate (2OG) and Fe(II)-dependent oxygenase superfamily protein (AHRD V3.11 *** tr|Q9SB33|Q9SB33_ARATH)	0.94	1.89	0.32	4.61	1.64	2.88	2.77	3.9	1.97	0.71	1.18	0.29	1.05	3.04333	2.88	0.726667	GO:0032259;GO:0031418;GO:0051213;GO:0008168;GO:0046872;GO:001649	BP:methylation;MF:L-ascorbic acid binding;MF:dioxygenase activity;MF:methyltransferase activity;MF:metal ion binding;MF:oxidoreductase activity;	------	------	------	------	COG3491	S:Function unknown	NP_001352380.1	protein SRG1-like [Solanum lycopersicum]	sp|Q39224|SRG1_ARATH;	Protein SRG1 OS=Arabidopsis thaliana OX=3702 GN=SRG1 PE=2 SV=1;	PF14226.8;PF03171.22	DIOX_N;2OG-FeII_Oxy	non-haem dioxygenase in morphine synthesis N-terminal;2OG-F
gene_Solyc02g071560.5	Solyc02g071560.5	Subtilisin-like protease (AHRD V3.11 *** tr|A0A2I0VHD6|A0A2I0VHD6_9ASPA)	0.67	0.66	0.3	9.27	2.15	5.58	2.79	3.76	1.17	0.23	0.7	0.14	0.543333	5.66667	2.57333	0.356667	GO:0006508;GO:000425	BP:proteolysis;MF:serine-type endopeptidase activity;	------	------	------	------	COG1404	O:Posttranslational modification, protein turnover, chaperones	XP_004232982.1	subtilisin-like protease SBT5.6 [Solanum lycopersicum]	sp|Q9FK76|SBT56_ARATH;	Subtilisin-like protease SBT5.6 OS=Arabidopsis thaliana OX=3702 GN=SBT5.6 PE=2 SV=1;	PF00082.24;PF17766.3;PF05922.18	Peptidase_S8;fn3_6;Inhibitor_I9	Subtilase family;Fibronectin type-III domain;Peptidase inhibitor I9
gene_Solyc02g071970.1	Solyc02g071970.1	N66 matrix protein (AHRD V3.3 *** XP_004233072.1)	3.43	4.37	4.39	17.61	5.73	12.71	14.15	23.8	10.54	4.72	5.38	2.48	4.06333	12.0167	16.1633	4.19333	GO:001602	CC:integral component of membrane;	------	------	------	------	------	------	XP_004233072.1	N66 matrix protein [Solanum lycopersicum]	------	------	------	------	------
gene_Solyc02g072470.4	Solyc02g072470.4	Receptor-like protein kinase (AHRD V3.3 *** A0A2R6Q6W2_ACTCH)	4.89	4.29	3.88	6.16	2.88	5.82	4.68	7.67	3.47	2.29	2.87	1.91	4.35333	4.95333	5.27333	2.35667	GO:0006468;GO:0046777;GO:0016021;GO:0005886;GO:0004672;GO:0004674;GO:000552	BP:protein phosphorylation;BP:protein autophosphorylation;CC:integral component of membrane;CC:plasma membrane;MF:protein kinase activity;MF:protein serine/threonine kinase activity;MF:ATP binding;	K13420	FLS2	map04016;map04626	MAPK signaling pathway - plant;Plant-pathogen interaction	COG4886;COG0515	S:Function unknown;T:Signal transduction mechanisms	XP_010316829.1	probable LRR receptor-like serine/threonine-protein kinase At3g47570 [Solanum lycopersicum]	sp|C0LGP4|Y3475_ARATH;	Probable LRR receptor-like serine/threonine-protein kinase At3g47570 OS=Arabidopsis thaliana OX=3702 GN=At3g47570 PE=2 SV=1;	PF13855.8;PF00069.27;PF07714.19;PF12799.9;PF08263.14;PF03109.18	LRR_8;Pkinase;PK_Tyr_Ser-Thr;LRR_4;LRRNT_2;ABC1	Leucine rich repeat;Protein kinase domain;Protein tyrosine and serine/threonine kinase;Leucine Rich repeats;Leucine rich repeat N-terminal domain;ABC1 atypical kinase-like domain
gene_Solyc02g076980.5.1	Solyc02g076980.5.1	Cysteine protease-like protein (AHRD V3.3 *** Q9SG15_ARATH)	15.77	9.51	6.49	11.48	3.46	10.54	8.66	11.54	4.3	2.3	1.92	1.68	10.59	8.49333	8.16667	1.96667	GO:0006508;GO:0016021;GO:000823	BP:proteolysis;CC:integral component of membrane;MF:cysteine-type peptidase activity;	K13441	RCR3	map04626	Plant-pathogen interaction	COG4870	O:Posttranslational modification, protein turnover, chaperones	TMW88221.1	hypothetical protein EJD97_018894 [Solanum chilense]	sp|Q9FJ47|SAG12_ARATH;	Senescence-specific cysteine protease SAG12 OS=Arabidopsis thaliana OX=3702 GN=SAG12 PE=1 SV=1;	PF00112.25;PF08246.14;PF03051.17	Peptidase_C1;Inhibitor_I29;Peptidase_C1_2	Papain family cysteine protease;Cathepsin propeptide inhibitor domain;Peptidase C1-like family
gene_Solyc02g077040.4	Solyc02g077040.4	phytophthora-inhibited protease 1	110.17	67.92	81.41	287.53	66.04	144.44	147.53	261.57	73.79	48.5	56.13	24.78	86.5	166.003	160.963	43.1367	GO:0051603;GO:0006508;GO:0005615;GO:0016021;GO:0005764;GO:0004197;GO:000823	BP:proteolysis involved in cellular protein catabolic process;BP:proteolysis;CC:extracellular space;CC:integral component of membrane;CC:lysosome;MF:cysteine-type endopeptidase activity;MF:cysteine-type peptidase activity;	------	------	------	------	COG4870	O:Posttranslational modification, protein turnover, chaperones	NP_001233949.2	phytophthora-inhibited protease 1 [Solanum lycopersicum]	sp|Q9FJ47|SAG12_ARATH;	Senescence-specific cysteine protease SAG12 OS=Arabidopsis thaliana OX=3702 GN=SAG12 PE=1 SV=1;	PF00112.25;PF08246.14;PF03051.17	Peptidase_C1;Inhibitor_I29;Peptidase_C1_2	Papain family cysteine protease;Cathepsin propeptide inhibitor domain;Peptidase C1-like family
gene_Solyc02g077110.4	Solyc02g077110.4	Phospholipase A1-II 1 (AHRD V3.11 *** tr|A0A2G3AN96|A0A2G3AN96_CAPAN)	7.81	8.13	8.02	16.08	8.01	18.91	6.75	8.43	4.53	3.19	3.13	2.4	7.98667	14.3333	6.57	2.90667	GO:0016042;GO:000897	BP:lipid catabolic process;MF:phosphatidylcholine 1-acylhydrolase activity;	------	------	------	------	ENOG410YDU3	S:Function unknown	XP_004232957.2	phospholipase A1-II 1-like [Solanum lycopersicum]	sp|A2WT95|PLA1_ORYSI;	Phospholipase A1-II 1 OS=Oryza sativa subsp. indica OX=39946 GN=OsI_03083 PE=3 SV=2;	PF01764.27	Lipase_3	Lipase
gene_Solyc02g078150.5	Solyc02g078150.5	PDDEXK-like protein (AHRD V3.11 *** tr|A0A2U1QIN2|A0A2U1QIN2_ARTAN)	0.67	1.6	2.51	3.24	1.4	0.24	1.21	0.06	0.37	12.42	36.55	7.35	1.59333	1.62667	0.546667	18.7733	------	------	------	------	------	------	ENOG410YC9T	S:Function unknown	XP_004232883.1	uncharacterized protein LOC101251740 [Solanum lycopersicum]	------	------	PF04720.14	PDDEXK_6	PDDEXK-like family of unknown function
gene_Solyc02g078660.4	Solyc02g078660.4	Hydroxyproline-rich glycoprotein family protein (AHRD V3.3 *-* A0A1P8AWR9_ARATH)	1.26	0.85	0.48	1.37	0.61	1.88	0.88	1.4	0.68	0.37	0.25	0.13	0.863333	1.28667	0.986667	0.25	GO:0009658;GO:0016021;GO:000970	BP:chloroplast organization;CC:integral component of membrane;CC:chloroplast outer membrane;	------	------	------	------	ENOG410YIBW	S:Function unknown	XP_010316722.2	uncharacterized protein At4g04980 [Solanum lycopersicum]	sp|Q1PEB4|Y4498_ARATH;	Uncharacterized protein At4g04980 OS=Arabidopsis thaliana OX=3702 GN=At4g04980 PE=2 SV=1;	------	------	------
gene_Solyc02g079330.3	Solyc02g079330.3	Equilibrative nucleotide transporter like (AHRD V3.3 *** A0A2R6QTM2_ACTCH)	7.34	5.65	5.51	4.48	3.14	3.18	5.47	5.39	4.47	1.61	1.7	1.53	6.16667	3.6	5.11	1.61333	GO:0006817;GO:1901642;GO:0016021;GO:0005886;GO:000533	BP:phosphate ion transport;BP:nucleoside transmembrane transport;CC:integral component of membrane;CC:plasma membrane;MF:nucleoside transmembrane transporter activity;	K15014	SLC29A1_2_3, ENT1_2_3	------	------	ENOG410Y3MT	S:Function unknown	XP_004232785.1	equilibrative nucleotide transporter 3-like [Solanum lycopersicum]	sp|Q9M0Y3|ENT3_ARATH;	Equilibrative nucleotide transporter 3 OS=Arabidopsis thaliana OX=3702 GN=ENT3 PE=1 SV=1;	PF01733.20	Nucleoside_tran	Nucleoside transporter
gene_Solyc02g079350.3	Solyc02g079350.3	Equilibrative nucleotide transporter like (AHRD V3.3 *** A0A2R6QTM2_ACTCH)	3.63	3.75	1.82	3.55	1.09	3.33	1.77	2.71	2.25	0.23	0.27	0.44	3.06667	2.65667	2.24333	0.313333	GO:0006817;GO:1901642;GO:0016021;GO:0005886;GO:000533	BP:phosphate ion transport;BP:nucleoside transmembrane transport;CC:integral component of membrane;CC:plasma membrane;MF:nucleoside transmembrane transporter activity;	K15014	SLC29A1_2_3, ENT1_2_3	------	------	ENOG410Y3MT	S:Function unknown	XP_004232782.1	equilibrative nucleotide transporter 3-like [Solanum lycopersicum]	sp|Q9M0Y3|ENT3_ARATH;	Equilibrative nucleotide transporter 3 OS=Arabidopsis thaliana OX=3702 GN=ENT3 PE=1 SV=1;	PF01733.20	Nucleoside_tran	Nucleoside transporter
gene_Solyc02g080010.3	Solyc02g080010.3	Cysteine-rich receptor-like protein kinase 10 (AHRD V3.11 *** tr|A0A2G2XFS8|A0A2G2XFS8_CAPBA)	45.77	40.54	35.66	75.33	63.79	69.28	50.34	66.73	31.68	22.27	19.55	13.19	40.6567	69.4667	49.5833	18.3367	GO:0016021;GO:0016020;GO:0005524;GO:000467	CC:integral component of membrane;CC:membrane;MF:ATP binding;MF:protein kinase activity;	------	------	------	------	COG0515	T:Signal transduction mechanisms	XP_010316619.1	putative receptor-like protein kinase At4g00960 isoform X1 [Solanum lycopersicum]	sp|O65479|CRK20_ARATH;	Putative cysteine-rich receptor-like protein kinase 20 OS=Arabidopsis thaliana OX=3702 GN=CRK20 PE=2 SV=2;	PF07714.19;PF00069.27;PF01657.19;PF01636.25	PK_Tyr_Ser-Thr;Pkinase;Stress-antifung;APH	Protein tyrosine and serine/threonine kinase;Protein kinase domain;Salt stress response/antifungal;Phosphotransferase enzyme family
gene_Solyc02g080040.4	Solyc02g080040.4	Cysteine-rich receptor-like protein kinase 29 (AHRD V3.3 *** A0A2G2XFA8_CAPBA)	3.86	3.16	2.81	11.27	8.32	10.43	7.59	9.67	6.11	2.18	1.9	1.88	3.27667	10.0067	7.79	1.98667	GO:0006468;GO:0016021;GO:0005886;GO:0004672;GO:0004674;GO:000552	BP:protein phosphorylation;CC:integral component of membrane;CC:plasma membrane;MF:protein kinase activity;MF:protein serine/threonine kinase activity;MF:ATP binding;	------	------	------	------	COG0515	T:Signal transduction mechanisms	XP_025885209.1	cysteine-rich receptor-like protein kinase 10 [Solanum lycopersicum]	sp|Q8GYA4|CRK10_ARATH;	Cysteine-rich receptor-like protein kinase 10 OS=Arabidopsis thaliana OX=3702 GN=CRK10 PE=1 SV=3;	PF07714.19;PF00069.27;PF01636.25	PK_Tyr_Ser-Thr;Pkinase;APH	Protein tyrosine and serine/threonine kinase;Protein kinase domain;Phosphotransferase enzyme family
gene_Solyc02g080080.3	Solyc02g080080.3	Cysteine-rich receptor-like protein kinase 29 (AHRD V3.3 *** A0A2G2XFA8_CAPBA)	8.51	6.79	7.91	11.54	6.35	9.3	10.06	12.9	7.64	3.96	4.8	1.82	7.73667	9.06333	10.2	3.52667	GO:0006468;GO:0016021;GO:0016020;GO:0005886;GO:0004674;GO:0004672;GO:000552	BP:protein phosphorylation;CC:integral component of membrane;CC:membrane;CC:plasma membrane;MF:protein serine/threonine kinase activity;MF:protein kinase activity;MF:ATP binding;	------	------	------	------	COG0515	T:Signal transduction mechanisms	XP_010316618.1	putative receptor-like protein kinase At4g00960 isoform X1 [Solanum lycopersicum]	sp|Q8S9L6|CRK29_ARATH;	Cysteine-rich receptor-like protein kinase 29 OS=Arabidopsis thaliana OX=3702 GN=CRK29 PE=2 SV=1;	PF07714.19;PF00069.27;PF01657.19;PF01636.25;PF15102.8	PK_Tyr_Ser-Thr;Pkinase;Stress-antifung;APH;TMEM154	Protein tyrosine and serine/threonine kinase;Protein kinase domain;Salt stress response/antifungal;Phosphotransferase enzyme family;TMEM154 protein family
gene_Solyc02g080200.5	Solyc02g080200.5	Pectinesterase (AHRD V3.11 *** tr|A0A2G2VBJ7|A0A2G2VBJ7_CAPBA)	3.07	2.5	3.56	1.51	3.71	1.36	2.36	0.54	3.41	4.66	5.11	10.66	3.04333	2.19333	2.10333	6.81	GO:0042545;GO:0045490;GO:0005618;GO:0016021;GO:0005576;GO:0046910;GO:0030599;GO:0045330;GO:000485	BP:cell wall modification;BP:pectin catabolic process;CC:cell wall;CC:integral component of membrane;CC:extracellular region;MF:pectinesterase inhibitor activity;MF:pectinesterase activity;MF:aspartyl esterase activity;MF:enzyme inhibitor activity;	K01051	E3.1.1.11	map00040	Pentose and glucuronate interconversions	COG4677	G:Carbohydrate transport and metabolism	XP_004232737.1	pectinesterase [Solanum lycopersicum]	sp|Q1JPL7|PME18_ARATH;	Pectinesterase/pectinesterase inhibitor 18 OS=Arabidopsis thaliana OX=3702 GN=PME18 PE=1 SV=3;	PF01095.21;PF04043.17;PF12708.9	Pectinesterase;PMEI;Pectate_lyase_3	Pectinesterase;Plant invertase/pectin methylesterase inhibitor;Pectate lyase superfamily protein
gene_Solyc02g081970.4	Solyc02g081970.4	Vacuolar-sorting receptor.1	33.16	29.86	25.84	57.77	26.82	48.94	46.41	65.85	35.23	21.81	21.24	13.99	29.62	44.51	49.1633	19.0133	GO:0006896;GO:0006623;GO:0006511;GO:0005794;GO:0005802;GO:0016021;GO:0016020;GO:0005768;GO:0017119;GO:0061630;GO:000550	BP:Golgi to vacuole transport;BP:protein targeting to vacuole;BP:ubiquitin-dependent protein catabolic process;CC:Golgi apparatus;CC:trans-Golgi network;CC:integral component of membrane;CC:membrane;CC:endosome;CC:Golgi transport complex;MF:ubiquitin protein ligase activity;MF:calcium ion binding;	------	------	------	------	ENOG41105IF	U:Intracellular trafficking, secretion, and vesicular transport	XP_004232618.1	vacuolar-sorting receptor 6 [Solanum lycopersicum]	sp|Q9FYH7|VSR6_ARATH;	Vacuolar-sorting receptor 6 OS=Arabidopsis thaliana OX=3702 GN=VSR6 PE=2 SV=3;	PF02225.24;PF12662.9	PA;cEGF	PA domain;Complement Clr-like EGF-like
gene_Solyc02g082930.3	Solyc02g082930.3	acidic extracellular 27 kD chitinase	112.56	65.59	91.94	44.13	82.13	94.39	85.58	44.33	69.75	122.19	164.55	154.39	90.03	73.55	66.5533	147.043	GO:0006952;GO:0005975;GO:0016998;GO:0000272;GO:0050832;GO:0009607;GO:0006032;GO:0005615;GO:0005576;GO:000456	BP:defense response;BP:carbohydrate metabolic process;BP:cell wall macromolecule catabolic process;BP:polysaccharide catabolic process;BP:defense response to fungus;BP:response to biotic stimulus;BP:chitin catabolic process;CC:extracellular space;CC:extracellular region;MF:chitinase activity;	K20547	CHIB	map00520;map04016	Amino sugar and nucleotide sugar metabolism;MAPK signaling pathway - plant	COG3979	G:Carbohydrate transport and metabolism	NP_001234400.1	acidic 27 kDa endochitinase precursor [Solanum lycopersicum]	sp|Q05540|CHIB_SOLLC;	Acidic 27 kDa endochitinase OS=Solanum lycopersicum OX=4081 GN=CHI17 PE=1 SV=1;	PF00182.21	Glyco_hydro_19	Chitinase class I
gene_Solyc02g083460.3	Solyc02g083460.3	Eukaryotic aspartyl protease family protein (AHRD V3.3 *** A0A2U1KXY4_ARTAN)	26.91	21.65	19.21	40.17	22.31	30.58	31.03	48.93	23.91	15.54	16.09	13.8	22.59	31.02	34.6233	15.1433	GO:0016021;GO:000419	CC:integral component of membrane;MF:aspartic-type endopeptidase activity;	------	------	------	------	ENOG410XNV7	O:Posttranslational modification, protein turnover, chaperones	NP_001333366.1	aspartyl protease family protein precursor [Solanum lycopersicum]	sp|Q8VYV9|APF1_ARATH;	Aspartyl protease family protein 1 OS=Arabidopsis thaliana OX=3702 GN=APF1 PE=2 SV=1;	PF14543.8;PF00026.25;PF14541.8	TAXi_N;Asp;TAXi_C	Xylanase inhibitor N-terminal;Eukaryotic aspartyl protease;Xylanase inhibitor C-terminal
gene_Solyc02g085170.4	Solyc02g085170.4	Sugar facilitator protein 10	0.55	0.37	0.97	0.23	0.38	0.11	0.31	0.25	0.65	0.77	6.26	1.31	0.63	0.24	0.403333	2.78	GO:0006817;GO:0055085;GO:0008643;GO:0016021;GO:002285	BP:phosphate ion transport;BP:transmembrane transport;BP:carbohydrate transport;CC:integral component of membrane;MF:transmembrane transporter activity;	K03444	ERD6, ESL1	------	------	ENOG410XNQK	G:Carbohydrate transport and metabolism	TMW87645.1	hypothetical protein EJD97_019684 [Solanum chilense]	sp|Q93YP9|ERDL4_ARATH;	Sugar transporter ERD6-like 4 OS=Arabidopsis thaliana OX=3702 GN=At1g19450 PE=2 SV=1;	PF00083.26;PF07690.18;PF13347.8	Sugar_tr;MFS_1;MFS_2	Sugar;Major Facilitator Superfamily;MFS/sugar transport protein
gene_Solyc02g086454.2	Solyc02g086454.2	titin isoform X6 (AHRD V3.11 *-* XP_010316304.1)	47.45	42.84	41.29	84.43	22.26	75.06	60.83	92.85	45.56	18.1	21.62	9.39	43.86	60.5833	66.4133	16.37	------	------	------	------	------	------	ENOG410ZVAE	S:Function unknown	XP_010316304.1	titin isoform X6 [Solanum lycopersicum]	------	------	------	------	------
gene_Solyc02g086458.2	Solyc02g086458.2	titin isoform X2 (AHRD V3.11 *-* XP_010316302.1)	105.77	99.9	106.02	195.16	53.41	164.29	138.97	235.32	115.52	51.25	54.94	23.5	103.897	137.62	163.27	43.23	------	------	------	------	------	------	ENOG410ZVAE	S:Function unknown	XP_010316302.1	titin isoform X2 [Solanum lycopersicum]	------	------	------	------	------
gene_Solyc02g086530.4	Solyc02g086530.4	Raffinose synthase (AHRD V3.3 *** G5DF09_9LAMI)	1.57	2.06	0.99	3.49	2.18	2.11	1.49	2.34	1.41	0.58	0.67	0.75	1.54	2.59333	1.74667	0.666667	GO:0009737;GO:0009414;GO:0005975;GO:0006979;GO:0009507;GO:0047274;GO:001675	BP:response to abscisic acid;BP:response to water deprivation;BP:carbohydrate metabolic process;BP:response to oxidative stress;CC:chloroplast;MF:galactinol-sucrose galactosyltransferase activity;MF:transferase activity, transferring glycosyl groups;	K06617	E2.4.1.82	map00052	Galactose metabolism	ENOG410YBUA	S:Function unknown	XP_004232319.1	galactinol--sucrose galactosyltransferase [Solanum lycopersicum]	sp|Q8VWN6|RFS_PEA;	Galactinol--sucrose galactosyltransferase OS=Pisum sativum OX=3888 GN=RFS PE=1 SV=1;	PF05691.14	Raffinose_syn	Raffinose synthase or seed imbibition protein Sip1
gene_Solyc02g086970.4	Solyc02g086970.4	Aldehyde dehydrogenase (AHRD V3.3 *** A0A2U1MUY7_ARTAN)	253.2	332.24	289.67	59.25	34.63	63.87	57.39	76.17	48.05	18.71	15.99	12.44	291.703	52.5833	60.5367	15.7133	GO:0055114;GO:0016491;GO:0016620;GO:000402	BP:oxidation-reduction process;MF:oxidoreductase activity;MF:oxidoreductase activity, acting on the aldehyde or oxo group of donors, NAD or NADP as acceptor;MF:aldehyde dehydrogenas;	K00128	ALDH	map00310;map00561;map00280;map01240;map00903;map00330;map00053;map00380;map00010;map00620;map00071;map00340;map00770;map00410	Lysine degradation;Glycerolipid metabolism;Valine, leucine and isoleucine degradation;Biosynthesis of cofactors;Limonene and pinene degradation;Arginine and proline metabolism;Ascorbate and aldarate metabolism;Tryptophan metabolism;Glycolysis / Gluconeogenesis;Pyruvate metabolism;Fatty acid degradation;Histidine metabolism;Pantothenate and CoA biosynthesis;beta-Alanine metabolism	COG1012	C:Energy production and conversion	XP_010316283.1	aldehyde dehydrogenase family 2 member B7, mitochondrial [Solanum lycopersicum]	sp|C7A2A0|BALDH_ANTMA;	Benzaldehyde dehydrogenase, mitochondrial OS=Antirrhinum majus OX=4151 GN=BALDH PE=1 SV=1;	PF00171.24	Aldedh	Aldehyde dehydrogenase family
gene_Solyc02g089630.3	Solyc02g089630.3	Proline dehydrogenase (AHRD V3.3 *** A0A2G2XIU2_CAPBA)	161.43	142.07	108.09	39.8	16.99	25.53	20.42	42.08	26.5	8.46	7.47	3.3	137.197	27.44	29.6667	6.41	GO:0010133;GO:0006562;GO:0005739;GO:0004657;GO:007194	BP:proline catabolic process to glutamate;BP:proline catabolic process;CC:mitochondrion;MF:proline dehydrogenase activity;MF:FAD binding;	K00318	PRODH, fadM, putB	map00330	Arginine and proline metabolism	COG0506	E:Amino acid transport and metabolism	XP_004232111.1	proline dehydrogenase 2, mitochondrial [Solanum lycopersicum]	sp|Q6NKX1|PROD2_ARATH;	Proline dehydrogenase 2, mitochondrial OS=Arabidopsis thaliana OX=3702 GN=POX2 PE=2 SV=1;	PF01619.20	Pro_dh	Proline dehydrogenase
gene_Solyc02g090480.4	Solyc02g090480.4	Peptidyl-prolyl cis-trans isomerase CYP40 (AHRD V3.3 *** A0A2G3ABJ7_CAPAN)	6.92	9.3	11.01	5.22	10.4	4.48	7.7	3.4	7.97	9.23	19.74	14.21	9.07667	6.7	6.35667	14.3933	GO:0000413;GO:0006457;GO:0005737;GO:0005515;GO:0003755;GO:001601	BP:protein peptidyl-prolyl isomerization;BP:protein folding;CC:cytoplasm;MF:protein binding;MF:peptidyl-prolyl cis-trans isomerase activity;MF:cyclosporin A binding;	K05864	PPID, CYPD	------	------	COG0652	O:Posttranslational modification, protein turnover, chaperones	XP_004232050.1	peptidyl-prolyl cis-trans isomerase CYP40-like [Solanum lycopersicum]	sp|Q9C566|CYP40_ARATH;	Peptidyl-prolyl cis-trans isomerase CYP40 OS=Arabidopsis thaliana OX=3702 GN=CYP40 PE=2 SV=1;	PF00160.23;PF00515.30;PF07719.19;PF13414.8;PF13181.8	Pro_isomerase;TPR_1;TPR_2;TPR_11;TPR_8	Cyclophilin type peptidyl-prolyl cis-trans isomerase/CLD;Tetratricopeptide repeat;Tetratricopeptide repeat;TPR repeat;Tetratricopeptide repeat
gene_Solyc02g091140.3	Solyc02g091140.3	S-adenosyl-L-methionine-dependent methyltransferases superfamily protein (AHRD V3.3 *** A0A1P8BFJ6_ARATH)	75.46	77.37	69.36	90.26	43.81	94.24	57.88	88.63	57.09	44.5	27.83	20.37	74.0633	76.1033	67.8667	30.9	GO:0032259;GO:0008757;GO:0046872;GO:000816	BP:methylation;MF:S-adenosylmethionine-dependent methyltransferase activity;MF:metal ion binding;MF:methyltransferase activity;	------	------	------	------	ENOG4111PH9	S:Function unknown	XP_004232014.1	probable S-adenosylmethionine-dependent methyltransferase At5g38780 [Solanum lycopersicum]	sp|B2KPR3|LAMT_CATRO;	Loganic acid O-methyltransferase OS=Catharanthus roseus OX=4058 GN=LAMT PE=1 SV=1;	PF03492.17	Methyltransf_7	SAM dependent carboxyl methyltransferase
gene_Solyc02g092820.4	Solyc02g092820.4	IAA-amido synthetase 3-4	0.32	0.32	0.83	0.55	1.18	1.08	1.35	0.28	1.21	3.85	7.29	3.29	0.49	0.936667	0.946667	4.81	GO:0005737;GO:001688	CC:cytoplasm;MF:acid-amino acid ligase activity;	K14487	GH3	map04075	Plant hormone signal transduction	ENOG410XQH0	S:Function unknown	XP_004231891.1	probable indole-3-acetic acid-amido synthetase GH3.1 [Solanum lycopersicum]	sp|O82333|GH31_ARATH;	Probable indole-3-acetic acid-amido synthetase GH3.1 OS=Arabidopsis thaliana OX=3702 GN=GH3.1 PE=2 SV=1;	PF03321.15	GH3	GH3 auxin-responsive promoter
gene_Solyc02g092950.3	Solyc02g092950.3	Microtubule-associated protein RP/EB family member 1C (AHRD V3.3 *** A0A2G2XGZ8_CAPBA)	4.95	3.27	7.18	3.71	8.81	4.49	6	2.24	7.02	7.55	17.65	12.75	5.13333	5.67	5.08667	12.65	GO:0031110;GO:0007049;GO:0009652;GO:0051225;GO:0051301;GO:1904825;GO:0005737;GO:0009524;GO:0005819;GO:0005730;GO:0005618;GO:0035371;GO:0005815;GO:0005881;GO:0005874;GO:0051233;GO:0008017;GO:005101	BP:regulation of microtubule polymerization or depolymerization;BP:cell cycle;BP:thigmotropism;BP:spindle assembly;BP:cell division;BP:protein localization to microtubule plus-end;CC:cytoplasm;CC:phragmoplast;CC:spindle;CC:nucleolus;CC:cell wall;CC:microtubule plus-end;CC:microtubule organizing center;CC:cytoplasmic microtubule;CC:microtubule;CC:spindle midzone;MF:microtubule binding;MF:microtubu…	K10436	MAPRE	------	------	COG5217	Z:Cytoskeleton	XP_004231880.1	microtubule-associated protein RP/EB family member 1C [Solanum lycopersicum]	sp|Q9FGQ6|EB1C_ARATH;	Microtubule-associated protein RP/EB family member 1C OS=Arabidopsis thaliana OX=3702 GN=EB1C PE=1 SV=1;	PF03271.19;PF00307.33;PF06294.13	EB1;CH;CH_2	EB1-like C-terminal motif;Calponin homology;CH-like domain in sperm protein
gene_Solyc02g150128.1	Solyc02g150128.1	Lrr receptor-like serinethreonine-protein kinase fls2 (AHRD V3.3 *** A0A314LAY5_NICAT)	2.39	2.03	2.07	5.13	1.26	3.99	2.92	5.35	1.33	0.63	0.72	0.47	2.16333	3.46	3.2	0.606667	GO:0009755;GO:0016021;GO:0005886;GO:0005524;GO:000467	BP:hormone-mediated signaling pathway;CC:integral component of membrane;CC:plasma membrane;MF:ATP binding;MF:protein kinase activity;	------	------	------	------	COG4886	S:Function unknown	XP_006362615.1	PREDICTED: probable LRR receptor-like serine/threonine-protein kinase At3g47570 [Solanum tuberosum]	sp|C0LGP4|Y3475_ARATH;	Probable LRR receptor-like serine/threonine-protein kinase At3g47570 OS=Arabidopsis thaliana OX=3702 GN=At3g47570 PE=2 SV=1;	PF00069.27;PF13855.8;PF07714.19;PF12799.9	Pkinase;LRR_8;PK_Tyr_Ser-Thr;LRR_4	Protein kinase domain;Leucine rich repeat;Protein tyrosine and serine/threonine kinase;Leucine Rich repeats
gene_Solyc03g005420.2	Solyc03g005420.2	Flotillin-like protein 2 (AHRD V3.3 *** A0A1U8GRB6_CAPAN)	13.88	8.37	5.21	5.23	6.69	9.48	7.03	8.23	7.82	2.88	3.73	2.2	9.15333	7.13333	7.69333	2.93667	GO:0072659;GO:0005901;GO:0044853;GO:000588	BP:protein localization to plasma membrane;CC:caveola;CC:plasma membrane raft;CC:plasma membrane;	K07192	FLOT	------	------	COG2268	S:Function unknown	XP_004234032.1	flotillin-like protein 6 [Solanum lycopersicum]	sp|D2XNR1|FLOT4_MEDTR;	Flotillin-like protein 4 OS=Medicago truncatula OX=3880 GN=FLOT4 PE=2 SV=1;	PF01145.27	Band_7	SPFH domain / Band 7 family
gene_Solyc03g006250.2	Solyc03g006250.2	GDSL esterase/lipase (AHRD V3.3 *** A0A1U8GGV5_CAPAN)	4.13	4.51	4.45	14.48	29.5	7.6	18.7	15.51	46.5	62.21	38.3	88.54	4.36333	17.1933	26.9033	63.0167	GO:001678	MF:hydrolase activity, acting on ester bonds;	------	------	------	------	COG3240	S:Function unknown	XP_004234096.1	GDSL esterase/lipase At1g28590 [Solanum lycopersicum]	sp|Q8RXT9|GDL8_ARATH;	GDSL esterase/lipase At1g28590 OS=Arabidopsis thaliana OX=3702 GN=At1g28590 PE=2 SV=2;	PF00657.24	Lipase_GDSL	GDSL-like Lipase/Acylhydrolase
gene_Solyc03g006360.3	Solyc03g006360.3	Auxin-repressed protein (AHRD V3.3 *** A9YSI8_TOBAC)	1.8	1.85	7.37	7.33	10.21	3.28	2.98	1.63	3.81	18.6	189.85	45.95	3.67333	6.94	2.80667	84.8	------	------	------	------	------	------	ENOG410YV4V	S:Function unknown	XP_004234112.1	dormancy-associated protein 1 isoform X1 [Solanum lycopersicum]	sp|O22611|DRM1_PEA;	Dormancy-associated protein 1 OS=Pisum sativum OX=3888 GN=DRM1 PE=2 SV=1;	PF05564.14	Auxin_repressed	Dormancy/auxin associated protein
gene_Solyc03g006410.3	Solyc03g006410.3	PDDEXK-like protein (AHRD V3.3 *** A0A2U1QIN2_ARTAN)	1.5	1.27	0.98	4.55	1.47	2.56	2.62	3.51	1.71	9.55	10.98	4.78	1.25	2.86	2.61333	8.43667	------	------	------	------	------	------	ENOG410YC9T	S:Function unknown	XP_004234117.1	uncharacterized protein LOC101259314 [Solanum lycopersicum]	------	------	PF04720.14	PDDEXK_6	PDDEXK-like family of unknown function
gene_Solyc03g006690.1	Solyc03g006690.1	FAD-binding Berberine family protein (AHRD V3.3 *-* A0A1P8BCJ3_ARATH)	5.6	7.28	5.87	4.13	0.72	2.59	3.02	3.54	2.33	0.14	0.54	0.19	6.25	2.48	2.96333	0.29	GO:0055114;GO:0050660;GO:0071949;GO:001649	BP:oxidation-reduction process;MF:flavin adenine dinucleotide binding;MF:FAD binding;MF:oxidoreductase activity;	------	------	------	------	COG0277	C:Energy production and conversion	TMW91917.1	hypothetical protein EJD97_013740 [Solanum chilense]	sp|Q9FKV0|BBE24_ARATH;	Berberine bridge enzyme-like 24 OS=Arabidopsis thaliana OX=3702 GN=At5g44380 PE=2 SV=1;	PF08031.14	BBE	Berberine and berberine like
gene_Solyc03g006780.2	Solyc03g006780.2	G-type lectin S-receptor-like serine/threonine-protein kinase (AHRD V3.3 *** A0A2G3A8X5_CAPAN)	0.15	0.19	0.25	0.57	0.64	0.2	0.6	0.04	0.56	1.81	1.96	2.96	0.196667	0.47	0.4	2.24333	GO:0006468;GO:0046777;GO:0106311;GO:0048544;GO:0016021;GO:0005886;GO:0106310;GO:0004672;GO:0030246;GO:0004674;GO:000552	BP:protein phosphorylation;BP:protein autophosphorylation;BP:old GO;BP:recognition of pollen;CC:integral component of membrane;CC:plasma membrane;CC:old GO;MF:protein kinase activity;MF:carbohydrate binding;MF:protein serine/threonine kinase activity;MF:ATP binding;	------	------	------	------	COG0515	T:Signal transduction mechanisms	XP_027771321.1	G-type lectin S-receptor-like serine/threonine-protein kinase At1g11410 [Solanum pennellii]	sp|Q9LPZ3|Y1141_ARATH;	G-type lectin S-receptor-like serine/threonine-protein kinase At1g11410 OS=Arabidopsis thaliana OX=3702 GN=At1g11410 PE=3 SV=3;	PF00954.22;PF01453.26;PF07714.19;PF00069.27;PF08276.13	S_locus_glycop;B_lectin;PK_Tyr_Ser-Thr;Pkinase;PAN_2	S-locus glycoprotein domain;D-mannose binding lectin;Protein tyrosine and serine/threonine kinase;Protein kinase domain;PAN-like domain
gene_Solyc03g006880.3	Solyc03g006880.3	gibberellin 20-oxidase-1	5.57	5.38	6.44	3.62	2.57	2.96	2.87	1.46	2.24	7.18	4.2	9.15	5.79667	3.05	2.19	6.84333	GO:0009826;GO:0009686;GO:0009416;GO:0009908;GO:0055114;GO:0031418;GO:0051213;GO:0045544;GO:0046872;GO:001649	BP:unidimensional cell growth;BP:gibberellin biosynthetic process;BP:response to light stimulus;BP:flower development;BP:oxidation-reduction process;MF:L-ascorbic acid binding;MF:dioxygenase activity;MF:gibberellin 20-oxidase activity;MF:metal ion binding;MF:oxidoreductase activity;	K05282	GA20ox	map00904	Diterpenoid biosynthesis	COG3491	S:Function unknown	NP_001234070.1	gibberellin 20-oxidase-1 [Solanum lycopersicum]	sp|Q39110|GAOX1_ARATH;	Gibberellin 20 oxidase 1 OS=Arabidopsis thaliana OX=3702 GN=GA20OX1 PE=2 SV=2;	PF03171.22;PF14226.8	2OG-FeII_Oxy;DIOX_N	2OG-F;non-haem dioxygenase in morphine synthesis N-terminal
gene_Solyc03g007240.3	Solyc03g007240.3	spermine synthase,Pfam:PF01564	44.34	49.47	54.38	96.14	192.92	54.48	123.71	64.04	223.95	319.22	251.91	455.64	49.3967	114.513	137.233	342.257	GO:0006596;GO:0008295;GO:0016740;GO:000476	BP:polyamine biosynthetic process;BP:spermidine biosynthetic process;MF:transferase activity;MF:spermidine synthase activity;	K00797	speE, SRM, SPE3	map00270;map00480;map00330	Cysteine and methionine metabolism;Glutathione metabolism;Arginine and proline metabolism	COG0421	E:Amino acid transport and metabolism	NP_001234407.1	SPM1 protein [Solanum lycopersicum]	sp|Q94BN2|SPSY_ARATH;	Spermine synthase OS=Arabidopsis thaliana OX=3702 GN=SPMS PE=1 SV=1;	PF01564.19;PF17284.4;PF13649.8	Spermine_synth;Spermine_synt_N;Methyltransf_25	Spermine/spermidine synthase domain;Spermidine synthase tetramerisation domain;Methyltransferase domain
gene_Solyc03g019890.3	Solyc03g019890.3	beta-galactosidase 7	9.16	10.75	14.96	9.87	15.54	10.22	15.52	6.19	13.54	15.21	61.08	24.03	11.6233	11.8767	11.75	33.44	GO:0005975;GO:0080167;GO:0005618;GO:0005773;GO:0030246;GO:000456	BP:carbohydrate metabolic process;BP:response to karrikin;CC:cell wall;CC:vacuole;MF:carbohydrate binding;MF:beta-galactosidase activity;	------	------	------	------	COG1874	G:Carbohydrate transport and metabolism	NP_001234307.2	beta-galactosidase, chloroplastic precursor [Solanum lycopersicum]	sp|Q5N8X6|BGAL3_ORYSJ;	Beta-galactosidase 3 OS=Oryza sativa subsp. japonica OX=39947 GN=Os01g0875500 PE=3 SV=1;	PF01301.21;PF17834.3;PF02140.20;PF02449.17	Glyco_hydro_35;GHD;Gal_Lectin;Glyco_hydro_42	Glycosyl hydrolases family 35;Beta-sandwich domain in beta galactosidase;Galactose binding lectin domain;Beta-galactosidase
gene_Solyc03g020040.3	Solyc03g020040.3	Proteinase inhibitor type-2 (AHRD V3.3 *** A0A2G3AW51_CAPCH)	117.59	79.25	97.5	73.19	162.44	132.26	152.6	34.97	135.52	355.45	762.64	450.62	98.1133	122.63	107.697	522.903	GO:0016021;GO:000486	CC:integral component of membrane;MF:serine-type endopeptidase inhibitor activity;	------	------	------	------	------	------	XP_027771267.1	proteinase inhibitor type-2-like isoform X3 [Solanum pennellii]	sp|Q40561|IP21_TOBAC;	Proteinase inhibitor type-2 OS=Nicotiana tabacum OX=4097 PE=2 SV=1;	PF02428.17	Prot_inhib_II	Potato type II proteinase inhibitor family
gene_Solyc03g025470.5	Solyc03g025470.5	Kinesin-like protein (AHRD V3.11 *** tr|E5GCU2|E5GCU2_CUCME)	1.3	1.32	2.55	0.82	1.5	0.95	1.37	0.86	1.53	1.44	3.15	3	1.72333	1.09	1.25333	2.53	GO:0007018;GO:0005874;GO:0005871;GO:0008017;GO:0003777;GO:0016887;GO:1990939;GO:000552	BP:microtubule-based movement;CC:microtubule;CC:kinesin complex;MF:microtubule binding;MF:microtubule motor activity;MF:ATPase activity;MF:ATP-dependent microtubule motor activity;MF:ATP binding;	K10403	KIF22	------	------	COG5059	Z:Cytoskeleton	XP_004234411.1	kinesin-like protein KIN-10C isoform X2 [Solanum lycopersicum]	sp|F4KEC6|KN10C_ARATH;	Kinesin-like protein KIN-10C OS=Arabidopsis thaliana OX=3702 GN=KIN10C PE=2 SV=1;	PF00225.25;PF16796.7;PF12836.9;PF00633.25	Kinesin;Microtub_bd;HHH_3;HHH	Kinesin motor domain;Microtubule binding;Helix-hairpin-helix motif;Helix-hairpin-helix motif
gene_Solyc03g033835.2	Solyc03g033835.2	AAA-ATPase At3g50940-like (AHRD V3.11 *-* tr|A0A2I4EX93|A0A2I4EX93_9ROSI)	25.17	17.22	21.29	30.73	9.44	14.56	18.12	33.06	12.73	6.79	9.13	5.04	21.2267	18.2433	21.3033	6.98667	GO:0016887;GO:000552	MF:ATPase activity;MF:ATP binding;	K08900	BCS1	------	------	COG0465	O:Posttranslational modification, protein turnover, chaperones	KAG5614277.1	hypothetical protein H5410_014101 [Solanum commersonii]	sp|Q8VZG2|HSR4_ARATH;	Protein HYPER-SENSITIVITY-RELATED 4 OS=Arabidopsis thaliana OX=3702 GN=HSR4 PE=2 SV=1;	PF14363.8	AAA_assoc	Domain associated at C-terminal with AAA
gene_Solyc03g044330.1	Solyc03g044330.1	Acetolactate synthase (AHRD V3.3 *** C0L093_TOBAC)	45.18	53.68	78.16	88.88	121.11	84.15	96.1	73.23	101.7	159.1	244.24	205.73	59.0067	98.0467	90.3433	203.023	GO:0009635;GO:0009099;GO:0009097;GO:0005948;GO:0050660;GO:0000287;GO:0030976;GO:000398	BP:response to herbicide;BP:valine biosynthetic process;BP:isoleucine biosynthetic process;CC:acetolactate synthase complex;MF:flavin adenine dinucleotide binding;MF:magnesium ion binding;MF:thiamine pyrophosphate binding;MF:acetolactate synthase activity;	K01652	E2.2.1.6L, ilvB, ilvG, ilvI	map00660;map00290;map00770;map00650	C5-Branched dibasic acid metabolism;Valine, leucine and isoleucine biosynthesis;Pantothenate and CoA biosynthesis;Butanoate metabolism	COG0028	E:Amino acid transport and metabolism	XP_004234664.1	acetolactate synthase 2, chloroplastic [Solanum lycopersicum]	sp|P09114|ILVB2_TOBAC;	Acetolactate synthase 2, chloroplastic OS=Nicotiana tabacum OX=4097 GN=ALS SURB PE=1 SV=1;	PF02776.20;PF02775.23;PF00205.24	TPP_enzyme_N;TPP_enzyme_C;TPP_enzyme_M	Thiamine pyrophosphate enzyme, N-terminal TPP binding domain;Thiamine pyrophosphate enzyme, C-terminal TPP binding domain;Thiamine pyrophosphate enzyme, central domain
gene_Solyc03g053085.1	Solyc03g053085.1	Ribonuclease 3-like protein 2 (AHRD V3.3 *-* A0A2G3BC36_CAPCH)	0.77	0.94	1.15	0.59	0.39	0.44	0.5	0.28	0.57	7.34	5.23	3.69	0.953333	0.473333	0.45	5.42	GO:0016075;GO:0030422;GO:0006396;GO:0005737;GO:0016021;GO:0005634;GO:0004525;GO:000372	BP:rRNA catabolic process;BP:production of siRNA involved in RNA interference;BP:RNA processing;CC:cytoplasm;CC:integral component of membrane;CC:nucleus;MF:ribonuclease III activity;MF:RNA binding;	------	------	------	------	COG0571	K:Transcription	KAG5615814.1	hypothetical protein H5410_015638, partial [Solanum commersonii]	sp|Q9LTQ0|RTL2_ARATH;	Ribonuclease 3-like protein 2 OS=Arabidopsis thaliana OX=3702 GN=RTL2 PE=1 SV=1;	PF00636.28;PF14622.8	Ribonuclease_3;Ribonucleas_3_3	Ribonuclease III domain;Ribonuclease-III-like
gene_Solyc03g078360.1	Solyc03g078360.1	Receptor-like protein kinase (AHRD V3.3 *** A0A2U1PPA0_ARTAN)	8.49	5.22	5.44	9.34	5.47	6.27	6.42	11.66	5.57	3.69	3.45	2.2	6.38333	7.02667	7.88333	3.11333	GO:0006468;GO:0048544;GO:0016021;GO:0030246;GO:0005524;GO:0004672;GO:0106310;GO:010631	BP:protein phosphorylation;BP:recognition of pollen;CC:integral component of membrane;MF:carbohydrate binding;MF:ATP binding;MF:protein kinase activity;MF:old GO;MF:old GO;	------	------	------	------	COG0515	T:Signal transduction mechanisms	XP_004235072.1	G-type lectin S-receptor-like serine/threonine-protein kinase LECRK1 [Solanum lycopersicum]	sp|Q7FAZ3|LERK1_ORYSJ;	G-type lectin S-receptor-like serine/threonine-protein kinase LECRK1 OS=Oryza sativa subsp. japonica OX=39947 GN=LECRK1 PE=2 SV=1;	PF07714.19;PF00069.27;PF01453.26;PF00954.22	PK_Tyr_Ser-Thr;Pkinase;B_lectin;S_locus_glycop	Protein tyrosine and serine/threonine kinase;Protein kinase domain;D-mannose binding lectin;S-locus glycoprotein domain
gene_Solyc03g078490.5	Solyc03g078490.5	Glycosyltransferase (AHRD V3.11 *** tr|A0A2I4HTK4|A0A2I4HTK4_9ROSI)	39.58	23.78	21.11	29.66	5.08	18.99	16.06	21.07	14.49	6.56	7.69	3.8	28.1567	17.91	17.2067	6.01667	GO:0009718;GO:0080043;GO:0008194;GO:0047213;GO:008004	BP:anthocyanin-containing compound biosynthetic process;MF:quercetin 3-O-glucosyltransferase activity;MF:UDP-glycosyltransferase activity;MF:anthocyanidin 3-O-glucosyltransferase activity;MF:quercetin 7-O-glucosyltransferase activity;	------	------	------	------	COG1819	S:Function unknown	XP_004235065.1	linamarin synthase 1-like [Solanum lycopersicum]	sp|G3FIN8|UGTK4_MANES;	Linamarin synthase 1 OS=Manihot esculenta OX=3983 GN=UGT85K4 PE=1 SV=1;	PF00201.20	UDPGT	UDP-glucoronosyl and UDP-glucosyl transferase
gene_Solyc03g080020.4	Solyc03g080020.4	Major facilitator superfamily domain, general substrate transporter (AHRD V3.3 *-* A0A0A2K2T0_PENEN)	18.51	19.89	15.9	12.14	7.76	14.18	11.82	15.66	12.21	5.01	7.06	4.54	18.1	11.36	13.23	5.53667	GO:0006817;GO:001602	BP:phosphate ion transport;CC:integral component of membrane;	------	------	------	------	ENOG410ZITE	S:Function unknown	XP_004235041.1	UNC93-like protein 1 [Solanum lycopersicum]	sp|Q56WD3|UN931_ARATH;	UNC93-like protein 1 OS=Arabidopsis thaliana OX=3702 GN=At1g18000 PE=2 SV=2;	------	------	------
gene_Solyc03g080190.3	Solyc03g080190.3	2-oxoglutarate (2OG) and Fe(II)-dependent oxygenase superfamily protein (AHRD V3.3 *** A0A2U1QGX7_ARTAN)	9.99	9.06	11.6	43.98	25.14	37.39	32.28	41.71	18.56	12.82	16.59	14.05	10.2167	35.5033	30.85	14.4867	GO:0055114;GO:0031418;GO:0046872;GO:0051213;GO:001649	BP:oxidation-reduction process;MF:L-ascorbic acid binding;MF:metal ion binding;MF:dioxygenase activity;MF:oxidoreductase activity;	K24028	DMR6, DLO	------	------	COG3491	S:Function unknown	NP_001233840.2	protein DMR6-like oxygenase [Solanum lycopersicum]	sp|Q9FLV0|DMR6_ARATH;	Protein DOWNY MILDEW RESISTANCE 6 OS=Arabidopsis thaliana OX=3702 GN=DMR6 PE=1 SV=1;	PF03171.22;PF14226.8	2OG-FeII_Oxy;DIOX_N	2OG-F;non-haem dioxygenase in morphine synthesis N-terminal
gene_Solyc03g081270.2	Solyc03g081270.2	Two-component response regulator-like APRR9 (AHRD V3.3 *-* A0A1U8G692_CAPAN)	0	0	0.35	0.07	0.28	0	0.31	0	0.31	4.58	3.4	1.6	0.116667	0.116667	0.206667	3.19333	GO:0048511;GO:0000160;GO:0005634;GO:0004252;GO:000551	BP:rhythmic process;BP:phosphorelay signal transduction system;CC:nucleus;MF:serine-type endopeptidase activity;MF:protein binding;	K12130	PRR5	map04712	Circadian rhythm - plant	COG5641	K:Transcription	TMW83190.1	hypothetical protein EJD97_002537 [Solanum chilense]	sp|Q6LA42|APRR5_ARATH;	Two-component response regulator-like APRR5 OS=Arabidopsis thaliana OX=3702 GN=APRR5 PE=1 SV=2;	PF06203.16;PF00082.24	CCT;Peptidase_S8	CCT motif;Subtilase family
gene_Solyc03g082805.1	Solyc03g082805.1	Unknown protein	1.94	1.91	2.75	1.31	1.88	0.89	0.9	1.14	1.27	2.28	6.77	3.93	2.2	1.36	1.10333	4.32667	------	------	------	------	------	------	------	------	------	------	------	------	------	------	------
gene_Solyc03g083440.4	Solyc03g083440.4	Glutamate synthase (AHRD V3.3 *** A0A2U1PKW7_ARTAN)	3.71	3.16	6.12	4.79	10.36	3.39	5.19	2.34	8.77	12.51	23.35	20.83	4.33	6.18	5.43333	18.8967	GO:0019676;GO:0048589;GO:0097054;GO:0006541;GO:0006537;GO:0046686;GO:0055114;GO:0009570;GO:0015930;GO:0050660;GO:0051538;GO:0016040;GO:0010181;GO:0005506;GO:001649	BP:ammonia assimilation cycle;BP:developmental growth;BP:L-glutamate biosynthetic process;BP:glutamine metabolic process;BP:glutamate biosynthetic process;BP:response to cadmium ion;BP:oxidation-reduction process;CC:chloroplast stroma;MF:glutamate synthase activity;MF:flavin adenine dinucleotide binding;MF:3 iron, 4 sulfur cluster binding;MF:glutamate synthas;MF:FMN binding;MF:iron ion binding;MF…	K00264	GLT1	map00250;map00910	Alanine, aspartate and glutamate metabolism;Nitrogen metabolism	COG0067	E:Amino acid transport and metabolism	XP_004234955.1	glutamate synthase 1 [NADH], chloroplastic isoform X1 [Solanum lycopersicum]	sp|Q9LV03|GLUT1_ARATH;	Glutamate synthase 1 [NADH], chloroplastic OS=Arabidopsis thaliana OX=3702 GN=GLT1 PE=1 SV=2;	PF00310.23;PF01645.19;PF04898.16;PF01493.21;PF07992.16;PF14691.8;PF13450.8;PF00070.29;PF01266.26;PF01593.26;PF12831.9	GATase_2;Glu_synthase;Glu_syn_central;GXGXG;Pyr_redox_2;Fer4_20;NAD_binding_8;Pyr_redox;DAO;Amino_oxidase;FAD_oxidored	Glutamine amidotransferases class-II;Conserved region in glutamate synthase;Glutamate synthase central domain;GXGXG motif;Pyridine nucleotide-disulphide oxidoreductase;Dihydroprymidine dehydrogenase domain II, 4Fe-4S cluster;NA;Pyridine nucleotide-disulphide oxidoreductase;FAD dependent oxidoreductase;Flavin containing amine oxidoreductase;FAD dependent oxidoreductase
gene_Solyc03g083970.3	Solyc03g083970.3	BAG family molecular chaperone regulator 7-like (AHRD V3.3 *** A0A2I4H718_9ROSI)	32.41	33.41	64.19	62.6	66.49	48.11	42.36	27.66	41.62	77.49	179.96	112.32	43.3367	59.0667	37.2133	123.257	GO:0006457;GO:0034605;GO:0070417;GO:0034620;GO:0005783;GO:0005886;GO:0009506;GO:005108	BP:protein folding;BP:cellular response to heat;BP:cellular response to cold;BP:cellular response to unfolded protein;CC:endoplasmic reticulum;CC:plasma membrane;CC:plasmodesma;MF:chaperone binding;	------	------	------	------	ENOG410YFGU	S:Function unknown	XP_004234927.1	BAG family molecular chaperone regulator 7 [Solanum lycopersicum]	sp|Q9LVA0|BAG7_ARATH;	BAG family molecular chaperone regulator 7 OS=Arabidopsis thaliana OX=3702 GN=BAG7 PE=1 SV=1;	PF02179.18	BAG	BAG domain
gene_Solyc03g095600.1	Solyc03g095600.1	KIP1-like (AHRD V3.3 *-* A0A200R3P8_9MAGN)	6.62	5.93	11.97	6.02	8.32	4.56	10.4	3.79	9.19	10.55	22.1	17.56	8.17333	6.3	7.79333	16.7367	GO:0005774;GO:000377	CC:vacuolar membrane;MF:actin binding;	------	------	------	------	ENOG41117CB	S:Function unknown	XP_004235221.1	protein NETWORKED 4B [Solanum lycopersicum]	sp|F4KEW8|NET4A_ARATH;	Protein NETWORKED 4A OS=Arabidopsis thaliana OX=3702 GN=NET4A PE=2 SV=1;	PF10186.11	ATG14	Vacuolar sorting 38 and autophagy-related subunit 14
gene_Solyc03g095650.3	Solyc03g095650.3	MLO-like protein (AHRD V3.3 *** K4BIY8_SOLLC)	4.1	5.89	3.42	5.66	3.88	7.81	6.84	10.96	3.87	0.14	0.4	0.26	4.47	5.78333	7.22333	0.266667	GO:0006952;GO:0009607;GO:0016021;GO:000551	BP:defense response;BP:response to biotic stimulus;CC:integral component of membrane;MF:calmodulin binding;	K08472	MLO	------	------	ENOG410ZUVB	D:Cell cycle control, cell division, chromosome partitioning	XP_004235223.1	MLO-like protein 2 isoform X1 [Solanum lycopersicum]	sp|Q94KB7|MLO6_ARATH;	MLO-like protein 6 OS=Arabidopsis thaliana OX=3702 GN=MLO6 PE=2 SV=2;	PF03094.17	Mlo	Mlo family
gene_Solyc03g096890.3	Solyc03g096890.3	Serine/threonine-protein kinase TIO (AHRD V3.3 *** A0A1U8FYB3_CAPAN)	1.52	1.92	2.79	1.35	3.01	1.32	2.23	0.98	2.65	2.76	5.97	5.35	2.07667	1.89333	1.95333	4.69333	GO:0000911;GO:0007112;GO:0009558;GO:0006468;GO:0005737;GO:0009524;GO:0019894;GO:0004672;GO:000552	BP:cytokinesis by cell plate formation;BP:male meiosis cytokinesis;BP:embryo sac cellularization;BP:protein phosphorylation;CC:cytoplasm;CC:phragmoplast;MF:kinesin binding;MF:protein kinase activity;MF:ATP binding;	K06228	FU	------	------	ENOG410XRQ6	T:Signal transduction mechanisms	XP_010318270.1	serine/threonine-protein kinase TIO isoform X1 [Solanum lycopersicum]	sp|Q2QAV0|TIO_ARATH;	Serine/threonine-protein kinase TIO OS=Arabidopsis thaliana OX=3702 GN=TIO PE=1 SV=1;	PF00069.27;PF07714.19;PF03109.18;PF14531.8;PF17667.3	Pkinase;PK_Tyr_Ser-Thr;ABC1;Kinase-like;Pkinase_fungal	Protein kinase domain;Protein tyrosine and serine/threonine kinase;ABC1 atypical kinase-like domain;Kinase-like;Fungal protein kinase
gene_Solyc03g097600.4	Solyc03g097600.4	Bidirectional sugar transporter SWEET (AHRD V3.11 *** tr|M1D4D4|M1D4D4_SOLTU)	131.34	117.59	117.8	185.93	74.51	153.02	105.66	178.07	131.66	77.64	66.83	47.61	122.243	137.82	138.463	64.0267	GO:0008643;GO:0016021;GO:0005886;GO:005111	BP:carbohydrate transport;CC:integral component of membrane;CC:plasma membrane;MF:sugar transmembrane transporter activity;	K15382	SLC50A, SWEET	------	------	ENOG4111M4R	U:Intracellular trafficking, secretion, and vesicular transport	KAG5617550.1	hypothetical protein H5410_017374 [Solanum commersonii]	sp|Q9LUE3|SWT10_ARATH;	Bidirectional sugar transporter SWEET10 OS=Arabidopsis thaliana OX=3702 GN=SWEET10 PE=1 SV=1;	PF03083.18	MtN3_slv	Sugar efflux transporter for intercellular exchange
gene_Solyc03g098700.1	Solyc03g098700.1	Cysteine protease inhibitor.1	0	0.11	0.08	0	0.12	0	0.12	0	0	0.55	1.07	1.59	0.063333	0.04	0.04	1.07	GO:0005773;GO:0004869;GO:000486	CC:vacuole;MF:cysteine-type endopeptidase inhibitor activity;MF:endopeptidase inhibitor activity;	------	------	------	------	------	------	XP_004235410.1	cysteine protease inhibitor 10 [Solanum lycopersicum]	sp|O24384|CPI8_SOLTU;	Cysteine protease inhibitor 8;	PF00197.20	Kunitz_legume	Trypsin and protease inhibitor
gene_Solyc03g098720.3	Solyc03g098720.3	Kunitz trypsin inhibitor (AHRD V3.3 *** Q39869_SOYBN)	0.17	0.67	0.23	1.1	5.72	0.69	0.67	0	0.88	7.86	10.19	35.01	0.356667	2.50333	0.516667	17.6867	GO:000486	MF:endopeptidase inhibitor activity;	------	------	------	------	ENOG410YHN1	O:Posttranslational modification, protein turnover, chaperones	XP_019068552.1	kunitz-type serine protease inhibitor DrTI-like [Solanum lycopersicum]	sp|P13087|MIRA_SYNDU;	Miraculin OS=Synsepalum dulcificum OX=3743 PE=1 SV=3;	PF00197.20	Kunitz_legume	Trypsin and protease inhibitor
gene_Solyc03g098780.2	Solyc03g098780.2	Aspartic protease inhibitor.1	81.89	161.72	225.33	580.36	1555.74	641.98	605.64	460.59	1582.56	5038.87	2817.68	6096.2	156.313	926.027	882.93	4650.92	GO:0005773;GO:0019828;GO:0004866;GO:000486	CC:vacuole;MF:aspartic-type endopeptidase inhibitor activity;MF:endopeptidase inhibitor activity;MF:serine-type endopeptidase inhibitor activity;	------	------	------	------	------	------	XP_004235413.1	aspartic protease inhibitor 1 [Solanum lycopersicum]	sp|Q41480|API1_SOLTU;	Aspartic protease inhibitor 1 OS=Solanum tuberosum OX=4113 PE=1 SV=2;	PF00197.20	Kunitz_legume	Trypsin and protease inhibitor
gene_Solyc03g098790.3	Solyc03g098790.3	cathepsin D inhibitor protein	26.31	192.52	96.13	581.01	2705.01	761.32	1087.86	242.18	2453.8	7740.35	4178.07	9696.98	104.987	1349.11	1261.28	7205.13	GO:0005773;GO:0019828;GO:0004866;GO:000486	CC:vacuole;MF:aspartic-type endopeptidase inhibitor activity;MF:endopeptidase inhibitor activity;MF:serine-type endopeptidase inhibitor activity;	------	------	------	------	------	------	NP_001234142.2	cathepsin D inhibitor protein precursor [Solanum lycopersicum]	sp|P17979|API8_SOLTU;	Aspartic protease inhibitor 8 OS=Solanum tuberosum OX=4113 PE=2 SV=1;	PF00197.20	Kunitz_legume	Trypsin and protease inhibitor
gene_Solyc03g111790.4	Solyc03g111790.4	Centromere protein X (AHRD V3.3 *** A0A1U8FY32_CAPAN)	23.31	18.7	19.08	33.95	21.67	34.33	25.63	45.23	19.49	11.64	14.13	9.57	20.3633	29.9833	30.1167	11.78	GO:0051382;GO:0006281;GO:0000712;GO:0007129;GO:0031297;GO:0043240;GO:0071821;GO:000367	BP:kinetochore assembly;BP:DNA repair;BP:resolution of meiotic recombination intermediates;BP:synapsis;BP:replication fork processing;CC:Fanconi anaemia nuclear complex;CC:FANCM-MHF complex;MF:DNA binding;	K15360	STRA13, CENPX, MHF2	------	------	ENOG410XYKN	S:Function unknown	XP_004236296.1	protein MHF2 homolog [Solanum lycopersicum]	sp|Q8L7N3|CENPX_ARATH;	Protein MHF2 homolog OS=Arabidopsis thaliana OX=3702 GN=MHF2 PE=3 SV=1;	PF09415.12	CENP-X	CENP-S associating Centromere protein X
gene_Solyc03g112590.4	Solyc03g112590.4	Cell division cycle protein 48-like protein (AHRD V3.3 *** A0A2G3CYA7_CAPCH)	0.36	0.12	0.17	0.07	0.26	0.17	0.17	0.03	0.2	0.09	8.19	0.42	0.216667	0.166667	0.133333	2.9	GO:0030433;GO:0030970;GO:0051228;GO:0071712;GO:0051301;GO:0097352;GO:0005829;GO:0034098;GO:0005634;GO:0016787;GO:0016887;GO:0031593;GO:000552	BP:ER-associated ubiquitin-dependent protein catabolic process;BP:retrograde protein transport, ER to cytosol;BP:mitotic spindle disassembly;BP:ER-associated misfolded protein catabolic process;BP:cell division;BP:autophagosome maturation;CC:cytosol;CC:VCP-NPL4-UFD1 AAA ATPase complex;CC:nucleus;MF:hydrolase activity;MF:ATPase activity;MF:polyubiquitin binding;MF:ATP binding;	K13525	VCP, CDC48	map04141	Protein processing in endoplasmic reticulum	COG0464	O:Posttranslational modification, protein turnover, chaperones	XP_004236235.1	cell division cycle protein 48 homolog isoform X1 [Solanum lycopersicum]	sp|P54774|CDC48_SOYBN;	Cell division cycle protein 48 homolog OS=Glycine max OX=3847 GN=CDC48 PE=2 SV=1;	PF00004.31;PF17862.3;PF02359.20;PF05496.14;PF02933.19;PF13191.8;PF07724.16;PF13671.8;PF07728.16;PF01443.20;PF09336.12	AAA;AAA_lid_3;CDC48_N;RuvB_N;CDC48_2;AAA_16;AAA_2;AAA_33;AAA_5;Viral_helicase1;Vps4_C	ATPase family associated with various cellular activities;AAA+ lid domain;Cell division protein 48;Holliday junction DNA helicase RuvB P-loop domain;Cell division protein 48;AAA ATPase domain;AAA domain;AAA domain;AAA domain;Viral;Vps4 C terminal oligomerisation domain
gene_Solyc03g114175.1	Solyc03g114175.1	Glycosyltransferase (AHRD V3.3 *** A0A2U1M9M1_ARTAN)	1	0.47	0.86	0.83	1.52	1.8	1.74	0.52	1.48	2.82	13.52	3.97	0.776667	1.38333	1.24667	6.77	GO:0016758;GO:000819	MF:transferase activity, transferring hexosyl groups;MF:UDP-glycosyltransferase activity;	------	------	------	------	COG1819	S:Function unknown	XP_004236114.1	UDP-glycosyltransferase 90A1-like [Solanum lycopersicum]	sp|Q9ZVX4|U90A1_ARATH;	UDP-glycosyltransferase 90A1 OS=Arabidopsis thaliana OX=3702 GN=UGT90A1 PE=2 SV=1;	PF00201.20	UDPGT	UDP-glucoronosyl and UDP-glucosyl transferase
gene_Solyc03g114530.5	Solyc03g114530.5	Strictosidine synthase (AHRD V3.11 *** tr|A0A346A6F4|A0A346A6F4_GELSE)	0.2	0	0.23	0	0.19	0.06	0.14	0	0.11	2.77	0.82	2.6	0.143333	0.083333	0.083333	2.06333	GO:0009058;GO:0005773;GO:001684	BP:biosynthetic process;CC:vacuole;MF:strictosidine synthase activity;	------	------	------	------	COG3386	G:Carbohydrate transport and metabolism	XP_004236090.1	protein STRICTOSIDINE SYNTHASE-LIKE 11-like [Solanum lycopersicum]	sp|P92976|SSL11_ARATH;	Protein STRICTOSIDINE SYNTHASE-LIKE 11 OS=Arabidopsis thaliana OX=3702 GN=SSL11 PE=2 SV=2;	PF03088.18;PF08450.14;PF20067.1	Str_synth;SGL;APMAP_N	Strictosidine synthase;SMP-30/Gluconolactonase/LRE-like region;Adipocyte plasma membrane-associated protein-like, N-terminal
gene_Solyc03g116730.5	Solyc03g116730.5	Palmitoyl-monogalactosyldiacylglycerol delta-7 desaturase, chloroplastic (AHRD V3.11 *** tr|A0A2G2WQQ5|A0A2G2WQQ5_CAPBA)	5.27	5.27	6.54	7.28	7.22	6.3	10.96	5.47	7.17	17.16	13.97	19.07	5.69333	6.93333	7.86667	16.7333	GO:0006633;GO:0010205;GO:0006636;GO:0006629;GO:0005789;GO:0016021;GO:0009979;GO:001671	BP:fatty acid biosynthetic process;BP:photoinhibition;BP:unsaturated fatty acid biosynthetic process;BP:lipid metabolic process;CC:endoplasmic reticulum membrane;CC:integral component of membrane;MF:1;MF:oxidoreductase activity, acting on paired donors, with oxidation of a pair of donors resulting in the reduction of molecular oxygen to two molecules of water;	K20416	FAD5	------	------	COG1398	I:Lipid transport and metabolism	XP_004235954.1	palmitoyl-monogalactosyldiacylglycerol delta-7 desaturase, chloroplastic [Solanum lycopersicum]	sp|Q949X0|ADS3_ARATH;	Palmitoyl-monogalactosyldiacylglycerol delta-7 desaturase, chloroplastic OS=Arabidopsis thaliana OX=3702 GN=ADS3 PE=1 SV=2;	PF00487.26	FA_desaturase	Fatty acid desaturase
gene_Solyc03g116930.3	Solyc03g116930.3	Phospholipase-like protein (AHRD V3.3 *** A0A2U1PUP4_ARTAN)	6.89	7.81	8.18	3.96	4.37	5.43	7.54	9.2	8.98	1.56	2.3	1.19	7.62667	4.58667	8.57333	1.68333	GO:0007064;GO:0051301;GO:0006281;GO:0005634;GO:000078	BP:mitotic sister chromatid cohesion;BP:cell division;BP:DNA repair;CC:nucleus;CC:chromatin;	------	------	------	------	ENOG410XQW7	S:Function unknown	XP_015067614.1	uncharacterized protein LOC107012321 isoform X1 [Solanum pennellii]	sp|Q04264|PDS5_YEAST;	Sister chromatid cohesion protein PDS5 OS=Saccharomyces cerevisiae;	PF05278.14	PEARLI-4	Arabidopsis phospholipase-like protein
gene_Solyc03g116950.2	Solyc03g116950.2	Phospholipase-like protein (AHRD V3.3 *-* A0A2U1KY47_ARTAN)	1.67	1.6	3.74	0.75	0.74	1.46	0.95	1.16	1.49	0.11	0.33	0.15	2.33667	0.983333	1.2	0.196667	GO:0007064;GO:000563	BP:mitotic sister chromatid cohesion;CC:nucleus;	------	------	------	------	ENOG410XQW7;ENOG410Z5M3	S:Function unknown;	XP_019068662.1	uncharacterized protein LOC101253990 [Solanum lycopersicum]	------	------	PF05278.14;PF12718.9	PEARLI-4;Tropomyosin_1	Arabidopsis phospholipase-like protein;Tropomyosin like
gene_Solyc03g117630.1	Solyc03g117630.1	Heat shock 70 kDa protein (AHRD V3.3 *** A0A1U8FVW2_CAPAN)	3.24	4.36	3.77	4.61	4.55	4.35	4.97	3.17	4.47	16.56	6.35	6.63	3.79	4.50333	4.20333	9.84667	GO:0034620;GO:0051085;GO:0042026;GO:0005737;GO:0005788;GO:0031072;GO:0032440;GO:0044183;GO:0051082;GO:0051787;GO:0016887;GO:000552	BP:cellular response to unfolded protein;BP:chaperone mediated protein folding requiring cofactor;BP:protein refolding;CC:cytoplasm;CC:endoplasmic reticulum lumen;MF:heat shock protein binding;MF:2-alkenal reductase [NA;MF:protein binding involved in protein folding;MF:unfolded protein binding;MF:misfolded protein binding;MF:ATPase activity;MF:ATP binding;	K03283	HSPA1s	map04144;map04141;map03040	Endocytosis;Protein processing in endoplasmic reticulum;Spliceosome	COG0443	O:Posttranslational modification, protein turnover, chaperones	XP_010318701.1	heat shock 70 kDa protein 5 [Solanum lycopersicum]	sp|P09189|HSP7C_PETHY;	Heat shock cognate 70 kDa protein OS=Petunia hybrida OX=4102 GN=HSP70 PE=2 SV=1;	PF00012.22;PF06723.15	HSP70;MreB_Mbl	Hsp70 protein;MreB/Mbl protein
gene_Solyc03g117870.3	Solyc03g117870.3	4-coumarate:CoA ligase (AHRD V3.3 *** Q42879_LITER)	24.87	25.31	26.02	42.95	58.69	22.73	43.64	27.81	66.27	96.73	92.03	127.09	25.4	41.4567	45.9067	105.283	GO:0033494;GO:0009800;GO:0009803;GO:0106286;GO:0052315;GO:0007623;GO:0009698;GO:0005829;GO:0016207;GO:0050563;GO:0018858;GO:0106290;GO:0016405;GO:0003824;GO:000552	BP:ferulate metabolic process;BP:cinnamic acid biosynthetic process;BP:cinnamic acid metabolic process;BP:old GO;BP:phytoalexin biosynthetic process;BP:circadian rhythm;BP:phenylpropanoid metabolic process;CC:cytosol;MF:4-coumarate-CoA ligase activity;MF:trans-feruloyl-CoA synthase activity;MF:benzoate-CoA ligase activity;MF:old GO;MF:CoA-ligase activity;MF:catalytic activity;MF:ATP binding;	K01904	4CL	map00130;map00940	Ubiquinone and other terpenoid-quinone biosynthesis;Phenylpropanoid biosynthesis	COG0318;COG0318	I:Lipid transport and metabolism;Q:Secondary metabolites biosynthesis, transport and catabolism	NP_001333770.1	4-coumarate--CoA ligase [Solanum lycopersicum]	sp|P31684|4CL1_SOLTU;	4-coumarate--CoA ligase 1 OS=Solanum tuberosum OX=4113 GN=4CL1 PE=3 SV=1;	PF00501.30;PF13193.8	AMP-binding;AMP-binding_C	AMP-binding enzyme;AMP-binding enzyme C-terminal domain
gene_Solyc03g118470.4	Solyc03g118470.4	Nudix hydrolase 4 (AHRD V3.3 *** A0A2G3CZQ7_CAPCH)	25.99	30.87	28.86	45.01	28.71	21.26	40.09	42.33	37.96	117.21	79.39	71.28	28.5733	31.66	40.1267	89.2933	GO:0005737;GO:0005634;GO:001678	CC:cytoplasm;CC:nucleus;MF:hydrolase activity;	K07766	E3.6.1.52	------	------	COG0494	L:Replication, recombination and repair	XP_010318659.1	nudix hydrolase 18, mitochondrial isoform X2 [Solanum lycopersicum]	sp|Q9ZU95|NUD17_ARATH;	Nudix hydrolase 17, mitochondrial OS=Arabidopsis thaliana OX=3702 GN=NUDT17 PE=2 SV=1;	PF00293.30	NUDIX	NUDIX domain
gene_Solyc03g120110.3	Solyc03g120110.3	Lectin protein kinase family protein (AHRD V3.3 *** A0A1I9LPL5_ARATH)	2.53	2.44	1.52	4.33	1.71	3.8	2.77	4.5	1.92	1.16	1.11	0.66	2.16333	3.28	3.06333	0.976667	GO:0006468;GO:0046777;GO:0106311;GO:0106310;GO:0016021;GO:0005886;GO:0004672;GO:0030246;GO:0004674;GO:000552	BP:protein phosphorylation;BP:protein autophosphorylation;BP:old GO;BP:old GO;CC:integral component of membrane;CC:plasma membrane;MF:protein kinase activity;MF:carbohydrate binding;MF:protein serine/threonine kinase activity;MF:ATP binding;	------	------	------	------	COG0515	T:Signal transduction mechanisms	XP_004236409.1	G-type lectin S-receptor-like serine/threonine-protein kinase CES101 [Solanum lycopersicum]	sp|Q9LW83|CE101_ARATH;	G-type lectin S-receptor-like serine/threonine-protein kinase CES101 OS=Arabidopsis thaliana OX=3702 GN=CES101 PE=2 SV=2;	PF07714.19;PF00069.27;PF01453.26;PF08276.13;PF11883.10	PK_Tyr_Ser-Thr;Pkinase;B_lectin;PAN_2;DUF3403	Protein tyrosine and serine/threonine kinase;Protein kinase domain;D-mannose binding lectin;PAN-like domain;Domain of unknown function
gene_Solyc03g120990.3	Solyc03g120990.3	Malic enzyme (AHRD V3.3 *** A0A2G3D1G2_CAPCH)	0.49	0.35	0.37	0.63	0.5	0.38	0.87	0.54	0.61	2.68	4.48	1.64	0.403333	0.503333	0.673333	2.93333	GO:0006090;GO:0006108;GO:0055114;GO:0009507;GO:0004473;GO:0051287;GO:0004471;GO:0004470;GO:004687	BP:pyruvate metabolic process;BP:malate metabolic process;BP:oxidation-reduction process;CC:chloroplast;MF:malate dehydrogenas;MF:NAD binding;MF:malate dehydrogenas;MF:malic enzyme activity;MF:metal ion binding;	K00029	E1.1.1.40, maeB	map00620;map00710	Pyruvate metabolism;Carbon fixation in photosynthetic organisms	COG0281	C:Energy production and conversion	XP_004235645.1	NADP-dependent malic enzyme, chloroplastic [Solanum lycopersicum]	sp|P36444|MAOC_FLAPR;	NADP-dependent malic enzyme, chloroplastic OS=Flaveria pringlei OX=4226 GN=MODA PE=2 SV=1;	PF03949.17;PF00390.21	Malic_M;malic	Malic enzyme, NAD binding domain;Malic enzyme, N-terminal domain
gene_Solyc04g006930.3	Solyc04g006930.3	Protein kinase family protein (AHRD V3.3 *-* E5GBJ3_CUCME)	0.64	0.9	0.43	0.78	1.02	0.96	0.9	0.32	0.78	1.32	3.29	1.59	0.656667	0.92	0.666667	2.06667	GO:0006468;GO:0016021;GO:0005886;GO:0004672;GO:0004674;GO:0005509;GO:000552	BP:protein phosphorylation;CC:integral component of membrane;CC:plasma membrane;MF:protein kinase activity;MF:protein serine/threonine kinase activity;MF:calcium ion binding;MF:ATP binding;	------	------	------	------	COG5126;COG5126;COG5126;COG0515	D:Cell cycle control, cell division, chromosome partitioning;T:Signal transduction mechanisms;Z:Cytoskeleton;T:Signal transduction mechanisms	XP_019068789.1	proline-rich receptor-like protein kinase PERK9 isoform X3 [Solanum lycopersicum]	sp|Q9C660|PEK10_ARATH;	Proline-rich receptor-like protein kinase PERK10 OS=Arabidopsis thaliana OX=3702 GN=PERK10 PE=1 SV=2;	PF07714.19;PF00069.27;PF00036.34;PF13499.8;PF13405.8;PF13202.8;PF13833.8;PF17667.3	PK_Tyr_Ser-Thr;Pkinase;EF-hand_1;EF-hand_7;EF-hand_6;EF-hand_5;EF-hand_8;Pkinase_fungal	Protein tyrosine and serine/threonine kinase;Protein kinase domain;EF hand;EF-hand domain pair;EF-hand domain;EF hand;EF-hand domain pair;Fungal protein kinase
gene_Solyc04g007320.3	Solyc04g007320.3	Disease resistance protein (TIR-NBS-LRR class) (AHRD V3.3 *** A0A2U1PW75_ARTAN)	9.21	7.91	7.84	19.07	9.78	12.14	12.41	17.7	10.43	7.05	4.91	3.22	8.32	13.6633	13.5133	5.06	GO:0006952;GO:0007165;GO:0016787;GO:004353	BP:defense response;BP:signal transduction;MF:hydrolase activity;MF:ADP binding;	------	------	------	------	COG4886	S:Function unknown	XP_004237202.1	TMV resistance protein N-like [Solanum lycopersicum]	sp|A0A290U7C4|ROQ1_NICBE;	Disease resistance protein Roq1 OS=Nicotiana benthamiana OX=4100 GN=ROQ1 PE=1 SV=1;	PF01582.22;PF00931.24;PF20160.1;PF13676.8;PF12799.9;PF13855.8;PF13191.8;PF05729.14;PF13401.8	TIR;NB-ARC;C-JID;TIR_2;LRR_4;LRR_8;AAA_16;NACHT;AAA_22	TIR domain;NB-ARC domain;C-JID domain;TIR domain;Leucine Rich repeats;Leucine rich repeat;AAA ATPase domain;NACHT domain;AAA domain
gene_Solyc04g007500.1	Solyc04g007500.1	RING-H2 finger protein 2B (AHRD V3.3 *** A0A2U1PWM9_ARTAN)	47.08	64.62	50.44	66.36	38.96	52.27	53.78	60.06	39.39	23.58	23.42	18.95	54.0467	52.53	51.0767	21.9833	GO:0016567;GO:0016021;GO:006163	BP:protein ubiquitination;CC:integral component of membrane;MF:ubiquitin protein ligase activity;	K16282	RHA2	------	------	ENOG41121N2	O:Posttranslational modification, protein turnover, chaperones	TMW90689.1	hypothetical protein EJD97_015377 [Solanum chilense]	sp|Q9ZT50|RHA2A_ARATH;	E3 ubiquitin-protein ligase RHA2A OS=Arabidopsis thaliana OX=3702 GN=RHA2A PE=1 SV=1;	PF13639.8;PF13923.8;PF12678.9;PF17123.7;PF14634.8;PF13920.8;PF00097.27;PF17120.7;PF14447.8;PF12861.9	zf-RING_2;zf-C3HC4_2;zf-rbx1;zf-RING_11;zf-RING_5;zf-C3HC4_3;zf-C3HC4;Zn_ribbon_17;Prok-RING_4;zf-ANAPC11	Ring finger domain;Zinc finger, C3HC4 type;RING-H2 zinc finger domain;RING-like zinc finger;zinc-RING finger domain;Zinc finger, C3HC4 type;Zinc finger, C3HC4 type;Zinc-ribbon, C4HC2 type;Prokaryotic RING finger family 4;Anaphase-promoting complex subunit 11 RING-H2 finger
gene_Solyc04g007580.1	Solyc04g007580.1	DUF4228 domain-containing protein (AHRD V3.3 *** A0A1Q3CT45_CEPFO)	7.98	3.87	3.77	29.45	25.56	11.65	31.13	45.41	31.43	86.35	67.68	49.84	5.20667	22.22	35.99	67.9567	------	------	------	------	------	------	ENOG4111CSR;ENOG410YRN3	S:Function unknown;	XP_004237025.1	uncharacterized protein LOC101267223 [Solanum lycopersicum]	------	------	PF14009.8	PADRE	PADRE domain
gene_Solyc04g007800.5	Solyc04g007800.5	Calcium-dependent lipid-binding (CaLB domain) family protein (AHRD V3.11 *** tr|A0A2U1LCF2|A0A2U1LCF2_ARTAN)	27.46	29.51	31.94	53.28	17.95	48.6	45.62	77.41	55.15	19.87	19.21	10.25	29.6367	39.9433	59.3933	16.4433	GO:0009738;GO:0005634;GO:000588	BP:abscisic acid-activated signaling pathway;CC:nucleus;CC:plasma membrane;	------	------	------	------	COG5038	S:Function unknown	XP_004237015.1	protein C2-DOMAIN ABA-RELATED 7-like [Solanum lycopersicum]	sp|Q9SSL1|CAR7_ARATH;	Protein C2-DOMAIN ABA-RELATED 7 OS=Arabidopsis thaliana OX=3702 GN=CAR7 PE=1 SV=1;	PF00168.32	C2	C2 domain
gene_Solyc04g008100.3	Solyc04g008100.3	RING-type E3 ubiquitin transferase (AHRD V3.3 *** A0A2G2ZH40_CAPAN)	0.24	0.05	0.07	0.82	0.18	0.3	0.46	0.35	0.43	2.59	2.69	1.19	0.12	0.433333	0.413333	2.15667	GO:0016567;GO:000484	BP:protein ubiquitination;MF:ubiquitin-protein transferase activity;	------	------	------	------	ENOG410Y3P9	O:Posttranslational modification, protein turnover, chaperones	XP_004236923.1	U-box domain-containing protein 21 [Solanum lycopersicum]	sp|Q5PNY6|PUB21_ARATH;	U-box domain-containing protein 21 OS=Arabidopsis thaliana OX=3702 GN=PUB21 PE=2 SV=1;	PF04564.17;PF11789.10	U-box;zf-Nse	U-box domain;Zinc-finger of the MIZ type in Nse subunit
gene_Solyc04g008210.2	Solyc04g008210.2	ETAG-A3	88.47	102.97	69.93	182.96	64.76	179.21	48.09	68.94	41.63	20.76	12.07	13.84	87.1233	142.31	52.8867	15.5567	GO:0042546;GO:0005975;GO:0071555;GO:0010411;GO:0005618;GO:0016021;GO:0048046;GO:0016762;GO:000455	BP:cell wall biogenesis;BP:carbohydrate metabolic process;BP:cell wall organization;BP:xyloglucan metabolic process;CC:cell wall;CC:integral component of membrane;CC:apoplast;MF:xylogluca;MF:hydrolase activity, hydrolyzing O-glycosyl compounds;	K08235	E2.4.1.207	------	------	COG2273	G:Carbohydrate transport and metabolism	NP_001296719.1	probable xyloglucan endotransglucosylase/hydrolase protein 27 precursor [Solanum lycopersicum]	sp|Q8LDS2|XTH27_ARATH;	Probable xyloglucan endotransglucosylase/hydrolase protein 27 OS=Arabidopsis thaliana OX=3702 GN=XTH27 PE=2 SV=2;	PF00722.23;PF06955.14	Glyco_hydro_16;XET_C	Glycosyl hydrolases family 16;Xyloglucan endo-transglycosylase
gene_Solyc04g011770.2	Solyc04g011770.2	Unknown protein	4.69	4.06	2.86	2.37	1.34	1.75	0.8	1.99	1.55	4	4.94	3.66	3.87	1.82	1.44667	4.2	------	------	------	------	------	------	------	------	XP_004236723.1	uncharacterized protein LOC101253579 [Solanum lycopersicum]	------	------	------	------	------
gene_Solyc04g014400.4	Solyc04g014400.4	LOW QUALITY PROTEIN: LRR receptor-like serine/threonine-protein kinase GS.1	76.57	51.75	56.32	131.95	36.13	98.68	58.89	97.97	37.95	22.23	20.63	12.06	61.5467	88.92	64.9367	18.3067	GO:0016021;GO:0005886;GO:001630	CC:integral component of membrane;CC:plasma membrane;MF:kinase activity;	------	------	------	------	COG4886	S:Function unknown	XP_010319234.1	receptor-like protein 13 isoform X1 [Solanum lycopersicum]	sp|Q9C6A6|RLP13_ARATH;	Receptor-like protein 13 OS=Arabidopsis thaliana OX=3702 GN=RLP13 PE=3 SV=1;	PF13855.8;PF12799.9;PF13516.8	LRR_8;LRR_4;LRR_6	Leucine rich repeat;Leucine Rich repeats;Leucine Rich repeat
gene_Solyc04g014800.3	Solyc04g014800.3	myo-inositol monophosphatase 1	12.94	15.29	13.82	14.5	9.96	15.64	17.25	20.64	11.48	6.12	6.2	4.88	14.0167	13.3667	16.4567	5.73333	GO:0019853;GO:0046855;GO:0080167;GO:0007165;GO:0009409;GO:0006020;GO:0006021;GO:0046854;GO:0005886;GO:0005829;GO:0008934;GO:0046872;GO:0000287;GO:0052834;GO:0052832;GO:0052833;GO:0004869;GO:001034	BP:L-ascorbic acid biosynthetic process;BP:inositol phosphate dephosphorylation;BP:response to karrikin;BP:signal transduction;BP:response to cold;BP:inositol metabolic process;BP:inositol biosynthetic process;BP:phosphatidylinositol phosphorylation;CC:plasma membrane;CC:cytosol;MF:inositol monophosphate 1-phosphatase activity;MF:metal ion binding;MF:magnesium ion binding;MF:inositol monophosphat…	K10047	VTC4	map04070;map01240;map00053;map00562	Phosphatidylinositol signaling system;Biosynthesis of cofactors;Ascorbate and aldarate metabolism;Inositol phosphate metabolism	COG0483	G:Carbohydrate transport and metabolism	NP_001233901.1	inositol monophosphatase 1 [Solanum lycopersicum]	sp|P54926|IMP1_SOLLC;	Inositol monophosphatase 1 OS=Solanum lycopersicum OX=4081 GN=IMP1 PE=1 SV=1;	PF00459.27	Inositol_P	Inositol monophosphatase family
gene_Solyc04g040130.1	Solyc04g040130.1	Fatty acid desaturase (AHRD V3.3 *** E7CCD0_CAMMC)	2.83	1.39	1.36	11.22	6.69	9.32	7.12	12.78	4.85	3.31	3.45	1.45	1.86	9.07667	8.25	2.73667	GO:0006629;GO:0016021;GO:001671	BP:lipid metabolic process;CC:integral component of membrane;MF:oxidoreductase activity, acting on paired donors, with oxidation of a pair of donors resulting in the reduction of molecular oxygen to two molecules of water;	K10256	FAD2	map01040	Biosynthesis of unsaturated fatty acids	COG3239	I:Lipid transport and metabolism	XP_025886451.1	delta(12)-fatty-acid desaturase FAD2-like [Solanum lycopersicum]	sp|Q8GZC3|FAD2_VERFO;	Delt;	PF00487.26;PF11960.10	FA_desaturase;DUF3474	Fatty acid desaturase;Domain of unknown function
gene_Solyc04g048900.3	Solyc04g048900.3	Calreticulin (AHRD V3.3 *** A0A2G3ASL1_CAPCH)	135.07	104.12	110.21	244.01	141.76	210.1	189.07	340.42	130	87.98	102.06	64.86	116.467	198.623	219.83	84.9667	GO:0006457;GO:0030968;GO:0005783;GO:0005788;GO:0005789;GO:0051082;GO:000550	BP:protein folding;BP:endoplasmic reticulum unfolded protein response;CC:endoplasmic reticulum;CC:endoplasmic reticulum lumen;CC:endoplasmic reticulum membrane;MF:unfolded protein binding;MF:calcium ion binding;	K08057	CALR	map04145;map04141	Phagosome;Protein processing in endoplasmic reticulum	ENOG410XRR7	O:Posttranslational modification, protein turnover, chaperones	XP_004237555.1	calreticulin-3-like [Solanum lycopersicum]	sp|O04153|CALR3_ARATH;	Calreticulin-3 OS=Arabidopsis thaliana OX=3702 GN=CRT3 PE=1 SV=2;	PF00262.20	Calreticulin	Calreticulin family
gene_Solyc04g050860.4	Solyc04g050860.4	Myo-inositol-1-phosphate synthase (AHRD V3.11 *-* tr|Q2MJR3|Q2MJR3_SOYBN)	0	0	0.03	0	0.02	0.06	0	0	0.08	0.3	0.65	0.28	0.01	0.026667	0.026667	0.41	GO:0006021;GO:0008654;GO:0005737;GO:000451	BP:inositol biosynthetic process;BP:phospholipid biosynthetic process;CC:cytoplasm;MF:inositol-3-phosphate synthase activity;	K01858	INO1, ISYNA1	map00562	Inositol phosphate metabolism	COG1260	I:Lipid transport and metabolism	XP_006366474.1	PREDICTED: inositol-3-phosphate synthase [Solanum tuberosum]	sp|Q9LW96|INO1_TOBAC;	Inositol-3-phosphate synthase OS=Nicotiana tabacum OX=4097 PE=2 SV=1;	PF07994.14	NAD_binding_5	Myo-inositol-1-phosphate synthase
gene_Solyc04g051280.5	Solyc04g051280.5	nucleolin Chr1:24180973-24182668 REVERSE LENGTH=288 201606 (AHRD V3.11 *-* AT1G65090.3)	1.63	1.32	3.01	2.49	3.12	2.4	2.2	1.91	2.53	7.86	17.03	9.19	1.98667	2.67	2.21333	11.36	GO:000374	MF:translation initiation factor activity;	------	------	------	------	ENOG410ZF20	S:Function unknown	XP_010319806.1	uncharacterized protein LOC101264922 isoform X1 [Solanum lycopersicum]	------	------	------	------	------
gene_Solyc04g056340.4	Solyc04g056340.4	Tyrosine phosphatase family protein (AHRD V3.3 *** A0A2U1PX48_ARTAN)	14.3	17.7	16.8	26.86	19.9	27.54	21.61	26.86	19.22	10.51	11.49	8.35	16.2667	24.7667	22.5633	10.1167	GO:0005737;GO:000472	CC:cytoplasm;MF:protein tyrosine phosphatase activity;	K18045	SIW14, OCA3	------	------	COG2365	T:Signal transduction mechanisms	XP_004237383.1	tyrosine-protein phosphatase DSP3 [Solanum lycopersicum]	sp|Q681Z2|DSP3_ARATH;	Tyrosine-protein phosphatase DSP3 OS=Arabidopsis thaliana OX=3702 GN=DSP3 PE=1 SV=1;	PF03162.15;PF13350.8;PF00782.22	Y_phosphatase2;Y_phosphatase3;DSPc	Tyrosine phosphatase family;Tyrosine phosphatase family;Dual specificity phosphatase, catalytic domain
gene_Solyc04g064530.1	Solyc04g064530.1	polyadenylate-binding protein 1-B-binding protein (AHRD V3.3 *** AT4G19950.1)	69.54	61.99	68.39	131.67	86.04	115.65	106.58	164.95	71.15	47.72	47.07	28.64	66.64	111.12	114.227	41.1433	GO:0016021;GO:000552	CC:integral component of membrane;MF:ATP binding;	------	------	------	------	ENOG410YFUQ	S:Function unknown	XP_004237719.1	uncharacterized protein LOC101258062 [Solanum lycopersicum]	------	------	------	------	------
gene_Solyc04g071660.3	Solyc04g071660.3	hypothetical protein (AHRD V3.3 *-* AT1G76740.1)	3.99	3.78	6.47	3.3	7.84	3.93	6.61	1.89	6.34	7.15	14	14.75	4.74667	5.02333	4.94667	11.9667	------	------	------	------	------	------	ENOG4111CMC	S:Function unknown	XP_010320101.1	uncharacterized protein LOC101253281 isoform X4 [Solanum lycopersicum]	------	------	------	------	------
gene_Solyc04g071900.5	Solyc04g071900.5	Peroxidase (AHRD V3.11 *** tr|K4BTH7|K4BTH7_SOLLC)	11.81	4.84	7	12.91	5.34	8.22	5.49	9.71	4.53	21.09	36.71	15.59	7.88333	8.82333	6.57667	24.4633	GO:0006979;GO:0042744;GO:0055114;GO:0016021;GO:0005576;GO:0009505;GO:0009506;GO:0020037;GO:0046872;GO:000460	BP:response to oxidative stress;BP:hydrogen peroxide catabolic process;BP:oxidation-reduction process;CC:integral component of membrane;CC:extracellular region;CC:plant-type cell wall;CC:plasmodesma;MF:heme binding;MF:metal ion binding;MF:peroxidase activity;	K00430	E1.11.1.7	map00940	Phenylpropanoid biosynthesis	ENOG410ZMT4	G:Carbohydrate transport and metabolism	NP_001334412.1	peroxidase 12 precursor [Solanum lycopersicum]	sp|Q96520|PER12_ARATH;	Peroxidase 12 OS=Arabidopsis thaliana OX=3702 GN=PER12 PE=1 SV=1;	PF00141.25	peroxidase	Peroxidase
gene_Solyc04g072700.4	Solyc04g072700.4	Heavy metal-associated isoprenylated plant protein (AHRD V3.3 *** A0A2R6RNU7_ACTCH)	1.29	1.41	0.81	0.96	0.7	2.48	2.09	2.81	0.68	0.26	0.26	0.56	1.17	1.38	1.86	0.36	GO:0030001;GO:004687	BP:metal ion transport;MF:metal ion binding;	------	------	------	------	COG2608	S:Function unknown	XP_010320148.1	heavy metal-associated isoprenylated plant protein 24 isoform X2 [Solanum lycopersicum]	sp|O81464|HIP24_ARATH;	Heavy metal-associated isoprenylated plant protein 24 OS=Arabidopsis thaliana OX=3702 GN=HIPP24 PE=1 SV=1;	PF00403.28	HMA	Heavy-metal-associated domain
gene_Solyc04g074000.3	Solyc04g074000.3	Receptor protein kinase, putative (AHRD V3.3 *** A0A061FG24_THECC)	38.89	27.44	34.38	79.53	19.82	46.09	45.94	87.01	21.88	10.7	12.44	4.77	33.57	48.48	51.61	9.30333	GO:0006468;GO:0046777;GO:0016021;GO:0005886;GO:0004672;GO:0004674;GO:000552	BP:protein phosphorylation;BP:protein autophosphorylation;CC:integral component of membrane;CC:plasma membrane;MF:protein kinase activity;MF:protein serine/threonine kinase activity;MF:ATP binding;	------	------	------	------	COG4886	S:Function unknown	XP_010320167.1	MDIS1-interacting receptor like kinase 2-like [Solanum lycopersicum]	sp|Q8VZG8|MIK2_ARATH;	MDIS1-interacting receptor like kinase 2 OS=Arabidopsis thaliana OX=3702 GN=MIK2 PE=1 SV=3;	PF13855.8;PF00069.27;PF07714.19;PF12799.9;PF08263.14	LRR_8;Pkinase;PK_Tyr_Ser-Thr;LRR_4;LRRNT_2	Leucine rich repeat;Protein kinase domain;Protein tyrosine and serine/threonine kinase;Leucine Rich repeats;Leucine rich repeat N-terminal domain
gene_Solyc04g074030.3	Solyc04g074030.3	Receptor protein kinase, putative (AHRD V3.3 *** A0A061FG24_THECC)	0.83	0.31	0.83	0.77	0.23	0.44	1.04	0.77	0.41	0.02	0.13	0.06	0.656667	0.48	0.74	0.07	GO:0006468;GO:0046777;GO:0016021;GO:0005886;GO:0004672;GO:0004674;GO:000552	BP:protein phosphorylation;BP:protein autophosphorylation;CC:integral component of membrane;CC:plasma membrane;MF:protein kinase activity;MF:protein serine/threonine kinase activity;MF:ATP binding;	------	------	------	------	COG4886	S:Function unknown	XP_010320167.1	MDIS1-interacting receptor like kinase 2-like [Solanum lycopersicum]	sp|Q8VZG8|MIK2_ARATH;	MDIS1-interacting receptor like kinase 2 OS=Arabidopsis thaliana OX=3702 GN=MIK2 PE=1 SV=3;	PF00069.27;PF07714.19;PF13855.8;PF12799.9;PF08263.14	Pkinase;PK_Tyr_Ser-Thr;LRR_8;LRR_4;LRRNT_2	Protein kinase domain;Protein tyrosine and serine/threonine kinase;Leucine rich repeat;Leucine Rich repeats;Leucine rich repeat N-terminal domain
gene_Solyc04g074850.3	Solyc04g074850.3	ripening regulated protein DDTFR18	44.32	38.65	36.41	22.32	10.64	16.85	14.33	22.13	15.26	10.34	9.32	4.31	39.7933	16.6033	17.24	7.99	GO:0006855;GO:0055085;GO:0016021;GO:0016020;GO:0015297;GO:0015238;GO:0022857;GO:004291	BP:drug transmembrane transport;BP:transmembrane transport;CC:integral component of membrane;CC:membrane;MF:antiporter activity;MF:drug transmembrane transporter activity;MF:transmembrane transporter activity;MF:xenobiotic transporter activity;	K03327	TC.MATE, SLC47A, norM, mdtK, dinF	------	------	COG0534	V:Defense mechanisms	NP_001234398.2	ripening regulated protein DDTFR18 [Solanum lycopersicum]	sp|Q9FKQ1|DTX27_ARATH;	Protein DETOXIFICATION 27 OS=Arabidopsis thaliana OX=3702 GN=DTX27 PE=2 SV=1;	PF01554.20	MatE	MatE
gene_Solyc04g074880.2	Solyc04g074880.2	purine permease 3-like (AHRD V3.3 *** A0A2G2ZQS5_CAPAN),Pfam:PF16913	0.57	0.11	0.42	0.21	0.05	0.07	0.16	0.07	0.13	0.38	3.04	0.35	0.366667	0.11	0.12	1.25667	GO:0016021;GO:001521	CC:integral component of membrane;MF:purine nucleoside transmembrane transporter activity;	------	------	------	------	ENOG410Y9BB	U:Intracellular trafficking, secretion, and vesicular transport	XP_004237962.1	purine permease 3-like [Solanum lycopersicum]	sp|Q9FZ95|PUP3_ARATH;	Purine permease 3 OS=Arabidopsis thaliana OX=3702 GN=PUP3 PE=2 SV=1;	PF16913.7;PF04142.17;PF00892.22	PUNUT;Nuc_sug_transp;EamA	Purine nucleobase transmembrane transport;Nucleotide-sugar transporter;EamA-like transporter family
gene_Solyc04g076310.4	Solyc04g076310.4	Kinesin-like protein FR.1	2.93	2.7	4.94	2.65	5.37	2.13	4.24	1.31	3.81	4.87	8.51	10.15	3.52333	3.38333	3.12	7.84333	GO:0007018;GO:0007052;GO:0008017;GO:0003777;GO:1990939;GO:000552	BP:microtubule-based movement;BP:mitotic spindle organization;MF:microtubule binding;MF:microtubule motor activity;MF:ATP-dependent microtubule motor activity;MF:ATP binding;	------	------	------	------	COG5059	Z:Cytoskeleton	XP_010320210.1	kinesin-like protein KIN-4C [Solanum lycopersicum]	sp|F4K0J3|KN4C_ARATH;	Kinesin-like protein KIN-4C OS=Arabidopsis thaliana OX=3702 GN=KIN4C PE=2 SV=2;	PF00225.25;PF16796.7	Kinesin;Microtub_bd	Kinesin motor domain;Microtubule binding
gene_Solyc04g076860.3	Solyc04g076860.3	Zinc finger (C3HC4-type RING finger) family protein (AHRD V3.3 *** A0A2K3NFC1_TRIPR)	1.09	2.6	4.6	1.38	2.7	1.26	2.63	0.92	3.75	3.22	12.82	7.51	2.76333	1.78	2.43333	7.85	GO:0009630;GO:0048364;GO:0005886;GO:006163	BP:gravitropism;BP:root development;CC:plasma membrane;MF:ubiquitin protein ligase activity;	------	------	------	------	COG2304	S:Function unknown	XP_004238035.1	E3 ubiquitin-protein ligase WAV3 [Solanum lycopersicum]	sp|Q9LTA6|WAV3_ARATH;	E3 ubiquitin-protein ligase WAV3 OS=Arabidopsis thaliana OX=3702 GN=WAV3 PE=1 SV=1;	PF13519.8;PF00092.30;PF13768.8;PF17123.7;PF13639.8;PF05762.16;PF12678.9;PF00097.27;PF13923.8;PF12861.9;PF14634.8;PF13445.8	VWA_2;VWA;VWA_3;zf-RING_11;zf-RING_2;VWA_CoxE;zf-rbx1;zf-C3HC4;zf-C3HC4_2;zf-ANAPC11;zf-RING_5;zf-RING_UBOX	von Willebrand factor type A domain;von Willebrand factor type A domain;von Willebrand factor type A domain;RING-like zinc finger;Ring finger domain;VWA domain containing CoxE-like protein;RING-H2 zinc finger domain;Zinc finger, C3HC4 type;Zinc finger, C3HC4 type;Anaphase-promoting complex subunit 11 RING-H2 finger;zinc-RING finger domain;RING-type zinc-finger
gene_Solyc04g077310.4	Solyc04g077310.4	G-type lectin S-receptor-like serine/threonine-protein kinase (AHRD V3.11 *-* tr|A0A2G3BAY7|A0A2G3BAY7_CAPCH)	2.9	2.67	4.3	3.31	1.31	2.43	2.93	2.31	1.74	1.03	1.21	0.96	3.29	2.35	2.32667	1.06667	GO:0048544;GO:0016021;GO:0030246;GO:0004674;GO:0005524;GO:0004672;GO:0106310;GO:010631	BP:recognition of pollen;CC:integral component of membrane;MF:carbohydrate binding;MF:protein serine/threonine kinase activity;MF:ATP binding;MF:protein kinase activity;MF:old GO;MF:old GO;	------	------	------	------	COG0515	T:Signal transduction mechanisms	KAG5612913.1	hypothetical protein H5410_024194 [Solanum commersonii]	sp|O81832|Y4729_ARATH;	G-type lectin S-receptor-like serine/threonine-protein kinase At4g27290 OS=Arabidopsis thaliana OX=3702 GN=At4g27290 PE=3 SV=4;	PF01453.26;PF00954.22;PF07714.19;PF00069.27;PF08276.13;PF11883.10	B_lectin;S_locus_glycop;PK_Tyr_Ser-Thr;Pkinase;PAN_2;DUF3403	D-mannose binding lectin;S-locus glycoprotein domain;Protein tyrosine and serine/threonine kinase;Protein kinase domain;PAN-like domain;Domain of unknown function
gene_Solyc04g077540.4	Solyc04g077540.4	Kinesin-like protein (AHRD V3.3 *** A0A2G2ZR89_CAPAN)	2.28	2.77	3.89	1.54	3.41	1.93	3.05	1.18	3.28	3.31	6.79	6.71	2.98	2.29333	2.50333	5.60333	GO:0007018;GO:0005874;GO:1990939;GO:0008017;GO:0005524;GO:000377	BP:microtubule-based movement;CC:microtubule;MF:ATP-dependent microtubule motor activity;MF:microtubule binding;MF:ATP binding;MF:microtubule motor activity;	K11498	CENPE	------	------	COG5059	Z:Cytoskeleton	XP_004238068.1	kinesin-like protein KIN-7N [Solanum lycopersicum]	sp|Q9S7P3|KN7N_ARATH;	Kinesin-like protein KIN-7N OS=Arabidopsis thaliana OX=3702 GN=KIN7N PE=2 SV=1;	PF00225.25	Kinesin	Kinesin motor domain
gene_Solyc04g079210.3	Solyc04g079210.3	Patatin (AHRD V3.3 *** A0A2G2X0P8_CAPBA)	16.39	29.63	26.51	124.95	45	93.23	78.88	115.85	52.19	41.33	42.82	23.51	24.1767	87.7267	82.3067	35.8867	GO:0016042;GO:0005773;GO:0016787;GO:0045735;GO:0004620;GO:004737	BP:lipid catabolic process;CC:vacuole;MF:hydrolase activity;MF:nutrient reservoir activity;MF:phospholipase activity;MF:acylglycerol lipase activity;	------	------	------	------	COG3621	S:Function unknown	XP_015072153.1	patatin-like protein 2 [Solanum pennellii]	sp|O23181|PLP3_ARATH;	Patatin-like protein 3 OS=Arabidopsis thaliana OX=3702 GN=PLP3 PE=2 SV=2;	PF01734.24	Patatin	Patatin-like phospholipase
gene_Solyc04g079560.3	Solyc04g079560.3	Lysine histidine transporter-like 8 (AHRD V3.3 *** A0A1U8GKT6_CAPAN)	14.24	11.58	15.52	7.79	11.08	8.41	11.35	7.06	13.07	11.32	38.93	21.1	13.78	9.09333	10.4933	23.7833	GO:0006865;GO:0016021;GO:000588	BP:amino acid transport;CC:integral component of membrane;CC:plasma membrane;	------	------	------	------	COG0814	E:Amino acid transport and metabolism	XP_004238196.1	lysine histidine transporter-like 8 [Solanum lycopersicum]	sp|Q9SX98|LHTL8_ARATH;	Lysine histidine transporter-like 8 OS=Arabidopsis thaliana OX=3702 GN=AATL1 PE=1 SV=1;	PF01490.20	Aa_trans	Transmembrane amino acid transporter protein
gene_Solyc04g082030.1	Solyc04g082030.1	ornithine decarboxylase	37.05	29.79	35.43	35.01	45.48	23.52	44.63	27.74	77.44	127.59	97.3	164.47	34.09	34.67	49.9367	129.787	GO:0006596;GO:0033387;GO:0005737;GO:0004586;GO:000382	BP:polyamine biosynthetic process;BP:putrescine biosynthetic process from ornithine;CC:cytoplasm;MF:ornithine decarboxylase activity;MF:catalytic activity;	K01581	E4.1.1.17, ODC1, speC, speF	map00480;map00330	Glutathione metabolism;Arginine and proline metabolism	COG0019	E:Amino acid transport and metabolism	NP_001234616.1	ornithine decarboxylase [Solanum lycopersicum]	sp|O22616|DCOR_SOLLC;	Ornithine decarboxylase OS=Solanum lycopersicum OX=4081 GN=ODC PE=2 SV=2;	PF02784.18;PF00278.24	Orn_Arg_deC_N;Orn_DAP_Arg_deC	Pyridoxal-dependent decarboxylase, pyridoxal binding domain;Pyridoxal-dependent decarboxylase, C-terminal sheet domain
gene_Solyc05g006750.3	Solyc05g006750.3	Glutathione S-transferase (AHRD V3.3 *** A0A200QY01_9MAGN)	9.85	10.12	11.6	5.65	1.82	3.42	2	4.62	3.69	0.94	0.78	0.37	10.5233	3.63	3.43667	0.696667	GO:0006749;GO:0005737;GO:0016740;GO:0004364;GO:000551	BP:glutathione metabolic process;CC:cytoplasm;MF:transferase activity;MF:glutathione transferase activity;MF:protein binding;	K00799	GST, gst	map00480	Glutathione metabolism	ENOG410XSIX	O:Posttranslational modification, protein turnover, chaperones	XP_004238745.1	glutathione S-transferase U17 [Solanum lycopersicum]	sp|Q9FUS8|GSTUH_ARATH;	Glutathione S-transferase U17 OS=Arabidopsis thaliana OX=3702 GN=GSTU17 PE=2 SV=1;	PF02798.22;PF13417.8;PF13409.8;PF00043.27	GST_N;GST_N_3;GST_N_2;GST_C	Glutathione S-transferase, N-terminal domain;Glutathione S-transferase, N-terminal domain;Glutathione S-transferase, N-terminal domain;Glutathione S-transferase, C-terminal domain
gene_Solyc05g007760.2	Solyc05g007760.2	SET domain (AHRD V3.3 *** A0A200QP09_9MAGN)	1.7	1.63	2.18	0.75	1.15	0.81	1.57	0.56	1.21	1.78	3.56	3.17	1.83667	0.903333	1.11333	2.83667	GO:000551	MF:protein binding;	------	------	------	------	COG2940	S:Function unknown	XP_010320689.1	uncharacterized protein LOC101244286 [Solanum lycopersicum]	sp|I1R9A9|GRA4_GIBZE;	Methyltransferase FGSG_00040 OS=Gibberella zeae;	PF00856.30;PF00515.30	SET;TPR_1	SET domain;Tetratricopeptide repeat
gene_Solyc05g008960.3	Solyc05g008960.3	Protein kinase family protein (AHRD V3.3 *** A0A1P8BDJ0_ARATH)	3.25	2.44	4.12	11.38	4.14	9.65	6	10.43	2.89	1.89	1.7	1.6	3.27	8.39	6.44	1.73	GO:0006468;GO:0016310;GO:0016021;GO:0016301;GO:0004672;GO:000552	BP:protein phosphorylation;BP:phosphorylation;CC:integral component of membrane;MF:kinase activity;MF:protein kinase activity;MF:ATP binding;	------	------	------	------	COG0515	T:Signal transduction mechanisms	XP_004238902.1	LEAF RUST 10 DISEASE-RESISTANCE LOCUS RECEPTOR-LIKE PROTEIN KINASE-like 1.1 [Solanum lycopersicum]	sp|Q9C6K9|LRL11_ARATH;	LEAF RUST 10 DISEASE-RESISTANCE LOCUS RECEPTOR-LIKE PROTEIN KINASE-like 1.1 OS=Arabidopsis thaliana OX=3702 GN=LRK10L-1.1 PE=2 SV=1;	PF00069.27;PF07714.19;PF14380.8	Pkinase;PK_Tyr_Ser-Thr;WAK_assoc	Protein kinase domain;Protein tyrosine and serine/threonine kinase;Wall-associated receptor kinase C-terminal
gene_Solyc05g008980.2	Solyc05g008980.2	Protein kinase family protein (AHRD V3.3 *** A0A2U1MH78_ARTAN)	7.16	4.83	6.29	14.03	6.5	10.54	11.79	16.64	7.11	5.35	5.12	3.48	6.09333	10.3567	11.8467	4.65	GO:0006468;GO:0016310;GO:0016021;GO:0016301;GO:0004672;GO:000552	BP:protein phosphorylation;BP:phosphorylation;CC:integral component of membrane;MF:kinase activity;MF:protein kinase activity;MF:ATP binding;	------	------	------	------	COG0515	T:Signal transduction mechanisms	XP_004239409.1	LEAF RUST 10 DISEASE-RESISTANCE LOCUS RECEPTOR-LIKE PROTEIN KINASE-like 1.1 [Solanum lycopersicum]	sp|Q9C6K9|LRL11_ARATH;	LEAF RUST 10 DISEASE-RESISTANCE LOCUS RECEPTOR-LIKE PROTEIN KINASE-like 1.1 OS=Arabidopsis thaliana OX=3702 GN=LRK10L-1.1 PE=2 SV=1;	PF00069.27;PF07714.19;PF14380.8;PF03109.18;PF14531.8	Pkinase;PK_Tyr_Ser-Thr;WAK_assoc;ABC1;Kinase-like	Protein kinase domain;Protein tyrosine and serine/threonine kinase;Wall-associated receptor kinase C-terminal;ABC1 atypical kinase-like domain;Kinase-like
gene_Solyc05g009040.3	Solyc05g009040.3	Receptor-like protein kinase (AHRD V3.3 *** D3G6F0_CAPAN)	6.45	5.02	3.6	18.85	3.15	9.62	8.92	15.52	4.2	1.79	1.95	0.77	5.02333	10.54	9.54667	1.50333	GO:0006468;GO:0016021;GO:0004674;GO:0005524;GO:000467	BP:protein phosphorylation;CC:integral component of membrane;MF:protein serine/threonine kinase activity;MF:ATP binding;MF:protein kinase activity;	------	------	------	------	COG0515	T:Signal transduction mechanisms	XP_019069573.2	LOW QUALITY PROTEIN: uncharacterized protein LOC101268684 [Solanum lycopersicum]	sp|P93604|LRK10_WHEAT;	Rust resistance kinase Lr10 OS=Triticum aestivum OX=4565 GN=LRK10 PE=2 SV=1;	PF07714.19;PF00069.27;PF03109.18;PF14380.8	PK_Tyr_Ser-Thr;Pkinase;ABC1;WAK_assoc	Protein tyrosine and serine/threonine kinase;Protein kinase domain;ABC1 atypical kinase-like domain;Wall-associated receptor kinase C-terminal
gene_Solyc05g010040.2	Solyc05g010040.2	Unknown protein	34.64	32.87	42.48	82.94	30.53	69.85	58.15	108.21	47.18	24.99	26.98	14.72	36.6633	61.1067	71.18	22.23	------	------	K03574	mutT, NUDT15, MTH2	------	------	------	------	XP_015075084.1	uncharacterized protein LOC107019012 isoform X1 [Solanum pennellii]	------	------	------	------	------
gene_Solyc05g010420.2	Solyc05g010420.2	S-adenosylmethionine decarboxylase	179.43	145.01	181.99	246.14	358.53	210.06	301.39	235.42	472.07	814.04	629.15	968.39	168.81	271.577	336.293	803.86	GO:0006557;GO:0008295;GO:0006597;GO:0005829;GO:000401	BP:S-adenosylmethioninamine biosynthetic process;BP:spermidine biosynthetic process;BP:spermine biosynthetic process;CC:cytosol;MF:adenosylmethionine decarboxylase activity;	K01611	speD, AMD1	map00270;map00330	Cysteine and methionine metabolism;Arginine and proline metabolism	ENOG410XRN0	E:Amino acid transport and metabolism	NP_001234699.1	S-adenosylmethionine decarboxylase [Solanum lycopersicum]	sp|Q38IY3|DCAM_SOLCI;	S-adenosylmethionine decarboxylase proenzyme OS=Solanum chilense OX=4083 GN=SAMDC PE=2 SV=1;	PF01536.18	SAM_decarbox	Adenosylmethionine decarboxylase
gene_Solyc05g010425.1	Solyc05g010425.1	S-adenosylmethionine decarboxylase (AHRD V3.3 *-* Q6KC47_PRUPE)	540.27	415.62	463.81	552.93	749.78	356.81	639.86	483.49	1134.05	1585.77	1252.5	1998.02	473.233	553.173	752.467	1612.1	------	------	------	------	------	------	ENOG410Z6HC	S:Function unknown	BBG94399.1	Adenosylmethionine decarboxylase family protein [Prunus dulcis]	------	------	PF08132.13	AdoMetDC_leader	S-adenosyl-l-methionine decarboxylase leader peptide
gene_Solyc05g012850.3	Solyc05g012850.3	transmembrane protein (AHRD V3.3 *-* AT3G11810.1)	7.37	5.78	4	34.26	15.09	20.21	19.61	29.84	10.67	8.33	6.16	4.04	5.71667	23.1867	20.04	6.17667	GO:001602	CC:integral component of membrane;	------	------	------	------	ENOG41104RA;ENOG410YKVG	S:Function unknown;	XP_004239095.1	uncharacterized protein LOC101256182 [Solanum lycopersicum]	------	------	------	------	------
gene_Solyc05g012950.3	Solyc05g012950.3	Sulfotransferase (AHRD V3.3 *-* A0A200QN29_9MAGN)	0	0	1.13	0	1.4	0	1.02	0	0.68	4.08	2.26	8.96	0.376667	0.466667	0.566667	5.1	GO:0051923;GO:0005737;GO:000814	BP:sulfation;CC:cytoplasm;MF:sulfotransferase activity;	K01025	SULT1	------	------	ENOG4111H56	S:Function unknown	XP_025886869.1	cytosolic sulfotransferase 5 isoform X4 [Solanum lycopersicum]	sp|Q9FX56|SOT8_ARATH;	Cytosolic sulfotransferase 8 OS=Arabidopsis thaliana OX=3702 GN=SOT8 PE=2 SV=1;	PF00685.29	Sulfotransfer_1	Sulfotransferase domain
gene_Solyc05g013530.4	Solyc05g013530.4	Octicosapeptide/phox/Bem1p domain kinase superfamily protein (AHRD V3.3 *-* A0A2K3NXA6_TRIPR)	92.32	102.58	96.14	101.63	62.17	120.81	85.31	115.69	90.11	35.91	29.99	16.86	97.0133	94.87	97.0367	27.5867	GO:000551	MF:protein binding;	------	------	------	------	ENOG410YQPQ	S:Function unknown	XP_010320935.1	uncharacterized protein LOC101267605 isoform X1 [Solanum lycopersicum]	------	------	PF00564.26	PB1	PB1 domain
gene_Solyc05g014270.4	Solyc05g014270.4	TPX2 (Targeting protein for Xklp2) protein family (AHRD V3.3 *-* Q84JG6_ARATH)	0.82	1.6	2.64	0.64	1.47	0.58	1.01	0.87	1.26	1.27	3.2	3.3	1.68667	0.896667	1.04667	2.59	GO:0005737;GO:000587	CC:cytoplasm;CC:microtubule;	------	------	------	------	ENOG4111BVH;ENOG410YSYI	S:Function unknown;	XP_004239498.2	protein WVD2-like 7 isoform X1 [Solanum lycopersicum]	sp|Q67Y69|WDL7_ARATH;	Protein WVD2-like 7 OS=Arabidopsis thaliana OX=3702 GN=WDL7 PE=2 SV=1;	PF06886.13	TPX2	Targeting protein for Xklp2
gene_Solyc05g015780.1	Solyc05g015780.1	Unknown protein	0	0	0	0	0	0	0	0	0	1.78	1.45	0.8	0	0	0	1.34333	GO:0006400;GO:001676	BP:tRNA modification;MF:transferase activity, transferring pentosyl groups;	K00777	QTRT1	------	------	COG0343	J:Translation, ribosomal structure and biogenesis	EYU36480.1	hypothetical protein MIMGU_mgv1a0262791mg, partial [Erythranthe guttata]	sp|A8X0P0|TGT_CAEBR;	Queuine tRNA-ribosyltransferase catalytic subunit OS=Caenorhabditis briggsae OX=6238 GN=tgt-1 PE=3 SV=2;	------	------	------
gene_Solyc05g018060.1	Solyc05g018060.1	Unknown protein	0	0	0.04	0	0	0	0	0	0	10.05	5.97	3.82	0.013333	0	0	6.61333	------	------	------	------	------	------	------	------	TMX05604.1	hypothetical protein EJD97_016000, partial [Solanum chilense]	------	------	------	------	------
gene_Solyc05g021245.1	Solyc05g021245.1	Unknown protein	2.76	0.27	0.19	2.26	0.64	1	1.53	1.07	1.26	0.21	0	0.08	1.07333	1.3	1.28667	0.096667	------	------	------	------	------	------	------	------	------	------	------	------	------	------	------
gene_Solyc05g043390.2	Solyc05g043390.2	U-box domain-containing protein 35 (AHRD V3.3 *-* A0A2G3ANR8_CAPAN)	0.51	0.49	0.81	0.75	0.71	1.25	1.17	0.68	0.85	2.15	1.35	1.29	0.603333	0.903333	0.9	1.59667	GO:0051287;GO:0005524;GO:000467	MF:NAD binding;MF:ATP binding;MF:protein kinase activity;	------	------	------	------	------	------	KAF3651086.1	hypothetical protein FXO38_16793 [Capsicum annuum]	------	------	------	------	------
gene_Solyc05g047680.4	Solyc05g047680.4	Cytochrome P450 (AHRD V3.3 *** A0A2U1MQN4_ARTAN)	0.31	0.81	0.86	6.21	1.21	4.12	4.01	4.15	5.4	1.46	1.33	0.85	0.66	3.84667	4.52	1.21333	GO:0055114;GO:0016021;GO:0004497;GO:0020037;GO:0016705;GO:000550	BP:oxidation-reduction process;CC:integral component of membrane;MF:monooxygenase activity;MF:heme binding;MF:oxidoreductase activity, acting on paired donors, with incorporation or reduction of molecular oxygen;MF:iron ion binding;	K20619	CYP78A	------	------	COG2124	Q:Secondary metabolites biosynthesis, transport and catabolism	XP_004240114.1	cytochrome P450 78A9 [Solanum lycopersicum]	sp|Q9SLP1|C78A9_ARATH;	Cytochrome P450 78A9 OS=Arabidopsis thaliana OX=3702 GN=CYP78A9 PE=1 SV=1;	PF00067.24	p450	Cytochrome P450
gene_Solyc05g048800.4	Solyc05g048800.4	O-glucosyltransferase rumi-like protein (DUF821) (AHRD V3.11 *** tr|A0A1I9LS97|A0A1I9LS97_ARATH)	1.38	0.54	1.08	0.24	0.77	0.82	1.01	0.77	1.08	1.69	1.62	2.31	1	0.61	0.953333	1.87333	GO:0016021;GO:001674	CC:integral component of membrane;MF:transferase activity;	------	------	------	------	ENOG410XT5U	S:Function unknown	XP_015075855.2	O-glucosyltransferase rumi homolog [Solanum pennellii]	sp|Q8NBL1|PGLT1_HUMAN;	Protein O-glucosyltransferase 1 OS=Homo sapiens OX=9606 GN=POGLUT1 PE=1 SV=1;	PF05686.14	Glyco_transf_90	Glycosyl transferase family 90
gene_Solyc05g049980.3	Solyc05g049980.3	Pectin lyase-like superfamily protein (AHRD V3.3 *** A0A1I9LS88_ARATH)	7.74	7.38	12.58	5.37	5.35	3.49	5.38	3.31	5.22	9.75	10.57	16.62	9.23333	4.73667	4.63667	12.3133	GO:0005975;GO:0005618;GO:000465	BP:carbohydrate metabolic process;CC:cell wall;MF:polygalacturonase activity;	------	------	------	------	COG5434	M:Cell wall/membrane/envelope biogenesis	XP_004240097.1	probable polygalacturonase [Solanum lycopersicum]	sp|A7PZL3|PGLR_VITVI;	Probable polygalacturonase OS=Vitis vinifera OX=29760 GN=GSVIVT00026920001 PE=1 SV=1;	PF00295.19;PF12708.9;PF13229.8	Glyco_hydro_28;Pectate_lyase_3;Beta_helix	Glycosyl hydrolases family 28;Pectate lyase superfamily protein;Right handed beta helix region
gene_Solyc05g050350.2	Solyc05g050350.2	Cyclic nucleotide-gated ion channel.1	1.06	0.86	0.75	2.1	2.24	2.28	1.9	3.41	0.86	0.48	0.81	0.45	0.89	2.20667	2.05667	0.58	GO:0006811;GO:0055085;GO:0016020;GO:0016021;GO:000521	BP:ion transport;BP:transmembrane transport;CC:membrane;CC:integral component of membrane;MF:ion channel activity;	K05391	CNGC	map04626	Plant-pathogen interaction	ENOG410XPSE	U:Intracellular trafficking, secretion, and vesicular transport	XP_010321519.1	cyclic nucleotide-gated ion channel 1-like [Solanum lycopersicum]	sp|O65717|CNGC1_ARATH;	Cyclic nucleotide-gated ion channel 1 OS=Arabidopsis thaliana OX=3702 GN=CNGC1 PE=1 SV=1;	PF00520.33;PF00027.31	Ion_trans;cNMP_binding	Ion transport protein;Cyclic nucleotide-binding domain
gene_Solyc05g050380.4	Solyc05g050380.4	Cyclic nucleotide-gated ion channel.1	66.32	56.14	56.05	124.17	81.91	104.71	91.62	123.49	52.63	31.86	38.01	26.05	59.5033	103.597	89.2467	31.9733	GO:0006811;GO:0055085;GO:0016020;GO:0016021;GO:000521	BP:ion transport;BP:transmembrane transport;CC:membrane;CC:integral component of membrane;MF:ion channel activity;	K05391	CNGC	map04626	Plant-pathogen interaction	ENOG410XPSE	U:Intracellular trafficking, secretion, and vesicular transport	XP_010321516.1	cyclic nucleotide-gated ion channel 1 isoform X2 [Solanum lycopersicum]	sp|Q9LD40|CNG13_ARATH;	Putative cyclic nucleotide-gated ion channel 13 OS=Arabidopsis thaliana OX=3702 GN=CNGC13 PE=3 SV=2;	PF00520.33;PF00027.31	Ion_trans;cNMP_binding	Ion transport protein;Cyclic nucleotide-binding domain
gene_Solyc05g050900.4	Solyc05g050900.4	Spindle and kinetochore-associated protein 1-like protein (AHRD V3.3 *** A0A2G2WSY2_CAPBA)	3.54	3.89	4.51	3.12	4.58	3	3.38	3.06	4.93	4.99	10.97	6.47	3.98	3.56667	3.79	7.47667	GO:0031110;GO:0000278;GO:0007059;GO:0051301;GO:0072686;GO:0000940;GO:0005876;GO:000801	BP:regulation of microtubule polymerization or depolymerization;BP:mitotic cell cycle;BP:chromosome segregation;BP:cell division;CC:mitotic spindle;CC:condensed chromosome outer kinetochore;CC:spindle microtubule;MF:microtubule binding;	------	------	------	------	ENOG4111IBI	S:Function unknown	XP_004240054.1	spindle and kinetochore-associated protein 1 homolog [Solanum lycopersicum]	sp|Q9LZZ7|SKA1_ARATH;	Spindle and kinetochore-associated protein 1 homolog OS=Arabidopsis thaliana OX=3702 GN=At3g60660 PE=2 SV=1;	PF07160.14	SKA1	Spindle and kinetochore-associated protein 1
gene_Solyc05g053600.3	Solyc05g053600.3	Pleiotropic drug resistance protein (AHRD V3.3 *** C8CA13_CUCSA)	0.75	0.42	0.82	3.67	1.24	2.45	1.56	1.66	1.13	0.5	0.54	0.3	0.663333	2.45333	1.45	0.446667	GO:0016020;GO:0016021;GO:0042626;GO:000552	CC:membrane;CC:integral component of membrane;MF:ATPase activity, coupled to transmembrane movement of substances;MF:ATP binding;	K08711	PDR, CDR1	map02010	ABC transporters	COG0842;COG1131	V:Defense mechanisms;	XP_004239865.1	pleiotropic drug resistance protein 1-like [Solanum lycopersicum]	sp|Q76CU2|PDR1_TOBAC;	Pleiotropic drug resistance protein 1 OS=Nicotiana tabacum OX=4097 GN=PDR1 PE=2 SV=1;	PF01061.26;PF00005.29;PF08370.13;PF19055.2;PF14510.8;PF13191.8	ABC2_membrane;ABC_tran;PDR_assoc;ABC2_membrane_7;ABC_trans_N;AAA_16	ABC-2 type transporter;ABC transporter;Plant PDR ABC transporter associated;ABC-2 type transporter;ABC-transporter N-terminal;AAA ATPase domain
gene_Solyc05g150123.1	Solyc05g150123.1	Unknown protein	0.23	0	0.09	0	0	0	0	0	0	31.84	19.59	14.44	0.106667	0	0	21.9567	------	------	------	------	------	------	------	------	XP_010315687.1	uncharacterized protein LOC104645557 [Solanum lycopersicum]	------	------	------	------	------
gene_Solyc05g160250.1	Solyc05g160250.1	protein NRT1/ PTR FAMILY 1.2-like (AHRD V3.11 *** tr|A0A2I4HMB7|A0A2I4HMB7_9ROSI)	1.25	1.1	1.51	2.07	2.86	1.52	2.57	1.57	2.94	5.74	3.26	4.4	1.28667	2.15	2.36	4.46667	GO:0006857;GO:0006817;GO:0055085;GO:0016021;GO:0016020;GO:0005886;GO:002285	BP:oligopeptide transport;BP:phosphate ion transport;BP:transmembrane transport;CC:integral component of membrane;CC:membrane;CC:plasma membrane;MF:transmembrane transporter activity;	K14638	SLC15A3_4, PHT	------	------	COG3104	E:Amino acid transport and metabolism	XP_004239355.3	protein NRT1/ PTR FAMILY 1.2-like isoform X1 [Solanum lycopersicum]	sp|Q9M817|PTR6_ARATH;	Protein NRT1/ PTR FAMILY 1.2 OS=Arabidopsis thaliana OX=3702 GN=NPF1.2 PE=1 SV=1;	PF00854.23	PTR2	POT family
gene_Solyc06g007580.1	Solyc06g007580.1	PDDEXK-like protein (AHRD V3.3 *** A0A2U1LF29_ARTAN)	1.55	1.81	4.38	3.61	6.02	3.55	3.05	0.49	5.86	10.16	64.77	17.31	2.58	4.39333	3.13333	30.7467	------	------	------	------	------	------	ENOG410YKZJ	S:Function unknown	XP_004240436.1	uncharacterized protein LOC101250804 [Solanum lycopersicum]	------	------	PF04720.14	PDDEXK_6	PDDEXK-like family of unknown function
gene_Solyc06g007610.3	Solyc06g007610.3	Glyoxalase-like domain (AHRD V3.11 *** tr|A0A200QDW9|A0A200QDW9_9MAGN)	1.14	0.96	8.63	1.72	8.68	1.88	2.33	0.86	7.35	50.86	111.25	65.86	3.57667	4.09333	3.51333	75.99	------	------	------	------	------	------	ENOG410YUXH	S:Function unknown	XP_004240438.1	uncharacterized protein At5g48480 [Solanum lycopersicum]	sp|Q9LV66|Y5848_ARATH;	Uncharacterized protein At5g48480 OS=Arabidopsis thaliana OX=3702 GN=At5g48480 PE=1 SV=1;	------	------	------
gene_Solyc06g008510.3	Solyc06g008510.3	Cdt1-like protein chloroplastic-like (AHRD V3.3 *** A0A2K3MWV0_TRIPR)	3.48	3.69	7.88	2.13	3.57	1.98	5.11	2.58	6.37	7.58	8.63	11.32	5.01667	2.56	4.68667	9.17667	GO:0000278;GO:0071163;GO:0030174;GO:0007049;GO:0000076;GO:0005634;GO:0070182;GO:000367	BP:mitotic cell cycle;BP:DNA replication preinitiation complex assembly;BP:regulation of DNA-dependent DNA replication initiation;BP:cell cycle;BP:DNA replication checkpoint;CC:nucleus;MF:DNA polymerase binding;MF:DNA binding;	K10727	CDT1	------	------	ENOG410XT37	L:Replication, recombination and repair	XP_010321830.1	CDT1-like protein a, chloroplastic [Solanum lycopersicum]	sp|Q9SJW9|CDT1A_ARATH;	CDT1-like protein a, chloroplastic OS=Arabidopsis thaliana OX=3702 GN=CDT1A PE=1 SV=1;	PF16679.7;PF08839.13	CDT1_C;CDT1	DNA replication factor Cdt1 C-terminal domain;DNA replication factor CDT1 like
gene_Solyc06g009110.3	Solyc06g009110.3	Eukaryotic aspartyl protease family protein (AHRD V3.3 *** A0A2U1QF58_ARTAN)	21.64	16.52	16.05	26.9	20.44	25.79	21.28	34.41	22.11	13.11	10.77	8.03	18.07	24.3767	25.9333	10.6367	GO:000419	MF:aspartic-type endopeptidase activity;	------	------	------	------	ENOG410XNV7	O:Posttranslational modification, protein turnover, chaperones	XP_004240544.1	aspartic proteinase Asp1 [Solanum lycopersicum]	sp|Q0IU52|ASP1_ORYSJ;	Aspartic proteinase Asp1 OS=Oryza sativa subsp. japonica OX=39947 GN=ASP1 PE=2 SV=1;	PF14543.8;PF14541.8;PF00026.25	TAXi_N;TAXi_C;Asp	Xylanase inhibitor N-terminal;Xylanase inhibitor C-terminal;Eukaryotic aspartyl protease
gene_Solyc06g009150.1	Solyc06g009150.1	DUF538 family protein (AHRD V3.3 *** B6SJU2_MAIZE)	31.63	36.97	21.26	23.78	25.66	34.66	16.08	37.2	22.08	11.65	8.02	6.43	29.9533	28.0333	25.12	8.7	------	------	------	------	------	------	ENOG410YQR5;ENOG410YQMA	S:Function unknown;	XP_004240548.1	uncharacterized protein At5g01610-like [Solanum lycopersicum]	------	------	PF04398.14	DUF538	Protein of unknown function, DUF538
gene_Solyc06g010030.4	Solyc06g010030.4	MLO-like protein (AHRD V3.3 *** K4C430_SOLLC)	25.77	17.79	18.94	13.44	5.65	12.05	11.16	19.55	11.18	4.9	5.69	4.61	20.8333	10.38	13.9633	5.06667	GO:0006952;GO:0009607;GO:0016021;GO:000551	BP:defense response;BP:response to biotic stimulus;CC:integral component of membrane;MF:calmodulin binding;	K08472	MLO	------	------	ENOG410ZUVB	D:Cell cycle control, cell division, chromosome partitioning	XP_004240581.1	MLO-like protein 6 [Solanum lycopersicum]	sp|Q94KB7|MLO6_ARATH;	MLO-like protein 6 OS=Arabidopsis thaliana OX=3702 GN=MLO6 PE=2 SV=2;	PF03094.17	Mlo	Mlo family
gene_Solyc06g019170.3	Solyc06g019170.3	Delta-1-pyrroline-5-carboxylate synthase (AHRD V3.3 *** A0A0U1XEG4_LYCCN)	3.85	2.87	5.68	4.71	4.11	3.95	4.27	3.36	3.97	9.8	25.55	9.23	4.13333	4.25667	3.86667	14.86	GO:0055114;GO:0055129;GO:0005737;GO:0004349;GO:0004350;GO:0005524;GO:001649	BP:oxidation-reduction process;BP:L-proline biosynthetic process;CC:cytoplasm;MF:glutamate 5-kinase activity;MF:glutamate-5-semialdehyde dehydrogenase activity;MF:ATP binding;MF:oxidoreductase activity;	K12657	ALDH18A1, P5CS	map00330	Arginine and proline metabolism	COG0263	E:Amino acid transport and metabolism	XP_004240687.1	delta-1-pyrroline-5-carboxylate synthase-like isoform X2 [Solanum lycopersicum]	sp|Q96480|P5CS_SOLLC;	Delta-1-pyrroline-5-carboxylate synthase OS=Solanum lycopersicum OX=4081 GN=PRO2 PE=2 SV=1;	PF00696.30;PF00171.24	AA_kinase;Aldedh	Amino acid kinase family;Aldehyde dehydrogenase family
gene_Solyc06g034390.1	Solyc06g034390.1	Protein EXORDIUM-like 7 (AHRD V3.3 *** A0A2G2X692_CAPBA)	4.99	5.39	7.62	4.4	11.02	5.61	10.16	3.69	11.73	10.96	34.23	22.47	6	7.01	8.52667	22.5533	GO:0016021;GO:000561	CC:integral component of membrane;CC:extracellular space;	------	------	------	------	ENOG410Y43B	S:Function unknown	XP_004240753.1	protein EXORDIUM-like 3 [Solanum lycopersicum]	sp|Q9FHM9|EXOL3_ARATH;	Protein EXORDIUM-like 3 OS=Arabidopsis thaliana OX=3702 GN=EXL3 PE=2 SV=1;	PF04674.14	Phi_1	Phosphate-induced protein 1 conserved region
gene_Solyc06g035520.3	Solyc06g035520.3	Alpha/beta-hydrolases superfamily protein (AHRD V3.3 *** A0A2U1LX98_ARTAN)	5.51	4.24	7.17	8.04	2.05	7.65	4.82	9.33	4.24	2.43	1.76	0.8	5.64	5.91333	6.13	1.66333	GO:001678	MF:hydrolase activity;	------	------	------	------	COG0657	I:Lipid transport and metabolism	XP_004240748.1	probable carboxylesterase 120 [Solanum lycopersicum]	sp|Q9LVB8|CXE20_ARATH;	Probable carboxylesterase 120 OS=Arabidopsis thaliana OX=3702 GN=CXE20 PE=2 SV=1;	PF07859.15;PF00135.30;PF10340.11	Abhydrolase_3;COesterase;Say1_Mug180	alpha/beta hydrolase fold;Carboxylesterase family;Steryl acetyl hydrolase
gene_Solyc06g043150.4	Solyc06g043150.4	WD40 repeat (AHRD V3.3 *** A0A200R530_9MAGN)	3.07	5.12	7.08	1.69	4.76	2.23	3.45	1.46	3.68	3.76	8.94	9.46	5.09	2.89333	2.86333	7.38667	GO:0031145;GO:0016567;GO:1905786;GO:1904668;GO:0005680;GO:0097027;GO:0005515;GO:0010997;GO:199075	BP:anaphase-promoting complex-dependent catabolic process;BP:protein ubiquitination;BP:positive regulation of anaphase-promoting complex-dependent catabolic process;BP:positive regulation of ubiquitin protein ligase activity;CC:anaphase-promoting complex;MF:ubiquitin-protein transferase activator activity;MF:protein binding;MF:anaphase-promoting complex binding;MF:ubiquitin ligase activator activ…	K03364	CDH1, FZR1	map04120	Ubiquitin mediated proteolysis	COG2319	S:Function unknown	NP_001307322.1	cell cycle switch 52B [Solanum lycopersicum]	sp|Q8LPL5|FZR3_ARATH;	Protein FIZZY-RELATED 3 OS=Arabidopsis thaliana OX=3702 GN=FZR3 PE=1 SV=1;	PF12894.9	ANAPC4_WD40	Anaphase-promoting complex subunit 4 WD40 domain
gene_Solyc06g048740.4	Solyc06g048740.4	LRR receptor-like serine/threonine-protein kinase FLS2 isoform X2 (AHRD V3.11 *** tr|A0A1U8FS01|A0A1U8FS01_CAPAN)	1.56	1.41	1.82	2.75	1.02	3.15	1.81	2.67	0.71	0.44	0.32	0.21	1.59667	2.30667	1.73	0.323333	GO:0046777;GO:0016021;GO:0005886;GO:0004674;GO:0004672;GO:000552	BP:protein autophosphorylation;CC:integral component of membrane;CC:plasma membrane;MF:protein serine/threonine kinase activity;MF:protein kinase activity;MF:ATP binding;	------	------	------	------	COG4886;COG0515	S:Function unknown;T:Signal transduction mechanisms	XP_010322115.1	probable LRR receptor-like serine/threonine-protein kinase At3g47570 [Solanum lycopersicum]	sp|C0LGP4|Y3475_ARATH;	Probable LRR receptor-like serine/threonine-protein kinase At3g47570 OS=Arabidopsis thaliana OX=3702 GN=At3g47570 PE=2 SV=1;	PF13855.8;PF12799.9;PF00069.27;PF07714.19;PF08263.14	LRR_8;LRR_4;Pkinase;PK_Tyr_Ser-Thr;LRRNT_2	Leucine rich repeat;Leucine Rich repeats;Protein kinase domain;Protein tyrosine and serine/threonine kinase;Leucine rich repeat N-terminal domain
gene_Solyc06g054270.3	Solyc06g054270.3	Sugar transporter protein 11	4.55	6.17	5.22	13.96	5.44	13.8	10.94	11.24	7.19	3.88	3.06	3.19	5.31333	11.0667	9.79	3.37667	GO:0006817;GO:0055085;GO:0008643;GO:0016021;GO:002285	BP:phosphate ion transport;BP:transmembrane transport;BP:carbohydrate transport;CC:integral component of membrane;MF:transmembrane transporter activity;	K24193	STP	------	------	ENOG410XNQK	G:Carbohydrate transport and metabolism	NP_001289843.2	sugar transport protein 8-like [Solanum lycopersicum]	sp|Q9SBA7|STP8_ARATH;	Sugar transport protein 8 OS=Arabidopsis thaliana OX=3702 GN=STP8 PE=2 SV=2;	PF00083.26;PF07690.18	Sugar_tr;MFS_1	Sugar;Major Facilitator Superfamily
gene_Solyc06g061200.1	Solyc06g061200.1	glycine-rich protein 1	15.36	11.54	21.53	16.04	23.01	6.54	10.01	0.54	5.09	49.14	239.21	84.34	16.1433	15.1967	5.21333	124.23	------	------	------	------	------	------	------	------	AAP83840.1	glycine-rich protein TomR2 [Solanum lycopersicum]	------	------	------	------	------
gene_Solyc06g063210.3	Solyc06g063210.3	glutamate receptor-like 2.5	5.75	3.79	4.35	9.72	5.18	7.73	6.28	11.11	4.33	2.68	3.07	2.06	4.63	7.54333	7.24	2.60333	GO:0016021;GO:0016020;GO:0005886;GO:0038023;GO:0015276;GO:000497	CC:integral component of membrane;CC:membrane;CC:plasma membrane;MF:signaling receptor activity;MF:ligand-gated ion channel activity;MF:ionotropic glutamate receptor activity;	K05387	GRIP	------	------	ENOG410XQQV;ENOG41120B7	S:Function unknown;P:Inorganic ion transport and metabolism	XP_010322804.1	glutamate receptor 2.8 [Solanum lycopersicum]	sp|Q9C5V5|GLR28_ARATH;	Glutamate receptor 2.8 OS=Arabidopsis thaliana OX=3702 GN=GLR2.8 PE=2 SV=2;	PF01094.30;PF00060.28;PF13458.8;PF00497.22	ANF_receptor;Lig_chan;Peripla_BP_6;SBP_bac_3	Receptor family ligand binding region;Ligand-gated ion channel;Periplasmic binding protein;Bacterial extracellular solute-binding proteins, family 3
gene_Solyc06g065680.3	Solyc06g065680.3	cyclin A2	6.27	6.75	10.78	9.6	19.61	11.21	12.94	4.22	12.23	20.24	23.43	36.2	7.93333	13.4733	9.79667	26.6233	GO:0000079;GO:0044772;GO:0051301;GO:0007049;GO:0005737;GO:0000307;GO:0005634;GO:001653	BP:regulation of cyclin-dependent protein serine/threonine kinase activity;BP:mitotic cell cycle phase transition;BP:cell division;BP:cell cycle;CC:cytoplasm;CC:cyclin-dependent protein kinase holoenzyme complex;CC:nucleus;MF:cyclin-dependent protein serine/threonine kinase regulator activity;	K06627	CCNA	------	------	COG5024	D:Cell cycle control, cell division, chromosome partitioning	XP_015080256.1	cyclin-A2-2-like [Solanum pennellii]	sp|Q2QQ96|CCA21_ORYSJ;	Cyclin-A2-1 OS=Oryza sativa subsp. japonica OX=39947 GN=CYCA2-1 PE=2 SV=1;	PF00134.25;PF02984.21	Cyclin_N;Cyclin_C	Cyclin, N-terminal domain;Cyclin, C-terminal domain
gene_Solyc06g068130.3	Solyc06g068130.3	Tetratricopeptide repeat (TPR)-like superfamily protein (AHRD V3.3 *-* F4K464_ARATH)	225.71	189.03	186.61	1.25	1.21	1.27	1.94	4.61	3.27	0	0.07	0	200.45	1.24333	3.27333	0.023333	------	------	------	------	------	------	ENOG41117EX	S:Function unknown	XP_004241695.1	myb-like protein O [Solanum lycopersicum]	------	------	PF13431.8;PF14559.8	TPR_17;TPR_19	Tetratricopeptide repeat;Tetratricopeptide repeat
gene_Solyc06g068550.5	Solyc06g068550.5	Eukaryotic aspartyl protease family protein (AHRD V3.11 *** tr|A0A2U1P524|A0A2U1P524_ARTAN)	1.47	1.71	1.89	1.56	1.58	0.76	1.56	0.82	1.54	2.35	7.21	3.22	1.69	1.3	1.30667	4.26	GO:000419	MF:aspartic-type endopeptidase activity;	------	------	------	------	ENOG410XNV7	O:Posttranslational modification, protein turnover, chaperones	XP_004241673.1	aspartyl protease family protein At5g10770-like [Solanum lycopersicum]	sp|Q8S9J6|ASPA_ARATH;	Aspartyl protease family protein At5g10770 OS=Arabidopsis thaliana OX=3702 GN=At5g10770 PE=2 SV=1;	PF14543.8;PF00026.25;PF14541.8	TAXi_N;Asp;TAXi_C	Xylanase inhibitor N-terminal;Eukaryotic aspartyl protease;Xylanase inhibitor C-terminal
gene_Solyc06g068880.3	Solyc06g068880.3	Carboxypeptidase (AHRD V3.3 *** A0A2G2ZBY4_CAPAN)	2.69	4.03	6.89	1.91	4.13	2.05	5.22	2.31	7.19	6.34	14.43	13.19	4.53667	2.69667	4.90667	11.32	GO:0006508;GO:0005773;GO:0016021;GO:0005576;GO:000418	BP:proteolysis;CC:vacuole;CC:integral component of membrane;CC:extracellular region;MF:serine-type carboxypeptidase activity;	K16297	SCPL-II	------	------	COG2939	E:Amino acid transport and metabolism	KAG5602168.1	hypothetical protein H5410_033538 [Solanum commersonii]	sp|Q93Y09|SCP45_ARATH;	Serine carboxypeptidase-like 45 OS=Arabidopsis thaliana OX=3702 GN=SCPL45 PE=2 SV=1;	PF00450.24	Peptidase_S10	Serine carboxypeptidase
gene_Solyc06g069820.5	Solyc06g069820.5	DUF674 family protein (AHRD V3.11 *** tr|A0A2K3NL09|A0A2K3NL09_TRIPR)	5.66	4.3	6.79	5.88	6.92	4.89	5.25	3.74	6.35	7.1	18.27	11.55	5.58333	5.89667	5.11333	12.3067	GO:001602	CC:integral component of membrane;	------	------	------	------	ENOG41129UG	S:Function unknown	XP_004241581.1	uncharacterized protein LOC101254212 [Solanum lycopersicum]	------	------	PF05056.14	DUF674	Protein of unknown function
gene_Solyc06g075650.3	Solyc06g075650.3	tonoplast intrinsic protein 1.2	37.15	46.62	31.53	35.11	10.07	22.79	19.39	26.96	14.34	5.25	5.45	3.14	38.4333	22.6567	20.23	4.61333	GO:0055085;GO:0016020;GO:0016021;GO:0015250;GO:001526	BP:transmembrane transport;CC:membrane;CC:integral component of membrane;MF:water channel activity;MF:channel activity;	K09873	TIP	------	------	COG0580	G:Carbohydrate transport and metabolism	NP_001274695.1	aquaporin TIP1-3-like [Solanum lycopersicum]	sp|O82598|TIP13_ARATH;	Aquaporin TIP1-3 OS=Arabidopsis thaliana OX=3702 GN=TIP1-3 PE=1 SV=1;	PF00230.22	MIP	Major intrinsic protein
gene_Solyc06g076130.3	Solyc06g076130.3	GTP-binding Obg/CgtA protein (AHRD V3.3 *-* A0A2K3MSE1_TRIPR)	9.51	8.5	7.95	16.01	6.5	12.6	13.11	19.47	10.63	5.88	4.94	2.99	8.65333	11.7033	14.4033	4.60333	------	------	------	------	------	------	ENOG410YHUX	S:Function unknown	XP_004241228.1	protein TRM32 [Solanum lycopersicum]	sp|F4HSD5|TRM32_ARATH;	Protein TRM32 OS=Arabidopsis thaliana OX=3702 GN=TRM32 PE=2 SV=1;	PF14309.8	DUF4378	Domain of unknown function
gene_Solyc06g076870.5	Solyc06g076870.5	60S acidic ribosomal protein P0 (AHRD V3.11 *** tr|A0A2G2WNS6|A0A2G2WNS6_CAPBA)	0	0	0.03	0	0.05	0	0	0	0.06	0.22	1.45	0.31	0.01	0.016667	0.02	0.66	GO:0042254;GO:0002181;GO:0000027;GO:0005840;GO:0022625;GO:0070180;GO:000373	BP:ribosome biogenesis;BP:cytoplasmic translation;BP:ribosomal large subunit assembly;CC:ribosome;CC:cytosolic large ribosomal subunit;MF:large ribosomal subunit rRNA binding;MF:structural constituent of ribosome;	K02941	RP-LP0, RPLP0	map03010	Ribosome	COG0244	J:Translation, ribosomal structure and biogenesis	XP_004241171.1	60S acidic ribosomal protein P0-like [Solanum lycopersicum]	sp|P50346|RLA0_SOYBN;	60S acidic ribosomal protein P0 OS=Glycine max OX=3847 PE=2 SV=1;	PF00428.21;PF00466.22;PF17777.3	Ribosomal_60s;Ribosomal_L10;RL10P_insert	60s Acidic ribosomal protein;Ribosomal protein L10;Insertion domain in 60S ribosomal protein L10P
gene_Solyc06g083910.3	Solyc06g083910.3	2-oxoglutarate (2OG) and Fe(II)-dependent oxygenase superfamily protein (AHRD V3.3 *** A0A2U1QGX7_ARTAN)	0	0	0.08	0.07	0	0	0.05	0.2	0	0.67	0.6	1.16	0.026667	0.023333	0.083333	0.81	GO:0055114;GO:0031418;GO:0046872;GO:0051213;GO:001649	BP:oxidation-reduction process;MF:L-ascorbic acid binding;MF:metal ion binding;MF:dioxygenase activity;MF:oxidoreductase activity;	------	------	------	------	COG3491	S:Function unknown	XP_004242358.1	hyoscyamine 6-dioxygenase [Solanum lycopersicum]	sp|P24397|HY6H_HYONI;	Hyoscyamine 6-dioxygenase OS=Hyoscyamus niger OX=4079 GN=H6H PE=1 SV=1;	PF03171.22;PF14226.8	2OG-FeII_Oxy;DIOX_N	2OG-F;non-haem dioxygenase in morphine synthesis N-terminal
gene_Solyc07g006420.1	Solyc07g006420.1	transmembrane protein (AHRD V3.3 *** AT2G18680.1)	0.3	0.82	0.77	4.79	1.63	2.58	2.27	3.26	1.89	0.69	0.38	0.61	0.63	3	2.47333	0.56	GO:001602	CC:integral component of membrane;	------	------	------	------	ENOG410Z9KI	S:Function unknown	XP_025887640.1	uncharacterized protein LOC112941801 [Solanum lycopersicum]	------	------	------	------	------
gene_Solyc07g006560.3	Solyc07g006560.3	Hypersensitive response assisting protein (AHRD V3.3 *** Q9SWC6_CAPAN)	93.64	84.42	77.75	205.92	389.28	212.34	231.25	228.58	418.04	752.78	431.23	453.16	85.27	269.18	292.623	545.723	GO:0006401;GO:0005576;GO:0033897;GO:0004521;GO:000372	BP:RNA catabolic process;CC:extracellular region;MF:ribonuclease T2 activity;MF:endoribonuclease activity;MF:RNA binding;	K01166	RNASET2	------	------	ENOG4111M7G	S:Function unknown	XP_015080705.1	ribonuclease MC-like [Solanum pennellii]	------	------	PF00445.20	Ribonuclease_T2	Ribonuclease T2 family
gene_Solyc07g007240.3	Solyc07g007240.3	Metallocarboxypeptidase inhibitor (AHRD V3.3 *** A0A2G3BXM1_CAPCH)	25.46	16.78	16.82	5.72	19.65	11.68	10.79	3.54	13.54	41.28	19.78	56.08	19.6867	12.35	9.29	39.0467	GO:0016021;GO:0004180;GO:000486	CC:integral component of membrane;MF:carboxypeptidase activity;MF:endopeptidase inhibitor activity;	------	------	------	------	------	------	XP_015081685.1	metallocarboxypeptidase inhibitor-like [Solanum pennellii]	sp|P01076|MCPI_SOLLC;	Metallocarboxypeptidase inhibitor OS=Solanum lycopersicum OX=4081 PE=1 SV=2;	PF02977.17	CarbpepA_inh	Carboxypeptidase A inhibitor
gene_Solyc07g008140.3	Solyc07g008140.3	Umecyanin (AHRD V3.3 *-* A0A2G2WBI2_CAPBA)	5.95	5.53	3.56	14.09	6.42	11.71	6.78	9.64	3.86	2.94	1.94	0.99	5.01333	10.74	6.76	1.95667	GO:0046658;GO:000905	CC:anchored component of plasma membrane;MF:electron carrier activity;	------	------	------	------	ENOG410Z0W4;ENOG410YP7M	S:Function unknown;	XP_010323300.1	cucumber peeling cupredoxin [Solanum lycopersicum]	sp|P42849|UMEC_ARMRU;	Umecyanin OS=Armoracia rusticana OX=3704 PE=1 SV=1;	PF02298.19	Cu_bind_like	Plastocyanin-like domain
gene_Solyc07g008440.3	Solyc07g008440.3	Purine permease (AHRD V3.3 *** A0A2R6QYE6_ACTCH),Pfam:PF16913	13.27	9.41	8.99	15.89	7.93	13.79	12.12	18.37	12.15	5.6	7.18	3.26	10.5567	12.5367	14.2133	5.34667	GO:0016021;GO:001521	CC:integral component of membrane;MF:purine nucleoside transmembrane transporter activity;	------	------	------	------	ENOG410Y9BB	U:Intracellular trafficking, secretion, and vesicular transport	XP_004242795.1	purine permease 3-like [Solanum lycopersicum]	sp|Q9FZ95|PUP3_ARATH;	Purine permease 3 OS=Arabidopsis thaliana OX=3702 GN=PUP3 PE=2 SV=1;	PF16913.7;PF08449.13;PF04142.17;PF00892.22	PUNUT;UAA;Nuc_sug_transp;EamA	Purine nucleobase transmembrane transport;UAA transporter family;Nucleotide-sugar transporter;EamA-like transporter family
gene_Solyc07g008620.1	Solyc07g008620.1	EIX receptor 1	3.3	2.39	1.91	6.21	3.93	4.29	4.36	6.5	2.42	1.85	1.98	0.97	2.53333	4.81	4.42667	1.6	GO:0050832;GO:0016021;GO:0005886;GO:0016301;GO:000551	BP:defense response to fungus;CC:integral component of membrane;CC:plasma membrane;MF:kinase activity;MF:protein binding;	K13466	EIX1_2	map04626	Plant-pathogen interaction	COG4886	S:Function unknown	Q6JN47.2;;	;Flags: Precursor [Solanum lycopersicum]	sp|Q6JN47|EIX1_SOLLC;	Receptor-like protein EIX1 OS=Solanum lycopersicum OX=4081 GN=EIX1 PE=2 SV=2;	PF13855.8;PF12799.9;PF08263.14	LRR_8;LRR_4;LRRNT_2	Leucine rich repeat;Leucine Rich repeats;Leucine rich repeat N-terminal domain
gene_Solyc07g009443.1	Solyc07g009443.1	G-type lectin S-receptor-like serine/threonine-protein kinase (AHRD V3.3 *** A0A2G2Z069_CAPAN)	1.82	1.12	0.36	1.87	1.38	1.86	1.62	2.91	1.21	0.49	1.02	0.59	1.1	1.70333	1.91333	0.7	GO:0006468;GO:0048544;GO:0016021;GO:0005886;GO:0106310;GO:0106311;GO:0004672;GO:0030246;GO:0004674;GO:000552	BP:protein phosphorylation;BP:recognition of pollen;CC:integral component of membrane;CC:plasma membrane;CC:old GO;CC:old GO;MF:protein kinase activity;MF:carbohydrate binding;MF:protein serine/threonine kinase activity;MF:ATP binding;	------	------	------	------	COG0515	T:Signal transduction mechanisms	XP_015082545.1	G-type lectin S-receptor-like serine/threonine-protein kinase At4g03230 [Solanum pennellii]	sp|Q9ZR08|Y4230_ARATH;	G-type lectin S-receptor-like serine/threonine-protein kinase At4g03230 OS=Arabidopsis thaliana OX=3702 GN=At4g03230 PE=3 SV=3;	PF07714.19;PF00069.27;PF01453.26;PF00954.22;PF08276.13;PF11883.10	PK_Tyr_Ser-Thr;Pkinase;B_lectin;S_locus_glycop;PAN_2;DUF3403	Protein tyrosine and serine/threonine kinase;Protein kinase domain;D-mannose binding lectin;S-locus glycoprotein domain;PAN-like domain;Domain of unknown function
gene_Solyc07g009450.1	Solyc07g009450.1	Unknown protein	9.96	8.47	15.32	6.92	3.01	4.06	3.7	4.7	3.9	1.3	2	1.47	11.25	4.66333	4.1	1.59	------	------	------	------	------	------	------	------	------	------	------	------	------	------	------
gene_Solyc07g032490.3	Solyc07g032490.3	Major facilitator superfamily protein (AHRD V3.3 *** A0A1P8AZ04_ARATH)	25.86	26.27	31.91	70.9	25.34	58.03	34.4	46.26	29.74	19.31	14.32	10.51	28.0133	51.4233	36.8	14.7133	GO:0006857;GO:0009753;GO:0006817;GO:0009611;GO:0055085;GO:0016021;GO:0016020;GO:002285	BP:oligopeptide transport;BP:response to jasmonic acid;BP:phosphate ion transport;BP:response to wounding;BP:transmembrane transport;CC:integral component of membrane;CC:membrane;MF:transmembrane transporter activity;	------	------	------	------	COG3104	E:Amino acid transport and metabolism	XP_010323568.1	protein NRT1/ PTR FAMILY 6.2 [Solanum lycopersicum]	sp|Q9SZY4|PTR27_ARATH;	Protein NRT1/ PTR FAMILY 6.2 OS=Arabidopsis thaliana OX=3702 GN=NPF6.2 PE=1 SV=1;	PF00854.23	PTR2	POT family
gene_Solyc07g041920.5	Solyc07g041920.5	Cysteine protease (AHRD V3.11 *** tr|Q9LRI2|Q9LRI2_TOBAC)	41	47.59	40.2	358.93	551.01	433.97	279.47	394.18	439.89	2016.45	1027.31	1012.65	42.93	447.97	371.18	1352.14	GO:0051603;GO:0006508;GO:0005615;GO:0005764;GO:0004197;GO:000823	BP:proteolysis involved in cellular protein catabolic process;BP:proteolysis;CC:extracellular space;CC:lysosome;MF:cysteine-type endopeptidase activity;MF:cysteine-type peptidase activity;	K01366	CTSH	------	------	COG4870	O:Posttranslational modification, protein turnover, chaperones	XP_004243707.1	cysteine proteinase 3-like [Solanum lycopersicum]	sp|Q40143|CYSP3_SOLLC;	Cysteine proteinase 3 OS=Solanum lycopersicum OX=4081 GN=CYP-3 PE=2 SV=1;	PF00112.25;PF08246.14;PF03051.17	Peptidase_C1;Inhibitor_I29;Peptidase_C1_2	Papain family cysteine protease;Cathepsin propeptide inhibitor domain;Peptidase C1-like family
gene_Solyc07g042190.3	Solyc07g042190.3	DUF5.1	155.52	152.42	132.18	95.04	55.28	113.46	67.66	92.78	82.39	27.52	50.19	29.62	146.707	87.9267	80.9433	35.7767	------	------	------	------	------	------	ENOG410Y1Y5	S:Function unknown	XP_004243694.1	protein MARD1 [Solanum lycopersicum]	sp|Q8GRN0|FLZ13_ARATH;	FCS-Like Zinc finger 13 OS=Arabidopsis thaliana OX=3702 GN=FLZ13 PE=1 SV=1;	PF04570.16	zf-FLZ	zinc-finger of the FCS-type, C2-C2
gene_Solyc07g043070.3	Solyc07g043070.3	hypothetical protein (AHRD V3.3 *-* AT4G15140.1)	2.15	2.41	6.05	1.3	1.73	1.37	1.93	1.72	2	3.19	7.46	6.22	3.53667	1.46667	1.88333	5.62333	GO:000588	CC:plasma membrane;	------	------	------	------	ENOG410Z7H6	S:Function unknown	XP_004243655.1	uncharacterized protein LOC101259763 [Solanum lycopersicum]	------	------	------	------	------
gene_Solyc07g043320.3	Solyc07g043320.3	myosin heavy chain%2C embryonic smooth protein (AHRD V3.3 *-* AT1G05320.9)	71.58	61.07	72.21	97.84	38.2	73.63	70.3	112.91	59.97	28.39	43.67	22.08	68.2867	69.89	81.06	31.38	GO:0044772;GO:0000079;GO:0005737;GO:0016021;GO:0000307;GO:0005634;GO:001653	BP:mitotic cell cycle phase transition;BP:regulation of cyclin-dependent protein serine/threonine kinase activity;CC:cytoplasm;CC:integral component of membrane;CC:cyclin-dependent protein kinase holoenzyme complex;CC:nucleus;MF:cyclin-dependent protein serine/threonine kinase regulator activity;	K20283	GOLGA4	------	------	ENOG410XXAW	S:Function unknown	XP_004243644.1	myosin heavy chain, skeletal muscle [Solanum lycopersicum]	------	------	PF19220.2;PF00261.22	Crescentin;Tropomyosin	Crescentin protein;Tropomyosin
gene_Solyc07g045160.3	Solyc07g045160.3	ATP-dependent 6-phosphofructokinase (AHRD V3.3 *** A0A2G2WC06_CAPBA)	16.63	16.11	13.18	14.51	10.97	13.8	13.14	18.3	11.42	6.62	6.42	4.09	15.3067	13.0933	14.2867	5.71	GO:0006096;GO:0006002;GO:0005737;GO:0005524;GO:0003872;GO:004687	BP:glycolytic process;BP:fructose 6-phosphate metabolic process;CC:cytoplasm;MF:ATP binding;MF:6-phosphofructokinase activity;MF:metal ion binding;	K00850	pfkA, PFK	map03018;map00010;map00030;map00051;map00052	RNA degradation;Glycolysis / Gluconeogenesis;Pentose phosphate pathway;Fructose and mannose metabolism;Galactose metabolism	COG0205	G:Carbohydrate transport and metabolism	XP_004243600.1	ATP-dependent 6-phosphofructokinase 6 isoform X1 [Solanum lycopersicum]	sp|Q9C5J7|PFKA7_ARATH;	ATP-dependent 6-phosphofructokinase 7 OS=Arabidopsis thaliana OX=3702 GN=PFK7 PE=1 SV=1;	PF00365.22	PFK	Phosphofructokinase
gene_Solyc07g054270.3	Solyc07g054270.3	DUF789 domain-containing protein (AHRD V3.3 *** A0A1Q3CP56_CEPFO)	8.26	8.93	16.14	14.89	20.24	14.8	13.23	9.38	20.66	43.96	60.07	68.84	11.11	16.6433	14.4233	57.6233	------	------	------	------	------	------	ENOG410YCMM	S:Function unknown	XP_004243335.1	uncharacterized protein LOC101263727 [Solanum lycopersicum]	------	------	PF05623.14	DUF789	Protein of unknown function
gene_Solyc07g054690.1	Solyc07g054690.1	hypothetical protein (AHRD V3.3 *** AT4G28230.1)	1.94	2.08	5.11	1.34	2.25	0.82	2.52	1.35	2.03	2.24	6.79	5.08	3.04333	1.47	1.96667	4.70333	------	------	------	------	------	------	ENOG410YPUT	S:Function unknown	XP_004243795.1	uncharacterized protein LOC101259172 [Solanum lycopersicum]	------	------	------	------	------
gene_Solyc07g055180.3	Solyc07g055180.3	Protein kinase superfamily protein (AHRD V3.3 *** F4J5Y7_ARATH)	0.76	0.59	2.03	0.94	2.28	0.38	1.51	0.28	2.66	2.65	20.39	7.92	1.12667	1.2	1.48333	10.32	GO:0006468;GO:0016021;GO:0004674;GO:0004672;GO:0008375;GO:000552	BP:protein phosphorylation;CC:integral component of membrane;MF:protein serine/threonine kinase activity;MF:protein kinase activity;MF:acetylglucosaminyltransferase activity;MF:ATP binding;	------	------	------	------	COG0515	T:Signal transduction mechanisms	XP_004243277.1	probable serine/threonine-protein kinase PBL7 [Solanum lycopersicum]	sp|Q0WRY5|PBL7_ARATH;	Probable serine/threonine-protein kinase PBL7 OS=Arabidopsis thaliana OX=3702 GN=PBL7 PE=1 SV=1;	PF07714.19;PF00069.27	PK_Tyr_Ser-Thr;Pkinase	Protein tyrosine and serine/threonine kinase;Protein kinase domain
gene_Solyc07g056640.1	Solyc07g056640.1	Unknown protein	1.57	1.76	4.11	5.63	5.67	6.88	5.47	12.54	2.56	13.34	42.71	12.55	2.48	6.06	6.85667	22.8667	------	------	------	------	------	------	------	------	------	------	------	------	------	------	------
gene_Solyc07g056650.5	Solyc07g056650.5	Interactor of constitutive active ROPS 1-like protein (AHRD V3.11 *** tr|A0A2K3NH99|A0A2K3NH99_TRIPR)	8.14	10.51	14.39	9.11	18.27	8.72	15.47	5.86	18.03	16.99	42.37	30.72	11.0133	12.0333	13.12	30.0267	------	------	------	------	------	------	ENOG410YKFD	S:Function unknown	XP_004243183.1	interactor of constitutive active ROPs 4 [Solanum lycopersicum]	sp|Q9M9F9|ICR4_ARATH;	Interactor of constitutive active ROPs 4 OS=Arabidopsis thaliana OX=3702 GN=ICR4 PE=1 SV=2;	PF19220.2;PF12718.9;PF13870.8	Crescentin;Tropomyosin_1;DUF4201	Crescentin protein;Tropomyosin like;Domain of unknown function
gene_Solyc07g061935.1	Solyc07g061935.1	C2 domain-containing protein (AHRD V3.3 *-* A0A2G2Z4M9_CAPAN)	3.05	2.14	3.31	1.59	1.95	0.99	1.67	0.91	1.34	4.38	6.77	6.48	2.83333	1.51	1.30667	5.87667	GO:0006869;GO:0016021;GO:000828	BP:lipid transport;CC:integral component of membrane;MF:lipid binding;	------	------	------	------	COG5038	S:Function unknown	XP_025888020.1	uncharacterized protein LOC101253806 [Solanum lycopersicum]	------	------	------	------	------
gene_Solyc07g062220.3	Solyc07g062220.3	Protein trichome birefringence-like .1	10.54	11.55	7.22	11.25	6.96	16.37	4.06	6.2	3.54	2.36	1.47	1.68	9.77	11.5267	4.6	1.83667	GO:0005794;GO:001641	CC:Golgi apparatus;MF:O-acetyltransferase activity;	------	------	------	------	ENOG41118PY	S:Function unknown	XP_004244289.1	protein trichome birefringence-like 41 [Solanum lycopersicum]	sp|F4IWA8|TBL41_ARATH;	Protein trichome birefringence-like 41 OS=Arabidopsis thaliana OX=3702 GN=TBL41 PE=2 SV=1;	PF13839.8;PF14416.8	PC-Esterase;PMR5N	GDSL/SGNH-like Acyl-Esterase family found in Pmr5 and Cas1p;PMR5 N terminal Domain
gene_Solyc07g066040.1	Solyc07g066040.1	RNA polymerase II elongation factor (AHRD V3.3 *** AT5G56120.1)	10.66	13.41	30.6	7.23	18.62	9.5	15.24	5.68	16.76	17.46	40.7	44.52	18.2233	11.7833	12.56	34.2267	GO:001602	CC:integral component of membrane;	------	------	------	------	ENOG410Y09R	S:Function unknown	XP_004244010.1	uncharacterized protein LOC101266240 [Solanum lycopersicum]	------	------	------	------	------
gene_Solyc08g007460.3	Solyc08g007460.3	Bifunctional inhibitor/lipid-transfer protein/seed storage 2S albumin superfamily protein (AHRD V3.3 *** A0A2U1L4X0_ARTAN)	16.29	12.78	9.05	33.76	12.8	23.31	20.81	33.18	9.68	8.26	8.44	3.11	12.7067	23.29	21.2233	6.60333	GO:0016021;GO:0005886;GO:003122	CC:integral component of membrane;CC:plasma membrane;CC:anchored component of membrane;	------	------	------	------	ENOG410YZ3J	S:Function unknown	XP_004244575.1	protein YLS3 [Solanum lycopersicum]	sp|Q6NLF7|LTPG7_ARATH;	Non-specific lipid transfer protein GPI-anchored 7 OS=Arabidopsis thaliana OX=3702 GN=LTPG7 PE=2 SV=1;	PF14368.8;PF00234.24	LTP_2;Tryp_alpha_amyl	Probable lipid transfer;Protease inhibitor/seed storage/LTP family
gene_Solyc08g008020.1	Solyc08g008020.1	C2 calcium/lipid-binding plant phosphoribosyltransferase family protein (AHRD V3.3 *** A0A061G6B5_THECC)	0.8	1.18	0.61	0.3	0.19	0.71	0.43	0.35	0.49	1.18	1.56	0.78	0.863333	0.4	0.423333	1.17333	GO:001602	CC:integral component of membrane;	------	------	------	------	ENOG410XRQN	S:Function unknown	XP_004244612.1	FT-interacting protein 1 [Solanum lycopersicum]	sp|Q9M2R0|FTIP3_ARATH;	FT-interacting protein 3 OS=Arabidopsis thaliana OX=3702 GN=FTIP3 PE=1 SV=1;	PF00168.32;PF08372.12;PF06398.13	C2;PRT_C;Pex24p	C2 domain;Plant phosphoribosyltransferase C-terminal;Integral peroxisomal membrane peroxin
gene_Solyc08g016210.3	Solyc08g016210.3	LOW QUALITY PROTEIN: LRR receptor-like serine/threonine-protein kinase GS.1	7.95	4.65	4.74	12.58	4.46	10.33	7.12	9.48	4.07	2.47	3.35	1.69	5.78	9.12333	6.89	2.50333	GO:0016021;GO:0005886;GO:0016301;GO:000551	CC:integral component of membrane;CC:plasma membrane;MF:kinase activity;MF:protein binding;	------	------	------	------	COG4886	S:Function unknown	XP_019070980.1	receptor-like protein 13 isoform X1 [Solanum lycopersicum]	sp|Q9LNV9|RLP1_ARATH;	Receptor-like protein 1 OS=Arabidopsis thaliana OX=3702 GN=RLP1 PE=2 SV=2;	PF13855.8;PF12799.9	LRR_8;LRR_4	Leucine rich repeat;Leucine Rich repeats
gene_Solyc08g065440.5	Solyc08g065440.5	SNF2 domain protein Chr5:3793928-3795983 FORWARD LENGTH=504 201606 (AHRD V3.11 *** AT5G11780.1)	4.52	4.88	7.51	4.15	7.06	4.21	5.12	3.38	6.43	6.04	16	10.32	5.63667	5.14	4.97667	10.7867	------	------	------	------	------	------	ENOG410YDBF	S:Function unknown	XP_010325042.1	uncharacterized protein LOC101261644 [Solanum lycopersicum]	------	------	------	------	------
gene_Solyc08g065610.3	Solyc08g065610.3	Vacuolar-processing enzyme (AHRD V3.3 *** A0A2G2VI36_CAPBA)	260.69	289.3	189.01	326.83	159.08	279.98	302.36	372.69	335.61	92.73	112.71	51.05	246.333	255.297	336.887	85.4967	GO:0051603;GO:0006624;GO:0006508;GO:0005773;GO:0004197;GO:000823	BP:proteolysis involved in cellular protein catabolic process;BP:vacuolar protein processing;BP:proteolysis;CC:vacuole;MF:cysteine-type endopeptidase activity;MF:peptidase activity;	K01369	LGMN	------	------	COG5206	O:Posttranslational modification, protein turnover, chaperones	NP_001340698.1	vacuolar processing enzyme VPE3 precursor [Solanum lycopersicum]	sp|P49043|VPE_CITSI;	Vacuolar-processing enzyme OS=Citrus sinensis OX=2711 PE=2 SV=1;	PF01650.20	Peptidase_C13	Peptidase C13 family
gene_Solyc08g066320.4	Solyc08g066320.4	receptor-like protein kinase HS.1	1.89	2.36	1.68	6.33	6.9	6.54	3.69	5.94	2.92	1.52	1.72	1.42	1.97667	6.59	4.18333	1.55333	GO:0006468;GO:0016021;GO:0005886;GO:0005524;GO:000467	BP:protein phosphorylation;CC:integral component of membrane;CC:plasma membrane;MF:ATP binding;MF:protein kinase activity;	------	------	------	------	COG4886;COG0515	S:Function unknown;T:Signal transduction mechanisms	XP_010325071.1	LRR receptor-like serine/threonine-protein kinase HSL2 isoform X1 [Solanum lycopersicum]	sp|C0LGX3|HSL2_ARATH;	LRR receptor-like serine/threonine-protein kinase HSL2 OS=Arabidopsis thaliana OX=3702 GN=HSL2 PE=1 SV=1;	PF00069.27;PF07714.19;PF13855.8;PF12799.9;PF08263.14	Pkinase;PK_Tyr_Ser-Thr;LRR_8;LRR_4;LRRNT_2	Protein kinase domain;Protein tyrosine and serine/threonine kinase;Leucine rich repeat;Leucine Rich repeats;Leucine rich repeat N-terminal domain
gene_Solyc08g066350.2	Solyc08g066350.2	Histidine-containing phosphotransfer protein 4 (AHRD V3.3 *** A0A2G2YI23_CAPAN)	31.08	32.42	36.09	16.86	10.93	23.54	11.16	30.11	13.13	8.01	6.11	1.38	33.1967	17.11	18.1333	5.16667	GO:0009736;GO:0000160;GO:0016310;GO:0005737;GO:0005829;GO:0005634;GO:0009927;GO:004342	BP:cytokinin-activated signaling pathway;BP:phosphorelay signal transduction system;BP:phosphorylation;CC:cytoplasm;CC:cytosol;CC:nucleus;MF:histidine phosphotransfer kinase activity;MF:protein histidine kinase binding;	K14490	AHP	map04075	Plant hormone signal transduction	COG2198	T:Signal transduction mechanisms	XP_010325073.1	histidine-containing phosphotransfer protein 4-like [Solanum lycopersicum]	sp|Q0DK78|PHP2_ORYSJ;	Pseudo histidine-containing phosphotransfer protein 2 OS=Oryza sativa subsp. japonica OX=39947 GN=PHP2 PE=2 SV=3;	PF01627.25	Hpt	Hpt domain
gene_Solyc08g067610.3	Solyc08g067610.3	Pleiotropic drug resistance protein (AHRD V3.3 *** C8CA13_CUCSA)	4.08	3.08	2.22	5.69	1.72	3.96	3.78	4.93	2.81	1.23	1.98	0.78	3.12667	3.79	3.84	1.33	GO:0016020;GO:0016021;GO:0042626;GO:000552	CC:membrane;CC:integral component of membrane;MF:ATPase activity, coupled to transmembrane movement of substances;MF:ATP binding;	K08711	PDR, CDR1	map02010	ABC transporters	COG1131;COG0842	V:Defense mechanisms;	XP_004245224.1	pleiotropic drug resistance protein 1-like [Solanum lycopersicum]	sp|H6WS93|PDR1_PETAX;	Pleiotropic drug resistance protein 1 OS=Petunia axillaris OX=33119 GN=PDR1 PE=2 SV=1;	PF01061.26;PF00005.29;PF08370.13;PF19055.2;PF14510.8	ABC2_membrane;ABC_tran;PDR_assoc;ABC2_membrane_7;ABC_trans_N	ABC-2 type transporter;ABC transporter;Plant PDR ABC transporter associated;ABC-2 type transporter;ABC-transporter N-terminal
gene_Solyc08g068710.1	Solyc08g068710.1	Tyramine n-hydroxycinnamoyl transferase (AHRD V3.3 *** Q5D8C0_CAPAN)	3.92	4.23	5.02	13.91	8.31	8.31	10.54	11.66	9.21	5.62	3.99	3.01	4.39	10.1767	10.47	4.20667	GO:0050366;GO:000808	MF:tyramine N-feruloyltransferase activity;MF:N-acetyltransferase activity;	K22246	THT	------	------	COG0454	K:Transcription	XP_004245284.1	tyramine N-feruloyltransferase 4/11-like [Solanum lycopersicum]	sp|Q9SMB8|THT11_TOBAC;	Tyramine N-feruloyltransferase 4/11 OS=Nicotiana tabacum OX=4097 GN=THT4 PE=2 SV=1;	PF00583.27	Acetyltransf_1	Acetyltransferase
gene_Solyc08g068870.3	Solyc08g068870.3	Eukaryotic aspartyl protease family protein, expressed (AHRD V3.3 *** Q2R8V2_ORYSJ)	101.96	82.45	87.64	198.05	65.93	129.34	126.28	249.26	64.59	35.59	45.48	18.66	90.6833	131.107	146.71	33.2433	GO:0016021;GO:000419	CC:integral component of membrane;MF:aspartic-type endopeptidase activity;	------	------	------	------	ENOG410XNV7	O:Posttranslational modification, protein turnover, chaperones	NP_001316135.1	aspartate protease family protein precursor [Solanum lycopersicum]	sp|Q9LEW3|AED1_ARATH;	Aspartyl protease AED1 OS=Arabidopsis thaliana OX=3702 GN=AED1 PE=2 SV=1;	PF00026.25;PF14541.8;PF14543.8	Asp;TAXi_C;TAXi_N	Eukaryotic aspartyl protease;Xylanase inhibitor C-terminal;Xylanase inhibitor N-terminal
gene_Solyc08g074520.2	Solyc08g074520.2	TATA-binding protein-associated factor BTA.1	1.36	0.96	1.99	1.71	0.11	0.13	0.66	0.47	1.05	0	0	0	1.43667	0.65	0.726667	0	GO:0005634;GO:0008094;GO:0070615;GO:0005524;GO:000367	CC:nucleus;MF:DNA-dependent ATPase activity;MF:nucleosome-dependent ATPase activity;MF:ATP binding;MF:DNA binding;	K15192	BTAF1, MOT1	------	------	ENOG410XP4Z	L:Replication, recombination and repair	XP_004246065.1	TATA-binding protein-associated factor BTAF1 isoform X1 [Solanum lycopersicum]	sp|B5BT18|BTAF1_ARATH;	TATA-binding protein-associated factor BTAF1 OS=Arabidopsis thaliana OX=3702 GN=BTAF1 PE=1 SV=1;	PF13646.8	HEAT_2	HEAT repeats
gene_Solyc08g075150.3	Solyc08g075150.3	coiled-coil protein (AHRD V3.3 *** AT5G45310.2)	0.04	0.04	0.13	0.05	0.2	0	0.08	0.05	0.19	0.63	10.46	0.92	0.07	0.083333	0.106667	4.00333	GO:001602	CC:integral component of membrane;	------	------	------	------	ENOG41128MX	S:Function unknown	XP_004246023.2	uncharacterized protein LOC101256209 [Solanum lycopersicum]	------	------	------	------	------
gene_Solyc08g077360.3	Solyc08g077360.3	Dynamin (AHRD V3.3 *** E5GB64_CUCME)	1.28	1.34	1.35	1.26	1.88	1.21	1.9	1.07	1.72	1.98	4.76	2.93	1.32333	1.45	1.56333	3.22333	GO:0000266;GO:0005737;GO:0016020;GO:0008017;GO:0003924;GO:000552	BP:mitochondrial fission;CC:cytoplasm;CC:membrane;MF:microtubule binding;MF:GTPase activity;MF:GTP binding;	------	------	------	------	COG0699	S:Function unknown	XP_004245858.1	dynamin-related protein 1E [Solanum lycopersicum]	sp|Q9FNX5|DRP1E_ARATH;	Phragmoplastin DRP1E OS=Arabidopsis thaliana OX=3702 GN=DRP1E PE=1 SV=1;	PF01031.22;PF00350.25;PF02212.20;PF01926.25	Dynamin_M;Dynamin_N;GED;MMR_HSR1	Dynamin central region;Dynamin family;Dynamin GTPase effector domain;50S ribosome-binding GTPase
gene_Solyc08g077370.4	Solyc08g077370.4	Purine permease (AHRD V3.3 *** A0A2P5BSS2_TREOI)	12.81	12.84	9.05	21.78	10.67	15.03	13.19	17.52	10.06	6.03	5.94	3.53	11.5667	15.8267	13.59	5.16667	GO:0016021;GO:001521	CC:integral component of membrane;MF:purine nucleoside transmembrane transporter activity;	------	------	------	------	ENOG410YEZY	S:Function unknown	XP_004245857.2	probable purine permease 11 [Solanum lycopersicum]	sp|Q9LPF6|PUP11_ARATH;	Probable purine permease 11 OS=Arabidopsis thaliana OX=3702 GN=PUP11 PE=1 SV=1;	PF16913.7	PUNUT	Purine nucleobase transmembrane transport
gene_Solyc08g077530.4	Solyc08g077530.4	Beta-amylase (AHRD V3.11 *** tr|Q94EU9|Q94EU9_SOLTU)	262.48	269.75	228.76	214.09	188.82	219.83	130.54	194.26	165.75	73.78	63.75	37.87	253.663	207.58	163.517	58.4667	GO:0000272;GO:0016161;GO:010222	BP:polysaccharide catabolic process;MF:beta-amylase activity;MF:amylopectin maltohydrolase activity;	K01177	E3.2.1.2	map00500	Starch and sucrose metabolism	ENOG410XRH5	S:Function unknown	XP_004245844.1	beta-amylase 3, chloroplastic [Solanum lycopersicum]	sp|O23553|BAM3_ARATH;	Beta-amylase 3, chloroplastic OS=Arabidopsis thaliana OX=3702 GN=BAM3 PE=1 SV=3;	PF01373.19	Glyco_hydro_14	Glycosyl hydrolase family 14
gene_Solyc08g077940.2	Solyc08g077940.2	Histone-lysine N-methyltransferase, H3 lysine-9 specific SUVH6 (AHRD V3.3 *** A0A2G2XLN8_CAPBA)	0.32	0.48	0.88	0.11	0.53	0.09	0.42	0.11	0.46	0.63	2.52	1.42	0.56	0.243333	0.33	1.52333	GO:0005634;GO:0018024;GO:0008270;GO:000551	CC:nucleus;MF:histone-lysine N-methyltransferase activity;MF:zinc ion binding;MF:protein binding;	------	------	------	------	COG2940	S:Function unknown	XP_004246167.2	histone-lysine N-methyltransferase, H3 lysine-9 specific SUVH8-like [Solanum lycopersicum]	sp|O82175|SUVH5_ARATH;	Histone-lysine N-methyltransferase, H3 lysine-9 specific SUVH5 OS=Arabidopsis thaliana OX=3702 GN=SUVH5 PE=1 SV=1;	PF02182.19;PF00856.30;PF05033.18	SAD_SRA;SET;Pre-SET	SAD/SRA domain;SET domain;Pre-SET motif
gene_Solyc08g078470.4	Solyc08g078470.4	FHA domain-containing protein (AHRD V3.3 *** A0A2G2V1D7_CAPBA)	1.78	2.17	3.54	1.95	3.69	1.49	3.17	1.4	2.01	3.5	7.63	5.62	2.49667	2.37667	2.19333	5.58333	GO:0005515;GO:000372	MF:protein binding;MF:mRNA binding;	------	------	------	------	ENOG410ZNU1	T:Signal transduction mechanisms	XP_004246158.1	FHA domain-containing protein At4g14490-like [Solanum lycopersicum]	sp|O23305|Y4449_ARATH;	FHA domain-containing protein At4g14490 OS=Arabidopsis thaliana OX=3702 GN=At4g14490 PE=1 SV=1;	PF00498.28;PF16697.7	FHA;Yop-YscD_cpl	FHA domain;Inner membrane component of T3SS, cytoplasmic domain
gene_Solyc08g079870.3	Solyc08g079870.3	subtilisin	97.05	56.96	52.42	278.83	75.62	189.83	124.27	232.9	54.46	36.67	37.66	20.54	68.81	181.427	137.21	31.6233	GO:0006508;GO:000425	BP:proteolysis;MF:serine-type endopeptidase activity;	------	------	------	------	COG1404	O:Posttranslational modification, protein turnover, chaperones	NP_001233982.1	subtilisin-like protease precursor [Solanum lycopersicum]	sp|A9QY38|SBT4_LOTJA;	Subtilisin-like protease 4 OS=Lotus japonicus OX=34305 GN=SBTM4 PE=2 SV=1;	PF00082.24;PF17766.3;PF02225.24;PF05922.18	Peptidase_S8;fn3_6;PA;Inhibitor_I9	Subtilase family;Fibronectin type-III domain;PA domain;Peptidase inhibitor I9
gene_Solyc08g080620.1	Solyc08g080620.1	PR-5x	83.34	55.96	26.64	9.79	16.7	10.67	26.3	30.07	20.99	4.47	3.91	1.93	55.3133	12.3867	25.7867	3.43667	GO:0006952;GO:0009607;GO:0005773;GO:000557	BP:defense response;BP:response to biotic stimulus;CC:vacuole;CC:extracellular region;	------	------	------	------	ENOG4111D9C;ENOG410YD4X	S:Function unknown;	AAM23272.1	PR-5x [Solanum lycopersicum]	sp|P50701|OS13_SOLCO;	Osmotin-like protein OSML13 OS=Solanum commersonii OX=4109 PE=2 SV=1;	PF00314.19	Thaumatin	Thaumatin family
gene_Solyc08g081710.3	Solyc08g081710.3	membrane-associated kinase regulator (AHRD V3.3 *** AT1G64080.1)	1.65	1.72	4.24	1.02	2.8	1.08	1.81	1.44	6.28	4.74	18.6	10.05	2.53667	1.63333	3.17667	11.13	GO:0016020;GO:0005886;GO:001630	CC:membrane;CC:plasma membrane;MF:kinase activity;	------	------	------	------	ENOG410YGY6	S:Function unknown	XP_015083970.1	probable membrane-associated kinase regulator 2 [Solanum pennellii]	sp|Q9SH58|MAKR2_ARATH;	Probable membrane-associated kinase regulator 2 OS=Arabidopsis thaliana OX=3702 GN=MAKR2 PE=2 SV=1;	------	------	------
gene_Solyc08g082190.3	Solyc08g082190.3	Unknown protein	2253.75	2836.92	2878.77	2969.45	1230.23	2779.85	2905.44	4367.96	3356.29	1237.47	1383.67	731.47	2656.48	2326.51	3543.23	1117.54	------	------	------	------	------	------	------	------	TMW89650.1	hypothetical protein EJD97_016847 [Solanum chilense]	------	------	------	------	------
gene_Solyc08g082485.1	Solyc08g082485.1	F-box protein (AHRD V3.3 *-* A0A2G3DAV0_CAPCH)	0.7	0.98	4.11	1.24	1.79	1.08	0.93	1.28	0.61	4.27	5.6	4.44	1.93	1.37	0.94	4.77	------	------	------	------	------	------	ENOG410ZN78;ENOG41107AP	S:Function unknown;	XP_004253366.1	putative F-box protein At3g25750 [Solanum lycopersicum]	sp|Q9FLP7|FB294_ARATH;	Putative F-box protein At5g55150 OS=Arabidopsis thaliana OX=3702 GN=At5g55150 PE=4 SV=2;	PF03478.20	DUF295	Protein of unknown function
gene_Solyc08g083210.3	Solyc08g083210.3	endo-1,4-beta-glucanase (cel5)	1.09	1.46	2.15	2.08	3.75	1.64	2.41	0.64	3.47	5.96	3.64	12.42	1.56667	2.49	2.17333	7.34	GO:0005975;GO:0030245;GO:0008810;GO:000455	BP:carbohydrate metabolic process;BP:cellulose catabolic process;MF:cellulase activity;MF:hydrolase activity, hydrolyzing O-glycosyl compounds;	------	------	------	------	ENOG410XPC9	G:Carbohydrate transport and metabolism	NP_001234090.2	endo-1,4-beta-glucanase precursor [Solanum lycopersicum]	sp|P05522|GUN1_PERAE;	Endoglucanase 1 OS=Persea americana OX=3435 GN=CEL1 PE=2 SV=1;	PF00759.21	Glyco_hydro_9	Glycosyl hydrolase family 9
gene_Solyc08g083240.3	Solyc08g083240.3	SUN-like protein 24	7.19	8.79	15.71	4.65	17.43	5.39	10.89	3.95	18.03	18.27	106.01	45.18	10.5633	9.15667	10.9567	56.4867	GO:0005516;GO:000551	MF:calmodulin binding;MF:protein binding;	------	------	------	------	ENOG410YBUU	S:Function unknown	XP_004245451.1	protein IQ-DOMAIN 1-like [Solanum lycopersicum]	sp|Q9MAM4|IQD18_ARATH;	Protein IQ-DOMAIN 18 OS=Arabidopsis thaliana OX=3702 GN=IQD18 PE=1 SV=1;	PF13178.8;PF00612.29	DUF4005;IQ	Protein of unknown function;IQ calmodulin-binding motif
gene_Solyc08g150141.1	Solyc08g150141.1	Unknown protein	36.18	13.61	22.52	6.18	12.48	6.4	12.9	11.63	6.06	1.39	0.75	1.34	24.1033	8.35333	10.1967	1.16	------	------	------	------	------	------	------	------	KAG5592225.1	hypothetical protein H5410_042739 [Solanum commersonii]	------	------	------	------	------
gene_Solyc09g007360.3	Solyc09g007360.3	Interactor of constitutive active ROPs (AHRD V3.3 *** A0A2K3PRJ7_TRIPR)	9.9	11.57	16.88	7.79	11.65	7.43	11.83	5.71	11.45	13.62	26.3	17.29	12.7833	8.95667	9.66333	19.07	GO:005121	MF:phosphoprotein binding;	------	------	------	------	ENOG410YE21	S:Function unknown	XP_004246688.1	interactor of constitutive active ROPs 2, chloroplastic [Solanum lycopersicum]	sp|Q9ZQC5|ICR2_ARATH;	Interactor of constitutive active ROPs 2, chloroplastic OS=Arabidopsis thaliana OX=3702 GN=ICR2 PE=1 SV=1;	------	------	------
gene_Solyc09g007830.3	Solyc09g007830.3	Cytokinin riboside 5'-monophosphate phosphoribohydrolase (AHRD V3.3 *** A0A1U8E671_CAPAN)	4.06	7.25	19.59	6.95	12.91	6.38	9.63	3.73	10.11	13.37	18	25.51	10.3	8.74667	7.82333	18.96	GO:0009691;GO:0005634;GO:0005829;GO:0102682;GO:001679	BP:cytokinin biosynthetic process;CC:nucleus;CC:cytosol;MF:N6;MF:hydrolase activity, hydrolyzing N-glycosyl compounds;	K22522	LOG	------	------	COG1611	S:Function unknown	XP_004246656.1	cytokinin riboside 5'-monophosphate phosphoribohydrolase LOG3 [Solanum lycopersicum]	sp|Q8L8B8|LOG3_ARATH;	Cytokinin riboside 5'-monophosphate phosphoribohydrolase LOG3 OS=Arabidopsis thaliana OX=3702 GN=LOG3 PE=1 SV=1;	PF03641.16;PF18306.3	Lysine_decarbox;LDcluster4	Possible lysine decarboxylase;SLOG cluster4 family
gene_Solyc09g008430.4	Solyc09g008430.4	CHY zinc finger family protein, expressed (AHRD V3.3 *** Q337P2_ORYSJ)	0.23	0.13	0.28	1.67	0.6	0.95	0.55	0.33	0.45	3.07	3.19	1.78	0.213333	1.07333	0.443333	2.68	GO:0016567;GO:0006511;GO:0005634;GO:0016021;GO:0008270;GO:006163	BP:protein ubiquitination;BP:ubiquitin-dependent protein catabolic process;CC:nucleus;CC:integral component of membrane;MF:zinc ion binding;MF:ubiquitin protein ligase activity;	K10144	RCHY1, PIRH2	map04120	Ubiquitin mediated proteolysis	ENOG410XXHF	S:Function unknown	XP_004246608.1	E3 ubiquitin-protein ligase RZFP34 [Solanum lycopersicum]	sp|Q9FFB6|ZFP34_ARATH;	E3 ubiquitin-protein ligase RZFP34 OS=Arabidopsis thaliana OX=3702 GN=RZPF34 PE=1 SV=1;	PF14599.8;PF05495.14;PF13639.8;PF13445.8;PF14634.8;PF00097.27;PF13923.8;PF13920.8;PF17123.7;PF15227.8	zinc_ribbon_6;zf-CHY;zf-RING_2;zf-RING_UBOX;zf-RING_5;zf-C3HC4;zf-C3HC4_2;zf-C3HC4_3;zf-RING_11;zf-C3HC4_4	Zinc-ribbon;CHY zinc finger;Ring finger domain;RING-type zinc-finger;zinc-RING finger domain;Zinc finger, C3HC4 type;Zinc finger, C3HC4 type;Zinc finger, C3HC4 type;RING-like zinc finger;zinc finger of C3HC4-type, RING
gene_Solyc09g008860.5	Solyc09g008860.5	leucine-rich repeat receptor-like protein kinase PXC1 (AHRD V3.11 *** tr|A0A1S4B9J1|A0A1S4B9J1_TOBAC)	9.81	9.1	16.22	5.73	10.88	6.9	11.14	4.64	9.35	9.85	26.7	16.3	11.71	7.83667	8.37667	17.6167	GO:0009834;GO:0016021;GO:0005886;GO:0005524;GO:000467	BP:plant-type secondary cell wall biogenesis;CC:integral component of membrane;CC:plasma membrane;MF:ATP binding;MF:protein kinase activity;	------	------	------	------	ENOG4111API	T:Signal transduction mechanisms	XP_004246576.2	leucine-rich repeat receptor-like protein kinase PXC1 [Solanum lycopersicum]	sp|Q9SJQ1|PXC1_ARATH;	Leucine-rich repeat receptor-like protein kinase PXC1 OS=Arabidopsis thaliana OX=3702 GN=PXC1 PE=1 SV=1;	PF07714.19;PF00069.27;PF12799.9;PF13855.8;PF08263.14	PK_Tyr_Ser-Thr;Pkinase;LRR_4;LRR_8;LRRNT_2	Protein tyrosine and serine/threonine kinase;Protein kinase domain;Leucine Rich repeats;Leucine rich repeat;Leucine rich repeat N-terminal domain
gene_Solyc09g010020.2	Solyc09g010020.2	2-oxoglutarate (2OG) and Fe(II)-dependent oxygenase superfamily protein (AHRD V3.3 *** A0A2U1NTU8_ARTAN)	43.48	47.29	50.76	93.12	44.25	71.14	51.09	71.23	46.09	30.01	23.4	22	47.1767	69.5033	56.1367	25.1367	GO:0055114;GO:0031418;GO:0046872;GO:001649	BP:oxidation-reduction process;MF:L-ascorbic acid binding;MF:metal ion binding;MF:oxidoreductase activity;	------	------	------	------	COG3491	S:Function unknown	XP_004246496.1	1-aminocyclopropane-1-carboxylate oxidase homolog 1 [Solanum lycopersicum]	sp|Q84MB3|ACCH1_ARATH;	1-aminocyclopropane-1-carboxylate oxidase homolog 1 OS=Arabidopsis thaliana OX=3702 GN=At1g06620 PE=2 SV=1;	PF03171.22;PF14226.8	2OG-FeII_Oxy;DIOX_N	2OG-F;non-haem dioxygenase in morphine synthesis N-terminal
gene_Solyc09g010810.3	Solyc09g010810.3	Kinesin-like protein (AHRD V3.3 *** A0A2G2YR28_CAPAN)	3.23	4.12	5.97	3.01	5.47	2.63	4.47	1.64	4.28	5.04	9.27	9.63	4.44	3.70333	3.46333	7.98	GO:0007018;GO:0005874;GO:0005871;GO:0009507;GO:0008017;GO:0003777;GO:0016887;GO:1990939;GO:000552	BP:microtubule-based movement;CC:microtubule;CC:kinesin complex;CC:chloroplast;MF:microtubule binding;MF:microtubule motor activity;MF:ATPase activity;MF:ATP-dependent microtubule motor activity;MF:ATP binding;	K10403	KIF22	------	------	COG5059	Z:Cytoskeleton	XP_004246873.1	kinesin-like protein KIN-10B [Solanum lycopersicum]	sp|Q5E913|KN10B_ARATH;	Kinesin-like protein KIN-10B OS=Arabidopsis thaliana OX=3702 GN=KIN10B PE=2 SV=1;	PF00225.25;PF16796.7;PF12836.9;PF00633.25;PF14579.8;PF12826.9	Kinesin;Microtub_bd;HHH_3;HHH;HHH_6;HHH_2	Kinesin motor domain;Microtubule binding;Helix-hairpin-helix motif;Helix-hairpin-helix motif;Helix-hairpin-helix motif;Helix-hairpin-helix motif
gene_Solyc09g011270.5	Solyc09g011270.5	Cysteine/histidine-rich C1 domain protein (AHRD V3.11 *** tr|A0A1P8AY95|A0A1P8AY95_ARATH)	6.43	4.77	3.69	13.87	4.68	9.43	12.78	16.73	4.28	3.61	5.03	2.46	4.96333	9.32667	11.2633	3.7	GO:0046872;GO:001630	MF:metal ion binding;MF:kinase activity;	------	------	------	------	ENOG410YXZ3	S:Function unknown	XP_019071040.1	uncharacterized protein LOC101250920 [Solanum lycopersicum]	------	------	PF03107.18	C1_2	C1 domain
gene_Solyc09g011990.1	Solyc09g011990.1	Lectin receptor kinase (AHRD V3.3 *** B8XSM9_WHEAT)	0.12	0.49	1.63	0.36	0.76	1.12	2.42	1.43	1.33	3.32	4.33	4.7	0.746667	0.746667	1.72667	4.11667	GO:0006468;GO:0042742;GO:0002229;GO:0016021;GO:0005886;GO:0004672;GO:0030246;GO:0004675;GO:000552	BP:protein phosphorylation;BP:defense response to bacterium;BP:defense response to oomycetes;CC:integral component of membrane;CC:plasma membrane;MF:protein kinase activity;MF:carbohydrate binding;MF:transmembrane receptor protein serine/threonine kinase activity;MF:ATP binding;	------	------	------	------	COG0515;COG1643	T:Signal transduction mechanisms;L:Replication, recombination and repair	XP_004246354.1	L-type lectin-domain containing receptor kinase IV.1 [Solanum lycopersicum]	sp|O80939|LRK41_ARATH;	L-type lectin-domain containing receptor kinase IV.1 OS=Arabidopsis thaliana OX=3702 GN=LECRK41 PE=2 SV=1;	PF00139.21;PF00069.27;PF07714.19	Lectin_legB;Pkinase;PK_Tyr_Ser-Thr	Legume lectin domain;Protein kinase domain;Protein tyrosine and serine/threonine kinase
gene_Solyc09g015080.3	Solyc09g015080.3	Patellin-6 (AHRD V3.3 *** A0A1U8EDI8_CAPAN)	15.63	19.85	35.54	22.24	29.06	23.15	29.61	18.83	36.91	35.44	89.02	55.28	23.6733	24.8167	28.45	59.9133	GO:0007049;GO:0051301;GO:000828	BP:cell cycle;BP:cell division;MF:lipid binding;	------	------	------	------	ENOG410XRSQ	S:Function unknown	XP_004246302.1	patellin-6 [Solanum lycopersicum]	sp|Q9SCU1|PATL6_ARATH;	Patellin-6 OS=Arabidopsis thaliana OX=3702 GN=PATL6 PE=2 SV=1;	PF00650.22;PF03765.17	CRAL_TRIO;CRAL_TRIO_N	CRAL/TRIO domain;CRAL/TRIO, N-terminal domain
gene_Solyc09g064230.3	Solyc09g064230.3	C2 calcium/lipid-binding plant phosphoribosyltransferase family protein (AHRD V3.3 *** O64492_ARATH)	0.04	0.17	0.58	0.02	0.54	0.05	0.11	0.05	1.16	0.93	6.44	2.56	0.263333	0.203333	0.44	3.31	GO:001602	CC:integral component of membrane;	------	------	------	------	ENOG410YDAD	S:Function unknown	XP_004247307.1	FT-interacting protein 1 [Solanum lycopersicum]	sp|Q9C8H3|FTIP4_ARATH;	FT-interacting protein 4 OS=Arabidopsis thaliana OX=3702 GN=FTIP4 PE=1 SV=1;	PF08372.12;PF00168.32	PRT_C;C2	Plant phosphoribosyltransferase C-terminal;C2 domain
gene_Solyc09g065170.2	Solyc09g065170.2	titin-like isoform X2 (AHRD V3.3 *-* A0A2I4FZD3_9ROSI)	0.12	0.12	0.21	0	0.18	0	0.12	0	0.14	0.2	4.79	0.48	0.15	0.06	0.086667	1.82333	------	------	------	------	------	------	------	------	XP_015087498.1	uncharacterized protein LOC107030757 isoform X1 [Solanum pennellii]	------	------	------	------	------
gene_Solyc09g065570.5	Solyc09g065570.5	Serine/threonine-protein kinase Nek2 (AHRD V3.11 *** tr|A0A1U8G1X8|A0A1U8G1X8_CAPAN)	1.33	1.59	1.52	1.13	2.32	1.48	1.53	0.79	2	2.26	7.91	3.52	1.48	1.64333	1.44	4.56333	GO:0004674;GO:0005524;GO:000467	MF:protein serine/threonine kinase activity;MF:ATP binding;MF:protein kinase activity;	K08857	NEK1_4_5	------	------	ENOG410Y7JF	T:Signal transduction mechanisms	XP_025888544.1	serine/threonine-protein kinase Nek2 isoform X2 [Solanum lycopersicum]	sp|A2ZMH2|NEK2_ORYSI;	Serine/threonine-protein kinase Nek2 OS=Oryza sativa subsp. indica OX=39946 GN=NEK2 PE=3 SV=1;	------	------	------
gene_Solyc09g072750.3	Solyc09g072750.3	Proteasome endopeptidase complex (AHRD V3.11 *-* tr|A0A2G3BI76|A0A2G3BI76_CAPCH)	502.38	299.69	428.04	195.18	405.59	379.46	431.86	116.96	320.94	935.48	699.92	1173.22	410.037	326.743	289.92	936.207	GO:001602	CC:integral component of membrane;	------	------	------	------	ENOG41117MK	S:Function unknown	XP_015169421.1	PREDICTED: tetra-peptide repeat homeobox protein 1-like isoform X1 [Solanum tuberosum]	------	------	------	------	------
gene_Solyc09g072753.1	Solyc09g072753.1	Proteasome endopeptidase complex (AHRD V3.3 *-* A0A2G3BI76_CAPCH)	29.14	10.75	19.81	10.63	28.02	19.91	36.97	7.73	24.87	97.36	82.53	105.41	19.9	19.52	23.19	95.1	GO:001602	CC:integral component of membrane;	------	------	------	------	ENOG41117MK	S:Function unknown	KAG5587493.1	hypothetical protein H5410_047927 [Solanum commersonii]	------	------	------	------	------
gene_Solyc09g074280.1	Solyc09g074280.1	Ankyrin repeat-containing protein (AHRD V3.3 *** A0A2U1QG31_ARTAN)	23.31	21.22	12.89	34.13	21.05	30.02	20.1	31.3	14.93	10.75	9.64	3.88	19.14	28.4	22.11	8.09	------	------	------	------	------	------	COG0666	S:Function unknown	XP_004247547.1	uncharacterized protein LOC101261854 [Solanum lycopersicum]	sp|D3J163|VPYL_MEDTR;	Protein VAPYRIN-LIKE OS=Medicago truncatula OX=3880 GN=VPYL PE=2 SV=1;	PF12796.9;PF13637.8;PF13606.8;PF00023.32;PF13857.8	Ank_2;Ank_4;Ank_3;Ank;Ank_5	Ankyrin repeats;Ankyrin repeats;Ankyrin repeat;Ankyrin repeat;Ankyrin repeats
gene_Solyc09g075360.5	Solyc09g075360.5	Endoglucanase (AHRD V3.11 *** tr|Q42875|Q42875_SOLLC)	6.19	10.72	23.76	9.73	24.86	10.74	22.02	6.01	25.72	30.09	82.83	63.16	13.5567	15.11	17.9167	58.6933	GO:0005975;GO:0030245;GO:0008810;GO:000455	BP:carbohydrate metabolic process;BP:cellulose catabolic process;MF:cellulase activity;MF:hydrolase activity, hydrolyzing O-glycosyl compounds;	K01179	E3.2.1.4	map00500	Starch and sucrose metabolism	ENOG410XPC9	G:Carbohydrate transport and metabolism	NP_001234882.1	endo-1,4-beta-glucanase precursor [Solanum lycopersicum]	sp|O81416|GUN17_ARATH;	Endoglucanase 17 OS=Arabidopsis thaliana OX=3702 GN=At4g02290 PE=2 SV=1;	PF00759.21	Glyco_hydro_9	Glycosyl hydrolase family 9
gene_Solyc09g075920.1	Solyc09g075920.1	Receptor-like protein kinase (AHRD V3.3 *** A0A2U1PPA0_ARTAN)	4.54	4.15	3.27	12.89	11.91	9.66	10.71	17.39	10.01	4.48	4.47	2	3.98667	11.4867	12.7033	3.65	GO:0006468;GO:0009308;GO:0048544;GO:0016021;GO:0052593;GO:0005507;GO:0052596;GO:0052595;GO:0052594;GO:0008131;GO:0005524;GO:0004672;GO:0048038;GO:0106310;GO:010631	BP:protein phosphorylation;BP:amine metabolic process;BP:recognition of pollen;CC:integral component of membrane;MF:tryptamin;MF:copper ion binding;MF:phenethylamin;MF:aliphatic-amine oxidase activity;MF:aminoaceton;MF:primary amine oxidase activity;MF:ATP binding;MF:protein kinase activity;MF:quinone binding;MF:old GO;MF:old GO;	------	------	------	------	COG0515	T:Signal transduction mechanisms	XP_019071128.1	uncharacterized protein LOC101254423 [Solanum lycopersicum]	sp|Q7FAZ3|LERK1_ORYSJ;	G-type lectin S-receptor-like serine/threonine-protein kinase LECRK1 OS=Oryza sativa subsp. japonica OX=39947 GN=LECRK1 PE=2 SV=1;	PF00069.27;PF07714.19;PF01453.26;PF00954.22;PF17667.3	Pkinase;PK_Tyr_Ser-Thr;B_lectin;S_locus_glycop;Pkinase_fungal	Protein kinase domain;Protein tyrosine and serine/threonine kinase;D-mannose binding lectin;S-locus glycoprotein domain;Fungal protein kinase
gene_Solyc09g082890.3	Solyc09g082890.3	Calcium-transporting ATPase (AHRD V3.11 *** tr|A0A2G2W173|A0A2G2W173_CAPBA)	15.65	6.92	7.97	3.03	2.11	2.38	2.6	5.08	1.98	1.4	1.23	0.99	10.18	2.50667	3.22	1.20667	GO:0043231;GO:0016021;GO:0005887;GO:0019829;GO:0005388;GO:000552	CC:intracellular membrane-bounded organelle;CC:integral component of membrane;CC:integral component of plasma membrane;MF:cation-transporting ATPase activity;MF:calcium-transporting ATPase activity;MF:ATP binding;	K01537	ATP2C	------	------	ENOG410XNNC	P:Inorganic ion transport and metabolism	XP_015086720.1	putative calcium-transporting ATPase 13, plasma membrane-type [Solanum pennellii]	sp|Q9LIK7|ACA13_ARATH;	Putative calcium-transporting ATPase 13, plasma membrane-type OS=Arabidopsis thaliana OX=3702 GN=ACA13 PE=3 SV=1;	PF00689.23;PF00122.22;PF00702.28;PF00690.28;PF13246.8;PF08282.14	Cation_ATPase_C;E1-E2_ATPase;Hydrolase;Cation_ATPase_N;Cation_ATPase;Hydrolase_3	Cation transporting ATPase, C-terminus;E1-E2 ATPase;haloacid dehalogenase-like hydrolase;Cation transporter/ATPase, N-terminus;Cation transport ATPase;haloacid dehalogenase-like hydrolase
gene_Solyc09g083435.1	Solyc09g083435.1	Proteinase inhibitor.1	324.67	308.78	209.51	856.15	1991.72	811.8	781.96	1088.55	1936.65	4068.39	2039.99	3586.65	280.987	1219.89	1269.05	3231.68	GO:0009611;GO:0005576;GO:000486	BP:response to wounding;CC:extracellular region;MF:serine-type endopeptidase inhibitor activity;	------	------	------	------	ENOG410Z25M	S:Function unknown	XP_004247654.1	wound-induced proteinase inhibitor 1 [Solanum lycopersicum]	sp|P05118|ICI1_SOLLC;	Wound-induced proteinase inhibitor 1 OS=Solanum lycopersicum OX=4081 GN=PIIF PE=2 SV=1;	PF00280.20	potato_inhibit	Potato inhibitor I family
gene_Solyc09g084460.3	Solyc09g084460.3	Protease inhibitor I (AHRD V3.3 *** Q07459_SOLTU)	0.59	0.11	0.16	0.16	0.36	0.68	2.73	0.16	3.38	4.73	37.16	12.78	0.286667	0.4	2.09	18.2233	GO:0009611;GO:0005576;GO:000486	BP:response to wounding;CC:extracellular region;MF:serine-type endopeptidase inhibitor activity;	------	------	------	------	ENOG410Z25M	S:Function unknown	XP_004247655.1	wound-induced proteinase inhibitor 1-like [Solanum lycopersicum]	sp|P05118|ICI1_SOLLC;	Wound-induced proteinase inhibitor 1 OS=Solanum lycopersicum OX=4081 GN=PIIF PE=2 SV=1;	PF00280.20	potato_inhibit	Potato inhibitor I family
gene_Solyc09g084470.3	Solyc09g084470.3	Proteinase inhibitor.1	16.24	63.8	93.55	540.92	1462.87	435.15	379.59	243.97	873.59	5803.87	3182.44	6056.69	57.8633	812.98	499.05	5014.33	GO:0009611;GO:0005576;GO:000486	BP:response to wounding;CC:extracellular region;MF:serine-type endopeptidase inhibitor activity;	------	------	------	------	ENOG410Z25M	S:Function unknown	NP_001295870.1	wound-induced proteinase inhibitor 1 precursor [Solanum lycopersicum]	sp|P05118|ICI1_SOLLC;	Wound-induced proteinase inhibitor 1 OS=Solanum lycopersicum OX=4081 GN=PIIF PE=2 SV=1;	PF00280.20	potato_inhibit	Potato inhibitor I family
gene_Solyc09g084480.3	Solyc09g084480.3	Protease inhibitor I (AHRD V3.3 *** Q07459_SOLTU)	7.69	45.94	60.15	289.77	1481.38	209.25	452.19	63.69	1628.2	5129.52	3224.95	8618.36	37.9267	660.133	714.693	5657.61	GO:0009611;GO:0005576;GO:000486	BP:response to wounding;CC:extracellular region;MF:serine-type endopeptidase inhibitor activity;	------	------	------	------	ENOG410Z25M	S:Function unknown	XP_004247657.1	wound-induced proteinase inhibitor 1-like [Solanum lycopersicum]	sp|P16231|ICI1_SOLPE;	Wound-induced proteinase inhibitor 1 OS=Solanum peruvianum OX=4082 PE=3 SV=1;	PF00280.20	potato_inhibit	Potato inhibitor I family
gene_Solyc09g089650.1	Solyc09g089650.1	hypothetical protein (AHRD V3.3 *** AT1G04330.1)	76.02	57.3	58.5	63.47	30.61	78.02	21.22	42.99	37.49	13.73	17.29	11.68	63.94	57.3667	33.9	14.2333	GO:0005737;GO:000563	CC:cytoplasm;CC:nucleus;	------	------	------	------	ENOG411154Q	S:Function unknown	XP_004247704.1	uncharacterized protein At4g14450, chloroplastic [Solanum lycopersicum]	sp|Q6NN02|Y4445_ARATH;	Uncharacterized protein At4g14450, chloroplastic OS=Arabidopsis thaliana OX=3702 GN=At4g14450 PE=2 SV=1;	------	------	------
gene_Solyc09g091270.3	Solyc09g091270.3	cotton fiber protein (AHRD V3.3 *** AT5G13880.2)	11.3	11.46	14.1	7.68	8.67	7.36	10.06	3.84	7.71	9.97	24.97	18.04	12.2867	7.90333	7.20333	17.66	------	------	------	------	------	------	ENOG410YRIU	S:Function unknown	XP_004247817.1	uncharacterized protein LOC101252722 [Solanum lycopersicum]	------	------	PF05553.13	DUF761	Cotton fibre expressed protein
gene_Solyc09g091660.3	Solyc09g091660.3	Pleiotropic drug resistance protein (AHRD V3.3 *** C8CA13_CUCSA)	124.09	85.51	80.56	209.33	146.35	190.43	137.45	187.49	99.81	73.09	75.27	45.59	96.72	182.037	141.583	64.65	GO:0016020;GO:0016021;GO:0042626;GO:000552	CC:membrane;CC:integral component of membrane;MF:ATPase activity, coupled to transmembrane movement of substances;MF:ATP binding;	K08711	PDR, CDR1	map02010	ABC transporters	COG1131;COG0842	V:Defense mechanisms;	XP_004247841.1	pleiotropic drug resistance protein 1 [Solanum lycopersicum]	sp|Q76CU2|PDR1_TOBAC;	Pleiotropic drug resistance protein 1 OS=Nicotiana tabacum OX=4097 GN=PDR1 PE=2 SV=1;	PF01061.26;PF00005.29;PF08370.13;PF19055.2;PF13304.8;PF14510.8	ABC2_membrane;ABC_tran;PDR_assoc;ABC2_membrane_7;AAA_21;ABC_trans_N	ABC-2 type transporter;ABC transporter;Plant PDR ABC transporter associated;ABC-2 type transporter;AAA domain, putative AbiEii toxin, Type IV TA system;ABC-transporter N-terminal
gene_Solyc09g092640.3	Solyc09g092640.3	Cytochrome (AHRD V3.3 *** A0A1U8G4E5_CAPAN)	4.52	4.13	5.69	7.63	2.08	6.47	3.39	4.39	4.43	1.67	0.98	1.14	4.78	5.39333	4.07	1.26333	GO:0055114;GO:0005506;GO:0016705;GO:0004497;GO:002003	BP:oxidation-reduction process;MF:iron ion binding;MF:oxidoreductase activity, acting on paired donors, with incorporation or reduction of molecular oxygen;MF:monooxygenase activity;MF:heme binding;	------	------	------	------	COG2124	Q:Secondary metabolites biosynthesis, transport and catabolism	XP_004247905.1	cytochrome P450 83B1 [Solanum lycopersicum]	sp|O65782|C83B1_ARATH;	Cytochrome P450 83B1 OS=Arabidopsis thaliana OX=3702 GN=CYP83B1 PE=1 SV=1;	PF00067.24	p450	Cytochrome P450
gene_Solyc09g092720.3	Solyc09g092720.3	glycine-rich protein 3 short isoform-like (AHRD V3.3 *** XP_004247911.1)	69.21	47.06	72.75	29.52	67.2	58.38	54.36	40.24	71.82	136.92	181.21	190.48	63.0067	51.7	55.4733	169.537	------	------	------	------	------	------	------	------	XP_004247911.1	glycine-rich protein 3 short isoform-like [Solanum lycopersicum]	sp|P23137|GRP1_TOBAC;	Glycine-rich protein OS=Nicotiana tabacum OX=4097 GN=GRP PE=2 SV=1;	PF07172.13	GRP	Glycine rich protein family
gene_Solyc09g092760.2	Solyc09g092760.2	glycine-rich cell wall structural protein-like (AHRD V3.3 *-* XP_010326879.1)	33.53	30.48	55.63	39.12	85.14	108.71	88.96	26.45	123.13	200.06	352.17	300.98	39.88	77.6567	79.5133	284.403	------	------	------	------	------	------	------	------	XP_010326879.1	glycine-rich cell wall structural protein-like [Solanum lycopersicum]	------	------	PF07172.13	GRP	Glycine rich protein family
gene_Solyc09g098380.3	Solyc09g098380.3	Amino acid transporter (AHRD V3.3 *** A0A200PYC4_9MAGN)	2.14	2.15	2.68	0.3	0.47	1.32	1.91	1.64	0.76	0.11	0.24	0.17	2.32333	0.696667	1.43667	0.173333	GO:0006865;GO:0005774;GO:0016021;GO:000588	BP:amino acid transport;CC:vacuolar membrane;CC:integral component of membrane;CC:plasma membrane;	------	------	------	------	COG0814	E:Amino acid transport and metabolism	XP_004247988.1	amino acid transporter AVT1H [Solanum lycopersicum]	sp|Q9LFE3|AVT1H_ARATH;	Amino acid transporter AVT1H OS=Arabidopsis thaliana OX=3702 GN=AVT1H PE=3 SV=1;	PF01490.20	Aa_trans	Transmembrane amino acid transporter protein
gene_Solyc10g006150.4	Solyc10g006150.4	DUF761 domain-containing protein/DUF4408 domain-containing protein (AHRD V3.11 *** tr|A0A1Q3CP02|A0A1Q3CP02_CEPFO)	13.73	25.96	15.42	30.45	13.27	25.72	13.05	15.5	9.39	4.92	4.67	3.94	18.37	23.1467	12.6467	4.51	GO:001602	CC:integral component of membrane;	------	------	------	------	ENOG410YP1X	S:Function unknown	TMW81572.1	hypothetical protein EJD97_008883 [Solanum chilense]	------	------	PF05553.13	DUF761	Cotton fibre expressed protein
gene_Solyc10g007070.4	Solyc10g007070.4	Early nodulin-like protein.1	10.17	9.2	6.84	26.93	8.34	26.67	12.72	26.94	13.77	7.15	9.02	4.1	8.73667	20.6467	17.81	6.75667	GO:0046658;GO:0016021;GO:0005886;GO:000905	CC:anchored component of plasma membrane;CC:integral component of membrane;CC:plasma membrane;MF:electron carrier activity;	------	------	------	------	ENOG410Z06C	S:Function unknown	XP_004248258.1	early nodulin-like protein 2 [Solanum lycopersicum]	sp|Q5JNJ5|ENOL1_ORYSJ;	Early nodulin-like protein 1 OS=Oryza sativa subsp. japonica OX=39947 GN=ENODL1 PE=1 SV=1;	PF02298.19	Cu_bind_like	Plastocyanin-like domain
gene_Solyc10g007660.3	Solyc10g007660.3	CASP-like protein (AHRD V3.3 *** A0A2I4EBH2_9ROSI)	0.19	0	0.39	0.13	0.48	0	0.29	0	0.22	1.93	5.27	3.63	0.193333	0.203333	0.17	3.61	GO:0016021;GO:0005886;GO:005153	CC:integral component of membrane;CC:plasma membrane;MF:4 iron, 4 sulfur cluster binding;	------	------	------	------	ENOG4112CWQ	S:Function unknown	XP_010327104.1	CASP-like protein 2A1 [Solanum lycopersicum]	sp|A7QBZ2|CSPLA_VITVI;	CASP-like protein 2A1 OS=Vitis vinifera OX=29760 GN=VIT_01s0010g01870 PE=2 SV=1;	PF04535.14;PF01284.25	DUF588;MARVEL	Domain of unknown function;Membrane-associating domain
gene_Solyc10g008930.1	Solyc10g008930.1	glutaredoxin-C9-like (AHRD V3.3 *** A0A1U8EMM6_CAPAN)	3.96	5.9	16.81	1.65	10.97	1.14	5.75	2	6.85	16.42	9.88	30.46	8.89	4.58667	4.86667	18.92	GO:0045454;GO:0005737;GO:0015035;GO:000905	BP:cell redox homeostasis;CC:cytoplasm;MF:protein disulfide oxidoreductase activity;MF:electron carrier activity;	------	------	------	------	COG0695	O:Posttranslational modification, protein turnover, chaperones	XP_010327036.1	glutaredoxin-C9-like isoform X2 [Solanum lycopersicum]	sp|Q9SGP6|GRXC9_ARATH;	Glutaredoxin-C9 OS=Arabidopsis thaliana OX=3702 GN=GRXC9 PE=1 SV=1;	PF00462.26	Glutaredoxin	Glutaredoxin
gene_Solyc10g011940.1	Solyc10g011940.1	SNF2_N domain-containing protein/Chromo domain-containing protein (AHRD V3.3 *-* A0A1Q3BJ60_CEPFO)	1.07	0.81	0.31	0.25	0.27	0.1	0.36	0.08	0.12	0.29	4.57	0.54	0.73	0.206667	0.186667	1.8	GO:0046872;GO:0016787;GO:0004386;GO:000367	MF:metal ion binding;MF:hydrolase activity;MF:helicase activity;MF:DNA binding;	K11642	CHD3, MI2A	------	------	COG0553	L:Replication, recombination and repair	XP_010326988.1	chromodomain-helicase-DNA-binding protein 5-like [Solanum lycopersicum]	sp|F4KBP5|CHR4_ARATH;	Protein CHROMATIN REMODELING 4 OS=Arabidopsis thaliana OX=3702 GN=CHR4 PE=2 SV=1;	PF00385.26;PF00271.33	Chromo;Helicase_C	Chromo;Helicase conserved C-terminal domain
gene_Solyc10g011960.3	Solyc10g011960.3	Heavy metal-associated isoprenylated plant protein (AHRD V3.3 *-* A0A2R6RCM9_ACTCH)	1.02	1.14	1.19	1.61	1.18	1.4	1.38	0.83	0.86	2.14	17.15	2.91	1.11667	1.39667	1.02333	7.4	GO:0016787;GO:004687	MF:hydrolase activity;MF:metal ion binding;	------	------	------	------	COG2608	S:Function unknown	XP_004248061.1	heavy metal-associated isoprenylated plant protein 39-like [Solanum lycopersicum]	sp|O03982|HIP39_ARATH;	Heavy metal-associated isoprenylated plant protein 39 OS=Arabidopsis thaliana OX=3702 GN=HIPP39 PE=2 SV=1;	------	------	------
gene_Solyc10g044986.1	Solyc10g044986.1	Unknown protein	0	0.1	0	0	0	0	0	0	0	2.93	1.02	0.92	0.033333	0	0	1.62333	------	------	------	------	------	------	ENOG410Z83V	S:Function unknown	KAG5581257.1	hypothetical protein H5410_051884 [Solanum commersonii]	------	------	------	------	------
gene_Solyc10g047150.3	Solyc10g047150.3	50S ribosomal protein L4 (AHRD V3.3 *-* A0A2G2Y9J5_CAPAN)	14.79	13.69	20.87	8.32	7.86	16.15	14.83	18.16	16.1	2.91	4.44	4.27	16.45	10.7767	16.3633	3.87333	GO:0006412;GO:0005840;GO:0003735;GO:000372	BP:translation;CC:ribosome;MF:structural constituent of ribosome;MF:mRNA binding;	K02926	RP-L4, MRPL4, rplD	map03010	Ribosome	COG0088	J:Translation, ribosomal structure and biogenesis	PHT32435.1	50S ribosomal protein L4 [Capsicum baccatum]	sp|C3P9Q6|RL4_BACAA;	50S ribosomal protein L4 OS=Bacillus anthracis;	PF00573.24	Ribosomal_L4	Ribosomal protein L4/L1 family
gene_Solyc10g049640.2	Solyc10g049640.2	Amino acid/polyamine transporter I (AHRD V3.3 *** A0A200R342_9MAGN)	0.73	0.16	0.84	0.89	1.88	0.6	0.85	0.74	1.86	2.63	4.58	4.27	0.576667	1.12333	1.15	3.82667	GO:0055085;GO:0016020;GO:0016021;GO:0005886;GO:002285	BP:transmembrane transport;CC:membrane;CC:integral component of membrane;CC:plasma membrane;MF:transmembrane transporter activity;	------	------	------	------	COG0531	E:Amino acid transport and metabolism	XP_004248916.1	probable polyamine transporter At3g19553 [Solanum lycopersicum]	sp|Q9LH39|PHSD_ARATH;	Probable polyamine transporter At3g19553 OS=Arabidopsis thaliana OX=3702 GN=At3g19553 PE=3 SV=1;	PF13520.8;PF00324.23	AA_permease_2;AA_permease	Amino acid permease;Amino acid permease
gene_Solyc10g050890.2	Solyc10g050890.2	nitrite reductase 2	6.54	5.17	5.31	3.59	2.01	2.39	2.62	2.92	2.97	4.17	10.96	3.68	5.67333	2.66333	2.83667	6.27	GO:0055114;GO:0051539;GO:0048307;GO:0051536;GO:0020037;GO:0046872;GO:001649	BP:oxidation-reduction process;MF:4 iron, 4 sulfur cluster binding;MF:ferredoxin-nitrite reductase activity;MF:iron-sulfur cluster binding;MF:heme binding;MF:metal ion binding;MF:oxidoreductase activity;	K00366	nirA	map00910	Nitrogen metabolism	COG0155	C:Energy production and conversion	XP_004248736.1	ferredoxin--nitrite reductase, chloroplastic [Solanum lycopersicum]	sp|P38500|NIR_BETPN;	Ferredoxin--nitrite reductase, chloroplastic OS=Betula pendula OX=3505 GN=NIR1 PE=2 SV=1;	PF01077.24;PF03460.19	NIR_SIR;NIR_SIR_ferr	Nitrite and sulphite reductase 4Fe-4S domain;Nitrite/Sulfite reductase ferredoxin-like half domain
gene_Solyc10g051140.4	Solyc10g051140.4	Protein ENHANCED DOWNY MILDEW 2 (AHRD V3.11 *** tr|A0A2G2YIJ3|A0A2G2YIJ3_CAPAN)	1.33	1.86	1.95	1.12	1.21	1.09	1.37	1.54	1.66	2.14	5.54	2.52	1.71333	1.14	1.52333	3.4	GO:0005634;GO:004687	CC:nucleus;MF:metal ion binding;	------	------	------	------	ENOG41124RI;ENOG410YE57	S:Function unknown;	XP_010327441.1	protein ENHANCED DOWNY MILDEW 2-like isoform X1 [Solanum lycopersicum]	sp|F4K3G5|EDM2_ARATH;	Protein ENHANCED DOWNY MILDEW 2 OS=Arabidopsis thaliana OX=3702 GN=EDM2 PE=1 SV=1;	PF12047.10	DNMT1-RFD	Cytosine specific DNA methyltransferase replication foci domain
gene_Solyc10g052500.2	Solyc10g052500.2	Isoflavone reductase homolog (AHRD V3.3 *** IFRH_SOLTU)	14.93	16.21	13.61	35.59	55.16	32.13	19.86	55.36	34.92	108.36	62.85	72.28	14.9167	40.96	36.7133	81.1633	GO:0005737;GO:001649	CC:cytoplasm;MF:oxidoreductase activity;	K23050	PCBER1	------	------	ENOG410Y0DY;ENOG411028Q	S:Function unknown;	XP_004248712.1	isoflavone reductase homolog [Solanum lycopersicum]	sp|P52578|IFRH_SOLTU;	Isoflavone reductase homolog OS=Solanum tuberosum OX=4113 PE=2 SV=1;	PF05368.15;PF13460.8;PF01370.23;PF03435.20;PF16363.7;PF01073.21	NmrA;NAD_binding_10;Epimerase;Sacchrp_dh_NADP;GDP_Man_Dehyd;3Beta_HSD	NmrA-like family;NA;NAD dependent epimerase/dehydratase family;Saccharopine dehydrogenase NADP binding domain;GDP-mannose 4,6 dehydratase;3-beta hydroxysteroid dehydrogenase/isomerase family
gene_Solyc10g055390.2	Solyc10g055390.2	Major facilitator superfamily protein (AHRD V3.3 *** Q9SW40_ARATH)	58.51	52.12	50.64	60.42	43.53	57.4	45.78	75.12	43.19	30.34	29.22	11.67	53.7567	53.7833	54.6967	23.7433	GO:0006817;GO:0016021;GO:001602	BP:phosphate ion transport;CC:integral component of membrane;CC:membrane;	------	------	------	------	ENOG410Y7MY	S:Function unknown	XP_004248658.1	protein NUCLEAR FUSION DEFECTIVE 4 [Solanum lycopersicum]	sp|F4I9E1|NFD4_ARATH;	Protein NUCLEAR FUSION DEFECTIVE 4 OS=Arabidopsis thaliana OX=3702 GN=NFD4 PE=3 SV=1;	PF06813.15	Nodulin-like	Nodulin-like
gene_Solyc10g075050.2	Solyc10g075050.2	Non-specific lipid-transfer protein (AHRD V3.3 *** K4D1U7_SOLLC)	0	0.15	0.1	0	0.48	0	0.31	0	0.6	1.15	3.58	4.17	0.083333	0.16	0.303333	2.96667	GO:0006869;GO:0016020;GO:000828	BP:lipid transport;CC:membrane;MF:lipid binding;	------	------	------	------	ENOG410YWBC	U:Intracellular trafficking, secretion, and vesicular transport	NP_001316315.1	non-specific lipid-transfer protein 2-like precursor [Solanum lycopersicum]	sp|P93224|NLTP2_SOLLC;	Non-specific lipid-transfer protein 2 OS=Solanum lycopersicum OX=4081 GN=LE16 PE=2 SV=1;	PF00234.24;PF14368.8	Tryp_alpha_amyl;LTP_2	Protease inhibitor/seed storage/LTP family;Probable lipid transfer
gene_Solyc10g075160.1	Solyc10g075160.1	Ferredoxin (AHRD V3.3 *** K4D1V7_SOLLC)	227.38	320.73	340.62	668.4	1169.3	704.23	835.11	681.63	1150.68	1947.77	1160.73	2138.83	296.243	847.31	889.14	1749.11	GO:0009507;GO:0046872;GO:0051536;GO:0051537;GO:000905	CC:chloroplast;MF:metal ion binding;MF:iron-sulfur cluster binding;MF:2 iron, 2 sulfur cluster binding;MF:electron carrier activity;	K02639	petF	map00195	Photosynthesis	COG0633	C:Energy production and conversion	XP_004249046.2	ferredoxin [Solanum lycopersicum]	sp|Q43517|FER1_SOLLC;	Ferredoxin-1, chloroplastic OS=Solanum lycopersicum OX=4081 GN=SEND33 PE=2 SV=1;	PF00111.29	Fer2	2Fe-2S iron-sulfur cluster binding domain
gene_Solyc10g076480.2	Solyc10g076480.2	Ammonium transporter (AHRD V3.3 *** A0A2G2VSP2_CAPBA)	7.41	7.58	5.08	13.4	7.95	8.06	10.56	16.75	6.26	3.18	4.7	1.55	6.69	9.80333	11.19	3.14333	GO:0019740;GO:0015696;GO:0016020;GO:0005887;GO:0009506;GO:0008519;GO:001539	BP:nitrogen utilization;BP:ammonium transport;CC:membrane;CC:integral component of plasma membrane;CC:plasmodesma;MF:ammonium transmembrane transporter activity;MF:high-affinity secondary active ammonium transmembrane transporter activity;	K03320	amt, AMT, MEP	------	------	COG0004	P:Inorganic ion transport and metabolism	XP_004249068.1	ammonium transporter 2 [Solanum lycopersicum]	sp|Q9M6N7|AMT2_ARATH;	Ammonium transporter 2 OS=Arabidopsis thaliana OX=3702 GN=AMT2 PE=1 SV=2;	PF00909.23	Ammonium_transp	Ammonium Transporter Family
gene_Solyc10g078270.2	Solyc10g078270.2	WAT1-related protein (AHRD V3.3 *** K4D269_SOLLC)	0	0	0	0.13	0	0	0.15	0.06	0	0.28	3.2	0.23	0	0.043333	0.07	1.23667	GO:0016020;GO:0016021;GO:0005886;GO:002285	CC:membrane;CC:integral component of membrane;CC:plasma membrane;MF:transmembrane transporter activity;	------	------	------	------	ENOG410YD20	S:Function unknown	XP_004249118.1	WAT1-related protein At5g07050 [Solanum lycopersicum]	sp|Q9FL41|WTR38_ARATH;	WAT1-related protein At5g07050 OS=Arabidopsis thaliana OX=3702 GN=At5g07050 PE=2 SV=1;	PF00892.22	EamA	EamA-like transporter family
gene_Solyc10g078370.2	Solyc10g078370.2	Auxin Efflux Facilitator 9	3.24	2.14	4.88	2.28	3.73	1.84	3.03	1.39	4.73	3.9	18.47	7.66	3.42	2.61667	3.05	10.01	GO:0010315;GO:0009734;GO:0010252;GO:0009926;GO:0055085;GO:0005783;GO:0016021;GO:0005886;GO:001032	BP:auxin efflux;BP:auxin-activated signaling pathway;BP:auxin homeostasis;BP:auxin polar transport;BP:transmembrane transport;CC:endoplasmic reticulum;CC:integral component of membrane;CC:plasma membrane;MF:auxin efflux transmembrane transporter activity;	K13947	PIN	------	------	ENOG410YBI4	S:Function unknown	NP_001234220.1	auxin efflux carrier component 9 [Solanum lycopersicum]	sp|Q9C6B8|PINI_ARATH;	Auxin efflux carrier component 1 OS=Arabidopsis thaliana OX=3702 GN=PIN1 PE=1 SV=1;	PF03547.20	Mem_trans	Membrane transport protein
gene_Solyc10g078600.3	Solyc10g078600.3	Jacalin-related lectin 3 (AHRD V3.3 *** A0A2G2Y0W6_CAPAN)	80.31	73.36	60.03	60.08	35.41	57.63	47.1	74.34	47.28	21.61	23.7	13	71.2333	51.04	56.24	19.4367	GO:003024	MF:carbohydrate binding;	------	------	------	------	ENOG4111KSN	S:Function unknown	NP_001311467.1	jacalin-related lectin 3 [Solanum lycopersicum]	sp|F4HQX1|JAL3_ARATH;	Jacalin-related lectin 3 OS=Arabidopsis thaliana OX=3702 GN=JAL3 PE=2 SV=1;	PF01419.19	Jacalin	Jacalin-like lectin domain
gene_Solyc10g079240.2	Solyc10g079240.2	SUN-like protein 1	0.68	0.77	1.17	0.71	0.59	0.63	1.46	1.25	0.93	11.27	14.07	10.09	0.873333	0.643333	1.21333	11.81	GO:000551	MF:protein binding;	------	------	------	------	ENOG41119TP	S:Function unknown	NP_001233793.1	putative calmodulin binding protein SUN [Solanum lycopersicum]	sp|A0A1P8BH03|IQD12_ARATH;	Protein IQ-DOMAIN 12 OS=Arabidopsis thaliana OX=3702 GN=IQD12 PE=1 SV=1;	PF13178.8;PF00612.29	DUF4005;IQ	Protein of unknown function;IQ calmodulin-binding motif
gene_Solyc10g079860.2	Solyc10g079860.2	LEQB L.esculentum TomQ'b beta(1,3)glucanase	41.08	21.48	32.01	21.37	26.66	29.93	33.05	14.29	28.74	58.86	59.98	66.37	31.5233	25.9867	25.36	61.7367	GO:0005975;GO:0006952;GO:0048046;GO:0046658;GO:0004553;GO:004297	BP:carbohydrate metabolic process;BP:defense response;CC:apoplast;CC:anchored component of plasma membrane;MF:hydrolase activity, hydrolyzing O-glycosyl compounds;MF:glucan endo-1,3-beta-D-glucosidase activity;	------	------	------	------	ENOG410YAHP	G:Carbohydrate transport and metabolism	NP_001234158.2	glucan endo-1,3-beta-D-glucosidase precursor [Solanum lycopersicum]	sp|P36401|E13H_TOBAC;	Glucan endo-1,3-beta-glucosidase, acidic isoform PR-Q' OS=Nicotiana tabacum OX=4097 PE=1 SV=1;	PF00332.20	Glyco_hydro_17	Glycosyl hydrolases family 17
gene_Solyc10g080230.2	Solyc10g080230.2	Remorin (AHRD V3.3 *** A0A200Q6K8_9MAGN)	25.09	21.5	18.91	19.69	8.63	13.26	11.96	22.01	13.79	5.83	8.1	3.79	21.8333	13.86	15.92	5.90667	------	------	------	------	------	------	ENOG410YBQG	S:Function unknown	XP_004249270.1	remorin 4.1 [Solanum lycopersicum]	sp|Q93YN8|RMR41_ARATH;	Remorin 4.1 OS=Arabidopsis thaliana OX=3702 GN=REM4.1 PE=1 SV=1;	PF03763.15	Remorin_C	Remorin, C-terminal region
gene_Solyc10g080670.2	Solyc10g080670.2	Transmembrane protein, putative (AHRD V3.3 *** A2Q5V9_MEDTR)	126.28	148.52	115.15	149.33	83.3	140.49	120.71	164.75	123.08	71.55	58.96	41.24	129.983	124.373	136.18	57.25	GO:001602	CC:integral component of membrane;	------	------	------	------	ENOG410YZPN	S:Function unknown	XP_004249300.1	uncharacterized protein LOC101267365 [Solanum lycopersicum]	------	------	------	------	------
gene_Solyc10g083310.2	Solyc10g083310.2	Kinesin-like protein (AHRD V3.3 *** A0A2G2YN20_CAPAN)	1.92	1.4	3.72	1.7	3.8	1.71	2.97	1.1	3	3.9	5.01	6.62	2.34667	2.40333	2.35667	5.17667	GO:0007018;GO:0008574;GO:0008017;GO:0003777;GO:1990939;GO:000552	BP:microtubule-based movement;MF:ATP-dependent microtubule motor activity, plus-end-directed;MF:microtubule binding;MF:microtubule motor activity;MF:ATP-dependent microtubule motor activity;MF:ATP binding;	K10398	KIF11, EG5	------	------	COG5059	Z:Cytoskeleton	XP_004249436.1	kinesin-like protein KIN-5C isoform X1 [Solanum lycopersicum]	sp|O23826|KN5C_TOBAC;	Kinesin-like protein KIN-5C OS=Nicotiana tabacum OX=4097 GN=KIN5C PE=1 SV=1;	PF00225.25;PF16796.7	Kinesin;Microtub_bd	Kinesin motor domain;Microtubule binding
gene_Solyc10g084290.2	Solyc10g084290.2	Interactor of constitutive active ROPs (AHRD V3.3 *** A0A2K3PRJ7_TRIPR)	2.65	2.86	5.27	2.36	3.49	2.04	3.04	1.62	3.09	3.91	6.47	5.6	3.59333	2.63	2.58333	5.32667	------	------	------	------	------	------	ENOG410YE21	S:Function unknown	XP_004249502.1	interactor of constitutive active ROPs 2, chloroplastic-like [Solanum lycopersicum]	sp|Q9ZQC5|ICR2_ARATH;	Interactor of constitutive active ROPs 2, chloroplastic OS=Arabidopsis thaliana OX=3702 GN=ICR2 PE=1 SV=1;	------	------	------
gene_Solyc10g084430.2	Solyc10g084430.2	RING/U-box superfamily protein (AHRD V3.3 *** A0A2U1Q288_ARTAN)	0	0	0.16	0.1	0.15	0.3	0.74	0.39	0.7	2.01	2.71	3.45	0.053333	0.183333	0.61	2.72333	GO:0009630;GO:0016567;GO:0006511;GO:0005737;GO:0009501;GO:0061630;GO:000484	BP:gravitropism;BP:protein ubiquitination;BP:ubiquitin-dependent protein catabolic process;CC:cytoplasm;CC:amyloplast;MF:ubiquitin protein ligase activity;MF:ubiquitin-protein transferase activity;	------	------	------	------	ENOG41121N2	O:Posttranslational modification, protein turnover, chaperones	XP_004249512.1	E3 ubiquitin-protein ligase SGR9, amyloplastic-like [Solanum lycopersicum]	sp|Q8GXF8|SHGR9_ARATH;	E3 ubiquitin-protein ligase SGR9, amyloplastic OS=Arabidopsis thaliana OX=3702 GN=SGR9 PE=1 SV=1;	PF13639.8;PF17123.7;PF13923.8;PF12678.9;PF13920.8;PF13445.8;PF14634.8	zf-RING_2;zf-RING_11;zf-C3HC4_2;zf-rbx1;zf-C3HC4_3;zf-RING_UBOX;zf-RING_5	Ring finger domain;RING-like zinc finger;Zinc finger, C3HC4 type;RING-H2 zinc finger domain;Zinc finger, C3HC4 type;RING-type zinc-finger;zinc-RING finger domain
gene_Solyc10g085750.2	Solyc10g085750.2	Polyadenylate-binding protein (AHRD V3.3 *** A0A2G3BFC7_CAPCH)	0.09	0.25	0.13	0.25	0.2	0.18	0.32	0.04	0.17	0.53	1.72	0.59	0.156667	0.21	0.176667	0.946667	GO:0005737;GO:0005829;GO:1990904;GO:0005634;GO:0008143;GO:0008266;GO:0003723;GO:0003676;GO:000373	CC:cytoplasm;CC:cytosol;CC:ribonucleoprotein complex;CC:nucleus;MF:pol;MF:pol;MF:RNA binding;MF:nucleic acid binding;MF:mRNA 3'-UTR binding;	K13126	PABPC	map03018;map03015	RNA degradation;mRNA surveillance pathway	ENOG410XR5X	S:Function unknown	XP_004249577.1	polyadenylate-binding protein 7-like [Solanum lycopersicum]	sp|Q9ZQA8|PABP7_ARATH;	Polyadenylate-binding protein 7 OS=Arabidopsis thaliana OX=3702 GN=PAB7 PE=2 SV=1;	PF00076.24;PF00658.20	RRM_1;PABP	RNA recognition motif.;Poly-adenylate binding protein, unique domain
gene_Solyc10g086180.2	Solyc10g086180.2	Phenylalanine ammonia-lyase (AHRD V3.3 *** A0A2G2VU16_CAPBA)	81.95	71.94	71.64	65.94	98.18	39.7	87.19	48.44	121.27	157.48	124.71	200.45	75.1767	67.94	85.6333	160.88	GO:0009800;GO:0006559;GO:0005737;GO:0045548;GO:001684	BP:cinnamic acid biosynthetic process;BP:L-phenylalanine catabolic process;CC:cytoplasm;MF:phenylalanine ammonia-lyase activity;MF:ammonia-lyase activity;	K10775	PAL	map00940;map00360	Phenylpropanoid biosynthesis;Phenylalanine metabolism	COG2986	E:Amino acid transport and metabolism	XP_004249558.1	phenylalanine ammonia-lyase [Solanum lycopersicum]	sp|P35513|PAL2_TOBAC;	Phenylalanine ammonia-lyase OS=Nicotiana tabacum OX=4097 GN=PALA PE=2 SV=2;	PF00221.21	Lyase_aromatic	Aromatic amino acid lyase
gene_Solyc10g086340.1	Solyc10g086340.1	Kinesin (AHRD V3.3 *** A0A200PZ85_9MAGN)	2.35	2.86	4.16	1.71	3.19	1.83	2.56	1.26	2.95	2.77	6.97	5.67	3.12333	2.24333	2.25667	5.13667	GO:0007018;GO:0008574;GO:0008017;GO:0003777;GO:1990939;GO:000552	BP:microtubule-based movement;MF:ATP-dependent microtubule motor activity, plus-end-directed;MF:microtubule binding;MF:microtubule motor activity;MF:ATP-dependent microtubule motor activity;MF:ATP binding;	K10398	KIF11, EG5	------	------	COG5059	Z:Cytoskeleton	XP_004249556.1	kinesin-like protein KIN-5B [Solanum lycopersicum]	sp|Q0WQJ7|KN5B_ARATH;	Kinesin-like protein KIN-5B OS=Arabidopsis thaliana OX=3702 GN=KIN5B PE=2 SV=1;	PF00225.25;PF16796.7	Kinesin;Microtub_bd	Kinesin motor domain;Microtubule binding
gene_Solyc11g005630.1	Solyc11g005630.1	G-type lectin S-receptor-like serine/threonine-protein kinase LECRK3 (AHRD V3.3 *** A0A2I4HSV3_9ROSI)	34.54	33.1	32.93	79.09	40.48	60.73	47.31	77.73	31.53	22.93	21.39	17.46	33.5233	60.1	52.19	20.5933	GO:0006468;GO:0048544;GO:0016021;GO:0030246;GO:0005524;GO:0004672;GO:0106310;GO:010631	BP:protein phosphorylation;BP:recognition of pollen;CC:integral component of membrane;MF:carbohydrate binding;MF:ATP binding;MF:protein kinase activity;MF:old GO;MF:old GO;	------	------	------	------	ENOG410YFGD;COG0515	U:Intracellular trafficking, secretion, and vesicular transport;T:Signal transduction mechanisms	XP_004249884.2	G-type lectin S-receptor-like serine/threonine-protein kinase LECRK3, partial [Solanum lycopersicum]	sp|Q25AG3|LERK3_ORYSI;	G-type lectin S-receptor-like serine/threonine-protein kinase LECRK3 OS=Oryza sativa subsp. indica OX=39946 GN=LECRK3 PE=3 SV=2;	PF00069.27;PF07714.19;PF01453.26;PF00954.22;PF03109.18;PF08276.13	Pkinase;PK_Tyr_Ser-Thr;B_lectin;S_locus_glycop;ABC1;PAN_2	Protein kinase domain;Protein tyrosine and serine/threonine kinase;D-mannose binding lectin;S-locus glycoprotein domain;ABC1 atypical kinase-like domain;PAN-like domain
gene_Solyc11g006030.1	Solyc11g006030.1	RING-type E3 ubiquitin transferase (AHRD V3.3 *** A0A2G2VFH1_CAPBA)	2.76	3.01	2.73	7.01	5.66	6.38	3.58	5.77	1.88	1.37	1.03	0.92	2.83333	6.35	3.74333	1.10667	GO:0016567;GO:000484	BP:protein ubiquitination;MF:ubiquitin-protein transferase activity;	------	------	------	------	ENOG410Y3P9	O:Posttranslational modification, protein turnover, chaperones	XP_004250456.2	U-box domain-containing protein 21-like [Solanum lycopersicum]	sp|Q5PNY6|PUB21_ARATH;	U-box domain-containing protein 21 OS=Arabidopsis thaliana OX=3702 GN=PUB21 PE=2 SV=1;	PF04564.17;PF11789.10	U-box;zf-Nse	U-box domain;Zinc-finger of the MIZ type in Nse subunit
gene_Solyc11g006230.3	Solyc11g006230.3	GRF1-interacting factor.1	5.83	9.37	37.62	18.91	22.41	20.04	22.33	19.24	26.12	30.82	61.62	55.44	17.6067	20.4533	22.5633	49.2933	GO:0009955;GO:0008283;GO:0048366;GO:0045944;GO:0048825;GO:0051301;GO:0005634;GO:000371	BP:adaxial/abaxial pattern specification;BP:cell proliferation;BP:leaf development;BP:positive regulation of transcription from RNA polymerase II promoter;BP:cotyledon development;BP:cell division;CC:nucleus;MF:transcription coactivator activity;	------	------	------	------	ENOG41128HA	K:Transcription	XP_004249920.1	GRF1-interacting factor 1 [Solanum lycopersicum]	sp|Q8L8A5|GIF1_ARATH;	GRF1-interacting factor 1 OS=Arabidopsis thaliana OX=3702 GN=GIF1 PE=1 SV=1;	PF05030.14	SSXT	SSXT protein
gene_Solyc11g006710.2	Solyc11g006710.2	Cationic amino acid transporter (AHRD V3.3 *** S8DTC6_9LAMI)	0.27	0.24	0.58	0.46	0.58	0.36	0.69	0.17	0.38	0.57	15.8	2.49	0.363333	0.466667	0.413333	6.28667	GO:0006865;GO:0055085;GO:0016021;GO:0016020;GO:0005886;GO:0022857;GO:001517	BP:amino acid transport;BP:transmembrane transport;CC:integral component of membrane;CC:membrane;CC:plasma membrane;MF:transmembrane transporter activity;MF:amino acid transmembrane transporter activity;	------	------	------	------	COG0531	E:Amino acid transport and metabolism	XP_004250472.1	cationic amino acid transporter 7, chloroplastic [Solanum lycopersicum]	sp|Q9SQZ0|CAAT7_ARATH;	Cationic amino acid transporter 7, chloroplastic OS=Arabidopsis thaliana OX=3702 GN=CAT7 PE=3 SV=1;	PF13520.8;PF00324.23;PF13906.8	AA_permease_2;AA_permease;AA_permease_C	Amino acid permease;Amino acid permease;C-terminus of AA_permease
gene_Solyc11g007980.2	Solyc11g007980.2	Cytochrome (AHRD V3.3 *** A0A1U8F0H8_CAPAN)	0.96	0.61	0.2	6.55	0.86	4.88	1.51	1.88	0.86	0.31	0.35	0.25	0.59	4.09667	1.41667	0.303333	GO:0055114;GO:0005506;GO:0016705;GO:0004497;GO:002003	BP:oxidation-reduction process;MF:iron ion binding;MF:oxidoreductase activity, acting on paired donors, with incorporation or reduction of molecular oxygen;MF:monooxygenase activity;MF:heme binding;	K15805	EAH	map00909	Sesquiterpenoid and triterpenoid biosynthesis	COG2124	Q:Secondary metabolites biosynthesis, transport and catabolism	XP_004250027.1	cytochrome P450 71D7 [Solanum lycopersicum]	sp|P93531|C71D7_SOLCH;	Cytochrome P450 71D7 OS=Solanum chacoense OX=4108 GN=CYP71D7 PE=3 SV=1;	PF00067.24	p450	Cytochrome P450
gene_Solyc11g009080.2	Solyc11g009080.2	DAHP synthase.1	134.23	164.44	203.39	175.13	304.48	166.27	292.19	172.4	355.39	419.74	464.43	643.71	167.353	215.293	273.327	509.293	GO:0009423;GO:0008652;GO:0009073;GO:0009507;GO:000384	BP:chorismate biosynthetic process;BP:cellular amino acid biosynthetic process;BP:aromatic amino acid family biosynthetic process;CC:chloroplast;MF:3-deoxy-7-phosphoheptulonate synthase activity;	K01626	E2.5.1.54, aroF, aroG, aroH	map00400	Phenylalanine, tyrosine and tryptophan biosynthesis	COG3200	E:Amino acid transport and metabolism	NP_001234415.2	phospho-2-dehydro-3-deoxyheptonate aldolase 1, chloroplastic [Solanum lycopersicum]	sp|P37215|AROF_SOLLC;	Phospho-2-dehydro-3-deoxyheptonate aldolase 1, chloroplastic OS=Solanum lycopersicum OX=4081 PE=2 SV=1;	PF01474.18	DAHP_synth_2	Class-II DAHP synthetase family
gene_Solyc11g011970.2	Solyc11g011970.2	Protein-tyrosine phosphatase (AHRD V3.3 *** A0A200RBI0_9MAGN)	51.28	58.17	53.92	60.12	36.47	57.73	51.4	79.56	47.81	23.54	23.92	16.17	54.4567	51.44	59.59	21.21	GO:0005737;GO:000472	CC:cytoplasm;MF:protein tyrosine phosphatase activity;	K18045	SIW14, OCA3	------	------	COG2365	T:Signal transduction mechanisms	XP_010312732.1	tyrosine-protein phosphatase DSP1 isoform X2 [Solanum lycopersicum]	sp|Q9ZVN4|DSP1_ARATH;	Tyrosine-protein phosphatase DSP1 OS=Arabidopsis thaliana OX=3702 GN=DSP1 PE=1 SV=1;	PF03162.15;PF13350.8	Y_phosphatase2;Y_phosphatase3	Tyrosine phosphatase family;Tyrosine phosphatase family
gene_Solyc11g017270.2	Solyc11g017270.2	leucine-rich repeat receptor-like tyrosine-protein kinase PXC3 (AHRD V3.3 *** A0A1U8GF47_CAPAN)	42.46	31.95	32.41	56.03	41.04	48.56	39.71	70.52	39.19	24.31	24.78	18.17	35.6067	48.5433	49.8067	22.42	GO:0006468;GO:0016021;GO:0005886;GO:0033612;GO:0004672;GO:000552	BP:protein phosphorylation;CC:integral component of membrane;CC:plasma membrane;MF:receptor serine/threonine kinase binding;MF:protein kinase activity;MF:ATP binding;	------	------	------	------	COG4886	S:Function unknown	XP_015056547.1	leucine-rich repeat receptor-like tyrosine-protein kinase PXC3 [Solanum pennellii]	sp|O22938|PXC3_ARATH;	Leucine-rich repeat receptor-like tyrosine-protein kinase PXC3 OS=Arabidopsis thaliana OX=3702 GN=PXC3 PE=2 SV=1;	PF13855.8;PF12799.9;PF07714.19;PF00069.27;PF08263.14	LRR_8;LRR_4;PK_Tyr_Ser-Thr;Pkinase;LRRNT_2	Leucine rich repeat;Leucine Rich repeats;Protein tyrosine and serine/threonine kinase;Protein kinase domain;Leucine rich repeat N-terminal domain
gene_Solyc11g018772.1	Solyc11g018772.1	Peroxidase (AHRD V3.3 *** M1CN26_SOLTU)	7.84	5.85	0	20.63	23.29	16.97	26.62	32.99	16.96	10.69	10.42	8.77	4.56333	20.2967	25.5233	9.96	GO:0006979;GO:0042744;GO:0055114;GO:0005576;GO:0020037;GO:0046872;GO:000460	BP:response to oxidative stress;BP:hydrogen peroxide catabolic process;BP:oxidation-reduction process;CC:extracellular region;MF:heme binding;MF:metal ion binding;MF:peroxidase activity;	K00430	E1.11.1.7	map00940	Phenylpropanoid biosynthesis	ENOG410ZJEX	G:Carbohydrate transport and metabolism	XP_025884106.1	lignin-forming anionic peroxidase-like [Solanum lycopersicum]	sp|Q02200|PERX_NICSY;	Lignin-forming anionic peroxidase OS=Nicotiana sylvestris OX=4096 PE=2 SV=1;	PF00141.25	peroxidase	Peroxidase
gene_Solyc11g021060.2	Solyc11g021060.2	TOMARPIX proteinase inhibitor	497.03	612.21	865.39	1541.4	3187.56	1776.53	2282.27	1621.23	3995.92	8695.87	4273.8	10562.1	658.21	2168.5	2633.14	7843.91	GO:000486	MF:serine-type endopeptidase inhibitor activity;	------	------	------	------	------	------	NP_001234661.1	proteinase inhibitor type-2 TR8 precursor [Solanum lycopersicum]	sp|Q43710|IP22_SOLLC;	Proteinase inhibitor type-2 TR8 OS=Solanum lycopersicum OX=4081 GN=ARPI PE=2 SV=1;	PF02428.17	Prot_inhib_II	Potato type II proteinase inhibitor family
gene_Solyc11g022590.1	Solyc11g022590.1	trypsin inhibitor-like protein precursor	414.06	372.93	614.67	1488.65	2444.18	1860.2	2188.85	1960.69	3698.07	7376.47	4617.41	6404.22	467.22	1931.01	2615.87	6132.7	GO:000486	MF:endopeptidase inhibitor activity;	------	------	------	------	------	------	NP_001233769.1	Miraculin-like precursor [Solanum lycopersicum]	sp|P13087|MIRA_SYNDU;	Miraculin OS=Synsepalum dulcificum OX=3743 PE=1 SV=3;	PF00197.20	Kunitz_legume	Trypsin and protease inhibitor
gene_Solyc11g042880.3	Solyc11g042880.3	Late embryogenesis abundant protein (AHRD V3.3 *** A0A200QZY3_9MAGN)	0	0.21	2.84	0.25	1.69	0.61	1.04	0	2.4	9.55	10.57	12.43	1.01667	0.85	1.14667	10.85	GO:001602	CC:integral component of membrane;	------	------	------	------	ENOG410YEA4	S:Function unknown	XP_010313063.1	uncharacterized protein LOC101261986 [Solanum lycopersicum]	------	------	------	------	------
gene_Solyc11g056640.3	Solyc11g056640.3	inactive rhomboid protein (AHRD V3.3 *** AT5G12930.1)	1.26	1.67	3.42	1.87	2.87	1.9	2.47	1.48	2.91	3.54	7.31	5.72	2.11667	2.21333	2.28667	5.52333	------	------	------	------	------	------	ENOG410Z75W	S:Function unknown	XP_004250862.1	uncharacterized protein LOC101266789 isoform X1 [Solanum lycopersicum]	------	------	------	------	------
gene_Solyc11g065220.2	Solyc11g065220.2	Phosphotransferase (AHRD V3.3 *** A0A2G2YFN7_CAPAN)	3.43	4.66	5.28	4.21	5	3.94	4.64	5.31	5.65	9.34	10.56	10.9	4.45667	4.38333	5.2	10.2667	GO:0005975;GO:0019318;GO:0051156;GO:0001678;GO:0006096;GO:0016021;GO:0005829;GO:0005739;GO:0016773;GO:0008865;GO:0004340;GO:0019158;GO:0004396;GO:0005524;GO:000553	BP:carbohydrate metabolic process;BP:hexose metabolic process;BP:glucose 6-phosphate metabolic process;BP:cellular glucose homeostasis;BP:glycolytic process;CC:integral component of membrane;CC:cytosol;CC:mitochondrion;MF:phosphotransferase activity, alcohol group as acceptor;MF:fructokinase activity;MF:glucokinase activity;MF:mannokinase activity;MF:hexokinase activity;MF:ATP binding;MF:glucose …	K00844	HK	map01250;map00520;map00051;map00524;map00052;map00010;map00500	Biosynthesis of nucleotide sugars;Amino sugar and nucleotide sugar metabolism;Fructose and mannose metabolism;Neomycin, kanamycin and gentamicin biosynthesis;Galactose metabolism;Glycolysis / Gluconeogenesis;Starch and sucrose metabolism	COG5026	G:Carbohydrate transport and metabolism	XP_004251354.1	hexokinase-3-like [Solanum lycopersicum]	sp|Q9LPS1|HXK3_ARATH;	Hexokinase-3 OS=Arabidopsis thaliana OX=3702 GN=At1g50460 PE=1 SV=1;	PF03727.18;PF00349.23	Hexokinase_2;Hexokinase_1	Hexokinase;Hexokinase
gene_Solyc11g066130.1	Solyc11g066130.1	osmotin	103.35	82.48	157.86	84.61	152.16	66.93	74.82	33.29	121.55	211.38	573.81	352.57	114.563	101.233	76.5533	379.253	GO:0006952;GO:0005618;GO:000557	BP:defense response;CC:cell wall;CC:extracellular region;	------	------	------	------	ENOG410YFST	S:Function unknown	NP_001234714.1	osmotin-like protein precursor [Solanum lycopersicum]	sp|Q41350|OLP1_SOLLC;	Osmotin-like protein OS=Solanum lycopersicum OX=4081 PE=1 SV=1;	PF00314.19	Thaumatin	Thaumatin family
gene_Solyc11g069640.2	Solyc11g069640.2	Alpha carbonic anhydrase (AHRD V3.3 *** A0A200R5P3_9MAGN)	21.03	18.43	14.28	14.69	6.39	11.42	5.27	6.81	5.7	1.98	3.19	2.02	17.9133	10.8333	5.92667	2.39667	GO:0006342;GO:0006730;GO:0016021;GO:0005886;GO:0016836;GO:0008270;GO:0004672;GO:0004089;GO:000552	BP:chromatin silencing;BP:one-carbon metabolic process;CC:integral component of membrane;CC:plasma membrane;MF:hydro-lyase activity;MF:zinc ion binding;MF:protein kinase activity;MF:carbonate dehydratase activity;MF:ATP binding;	K01674	cah	map00910	Nitrogen metabolism	COG3338	P:Inorganic ion transport and metabolism	XP_004251153.1	alpha carbonic anhydrase 7 [Solanum lycopersicum]	sp|Q8L817|ATCA7_ARATH;	Alpha carbonic anhydrase 7 OS=Arabidopsis thaliana OX=3702 GN=ACA7 PE=2 SV=1;	PF00194.23	Carb_anhydrase	Eukaryotic-type carbonic anhydrase
gene_Solyc11g071470.1	Solyc11g071470.1	Transferase (AHRD V3.3 *** A0A200R9Q7_9MAGN)	0	0	0.07	0.52	0.69	0.12	0.27	0	0.6	3.12	4.85	5.2	0.023333	0.443333	0.29	4.39	GO:0009809;GO:0010252;GO:0009963;GO:0005829;GO:0016020;GO:0047172;GO:0016747;GO:004720	BP:lignin biosynthetic process;BP:auxin homeostasis;BP:positive regulation of flavonoid biosynthetic process;CC:cytosol;CC:membrane;MF:shikimate O-hydroxycinnamoyltransferase activity;MF:transferase activity, transferring acyl groups other than amino-acyl groups;MF:quinate O-hydroxycinnamoyltransferase activity;	K13065	E2.3.1.133, HCT	map00941;map00940;map00945	Flavonoid biosynthesis;Phenylpropanoid biosynthesis;Stilbenoid, diarylheptanoid and gingerol biosynthesis	ENOG410XTI7	S:Function unknown	XP_004251197.1	agmatine hydroxycinnamoyltransferase 1-like [Solanum lycopersicum]	sp|Q7XPK7|AHT1_ORYSJ;	Agmatine hydroxycinnamoyltransferase 1 OS=Oryza sativa subsp. japonica OX=39947 GN=AHT1 PE=1 SV=1;	PF02458.17	Transferase	Transferase family
gene_Solyc11g073010.1	Solyc11g073010.1	Exocyst subunit Exo70 family protein (AHRD V3.3 *** A0A2G2VNA4_CAPBA)	1.79	1.89	2.33	1.75	1.72	1.31	1.65	0.8	1.59	3.63	3.17	4.36	2.00333	1.59333	1.34667	3.72	GO:0015031;GO:0006887;GO:000014	BP:protein transport;BP:exocytosis;CC:exocyst;	K07195	EXOC7, EXO70	------	------	ENOG410YIGI	S:Function unknown	XP_004251304.1	exocyst complex component EXO70H1 [Solanum lycopersicum]	sp|Q8VY27|E70H1_ARATH;	Exocyst complex component EXO70H1 OS=Arabidopsis thaliana OX=3702 GN=EXO70H1 PE=1 SV=1;	PF03081.17	Exo70	Exo70 exocyst complex subunit
gene_Solyc12g005940.2	Solyc12g005940.2	1-aminocyclopropane-1-carboxylate oxidase 2 (AHRD V3.3 *** Q7Y257_BETPN)	3.12	2.36	3.09	2.99	5.35	5.91	4.6	4.84	4.69	12.1	6.25	11.22	2.85667	4.75	4.71	9.85667	GO:0009835;GO:0009693;GO:0055114;GO:0031418;GO:0051213;GO:0009815;GO:0046872;GO:001649	BP:fruit ripening;BP:ethylene biosynthetic process;BP:oxidation-reduction process;MF:L-ascorbic acid binding;MF:dioxygenase activity;MF:1-aminocyclopropane-1-carboxylate oxidase activity;MF:metal ion binding;MF:oxidoreductase activity;	K05933	E1.14.17.4	map00270	Cysteine and methionine metabolism	COG3491	S:Function unknown	NP_001316842.1	1-aminocyclopropane-1-carboxylate oxidase 2 [Solanum lycopersicum]	sp|P07920|ACCO2_SOLLC;	1-aminocyclopropane-1-carboxylate oxidase 2 OS=Solanum lycopersicum OX=4081 GN=ACO2 PE=2 SV=1;	PF03171.22;PF14226.8	2OG-FeII_Oxy;DIOX_N	2OG-F;non-haem dioxygenase in morphine synthesis N-terminal
gene_Solyc12g006260.1	Solyc12g006260.1	Glycine rich protein-interacting protein (AHRD V3.3 *** Q4U602_TOBAC)	85.13	146.5	105.64	164.69	145.66	202.34	36.66	41.7	30.04	14.52	18.25	15.17	112.423	170.897	36.1333	15.98	------	------	------	------	------	------	------	------	TMW82109.1	hypothetical protein EJD97_006804 [Solanum chilense]	------	------	------	------	------
gene_Solyc12g006840.2	Solyc12g006840.2	Lectin protein kinase family protein (AHRD V3.3 *** A0A1I9LPL5_ARATH)	3.99	3.68	2.96	10.32	4.07	7.1	6.96	10.3	2.64	1.24	1.75	0.29	3.54333	7.16333	6.63333	1.09333	GO:0006468;GO:0046777;GO:0106311;GO:0106310;GO:0016021;GO:0005886;GO:0004672;GO:0030246;GO:0004674;GO:000552	BP:protein phosphorylation;BP:protein autophosphorylation;BP:old GO;BP:old GO;CC:integral component of membrane;CC:plasma membrane;MF:protein kinase activity;MF:carbohydrate binding;MF:protein serine/threonine kinase activity;MF:ATP binding;	------	------	------	------	COG0515	T:Signal transduction mechanisms	XP_010314054.2	G-type lectin S-receptor-like serine/threonine-protein kinase CES101 [Solanum lycopersicum]	sp|Q9LW83|CE101_ARATH;	G-type lectin S-receptor-like serine/threonine-protein kinase CES101 OS=Arabidopsis thaliana OX=3702 GN=CES101 PE=2 SV=2;	PF07714.19;PF00069.27;PF01453.26;PF08276.13;PF03109.18	PK_Tyr_Ser-Thr;Pkinase;B_lectin;PAN_2;ABC1	Protein tyrosine and serine/threonine kinase;Protein kinase domain;D-mannose binding lectin;PAN-like domain;ABC1 atypical kinase-like domain
gene_Solyc12g006860.2	Solyc12g006860.2	brassinosteroid hydroxylase	1.48	1.56	1.31	1.19	0.81	1.04	0.77	0.73	1.22	1.82	2.82	2.43	1.45	1.01333	0.906667	2.35667	GO:0010268;GO:0016131;GO:0009741;GO:0055114;GO:0016021;GO:0004497;GO:0020037;GO:0016705;GO:0005506;GO:000839	BP:brassinosteroid homeostasis;BP:brassinosteroid metabolic process;BP:response to brassinosteroid;BP:oxidation-reduction process;CC:integral component of membrane;MF:monooxygenase activity;MF:heme binding;MF:oxidoreductase activity, acting on paired donors, with incorporation or reduction of molecular oxygen;MF:iron ion binding;MF:steroid hydroxylase activity;	K15639	CYP734A1, BAS1	map00905	Brassinosteroid biosynthesis	COG2124	Q:Secondary metabolites biosynthesis, transport and catabolism	NP_001234737.2	putative brassinosteroid hydroxylase [Solanum lycopersicum]	sp|O48786|C734A_ARATH;	Cytochrome P450 734A1 OS=Arabidopsis thaliana OX=3702 GN=CYP734A1 PE=2 SV=1;	PF00067.24	p450	Cytochrome P450
gene_Solyc12g009770.2	Solyc12g009770.2	Unknown protein	9.09	6.8	6.16	19.93	5.03	10.61	14.93	20.64	4.8	2.15	2.1	1.17	7.35	11.8567	13.4567	1.80667	GO:0016021;GO:000588	CC:integral component of membrane;CC:plasma membrane;	------	------	------	------	COG4886	S:Function unknown	XP_010313803.1	receptor-like protein 43 [Solanum lycopersicum]	sp|Q9C637|RLP6_ARATH;	Receptor-like protein 6 OS=Arabidopsis thaliana OX=3702 GN=RLP6 PE=3 SV=1;	------	------	------
gene_Solyc12g009780.1	Solyc12g009780.1	receptor-like protein 12 (AHRD V3.3 *** A0A1S3Y203_TOBAC)	0.57	0.69	1.14	2.1	0.54	0.94	1.65	2.69	0.75	0.29	0.3	0.31	0.8	1.19333	1.69667	0.3	GO:0016021;GO:0005886;GO:000551	CC:integral component of membrane;CC:plasma membrane;MF:protein binding;	------	------	------	------	COG4886	S:Function unknown	XP_010313802.1	receptor-like protein 6 [Solanum lycopersicum]	sp|Q9C637|RLP6_ARATH;	Receptor-like protein 6 OS=Arabidopsis thaliana OX=3702 GN=RLP6 PE=3 SV=1;	PF13855.8;PF12799.9;PF08263.14	LRR_8;LRR_4;LRRNT_2	Leucine rich repeat;Leucine Rich repeats;Leucine rich repeat N-terminal domain
gene_Solyc12g009880.1	Solyc12g009880.1	Serine-rich protein (AHRD V3.3 *** E5GCC5_CUCME)	39.71	52.27	50.23	51.47	34.39	56.52	37.43	32.81	31.43	10.97	17.11	13.85	47.4033	47.46	33.89	13.9767	------	------	------	------	------	------	ENOG410YKIU	S:Function unknown	XP_004251739.1	uncharacterized protein LOC101264293 [Solanum lycopersicum]	------	------	------	------	------
gene_Solyc12g010030.3	Solyc12g010030.3	Leucine aminopeptidase, chloroplastic (AHRD V3.3 *** AMPL_SOLTU)	39.66	13.5	8.45	35.3	139.1	30.44	22.92	15.93	94.23	694.88	470.24	1007.16	20.5367	68.28	44.36	724.093	GO:0034214;GO:0006508;GO:0005737;GO:0005622;GO:0009507;GO:0004177;GO:0000287;GO:0030145;GO:007000	BP:protein hexamerization;BP:proteolysis;CC:cytoplasm;CC:intracellular;CC:chloroplast;MF:aminopeptidase activity;MF:magnesium ion binding;MF:manganese ion binding;MF:metalloaminopeptidase activity;	K01255	CARP, pepA	map00480	Glutathione metabolism	COG0260	E:Amino acid transport and metabolism	AAC49457.1	leucine aminopeptidase, partial [Solanum lycopersicum]	sp|Q10712|AMPL1_SOLLC;	Leucine aminopeptidase 1, chloroplastic OS=Solanum lycopersicum OX=4081 GN=LAPA1 PE=1 SV=2;	PF00883.23	Peptidase_M17	Cytosol aminopeptidase family, catalytic domain
gene_Solyc12g011150.1	Solyc12g011150.1	Unknown protein	26.24	7.26	22.85	42.54	11.18	35.46	17.74	38.54	6.13	3.05	3.16	2.94	18.7833	29.7267	20.8033	3.05	------	------	------	------	------	------	ENOG410Z1J1;ENOG410ZCT8	S:Function unknown;	XP_004252097.2	uncharacterized protein LOC101254173 [Solanum lycopersicum]	------	------	------	------	------
gene_Solyc12g013700.2	Solyc12g013700.2	stem-specific protein TSJT1-like (AHRD V3.3 *** A0A2I4H4H1_9ROSI)	0.48	2.85	9.58	3.99	12.76	4.13	5.07	1.92	8.56	15.5	91.05	32.54	4.30333	6.96	5.18333	46.3633	------	------	------	------	------	------	ENOG410YD56	S:Function unknown	XP_004251851.1	stem-specific protein TSJT1 [Solanum lycopersicum]	sp|P24805|TSJT1_TOBAC;	Stem-specific protein TSJT1 OS=Nicotiana tabacum OX=4097 GN=TSJT1 PE=2 SV=1;	PF12481.10;PF13537.8	DUF3700;GATase_7	Aluminium induced protein;Glutamine amidotransferase domain
gene_Solyc12g014010.2	Solyc12g014010.2	Glycosyltransferase (AHRD V3.3 *** Q94IF2_TOBAC)	13.58	17	12.62	11.81	6.19	11.19	9.48	11.53	8.82	4.47	6.87	2.87	14.4	9.73	9.94333	4.73667	GO:0016758;GO:000819	MF:transferase activity, transferring hexosyl groups;MF:UDP-glycosyltransferase activity;	------	------	------	------	COG1819	S:Function unknown	XP_004251871.1	UDP-glucose flavonoid 3-O-glucosyltransferase 6 [Solanum lycopersicum]	sp|Q2V6K0|UFOG6_FRAAN;	UDP-glucose flavonoid 3-O-glucosyltransferase 6 OS=Fragaria ananassa OX=3747 GN=GT6 PE=1 SV=1;	PF00201.20	UDPGT	UDP-glucoronosyl and UDP-glucosyl transferase
gene_Solyc12g036390.2	Solyc12g036390.2	Calmodulin binding protein-like (AHRD V3.3 *** A0A200Q136_9MAGN)	12.72	11.02	8.39	7.37	5.2	4.52	7.39	14.46	6.03	3.24	2.28	1.97	10.71	5.69667	9.29333	2.49667	GO:0080142;GO:0005634;GO:0003700;GO:0043565;GO:000551	BP:regulation of salicylic acid biosynthetic process;CC:nucleus;MF:transcription factor activity, sequence-specific DNA binding;MF:sequence-specific DNA binding;MF:calmodulin binding;	------	------	------	------	ENOG410Y9AX	S:Function unknown	XP_004252230.1	protein SAR DEFICIENT 1-like [Solanum lycopersicum]	sp|Q9C9T2|SARD1_ARATH;	Protein SAR DEFICIENT 1 OS=Arabidopsis thaliana OX=3702 GN=SARD1 PE=1 SV=1;	PF07887.13	Calmodulin_bind	Calmodulin binding protein-like
gene_Solyc12g039070.2	Solyc12g039070.2	Strictosidine synthase family protein (AHRD V3.3 *** D7LVM7_ARALL)	9.71	8.51	13.98	12.29	19.09	28.15	21.91	6.54	21.15	48.04	31.09	55.63	10.7333	19.8433	16.5333	44.92	GO:0009058;GO:0005773;GO:001684	BP:biosynthetic process;CC:vacuole;MF:strictosidine synthase activity;	------	------	------	------	COG3386	G:Carbohydrate transport and metabolism	XP_004252261.1	protein STRICTOSIDINE SYNTHASE-LIKE 11-like [Solanum lycopersicum]	sp|P92976|SSL11_ARATH;	Protein STRICTOSIDINE SYNTHASE-LIKE 11 OS=Arabidopsis thaliana OX=3702 GN=SSL11 PE=2 SV=2;	PF03088.18;PF08450.14;PF20067.1	Str_synth;SGL;APMAP_N	Strictosidine synthase;SMP-30/Gluconolactonase/LRE-like region;Adipocyte plasma membrane-associated protein-like, N-terminal
gene_Solyc12g042240.2	Solyc12g042240.2	Major facilitator superfamily protein (AHRD V3.3 *-* F4IPF3_ARATH)	0	0	0	0	0	0	0	0	0	5.8	2.25	2.47	0	0	0	3.50667	GO:0006857;GO:0006817;GO:0055085;GO:0016021;GO:0016020;GO:0009705;GO:002285	BP:oligopeptide transport;BP:phosphate ion transport;BP:transmembrane transport;CC:integral component of membrane;CC:membrane;CC:plant-type vacuole membrane;MF:transmembrane transporter activity;	K14638	SLC15A3_4, PHT	------	------	COG3104	E:Amino acid transport and metabolism	TMW84129.1	hypothetical protein EJD97_025745 [Solanum chilense]	sp|P46032|PTR2_ARATH;	Protein NRT1/ PTR FAMILY 8.3 OS=Arabidopsis thaliana OX=3702 GN=NPF8.3 PE=1 SV=1;	PF00854.23	PTR2	POT family
gene_Solyc12g042250.3	Solyc12g042250.3	Major facilitator superfamily protein (AHRD V3.3 *-* A0A1P8AP16_ARATH)	0	0	0	0	0	0	0	0	0	1.95	0.44	1.2	0	0	0	1.19667	GO:0006857;GO:0006817;GO:0055085;GO:0016021;GO:0016020;GO:0009705;GO:002285	BP:oligopeptide transport;BP:phosphate ion transport;BP:transmembrane transport;CC:integral component of membrane;CC:membrane;CC:plant-type vacuole membrane;MF:transmembrane transporter activity;	K14638	SLC15A3_4, PHT	------	------	COG3104	E:Amino acid transport and metabolism	TMW84129.1	hypothetical protein EJD97_025745 [Solanum chilense]	sp|P46032|PTR2_ARATH;	Protein NRT1/ PTR FAMILY 8.3 OS=Arabidopsis thaliana OX=3702 GN=NPF8.3 PE=1 SV=1;	PF00854.23	PTR2	POT family
gene_Solyc12g042793.1	Solyc12g042793.1	coiled-coil domain-containing protein 18 (AHRD V3.3 *-* XP_010325663.1)	0.01	0	0.24	0.49	0	0.19	0.14	0.32	0.7	5.84	1.78	3.08	0.083333	0.226667	0.386667	3.56667	GO:0004674;GO:000552	MF:protein serine/threonine kinase activity;MF:ATP binding;	------	------	------	------	COG0515	T:Signal transduction mechanisms	KAG5629613.1	hypothetical protein H5410_001330 [Solanum commersonii]	------	------	------	------	------
gene_Solyc12g044320.2	Solyc12g044320.2	Transducin/WD40 repeat-like superfamily protein (AHRD V3.3 *** A0A2U1MAA7_ARTAN)	0.62	0.84	1.86	0.68	0.71	0.29	1.41	0.51	1.56	2.21	3.97	3.75	1.10667	0.56	1.16	3.31	GO:0032259;GO:0008168;GO:000551	BP:methylation;MF:methyltransferase activity;MF:protein binding;	------	------	------	------	ENOG410XP1Z;ENOG4111FMP	S:Function unknown;	XP_004252499.1	protein JINGUBANG-like [Solanum lycopersicum]	sp|O48716|JGB_ARATH;	Protein JINGUBANG OS=Arabidopsis thaliana OX=3702 GN=JGB PE=1 SV=1;	PF00400.34;PF11715.10	WD40;Nup160	WD domain, G-beta repeat;Nucleoporin Nup120/160
gene_Solyc12g044440.2	Solyc12g044440.2	Zinc finger protein (AHRD V3.3 *-* A0A200QX85_9MAGN)	0	0	0	0	0	0	0	0	0	3.32	1.7	1.47	0	0	0	2.16333	------	------	------	------	------	------	ENOG410YMTV	S:Function unknown	XP_025884362.1	uncharacterized protein LOC101247991 isoform X4 [Solanum lycopersicum]	------	------	------	------	------
gene_Solyc12g088010.2	Solyc12g088010.2	HYPERSENSITIVE TO PI STARVATION 4 (AHRD V3.3 *** F4I9T6_ARATH)	0.01	0.04	0.05	0.08	0.13	0.08	0.06	0.06	0.03	0.2	0.54	0.31	0.033333	0.096667	0.05	0.35	GO:001602	CC:integral component of membrane;	------	------	------	------	ENOG410XQTK	S:Function unknown	XP_019066825.1	protein SABRE-like isoform X1 [Solanum lycopersicum]	sp|Q6IMT1|SAB_ARATH;	Protein SABRE OS=Arabidopsis thaliana OX=3702 GN=SAB PE=1 SV=1;	PF10351.11;PF10347.11	Apt1;Fmp27_GFWDK	Golgi-body localisation protein domain;RNA pol II promoter Fmp27 protein domain
gene_Solyc12g089220.3	Solyc12g089220.3	Bifunctional nuclease 2 (AHRD V3.3 *** A0A2G2Y9Z2_CAPAN)	90.84	120.6	80.39	177.23	113.32	221.87	133	189.64	122.23	74.06	69.23	45.59	97.2767	170.807	148.29	62.96	GO:0016567;GO:0005634;GO:0030891;GO:000451	BP:protein ubiquitination;CC:nucleus;CC:VCB complex;MF:nuclease activity;	------	------	------	------	ENOG4110AP6	S:Function unknown	XP_004252794.2	bifunctional nuclease 1 [Solanum lycopersicum]	sp|Q9FWS6|BBD1_ARATH;	Bifunctional nuclease 1 OS=Arabidopsis thaliana OX=3702 GN=BBD1 PE=2 SV=1;	PF02577.16	DUF151	Domain of unknown function
gene_Solyc12g095870.3	Solyc12g095870.3	Aurora kinase A-A (AHRD V3.3 *** A0A1U8F0D3_CAPAN)	2.84	2.78	4.6	0.97	2.59	1.33	2.51	1.3	2.01	3.51	4.08	3.88	3.40667	1.63	1.94	3.82333	GO:0006468;GO:0007052;GO:0032465;GO:0051233;GO:0005876;GO:0032133;GO:0106311;GO:0106310;GO:0035174;GO:0005524;GO:000467	BP:protein phosphorylation;BP:mitotic spindle organization;BP:regulation of cytokinesis;CC:spindle midzone;CC:spindle microtubule;CC:chromosome passenger complex;CC:old GO;CC:old GO;MF:histone serine kinase activity;MF:ATP binding;MF:protein kinase activity;	K08850	AURKX	------	------	ENOG410XNRB	T:Signal transduction mechanisms	XP_004253103.1	serine/threonine-protein kinase Aurora-2 [Solanum lycopersicum]	sp|Q9M077|AUR1_ARATH;	Serine/threonine-protein kinase Aurora-1 OS=Arabidopsis thaliana OX=3702 GN=AUR1 PE=1 SV=1;	PF00069.27;PF07714.19;PF03109.18;PF14531.8	Pkinase;PK_Tyr_Ser-Thr;ABC1;Kinase-like	Protein kinase domain;Protein tyrosine and serine/threonine kinase;ABC1 atypical kinase-like domain;Kinase-like
gene_Solyc12g096890.1	Solyc12g096890.1	F-box protein (AHRD V3.3 *-* A0A2G3B4N2_CAPCH)	2.52	2.31	0.58	5.76	6.46	6.98	5.25	6.85	3.57	1.08	2.92	1.52	1.80333	6.4	5.22333	1.84	GO:000716	BP:signal transduction;	------	------	------	------	ENOG4111C7T;ENOG410YD6D	O:Posttranslational modification, protein turnover, chaperones;S:Function unknown	XP_004253177.1	protein PHLOEM PROTEIN 2-LIKE A5 [Solanum lycopersicum]	sp|Q9ZVQ6|P2B10_ARATH;	F-box protein PP2-B10 OS=Arabidopsis thaliana OX=3702 GN=PP2B10 PE=1 SV=1;	PF14299.8	PP2	Phloem protein 2
gene_Solyc12g098630.2	Solyc12g098630.2	Kinesin-like protein KIN12B (AHRD V3.3 *** A0A2G3B535_CAPCH)	1.71	2.28	2.82	1.61	3.04	1.54	2.55	1.33	2.39	2.91	5.24	5.38	2.27	2.06333	2.09	4.51	GO:0007018;GO:0005874;GO:0005871;GO:0008574;GO:0008017;GO:0003777;GO:0016887;GO:1990939;GO:000552	BP:microtubule-based movement;CC:microtubule;CC:kinesin complex;MF:ATP-dependent microtubule motor activity, plus-end-directed;MF:microtubule binding;MF:microtubule motor activity;MF:ATPase activity;MF:ATP-dependent microtubule motor activity;MF:ATP binding;	K10400	KIF15	------	------	COG5059	Z:Cytoskeleton	XP_010314743.1	kinesin-like protein KIN-12B [Solanum lycopersicum]	sp|Q8L7Y8|KN12B_ARATH;	Kinesin-like protein KIN-12B OS=Arabidopsis thaliana OX=3702 GN=KIN12B PE=1 SV=1;	PF00225.25;PF16796.7	Kinesin;Microtub_bd	Kinesin motor domain;Microtubule binding

## Sheet: 381 DEGs
Supplementary Dataset 4. Common DEGs in in Cd+Pb vs. Pb group and Cd+Pb vs. Cd group of tomato seedlings.
Gene_id	Gene_name	Gene_description	Control_1	Control_2	Control_3	Cd_1	Cd_2	Cd_3	Pb_1	Pb_2	Pb_3	Cd+Pb_1	Cd+Pb_2	Cd+Pb_3	Control	Cd	Pb	Cd+Pb	GO_id	GO_term	KO_id	KO_name	Pathway_id	Pathway_definition	COG_id	COG_Functional Categories	NR_hit-name	NR_description	Swiss-Prot_hit-name	Swiss-Prot_description	Pfam_id	Domain	Domain description
gene_Solyc01g005040.3	Solyc01g005040.3	CASP-like protein (AHRD V3.3 *** A0A2G3CF58_CAPCH)	2.36	2.75	1.72	17.85	8.77	11.06	6.65	8.54	3.78	2.55	2.99	1.33	2.27667	12.56	6.32333	2.29	GO:0016021;GO:000588	CC:integral component of membrane;CC:plasma membrane;	------	------	------	------	ENOG410ZDYN	S:Function unknown	XP_004228943.1	CASP-like protein PIMP1 [Solanum lycopersicum]	sp|A1XGB4|PIMP1_CAPAN;	CASP-like protein PIMP1 OS=Capsicum annuum OX=4072 GN=PIMP1 PE=2 SV=1;	PF04535.14	DUF588	Domain of unknown function
gene_Solyc01g005730.3	Solyc01g005730.3	NL0C (AHRD V3.3 *** Q9ZS83_SOLLC)	4.51	2.75	2.65	3.3	2.09	3.57	4.04	3.58	2.44	6.51	3.6	3.89	3.30333	2.98667	3.35333	4.66667	GO:0016021;GO:0005886;GO:000551	CC:integral component of membrane;CC:plasma membrane;MF:protein binding;	------	------	------	------	COG4886	S:Function unknown	XP_025884867.1	receptor-like protein Cf-9 [Solanum lycopersicum]	sp|Q5MR23|9DC3_SOLPI;	Receptor-like protein 9DC3 OS=Solanum pimpinellifolium OX=4084 GN=9DC3 PE=3 SV=1;	PF13855.8;PF12799.9;PF00560.35;PF08263.14	LRR_8;LRR_4;LRR_1;LRRNT_2	Leucine rich repeat;Leucine Rich repeats;Leucine Rich Repeat;Leucine rich repeat N-terminal domain
gene_Solyc01g006950.3	Solyc01g006950.3	syntaxin-121-like (AHRD V3.3 *** A0A2I4H4W7_9ROSI)	3.43	2.94	2.24	9.27	4.68	4.81	9.75	11.43	5.41	3.28	3.26	1.72	2.87	6.25333	8.86333	2.75333	GO:0006887;GO:0016192;GO:0006906;GO:0048278;GO:0006886;GO:0016020;GO:0016021;GO:0031201;GO:0012505;GO:0005886;GO:0000149;GO:000548	BP:exocytosis;BP:vesicle-mediated transport;BP:vesicle fusion;BP:vesicle docking;BP:intracellular protein transport;CC:membrane;CC:integral component of membrane;CC:SNARE complex;CC:endomembrane system;CC:plasma membrane;MF:SNARE binding;MF:SNAP receptor activity;	K08486	STX1B_2_3	map04130	SNARE interactions in vesicular transport	COG5074	U:Intracellular trafficking, secretion, and vesicular transport	XP_004228675.1	syntaxin-121 [Solanum lycopersicum]	sp|Q9ZSD4|SY121_ARATH;	Syntaxin-121 OS=Arabidopsis thaliana OX=3702 GN=SYP121 PE=1 SV=1;	PF00804.27;PF05739.21	Syntaxin;SNARE	Syntaxin;SNARE domain
gene_Solyc01g007030.3	Solyc01g007030.3	RING-type E3 ubiquitin transferase (AHRD V3.3 *** Q3HLY8_CAPAN)	2.25	1.98	0.99	3.68	5.79	0.67	4.23	4.13	5.12	13.99	8.63	11.41	1.74	3.38	4.49333	11.3433	GO:000484	MF:ubiquitin-protein transferase activity;	------	------	------	------	ENOG410YC1Z	O:Posttranslational modification, protein turnover, chaperones	XP_010315681.1	LOW QUALITY PROTEIN: E3 ubiquitin-protein ligase PUB22-like [Solanum lycopersicum]	sp|Q9SVC6|PUB22_ARATH;	E3 ubiquitin-protein ligase PUB22 OS=Arabidopsis thaliana OX=3702 GN=PUB22 PE=1 SV=1;	------	------	------
gene_Solyc01g008500.4	Solyc01g008500.4	Receptor-like protein kinase (AHRD V3.3 *** A0A2K3L8M9_TRIPR)	6.12	4.62	3.98	14.26	6.55	10.47	11.21	17.28	4.81	4.2	4.06	2.58	4.90667	10.4267	11.1	3.61333	GO:0006468;GO:0016021;GO:0030247;GO:0005524;GO:000467	BP:protein phosphorylation;CC:integral component of membrane;MF:polysaccharide binding;MF:ATP binding;MF:protein kinase activity;	------	------	------	------	COG0515	T:Signal transduction mechanisms	XP_010315122.1	rust resistance kinase Lr10-like [Solanum lycopersicum]	sp|P93604|LRK10_WHEAT;	Rust resistance kinase Lr10 OS=Triticum aestivum OX=4565 GN=LRK10 PE=2 SV=1;	PF00069.27;PF07714.19	Pkinase;PK_Tyr_Ser-Thr	Protein kinase domain;Protein tyrosine and serine/threonine kinase
gene_Solyc01g008600.5	Solyc01g008600.5	Zinc finger CCCH domain-containing protein 55 (AHRD V3.11 *** tr|A0A2G3DF68|A0A2G3DF68_CAPCH)	7.38	9.82	24.74	6.94	14.31	4.66	11.62	4.56	15.19	15.58	51.02	31.36	13.98	8.63667	10.4567	32.6533	GO:0046872;GO:0003723;GO:000367	MF:metal ion binding;MF:RNA binding;MF:DNA binding;	------	------	------	------	ENOG411182H	S:Function unknown	XP_004228513.1	zinc finger CCCH domain-containing protein 46-like isoform X2 [Solanum lycopersicum]	sp|Q0D3J9|C3H53_ORYSJ;	Zinc finger CCCH domain-containing protein 53 OS=Oryza sativa subsp. japonica OX=39947 GN=Os07g0682400 PE=2 SV=1;	PF00642.26;PF00076.24;PF16131.7	zf-CCCH;RRM_1;Torus	Zinc finger C-x8-C-x5-C-x3-H type;RNA recognition motif.;Torus domain
gene_Solyc01g008620.5	Solyc01g008620.5	Glucan endo-1,3-beta-glucosidase (AHRD V3.11 *** tr|A0A1U8FGD7|A0A1U8FGD7_CAPAN)	38.18	22.76	19.41	44.07	10.84	40.15	19.66	35.33	9.73	9.49	7.21	4.95	26.7833	31.6867	21.5733	7.21667	GO:0005975;GO:0006952;GO:0005615;GO:0046658;GO:0004553;GO:004297	BP:carbohydrate metabolic process;BP:defense response;CC:extracellular space;CC:anchored component of plasma membrane;MF:hydrolase activity, hydrolyzing O-glycosyl compounds;MF:glucan endo-1,3-beta-D-glucosidase activity;	------	------	------	------	ENOG410YAHP;ENOG410YARB	G:Carbohydrate transport and metabolism;S:Function unknown	NP_001234798.2	glucan endo-1,3-beta-glucosidase A precursor [Solanum lycopersicum]	sp|Q01412|E13A_SOLLC;	Glucan endo-1,3-beta-glucosidase A OS=Solanum lycopersicum OX=4081 PE=1 SV=1;	PF00332.20	Glyco_hydro_17	Glycosyl hydrolases family 17
gene_Solyc01g008940.2	Solyc01g008940.2	Unknown protein	26.88	25.54	18.15	21.65	19.03	35.32	26.27	32.72	20.72	10.22	10.76	8.23	23.5233	25.3333	26.57	9.73667	------	------	------	------	------	------	------	------	KAG5629088.1	hypothetical protein H5410_000805 [Solanum commersonii]	------	------	------	------	------
gene_Solyc01g009340.5	Solyc01g009340.5	Protein IQ-domain 14-like (AHRD V3.11 *** tr|A0A2K3PR21|A0A2K3PR21_TRIPR)	8.12	7.6	10.86	4.83	8.52	5.71	6.48	4.09	8.21	8.43	16.08	15.84	8.86	6.35333	6.26	13.45	GO:000551	MF:calmodulin binding;	------	------	------	------	------	------	XP_010327634.1	protein IQ-DOMAIN 14-like [Solanum lycopersicum]	sp|F4JHN2|IQD17_ARATH;	Protein IQ-DOMAIN 17 OS=Arabidopsis thaliana OX=3702 GN=IQD17 PE=1 SV=1;	PF13178.8;PF00612.29	DUF4005;IQ	Protein of unknown function;IQ calmodulin-binding motif
gene_Solyc01g009690.3	Solyc01g009690.3	SC0A (AHRD V3.3 *** Q9ZS79_SOLLC)	4.65	3.47	4.22	7.41	1.81	4.92	5.22	11.41	2.99	1.26	1.98	0.73	4.11333	4.71333	6.54	1.32333	GO:0016021;GO:0005886;GO:000551	CC:integral component of membrane;CC:plasma membrane;MF:protein binding;	------	------	------	------	COG4886	S:Function unknown	XP_004228442.1	receptor-like protein Cf-9 homolog isoform X1 [Solanum lycopersicum]	sp|O49879|CF0_SOLLC;	Receptor-like protein Cf-9 homolog OS=Solanum lycopersicum OX=4081 GN=HCR9-0 PE=2 SV=2;	PF13855.8;PF12799.9;PF00560.35;PF08263.14	LRR_8;LRR_4;LRR_1;LRRNT_2	Leucine rich repeat;Leucine Rich repeats;Leucine Rich Repeat;Leucine rich repeat N-terminal domain
gene_Solyc01g009700.3	Solyc01g009700.3	NL0E (AHRD V3.3 *** Q9ZS81_SOLLC)	5.59	3.96	3.43	8.54	2.56	5.2	6.83	12.78	4.45	2.63	2.53	1.11	4.32667	5.43333	8.02	2.09	GO:0016021;GO:0005886;GO:000551	CC:integral component of membrane;CC:plasma membrane;MF:protein binding;	------	------	------	------	COG4886	S:Function unknown	CAA05272.1	Hcr9-9A [Solanum pimpinellifolium]	sp|Q40235|CF9_SOLPI;	Receptor-like protein Cf-9 OS=Solanum pimpinellifolium OX=4084 GN=CF-9 PE=1 SV=1;	PF13855.8;PF12799.9;PF00560.35;PF08263.14	LRR_8;LRR_4;LRR_1;LRRNT_2	Leucine rich repeat;Leucine Rich repeats;Leucine Rich Repeat;Leucine rich repeat N-terminal domain
gene_Solyc01g009860.3	Solyc01g009860.3	NAC domain-containing protein (AHRD V3.3 *** A0A2K3LZ45_TRIPR)	138.11	165.39	168.51	262.44	130.58	229.85	165.92	231.1	152.78	98.09	74.04	68.51	157.337	207.623	183.267	80.2133	GO:0010150;GO:0009737;GO:0010089;GO:0006355;GO:0045892;GO:0009651;GO:000367	BP:leaf senescence;BP:response to abscisic acid;BP:xylem development;BP:regulation of transcription, DNA-templated;BP:negative regulation of transcription, DNA-templated;BP:response to salt stress;MF:DNA binding;	------	------	------	------	ENOG410YED8	K:Transcription	NP_001233811.1	uncharacterized protein LOC100147720 [Solanum lycopersicum]	sp|Q9FY93|NAC83_ARATH;	NAC domain-containing protein 83 OS=Arabidopsis thaliana OX=3702 GN=NAC083 PE=1 SV=1;	PF02365.17	NAM	No apical meristem
gene_Solyc01g057320.3	Solyc01g057320.3	Kinesin (AHRD V3.3 *-* A0A200QSU4_9MAGN)	1.07	1.32	1.46	1.04	1.66	1.06	1.25	0.64	1.42	1.77	3.73	2.79	1.28333	1.25333	1.10333	2.76333	GO:0007018;GO:0005874;GO:0008574;GO:1990939;GO:0008017;GO:0003777;GO:000552	BP:microtubule-based movement;CC:microtubule;MF:ATP-dependent microtubule motor activity, plus-end-directed;MF:ATP-dependent microtubule motor activity;MF:microtubule binding;MF:microtubule motor activity;MF:ATP binding;	K10400	KIF15	------	------	COG5059	Z:Cytoskeleton	XP_004229119.1	kinesin-like protein KIN-12C isoform X1 [Solanum lycopersicum]	sp|Q27IK7|KN12C_ARATH;	Kinesin-like protein KIN-12C OS=Arabidopsis thaliana OX=3702 GN=KIN12C PE=1 SV=1;	PF00225.25;PF16796.7	Kinesin;Microtub_bd	Kinesin motor domain;Microtubule binding
gene_Solyc01g067020.4	Solyc01g067020.4	Atypical receptor-like kinase.1	8.79	8.06	8.24	29.77	11.34	20.89	19.62	31.78	11.32	7.1	6.84	2.85	8.36333	20.6667	20.9067	5.59667	GO:0006468;GO:0016021;GO:0005524;GO:000467	BP:protein phosphorylation;CC:integral component of membrane;MF:ATP binding;MF:protein kinase activity;	------	------	------	------	ENOG410Y9HF	T:Signal transduction mechanisms	NP_001234580.2	atypical receptor-like kinase 1 precursor [Solanum lycopersicum]	sp|Q9LP77|Y1848_ARATH;	Probable inactive receptor kinase At1g48480 OS=Arabidopsis thaliana OX=3702 GN=RKL1 PE=1 SV=1;	PF00069.27;PF07714.19;PF13855.8;PF08263.14;PF12799.9	Pkinase;PK_Tyr_Ser-Thr;LRR_8;LRRNT_2;LRR_4	Protein kinase domain;Protein tyrosine and serine/threonine kinase;Leucine rich repeat;Leucine rich repeat N-terminal domain;Leucine Rich repeats
gene_Solyc01g068380.3	Solyc01g068380.3	Purple acid phosphatase (AHRD V3.3 *** A0A2G2XQL8_CAPBA)	9.48	6.49	7.77	18.2	6.98	13.36	10.53	13.49	11.07	6.23	5.27	4.06	7.91333	12.8467	11.6967	5.18667	GO:0016021;GO:0016787;GO:0046872;GO:000399	CC:integral component of membrane;MF:hydrolase activity;MF:metal ion binding;MF:acid phosphatase activity;	K22390	ACP7	------	------	COG1409	S:Function unknown	XP_004229163.2	nucleotide pyrophosphatase/phosphodiesterase-like [Solanum lycopersicum]	sp|Q5MAU8|PPA27_ARATH;	Probable inactive purple acid phosphatase 27 OS=Arabidopsis thaliana OX=3702 GN=PAP27 PE=2 SV=1;	PF17808.3;PF00149.30;PF16656.7;PF14008.8	fn3_PAP;Metallophos;Pur_ac_phosph_N;Metallophos_C	Fn3-like domain from Purple Acid Phosphatase;Calcineurin-like phosphoesterase;Purple acid Phosphatase, N-terminal domain;Iron/zinc purple acid phosphatase-like protein C
gene_Solyc01g073970.3	Solyc01g073970.3	Histone H3 (AHRD V3.3 *** B3TM40_ELAGV)	0	0	0	0	0	0	0	0	0.17	0.87	1.01	2.81	0	0	0.056667	1.56333	GO:0010369;GO:0005634;GO:0000786;GO:0046982;GO:000367	CC:chromocenter;CC:nucleus;CC:nucleosome;MF:protein heterodimerization activity;MF:DNA binding;	K11253	H3	------	------	------	------	XP_004512510.2	LOW QUALITY PROTEIN: histone H3.2 [Cicer arietinum]	sp|P59226|H32_ARATH;	Histone H3.2 OS=Arabidopsis thaliana OX=3702 GN=HTR2 PE=1 SV=2;	PF00125.26;PF15511.8;PF15630.8	Histone;CENP-T_C;CENP-S	Core histone H2A/H2B/H3/H4;Centromere kinetochore component CENP-T histone fold;CENP-S protein
gene_Solyc01g080750.3	Solyc01g080750.3	ARM repeat superfamily protein (AHRD V3.3 *** A0A2U1P293_ARTAN)	15.2	15.85	28.06	8.2	14.72	6.37	11.97	6.13	11.65	11.37	28.68	30.05	19.7033	9.76333	9.91667	23.3667	GO:0000226;GO:0005881;GO:000801	BP:microtubule cytoskeleton organization;CC:cytoplasmic microtubule;MF:microtubule binding;	------	------	------	------	ENOG410XSBP;ENOG411000D	S:Function unknown;	XP_004229496.1	TOG array regulator of axonemal microtubules protein 1 [Solanum lycopersicum]	sp|Q6A070|TGRM1_MOUSE;	TOG array regulator of axonemal microtubules protein 1 OS=Mus musculus OX=10090 GN=Togaram1 PE=1 SV=3;	PF12348.10	CLASP_N	CLASP N terminal
gene_Solyc01g086800.4	Solyc01g086800.4	Histone H3 (AHRD V3.3 *** B6SYV0_MAIZE)	0	0	0	0	0.14	0	0	0	0.16	3.4	2.81	5.25	0	0.046667	0.053333	3.82	GO:0010369;GO:0005634;GO:0000786;GO:0046982;GO:000367	CC:chromocenter;CC:nucleus;CC:nucleosome;MF:protein heterodimerization activity;MF:DNA binding;	K11253	H3	------	------	------	------	XP_004512510.2	LOW QUALITY PROTEIN: histone H3.2 [Cicer arietinum]	sp|P59226|H32_ARATH;	Histone H3.2 OS=Arabidopsis thaliana OX=3702 GN=HTR2 PE=1 SV=2;	PF00125.26;PF15715.7	Histone;PAF	Core histone H2A/H2B/H3/H4;PCNA-associated factor histone like domain
gene_Solyc01g087070.4	Solyc01g087070.4	ADP,ATP carrier protein, mitochondrial (AHRD V3.3 *** A0A2U1N934_ARTAN)	2.61	2.2	2.23	1.66	1.44	2.18	1.75	2.85	1.6	0.7	0.64	0.79	2.34667	1.76	2.06667	0.71	GO:0140021;GO:1990544;GO:0005743;GO:0016021;GO:000547	BP:mitochondrial ADP transmembrane transport;BP:mitochondrial ATP transmembrane transport;CC:mitochondrial inner membrane;CC:integral component of membrane;MF:AT;	K05863	SLC25A4S, ANT	------	------	ENOG410XNW0	U:Intracellular trafficking, secretion, and vesicular transport	XP_004229620.1	ADP,ATP carrier protein 1, mitochondrial [Solanum lycopersicum]	sp|P25083|ADT1_SOLTU;	ADP,ATP carrier protein, mitochondrial OS=Solanum tuberosum OX=4113 GN=ANT PE=2 SV=1;	PF00153.29	Mito_carr	Mitochondrial carrier protein
gene_Solyc01g088300.3	Solyc01g088300.3	Germin-like protein subfamily.1	14.05	10.42	13.76	5.58	14.8	13.17	13.08	8.47	13.35	25.3	18.68	25.8	12.7433	11.1833	11.6333	23.26	GO:0048046;GO:0005618;GO:0030145;GO:004573	CC:apoplast;CC:cell wall;MF:manganese ion binding;MF:nutrient reservoir activity;	------	------	------	------	ENOG410YPZ1	S:Function unknown	XP_004229689.1	germin-like protein subfamily 1 member 17 [Solanum lycopersicum]	sp|Q9SFF9|GL17_ARATH;	Germin-like protein subfamily 1 member 7 OS=Arabidopsis thaliana OX=3702 GN=At3g05950 PE=2 SV=1;	PF00190.24;PF07883.13	Cupin_1;Cupin_2	Cupin;Cupin domain
gene_Solyc01g089890.4	Solyc01g089890.4	PRA1 family protein (AHRD V3.11 *** tr|A0A2G3AMA6|A0A2G3AMA6_CAPAN)	12.95	12.98	13.08	28.51	19.34	20.33	27.57	42.65	13.33	6.34	7.5	3.22	13.0033	22.7267	27.85	5.68667	GO:001602	CC:integral component of membrane;	K20359	RABAC1, PRAF1	------	------	ENOG4111C7K	S:Function unknown	TMW90755.1	hypothetical protein EJD97_015307 [Solanum chilense]	------	------	PF03208.21	PRA1	PRA1 family protein
gene_Solyc01g090460.3	Solyc01g090460.3	HD-ZIP	6.4	7.41	9.41	2.87	6.83	5.21	5.42	3.87	7	6	19.27	13.65	7.74	4.97	5.43	12.9733	GO:0005634;GO:0043565;GO:0000981;GO:000367	CC:nucleus;MF:sequence-specific DNA binding;MF:RNA polymerase II transcription factor activity, sequence-specific DNA binding;MF:DNA binding;	K09338	HD-ZIP	------	------	ENOG410Z2UE	K:Transcription	NP_001234233.1	HD-ZIP protein [Solanum lycopersicum]	sp|P46602|HAT3_ARATH;	Homeobox-leucine zipper protein HAT3 OS=Arabidopsis thaliana OX=3702 GN=HAT3 PE=1 SV=2;	PF00046.31;PF04618.14;PF02183.20;PF05920.13	Homeodomain;HD-ZIP_N;HALZ;Homeobox_KN	Homeodomain;HD-ZIP protein N terminus;Homeobox associated leucine zipper;Homeobox KN domain
gene_Solyc01g091540.3	Solyc01g091540.3	Growth-regulating factor 10 (AHRD V3.3 *** A0A2G3AGX2_CAPAN)	0.57	1.52	2.35	1	1.52	0.89	2.37	1.06	2.11	3.1	6.04	5.72	1.48	1.13667	1.84667	4.95333	GO:0032502;GO:0006355;GO:0006351;GO:0005634;GO:000552	BP:developmental process;BP:regulation of transcription, DNA-templated;BP:transcription, DNA-templated;CC:nucleus;MF:ATP binding;	------	------	------	------	ENOG4111AY1	K:Transcription	XP_010325825.1	growth-regulating factor 9 [Solanum lycopersicum]	sp|Q8S9M3|GRF9_ARATH;	Growth-regulating factor 9 OS=Arabidopsis thaliana OX=3702 GN=GRF9 PE=1 SV=1;	PF08879.12;PF08880.13	WRC;QLQ	WRC;QLQ
gene_Solyc01g094380.2	Solyc01g094380.2	O-glucosyltransferase rumi-like protein (AHRD V3.3 *** A0A1J3GP63_NOCCA)	2.77	1.2	2.43	1.3	2.44	1.42	2.9	1.11	2.62	5.38	4.78	6.22	2.13333	1.72	2.21	5.46	GO:0016021;GO:001674	CC:integral component of membrane;MF:transferase activity;	------	------	------	------	ENOG410XT5U	S:Function unknown	XP_010326254.1	O-glucosyltransferase rumi homolog [Solanum lycopersicum]	sp|Q8T045|RUMI_DROME;	O-glucosyltransferase rumi OS=Drosophila melanogaster OX=7227 GN=rumi PE=1 SV=1;	PF05686.14	Glyco_transf_90	Glycosyl transferase family 90
gene_Solyc01g095530.2	Solyc01g095530.2	hypothetical protein (AHRD V3.3 *-* AT5G41761.1)	21.78	20.28	35.46	30.57	11.16	7.28	43.89	24.55	27.65	64.77	231.82	57.52	25.84	16.3367	32.03	118.037	------	------	------	------	------	------	ENOG410ZCA0	S:Function unknown	XP_010326840.1	uncharacterized protein LOC104649409 [Solanum lycopersicum]	------	------	------	------	------
gene_Solyc01g097280.3	Solyc01g097280.3	Pathogenesis-related protein 4b (AHRD V3.11 *** tr|A0A0H3TYE5|A0A0H3TYE5_CAPAN)	8.94	5.14	7.83	12.63	17.07	19.3	11.93	4.17	11.3	26.41	44.27	26.11	7.30333	16.3333	9.13333	32.2633	GO:0050832;GO:0042742;GO:0004540;GO:000806	BP:defense response to fungus;BP:defense response to bacterium;MF:ribonuclease activity;MF:chitin binding;	------	------	------	------	COG3979	G:Carbohydrate transport and metabolism	XP_004230092.1	wound-induced protein WIN1 [Solanum lycopersicum]	sp|P09761|WIN1_SOLTU;	Wound-induced protein WIN1 OS=Solanum tuberosum OX=4113 GN=WIN1 PE=2 SV=1;	PF00967.19;PF00187.21	Barwin;Chitin_bind_1	Barwin family;Chitin recognition protein
gene_Solyc01g098400.3	Solyc01g098400.3	Histidine phosphotransfer protein (AHRD V3.3 *** A0A0A1WCB7_NICAT)	2.38	3.67	4.24	2.8	7.76	1.4	4.2	0.78	4.59	5.81	45.51	17.84	3.43	3.98667	3.19	23.0533	GO:0009736;GO:0016310;GO:0000160;GO:0005737;GO:0005829;GO:0005634;GO:0009927;GO:004342	BP:cytokinin-activated signaling pathway;BP:phosphorylation;BP:phosphorelay signal transduction system;CC:cytoplasm;CC:cytosol;CC:nucleus;MF:histidine phosphotransfer kinase activity;MF:protein histidine kinase binding;	K14490	AHP	map04075	Plant hormone signal transduction	COG2198	T:Signal transduction mechanisms	XP_004230155.1	histidine-containing phosphotransfer protein 1 [Solanum lycopersicum]	sp|Q9ZNV9|AHP1_ARATH;	Histidine-containing phosphotransfer protein 1 OS=Arabidopsis thaliana OX=3702 GN=AHP1 PE=1 SV=1;	PF01627.25	Hpt	Hpt domain
gene_Solyc01g098570.2	Solyc01g098570.2	FANTASTIC four-like protein (DUF3049) (AHRD V3.3 *-* F4HX10_ARATH)	20.52	15.2	10.7	16.19	15.47	16	12.92	20.92	20.51	5.99	4.91	5.86	15.4733	15.8867	18.1167	5.58667	------	------	------	------	------	------	ENOG41113Z9	S:Function unknown	XP_004230162.1	protein FANTASTIC FOUR 3 [Solanum lycopersicum]	------	------	PF11250.10	FAF	Fantastic Four meristem regulator
gene_Solyc01g098590.3	Solyc01g098590.3	Phosphoglycerate mutase-like protein AT74 (AHRD V3.3 *** A0A2G2YZL9_CAPAN)	101.81	61.32	95.64	179.25	79.97	124.25	90.82	152.77	75.36	49.22	48.22	36.75	86.2567	127.823	106.317	44.73	GO:0003824;GO:001679	MF:catalytic activity;MF:phosphatase activity;	------	------	------	------	ENOG4111HP2	T:Signal transduction mechanisms	XP_004230164.1	phosphoglycerate mutase-like protein AT74 [Solanum lycopersicum]	sp|Q9MAA2|AT74_ARATH;	Phosphoglycerate mutase-like protein AT74 OS=Arabidopsis thaliana OX=3702 GN=At3g05170 PE=2 SV=1;	PF00300.24	His_Phos_1	Histidine phosphatase superfamily
gene_Solyc01g103960.3	Solyc01g103960.3	RNA helicase DEAH-box15	2.56	2.28	4.25	2.1	3.45	2.07	2.9	1.28	3.05	3.51	6.36	5.77	3.03	2.54	2.41	5.21333	GO:0006310;GO:0006281;GO:0032508;GO:0000724;GO:0070417;GO:0006260;GO:0071215;GO:0006268;GO:0005737;GO:0005694;GO:0005622;GO:0009506;GO:0005634;GO:0009378;GO:0016787;GO:0003676;GO:0043138;GO:000552	BP:DNA recombination;BP:DNA repair;BP:DNA duplex unwinding;BP:double-strand break repair via homologous recombination;BP:cellular response to cold;BP:DNA replication;BP:cellular response to abscisic acid stimulus;BP:DNA unwinding involved in DNA replication;CC:cytoplasm;CC:chromosome;CC:intracellular;CC:plasmodesma;CC:nucleus;MF:four-way junction helicase activity;MF:hydrolase activity;MF:nucleic…	K10901	BLM, RECQL3, SGS1	map03440	Homologous recombination	COG0514	L:Replication, recombination and repair	XP_004231337.1	ATP-dependent DNA helicase Q-like 4A [Solanum lycopersicum]	sp|Q8L840|RQL4A_ARATH;	ATP-dependent DNA helicase Q-like 4A OS=Arabidopsis thaliana OX=3702 GN=RECQL4A PE=2 SV=1;	PF09382.12;PF00271.33;PF00270.31;PF16124.7;PF00570.25;PF04851.17	RQC;Helicase_C;DEAD;RecQ_Zn_bind;HRDC;ResIII	RQC domain;Helicase conserved C-terminal domain;DEAD/DEAH box helicase;RecQ zinc-binding;HRDC domain;Type III restriction enzyme, res subunit
gene_Solyc01g104110.5	Solyc01g104110.5	11-S seed storage protein (AHRD V3.11 *** tr|A0A2U1KM33|A0A2U1KM33_ARTAN)	0	0	0.06	0.1	0	0.05	0	0	0.05	0.5	0.61	0.4	0.02	0.05	0.016667	0.503333	GO:004573	MF:nutrient reservoir activity;	------	------	------	------	ENOG41115JH	S:Function unknown	XP_019067358.1	12S seed storage protein CRD [Solanum lycopersicum]	sp|A0A222NNM9|COS1_COCNU;	Cocosin 1 OS=Cocos nucifera OX=13894 GN=COS-1 PE=1 SV=1;	PF00190.24	Cupin_1	Cupin
gene_Solyc01g104770.4	Solyc01g104770.4	Actin-related protein (AHRD V3.3 *** A0A200RCC6_9MAGN)	41.44	44.74	57.31	72.16	29.99	51.16	55.17	65.87	44	21.81	26.92	21.42	47.83	51.1033	55.0133	23.3833	GO:0005856;GO:0005737;GO:000552	CC:cytoskeleton;CC:cytoplasm;MF:ATP binding;	K10355	ACTF	------	------	COG5277	Z:Cytoskeleton	NP_001309931.1	actin [Solanum lycopersicum]	sp|P30173|ACT13_SOLTU;	Actin-101 OS=Solanum tuberosum OX=4113 GN=AC101 PE=3 SV=1;	PF00022.21	Actin	Actin
gene_Solyc01g105070.3	Solyc01g105070.3	LECEVI16G peroxidase precursor	19.22	18.99	15.15	11.78	7.24	10.86	5.53	9.23	5.14	3.41	3.21	2.41	17.7867	9.96	6.63333	3.01	GO:0006979;GO:0042744;GO:0055114;GO:0016021;GO:0005576;GO:0009505;GO:0009506;GO:0020037;GO:0046872;GO:000460	BP:response to oxidative stress;BP:hydrogen peroxide catabolic process;BP:oxidation-reduction process;CC:integral component of membrane;CC:extracellular region;CC:plant-type cell wall;CC:plasmodesma;MF:heme binding;MF:metal ion binding;MF:peroxidase activity;	K00430	E1.11.1.7	map00940	Phenylpropanoid biosynthesis	ENOG4111ADF	I:Lipid transport and metabolism	NP_001233970.2	peroxidase [Solanum lycopersicum]	sp|Q9XIV8|PERN1_TOBAC;	Peroxidase N1 OS=Nicotiana tabacum OX=4097 GN=poxN1 PE=1 SV=1;	PF00141.25	peroxidase	Peroxidase
gene_Solyc01g106500.4	Solyc01g106500.4	Receptor-like protein kinase (AHRD V3.3 *** A0A2R6Q659_ACTCH)	2.82	2.19	1.86	4.03	1.64	3.12	3.48	4.52	2.52	1.64	1.49	0.91	2.29	2.93	3.50667	1.34667	GO:0016021;GO:0005886;GO:0033612;GO:0004672;GO:0004674;GO:0005515;GO:000552	CC:integral component of membrane;CC:plasma membrane;MF:receptor serine/threonine kinase binding;MF:protein kinase activity;MF:protein serine/threonine kinase activity;MF:protein binding;MF:ATP binding;	------	------	------	------	COG4886	S:Function unknown	XP_004230660.1	receptor-like protein kinase 7 [Solanum lycopersicum]	sp|F4I2N7|RLK7_ARATH;	Receptor-like protein kinase 7 OS=Arabidopsis thaliana OX=3702 GN=RLK7 PE=1 SV=1;	PF13855.8;PF12799.9;PF08263.14	LRR_8;LRR_4;LRRNT_2	Leucine rich repeat;Leucine Rich repeats;Leucine rich repeat N-terminal domain
gene_Solyc01g107460.3	Solyc01g107460.3	Neuronal PAS domain protein (AHRD V3.11 *** tr|A0A1P8BBZ0|A0A1P8BBZ0_ARATH)	16.1	14.12	24.51	16.51	2.36	5.84	39.61	68.9	46.09	27.47	29.38	14.6	18.2433	8.23667	51.5333	23.8167	------	------	------	------	------	------	ENOG410YB32	S:Function unknown	XP_004230726.1	uncharacterized protein LOC101248432 [Solanum lycopersicum]	------	------	------	------	------
gene_Solyc01g108710.3	Solyc01g108710.3	Unknown protein	0	0	0	1.16	0	0	0	0.38	0	17.88	28.6	9.26	0	0.386667	0.126667	18.58	GO:001602	CC:integral component of membrane;	------	------	------	------	------	------	KAG5625079.1	hypothetical protein H5410_010297 [Solanum commersonii]	------	------	------	------	------
gene_Solyc01g109110.3	Solyc01g109110.3	Extra-large guanine nucleotide-binding protein 2 (AHRD V3.3 *** A0A1U8DXD5_CAPAN)	15.63	12.57	9.14	34.33	24.23	31.01	21.68	31.99	15.36	12.12	10.39	7.87	12.4467	29.8567	23.01	10.1267	GO:0006203;GO:0007188;GO:0042742;GO:0007186;GO:0005834;GO:0005634;GO:0031683;GO:0003924;GO:0019001;GO:0001664;GO:0008832;GO:000552	BP:dGTP catabolic process;BP:adenylate cyclase-modulating G-protein coupled receptor signaling pathway;BP:defense response to bacterium;BP:G-protein coupled receptor signaling pathway;CC:heterotrimeric G-protein complex;CC:nucleus;MF:G-protein beta/gamma-subunit complex binding;MF:GTPase activity;MF:guanyl nucleotide binding;MF:G-protein coupled receptor binding;MF:dGTPase activity;MF:GTP binding;	------	------	------	------	ENOG410XNVQ	S:Function unknown	XP_004230840.1	extra-large guanine nucleotide-binding protein 1-like [Solanum lycopersicum]	sp|O80462|XLG1_ARATH;	Extra-large guanine nucleotide-binding protein 1 OS=Arabidopsis thaliana OX=3702 GN=XLG1 PE=1 SV=2;	PF00503.22	G-alpha	G-protein alpha subunit
gene_Solyc01g150176.2	Solyc01g150176.2	Gibberellin regulated protein (AHRD V3.11 *** tr|A0A200Q364|A0A200Q364_9MAGN)	567.68	564.18	515.49	1020.04	403.04	1115.98	668.39	960.82	701.75	273.46	189.9	120.19	549.117	846.353	776.987	194.517	GO:0006952;GO:0005618;GO:000557	BP:defense response;CC:cell wall;CC:extracellular region;	------	------	------	------	ENOG410YWQ9	O:Posttranslational modification, protein turnover, chaperones	NP_001307142.1	snakin-2 precursor [Solanum lycopersicum]	sp|Q93X17|SNAK2_SOLTU;	Snakin-2 OS=Solanum tuberosum OX=4113 GN=SN2 PE=1 SV=1;	PF02704.16	GASA	Gibberellin regulated protein
gene_Solyc01g162440.1	Solyc01g162440.1	B3 domain-containing protein (AHRD V3.11 *** tr|A0A1Q3BBR1|A0A1Q3BBR1_CEPFO)	5.94	3.55	4.35	4.67	3.74	3.58	4.88	5.41	5.65	0.92	1.26	0.58	4.61333	3.99667	5.31333	0.92	GO:0005634;GO:000367	CC:nucleus;MF:DNA binding;	------	------	------	------	ENOG410YWR9	S:Function unknown	XP_015080050.1	B3 domain-containing protein Os04g0386900-like [Solanum pennellii]	------	------	------	------	------
gene_Solyc01g162470.1	Solyc01g162470.1	B3 domain-containing protein Os04g0386900-like (AHRD V3.11 *-* XP_019068745.1)	1.2	1.17	1.53	1.68	1.47	1.23	1.13	1.88	1.7	0.47	0.62	0.24	1.3	1.46	1.57	0.443333	GO:0005634;GO:0016021;GO:000367	CC:nucleus;CC:integral component of membrane;MF:DNA binding;	------	------	------	------	ENOG410YWR9	S:Function unknown	XP_015080050.1	B3 domain-containing protein Os04g0386900-like [Solanum pennellii]	------	------	------	------	------
gene_Solyc01g162830.1	Solyc01g162830.1	Nicotianamine synthase (AHRD V3.11 *** sp|Q9XGI7|NAS_SOLLC)	0.82	1.41	2.34	3.43	0.98	2.71	2.07	3.21	2.04	0.44	1.04	0.41	1.52333	2.37333	2.44	0.63	GO:0030418;GO:003041	BP:nicotianamine biosynthetic process;MF:nicotianamine synthase activity;	K05953	NAS	map00270;map00999	Cysteine and methionine metabolism;Biosynthesis of various plant secondary metabolites	ENOG4111NF0	E:Amino acid transport and metabolism	NP_001296307.1	nicotianamine synthase [Solanum lycopersicum]	sp|Q9XGI7|NAS_SOLLC;	Nicotianamine synthase OS=Solanum lycopersicum OX=4081 GN=CHLN PE=2 SV=1;	PF03059.18;PF13847.8	NAS;Methyltransf_31	Nicotianamine synthase protein;Methyltransferase domain
gene_Solyc02g031730.1	Solyc02g031730.1	Histone-lysine N-methyltransferase ATXR2 (AHRD V3.3 *-* A0A2G2Z378_CAPAN)	7.44	9.08	6.14	1.25	0.2	0.72	1.19	1.2	0.77	0.02	0.05	0.08	7.55333	0.723333	1.05333	0.05	------	------	------	------	------	------	------	------	XP_025885536.1	uncharacterized protein LOC112940978 [Solanum lycopersicum]	------	------	------	------	------
gene_Solyc02g032660.3	Solyc02g032660.3	Protein DETOXIFICATION (AHRD V3.3 *** A0A328DGG9_9ASTE)	52.9	54.1	48.7	50.45	25.87	59.89	36.93	65.46	38.94	21.1	18.05	10.56	51.9	45.4033	47.11	16.57	GO:0006855;GO:0055085;GO:0016021;GO:0016020;GO:0015297;GO:0015238;GO:0022857;GO:004291	BP:drug transmembrane transport;BP:transmembrane transport;CC:integral component of membrane;CC:membrane;MF:antiporter activity;MF:drug transmembrane transporter activity;MF:transmembrane transporter activity;MF:xenobiotic transporter activity;	K03327	TC.MATE, SLC47A, norM, mdtK, dinF	------	------	COG0534	V:Defense mechanisms	XP_004231608.1	protein DETOXIFICATION 40 [Solanum lycopersicum]	sp|Q9LVD9|DTX40_ARATH;	Protein DETOXIFICATION 40 OS=Arabidopsis thaliana OX=3702 GN=DTX40 PE=1 SV=1;	PF01554.20	MatE	MatE
gene_Solyc02g062170.3	Solyc02g062170.3	Chalcone-flavanone isomerase family protein (AHRD V3.3 *-* AT5G66230.1)	4.52	4.48	7.89	2.54	5.05	2.07	3.75	2.32	4.48	4.45	9.45	9.5	5.63	3.22	3.51667	7.8	------	------	------	------	------	------	ENOG410ZCUP	S:Function unknown	XP_004233555.1	uncharacterized protein LOC101251248 [Solanum lycopersicum]	------	------	------	------	------
gene_Solyc02g062815.1	Solyc02g062815.1	transcription initiation factor TFIID subunit (AHRD V3.3 *-* AT5G65540.1)	0	0	0.8	0.45	0.7	0.46	0	0	0.08	3.91	1.97	1.84	0.266667	0.536667	0.026667	2.57333	GO:004698	MF:protein heterodimerization activity;	------	------	------	------	ENOG4111PBB	S:Function unknown	XP_025884124.1	uncharacterized protein LOC112940342 [Solanum lycopersicum]	------	------	------	------	------
gene_Solyc02g066980.1	Solyc02g066980.1	TPX2 (Targeting protein for Xklp2) protein family (AHRD V3.3 *** F4K9T9_ARATH)	0.28	0.23	0.57	0.19	0.41	0.24	0.29	0.28	0.17	0.6	1.04	1.54	0.36	0.28	0.246667	1.06	GO:0060236;GO:0032147;GO:0090307;GO:0005737;GO:0072686;GO:0005819;GO:0005880;GO:0005874;GO:0008017;GO:003029	BP:regulation of mitotic spindle organization;BP:activation of protein kinase activity;BP:mitotic spindle assembly;CC:cytoplasm;CC:mitotic spindle;CC:spindle;CC:nuclear microtubule;CC:microtubule;MF:microtubule binding;MF:protein kinase activator activity;	------	------	------	------	ENOG410YD2P	S:Function unknown	XP_010317121.1	axoneme-associated protein mst101(2)-like isoform X1 [Solanum lycopersicum]	sp|F4I2H7|TPX2_ARATH;	Protein TPX2 OS=Arabidopsis thaliana OX=3702 GN=TPX2 PE=1 SV=1;	PF06886.13	TPX2	Targeting protein for Xklp2
gene_Solyc02g066990.3	Solyc02g066990.3	Proline-rich protein 21 (AHRD V3.11 *-* tr|A0A2U1KA99|A0A2U1KA99_ARTAN)	0.08	0	0.11	0	0	0.05	0.08	0	0	0.13	1.09	0.65	0.063333	0.016667	0.026667	0.623333	GO:007030	MF:phosphatidic acid binding;	------	------	------	------	------	------	XP_004233381.2	uncharacterized protein At5g39570-like [Solanum lycopersicum]	------	------	------	------	------
gene_Solyc02g067050.3	Solyc02g067050.3	UPF03.1	86.67	142.68	95.61	92.65	92.46	164.37	43.58	38.02	31.9	15.75	15.54	8.88	108.32	116.493	37.8333	13.39	------	------	------	------	------	------	ENOG410Y35P	S:Function unknown	XP_004233379.1	uncharacterized protein LOC101247689 [Solanum lycopersicum]	sp|Q64UM6|Y2056_BACFR;	UPF0301 protein BF2056 OS=Bacteroides fragilis;	PF02622.17	DUF179	Uncharacterized ACR, COG1678
gene_Solyc02g068670.3	Solyc02g068670.3	Ankyrin repeat (AHRD V3.3 *** A0A200R0Y6_9MAGN)	1.14	0.56	0.6	2.45	0.78	1.62	1.5	2.17	0.94	0.46	0.78	0.4	0.766667	1.61667	1.53667	0.546667	GO:0016021;GO:001602	CC:integral component of membrane;CC:membrane;	------	------	------	------	COG0666	S:Function unknown	XP_010317038.1	ankyrin repeat-containing protein At5g02620-like isoform X1 [Solanum lycopersicum]	sp|Q9C7A2|ITN1_ARATH;	Ankyrin repeat-containing protein ITN1 OS=Arabidopsis thaliana OX=3702 GN=ITN1 PE=1 SV=1;	PF13962.8;PF12796.9;PF13857.8	PGG;Ank_2;Ank_5	Domain of unknown function;Ankyrin repeats;Ankyrin repeats
gene_Solyc02g069110.5	Solyc02g069110.5	Cathepsin B-like cysteine proteinase (AHRD V3.11 *** tr|Q40413|Q40413_NICRU)	0	0.05	0	0	0.05	0	0	0	0.05	6.48	3	10.38	0.016667	0.016667	0.016667	6.62	GO:0051603;GO:0050790;GO:0006508;GO:0005615;GO:0005764;GO:0004197;GO:000823	BP:proteolysis involved in cellular protein catabolic process;BP:regulation of catalytic activity;BP:proteolysis;CC:extracellular space;CC:lysosome;MF:cysteine-type endopeptidase activity;MF:cysteine-type peptidase activity;	K01363	CTSB	------	------	COG4870	O:Posttranslational modification, protein turnover, chaperones	XP_004233222.1	cathepsin B-like protease 2 [Solanum lycopersicum]	sp|Q93VC9|CATB2_ARATH;	Cathepsin B-like protease 2 OS=Arabidopsis thaliana OX=3702 GN=CATHB2 PE=2 SV=1;	PF00112.25;PF08127.15	Peptidase_C1;Propeptide_C1	Papain family cysteine protease;Peptidase family C1 propeptide
gene_Solyc02g070280.3	Solyc02g070280.3	Cationic amino acid transporter (AHRD V3.3 *** S8D7Y4_9LAMI)	17.95	14.01	12.76	39.46	17.93	37.81	33.8	49.13	23.94	16.73	14.77	8.72	14.9067	31.7333	35.6233	13.4067	GO:0051938;GO:0006865;GO:0055085;GO:0016020;GO:0016021;GO:0005886;GO:0005313;GO:0022857;GO:0015189;GO:001517	BP:L-glutamate import;BP:amino acid transport;BP:transmembrane transport;CC:membrane;CC:integral component of membrane;CC:plasma membrane;MF:L-glutamate transmembrane transporter activity;MF:transmembrane transporter activity;MF:L-lysine transmembrane transporter activity;MF:amino acid transmembrane transporter activity;	K03294	TC.APA	------	------	COG0531	E:Amino acid transport and metabolism	XP_004233142.1	cationic amino acid transporter 1 [Solanum lycopersicum]	sp|Q84MA5|CAAT1_ARATH;	Cationic amino acid transporter 1 OS=Arabidopsis thaliana OX=3702 GN=CAT1 PE=1 SV=1;	PF13520.8;PF00324.23;PF13906.8;PF03845.15	AA_permease_2;AA_permease;AA_permease_C;Spore_permease	Amino acid permease;Amino acid permease;C-terminus of AA_permease;Spore germination protein
gene_Solyc02g071090.3	Solyc02g071090.3	Purine permease (AHRD V3.3 *** A0A2U1LZ22_ARTAN),Pfam:PF16913	43.14	43.08	31.24	25.74	15.07	31.12	34.37	35.81	34.46	9.85	9.88	4.74	39.1533	23.9767	34.88	8.15667	GO:0016021;GO:001521	CC:integral component of membrane;MF:purine nucleoside transmembrane transporter activity;	------	------	------	------	ENOG4111D9S	U:Intracellular trafficking, secretion, and vesicular transport	XP_004233087.1	probable purine permease 10 [Solanum lycopersicum]	sp|O49725|PUP10_ARATH;	Probable purine permease 10 OS=Arabidopsis thaliana OX=3702 GN=PUP10 PE=2 SV=2;	PF16913.7	PUNUT	Purine nucleobase transmembrane transport
gene_Solyc02g071100.3	Solyc02g071100.3	Purine permease (AHRD V3.3 *** A0A2U1LZ22_ARTAN),Pfam:PF16913	11	13.9	12.81	14.07	9.5	18.56	16.12	12.83	14.34	6.59	8.06	5.52	12.57	14.0433	14.43	6.72333	GO:0016021;GO:001521	CC:integral component of membrane;MF:purine nucleoside transmembrane transporter activity;	------	------	------	------	ENOG4111D9S	U:Intracellular trafficking, secretion, and vesicular transport	XP_025885123.1	probable purine permease 10 [Solanum lycopersicum]	sp|O49725|PUP10_ARATH;	Probable purine permease 10 OS=Arabidopsis thaliana OX=3702 GN=PUP10 PE=2 SV=2;	PF16913.7	PUNUT	Purine nucleobase transmembrane transport
gene_Solyc02g071470.5	Solyc02g071470.5	2-oxoglutarate (2OG) and Fe(II)-dependent oxygenase superfamily protein (AHRD V3.11 *** tr|Q9SB33|Q9SB33_ARATH)	0.94	1.89	0.32	4.61	1.64	2.88	2.77	3.9	1.97	0.71	1.18	0.29	1.05	3.04333	2.88	0.726667	GO:0032259;GO:0031418;GO:0051213;GO:0008168;GO:0046872;GO:001649	BP:methylation;MF:L-ascorbic acid binding;MF:dioxygenase activity;MF:methyltransferase activity;MF:metal ion binding;MF:oxidoreductase activity;	------	------	------	------	COG3491	S:Function unknown	NP_001352380.1	protein SRG1-like [Solanum lycopersicum]	sp|Q39224|SRG1_ARATH;	Protein SRG1 OS=Arabidopsis thaliana OX=3702 GN=SRG1 PE=2 SV=1;	PF14226.8;PF03171.22	DIOX_N;2OG-FeII_Oxy	non-haem dioxygenase in morphine synthesis N-terminal;2OG-F
gene_Solyc02g071560.5	Solyc02g071560.5	Subtilisin-like protease (AHRD V3.11 *** tr|A0A2I0VHD6|A0A2I0VHD6_9ASPA)	0.67	0.66	0.3	9.27	2.15	5.58	2.79	3.76	1.17	0.23	0.7	0.14	0.543333	5.66667	2.57333	0.356667	GO:0006508;GO:000425	BP:proteolysis;MF:serine-type endopeptidase activity;	------	------	------	------	COG1404	O:Posttranslational modification, protein turnover, chaperones	XP_004232982.1	subtilisin-like protease SBT5.6 [Solanum lycopersicum]	sp|Q9FK76|SBT56_ARATH;	Subtilisin-like protease SBT5.6 OS=Arabidopsis thaliana OX=3702 GN=SBT5.6 PE=2 SV=1;	PF00082.24;PF17766.3;PF05922.18	Peptidase_S8;fn3_6;Inhibitor_I9	Subtilase family;Fibronectin type-III domain;Peptidase inhibitor I9
gene_Solyc02g071970.1	Solyc02g071970.1	N66 matrix protein (AHRD V3.3 *** XP_004233072.1)	3.43	4.37	4.39	17.61	5.73	12.71	14.15	23.8	10.54	4.72	5.38	2.48	4.06333	12.0167	16.1633	4.19333	GO:001602	CC:integral component of membrane;	------	------	------	------	------	------	XP_004233072.1	N66 matrix protein [Solanum lycopersicum]	------	------	------	------	------
gene_Solyc02g072470.4	Solyc02g072470.4	Receptor-like protein kinase (AHRD V3.3 *** A0A2R6Q6W2_ACTCH)	4.89	4.29	3.88	6.16	2.88	5.82	4.68	7.67	3.47	2.29	2.87	1.91	4.35333	4.95333	5.27333	2.35667	GO:0006468;GO:0046777;GO:0016021;GO:0005886;GO:0004672;GO:0004674;GO:000552	BP:protein phosphorylation;BP:protein autophosphorylation;CC:integral component of membrane;CC:plasma membrane;MF:protein kinase activity;MF:protein serine/threonine kinase activity;MF:ATP binding;	K13420	FLS2	map04016;map04626	MAPK signaling pathway - plant;Plant-pathogen interaction	COG4886;COG0515	S:Function unknown;T:Signal transduction mechanisms	XP_010316829.1	probable LRR receptor-like serine/threonine-protein kinase At3g47570 [Solanum lycopersicum]	sp|C0LGP4|Y3475_ARATH;	Probable LRR receptor-like serine/threonine-protein kinase At3g47570 OS=Arabidopsis thaliana OX=3702 GN=At3g47570 PE=2 SV=1;	PF13855.8;PF00069.27;PF07714.19;PF12799.9;PF08263.14;PF03109.18	LRR_8;Pkinase;PK_Tyr_Ser-Thr;LRR_4;LRRNT_2;ABC1	Leucine rich repeat;Protein kinase domain;Protein tyrosine and serine/threonine kinase;Leucine Rich repeats;Leucine rich repeat N-terminal domain;ABC1 atypical kinase-like domain
gene_Solyc02g076980.5.1	Solyc02g076980.5.1	Cysteine protease-like protein (AHRD V3.3 *** Q9SG15_ARATH)	15.77	9.51	6.49	11.48	3.46	10.54	8.66	11.54	4.3	2.3	1.92	1.68	10.59	8.49333	8.16667	1.96667	GO:0006508;GO:0016021;GO:000823	BP:proteolysis;CC:integral component of membrane;MF:cysteine-type peptidase activity;	K13441	RCR3	map04626	Plant-pathogen interaction	COG4870	O:Posttranslational modification, protein turnover, chaperones	TMW88221.1	hypothetical protein EJD97_018894 [Solanum chilense]	sp|Q9FJ47|SAG12_ARATH;	Senescence-specific cysteine protease SAG12 OS=Arabidopsis thaliana OX=3702 GN=SAG12 PE=1 SV=1;	PF00112.25;PF08246.14;PF03051.17	Peptidase_C1;Inhibitor_I29;Peptidase_C1_2	Papain family cysteine protease;Cathepsin propeptide inhibitor domain;Peptidase C1-like family
gene_Solyc02g077040.4	Solyc02g077040.4	phytophthora-inhibited protease 1	110.17	67.92	81.41	287.53	66.04	144.44	147.53	261.57	73.79	48.5	56.13	24.78	86.5	166.003	160.963	43.1367	GO:0051603;GO:0006508;GO:0005615;GO:0016021;GO:0005764;GO:0004197;GO:000823	BP:proteolysis involved in cellular protein catabolic process;BP:proteolysis;CC:extracellular space;CC:integral component of membrane;CC:lysosome;MF:cysteine-type endopeptidase activity;MF:cysteine-type peptidase activity;	------	------	------	------	COG4870	O:Posttranslational modification, protein turnover, chaperones	NP_001233949.2	phytophthora-inhibited protease 1 [Solanum lycopersicum]	sp|Q9FJ47|SAG12_ARATH;	Senescence-specific cysteine protease SAG12 OS=Arabidopsis thaliana OX=3702 GN=SAG12 PE=1 SV=1;	PF00112.25;PF08246.14;PF03051.17	Peptidase_C1;Inhibitor_I29;Peptidase_C1_2	Papain family cysteine protease;Cathepsin propeptide inhibitor domain;Peptidase C1-like family
gene_Solyc02g077110.4	Solyc02g077110.4	Phospholipase A1-II 1 (AHRD V3.11 *** tr|A0A2G3AN96|A0A2G3AN96_CAPAN)	7.81	8.13	8.02	16.08	8.01	18.91	6.75	8.43	4.53	3.19	3.13	2.4	7.98667	14.3333	6.57	2.90667	GO:0016042;GO:000897	BP:lipid catabolic process;MF:phosphatidylcholine 1-acylhydrolase activity;	------	------	------	------	ENOG410YDU3	S:Function unknown	XP_004232957.2	phospholipase A1-II 1-like [Solanum lycopersicum]	sp|A2WT95|PLA1_ORYSI;	Phospholipase A1-II 1 OS=Oryza sativa subsp. indica OX=39946 GN=OsI_03083 PE=3 SV=2;	PF01764.27	Lipase_3	Lipase
gene_Solyc02g077370.1	Solyc02g077370.1	Ethylene Response Factor C.5	11.77	7.43	6.68	17.09	35.77	11.84	13.22	20.44	10.9	6.39	3.91	5.06	8.62667	21.5667	14.8533	5.12	GO:0006952;GO:0006355;GO:0009873;GO:0005634;GO:0003700;GO:000367	BP:defense response;BP:regulation of transcription, DNA-templated;BP:ethylene-activated signaling pathway;CC:nucleus;MF:transcription factor activity, sequence-specific DNA binding;MF:DNA binding;	K13433	PTI5	map04626	Plant-pathogen interaction	ENOG410YP8B	K:Transcription	NP_001233987.1	pathogenesis-related genes transcriptional activator PTI5 [Solanum lycopersicum]	sp|O04681|PTI5_SOLLC;	Pathogenesis-related genes transcriptional activator PTI5 OS=Solanum lycopersicum OX=4081 GN=PTI5 PE=2 SV=1;	PF00847.22	AP2	AP2 domain
gene_Solyc02g078150.5	Solyc02g078150.5	PDDEXK-like protein (AHRD V3.11 *** tr|A0A2U1QIN2|A0A2U1QIN2_ARTAN)	0.67	1.6	2.51	3.24	1.4	0.24	1.21	0.06	0.37	12.42	36.55	7.35	1.59333	1.62667	0.546667	18.7733	------	------	------	------	------	------	ENOG410YC9T	S:Function unknown	XP_004232883.1	uncharacterized protein LOC101251740 [Solanum lycopersicum]	------	------	PF04720.14	PDDEXK_6	PDDEXK-like family of unknown function
gene_Solyc02g078660.4	Solyc02g078660.4	Hydroxyproline-rich glycoprotein family protein (AHRD V3.3 *-* A0A1P8AWR9_ARATH)	1.26	0.85	0.48	1.37	0.61	1.88	0.88	1.4	0.68	0.37	0.25	0.13	0.863333	1.28667	0.986667	0.25	GO:0009658;GO:0016021;GO:000970	BP:chloroplast organization;CC:integral component of membrane;CC:chloroplast outer membrane;	------	------	------	------	ENOG410YIBW	S:Function unknown	XP_010316722.2	uncharacterized protein At4g04980 [Solanum lycopersicum]	sp|Q1PEB4|Y4498_ARATH;	Uncharacterized protein At4g04980 OS=Arabidopsis thaliana OX=3702 GN=At4g04980 PE=2 SV=1;	------	------	------
gene_Solyc02g079330.3	Solyc02g079330.3	Equilibrative nucleotide transporter like (AHRD V3.3 *** A0A2R6QTM2_ACTCH)	7.34	5.65	5.51	4.48	3.14	3.18	5.47	5.39	4.47	1.61	1.7	1.53	6.16667	3.6	5.11	1.61333	GO:0006817;GO:1901642;GO:0016021;GO:0005886;GO:000533	BP:phosphate ion transport;BP:nucleoside transmembrane transport;CC:integral component of membrane;CC:plasma membrane;MF:nucleoside transmembrane transporter activity;	K15014	SLC29A1_2_3, ENT1_2_3	------	------	ENOG410Y3MT	S:Function unknown	XP_004232785.1	equilibrative nucleotide transporter 3-like [Solanum lycopersicum]	sp|Q9M0Y3|ENT3_ARATH;	Equilibrative nucleotide transporter 3 OS=Arabidopsis thaliana OX=3702 GN=ENT3 PE=1 SV=1;	PF01733.20	Nucleoside_tran	Nucleoside transporter
gene_Solyc02g079350.3	Solyc02g079350.3	Equilibrative nucleotide transporter like (AHRD V3.3 *** A0A2R6QTM2_ACTCH)	3.63	3.75	1.82	3.55	1.09	3.33	1.77	2.71	2.25	0.23	0.27	0.44	3.06667	2.65667	2.24333	0.313333	GO:0006817;GO:1901642;GO:0016021;GO:0005886;GO:000533	BP:phosphate ion transport;BP:nucleoside transmembrane transport;CC:integral component of membrane;CC:plasma membrane;MF:nucleoside transmembrane transporter activity;	K15014	SLC29A1_2_3, ENT1_2_3	------	------	ENOG410Y3MT	S:Function unknown	XP_004232782.1	equilibrative nucleotide transporter 3-like [Solanum lycopersicum]	sp|Q9M0Y3|ENT3_ARATH;	Equilibrative nucleotide transporter 3 OS=Arabidopsis thaliana OX=3702 GN=ENT3 PE=1 SV=1;	PF01733.20	Nucleoside_tran	Nucleoside transporter
gene_Solyc02g080010.3	Solyc02g080010.3	Cysteine-rich receptor-like protein kinase 10 (AHRD V3.11 *** tr|A0A2G2XFS8|A0A2G2XFS8_CAPBA)	45.77	40.54	35.66	75.33	63.79	69.28	50.34	66.73	31.68	22.27	19.55	13.19	40.6567	69.4667	49.5833	18.3367	GO:0016021;GO:0016020;GO:0005524;GO:000467	CC:integral component of membrane;CC:membrane;MF:ATP binding;MF:protein kinase activity;	------	------	------	------	COG0515	T:Signal transduction mechanisms	XP_010316619.1	putative receptor-like protein kinase At4g00960 isoform X1 [Solanum lycopersicum]	sp|O65479|CRK20_ARATH;	Putative cysteine-rich receptor-like protein kinase 20 OS=Arabidopsis thaliana OX=3702 GN=CRK20 PE=2 SV=2;	PF07714.19;PF00069.27;PF01657.19;PF01636.25	PK_Tyr_Ser-Thr;Pkinase;Stress-antifung;APH	Protein tyrosine and serine/threonine kinase;Protein kinase domain;Salt stress response/antifungal;Phosphotransferase enzyme family
gene_Solyc02g080040.4	Solyc02g080040.4	Cysteine-rich receptor-like protein kinase 29 (AHRD V3.3 *** A0A2G2XFA8_CAPBA)	3.86	3.16	2.81	11.27	8.32	10.43	7.59	9.67	6.11	2.18	1.9	1.88	3.27667	10.0067	7.79	1.98667	GO:0006468;GO:0016021;GO:0005886;GO:0004672;GO:0004674;GO:000552	BP:protein phosphorylation;CC:integral component of membrane;CC:plasma membrane;MF:protein kinase activity;MF:protein serine/threonine kinase activity;MF:ATP binding;	------	------	------	------	COG0515	T:Signal transduction mechanisms	XP_025885209.1	cysteine-rich receptor-like protein kinase 10 [Solanum lycopersicum]	sp|Q8GYA4|CRK10_ARATH;	Cysteine-rich receptor-like protein kinase 10 OS=Arabidopsis thaliana OX=3702 GN=CRK10 PE=1 SV=3;	PF07714.19;PF00069.27;PF01636.25	PK_Tyr_Ser-Thr;Pkinase;APH	Protein tyrosine and serine/threonine kinase;Protein kinase domain;Phosphotransferase enzyme family
gene_Solyc02g080080.3	Solyc02g080080.3	Cysteine-rich receptor-like protein kinase 29 (AHRD V3.3 *** A0A2G2XFA8_CAPBA)	8.51	6.79	7.91	11.54	6.35	9.3	10.06	12.9	7.64	3.96	4.8	1.82	7.73667	9.06333	10.2	3.52667	GO:0006468;GO:0016021;GO:0016020;GO:0005886;GO:0004674;GO:0004672;GO:000552	BP:protein phosphorylation;CC:integral component of membrane;CC:membrane;CC:plasma membrane;MF:protein serine/threonine kinase activity;MF:protein kinase activity;MF:ATP binding;	------	------	------	------	COG0515	T:Signal transduction mechanisms	XP_010316618.1	putative receptor-like protein kinase At4g00960 isoform X1 [Solanum lycopersicum]	sp|Q8S9L6|CRK29_ARATH;	Cysteine-rich receptor-like protein kinase 29 OS=Arabidopsis thaliana OX=3702 GN=CRK29 PE=2 SV=1;	PF07714.19;PF00069.27;PF01657.19;PF01636.25;PF15102.8	PK_Tyr_Ser-Thr;Pkinase;Stress-antifung;APH;TMEM154	Protein tyrosine and serine/threonine kinase;Protein kinase domain;Salt stress response/antifungal;Phosphotransferase enzyme family;TMEM154 protein family
gene_Solyc02g080200.5	Solyc02g080200.5	Pectinesterase (AHRD V3.11 *** tr|A0A2G2VBJ7|A0A2G2VBJ7_CAPBA)	3.07	2.5	3.56	1.51	3.71	1.36	2.36	0.54	3.41	4.66	5.11	10.66	3.04333	2.19333	2.10333	6.81	GO:0042545;GO:0045490;GO:0005618;GO:0016021;GO:0005576;GO:0046910;GO:0030599;GO:0045330;GO:000485	BP:cell wall modification;BP:pectin catabolic process;CC:cell wall;CC:integral component of membrane;CC:extracellular region;MF:pectinesterase inhibitor activity;MF:pectinesterase activity;MF:aspartyl esterase activity;MF:enzyme inhibitor activity;	K01051	E3.1.1.11	map00040	Pentose and glucuronate interconversions	COG4677	G:Carbohydrate transport and metabolism	XP_004232737.1	pectinesterase [Solanum lycopersicum]	sp|Q1JPL7|PME18_ARATH;	Pectinesterase/pectinesterase inhibitor 18 OS=Arabidopsis thaliana OX=3702 GN=PME18 PE=1 SV=3;	PF01095.21;PF04043.17;PF12708.9	Pectinesterase;PMEI;Pectate_lyase_3	Pectinesterase;Plant invertase/pectin methylesterase inhibitor;Pectate lyase superfamily protein
gene_Solyc02g080260.4	Solyc02g080260.4	Woolly	4.92	7.01	10.99	6.48	12.9	6.47	12.71	7.41	15.36	16.64	19.11	31.01	7.64	8.61667	11.8267	22.2533	GO:0005634;GO:0008289;GO:000367	CC:nucleus;MF:lipid binding;MF:DNA binding;	K09338	HD-ZIP	------	------	ENOG411107H	K:Transcription	XP_004232734.1	homeobox-leucine zipper protein PROTODERMAL FACTOR 2 [Solanum lycopersicum]	sp|Q93V99|PDF2_ARATH;	Homeobox-leucine zipper protein PROTODERMAL FACTOR 2 OS=Arabidopsis thaliana OX=3702 GN=PDF2 PE=1 SV=1;	PF01852.21;PF00046.31	START;Homeodomain	START domain;Homeodomain
gene_Solyc02g081970.4	Solyc02g081970.4	Vacuolar-sorting receptor.1	33.16	29.86	25.84	57.77	26.82	48.94	46.41	65.85	35.23	21.81	21.24	13.99	29.62	44.51	49.1633	19.0133	GO:0006896;GO:0006623;GO:0006511;GO:0005794;GO:0005802;GO:0016021;GO:0016020;GO:0005768;GO:0017119;GO:0061630;GO:000550	BP:Golgi to vacuole transport;BP:protein targeting to vacuole;BP:ubiquitin-dependent protein catabolic process;CC:Golgi apparatus;CC:trans-Golgi network;CC:integral component of membrane;CC:membrane;CC:endosome;CC:Golgi transport complex;MF:ubiquitin protein ligase activity;MF:calcium ion binding;	------	------	------	------	ENOG41105IF	U:Intracellular trafficking, secretion, and vesicular transport	XP_004232618.1	vacuolar-sorting receptor 6 [Solanum lycopersicum]	sp|Q9FYH7|VSR6_ARATH;	Vacuolar-sorting receptor 6 OS=Arabidopsis thaliana OX=3702 GN=VSR6 PE=2 SV=3;	PF02225.24;PF12662.9	PA;cEGF	PA domain;Complement Clr-like EGF-like
gene_Solyc02g082930.3	Solyc02g082930.3	acidic extracellular 27 kD chitinase	112.56	65.59	91.94	44.13	82.13	94.39	85.58	44.33	69.75	122.19	164.55	154.39	90.03	73.55	66.5533	147.043	GO:0006952;GO:0005975;GO:0016998;GO:0000272;GO:0050832;GO:0009607;GO:0006032;GO:0005615;GO:0005576;GO:000456	BP:defense response;BP:carbohydrate metabolic process;BP:cell wall macromolecule catabolic process;BP:polysaccharide catabolic process;BP:defense response to fungus;BP:response to biotic stimulus;BP:chitin catabolic process;CC:extracellular space;CC:extracellular region;MF:chitinase activity;	K20547	CHIB	map00520;map04016	Amino sugar and nucleotide sugar metabolism;MAPK signaling pathway - plant	COG3979	G:Carbohydrate transport and metabolism	NP_001234400.1	acidic 27 kDa endochitinase precursor [Solanum lycopersicum]	sp|Q05540|CHIB_SOLLC;	Acidic 27 kDa endochitinase OS=Solanum lycopersicum OX=4081 GN=CHI17 PE=1 SV=1;	PF00182.21	Glyco_hydro_19	Chitinase class I
gene_Solyc02g083460.3	Solyc02g083460.3	Eukaryotic aspartyl protease family protein (AHRD V3.3 *** A0A2U1KXY4_ARTAN)	26.91	21.65	19.21	40.17	22.31	30.58	31.03	48.93	23.91	15.54	16.09	13.8	22.59	31.02	34.6233	15.1433	GO:0016021;GO:000419	CC:integral component of membrane;MF:aspartic-type endopeptidase activity;	------	------	------	------	ENOG410XNV7	O:Posttranslational modification, protein turnover, chaperones	NP_001333366.1	aspartyl protease family protein precursor [Solanum lycopersicum]	sp|Q8VYV9|APF1_ARATH;	Aspartyl protease family protein 1 OS=Arabidopsis thaliana OX=3702 GN=APF1 PE=2 SV=1;	PF14543.8;PF00026.25;PF14541.8	TAXi_N;Asp;TAXi_C	Xylanase inhibitor N-terminal;Eukaryotic aspartyl protease;Xylanase inhibitor C-terminal
gene_Solyc02g085170.4	Solyc02g085170.4	Sugar facilitator protein 10	0.55	0.37	0.97	0.23	0.38	0.11	0.31	0.25	0.65	0.77	6.26	1.31	0.63	0.24	0.403333	2.78	GO:0006817;GO:0055085;GO:0008643;GO:0016021;GO:002285	BP:phosphate ion transport;BP:transmembrane transport;BP:carbohydrate transport;CC:integral component of membrane;MF:transmembrane transporter activity;	K03444	ERD6, ESL1	------	------	ENOG410XNQK	G:Carbohydrate transport and metabolism	TMW87645.1	hypothetical protein EJD97_019684 [Solanum chilense]	sp|Q93YP9|ERDL4_ARATH;	Sugar transporter ERD6-like 4 OS=Arabidopsis thaliana OX=3702 GN=At1g19450 PE=2 SV=1;	PF00083.26;PF07690.18;PF13347.8	Sugar_tr;MFS_1;MFS_2	Sugar;Major Facilitator Superfamily;MFS/sugar transport protein
gene_Solyc02g086454.2	Solyc02g086454.2	titin isoform X6 (AHRD V3.11 *-* XP_010316304.1)	47.45	42.84	41.29	84.43	22.26	75.06	60.83	92.85	45.56	18.1	21.62	9.39	43.86	60.5833	66.4133	16.37	------	------	------	------	------	------	ENOG410ZVAE	S:Function unknown	XP_010316304.1	titin isoform X6 [Solanum lycopersicum]	------	------	------	------	------
gene_Solyc02g086458.2	Solyc02g086458.2	titin isoform X2 (AHRD V3.11 *-* XP_010316302.1)	105.77	99.9	106.02	195.16	53.41	164.29	138.97	235.32	115.52	51.25	54.94	23.5	103.897	137.62	163.27	43.23	------	------	------	------	------	------	ENOG410ZVAE	S:Function unknown	XP_010316302.1	titin isoform X2 [Solanum lycopersicum]	------	------	------	------	------
gene_Solyc02g086530.4	Solyc02g086530.4	Raffinose synthase (AHRD V3.3 *** G5DF09_9LAMI)	1.57	2.06	0.99	3.49	2.18	2.11	1.49	2.34	1.41	0.58	0.67	0.75	1.54	2.59333	1.74667	0.666667	GO:0009737;GO:0009414;GO:0005975;GO:0006979;GO:0009507;GO:0047274;GO:001675	BP:response to abscisic acid;BP:response to water deprivation;BP:carbohydrate metabolic process;BP:response to oxidative stress;CC:chloroplast;MF:galactinol-sucrose galactosyltransferase activity;MF:transferase activity, transferring glycosyl groups;	K06617	E2.4.1.82	map00052	Galactose metabolism	ENOG410YBUA	S:Function unknown	XP_004232319.1	galactinol--sucrose galactosyltransferase [Solanum lycopersicum]	sp|Q8VWN6|RFS_PEA;	Galactinol--sucrose galactosyltransferase OS=Pisum sativum OX=3888 GN=RFS PE=1 SV=1;	PF05691.14	Raffinose_syn	Raffinose synthase or seed imbibition protein Sip1
gene_Solyc02g086970.4	Solyc02g086970.4	Aldehyde dehydrogenase (AHRD V3.3 *** A0A2U1MUY7_ARTAN)	253.2	332.24	289.67	59.25	34.63	63.87	57.39	76.17	48.05	18.71	15.99	12.44	291.703	52.5833	60.5367	15.7133	GO:0055114;GO:0016491;GO:0016620;GO:000402	BP:oxidation-reduction process;MF:oxidoreductase activity;MF:oxidoreductase activity, acting on the aldehyde or oxo group of donors, NAD or NADP as acceptor;MF:aldehyde dehydrogenas;	K00128	ALDH	map00310;map00561;map00280;map01240;map00903;map00330;map00053;map00380;map00010;map00620;map00071;map00340;map00770;map00410	Lysine degradation;Glycerolipid metabolism;Valine, leucine and isoleucine degradation;Biosynthesis of cofactors;Limonene and pinene degradation;Arginine and proline metabolism;Ascorbate and aldarate metabolism;Tryptophan metabolism;Glycolysis / Gluconeogenesis;Pyruvate metabolism;Fatty acid degradation;Histidine metabolism;Pantothenate and CoA biosynthesis;beta-Alanine metabolism	COG1012	C:Energy production and conversion	XP_010316283.1	aldehyde dehydrogenase family 2 member B7, mitochondrial [Solanum lycopersicum]	sp|C7A2A0|BALDH_ANTMA;	Benzaldehyde dehydrogenase, mitochondrial OS=Antirrhinum majus OX=4151 GN=BALDH PE=1 SV=1;	PF00171.24	Aldedh	Aldehyde dehydrogenase family
gene_Solyc02g089630.3	Solyc02g089630.3	Proline dehydrogenase (AHRD V3.3 *** A0A2G2XIU2_CAPBA)	161.43	142.07	108.09	39.8	16.99	25.53	20.42	42.08	26.5	8.46	7.47	3.3	137.197	27.44	29.6667	6.41	GO:0010133;GO:0006562;GO:0005739;GO:0004657;GO:007194	BP:proline catabolic process to glutamate;BP:proline catabolic process;CC:mitochondrion;MF:proline dehydrogenase activity;MF:FAD binding;	K00318	PRODH, fadM, putB	map00330	Arginine and proline metabolism	COG0506	E:Amino acid transport and metabolism	XP_004232111.1	proline dehydrogenase 2, mitochondrial [Solanum lycopersicum]	sp|Q6NKX1|PROD2_ARATH;	Proline dehydrogenase 2, mitochondrial OS=Arabidopsis thaliana OX=3702 GN=POX2 PE=2 SV=1;	PF01619.20	Pro_dh	Proline dehydrogenase
gene_Solyc02g090480.4	Solyc02g090480.4	Peptidyl-prolyl cis-trans isomerase CYP40 (AHRD V3.3 *** A0A2G3ABJ7_CAPAN)	6.92	9.3	11.01	5.22	10.4	4.48	7.7	3.4	7.97	9.23	19.74	14.21	9.07667	6.7	6.35667	14.3933	GO:0000413;GO:0006457;GO:0005737;GO:0005515;GO:0003755;GO:001601	BP:protein peptidyl-prolyl isomerization;BP:protein folding;CC:cytoplasm;MF:protein binding;MF:peptidyl-prolyl cis-trans isomerase activity;MF:cyclosporin A binding;	K05864	PPID, CYPD	------	------	COG0652	O:Posttranslational modification, protein turnover, chaperones	XP_004232050.1	peptidyl-prolyl cis-trans isomerase CYP40-like [Solanum lycopersicum]	sp|Q9C566|CYP40_ARATH;	Peptidyl-prolyl cis-trans isomerase CYP40 OS=Arabidopsis thaliana OX=3702 GN=CYP40 PE=2 SV=1;	PF00160.23;PF00515.30;PF07719.19;PF13414.8;PF13181.8	Pro_isomerase;TPR_1;TPR_2;TPR_11;TPR_8	Cyclophilin type peptidyl-prolyl cis-trans isomerase/CLD;Tetratricopeptide repeat;Tetratricopeptide repeat;TPR repeat;Tetratricopeptide repeat
gene_Solyc02g091140.3	Solyc02g091140.3	S-adenosyl-L-methionine-dependent methyltransferases superfamily protein (AHRD V3.3 *** A0A1P8BFJ6_ARATH)	75.46	77.37	69.36	90.26	43.81	94.24	57.88	88.63	57.09	44.5	27.83	20.37	74.0633	76.1033	67.8667	30.9	GO:0032259;GO:0008757;GO:0046872;GO:000816	BP:methylation;MF:S-adenosylmethionine-dependent methyltransferase activity;MF:metal ion binding;MF:methyltransferase activity;	------	------	------	------	ENOG4111PH9	S:Function unknown	XP_004232014.1	probable S-adenosylmethionine-dependent methyltransferase At5g38780 [Solanum lycopersicum]	sp|B2KPR3|LAMT_CATRO;	Loganic acid O-methyltransferase OS=Catharanthus roseus OX=4058 GN=LAMT PE=1 SV=1;	PF03492.17	Methyltransf_7	SAM dependent carboxyl methyltransferase
gene_Solyc02g092820.4	Solyc02g092820.4	IAA-amido synthetase 3-4	0.32	0.32	0.83	0.55	1.18	1.08	1.35	0.28	1.21	3.85	7.29	3.29	0.49	0.936667	0.946667	4.81	GO:0005737;GO:001688	CC:cytoplasm;MF:acid-amino acid ligase activity;	K14487	GH3	map04075	Plant hormone signal transduction	ENOG410XQH0	S:Function unknown	XP_004231891.1	probable indole-3-acetic acid-amido synthetase GH3.1 [Solanum lycopersicum]	sp|O82333|GH31_ARATH;	Probable indole-3-acetic acid-amido synthetase GH3.1 OS=Arabidopsis thaliana OX=3702 GN=GH3.1 PE=2 SV=1;	PF03321.15	GH3	GH3 auxin-responsive promoter
gene_Solyc02g092950.3	Solyc02g092950.3	Microtubule-associated protein RP/EB family member 1C (AHRD V3.3 *** A0A2G2XGZ8_CAPBA)	4.95	3.27	7.18	3.71	8.81	4.49	6	2.24	7.02	7.55	17.65	12.75	5.13333	5.67	5.08667	12.65	GO:0031110;GO:0007049;GO:0009652;GO:0051225;GO:0051301;GO:1904825;GO:0005737;GO:0009524;GO:0005819;GO:0005730;GO:0005618;GO:0035371;GO:0005815;GO:0005881;GO:0005874;GO:0051233;GO:0008017;GO:005101	BP:regulation of microtubule polymerization or depolymerization;BP:cell cycle;BP:thigmotropism;BP:spindle assembly;BP:cell division;BP:protein localization to microtubule plus-end;CC:cytoplasm;CC:phragmoplast;CC:spindle;CC:nucleolus;CC:cell wall;CC:microtubule plus-end;CC:microtubule organizing center;CC:cytoplasmic microtubule;CC:microtubule;CC:spindle midzone;MF:microtubule binding;MF:microtubu…	K10436	MAPRE	------	------	COG5217	Z:Cytoskeleton	XP_004231880.1	microtubule-associated protein RP/EB family member 1C [Solanum lycopersicum]	sp|Q9FGQ6|EB1C_ARATH;	Microtubule-associated protein RP/EB family member 1C OS=Arabidopsis thaliana OX=3702 GN=EB1C PE=1 SV=1;	PF03271.19;PF00307.33;PF06294.13	EB1;CH;CH_2	EB1-like C-terminal motif;Calponin homology;CH-like domain in sperm protein
gene_Solyc02g150128.1	Solyc02g150128.1	Lrr receptor-like serinethreonine-protein kinase fls2 (AHRD V3.3 *** A0A314LAY5_NICAT)	2.39	2.03	2.07	5.13	1.26	3.99	2.92	5.35	1.33	0.63	0.72	0.47	2.16333	3.46	3.2	0.606667	GO:0009755;GO:0016021;GO:0005886;GO:0005524;GO:000467	BP:hormone-mediated signaling pathway;CC:integral component of membrane;CC:plasma membrane;MF:ATP binding;MF:protein kinase activity;	------	------	------	------	COG4886	S:Function unknown	XP_006362615.1	PREDICTED: probable LRR receptor-like serine/threonine-protein kinase At3g47570 [Solanum tuberosum]	sp|C0LGP4|Y3475_ARATH;	Probable LRR receptor-like serine/threonine-protein kinase At3g47570 OS=Arabidopsis thaliana OX=3702 GN=At3g47570 PE=2 SV=1;	PF00069.27;PF13855.8;PF07714.19;PF12799.9	Pkinase;LRR_8;PK_Tyr_Ser-Thr;LRR_4	Protein kinase domain;Leucine rich repeat;Protein tyrosine and serine/threonine kinase;Leucine Rich repeats
gene_Solyc03g005420.2	Solyc03g005420.2	Flotillin-like protein 2 (AHRD V3.3 *** A0A1U8GRB6_CAPAN)	13.88	8.37	5.21	5.23	6.69	9.48	7.03	8.23	7.82	2.88	3.73	2.2	9.15333	7.13333	7.69333	2.93667	GO:0072659;GO:0005901;GO:0044853;GO:000588	BP:protein localization to plasma membrane;CC:caveola;CC:plasma membrane raft;CC:plasma membrane;	K07192	FLOT	------	------	COG2268	S:Function unknown	XP_004234032.1	flotillin-like protein 6 [Solanum lycopersicum]	sp|D2XNR1|FLOT4_MEDTR;	Flotillin-like protein 4 OS=Medicago truncatula OX=3880 GN=FLOT4 PE=2 SV=1;	PF01145.27	Band_7	SPFH domain / Band 7 family
gene_Solyc03g006250.2	Solyc03g006250.2	GDSL esterase/lipase (AHRD V3.3 *** A0A1U8GGV5_CAPAN)	4.13	4.51	4.45	14.48	29.5	7.6	18.7	15.51	46.5	62.21	38.3	88.54	4.36333	17.1933	26.9033	63.0167	GO:001678	MF:hydrolase activity, acting on ester bonds;	------	------	------	------	COG3240	S:Function unknown	XP_004234096.1	GDSL esterase/lipase At1g28590 [Solanum lycopersicum]	sp|Q8RXT9|GDL8_ARATH;	GDSL esterase/lipase At1g28590 OS=Arabidopsis thaliana OX=3702 GN=At1g28590 PE=2 SV=2;	PF00657.24	Lipase_GDSL	GDSL-like Lipase/Acylhydrolase
gene_Solyc03g006360.3	Solyc03g006360.3	Auxin-repressed protein (AHRD V3.3 *** A9YSI8_TOBAC)	1.8	1.85	7.37	7.33	10.21	3.28	2.98	1.63	3.81	18.6	189.85	45.95	3.67333	6.94	2.80667	84.8	------	------	------	------	------	------	ENOG410YV4V	S:Function unknown	XP_004234112.1	dormancy-associated protein 1 isoform X1 [Solanum lycopersicum]	sp|O22611|DRM1_PEA;	Dormancy-associated protein 1 OS=Pisum sativum OX=3888 GN=DRM1 PE=2 SV=1;	PF05564.14	Auxin_repressed	Dormancy/auxin associated protein
gene_Solyc03g006410.3	Solyc03g006410.3	PDDEXK-like protein (AHRD V3.3 *** A0A2U1QIN2_ARTAN)	1.5	1.27	0.98	4.55	1.47	2.56	2.62	3.51	1.71	9.55	10.98	4.78	1.25	2.86	2.61333	8.43667	------	------	------	------	------	------	ENOG410YC9T	S:Function unknown	XP_004234117.1	uncharacterized protein LOC101259314 [Solanum lycopersicum]	------	------	PF04720.14	PDDEXK_6	PDDEXK-like family of unknown function
gene_Solyc03g006690.1	Solyc03g006690.1	FAD-binding Berberine family protein (AHRD V3.3 *-* A0A1P8BCJ3_ARATH)	5.6	7.28	5.87	4.13	0.72	2.59	3.02	3.54	2.33	0.14	0.54	0.19	6.25	2.48	2.96333	0.29	GO:0055114;GO:0050660;GO:0071949;GO:001649	BP:oxidation-reduction process;MF:flavin adenine dinucleotide binding;MF:FAD binding;MF:oxidoreductase activity;	------	------	------	------	COG0277	C:Energy production and conversion	TMW91917.1	hypothetical protein EJD97_013740 [Solanum chilense]	sp|Q9FKV0|BBE24_ARATH;	Berberine bridge enzyme-like 24 OS=Arabidopsis thaliana OX=3702 GN=At5g44380 PE=2 SV=1;	PF08031.14	BBE	Berberine and berberine like
gene_Solyc03g006780.2	Solyc03g006780.2	G-type lectin S-receptor-like serine/threonine-protein kinase (AHRD V3.3 *** A0A2G3A8X5_CAPAN)	0.15	0.19	0.25	0.57	0.64	0.2	0.6	0.04	0.56	1.81	1.96	2.96	0.196667	0.47	0.4	2.24333	GO:0006468;GO:0046777;GO:0106311;GO:0048544;GO:0016021;GO:0005886;GO:0106310;GO:0004672;GO:0030246;GO:0004674;GO:000552	BP:protein phosphorylation;BP:protein autophosphorylation;BP:old GO;BP:recognition of pollen;CC:integral component of membrane;CC:plasma membrane;CC:old GO;MF:protein kinase activity;MF:carbohydrate binding;MF:protein serine/threonine kinase activity;MF:ATP binding;	------	------	------	------	COG0515	T:Signal transduction mechanisms	XP_027771321.1	G-type lectin S-receptor-like serine/threonine-protein kinase At1g11410 [Solanum pennellii]	sp|Q9LPZ3|Y1141_ARATH;	G-type lectin S-receptor-like serine/threonine-protein kinase At1g11410 OS=Arabidopsis thaliana OX=3702 GN=At1g11410 PE=3 SV=3;	PF00954.22;PF01453.26;PF07714.19;PF00069.27;PF08276.13	S_locus_glycop;B_lectin;PK_Tyr_Ser-Thr;Pkinase;PAN_2	S-locus glycoprotein domain;D-mannose binding lectin;Protein tyrosine and serine/threonine kinase;Protein kinase domain;PAN-like domain
gene_Solyc03g006880.3	Solyc03g006880.3	gibberellin 20-oxidase-1	5.57	5.38	6.44	3.62	2.57	2.96	2.87	1.46	2.24	7.18	4.2	9.15	5.79667	3.05	2.19	6.84333	GO:0009826;GO:0009686;GO:0009416;GO:0009908;GO:0055114;GO:0031418;GO:0051213;GO:0045544;GO:0046872;GO:001649	BP:unidimensional cell growth;BP:gibberellin biosynthetic process;BP:response to light stimulus;BP:flower development;BP:oxidation-reduction process;MF:L-ascorbic acid binding;MF:dioxygenase activity;MF:gibberellin 20-oxidase activity;MF:metal ion binding;MF:oxidoreductase activity;	K05282	GA20ox	map00904	Diterpenoid biosynthesis	COG3491	S:Function unknown	NP_001234070.1	gibberellin 20-oxidase-1 [Solanum lycopersicum]	sp|Q39110|GAOX1_ARATH;	Gibberellin 20 oxidase 1 OS=Arabidopsis thaliana OX=3702 GN=GA20OX1 PE=2 SV=2;	PF03171.22;PF14226.8	2OG-FeII_Oxy;DIOX_N	2OG-F;non-haem dioxygenase in morphine synthesis N-terminal
gene_Solyc03g007240.3	Solyc03g007240.3	spermine synthase,Pfam:PF01564	44.34	49.47	54.38	96.14	192.92	54.48	123.71	64.04	223.95	319.22	251.91	455.64	49.3967	114.513	137.233	342.257	GO:0006596;GO:0008295;GO:0016740;GO:000476	BP:polyamine biosynthetic process;BP:spermidine biosynthetic process;MF:transferase activity;MF:spermidine synthase activity;	K00797	speE, SRM, SPE3	map00270;map00480;map00330	Cysteine and methionine metabolism;Glutathione metabolism;Arginine and proline metabolism	COG0421	E:Amino acid transport and metabolism	NP_001234407.1	SPM1 protein [Solanum lycopersicum]	sp|Q94BN2|SPSY_ARATH;	Spermine synthase OS=Arabidopsis thaliana OX=3702 GN=SPMS PE=1 SV=1;	PF01564.19;PF17284.4;PF13649.8	Spermine_synth;Spermine_synt_N;Methyltransf_25	Spermine/spermidine synthase domain;Spermidine synthase tetramerisation domain;Methyltransferase domain
gene_Solyc03g007380.2	Solyc03g007380.2	WRKY transcription factor 52	2.34	1.66	1.84	8.43	11.22	8.32	5.66	10.27	3.82	1.53	1.92	0.76	1.94667	9.32333	6.58333	1.40333	GO:0006355;GO:0005634;GO:0003700;GO:0043565;GO:000097	BP:regulation of transcription, DNA-templated;CC:nucleus;MF:transcription factor activity, sequence-specific DNA binding;MF:sequence-specific DNA binding;MF:transcription regulatory region sequence-specific DNA binding;	------	------	------	------	ENOG410YZU1	K:Transcription	XP_004234275.1	probable WRKY transcription factor 41 [Solanum lycopersicum]	sp|Q8H0Y8|WRK41_ARATH;	Probable WRKY transcription factor 41 OS=Arabidopsis thaliana OX=3702 GN=WRKY41 PE=1 SV=2;	PF03106.17	WRKY	WRKY DNA -binding domain
gene_Solyc03g019890.3	Solyc03g019890.3	beta-galactosidase 7	9.16	10.75	14.96	9.87	15.54	10.22	15.52	6.19	13.54	15.21	61.08	24.03	11.6233	11.8767	11.75	33.44	GO:0005975;GO:0080167;GO:0005618;GO:0005773;GO:0030246;GO:000456	BP:carbohydrate metabolic process;BP:response to karrikin;CC:cell wall;CC:vacuole;MF:carbohydrate binding;MF:beta-galactosidase activity;	------	------	------	------	COG1874	G:Carbohydrate transport and metabolism	NP_001234307.2	beta-galactosidase, chloroplastic precursor [Solanum lycopersicum]	sp|Q5N8X6|BGAL3_ORYSJ;	Beta-galactosidase 3 OS=Oryza sativa subsp. japonica OX=39947 GN=Os01g0875500 PE=3 SV=1;	PF01301.21;PF17834.3;PF02140.20;PF02449.17	Glyco_hydro_35;GHD;Gal_Lectin;Glyco_hydro_42	Glycosyl hydrolases family 35;Beta-sandwich domain in beta galactosidase;Galactose binding lectin domain;Beta-galactosidase
gene_Solyc03g020040.3	Solyc03g020040.3	Proteinase inhibitor type-2 (AHRD V3.3 *** A0A2G3AW51_CAPCH)	117.59	79.25	97.5	73.19	162.44	132.26	152.6	34.97	135.52	355.45	762.64	450.62	98.1133	122.63	107.697	522.903	GO:0016021;GO:000486	CC:integral component of membrane;MF:serine-type endopeptidase inhibitor activity;	------	------	------	------	------	------	XP_027771267.1	proteinase inhibitor type-2-like isoform X3 [Solanum pennellii]	sp|Q40561|IP21_TOBAC;	Proteinase inhibitor type-2 OS=Nicotiana tabacum OX=4097 PE=2 SV=1;	PF02428.17	Prot_inhib_II	Potato type II proteinase inhibitor family
gene_Solyc03g025470.5	Solyc03g025470.5	Kinesin-like protein (AHRD V3.11 *** tr|E5GCU2|E5GCU2_CUCME)	1.3	1.32	2.55	0.82	1.5	0.95	1.37	0.86	1.53	1.44	3.15	3	1.72333	1.09	1.25333	2.53	GO:0007018;GO:0005874;GO:0005871;GO:0008017;GO:0003777;GO:0016887;GO:1990939;GO:000552	BP:microtubule-based movement;CC:microtubule;CC:kinesin complex;MF:microtubule binding;MF:microtubule motor activity;MF:ATPase activity;MF:ATP-dependent microtubule motor activity;MF:ATP binding;	K10403	KIF22	------	------	COG5059	Z:Cytoskeleton	XP_004234411.1	kinesin-like protein KIN-10C isoform X2 [Solanum lycopersicum]	sp|F4KEC6|KN10C_ARATH;	Kinesin-like protein KIN-10C OS=Arabidopsis thaliana OX=3702 GN=KIN10C PE=2 SV=1;	PF00225.25;PF16796.7;PF12836.9;PF00633.25	Kinesin;Microtub_bd;HHH_3;HHH	Kinesin motor domain;Microtubule binding;Helix-hairpin-helix motif;Helix-hairpin-helix motif
gene_Solyc03g033835.2	Solyc03g033835.2	AAA-ATPase At3g50940-like (AHRD V3.11 *-* tr|A0A2I4EX93|A0A2I4EX93_9ROSI)	25.17	17.22	21.29	30.73	9.44	14.56	18.12	33.06	12.73	6.79	9.13	5.04	21.2267	18.2433	21.3033	6.98667	GO:0016887;GO:000552	MF:ATPase activity;MF:ATP binding;	K08900	BCS1	------	------	COG0465	O:Posttranslational modification, protein turnover, chaperones	KAG5614277.1	hypothetical protein H5410_014101 [Solanum commersonii]	sp|Q8VZG2|HSR4_ARATH;	Protein HYPER-SENSITIVITY-RELATED 4 OS=Arabidopsis thaliana OX=3702 GN=HSR4 PE=2 SV=1;	PF14363.8	AAA_assoc	Domain associated at C-terminal with AAA
gene_Solyc03g044330.1	Solyc03g044330.1	Acetolactate synthase (AHRD V3.3 *** C0L093_TOBAC)	45.18	53.68	78.16	88.88	121.11	84.15	96.1	73.23	101.7	159.1	244.24	205.73	59.0067	98.0467	90.3433	203.023	GO:0009635;GO:0009099;GO:0009097;GO:0005948;GO:0050660;GO:0000287;GO:0030976;GO:000398	BP:response to herbicide;BP:valine biosynthetic process;BP:isoleucine biosynthetic process;CC:acetolactate synthase complex;MF:flavin adenine dinucleotide binding;MF:magnesium ion binding;MF:thiamine pyrophosphate binding;MF:acetolactate synthase activity;	K01652	E2.2.1.6L, ilvB, ilvG, ilvI	map00660;map00290;map00770;map00650	C5-Branched dibasic acid metabolism;Valine, leucine and isoleucine biosynthesis;Pantothenate and CoA biosynthesis;Butanoate metabolism	COG0028	E:Amino acid transport and metabolism	XP_004234664.1	acetolactate synthase 2, chloroplastic [Solanum lycopersicum]	sp|P09114|ILVB2_TOBAC;	Acetolactate synthase 2, chloroplastic OS=Nicotiana tabacum OX=4097 GN=ALS SURB PE=1 SV=1;	PF02776.20;PF02775.23;PF00205.24	TPP_enzyme_N;TPP_enzyme_C;TPP_enzyme_M	Thiamine pyrophosphate enzyme, N-terminal TPP binding domain;Thiamine pyrophosphate enzyme, C-terminal TPP binding domain;Thiamine pyrophosphate enzyme, central domain
gene_Solyc03g053085.1	Solyc03g053085.1	Ribonuclease 3-like protein 2 (AHRD V3.3 *-* A0A2G3BC36_CAPCH)	0.77	0.94	1.15	0.59	0.39	0.44	0.5	0.28	0.57	7.34	5.23	3.69	0.953333	0.473333	0.45	5.42	GO:0016075;GO:0030422;GO:0006396;GO:0005737;GO:0016021;GO:0005634;GO:0004525;GO:000372	BP:rRNA catabolic process;BP:production of siRNA involved in RNA interference;BP:RNA processing;CC:cytoplasm;CC:integral component of membrane;CC:nucleus;MF:ribonuclease III activity;MF:RNA binding;	------	------	------	------	COG0571	K:Transcription	KAG5615814.1	hypothetical protein H5410_015638, partial [Solanum commersonii]	sp|Q9LTQ0|RTL2_ARATH;	Ribonuclease 3-like protein 2 OS=Arabidopsis thaliana OX=3702 GN=RTL2 PE=1 SV=1;	PF00636.28;PF14622.8	Ribonuclease_3;Ribonucleas_3_3	Ribonuclease III domain;Ribonuclease-III-like
gene_Solyc03g078360.1	Solyc03g078360.1	Receptor-like protein kinase (AHRD V3.3 *** A0A2U1PPA0_ARTAN)	8.49	5.22	5.44	9.34	5.47	6.27	6.42	11.66	5.57	3.69	3.45	2.2	6.38333	7.02667	7.88333	3.11333	GO:0006468;GO:0048544;GO:0016021;GO:0030246;GO:0005524;GO:0004672;GO:0106310;GO:010631	BP:protein phosphorylation;BP:recognition of pollen;CC:integral component of membrane;MF:carbohydrate binding;MF:ATP binding;MF:protein kinase activity;MF:old GO;MF:old GO;	------	------	------	------	COG0515	T:Signal transduction mechanisms	XP_004235072.1	G-type lectin S-receptor-like serine/threonine-protein kinase LECRK1 [Solanum lycopersicum]	sp|Q7FAZ3|LERK1_ORYSJ;	G-type lectin S-receptor-like serine/threonine-protein kinase LECRK1 OS=Oryza sativa subsp. japonica OX=39947 GN=LECRK1 PE=2 SV=1;	PF07714.19;PF00069.27;PF01453.26;PF00954.22	PK_Tyr_Ser-Thr;Pkinase;B_lectin;S_locus_glycop	Protein tyrosine and serine/threonine kinase;Protein kinase domain;D-mannose binding lectin;S-locus glycoprotein domain
gene_Solyc03g078490.5	Solyc03g078490.5	Glycosyltransferase (AHRD V3.11 *** tr|A0A2I4HTK4|A0A2I4HTK4_9ROSI)	39.58	23.78	21.11	29.66	5.08	18.99	16.06	21.07	14.49	6.56	7.69	3.8	28.1567	17.91	17.2067	6.01667	GO:0009718;GO:0080043;GO:0008194;GO:0047213;GO:008004	BP:anthocyanin-containing compound biosynthetic process;MF:quercetin 3-O-glucosyltransferase activity;MF:UDP-glycosyltransferase activity;MF:anthocyanidin 3-O-glucosyltransferase activity;MF:quercetin 7-O-glucosyltransferase activity;	------	------	------	------	COG1819	S:Function unknown	XP_004235065.1	linamarin synthase 1-like [Solanum lycopersicum]	sp|G3FIN8|UGTK4_MANES;	Linamarin synthase 1 OS=Manihot esculenta OX=3983 GN=UGT85K4 PE=1 SV=1;	PF00201.20	UDPGT	UDP-glucoronosyl and UDP-glucosyl transferase
gene_Solyc03g080020.4	Solyc03g080020.4	Major facilitator superfamily domain, general substrate transporter (AHRD V3.3 *-* A0A0A2K2T0_PENEN)	18.51	19.89	15.9	12.14	7.76	14.18	11.82	15.66	12.21	5.01	7.06	4.54	18.1	11.36	13.23	5.53667	GO:0006817;GO:001602	BP:phosphate ion transport;CC:integral component of membrane;	------	------	------	------	ENOG410ZITE	S:Function unknown	XP_004235041.1	UNC93-like protein 1 [Solanum lycopersicum]	sp|Q56WD3|UN931_ARATH;	UNC93-like protein 1 OS=Arabidopsis thaliana OX=3702 GN=At1g18000 PE=2 SV=2;	------	------	------
gene_Solyc03g080190.3	Solyc03g080190.3	2-oxoglutarate (2OG) and Fe(II)-dependent oxygenase superfamily protein (AHRD V3.3 *** A0A2U1QGX7_ARTAN)	9.99	9.06	11.6	43.98	25.14	37.39	32.28	41.71	18.56	12.82	16.59	14.05	10.2167	35.5033	30.85	14.4867	GO:0055114;GO:0031418;GO:0046872;GO:0051213;GO:001649	BP:oxidation-reduction process;MF:L-ascorbic acid binding;MF:metal ion binding;MF:dioxygenase activity;MF:oxidoreductase activity;	K24028	DMR6, DLO	------	------	COG3491	S:Function unknown	NP_001233840.2	protein DMR6-like oxygenase [Solanum lycopersicum]	sp|Q9FLV0|DMR6_ARATH;	Protein DOWNY MILDEW RESISTANCE 6 OS=Arabidopsis thaliana OX=3702 GN=DMR6 PE=1 SV=1;	PF03171.22;PF14226.8	2OG-FeII_Oxy;DIOX_N	2OG-F;non-haem dioxygenase in morphine synthesis N-terminal
gene_Solyc03g081270.2	Solyc03g081270.2	Two-component response regulator-like APRR9 (AHRD V3.3 *-* A0A1U8G692_CAPAN)	0	0	0.35	0.07	0.28	0	0.31	0	0.31	4.58	3.4	1.6	0.116667	0.116667	0.206667	3.19333	GO:0048511;GO:0000160;GO:0005634;GO:0004252;GO:000551	BP:rhythmic process;BP:phosphorelay signal transduction system;CC:nucleus;MF:serine-type endopeptidase activity;MF:protein binding;	K12130	PRR5	map04712	Circadian rhythm - plant	COG5641	K:Transcription	TMW83190.1	hypothetical protein EJD97_002537 [Solanum chilense]	sp|Q6LA42|APRR5_ARATH;	Two-component response regulator-like APRR5 OS=Arabidopsis thaliana OX=3702 GN=APRR5 PE=1 SV=2;	PF06203.16;PF00082.24	CCT;Peptidase_S8	CCT motif;Subtilase family
gene_Solyc03g082430.1	Solyc03g082430.1	Growth-regulating factor 5 (AHRD V3.3 *** A0A2G3A035_CAPAN)	0	0.05	0.35	0.06	0.26	0.11	0.35	0.06	0.51	0.3	10.36	1.71	0.133333	0.143333	0.306667	4.12333	GO:0032502;GO:0006355;GO:0006351;GO:0005634;GO:000552	BP:developmental process;BP:regulation of transcription, DNA-templated;BP:transcription, DNA-templated;CC:nucleus;MF:ATP binding;	------	------	------	------	ENOG4111821	K:Transcription	XP_010318056.1	growth-regulating factor 3-like [Solanum lycopersicum]	sp|Q9FJB8|GRF7_ARATH;	Growth-regulating factor 7 OS=Arabidopsis thaliana OX=3702 GN=GRF7 PE=2 SV=1;	PF08879.12;PF08880.13	WRC;QLQ	WRC;QLQ
gene_Solyc03g082805.1	Solyc03g082805.1	Unknown protein	1.94	1.91	2.75	1.31	1.88	0.89	0.9	1.14	1.27	2.28	6.77	3.93	2.2	1.36	1.10333	4.32667	------	------	------	------	------	------	------	------	------	------	------	------	------	------	------
gene_Solyc03g083440.4	Solyc03g083440.4	Glutamate synthase (AHRD V3.3 *** A0A2U1PKW7_ARTAN)	3.71	3.16	6.12	4.79	10.36	3.39	5.19	2.34	8.77	12.51	23.35	20.83	4.33	6.18	5.43333	18.8967	GO:0019676;GO:0048589;GO:0097054;GO:0006541;GO:0006537;GO:0046686;GO:0055114;GO:0009570;GO:0015930;GO:0050660;GO:0051538;GO:0016040;GO:0010181;GO:0005506;GO:001649	BP:ammonia assimilation cycle;BP:developmental growth;BP:L-glutamate biosynthetic process;BP:glutamine metabolic process;BP:glutamate biosynthetic process;BP:response to cadmium ion;BP:oxidation-reduction process;CC:chloroplast stroma;MF:glutamate synthase activity;MF:flavin adenine dinucleotide binding;MF:3 iron, 4 sulfur cluster binding;MF:glutamate synthas;MF:FMN binding;MF:iron ion binding;MF…	K00264	GLT1	map00250;map00910	Alanine, aspartate and glutamate metabolism;Nitrogen metabolism	COG0067	E:Amino acid transport and metabolism	XP_004234955.1	glutamate synthase 1 [NADH], chloroplastic isoform X1 [Solanum lycopersicum]	sp|Q9LV03|GLUT1_ARATH;	Glutamate synthase 1 [NADH], chloroplastic OS=Arabidopsis thaliana OX=3702 GN=GLT1 PE=1 SV=2;	PF00310.23;PF01645.19;PF04898.16;PF01493.21;PF07992.16;PF14691.8;PF13450.8;PF00070.29;PF01266.26;PF01593.26;PF12831.9	GATase_2;Glu_synthase;Glu_syn_central;GXGXG;Pyr_redox_2;Fer4_20;NAD_binding_8;Pyr_redox;DAO;Amino_oxidase;FAD_oxidored	Glutamine amidotransferases class-II;Conserved region in glutamate synthase;Glutamate synthase central domain;GXGXG motif;Pyridine nucleotide-disulphide oxidoreductase;Dihydroprymidine dehydrogenase domain II, 4Fe-4S cluster;NA;Pyridine nucleotide-disulphide oxidoreductase;FAD dependent oxidoreductase;Flavin containing amine oxidoreductase;FAD dependent oxidoreductase
gene_Solyc03g083970.3	Solyc03g083970.3	BAG family molecular chaperone regulator 7-like (AHRD V3.3 *** A0A2I4H718_9ROSI)	32.41	33.41	64.19	62.6	66.49	48.11	42.36	27.66	41.62	77.49	179.96	112.32	43.3367	59.0667	37.2133	123.257	GO:0006457;GO:0034605;GO:0070417;GO:0034620;GO:0005783;GO:0005886;GO:0009506;GO:005108	BP:protein folding;BP:cellular response to heat;BP:cellular response to cold;BP:cellular response to unfolded protein;CC:endoplasmic reticulum;CC:plasma membrane;CC:plasmodesma;MF:chaperone binding;	------	------	------	------	ENOG410YFGU	S:Function unknown	XP_004234927.1	BAG family molecular chaperone regulator 7 [Solanum lycopersicum]	sp|Q9LVA0|BAG7_ARATH;	BAG family molecular chaperone regulator 7 OS=Arabidopsis thaliana OX=3702 GN=BAG7 PE=1 SV=1;	PF02179.18	BAG	BAG domain
gene_Solyc03g093890.3	Solyc03g093890.3	R2R3MYB transcription factor 52	6.56	4.28	2.62	9.29	4.07	4.51	8	13.1	3.21	2.43	2.37	1.6	4.48667	5.95667	8.10333	2.13333	GO:000563	CC:nucleus;	K09422	MYBP	------	------	COG5147	K:Transcription	NP_001333764.1	R2R3MYB transcription factor 52 [Solanum lycopersicum]	sp|Q9SJX8|MYB14_ARATH;	Transcription factor MYB14 OS=Arabidopsis thaliana OX=3702 GN=MYB14 PE=2 SV=1;	PF00249.33;PF13921.8	Myb_DNA-binding;Myb_DNA-bind_6	Myb-like DNA-binding domain;Myb-like DNA-binding domain
gene_Solyc03g095600.1	Solyc03g095600.1	KIP1-like (AHRD V3.3 *-* A0A200R3P8_9MAGN)	6.62	5.93	11.97	6.02	8.32	4.56	10.4	3.79	9.19	10.55	22.1	17.56	8.17333	6.3	7.79333	16.7367	GO:0005774;GO:000377	CC:vacuolar membrane;MF:actin binding;	------	------	------	------	ENOG41117CB	S:Function unknown	XP_004235221.1	protein NETWORKED 4B [Solanum lycopersicum]	sp|F4KEW8|NET4A_ARATH;	Protein NETWORKED 4A OS=Arabidopsis thaliana OX=3702 GN=NET4A PE=2 SV=1;	PF10186.11	ATG14	Vacuolar sorting 38 and autophagy-related subunit 14
gene_Solyc03g095650.3	Solyc03g095650.3	MLO-like protein (AHRD V3.3 *** K4BIY8_SOLLC)	4.1	5.89	3.42	5.66	3.88	7.81	6.84	10.96	3.87	0.14	0.4	0.26	4.47	5.78333	7.22333	0.266667	GO:0006952;GO:0009607;GO:0016021;GO:000551	BP:defense response;BP:response to biotic stimulus;CC:integral component of membrane;MF:calmodulin binding;	K08472	MLO	------	------	ENOG410ZUVB	D:Cell cycle control, cell division, chromosome partitioning	XP_004235223.1	MLO-like protein 2 isoform X1 [Solanum lycopersicum]	sp|Q94KB7|MLO6_ARATH;	MLO-like protein 6 OS=Arabidopsis thaliana OX=3702 GN=MLO6 PE=2 SV=2;	PF03094.17	Mlo	Mlo family
gene_Solyc03g096890.3	Solyc03g096890.3	Serine/threonine-protein kinase TIO (AHRD V3.3 *** A0A1U8FYB3_CAPAN)	1.52	1.92	2.79	1.35	3.01	1.32	2.23	0.98	2.65	2.76	5.97	5.35	2.07667	1.89333	1.95333	4.69333	GO:0000911;GO:0007112;GO:0009558;GO:0006468;GO:0005737;GO:0009524;GO:0019894;GO:0004672;GO:000552	BP:cytokinesis by cell plate formation;BP:male meiosis cytokinesis;BP:embryo sac cellularization;BP:protein phosphorylation;CC:cytoplasm;CC:phragmoplast;MF:kinesin binding;MF:protein kinase activity;MF:ATP binding;	K06228	FU	------	------	ENOG410XRQ6	T:Signal transduction mechanisms	XP_010318270.1	serine/threonine-protein kinase TIO isoform X1 [Solanum lycopersicum]	sp|Q2QAV0|TIO_ARATH;	Serine/threonine-protein kinase TIO OS=Arabidopsis thaliana OX=3702 GN=TIO PE=1 SV=1;	PF00069.27;PF07714.19;PF03109.18;PF14531.8;PF17667.3	Pkinase;PK_Tyr_Ser-Thr;ABC1;Kinase-like;Pkinase_fungal	Protein kinase domain;Protein tyrosine and serine/threonine kinase;ABC1 atypical kinase-like domain;Kinase-like;Fungal protein kinase
gene_Solyc03g097600.4	Solyc03g097600.4	Bidirectional sugar transporter SWEET (AHRD V3.11 *** tr|M1D4D4|M1D4D4_SOLTU)	131.34	117.59	117.8	185.93	74.51	153.02	105.66	178.07	131.66	77.64	66.83	47.61	122.243	137.82	138.463	64.0267	GO:0008643;GO:0016021;GO:0005886;GO:005111	BP:carbohydrate transport;CC:integral component of membrane;CC:plasma membrane;MF:sugar transmembrane transporter activity;	K15382	SLC50A, SWEET	------	------	ENOG4111M4R	U:Intracellular trafficking, secretion, and vesicular transport	KAG5617550.1	hypothetical protein H5410_017374 [Solanum commersonii]	sp|Q9LUE3|SWT10_ARATH;	Bidirectional sugar transporter SWEET10 OS=Arabidopsis thaliana OX=3702 GN=SWEET10 PE=1 SV=1;	PF03083.18	MtN3_slv	Sugar efflux transporter for intercellular exchange
gene_Solyc03g098700.1	Solyc03g098700.1	Cysteine protease inhibitor.1	0	0.11	0.08	0	0.12	0	0.12	0	0	0.55	1.07	1.59	0.063333	0.04	0.04	1.07	GO:0005773;GO:0004869;GO:000486	CC:vacuole;MF:cysteine-type endopeptidase inhibitor activity;MF:endopeptidase inhibitor activity;	------	------	------	------	------	------	XP_004235410.1	cysteine protease inhibitor 10 [Solanum lycopersicum]	sp|O24384|CPI8_SOLTU;	Cysteine protease inhibitor 8;	PF00197.20	Kunitz_legume	Trypsin and protease inhibitor
gene_Solyc03g098720.3	Solyc03g098720.3	Kunitz trypsin inhibitor (AHRD V3.3 *** Q39869_SOYBN)	0.17	0.67	0.23	1.1	5.72	0.69	0.67	0	0.88	7.86	10.19	35.01	0.356667	2.50333	0.516667	17.6867	GO:000486	MF:endopeptidase inhibitor activity;	------	------	------	------	ENOG410YHN1	O:Posttranslational modification, protein turnover, chaperones	XP_019068552.1	kunitz-type serine protease inhibitor DrTI-like [Solanum lycopersicum]	sp|P13087|MIRA_SYNDU;	Miraculin OS=Synsepalum dulcificum OX=3743 PE=1 SV=3;	PF00197.20	Kunitz_legume	Trypsin and protease inhibitor
gene_Solyc03g098780.2	Solyc03g098780.2	Aspartic protease inhibitor.1	81.89	161.72	225.33	580.36	1555.74	641.98	605.64	460.59	1582.56	5038.87	2817.68	6096.2	156.313	926.027	882.93	4650.92	GO:0005773;GO:0019828;GO:0004866;GO:000486	CC:vacuole;MF:aspartic-type endopeptidase inhibitor activity;MF:endopeptidase inhibitor activity;MF:serine-type endopeptidase inhibitor activity;	------	------	------	------	------	------	XP_004235413.1	aspartic protease inhibitor 1 [Solanum lycopersicum]	sp|Q41480|API1_SOLTU;	Aspartic protease inhibitor 1 OS=Solanum tuberosum OX=4113 PE=1 SV=2;	PF00197.20	Kunitz_legume	Trypsin and protease inhibitor
gene_Solyc03g098790.3	Solyc03g098790.3	cathepsin D inhibitor protein	26.31	192.52	96.13	581.01	2705.01	761.32	1087.86	242.18	2453.8	7740.35	4178.07	9696.98	104.987	1349.11	1261.28	7205.13	GO:0005773;GO:0019828;GO:0004866;GO:000486	CC:vacuole;MF:aspartic-type endopeptidase inhibitor activity;MF:endopeptidase inhibitor activity;MF:serine-type endopeptidase inhibitor activity;	------	------	------	------	------	------	NP_001234142.2	cathepsin D inhibitor protein precursor [Solanum lycopersicum]	sp|P17979|API8_SOLTU;	Aspartic protease inhibitor 8 OS=Solanum tuberosum OX=4113 PE=2 SV=1;	PF00197.20	Kunitz_legume	Trypsin and protease inhibitor
gene_Solyc03g111790.4	Solyc03g111790.4	Centromere protein X (AHRD V3.3 *** A0A1U8FY32_CAPAN)	23.31	18.7	19.08	33.95	21.67	34.33	25.63	45.23	19.49	11.64	14.13	9.57	20.3633	29.9833	30.1167	11.78	GO:0051382;GO:0006281;GO:0000712;GO:0007129;GO:0031297;GO:0043240;GO:0071821;GO:000367	BP:kinetochore assembly;BP:DNA repair;BP:resolution of meiotic recombination intermediates;BP:synapsis;BP:replication fork processing;CC:Fanconi anaemia nuclear complex;CC:FANCM-MHF complex;MF:DNA binding;	K15360	STRA13, CENPX, MHF2	------	------	ENOG410XYKN	S:Function unknown	XP_004236296.1	protein MHF2 homolog [Solanum lycopersicum]	sp|Q8L7N3|CENPX_ARATH;	Protein MHF2 homolog OS=Arabidopsis thaliana OX=3702 GN=MHF2 PE=3 SV=1;	PF09415.12	CENP-X	CENP-S associating Centromere protein X
gene_Solyc03g112590.4	Solyc03g112590.4	Cell division cycle protein 48-like protein (AHRD V3.3 *** A0A2G3CYA7_CAPCH)	0.36	0.12	0.17	0.07	0.26	0.17	0.17	0.03	0.2	0.09	8.19	0.42	0.216667	0.166667	0.133333	2.9	GO:0030433;GO:0030970;GO:0051228;GO:0071712;GO:0051301;GO:0097352;GO:0005829;GO:0034098;GO:0005634;GO:0016787;GO:0016887;GO:0031593;GO:000552	BP:ER-associated ubiquitin-dependent protein catabolic process;BP:retrograde protein transport, ER to cytosol;BP:mitotic spindle disassembly;BP:ER-associated misfolded protein catabolic process;BP:cell division;BP:autophagosome maturation;CC:cytosol;CC:VCP-NPL4-UFD1 AAA ATPase complex;CC:nucleus;MF:hydrolase activity;MF:ATPase activity;MF:polyubiquitin binding;MF:ATP binding;	K13525	VCP, CDC48	map04141	Protein processing in endoplasmic reticulum	COG0464	O:Posttranslational modification, protein turnover, chaperones	XP_004236235.1	cell division cycle protein 48 homolog isoform X1 [Solanum lycopersicum]	sp|P54774|CDC48_SOYBN;	Cell division cycle protein 48 homolog OS=Glycine max OX=3847 GN=CDC48 PE=2 SV=1;	PF00004.31;PF17862.3;PF02359.20;PF05496.14;PF02933.19;PF13191.8;PF07724.16;PF13671.8;PF07728.16;PF01443.20;PF09336.12	AAA;AAA_lid_3;CDC48_N;RuvB_N;CDC48_2;AAA_16;AAA_2;AAA_33;AAA_5;Viral_helicase1;Vps4_C	ATPase family associated with various cellular activities;AAA+ lid domain;Cell division protein 48;Holliday junction DNA helicase RuvB P-loop domain;Cell division protein 48;AAA ATPase domain;AAA domain;AAA domain;AAA domain;Viral;Vps4 C terminal oligomerisation domain
gene_Solyc03g114175.1	Solyc03g114175.1	Glycosyltransferase (AHRD V3.3 *** A0A2U1M9M1_ARTAN)	1	0.47	0.86	0.83	1.52	1.8	1.74	0.52	1.48	2.82	13.52	3.97	0.776667	1.38333	1.24667	6.77	GO:0016758;GO:000819	MF:transferase activity, transferring hexosyl groups;MF:UDP-glycosyltransferase activity;	------	------	------	------	COG1819	S:Function unknown	XP_004236114.1	UDP-glycosyltransferase 90A1-like [Solanum lycopersicum]	sp|Q9ZVX4|U90A1_ARATH;	UDP-glycosyltransferase 90A1 OS=Arabidopsis thaliana OX=3702 GN=UGT90A1 PE=2 SV=1;	PF00201.20	UDPGT	UDP-glucoronosyl and UDP-glucosyl transferase
gene_Solyc03g114530.5	Solyc03g114530.5	Strictosidine synthase (AHRD V3.11 *** tr|A0A346A6F4|A0A346A6F4_GELSE)	0.2	0	0.23	0	0.19	0.06	0.14	0	0.11	2.77	0.82	2.6	0.143333	0.083333	0.083333	2.06333	GO:0009058;GO:0005773;GO:001684	BP:biosynthetic process;CC:vacuole;MF:strictosidine synthase activity;	------	------	------	------	COG3386	G:Carbohydrate transport and metabolism	XP_004236090.1	protein STRICTOSIDINE SYNTHASE-LIKE 11-like [Solanum lycopersicum]	sp|P92976|SSL11_ARATH;	Protein STRICTOSIDINE SYNTHASE-LIKE 11 OS=Arabidopsis thaliana OX=3702 GN=SSL11 PE=2 SV=2;	PF03088.18;PF08450.14;PF20067.1	Str_synth;SGL;APMAP_N	Strictosidine synthase;SMP-30/Gluconolactonase/LRE-like region;Adipocyte plasma membrane-associated protein-like, N-terminal
gene_Solyc03g116730.5	Solyc03g116730.5	Palmitoyl-monogalactosyldiacylglycerol delta-7 desaturase, chloroplastic (AHRD V3.11 *** tr|A0A2G2WQQ5|A0A2G2WQQ5_CAPBA)	5.27	5.27	6.54	7.28	7.22	6.3	10.96	5.47	7.17	17.16	13.97	19.07	5.69333	6.93333	7.86667	16.7333	GO:0006633;GO:0010205;GO:0006636;GO:0006629;GO:0005789;GO:0016021;GO:0009979;GO:001671	BP:fatty acid biosynthetic process;BP:photoinhibition;BP:unsaturated fatty acid biosynthetic process;BP:lipid metabolic process;CC:endoplasmic reticulum membrane;CC:integral component of membrane;MF:1;MF:oxidoreductase activity, acting on paired donors, with oxidation of a pair of donors resulting in the reduction of molecular oxygen to two molecules of water;	K20416	FAD5	------	------	COG1398	I:Lipid transport and metabolism	XP_004235954.1	palmitoyl-monogalactosyldiacylglycerol delta-7 desaturase, chloroplastic [Solanum lycopersicum]	sp|Q949X0|ADS3_ARATH;	Palmitoyl-monogalactosyldiacylglycerol delta-7 desaturase, chloroplastic OS=Arabidopsis thaliana OX=3702 GN=ADS3 PE=1 SV=2;	PF00487.26	FA_desaturase	Fatty acid desaturase
gene_Solyc03g116930.3	Solyc03g116930.3	Phospholipase-like protein (AHRD V3.3 *** A0A2U1PUP4_ARTAN)	6.89	7.81	8.18	3.96	4.37	5.43	7.54	9.2	8.98	1.56	2.3	1.19	7.62667	4.58667	8.57333	1.68333	GO:0007064;GO:0051301;GO:0006281;GO:0005634;GO:000078	BP:mitotic sister chromatid cohesion;BP:cell division;BP:DNA repair;CC:nucleus;CC:chromatin;	------	------	------	------	ENOG410XQW7	S:Function unknown	XP_015067614.1	uncharacterized protein LOC107012321 isoform X1 [Solanum pennellii]	sp|Q04264|PDS5_YEAST;	Sister chromatid cohesion protein PDS5 OS=Saccharomyces cerevisiae;	PF05278.14	PEARLI-4	Arabidopsis phospholipase-like protein
gene_Solyc03g116950.2	Solyc03g116950.2	Phospholipase-like protein (AHRD V3.3 *-* A0A2U1KY47_ARTAN)	1.67	1.6	3.74	0.75	0.74	1.46	0.95	1.16	1.49	0.11	0.33	0.15	2.33667	0.983333	1.2	0.196667	GO:0007064;GO:000563	BP:mitotic sister chromatid cohesion;CC:nucleus;	------	------	------	------	ENOG410XQW7;ENOG410Z5M3	S:Function unknown;	XP_019068662.1	uncharacterized protein LOC101253990 [Solanum lycopersicum]	------	------	PF05278.14;PF12718.9	PEARLI-4;Tropomyosin_1	Arabidopsis phospholipase-like protein;Tropomyosin like
gene_Solyc03g117630.1	Solyc03g117630.1	Heat shock 70 kDa protein (AHRD V3.3 *** A0A1U8FVW2_CAPAN)	3.24	4.36	3.77	4.61	4.55	4.35	4.97	3.17	4.47	16.56	6.35	6.63	3.79	4.50333	4.20333	9.84667	GO:0034620;GO:0051085;GO:0042026;GO:0005737;GO:0005788;GO:0031072;GO:0032440;GO:0044183;GO:0051082;GO:0051787;GO:0016887;GO:000552	BP:cellular response to unfolded protein;BP:chaperone mediated protein folding requiring cofactor;BP:protein refolding;CC:cytoplasm;CC:endoplasmic reticulum lumen;MF:heat shock protein binding;MF:2-alkenal reductase [NA;MF:protein binding involved in protein folding;MF:unfolded protein binding;MF:misfolded protein binding;MF:ATPase activity;MF:ATP binding;	K03283	HSPA1s	map04144;map04141;map03040	Endocytosis;Protein processing in endoplasmic reticulum;Spliceosome	COG0443	O:Posttranslational modification, protein turnover, chaperones	XP_010318701.1	heat shock 70 kDa protein 5 [Solanum lycopersicum]	sp|P09189|HSP7C_PETHY;	Heat shock cognate 70 kDa protein OS=Petunia hybrida OX=4102 GN=HSP70 PE=2 SV=1;	PF00012.22;PF06723.15	HSP70;MreB_Mbl	Hsp70 protein;MreB/Mbl protein
gene_Solyc03g117870.3	Solyc03g117870.3	4-coumarate:CoA ligase (AHRD V3.3 *** Q42879_LITER)	24.87	25.31	26.02	42.95	58.69	22.73	43.64	27.81	66.27	96.73	92.03	127.09	25.4	41.4567	45.9067	105.283	GO:0033494;GO:0009800;GO:0009803;GO:0106286;GO:0052315;GO:0007623;GO:0009698;GO:0005829;GO:0016207;GO:0050563;GO:0018858;GO:0106290;GO:0016405;GO:0003824;GO:000552	BP:ferulate metabolic process;BP:cinnamic acid biosynthetic process;BP:cinnamic acid metabolic process;BP:old GO;BP:phytoalexin biosynthetic process;BP:circadian rhythm;BP:phenylpropanoid metabolic process;CC:cytosol;MF:4-coumarate-CoA ligase activity;MF:trans-feruloyl-CoA synthase activity;MF:benzoate-CoA ligase activity;MF:old GO;MF:CoA-ligase activity;MF:catalytic activity;MF:ATP binding;	K01904	4CL	map00130;map00940	Ubiquinone and other terpenoid-quinone biosynthesis;Phenylpropanoid biosynthesis	COG0318;COG0318	I:Lipid transport and metabolism;Q:Secondary metabolites biosynthesis, transport and catabolism	NP_001333770.1	4-coumarate--CoA ligase [Solanum lycopersicum]	sp|P31684|4CL1_SOLTU;	4-coumarate--CoA ligase 1 OS=Solanum tuberosum OX=4113 GN=4CL1 PE=3 SV=1;	PF00501.30;PF13193.8	AMP-binding;AMP-binding_C	AMP-binding enzyme;AMP-binding enzyme C-terminal domain
gene_Solyc03g118470.4	Solyc03g118470.4	Nudix hydrolase 4 (AHRD V3.3 *** A0A2G3CZQ7_CAPCH)	25.99	30.87	28.86	45.01	28.71	21.26	40.09	42.33	37.96	117.21	79.39	71.28	28.5733	31.66	40.1267	89.2933	GO:0005737;GO:0005634;GO:001678	CC:cytoplasm;CC:nucleus;MF:hydrolase activity;	K07766	E3.6.1.52	------	------	COG0494	L:Replication, recombination and repair	XP_010318659.1	nudix hydrolase 18, mitochondrial isoform X2 [Solanum lycopersicum]	sp|Q9ZU95|NUD17_ARATH;	Nudix hydrolase 17, mitochondrial OS=Arabidopsis thaliana OX=3702 GN=NUDT17 PE=2 SV=1;	PF00293.30	NUDIX	NUDIX domain
gene_Solyc03g120110.3	Solyc03g120110.3	Lectin protein kinase family protein (AHRD V3.3 *** A0A1I9LPL5_ARATH)	2.53	2.44	1.52	4.33	1.71	3.8	2.77	4.5	1.92	1.16	1.11	0.66	2.16333	3.28	3.06333	0.976667	GO:0006468;GO:0046777;GO:0106311;GO:0106310;GO:0016021;GO:0005886;GO:0004672;GO:0030246;GO:0004674;GO:000552	BP:protein phosphorylation;BP:protein autophosphorylation;BP:old GO;BP:old GO;CC:integral component of membrane;CC:plasma membrane;MF:protein kinase activity;MF:carbohydrate binding;MF:protein serine/threonine kinase activity;MF:ATP binding;	------	------	------	------	COG0515	T:Signal transduction mechanisms	XP_004236409.1	G-type lectin S-receptor-like serine/threonine-protein kinase CES101 [Solanum lycopersicum]	sp|Q9LW83|CE101_ARATH;	G-type lectin S-receptor-like serine/threonine-protein kinase CES101 OS=Arabidopsis thaliana OX=3702 GN=CES101 PE=2 SV=2;	PF07714.19;PF00069.27;PF01453.26;PF08276.13;PF11883.10	PK_Tyr_Ser-Thr;Pkinase;B_lectin;PAN_2;DUF3403	Protein tyrosine and serine/threonine kinase;Protein kinase domain;D-mannose binding lectin;PAN-like domain;Domain of unknown function
gene_Solyc03g120990.3	Solyc03g120990.3	Malic enzyme (AHRD V3.3 *** A0A2G3D1G2_CAPCH)	0.49	0.35	0.37	0.63	0.5	0.38	0.87	0.54	0.61	2.68	4.48	1.64	0.403333	0.503333	0.673333	2.93333	GO:0006090;GO:0006108;GO:0055114;GO:0009507;GO:0004473;GO:0051287;GO:0004471;GO:0004470;GO:004687	BP:pyruvate metabolic process;BP:malate metabolic process;BP:oxidation-reduction process;CC:chloroplast;MF:malate dehydrogenas;MF:NAD binding;MF:malate dehydrogenas;MF:malic enzyme activity;MF:metal ion binding;	K00029	E1.1.1.40, maeB	map00620;map00710	Pyruvate metabolism;Carbon fixation in photosynthetic organisms	COG0281	C:Energy production and conversion	XP_004235645.1	NADP-dependent malic enzyme, chloroplastic [Solanum lycopersicum]	sp|P36444|MAOC_FLAPR;	NADP-dependent malic enzyme, chloroplastic OS=Flaveria pringlei OX=4226 GN=MODA PE=2 SV=1;	PF03949.17;PF00390.21	Malic_M;malic	Malic enzyme, NAD binding domain;Malic enzyme, N-terminal domain
gene_Solyc04g005610.3	Solyc04g005610.3	NAC domain-containing protein 2 (AHRD V3.3 *** NAP2_SOLLC)	5.6	10.3	4.23	5.16	1.57	4.7	2.61	3.69	2.48	0.64	0.84	0.19	6.71	3.81	2.92667	0.556667	GO:0006355;GO:000367	BP:regulation of transcription, DNA-templated;MF:DNA binding;	------	------	------	------	ENOG410YB53	K:Transcription	NP_001352326.1	NAC domain-containing protein 2 [Solanum lycopersicum]	sp|K4BNG7|NAP2_SOLLC;	NAC domain-containing protein 2 OS=Solanum lycopersicum OX=4081 GN=NAP2 PE=2 SV=1;	PF02365.17	NAM	No apical meristem
gene_Solyc04g006930.3	Solyc04g006930.3	Protein kinase family protein (AHRD V3.3 *-* E5GBJ3_CUCME)	0.64	0.9	0.43	0.78	1.02	0.96	0.9	0.32	0.78	1.32	3.29	1.59	0.656667	0.92	0.666667	2.06667	GO:0006468;GO:0016021;GO:0005886;GO:0004672;GO:0004674;GO:0005509;GO:000552	BP:protein phosphorylation;CC:integral component of membrane;CC:plasma membrane;MF:protein kinase activity;MF:protein serine/threonine kinase activity;MF:calcium ion binding;MF:ATP binding;	------	------	------	------	COG5126;COG5126;COG5126;COG0515	D:Cell cycle control, cell division, chromosome partitioning;T:Signal transduction mechanisms;Z:Cytoskeleton;T:Signal transduction mechanisms	XP_019068789.1	proline-rich receptor-like protein kinase PERK9 isoform X3 [Solanum lycopersicum]	sp|Q9C660|PEK10_ARATH;	Proline-rich receptor-like protein kinase PERK10 OS=Arabidopsis thaliana OX=3702 GN=PERK10 PE=1 SV=2;	PF07714.19;PF00069.27;PF00036.34;PF13499.8;PF13405.8;PF13202.8;PF13833.8;PF17667.3	PK_Tyr_Ser-Thr;Pkinase;EF-hand_1;EF-hand_7;EF-hand_6;EF-hand_5;EF-hand_8;Pkinase_fungal	Protein tyrosine and serine/threonine kinase;Protein kinase domain;EF hand;EF-hand domain pair;EF-hand domain;EF hand;EF-hand domain pair;Fungal protein kinase
gene_Solyc04g007210.3	Solyc04g007210.3	Zinc finger protein CONSTANS-LIKE 7 (AHRD V3.3 *** A0A2G2VK65_CAPBA)	59.64	69.72	54.98	61.11	39.89	64	35.15	43.08	36.87	17.53	13.4	14.15	61.4467	55	38.3667	15.0267	GO:0006355;GO:0005634;GO:0008270;GO:000551	BP:regulation of transcription, DNA-templated;CC:nucleus;MF:zinc ion binding;MF:protein binding;	------	------	------	------	COG5641	K:Transcription	XP_004236986.1	zinc finger protein CONSTANS-LIKE 16 [Solanum lycopersicum]	sp|Q8RWD0|COL16_ARATH;	Zinc finger protein CONSTANS-LIKE 16 OS=Arabidopsis thaliana OX=3702 GN=COL16 PE=1 SV=2;	PF06203.16;PF00643.26	CCT;zf-B_box	CCT motif;B-box zinc finger
gene_Solyc04g007320.3	Solyc04g007320.3	Disease resistance protein (TIR-NBS-LRR class) (AHRD V3.3 *** A0A2U1PW75_ARTAN)	9.21	7.91	7.84	19.07	9.78	12.14	12.41	17.7	10.43	7.05	4.91	3.22	8.32	13.6633	13.5133	5.06	GO:0006952;GO:0007165;GO:0016787;GO:004353	BP:defense response;BP:signal transduction;MF:hydrolase activity;MF:ADP binding;	------	------	------	------	COG4886	S:Function unknown	XP_004237202.1	TMV resistance protein N-like [Solanum lycopersicum]	sp|A0A290U7C4|ROQ1_NICBE;	Disease resistance protein Roq1 OS=Nicotiana benthamiana OX=4100 GN=ROQ1 PE=1 SV=1;	PF01582.22;PF00931.24;PF20160.1;PF13676.8;PF12799.9;PF13855.8;PF13191.8;PF05729.14;PF13401.8	TIR;NB-ARC;C-JID;TIR_2;LRR_4;LRR_8;AAA_16;NACHT;AAA_22	TIR domain;NB-ARC domain;C-JID domain;TIR domain;Leucine Rich repeats;Leucine rich repeat;AAA ATPase domain;NACHT domain;AAA domain
gene_Solyc04g007500.1	Solyc04g007500.1	RING-H2 finger protein 2B (AHRD V3.3 *** A0A2U1PWM9_ARTAN)	47.08	64.62	50.44	66.36	38.96	52.27	53.78	60.06	39.39	23.58	23.42	18.95	54.0467	52.53	51.0767	21.9833	GO:0016567;GO:0016021;GO:006163	BP:protein ubiquitination;CC:integral component of membrane;MF:ubiquitin protein ligase activity;	K16282	RHA2	------	------	ENOG41121N2	O:Posttranslational modification, protein turnover, chaperones	TMW90689.1	hypothetical protein EJD97_015377 [Solanum chilense]	sp|Q9ZT50|RHA2A_ARATH;	E3 ubiquitin-protein ligase RHA2A OS=Arabidopsis thaliana OX=3702 GN=RHA2A PE=1 SV=1;	PF13639.8;PF13923.8;PF12678.9;PF17123.7;PF14634.8;PF13920.8;PF00097.27;PF17120.7;PF14447.8;PF12861.9	zf-RING_2;zf-C3HC4_2;zf-rbx1;zf-RING_11;zf-RING_5;zf-C3HC4_3;zf-C3HC4;Zn_ribbon_17;Prok-RING_4;zf-ANAPC11	Ring finger domain;Zinc finger, C3HC4 type;RING-H2 zinc finger domain;RING-like zinc finger;zinc-RING finger domain;Zinc finger, C3HC4 type;Zinc finger, C3HC4 type;Zinc-ribbon, C4HC2 type;Prokaryotic RING finger family 4;Anaphase-promoting complex subunit 11 RING-H2 finger
gene_Solyc04g007580.1	Solyc04g007580.1	DUF4228 domain-containing protein (AHRD V3.3 *** A0A1Q3CT45_CEPFO)	7.98	3.87	3.77	29.45	25.56	11.65	31.13	45.41	31.43	86.35	67.68	49.84	5.20667	22.22	35.99	67.9567	------	------	------	------	------	------	ENOG4111CSR;ENOG410YRN3	S:Function unknown;	XP_004237025.1	uncharacterized protein LOC101267223 [Solanum lycopersicum]	------	------	PF14009.8	PADRE	PADRE domain
gene_Solyc04g007800.5	Solyc04g007800.5	Calcium-dependent lipid-binding (CaLB domain) family protein (AHRD V3.11 *** tr|A0A2U1LCF2|A0A2U1LCF2_ARTAN)	27.46	29.51	31.94	53.28	17.95	48.6	45.62	77.41	55.15	19.87	19.21	10.25	29.6367	39.9433	59.3933	16.4433	GO:0009738;GO:0005634;GO:000588	BP:abscisic acid-activated signaling pathway;CC:nucleus;CC:plasma membrane;	------	------	------	------	COG5038	S:Function unknown	XP_004237015.1	protein C2-DOMAIN ABA-RELATED 7-like [Solanum lycopersicum]	sp|Q9SSL1|CAR7_ARATH;	Protein C2-DOMAIN ABA-RELATED 7 OS=Arabidopsis thaliana OX=3702 GN=CAR7 PE=1 SV=1;	PF00168.32	C2	C2 domain
gene_Solyc04g008100.3	Solyc04g008100.3	RING-type E3 ubiquitin transferase (AHRD V3.3 *** A0A2G2ZH40_CAPAN)	0.24	0.05	0.07	0.82	0.18	0.3	0.46	0.35	0.43	2.59	2.69	1.19	0.12	0.433333	0.413333	2.15667	GO:0016567;GO:000484	BP:protein ubiquitination;MF:ubiquitin-protein transferase activity;	------	------	------	------	ENOG410Y3P9	O:Posttranslational modification, protein turnover, chaperones	XP_004236923.1	U-box domain-containing protein 21 [Solanum lycopersicum]	sp|Q5PNY6|PUB21_ARATH;	U-box domain-containing protein 21 OS=Arabidopsis thaliana OX=3702 GN=PUB21 PE=2 SV=1;	PF04564.17;PF11789.10	U-box;zf-Nse	U-box domain;Zinc-finger of the MIZ type in Nse subunit
gene_Solyc04g008210.2	Solyc04g008210.2	ETAG-A3	88.47	102.97	69.93	182.96	64.76	179.21	48.09	68.94	41.63	20.76	12.07	13.84	87.1233	142.31	52.8867	15.5567	GO:0042546;GO:0005975;GO:0071555;GO:0010411;GO:0005618;GO:0016021;GO:0048046;GO:0016762;GO:000455	BP:cell wall biogenesis;BP:carbohydrate metabolic process;BP:cell wall organization;BP:xyloglucan metabolic process;CC:cell wall;CC:integral component of membrane;CC:apoplast;MF:xylogluca;MF:hydrolase activity, hydrolyzing O-glycosyl compounds;	K08235	E2.4.1.207	------	------	COG2273	G:Carbohydrate transport and metabolism	NP_001296719.1	probable xyloglucan endotransglucosylase/hydrolase protein 27 precursor [Solanum lycopersicum]	sp|Q8LDS2|XTH27_ARATH;	Probable xyloglucan endotransglucosylase/hydrolase protein 27 OS=Arabidopsis thaliana OX=3702 GN=XTH27 PE=2 SV=2;	PF00722.23;PF06955.14	Glyco_hydro_16;XET_C	Glycosyl hydrolases family 16;Xyloglucan endo-transglycosylase
gene_Solyc04g011770.2	Solyc04g011770.2	Unknown protein	4.69	4.06	2.86	2.37	1.34	1.75	0.8	1.99	1.55	4	4.94	3.66	3.87	1.82	1.44667	4.2	------	------	------	------	------	------	------	------	XP_004236723.1	uncharacterized protein LOC101253579 [Solanum lycopersicum]	------	------	------	------	------
gene_Solyc04g014400.4	Solyc04g014400.4	LOW QUALITY PROTEIN: LRR receptor-like serine/threonine-protein kinase GS.1	76.57	51.75	56.32	131.95	36.13	98.68	58.89	97.97	37.95	22.23	20.63	12.06	61.5467	88.92	64.9367	18.3067	GO:0016021;GO:0005886;GO:001630	CC:integral component of membrane;CC:plasma membrane;MF:kinase activity;	------	------	------	------	COG4886	S:Function unknown	XP_010319234.1	receptor-like protein 13 isoform X1 [Solanum lycopersicum]	sp|Q9C6A6|RLP13_ARATH;	Receptor-like protein 13 OS=Arabidopsis thaliana OX=3702 GN=RLP13 PE=3 SV=1;	PF13855.8;PF12799.9;PF13516.8	LRR_8;LRR_4;LRR_6	Leucine rich repeat;Leucine Rich repeats;Leucine Rich repeat
gene_Solyc04g014800.3	Solyc04g014800.3	myo-inositol monophosphatase 1	12.94	15.29	13.82	14.5	9.96	15.64	17.25	20.64	11.48	6.12	6.2	4.88	14.0167	13.3667	16.4567	5.73333	GO:0019853;GO:0046855;GO:0080167;GO:0007165;GO:0009409;GO:0006020;GO:0006021;GO:0046854;GO:0005886;GO:0005829;GO:0008934;GO:0046872;GO:0000287;GO:0052834;GO:0052832;GO:0052833;GO:0004869;GO:001034	BP:L-ascorbic acid biosynthetic process;BP:inositol phosphate dephosphorylation;BP:response to karrikin;BP:signal transduction;BP:response to cold;BP:inositol metabolic process;BP:inositol biosynthetic process;BP:phosphatidylinositol phosphorylation;CC:plasma membrane;CC:cytosol;MF:inositol monophosphate 1-phosphatase activity;MF:metal ion binding;MF:magnesium ion binding;MF:inositol monophosphat…	K10047	VTC4	map04070;map01240;map00053;map00562	Phosphatidylinositol signaling system;Biosynthesis of cofactors;Ascorbate and aldarate metabolism;Inositol phosphate metabolism	COG0483	G:Carbohydrate transport and metabolism	NP_001233901.1	inositol monophosphatase 1 [Solanum lycopersicum]	sp|P54926|IMP1_SOLLC;	Inositol monophosphatase 1 OS=Solanum lycopersicum OX=4081 GN=IMP1 PE=1 SV=1;	PF00459.27	Inositol_P	Inositol monophosphatase family
gene_Solyc04g040130.1	Solyc04g040130.1	Fatty acid desaturase (AHRD V3.3 *** E7CCD0_CAMMC)	2.83	1.39	1.36	11.22	6.69	9.32	7.12	12.78	4.85	3.31	3.45	1.45	1.86	9.07667	8.25	2.73667	GO:0006629;GO:0016021;GO:001671	BP:lipid metabolic process;CC:integral component of membrane;MF:oxidoreductase activity, acting on paired donors, with oxidation of a pair of donors resulting in the reduction of molecular oxygen to two molecules of water;	K10256	FAD2	map01040	Biosynthesis of unsaturated fatty acids	COG3239	I:Lipid transport and metabolism	XP_025886451.1	delta(12)-fatty-acid desaturase FAD2-like [Solanum lycopersicum]	sp|Q8GZC3|FAD2_VERFO;	Delt;	PF00487.26;PF11960.10	FA_desaturase;DUF3474	Fatty acid desaturase;Domain of unknown function
gene_Solyc04g048900.3	Solyc04g048900.3	Calreticulin (AHRD V3.3 *** A0A2G3ASL1_CAPCH)	135.07	104.12	110.21	244.01	141.76	210.1	189.07	340.42	130	87.98	102.06	64.86	116.467	198.623	219.83	84.9667	GO:0006457;GO:0030968;GO:0005783;GO:0005788;GO:0005789;GO:0051082;GO:000550	BP:protein folding;BP:endoplasmic reticulum unfolded protein response;CC:endoplasmic reticulum;CC:endoplasmic reticulum lumen;CC:endoplasmic reticulum membrane;MF:unfolded protein binding;MF:calcium ion binding;	K08057	CALR	map04145;map04141	Phagosome;Protein processing in endoplasmic reticulum	ENOG410XRR7	O:Posttranslational modification, protein turnover, chaperones	XP_004237555.1	calreticulin-3-like [Solanum lycopersicum]	sp|O04153|CALR3_ARATH;	Calreticulin-3 OS=Arabidopsis thaliana OX=3702 GN=CRT3 PE=1 SV=2;	PF00262.20	Calreticulin	Calreticulin family
gene_Solyc04g050860.4	Solyc04g050860.4	Myo-inositol-1-phosphate synthase (AHRD V3.11 *-* tr|Q2MJR3|Q2MJR3_SOYBN)	0	0	0.03	0	0.02	0.06	0	0	0.08	0.3	0.65	0.28	0.01	0.026667	0.026667	0.41	GO:0006021;GO:0008654;GO:0005737;GO:000451	BP:inositol biosynthetic process;BP:phospholipid biosynthetic process;CC:cytoplasm;MF:inositol-3-phosphate synthase activity;	K01858	INO1, ISYNA1	map00562	Inositol phosphate metabolism	COG1260	I:Lipid transport and metabolism	XP_006366474.1	PREDICTED: inositol-3-phosphate synthase [Solanum tuberosum]	sp|Q9LW96|INO1_TOBAC;	Inositol-3-phosphate synthase OS=Nicotiana tabacum OX=4097 PE=2 SV=1;	PF07994.14	NAD_binding_5	Myo-inositol-1-phosphate synthase
gene_Solyc04g051280.5	Solyc04g051280.5	nucleolin Chr1:24180973-24182668 REVERSE LENGTH=288 201606 (AHRD V3.11 *-* AT1G65090.3)	1.63	1.32	3.01	2.49	3.12	2.4	2.2	1.91	2.53	7.86	17.03	9.19	1.98667	2.67	2.21333	11.36	GO:000374	MF:translation initiation factor activity;	------	------	------	------	ENOG410ZF20	S:Function unknown	XP_010319806.1	uncharacterized protein LOC101264922 isoform X1 [Solanum lycopersicum]	------	------	------	------	------
gene_Solyc04g051690.4	Solyc04g051690.4	WRKY transcription factor 51	37.32	35.06	42.54	61.17	59.71	58.94	56.11	115.14	29.24	10.01	17.14	8.8	38.3067	59.94	66.83	11.9833	GO:0006355;GO:0005634;GO:0003700;GO:004356	BP:regulation of transcription, DNA-templated;CC:nucleus;MF:transcription factor activity, sequence-specific DNA binding;MF:sequence-specific DNA binding;	------	------	------	------	ENOG410YQZM	K:Transcription	XP_004237467.1	probable WRKY transcription factor 51 [Solanum lycopersicum]	sp|Q93WU9|WRK51_ARATH;	Probable WRKY transcription factor 51 OS=Arabidopsis thaliana OX=3702 GN=WRKY51 PE=1 SV=1;	PF03106.17	WRKY	WRKY DNA -binding domain
gene_Solyc04g056340.4	Solyc04g056340.4	Tyrosine phosphatase family protein (AHRD V3.3 *** A0A2U1PX48_ARTAN)	14.3	17.7	16.8	26.86	19.9	27.54	21.61	26.86	19.22	10.51	11.49	8.35	16.2667	24.7667	22.5633	10.1167	GO:0005737;GO:000472	CC:cytoplasm;MF:protein tyrosine phosphatase activity;	K18045	SIW14, OCA3	------	------	COG2365	T:Signal transduction mechanisms	XP_004237383.1	tyrosine-protein phosphatase DSP3 [Solanum lycopersicum]	sp|Q681Z2|DSP3_ARATH;	Tyrosine-protein phosphatase DSP3 OS=Arabidopsis thaliana OX=3702 GN=DSP3 PE=1 SV=1;	PF03162.15;PF13350.8;PF00782.22	Y_phosphatase2;Y_phosphatase3;DSPc	Tyrosine phosphatase family;Tyrosine phosphatase family;Dual specificity phosphatase, catalytic domain
gene_Solyc04g064530.1	Solyc04g064530.1	polyadenylate-binding protein 1-B-binding protein (AHRD V3.3 *** AT4G19950.1)	69.54	61.99	68.39	131.67	86.04	115.65	106.58	164.95	71.15	47.72	47.07	28.64	66.64	111.12	114.227	41.1433	GO:0016021;GO:000552	CC:integral component of membrane;MF:ATP binding;	------	------	------	------	ENOG410YFUQ	S:Function unknown	XP_004237719.1	uncharacterized protein LOC101258062 [Solanum lycopersicum]	------	------	------	------	------
gene_Solyc04g071660.3	Solyc04g071660.3	hypothetical protein (AHRD V3.3 *-* AT1G76740.1)	3.99	3.78	6.47	3.3	7.84	3.93	6.61	1.89	6.34	7.15	14	14.75	4.74667	5.02333	4.94667	11.9667	------	------	------	------	------	------	ENOG4111CMC	S:Function unknown	XP_010320101.1	uncharacterized protein LOC101253281 isoform X4 [Solanum lycopersicum]	------	------	------	------	------
gene_Solyc04g071900.5	Solyc04g071900.5	Peroxidase (AHRD V3.11 *** tr|K4BTH7|K4BTH7_SOLLC)	11.81	4.84	7	12.91	5.34	8.22	5.49	9.71	4.53	21.09	36.71	15.59	7.88333	8.82333	6.57667	24.4633	GO:0006979;GO:0042744;GO:0055114;GO:0016021;GO:0005576;GO:0009505;GO:0009506;GO:0020037;GO:0046872;GO:000460	BP:response to oxidative stress;BP:hydrogen peroxide catabolic process;BP:oxidation-reduction process;CC:integral component of membrane;CC:extracellular region;CC:plant-type cell wall;CC:plasmodesma;MF:heme binding;MF:metal ion binding;MF:peroxidase activity;	K00430	E1.11.1.7	map00940	Phenylpropanoid biosynthesis	ENOG410ZMT4	G:Carbohydrate transport and metabolism	NP_001334412.1	peroxidase 12 precursor [Solanum lycopersicum]	sp|Q96520|PER12_ARATH;	Peroxidase 12 OS=Arabidopsis thaliana OX=3702 GN=PER12 PE=1 SV=1;	PF00141.25	peroxidase	Peroxidase
gene_Solyc04g072070.4	Solyc04g072070.4	DNA-binding WRKY (AHRD V3.11 *-* tr|A0A200R2S6|A0A200R2S6_9MAGN)	5.83	5.01	3.86	16.62	15.54	11.17	21.12	30.39	6.54	5.84	6.11	2.87	4.9	14.4433	19.35	4.94	GO:0005634;GO:0003700;GO:004356	CC:nucleus;MF:transcription factor activity, sequence-specific DNA binding;MF:sequence-specific DNA binding;	------	------	------	------	ENOG410YQZM	K:Transcription	XP_004237841.1	probable WRKY transcription factor 51 [Solanum lycopersicum]	sp|Q93WU9|WRK51_ARATH;	Probable WRKY transcription factor 51 OS=Arabidopsis thaliana OX=3702 GN=WRKY51 PE=1 SV=1;	PF03106.17	WRKY	WRKY DNA -binding domain
gene_Solyc04g072700.4	Solyc04g072700.4	Heavy metal-associated isoprenylated plant protein (AHRD V3.3 *** A0A2R6RNU7_ACTCH)	1.29	1.41	0.81	0.96	0.7	2.48	2.09	2.81	0.68	0.26	0.26	0.56	1.17	1.38	1.86	0.36	GO:0030001;GO:004687	BP:metal ion transport;MF:metal ion binding;	------	------	------	------	COG2608	S:Function unknown	XP_010320148.1	heavy metal-associated isoprenylated plant protein 24 isoform X2 [Solanum lycopersicum]	sp|O81464|HIP24_ARATH;	Heavy metal-associated isoprenylated plant protein 24 OS=Arabidopsis thaliana OX=3702 GN=HIPP24 PE=1 SV=1;	PF00403.28	HMA	Heavy-metal-associated domain
gene_Solyc04g074000.3	Solyc04g074000.3	Receptor protein kinase, putative (AHRD V3.3 *** A0A061FG24_THECC)	38.89	27.44	34.38	79.53	19.82	46.09	45.94	87.01	21.88	10.7	12.44	4.77	33.57	48.48	51.61	9.30333	GO:0006468;GO:0046777;GO:0016021;GO:0005886;GO:0004672;GO:0004674;GO:000552	BP:protein phosphorylation;BP:protein autophosphorylation;CC:integral component of membrane;CC:plasma membrane;MF:protein kinase activity;MF:protein serine/threonine kinase activity;MF:ATP binding;	------	------	------	------	COG4886	S:Function unknown	XP_010320167.1	MDIS1-interacting receptor like kinase 2-like [Solanum lycopersicum]	sp|Q8VZG8|MIK2_ARATH;	MDIS1-interacting receptor like kinase 2 OS=Arabidopsis thaliana OX=3702 GN=MIK2 PE=1 SV=3;	PF13855.8;PF00069.27;PF07714.19;PF12799.9;PF08263.14	LRR_8;Pkinase;PK_Tyr_Ser-Thr;LRR_4;LRRNT_2	Leucine rich repeat;Protein kinase domain;Protein tyrosine and serine/threonine kinase;Leucine Rich repeats;Leucine rich repeat N-terminal domain
gene_Solyc04g074030.3	Solyc04g074030.3	Receptor protein kinase, putative (AHRD V3.3 *** A0A061FG24_THECC)	0.83	0.31	0.83	0.77	0.23	0.44	1.04	0.77	0.41	0.02	0.13	0.06	0.656667	0.48	0.74	0.07	GO:0006468;GO:0046777;GO:0016021;GO:0005886;GO:0004672;GO:0004674;GO:000552	BP:protein phosphorylation;BP:protein autophosphorylation;CC:integral component of membrane;CC:plasma membrane;MF:protein kinase activity;MF:protein serine/threonine kinase activity;MF:ATP binding;	------	------	------	------	COG4886	S:Function unknown	XP_010320167.1	MDIS1-interacting receptor like kinase 2-like [Solanum lycopersicum]	sp|Q8VZG8|MIK2_ARATH;	MDIS1-interacting receptor like kinase 2 OS=Arabidopsis thaliana OX=3702 GN=MIK2 PE=1 SV=3;	PF00069.27;PF07714.19;PF13855.8;PF12799.9;PF08263.14	Pkinase;PK_Tyr_Ser-Thr;LRR_8;LRR_4;LRRNT_2	Protein kinase domain;Protein tyrosine and serine/threonine kinase;Leucine rich repeat;Leucine Rich repeats;Leucine rich repeat N-terminal domain
gene_Solyc04g074850.3	Solyc04g074850.3	ripening regulated protein DDTFR18	44.32	38.65	36.41	22.32	10.64	16.85	14.33	22.13	15.26	10.34	9.32	4.31	39.7933	16.6033	17.24	7.99	GO:0006855;GO:0055085;GO:0016021;GO:0016020;GO:0015297;GO:0015238;GO:0022857;GO:004291	BP:drug transmembrane transport;BP:transmembrane transport;CC:integral component of membrane;CC:membrane;MF:antiporter activity;MF:drug transmembrane transporter activity;MF:transmembrane transporter activity;MF:xenobiotic transporter activity;	K03327	TC.MATE, SLC47A, norM, mdtK, dinF	------	------	COG0534	V:Defense mechanisms	NP_001234398.2	ripening regulated protein DDTFR18 [Solanum lycopersicum]	sp|Q9FKQ1|DTX27_ARATH;	Protein DETOXIFICATION 27 OS=Arabidopsis thaliana OX=3702 GN=DTX27 PE=2 SV=1;	PF01554.20	MatE	MatE
gene_Solyc04g074880.2	Solyc04g074880.2	purine permease 3-like (AHRD V3.3 *** A0A2G2ZQS5_CAPAN),Pfam:PF16913	0.57	0.11	0.42	0.21	0.05	0.07	0.16	0.07	0.13	0.38	3.04	0.35	0.366667	0.11	0.12	1.25667	GO:0016021;GO:001521	CC:integral component of membrane;MF:purine nucleoside transmembrane transporter activity;	------	------	------	------	ENOG410Y9BB	U:Intracellular trafficking, secretion, and vesicular transport	XP_004237962.1	purine permease 3-like [Solanum lycopersicum]	sp|Q9FZ95|PUP3_ARATH;	Purine permease 3 OS=Arabidopsis thaliana OX=3702 GN=PUP3 PE=2 SV=1;	PF16913.7;PF04142.17;PF00892.22	PUNUT;Nuc_sug_transp;EamA	Purine nucleobase transmembrane transport;Nucleotide-sugar transporter;EamA-like transporter family
gene_Solyc04g076310.4	Solyc04g076310.4	Kinesin-like protein FR.1	2.93	2.7	4.94	2.65	5.37	2.13	4.24	1.31	3.81	4.87	8.51	10.15	3.52333	3.38333	3.12	7.84333	GO:0007018;GO:0007052;GO:0008017;GO:0003777;GO:1990939;GO:000552	BP:microtubule-based movement;BP:mitotic spindle organization;MF:microtubule binding;MF:microtubule motor activity;MF:ATP-dependent microtubule motor activity;MF:ATP binding;	------	------	------	------	COG5059	Z:Cytoskeleton	XP_010320210.1	kinesin-like protein KIN-4C [Solanum lycopersicum]	sp|F4K0J3|KN4C_ARATH;	Kinesin-like protein KIN-4C OS=Arabidopsis thaliana OX=3702 GN=KIN4C PE=2 SV=2;	PF00225.25;PF16796.7	Kinesin;Microtub_bd	Kinesin motor domain;Microtubule binding
gene_Solyc04g076860.3	Solyc04g076860.3	Zinc finger (C3HC4-type RING finger) family protein (AHRD V3.3 *** A0A2K3NFC1_TRIPR)	1.09	2.6	4.6	1.38	2.7	1.26	2.63	0.92	3.75	3.22	12.82	7.51	2.76333	1.78	2.43333	7.85	GO:0009630;GO:0048364;GO:0005886;GO:006163	BP:gravitropism;BP:root development;CC:plasma membrane;MF:ubiquitin protein ligase activity;	------	------	------	------	COG2304	S:Function unknown	XP_004238035.1	E3 ubiquitin-protein ligase WAV3 [Solanum lycopersicum]	sp|Q9LTA6|WAV3_ARATH;	E3 ubiquitin-protein ligase WAV3 OS=Arabidopsis thaliana OX=3702 GN=WAV3 PE=1 SV=1;	PF13519.8;PF00092.30;PF13768.8;PF17123.7;PF13639.8;PF05762.16;PF12678.9;PF00097.27;PF13923.8;PF12861.9;PF14634.8;PF13445.8	VWA_2;VWA;VWA_3;zf-RING_11;zf-RING_2;VWA_CoxE;zf-rbx1;zf-C3HC4;zf-C3HC4_2;zf-ANAPC11;zf-RING_5;zf-RING_UBOX	von Willebrand factor type A domain;von Willebrand factor type A domain;von Willebrand factor type A domain;RING-like zinc finger;Ring finger domain;VWA domain containing CoxE-like protein;RING-H2 zinc finger domain;Zinc finger, C3HC4 type;Zinc finger, C3HC4 type;Anaphase-promoting complex subunit 11 RING-H2 finger;zinc-RING finger domain;RING-type zinc-finger
gene_Solyc04g077310.4	Solyc04g077310.4	G-type lectin S-receptor-like serine/threonine-protein kinase (AHRD V3.11 *-* tr|A0A2G3BAY7|A0A2G3BAY7_CAPCH)	2.9	2.67	4.3	3.31	1.31	2.43	2.93	2.31	1.74	1.03	1.21	0.96	3.29	2.35	2.32667	1.06667	GO:0048544;GO:0016021;GO:0030246;GO:0004674;GO:0005524;GO:0004672;GO:0106310;GO:010631	BP:recognition of pollen;CC:integral component of membrane;MF:carbohydrate binding;MF:protein serine/threonine kinase activity;MF:ATP binding;MF:protein kinase activity;MF:old GO;MF:old GO;	------	------	------	------	COG0515	T:Signal transduction mechanisms	KAG5612913.1	hypothetical protein H5410_024194 [Solanum commersonii]	sp|O81832|Y4729_ARATH;	G-type lectin S-receptor-like serine/threonine-protein kinase At4g27290 OS=Arabidopsis thaliana OX=3702 GN=At4g27290 PE=3 SV=4;	PF01453.26;PF00954.22;PF07714.19;PF00069.27;PF08276.13;PF11883.10	B_lectin;S_locus_glycop;PK_Tyr_Ser-Thr;Pkinase;PAN_2;DUF3403	D-mannose binding lectin;S-locus glycoprotein domain;Protein tyrosine and serine/threonine kinase;Protein kinase domain;PAN-like domain;Domain of unknown function
gene_Solyc04g077490.3	Solyc04g077490.3	AP2-like ethylene-responsive transcription factor ANT (AHRD V3.3 *** A0A2G2Z848_CAPAN)	13.9	10.67	17.85	6.85	9.9	6.59	11.14	6.83	12.67	13.67	52.36	23.3	14.14	7.78	10.2133	29.7767	GO:0006952;GO:0006355;GO:0009873;GO:0005634;GO:0003700;GO:000367	BP:defense response;BP:regulation of transcription, DNA-templated;BP:ethylene-activated signaling pathway;CC:nucleus;MF:transcription factor activity, sequence-specific DNA binding;MF:DNA binding;	K09285	OVM, ANT	------	------	ENOG410Y9X6	K:Transcription	NP_001287930.1	AP2-like ethylene-responsive transcription factor ANT-like [Solanum lycopersicum]	sp|Q38914|ANT_ARATH;	AP2-like ethylene-responsive transcription factor ANT OS=Arabidopsis thaliana OX=3702 GN=ANT PE=1 SV=2;	PF00847.22	AP2	AP2 domain
gene_Solyc04g077540.4	Solyc04g077540.4	Kinesin-like protein (AHRD V3.3 *** A0A2G2ZR89_CAPAN)	2.28	2.77	3.89	1.54	3.41	1.93	3.05	1.18	3.28	3.31	6.79	6.71	2.98	2.29333	2.50333	5.60333	GO:0007018;GO:0005874;GO:1990939;GO:0008017;GO:0005524;GO:000377	BP:microtubule-based movement;CC:microtubule;MF:ATP-dependent microtubule motor activity;MF:microtubule binding;MF:ATP binding;MF:microtubule motor activity;	K11498	CENPE	------	------	COG5059	Z:Cytoskeleton	XP_004238068.1	kinesin-like protein KIN-7N [Solanum lycopersicum]	sp|Q9S7P3|KN7N_ARATH;	Kinesin-like protein KIN-7N OS=Arabidopsis thaliana OX=3702 GN=KIN7N PE=2 SV=1;	PF00225.25	Kinesin	Kinesin motor domain
gene_Solyc04g079210.3	Solyc04g079210.3	Patatin (AHRD V3.3 *** A0A2G2X0P8_CAPBA)	16.39	29.63	26.51	124.95	45	93.23	78.88	115.85	52.19	41.33	42.82	23.51	24.1767	87.7267	82.3067	35.8867	GO:0016042;GO:0005773;GO:0016787;GO:0045735;GO:0004620;GO:004737	BP:lipid catabolic process;CC:vacuole;MF:hydrolase activity;MF:nutrient reservoir activity;MF:phospholipase activity;MF:acylglycerol lipase activity;	------	------	------	------	COG3621	S:Function unknown	XP_015072153.1	patatin-like protein 2 [Solanum pennellii]	sp|O23181|PLP3_ARATH;	Patatin-like protein 3 OS=Arabidopsis thaliana OX=3702 GN=PLP3 PE=2 SV=2;	PF01734.24	Patatin	Patatin-like phospholipase
gene_Solyc04g079560.3	Solyc04g079560.3	Lysine histidine transporter-like 8 (AHRD V3.3 *** A0A1U8GKT6_CAPAN)	14.24	11.58	15.52	7.79	11.08	8.41	11.35	7.06	13.07	11.32	38.93	21.1	13.78	9.09333	10.4933	23.7833	GO:0006865;GO:0016021;GO:000588	BP:amino acid transport;CC:integral component of membrane;CC:plasma membrane;	------	------	------	------	COG0814	E:Amino acid transport and metabolism	XP_004238196.1	lysine histidine transporter-like 8 [Solanum lycopersicum]	sp|Q9SX98|LHTL8_ARATH;	Lysine histidine transporter-like 8 OS=Arabidopsis thaliana OX=3702 GN=AATL1 PE=1 SV=1;	PF01490.20	Aa_trans	Transmembrane amino acid transporter protein
gene_Solyc04g082030.1	Solyc04g082030.1	ornithine decarboxylase	37.05	29.79	35.43	35.01	45.48	23.52	44.63	27.74	77.44	127.59	97.3	164.47	34.09	34.67	49.9367	129.787	GO:0006596;GO:0033387;GO:0005737;GO:0004586;GO:000382	BP:polyamine biosynthetic process;BP:putrescine biosynthetic process from ornithine;CC:cytoplasm;MF:ornithine decarboxylase activity;MF:catalytic activity;	K01581	E4.1.1.17, ODC1, speC, speF	map00480;map00330	Glutathione metabolism;Arginine and proline metabolism	COG0019	E:Amino acid transport and metabolism	NP_001234616.1	ornithine decarboxylase [Solanum lycopersicum]	sp|O22616|DCOR_SOLLC;	Ornithine decarboxylase OS=Solanum lycopersicum OX=4081 GN=ODC PE=2 SV=2;	PF02784.18;PF00278.24	Orn_Arg_deC_N;Orn_DAP_Arg_deC	Pyridoxal-dependent decarboxylase, pyridoxal binding domain;Pyridoxal-dependent decarboxylase, C-terminal sheet domain
gene_Solyc05g006750.3	Solyc05g006750.3	Glutathione S-transferase (AHRD V3.3 *** A0A200QY01_9MAGN)	9.85	10.12	11.6	5.65	1.82	3.42	2	4.62	3.69	0.94	0.78	0.37	10.5233	3.63	3.43667	0.696667	GO:0006749;GO:0005737;GO:0016740;GO:0004364;GO:000551	BP:glutathione metabolic process;CC:cytoplasm;MF:transferase activity;MF:glutathione transferase activity;MF:protein binding;	K00799	GST, gst	map00480	Glutathione metabolism	ENOG410XSIX	O:Posttranslational modification, protein turnover, chaperones	XP_004238745.1	glutathione S-transferase U17 [Solanum lycopersicum]	sp|Q9FUS8|GSTUH_ARATH;	Glutathione S-transferase U17 OS=Arabidopsis thaliana OX=3702 GN=GSTU17 PE=2 SV=1;	PF02798.22;PF13417.8;PF13409.8;PF00043.27	GST_N;GST_N_3;GST_N_2;GST_C	Glutathione S-transferase, N-terminal domain;Glutathione S-transferase, N-terminal domain;Glutathione S-transferase, N-terminal domain;Glutathione S-transferase, C-terminal domain
gene_Solyc05g007760.2	Solyc05g007760.2	SET domain (AHRD V3.3 *** A0A200QP09_9MAGN)	1.7	1.63	2.18	0.75	1.15	0.81	1.57	0.56	1.21	1.78	3.56	3.17	1.83667	0.903333	1.11333	2.83667	GO:000551	MF:protein binding;	------	------	------	------	COG2940	S:Function unknown	XP_010320689.1	uncharacterized protein LOC101244286 [Solanum lycopersicum]	sp|I1R9A9|GRA4_GIBZE;	Methyltransferase FGSG_00040 OS=Gibberella zeae;	PF00856.30;PF00515.30	SET;TPR_1	SET domain;Tetratricopeptide repeat
gene_Solyc05g007770.3	Solyc05g007770.3	NAC domain TF	19.79	20.38	12.57	20.85	16.16	14.05	14.43	18.69	16.88	9.68	7.58	5.87	17.58	17.02	16.6667	7.71	GO:0031155;GO:0010150;GO:0006355;GO:0005634;GO:0043565;GO:000367	BP:regulation of reproductive fruiting body development;BP:leaf senescence;BP:regulation of transcription, DNA-templated;CC:nucleus;MF:sequence-specific DNA binding;MF:DNA binding;	------	------	------	------	ENOG410YB53	K:Transcription	NP_001316452.1	NAC domain-containing protein 1 [Solanum lycopersicum]	sp|K4BWV2|NAP1_SOLLC;	NAC domain-containing protein 1 OS=Solanum lycopersicum OX=4081 GN=NAP1 PE=2 SV=1;	PF02365.17	NAM	No apical meristem
gene_Solyc05g007890.5	Solyc05g007890.5	Myb family transcription factor APL (AHRD V3.11 *** tr|A0A2G2VLB7|A0A2G2VLB7_CAPBA)	38.83	37.74	35.29	25.59	15.45	27.05	16.7	28.16	18.33	9.29	11.37	9.48	37.2867	22.6967	21.0633	10.0467	GO:0005634;GO:000367	CC:nucleus;MF:DNA binding;	------	------	------	------	ENOG4111ACN	K:Transcription	XP_004238822.1	myb family transcription factor PHL8 [Solanum lycopersicum]	sp|F4I274|PHL8_ARATH;	Myb family transcription factor PHL8 OS=Arabidopsis thaliana OX=3702 GN=PHL8 PE=2 SV=1;	PF14379.8;PF00249.33	Myb_CC_LHEQLE;Myb_DNA-binding	MYB-CC type transfactor, LHEQLE motif;Myb-like DNA-binding domain
gene_Solyc05g008960.3	Solyc05g008960.3	Protein kinase family protein (AHRD V3.3 *** A0A1P8BDJ0_ARATH)	3.25	2.44	4.12	11.38	4.14	9.65	6	10.43	2.89	1.89	1.7	1.6	3.27	8.39	6.44	1.73	GO:0006468;GO:0016310;GO:0016021;GO:0016301;GO:0004672;GO:000552	BP:protein phosphorylation;BP:phosphorylation;CC:integral component of membrane;MF:kinase activity;MF:protein kinase activity;MF:ATP binding;	------	------	------	------	COG0515	T:Signal transduction mechanisms	XP_004238902.1	LEAF RUST 10 DISEASE-RESISTANCE LOCUS RECEPTOR-LIKE PROTEIN KINASE-like 1.1 [Solanum lycopersicum]	sp|Q9C6K9|LRL11_ARATH;	LEAF RUST 10 DISEASE-RESISTANCE LOCUS RECEPTOR-LIKE PROTEIN KINASE-like 1.1 OS=Arabidopsis thaliana OX=3702 GN=LRK10L-1.1 PE=2 SV=1;	PF00069.27;PF07714.19;PF14380.8	Pkinase;PK_Tyr_Ser-Thr;WAK_assoc	Protein kinase domain;Protein tyrosine and serine/threonine kinase;Wall-associated receptor kinase C-terminal
gene_Solyc05g008980.2	Solyc05g008980.2	Protein kinase family protein (AHRD V3.3 *** A0A2U1MH78_ARTAN)	7.16	4.83	6.29	14.03	6.5	10.54	11.79	16.64	7.11	5.35	5.12	3.48	6.09333	10.3567	11.8467	4.65	GO:0006468;GO:0016310;GO:0016021;GO:0016301;GO:0004672;GO:000552	BP:protein phosphorylation;BP:phosphorylation;CC:integral component of membrane;MF:kinase activity;MF:protein kinase activity;MF:ATP binding;	------	------	------	------	COG0515	T:Signal transduction mechanisms	XP_004239409.1	LEAF RUST 10 DISEASE-RESISTANCE LOCUS RECEPTOR-LIKE PROTEIN KINASE-like 1.1 [Solanum lycopersicum]	sp|Q9C6K9|LRL11_ARATH;	LEAF RUST 10 DISEASE-RESISTANCE LOCUS RECEPTOR-LIKE PROTEIN KINASE-like 1.1 OS=Arabidopsis thaliana OX=3702 GN=LRK10L-1.1 PE=2 SV=1;	PF00069.27;PF07714.19;PF14380.8;PF03109.18;PF14531.8	Pkinase;PK_Tyr_Ser-Thr;WAK_assoc;ABC1;Kinase-like	Protein kinase domain;Protein tyrosine and serine/threonine kinase;Wall-associated receptor kinase C-terminal;ABC1 atypical kinase-like domain;Kinase-like
gene_Solyc05g009040.3	Solyc05g009040.3	Receptor-like protein kinase (AHRD V3.3 *** D3G6F0_CAPAN)	6.45	5.02	3.6	18.85	3.15	9.62	8.92	15.52	4.2	1.79	1.95	0.77	5.02333	10.54	9.54667	1.50333	GO:0006468;GO:0016021;GO:0004674;GO:0005524;GO:000467	BP:protein phosphorylation;CC:integral component of membrane;MF:protein serine/threonine kinase activity;MF:ATP binding;MF:protein kinase activity;	------	------	------	------	COG0515	T:Signal transduction mechanisms	XP_019069573.2	LOW QUALITY PROTEIN: uncharacterized protein LOC101268684 [Solanum lycopersicum]	sp|P93604|LRK10_WHEAT;	Rust resistance kinase Lr10 OS=Triticum aestivum OX=4565 GN=LRK10 PE=2 SV=1;	PF07714.19;PF00069.27;PF03109.18;PF14380.8	PK_Tyr_Ser-Thr;Pkinase;ABC1;WAK_assoc	Protein tyrosine and serine/threonine kinase;Protein kinase domain;ABC1 atypical kinase-like domain;Wall-associated receptor kinase C-terminal
gene_Solyc05g009310.3	Solyc05g009310.3	Zinc finger protein CONSTANS-LIKE 7 (AHRD V3.3 *** A0A2G2VK65_CAPBA)	100.59	136.41	120.24	104.44	101.78	146.57	95.88	87.67	79.22	36.66	25.09	40.31	119.08	117.597	87.59	34.02	GO:0006355;GO:0005634;GO:0008270;GO:000551	BP:regulation of transcription, DNA-templated;CC:nucleus;MF:zinc ion binding;MF:protein binding;	------	------	------	------	COG5641	K:Transcription	XP_004238926.1	zinc finger protein CONSTANS-LIKE 16-like [Solanum lycopersicum]	sp|Q8RWD0|COL16_ARATH;	Zinc finger protein CONSTANS-LIKE 16 OS=Arabidopsis thaliana OX=3702 GN=COL16 PE=1 SV=2;	PF06203.16;PF00643.26	CCT;zf-B_box	CCT motif;B-box zinc finger
gene_Solyc05g010040.2	Solyc05g010040.2	Unknown protein	34.64	32.87	42.48	82.94	30.53	69.85	58.15	108.21	47.18	24.99	26.98	14.72	36.6633	61.1067	71.18	22.23	------	------	K03574	mutT, NUDT15, MTH2	------	------	------	------	XP_015075084.1	uncharacterized protein LOC107019012 isoform X1 [Solanum pennellii]	------	------	------	------	------
gene_Solyc05g010420.2	Solyc05g010420.2	S-adenosylmethionine decarboxylase	179.43	145.01	181.99	246.14	358.53	210.06	301.39	235.42	472.07	814.04	629.15	968.39	168.81	271.577	336.293	803.86	GO:0006557;GO:0008295;GO:0006597;GO:0005829;GO:000401	BP:S-adenosylmethioninamine biosynthetic process;BP:spermidine biosynthetic process;BP:spermine biosynthetic process;CC:cytosol;MF:adenosylmethionine decarboxylase activity;	K01611	speD, AMD1	map00270;map00330	Cysteine and methionine metabolism;Arginine and proline metabolism	ENOG410XRN0	E:Amino acid transport and metabolism	NP_001234699.1	S-adenosylmethionine decarboxylase [Solanum lycopersicum]	sp|Q38IY3|DCAM_SOLCI;	S-adenosylmethionine decarboxylase proenzyme OS=Solanum chilense OX=4083 GN=SAMDC PE=2 SV=1;	PF01536.18	SAM_decarbox	Adenosylmethionine decarboxylase
gene_Solyc05g010425.1	Solyc05g010425.1	S-adenosylmethionine decarboxylase (AHRD V3.3 *-* Q6KC47_PRUPE)	540.27	415.62	463.81	552.93	749.78	356.81	639.86	483.49	1134.05	1585.77	1252.5	1998.02	473.233	553.173	752.467	1612.1	------	------	------	------	------	------	ENOG410Z6HC	S:Function unknown	BBG94399.1	Adenosylmethionine decarboxylase family protein [Prunus dulcis]	------	------	PF08132.13	AdoMetDC_leader	S-adenosyl-l-methionine decarboxylase leader peptide
gene_Solyc05g012850.3	Solyc05g012850.3	transmembrane protein (AHRD V3.3 *-* AT3G11810.1)	7.37	5.78	4	34.26	15.09	20.21	19.61	29.84	10.67	8.33	6.16	4.04	5.71667	23.1867	20.04	6.17667	GO:001602	CC:integral component of membrane;	------	------	------	------	ENOG41104RA;ENOG410YKVG	S:Function unknown;	XP_004239095.1	uncharacterized protein LOC101256182 [Solanum lycopersicum]	------	------	------	------	------
gene_Solyc05g012950.3	Solyc05g012950.3	Sulfotransferase (AHRD V3.3 *-* A0A200QN29_9MAGN)	0	0	1.13	0	1.4	0	1.02	0	0.68	4.08	2.26	8.96	0.376667	0.466667	0.566667	5.1	GO:0051923;GO:0005737;GO:000814	BP:sulfation;CC:cytoplasm;MF:sulfotransferase activity;	K01025	SULT1	------	------	ENOG4111H56	S:Function unknown	XP_025886869.1	cytosolic sulfotransferase 5 isoform X4 [Solanum lycopersicum]	sp|Q9FX56|SOT8_ARATH;	Cytosolic sulfotransferase 8 OS=Arabidopsis thaliana OX=3702 GN=SOT8 PE=2 SV=1;	PF00685.29	Sulfotransfer_1	Sulfotransferase domain
gene_Solyc05g013530.4	Solyc05g013530.4	Octicosapeptide/phox/Bem1p domain kinase superfamily protein (AHRD V3.3 *-* A0A2K3NXA6_TRIPR)	92.32	102.58	96.14	101.63	62.17	120.81	85.31	115.69	90.11	35.91	29.99	16.86	97.0133	94.87	97.0367	27.5867	GO:000551	MF:protein binding;	------	------	------	------	ENOG410YQPQ	S:Function unknown	XP_010320935.1	uncharacterized protein LOC101267605 isoform X1 [Solanum lycopersicum]	------	------	PF00564.26	PB1	PB1 domain
gene_Solyc05g014270.4	Solyc05g014270.4	TPX2 (Targeting protein for Xklp2) protein family (AHRD V3.3 *-* Q84JG6_ARATH)	0.82	1.6	2.64	0.64	1.47	0.58	1.01	0.87	1.26	1.27	3.2	3.3	1.68667	0.896667	1.04667	2.59	GO:0005737;GO:000587	CC:cytoplasm;CC:microtubule;	------	------	------	------	ENOG4111BVH;ENOG410YSYI	S:Function unknown;	XP_004239498.2	protein WVD2-like 7 isoform X1 [Solanum lycopersicum]	sp|Q67Y69|WDL7_ARATH;	Protein WVD2-like 7 OS=Arabidopsis thaliana OX=3702 GN=WDL7 PE=2 SV=1;	PF06886.13	TPX2	Targeting protein for Xklp2
gene_Solyc05g015780.1	Solyc05g015780.1	Unknown protein	0	0	0	0	0	0	0	0	0	1.78	1.45	0.8	0	0	0	1.34333	GO:0006400;GO:001676	BP:tRNA modification;MF:transferase activity, transferring pentosyl groups;	K00777	QTRT1	------	------	COG0343	J:Translation, ribosomal structure and biogenesis	EYU36480.1	hypothetical protein MIMGU_mgv1a0262791mg, partial [Erythranthe guttata]	sp|A8X0P0|TGT_CAEBR;	Queuine tRNA-ribosyltransferase catalytic subunit OS=Caenorhabditis briggsae OX=6238 GN=tgt-1 PE=3 SV=2;	------	------	------
gene_Solyc05g018060.1	Solyc05g018060.1	Unknown protein	0	0	0.04	0	0	0	0	0	0	10.05	5.97	3.82	0.013333	0	0	6.61333	------	------	------	------	------	------	------	------	TMX05604.1	hypothetical protein EJD97_016000, partial [Solanum chilense]	------	------	------	------	------
gene_Solyc05g021245.1	Solyc05g021245.1	Unknown protein	2.76	0.27	0.19	2.26	0.64	1	1.53	1.07	1.26	0.21	0	0.08	1.07333	1.3	1.28667	0.096667	------	------	------	------	------	------	------	------	------	------	------	------	------	------	------
gene_Solyc05g043390.2	Solyc05g043390.2	U-box domain-containing protein 35 (AHRD V3.3 *-* A0A2G3ANR8_CAPAN)	0.51	0.49	0.81	0.75	0.71	1.25	1.17	0.68	0.85	2.15	1.35	1.29	0.603333	0.903333	0.9	1.59667	GO:0051287;GO:0005524;GO:000467	MF:NAD binding;MF:ATP binding;MF:protein kinase activity;	------	------	------	------	------	------	KAF3651086.1	hypothetical protein FXO38_16793 [Capsicum annuum]	------	------	------	------	------
gene_Solyc05g047680.4	Solyc05g047680.4	Cytochrome P450 (AHRD V3.3 *** A0A2U1MQN4_ARTAN)	0.31	0.81	0.86	6.21	1.21	4.12	4.01	4.15	5.4	1.46	1.33	0.85	0.66	3.84667	4.52	1.21333	GO:0055114;GO:0016021;GO:0004497;GO:0020037;GO:0016705;GO:000550	BP:oxidation-reduction process;CC:integral component of membrane;MF:monooxygenase activity;MF:heme binding;MF:oxidoreductase activity, acting on paired donors, with incorporation or reduction of molecular oxygen;MF:iron ion binding;	K20619	CYP78A	------	------	COG2124	Q:Secondary metabolites biosynthesis, transport and catabolism	XP_004240114.1	cytochrome P450 78A9 [Solanum lycopersicum]	sp|Q9SLP1|C78A9_ARATH;	Cytochrome P450 78A9 OS=Arabidopsis thaliana OX=3702 GN=CYP78A9 PE=1 SV=1;	PF00067.24	p450	Cytochrome P450
gene_Solyc05g048800.4	Solyc05g048800.4	O-glucosyltransferase rumi-like protein (DUF821) (AHRD V3.11 *** tr|A0A1I9LS97|A0A1I9LS97_ARATH)	1.38	0.54	1.08	0.24	0.77	0.82	1.01	0.77	1.08	1.69	1.62	2.31	1	0.61	0.953333	1.87333	GO:0016021;GO:001674	CC:integral component of membrane;MF:transferase activity;	------	------	------	------	ENOG410XT5U	S:Function unknown	XP_015075855.2	O-glucosyltransferase rumi homolog [Solanum pennellii]	sp|Q8NBL1|PGLT1_HUMAN;	Protein O-glucosyltransferase 1 OS=Homo sapiens OX=9606 GN=POGLUT1 PE=1 SV=1;	PF05686.14	Glyco_transf_90	Glycosyl transferase family 90
gene_Solyc05g049980.3	Solyc05g049980.3	Pectin lyase-like superfamily protein (AHRD V3.3 *** A0A1I9LS88_ARATH)	7.74	7.38	12.58	5.37	5.35	3.49	5.38	3.31	5.22	9.75	10.57	16.62	9.23333	4.73667	4.63667	12.3133	GO:0005975;GO:0005618;GO:000465	BP:carbohydrate metabolic process;CC:cell wall;MF:polygalacturonase activity;	------	------	------	------	COG5434	M:Cell wall/membrane/envelope biogenesis	XP_004240097.1	probable polygalacturonase [Solanum lycopersicum]	sp|A7PZL3|PGLR_VITVI;	Probable polygalacturonase OS=Vitis vinifera OX=29760 GN=GSVIVT00026920001 PE=1 SV=1;	PF00295.19;PF12708.9;PF13229.8	Glyco_hydro_28;Pectate_lyase_3;Beta_helix	Glycosyl hydrolases family 28;Pectate lyase superfamily protein;Right handed beta helix region
[truncated: 195 more rows]
